# Supplementary material for: Adapting to Sea Level Rise and Storms
Source: Research Square preprint supplement (doi:10.21203/rs.3.rs-7865982/v1), 2025-11-19
Supplement: Supplementary file 1 [file 0a1a613cd5ccba3707b0dea3.xlsx]

## Sheet: SUMMARY
	HIGH	Growth	0.005	Discount	0.0426
2030		1	2	3	4	5	6	7	8	9	10	11	12	13	14	15	16	17	18	19	20	21	22	23	24	25	26	27	28	29	30	31	32	33	34	35	36	37	38	39	40	41	42	43	44	45	46	47	48
	Segments	Bridgeport_1	Bridgeport_2	Bridgeport_3	Bridgeport_4	Bridgeport_5	Middletown_1	Middletown_2	Middletown_3	Middletown_4	Middletown_5	Middletown_6	Middletown_7	Norfolk_1	Norfolk_2	Norfolk_3	Norfolk_4	Norfolk_5	Norfolk_6	Norfolk_7	Norfolk_8	Norfolk_9	Norfolk_10	Jacksonville_1	Jacksonville_2	Jacksonville_3	Jacksonville_4	Jacksonville_5	Jacksonville_6	Jacksonville_7	Jacksonville_8	Jacksonville_9	Jacksonville_10	Jacksonville_11	Jacksonville_12	Jacksonville_13	Jacksonville_14	Jacksonville_15	Jacksonville_16	Jacksonville_17	Jacksonville_18	Jacksonville_19	Jacksonville_20	Jacksonville_21	Jacksonville_22	Jacksonville_23	Wilmington_1	Wilmington_2	Wilmington_3
	Average Elevation of Wall	1.12	1.12	1.12	1.12	1.12	0.8	0.8	0.8	0.8	0.8	0.8	0.8	0.41	0.41	0.41	0.41	0.41	0.41	0.41	0.41	0.41	0.41	0.6	0.6	0.6	0.6	0.6	0.6	0.6	0.6	0.6	0.6	0.6	0.6	0.6	0.6	0.6	0.6	0.6	0.6	0.6	0.6	0.6	0.6	0.6	0.7	0.7	0.7
	Average height of Walls (m)	#VALUE!	#VALUE!	#VALUE!	#VALUE!	#VALUE!	0.98	1	#VALUE!	0.4	0.92	#VALUE!	#VALUE!	#VALUE!	#VALUE!	#VALUE!	#VALUE!	1.91	#VALUE!	2.01	#VALUE!	#VALUE!	1.73	0.76	0.82	#VALUE!	#VALUE!	#VALUE!	#VALUE!	#VALUE!	#VALUE!	#VALUE!	#VALUE!	#VALUE!	#VALUE!	#VALUE!	#VALUE!	#VALUE!	#VALUE!	#VALUE!	#VALUE!	#VALUE!	#VALUE!	#VALUE!	#VALUE!	#VALUE!	#VALUE!	0.8	#VALUE!
	Wall Length (m)	No_Wall	No_Wall	No_Wall	No_Wall	No_Wall	2384.18	2247.14	No_Wall	3282.69	2795.04	No_Wall	No_Wall	No_Wall	No_Wall	No_Wall	No_Wall	1955.65	No_Wall	7454.22	No_Wall	No_Wall	3715.52	23834.9	42567.2	No_Wall	No_Wall	No_Wall	No_Wall	No_Wall	No_Wall	No_Wall	No_Wall	No_Wall	No_Wall	No_Wall	No_Wall	No_Wall	No_Wall	No_Wall	No_Wall	No_Wall	No_Wall	No_Wall	No_Wall	No_Wall	No_Wall	11151.2	No_Wall
	Residual Dam (million $, PV)	10.3325	37.6767	1.82933	7.14049	2.10534	4.71458	4.34889	0.083848	10.9405	5.1767	0.649174	0	69.9887	4.51896	12.6349	10.0862	23.9738	65.3323	31.8318	1.5425	16.1368	41.345	32.9216	61.4169	4.61583	0.000840209	0.0108541	6.95017e-06	0.930427	0.290094	0.000710083	2.28509	0.107386	0.633475	0.0147102	0.00427925	1.73339e-05	0.00277029	3.08022	29.3535	0.00417786	1.37192	11.9951	0.0214165	55.7302	27.2174	34.7592	10.2366
	Expected Benefit (million $, PV)	No_Wall	No_Wall	No_Wall	No_Wall	No_Wall	43.8329	50.7978	No_Wall	10.367	35.9795	No_Wall	No_Wall	No_Wall	No_Wall	No_Wall	No_Wall	206.756	No_Wall	314.502	No_Wall	No_Wall	72.3245	102.02	333.508	No_Wall	No_Wall	No_Wall	No_Wall	No_Wall	No_Wall	No_Wall	No_Wall	No_Wall	No_Wall	No_Wall	No_Wall	No_Wall	No_Wall	No_Wall	No_Wall	No_Wall	No_Wall	No_Wall	No_Wall	No_Wall	No_Wall	45.045	No_Wall
	Wall Cost (million $,PV)	No_Wall	No_Wall	No_Wall	No_Wall	No_Wall	13.0975	12.8536	No_Wall	3.00432	13.5319	No_Wall	No_Wall	No_Wall	No_Wall	No_Wall	No_Wall	40.8088	No_Wall	172.262	No_Wall	No_Wall	63.6075	78.7476	163.719	No_Wall	No_Wall	No_Wall	No_Wall	No_Wall	No_Wall	No_Wall	No_Wall	No_Wall	No_Wall	No_Wall	No_Wall	No_Wall	No_Wall	No_Wall	No_Wall	No_Wall	No_Wall	No_Wall	No_Wall	No_Wall	No_Wall	40.8223	No_Wall
	Net Benefit	#VALUE!	#VALUE!	#VALUE!	#VALUE!	#VALUE!	30.7355	37.9442	#VALUE!	7.36264	22.4475	#VALUE!	#VALUE!	#VALUE!	#VALUE!	#VALUE!	#VALUE!	165.947	#VALUE!	142.24	#VALUE!	#VALUE!	8.71702	23.2722	169.789	#VALUE!	#VALUE!	#VALUE!	#VALUE!	#VALUE!	#VALUE!	#VALUE!	#VALUE!	#VALUE!	#VALUE!	#VALUE!	#VALUE!	#VALUE!	#VALUE!	#VALUE!	#VALUE!	#VALUE!	#VALUE!	#VALUE!	#VALUE!	#VALUE!	#VALUE!	4.22265	#VALUE!
	Total cost (million $, PV)	10.3325	37.6767	1.82933	7.14049	2.10534	17.812	17.2025	0.083848	13.9448	18.7086	0.649174	0	69.9887	4.51896	12.6349	10.0862	64.7827	65.3323	204.094	1.5425	16.1368	104.953	111.669	225.136	4.61583	0.000840209	0.0108541	6.95017e-06	0.930427	0.290094	0.000710083	2.28509	0.107386	0.633475	0.0147102	0.00427925	1.73339e-05	0.00277029	3.08022	29.3535	0.00417786	1.37192	11.9951	0.0214165	55.7302	27.2174	75.5816	10.2366
	% removed	0	0	0	0	0	0.902887	0.92114	0	0.486541	0.874218	0	0	0	0	0	0	0.896096	0	0.908089	0	0	0.63627	0.75603	0.844485	0	0	0	0	0	0	0	0	0	0	0	0	0	0	0	0	0	0	0	0	0	0	0.564444	0
	B/C	#VALUE!	#VALUE!	#VALUE!	#VALUE!	#VALUE!	3.34667	3.95202	#VALUE!	3.45069	2.65886	#VALUE!	#VALUE!	#VALUE!	#VALUE!	#VALUE!	#VALUE!	5.06644	#VALUE!	1.82572	#VALUE!	#VALUE!	1.13704	1.29553	2.03707	#VALUE!	#VALUE!	#VALUE!	#VALUE!	#VALUE!	#VALUE!	#VALUE!	#VALUE!	#VALUE!	#VALUE!	#VALUE!	#VALUE!	#VALUE!	#VALUE!	#VALUE!	#VALUE!	#VALUE!	#VALUE!	#VALUE!	#VALUE!	#VALUE!	#VALUE!	1.10344	#VALUE!
	Expected Damage	10.3325	37.6767	1.82933	7.14049	2.10534	48.5475	55.1467	0.083848	21.3075	41.1562	0.649174	0	69.9887	4.51896	12.6349	10.0862	230.729	65.3323	346.334	1.5425	16.1368	113.67	134.941	394.925	4.61583	0.000840209	0.0108541	6.95017e-06	0.930427	0.290094	0.000710083	2.28509	0.107386	0.633475	0.0147102	0.00427925	1.73339e-05	0.00277029	3.08022	29.3535	0.00417786	1.37192	11.9951	0.0214165	55.7302	27.2174	79.8042	10.2366
	Top of Wall	#VALUE!	#VALUE!	#VALUE!	#VALUE!	#VALUE!	1.78	1.8	#VALUE!	1.2	1.72	#VALUE!	#VALUE!	#VALUE!	#VALUE!	#VALUE!	#VALUE!	2.32	#VALUE!	2.42	#VALUE!	#VALUE!	2.14	1.36	1.42	#VALUE!	#VALUE!	#VALUE!	#VALUE!	#VALUE!	#VALUE!	#VALUE!	#VALUE!	#VALUE!	#VALUE!	#VALUE!	#VALUE!	#VALUE!	#VALUE!	#VALUE!	#VALUE!	#VALUE!	#VALUE!	#VALUE!	#VALUE!	#VALUE!	#VALUE!	1.5	#VALUE!
	Cost/ Wall length (M$/km)	#VALUE!	#VALUE!	#VALUE!	#VALUE!	#VALUE!	5.49349	5.72	#VALUE!	0.9152	4.84141	#VALUE!	#VALUE!	#VALUE!	#VALUE!	#VALUE!	#VALUE!	20.8671	#VALUE!	23.1094	#VALUE!	#VALUE!	17.1194	3.30387	3.84613	#VALUE!	#VALUE!	#VALUE!	#VALUE!	#VALUE!	#VALUE!	#VALUE!	#VALUE!	#VALUE!	#VALUE!	#VALUE!	#VALUE!	#VALUE!	#VALUE!	#VALUE!	#VALUE!	#VALUE!	#VALUE!	#VALUE!	#VALUE!	#VALUE!	#VALUE!	3.6608	#VALUE!
	Coastal length (m)	5456.48	4422.23	2233.74	2833.89	1749.31	2598.48	3025.54	1168.87	5350.04	5643.74	2523	5101.05	2879.09	2016.52	5997.48	6511.98	3036.51	7490.09	8586.15	14441.5	17232	13306.9	42476.7	56752.7	10394.1	2664.18	5604.03	3459.87	19237.9	9171.29	3370.16	12901.3	10767.6	12711.9	6196.23	2633.65	798.763	16209.5	43904.1	17781.7	20152.9	41265.9	7978.26	18440.2	119608	8401.37	14888	8986.76
	E[Damage]/Coastal Length	1.89363	6.90495	0.335258	1.30862	0.385842	8.89722	10.1066	0.0153667	3.90498	7.54262	0.118973	0	12.8267	0.828183	2.31558	1.84849	42.2854	11.9733	63.472	0.282691	2.95737	20.832	24.7305	72.3772	0.845935	0.000153984	0.00198922	1.27375e-06	0.170518	0.0531651	0.000130136	0.418785	0.0196804	0.116096	0.00269592	0.000784251	3.17675e-06	0.000507707	0.564507	5.37956	0.000765669	0.25143	2.19832	0.00392496	10.2136	4.98809	14.6256	1.87605
2080		1	2	3	4	5	6	7	8	9	10	11	12	13	14	15	16	17	18	19	20	21	22	23	24	25	26	27	28	29	30	31	32	33	34	35	36	37	38	39	40	41	42	43	44	45	46	47	48
	Segments	Bridgeport_1	Bridgeport_2	Bridgeport_3	Bridgeport_4	Bridgeport_5	Middletown_1	Middletown_2	Middletown_3	Middletown_4	Middletown_5	Middletown_6	Middletown_7	Norfolk_1	Norfolk_2	Norfolk_3	Norfolk_4	Norfolk_5	Norfolk_6	Norfolk_7	Norfolk_8	Norfolk_9	Norfolk_10	Jacksonville_1	Jacksonville_2	Jacksonville_3	Jacksonville_4	Jacksonville_5	Jacksonville_6	Jacksonville_7	Jacksonville_8	Jacksonville_9	Jacksonville_10	Jacksonville_11	Jacksonville_12	Jacksonville_13	Jacksonville_14	Jacksonville_15	Jacksonville_16	Jacksonville_17	Jacksonville_18	Jacksonville_19	Jacksonville_20	Jacksonville_21	Jacksonville_22	Jacksonville_23	Wilmington_1	Wilmington_2	Wilmington_3
	Average Elevation of Wall	1.51	1.51	1.51	1.51	1.51	1.19	1.19	1.19	1.19	1.19	1.19	1.19	0.8	0.8	0.8	0.8	0.8	0.8	0.8	0.8	0.8	0.8	0.99	0.99	0.99	0.99	0.99	0.99	0.99	0.99	0.99	0.99	0.99	0.99	0.99	0.99	0.99	0.99	0.99	0.99	0.99	0.99	0.99	0.99	0.99	1.09	1.09	1.09
	Average height of Walls (m)	1.77	1.85	1.55	1.57	1.71	1.33	1.27	1.11	1.01	0.93	0.01	#VALUE!	2.64	2.32	2.28	2.34	1.96	2.08	2.3	#VALUE!	#VALUE!	1.82	0.89	0.73	1.09	#VALUE!	#VALUE!	#VALUE!	1.07	0.83	#VALUE!	1.05	#VALUE!	0.75	#VALUE!	#VALUE!	#VALUE!	#VALUE!	1.11	0.43	#VALUE!	1.05	0.87	#VALUE!	1.29	0.81	1.03	0.41
	Wall Length (m)	5256.48	4282.23	1923.74	2553.89	1529.31	2433.6	2568.09	607.717	4263.91	3755.46	1452.72	No_Wall	2800.11	1911.52	5405.08	5784.66	2326.36	6290.76	8086.01	No_Wall	No_Wall	6353.51	30657.1	45456.4	6088.56	No_Wall	No_Wall	No_Wall	12260.1	4377.06	No_Wall	5837.47	No_Wall	5452.65	No_Wall	No_Wall	No_Wall	No_Wall	34429.1	12389.5	No_Wall	28536.1	3809.13	No_Wall	98917.3	6447.42	12966.5	6882.47
	Residual Dam (million $, PV)	35.3906	24.6826	13.9621	17.0708	12.4228	5.56284	5.98551	2.98155	12.4455	20.1602	2.26369	0.00869532	9.3306	9.64975	27.8839	31.3297	30.5885	34.9372	31.4548	21.5515	262.15	137.357	138.548	225.863	10.6575	0.250723	3.96983	0.0100831	25.7569	17.2902	0.198947	10.0412	41.5438	27.4436	4.36011	1.30237	0.0251202	0.756052	53.5882	54.5649	1.06108	45.5111	21.6325	6.32412	298.047	45.8998	77.7504	32.2166
	Expected Benefit (million $, PV)	219.147	283.879	31.4261	62.4711	37.2932	224.206	166.662	4.81257	60.5591	74.6061	0.660795	No_Wall	2536.5	161.223	434.604	445.905	297.289	180.549	638.649	No_Wall	No_Wall	231.323	366.261	732.99	87.1964	No_Wall	No_Wall	No_Wall	198.116	32.9206	No_Wall	56.4533	No_Wall	27.292	No_Wall	No_Wall	No_Wall	No_Wall	654.64	45.8569	No_Wall	307.634	51.4365	No_Wall	12319.6	43.4933	155.94	9.52774
	Wall Cost (million $,PV)	94.1971	83.8319	26.4367	36.0079	25.579	24.6235	23.6927	4.28295	24.8798	18.5791	0.000830954	No_Wall	111.63	58.8507	160.719	181.178	51.1192	155.678	244.673	No_Wall	No_Wall	120.379	138.901	138.56	41.3775	No_Wall	No_Wall	No_Wall	80.2892	17.2478	No_Wall	36.8128	No_Wall	17.5439	No_Wall	No_Wall	No_Wall	No_Wall	242.643	13.1035	No_Wall	179.957	16.4915	No_Wall	941.56	24.1965	78.6851	6.61772
	Net Benefit	124.95	200.047	4.98947	26.4632	11.7141	199.582	142.969	0.529612	35.6794	56.027	0.659964	#VALUE!	2424.87	102.373	273.885	264.727	246.17	24.8709	393.976	#VALUE!	#VALUE!	110.944	227.359	594.43	45.819	#VALUE!	#VALUE!	#VALUE!	117.827	15.6727	#VALUE!	19.6405	#VALUE!	9.74809	#VALUE!	#VALUE!	#VALUE!	#VALUE!	411.997	32.7533	#VALUE!	127.677	34.945	#VALUE!	11378.1	19.2969	77.2551	2.91002
	Total cost (million $, PV)	129.588	108.515	40.3988	53.0787	38.0018	30.1863	29.6782	7.26451	37.3253	38.7394	2.26452	0.00869532	120.96	68.5005	188.603	212.508	81.7078	190.615	276.128	21.5515	262.15	257.736	277.449	364.423	52.035	0.250723	3.96983	0.0100831	106.046	34.538	0.198947	46.854	41.5438	44.9874	4.36011	1.30237	0.0251202	0.756052	296.231	67.6684	1.06108	225.468	38.124	6.32412	1239.61	70.0963	156.436	38.8343
	% removed	0.860961	0.920007	0.692384	0.785386	0.750125	0.975789	0.965331	0.617461	0.829525	0.787264	0.225953	0	0.996335	0.943527	0.939709	0.934352	0.906707	0.837868	0.95306	0	0	0.627436	0.725544	0.764445	0.891087	0	0	0	0.884949	0.655648	0	0.848992	0	0.498615	0	0	0	0	0.924335	0.456643	0	0.871127	0.703944	0	0.976379	0.48654	0.667293	0.228241
	B/C	2.32647	3.38629	1.18873	1.73493	1.45796	9.10538	7.03432	1.12366	2.43407	4.01558	795.224	#VALUE!	22.7224	2.73953	2.70412	2.46114	5.8156	1.15976	2.61022	#VALUE!	#VALUE!	1.92162	2.63684	5.29007	2.10734	#VALUE!	#VALUE!	#VALUE!	2.46753	1.90868	#VALUE!	1.53352	#VALUE!	1.55564	#VALUE!	#VALUE!	#VALUE!	#VALUE!	2.69795	3.49958	#VALUE!	1.70949	3.11897	#VALUE!	13.0843	1.79751	1.98183	1.43973
	Expected Damage	254.538	308.561	45.3883	79.5419	49.7159	229.769	172.647	7.79412	73.0046	94.7663	2.92449	0.00869532	2545.83	170.873	462.488	477.235	327.878	215.486	670.104	21.5515	262.15	368.68	504.809	958.853	97.8539	0.250723	3.96983	0.0100831	223.873	50.2108	0.198947	66.4945	41.5438	54.7355	4.36011	1.30237	0.0251202	0.756052	708.228	100.422	1.06108	353.146	73.069	6.32412	12617.7	89.3931	233.691	41.7443
	Top of Wall	3.28	3.36	3.06	3.08	3.22	2.52	2.46	2.3	2.2	2.12	1.2	#VALUE!	3.44	3.12	3.08	3.14	2.76	2.88	3.1	#VALUE!	#VALUE!	2.62	1.88	1.72	2.08	#VALUE!	#VALUE!	#VALUE!	2.06	1.82	#VALUE!	2.04	#VALUE!	1.74	#VALUE!	#VALUE!	#VALUE!	#VALUE!	2.1	1.42	#VALUE!	2.04	1.86	#VALUE!	2.28	1.9	2.12	1.5
	Cost/ Wall length	17.9202	19.5767	13.7423	14.0992	16.7259	10.1181	9.22579	7.04761	5.83497	4.94723	0.000572	#VALUE!	39.8661	30.7873	29.7348	31.3204	21.974	24.747	30.2588	#VALUE!	#VALUE!	18.9469	4.53081	3.04819	6.79593	#VALUE!	#VALUE!	#VALUE!	6.54883	3.94051	#VALUE!	6.3063	#VALUE!	3.2175	#VALUE!	#VALUE!	#VALUE!	#VALUE!	7.04761	1.05763	#VALUE!	6.3063	4.32947	#VALUE!	9.51865	3.75289	6.06835	0.961532
	Coastal length	5456.48	4422.23	2233.74	2833.89	1749.31	2598.48	3025.54	1168.87	5350.04	5643.74	2523	5101.05	2879.09	2016.52	5997.48	6511.98	3036.51	7490.09	8586.15	14441.5	17232	13306.9	42476.7	56752.7	10394.1	2664.18	5604.03	3459.87	19237.9	9171.29	3370.16	12901.3	10767.6	12711.9	6196.23	2633.65	798.763	16209.5	43904.1	17781.7	20152.9	41265.9	7978.26	18440.2	119608	8401.37	14888	8986.76
	E[Damage]/Coastal Length	46.6487	56.5495	8.31823	14.5775	9.11135	42.1093	31.6408	1.42841	13.3794	17.3677	0.535965	0.00159358	466.569	31.3156	84.7594	87.462	60.0896	39.4917	122.809	3.9497	48.0439	67.5673	92.5154	175.727	17.9335	0.0459496	0.727544	0.00184792	41.0289	9.20204	0.0364606	12.1863	7.61366	10.0313	0.79907	0.238684	0.00460374	0.13856	129.796	18.4041	0.194462	64.7204	13.3912	1.15901	2312.42	16.3829	42.8281	7.65041
2130		1	2	3	4	5	6	7	8	9	10	11	12	13	14	15	16	17	18	19	20	21	22	23	24	25	26	27	28	29	30	31	32	33	34	35	36	37	38	39	40	41	42	43	44	45	46	47	48
	Segments	Bridgeport_1	Bridgeport_2	Bridgeport_3	Bridgeport_4	Bridgeport_5	Middletown_1	Middletown_2	Middletown_3	Middletown_4	Middletown_5	Middletown_6	Middletown_7	Norfolk_1	Norfolk_2	Norfolk_3	Norfolk_4	Norfolk_5	Norfolk_6	Norfolk_7	Norfolk_8	Norfolk_9	Norfolk_10	Jacksonville_1	Jacksonville_2	Jacksonville_3	Jacksonville_4	Jacksonville_5	Jacksonville_6	Jacksonville_7	Jacksonville_8	Jacksonville_9	Jacksonville_10	Jacksonville_11	Jacksonville_12	Jacksonville_13	Jacksonville_14	Jacksonville_15	Jacksonville_16	Jacksonville_17	Jacksonville_18	Jacksonville_19	Jacksonville_20	Jacksonville_21	Jacksonville_22	Jacksonville_23	Wilmington_1	Wilmington_2	Wilmington_3
	Average Elevation of Wall	2.16	2.16	2.16	2.16	2.16	1.84	1.84	1.84	1.84	1.84	1.84	1.84	1.45	1.45	1.45	1.45	1.45	1.45	1.45	1.45	1.45	1.45	1.64	1.64	1.64	1.64	1.64	1.64	1.64	1.64	1.64	1.64	1.64	1.64	1.64	1.64	1.64	1.64	1.64	1.64	1.64	1.64	1.64	1.64	1.64	1.74	1.74	1.74
	Average height of Walls (m)	1.86	1.5	1.86	1.86	1.64	1.72	1.6	1.62	1.44	0.82	0.14	#VALUE!	3.01	2.81	2.75	2.79	1.47	2.57	2.19	#VALUE!	2.41	2.45	1.4	1.24	1.46	#VALUE!	1.4	1.32	1.54	1.42	1.48	1.46	1.44	1.1	1.42	1.38	1.52	1.4	1.48	1.24	1.4	1.46	1.32	1.4	1.94	1.14	0.84	0.38
	Wall Length (m)	5626.48	4432.23	2403.74	3023.89	1819.31	2743.61	3334.73	1372.98	5591.65	5073.32	1842.72	No_Wall	3008.1	2077.25	6265.82	6898.66	2449.19	7711.23	8481.04	No_Wall	17409.5	13634.1	39148.7	52953	8863.35	No_Wall	5162.85	2891.69	17621.7	8231.74	2862.45	10217.7	9792.33	10049	4372.66	2277.84	516.403	14383.5	40830.4	16195.8	17830.9	37808.2	6328.74	15843.8	117987	7659.33	14005.5	7894.57
	Residual Dam (million $, PV)	151.594	59.804	35.0229	42.9741	39.8336	4.84799	5.70811	2.22145	13.6653	24.7773	6.57243	10.902	5.18978	5.15674	20.0539	19.7953	27.7868	37.8504	131.04	115.519	101.9	80.6553	125.198	291.276	26.2622	#VALUE!	12.7817	5.62082	93.5421	23.5503	11.406	40.1852	28.8641	64.1366	14.4184	4.95941	4.30135	37.3466	135.035	45.9125	43.8204	111.304	30.8792	43.9636	381.302	73.1455	167.726	49.1072
	Expected Benefit (million $, PV)	651.655	319.604	116.623	178.537	202.727	730.349	351.935	229.246	205.661	106.036	2.02179	No_Wall	10263.2	1424.37	2453.73	3862.35	307.644	960.243	830.137	No_Wall	838.65	721.029	1142.66	1308.03	395.522	No_Wall	159.774	39.4593	2457.08	323.515	291.031	837.873	444.209	215.193	184.855	45.0672	101.373	400.234	2165.97	229.379	541.54	1870.61	156.375	501.869	59667.1	123.572	234.441	28.8358
	Wall Cost (million $,PV)	111.342	57.0428	47.5675	59.8395	27.9892	46.4275	48.8311	20.6106	66.3225	19.5126	0.206591	No_Wall	155.891	93.8203	271.044	307.163	30.2728	291.331	232.666	No_Wall	578.384	468.116	438.903	465.725	108.069	No_Wall	57.8817	28.8201	239.048	94.9433	35.8639	124.581	116.147	69.5514	50.4334	24.8129	6.82451	161.256	511.567	142.443	199.906	460.986	63.0756	177.628	2540.01	56.9372	56.5265	6.52066
	Net Benefit	540.314	262.562	69.0558	118.697	174.738	683.922	303.104	208.635	139.339	86.5231	1.8152	#VALUE!	10107.3	1330.55	2182.69	3555.18	277.371	668.912	597.471	#VALUE!	260.267	252.912	703.757	842.304	287.453	#VALUE!	101.892	10.6392	2218.04	228.572	255.167	713.291	328.063	145.641	134.422	20.2543	94.5483	238.978	1654.4	86.9359	341.635	1409.62	93.2991	324.242	57127.1	66.6351	177.914	22.3152
	Total cost (million $, PV)	262.936	116.847	82.5903	102.814	67.8228	51.2755	54.5392	22.8321	79.9878	44.2899	6.77902	10.902	161.081	98.977	291.098	326.959	58.0596	329.181	363.706	115.519	680.284	548.772	564.102	757.002	134.331	11.17	70.6634	34.4409	332.59	118.494	47.2699	164.767	145.011	133.688	64.8518	29.7723	11.1259	198.603	646.602	188.355	243.726	572.29	93.9548	221.591	2921.31	130.083	224.253	55.6279
	% removed	0.811274	0.842376	0.769049	0.805996	0.835779	0.993406	0.98404	0.990403	0.937694	0.81059	0.23525	0	0.999495	0.996393	0.991893	0.994901	0.917161	0.962077	0.863667	0	0.891659	0.899393	0.901252	0.817873	0.937735	0	0.925927	0.875315	0.963326	0.932144	0.962286	0.954234	0.938986	0.770391	0.927645	0.900865	0.959296	0.914652	0.941315	0.833222	0.925139	0.94384	0.835095	0.919456	0.99365	0.62817	0.582944	0.36996
	B/C	5.85274	5.60289	2.45175	2.9836	7.24304	15.731	7.20719	11.1227	3.10093	5.43421	9.78647	#VALUE!	65.8358	15.1819	9.0529	12.5742	10.1624	3.29606	3.56793	#VALUE!	1.44999	1.54028	2.60344	2.80859	3.65992	#VALUE!	2.76035	1.36916	10.2786	3.40746	8.11486	6.72551	3.82455	3.09401	3.66533	1.81628	14.8542	2.48197	4.23398	1.61032	2.70898	4.05784	2.47916	2.8254	23.4909	2.17033	4.14745	4.42222
	Expected Damage	803.25	379.409	151.646	221.511	242.56	735.197	357.643	231.467	219.327	130.813	8.59422	10.902	10268.4	1429.53	2473.78	3882.14	335.431	998.093	961.177	115.519	940.551	801.684	1267.86	1599.31	421.784	11.17	172.556	45.0801	2550.62	347.066	302.437	878.058	473.073	279.329	199.274	50.0266	105.674	437.581	2301	275.291	585.361	1981.91	187.254	545.833	60048.4	196.718	402.167	77.943
	Top of Wall	4.02	3.66	4.02	4.02	3.8	3.56	3.44	3.46	3.28	2.66	1.98	#VALUE!	4.46	4.26	4.2	4.24	2.92	4.02	3.64	#VALUE!	3.86	3.9	3.04	2.88	3.1	#VALUE!	3.04	2.96	3.18	3.06	3.12	3.1	3.08	2.74	3.06	3.02	3.16	3.04	3.12	2.88	3.04	3.1	2.96	3.04	3.58	2.88	2.58	2.12
	Cost/ Wall length	19.7889	12.87	19.7889	19.7889	15.3845	16.922	14.6432	15.0116	11.861	3.84613	0.112112	#VALUE!	51.8238	45.1657	43.2575	44.5251	12.3603	37.78	27.4337	#VALUE!	33.2223	34.3343	11.2112	8.79507	12.1928	#VALUE!	11.2112	9.96653	13.5656	11.5338	12.5291	12.1928	11.861	6.9212	11.5338	10.8932	13.2155	11.2112	12.5291	8.79507	11.2112	12.1928	9.96653	11.2112	21.5278	7.43371	4.03603	0.825968
	Coastal length	5456.48	4422.23	2233.74	2833.89	1749.31	2598.48	3025.54	1168.87	5350.04	5643.74	2523	5101.05	2879.09	2016.52	5997.48	6511.98	3036.51	7490.09	8586.15	14441.5	17232	13306.9	42476.7	56752.7	10394.1	2664.18	5604.03	3459.87	19237.9	9171.29	3370.16	12901.3	10767.6	12711.9	6196.23	2633.65	798.763	16209.5	43904.1	17781.7	20152.9	41265.9	7978.26	18440.2	119608	8401.37	14888	8986.76
	E[Damage]/Coastal Length	147.21	69.5335	27.7919	40.5959	44.4536	134.738	65.5446	42.4206	40.1956	23.9739	1.57505	1.99799	1881.87	261.987	453.366	711.473	61.4738	182.919	176.153	21.171	172.373	146.923	232.358	293.102	77.2997	2.0471	31.624	8.26175	467.449	63.6061	55.4271	160.92	86.6993	51.1922	36.5205	9.16828	19.3667	80.1947	421.701	50.4522	107.278	363.222	34.3177	100.034	11005	36.0521	73.7045	14.2845
HIGH	12 ft wall	Bridgeport_1	Bridgeport_2	Bridgeport_3	Bridgeport_4	Bridgeport_5	Middletown_1	Middletown_2	Middletown_3	Middletown_4	Middletown_5	Middletown_6	Middletown_7	Norfolk_1	Norfolk_2	Norfolk_3	Norfolk_4	Norfolk_5	Norfolk_6	Norfolk_7	Norfolk_8	Norfolk_9	Norfolk_10	Jacksonville_1	Jacksonville_2	Jacksonville_3	Jacksonville_4	Jacksonville_5	Jacksonville_6	Jacksonville_7	Jacksonville_8	Jacksonville_9	Jacksonville_10	Jacksonville_11	Jacksonville_12	Jacksonville_13	Jacksonville_14	Jacksonville_15	Jacksonville_16	Jacksonville_17	Jacksonville_18	Jacksonville_19	Jacksonville_20	Jacksonville_21	Jacksonville_22	Jacksonville_23	Wilmington_1	Wilmington_2	Wilmington_3
	2030	780.331	452.816	343.551	442.856	229.49	233.514	317.412	130.823	510.477	563.187	270.224	468.329	232.99	163.025	490.921	536.5	253.535	616.147	695.125	1229.7	1428.5	1123.04	3549.1	4671.04	924.565	228.389	468.089	301.355	1632.72	775.509	295.811	1183.38	906.527	1093.28	571.153	225.734	80.3308	1376.14	3682.84	1482.81	1730.63	3473.01	720.473	1605.96	9955.42	706.736	1342.02	805.739
	2080	817.371	467.024	367.684	467.123	244.817	239.364	335.474	136.893	527.874	585.627	285.685	481.387	238.87	166.895	510.146	561.601	270.236	643.817	712.886	1328.59	1503.19	1202.13	3663.03	4779.36	992.679	239.182	482.952	318.377	1698.68	804.843	313.041	1280.97	938.725	1145.46	613.939	235.984	89.5495	1431.41	3813.86	1530.15	1817.5	3597.63	779.739	1698.73	10254.1	727.803	1381.46	828.628
	2130	870.986	488.031	403.237	502.023	267.159	248.222	363.608	145.454	553.75	618.631	309.189	500.914	247.768	172.697	538.293	597.825	295.412	683.75	739.457	1459.09	1606.35	1306.87	3834.16	4944.64	1100.29	255.255	505.203	343.536	1795.36	847.552	337.723	1417.99	985.867	1221.35	670.222	250.816	101.51	1511.86	4015.77	1603.28	1951.07	3782.13	871.995	1839.1	10706.2	759.939	1441.78	863.722
	cost	14.4792
[truncated: 5 more columns]

## Sheet: Annual Damage
	Interest rate	0.0426
	Segments	Bridgeport_1	Bridgeport_2	Bridgeport_3	Bridgeport_4	Bridgeport_5	Middletown_1	Middletown_2	Middletown_3	Middletown_4	Middletown_5	Middletown_6	Middletown_7	Norfolk_1	Norfolk_2	Norfolk_3	Norfolk_4	Norfolk_5	Norfolk_6	Norfolk_7	Norfolk_8	Norfolk_9	Norfolk_10	Jacksonville_1	Jacksonville_2	Jacksonville_3	Jacksonville_4	Jacksonville_5	Jacksonville_6	Jacksonville_7	Jacksonville_8	Jacksonville_9	Jacksonville_10	Jacksonville_11	Jacksonville_12	Jacksonville_13	Jacksonville_14	Jacksonville_15	Jacksonville_16	Jacksonville_17	Jacksonville_18	Jacksonville_19	Jacksonville_20	Jacksonville_21	Jacksonville_22	Jacksonville_23	Wilmington_1	Wilmington_2	Wilmington_3
0	2030	0.273005	0.939481	0.0483585	0.169375	0.0557175	5.14818	7.38976	0.00100109	2.7752	4.65631	0.0212283	0	1.33366	0.0853881	0.240287	0.16907	45.7285	7.87487	11.4095	0.0360557	0.373153	3.98855	0.966648	2.80256	0.0490335	1.24453e-05	0.000176527	0	0.0172559	0.00547112	6.1989e-06	0.0246528	0.00182226	0.0114617	0.00021607	6.38259e-05	0	2.40074e-05	0.0574114	0.212677	3.69877e-05	0.025388	0.0959098	0.000313326	1.03957	0.60171	1.68685	0.179114
1	2031	0.314227	0.974626	0.0557363	0.181025	0.068633	5.17402	7.42682	0.00101035	2.78912	4.67967	0.0213351	5.92321e-10	1.34034	0.0858161	0.241492	0.169918	45.9577	7.91434	11.4666	0.0362365	0.375023	4.00854	0.971494	2.8166	0.0492793	1.25077e-05	0.000177412	0	0.0173424	0.00549854	6.22997e-06	0.0247764	0.00183139	0.0115192	0.000217153	6.41458e-05	0	2.41278e-05	0.0576991	0.213743	3.71731e-05	0.0255152	0.0963905	0.000314897	1.04479	0.604726	1.69531	0.180012
2	2032	0.315802	0.979512	0.0560157	0.181932	0.068977	5.19995	7.46405	0.00101542	2.80311	4.70313	0.0214421	5.9529e-10	1.34706	0.0862463	0.242702	0.170769	46.188	7.95401	11.5241	0.0364181	0.376903	4.02863	0.976363	2.83072	0.0495263	1.25704e-05	0.000178301	0	0.0174293	0.0055261	6.2612e-06	0.0249006	0.00184057	0.0115769	0.000218242	6.44674e-05	0	2.42487e-05	0.0579884	0.214815	3.73595e-05	0.0256431	0.0968737	0.000316475	1.05002	0.607757	1.7038	0.180914
3	2033	0.363189	1.13472	0.0643229	0.211131	0.0790085	5.45346	7.82793	0.00106492	2.93976	4.93241	0.0224874	6.24311e-10	1.41273	0.0904509	0.254534	0.179094	48.4398	8.34178	12.0859	0.0381935	0.395278	4.22503	1.02396	2.96872	0.0519408	1.31832e-05	0.000186993	0	0.018279	0.0057955	6.56644e-06	0.0261145	0.0019303	0.0121413	0.000228881	6.76102e-05	0	2.54309e-05	0.0608154	0.225287	3.91808e-05	0.0268932	0.101596	0.000331904	1.10121	0.749587	2.1007	0.215043
4	2034	0.365009	1.1404	0.0646453	0.212189	0.0794046	5.48079	7.86717	0.00107026	2.9545	4.95713	0.0226001	6.2744e-10	1.41981	0.0909042	0.25581	0.179992	48.6826	8.38359	12.1465	0.038385	0.397259	4.24621	1.02909	2.9836	0.0522011	1.32493e-05	0.000187931	0	0.0183707	0.00582455	6.59935e-06	0.0262454	0.00193998	0.0122022	0.000230028	6.79491e-05	0	2.55583e-05	0.0611202	0.226416	3.93772e-05	0.027028	0.102106	0.000333568	1.10673	0.753345	2.11123	0.216121
5	2035	0.366839	1.14612	0.0649693	0.213252	0.0798026	6.30112	8.97565	0.00135893	3.38673	5.68688	0.0256754	1.87707e-09	1.67648	0.107457	0.302135	0.216591	54.9881	9.48288	13.6655	0.0438796	0.454816	4.78956	1.03425	2.99856	0.0524628	1.33157e-05	0.000188873	0	0.0184628	0.00585375	6.63243e-06	0.026377	0.0019497	0.0122633	0.000231182	6.82897e-05	0	2.56864e-05	0.0614266	0.227551	3.95745e-05	0.0271635	0.102617	0.00033524	1.11228	0.757121	2.12182	0.217204
6	2036	0.368678	1.15187	0.065295	0.214321	0.0802026	5.41061	7.6801	0.00108102	2.89978	4.87908	0.0228272	6.33746e-10	1.68488	0.107996	0.303649	0.217677	55.2637	9.53041	13.734	0.0440995	0.457096	4.81357	1.31122	3.80149	0.0622832	1.63473e-05	0.000229104	0	0.0219934	0.00695875	8.88577e-06	0.0313237	0.00235325	0.0143783	0.000284153	8.37635e-05	0	3.44089e-05	0.0731407	0.287268	5.30225e-05	0.032375	0.127113	0.000412042	1.32423	0.760916	2.13245	0.218293
7	2037	0.370526	1.15764	0.0656223	0.215396	0.0806046	5.43773	7.7186	0.00108643	2.91432	4.90354	0.0229416	6.36922e-10	1.69333	0.108537	0.305171	0.218768	55.5407	9.57819	13.8029	0.0443206	0.459387	4.83769	1.31779	3.82054	0.0625954	1.64293e-05	0.000230252	0	0.0221036	0.00699363	8.93031e-06	0.0314807	0.00236505	0.0144504	0.000285577	8.41834e-05	0	3.45814e-05	0.0735073	0.288708	5.32882e-05	0.0325373	0.12775	0.000414107	1.33087	0.76473	2.14314	0.219387
8	2038	0.40859	1.28595	0.0722555	0.239882	0.0885301	6.39635	9.1113	0.00137947	3.43791	5.77282	0.0260634	1.90544e-09	1.70182	0.109081	0.306701	0.219864	55.8191	9.6262	13.8721	0.0445427	0.46169	4.86194	1.3244	3.83969	0.0629092	1.65116e-05	0.000231406	0	0.0222144	0.00702869	8.97507e-06	0.0316385	0.0023769	0.0145228	0.000287009	8.46053e-05	0	3.47548e-05	0.0738758	0.290155	5.35553e-05	0.0327004	0.12839	0.000416183	1.33754	0.912979	2.55769	0.25076
9	2039	0.410638	1.29239	0.0726177	0.241085	0.0889738	6.42841	9.15697	0.00138638	3.45514	5.80176	0.0261941	1.91499e-09	1.71035	0.109628	0.308238	0.220966	56.0989	9.67445	13.9416	0.044766	0.464004	4.88631	1.33104	3.85894	0.0632245	1.65944e-05	0.000232566	0	0.0223258	0.00706392	9.02006e-06	0.0317971	0.00238882	0.0145956	0.000288448	8.50294e-05	0	3.4929e-05	0.0742461	0.291609	5.38238e-05	0.0328643	0.129034	0.000418269	1.34424	0.917555	2.57051	0.252017
10	2040	0.412696	1.29887	0.0729817	0.242293	0.0894198	7.37255	10.3953	0.00175172	3.94606	6.64086	0.0298071	4.60973e-09	2.01441	0.129263	0.363134	0.265111	63.3911	10.9466	15.6852	0.0510895	0.530376	5.51179	1.33771	3.87828	0.0635414	1.66776e-05	0.000233732	0	0.0224377	0.00709933	9.06527e-06	0.0319565	0.00240079	0.0146688	0.000289893	8.54556e-05	0	3.5104e-05	0.0746182	0.293071	5.40936e-05	0.0330291	0.12968	0.000420366	1.35098	0.922154	2.5834	0.253281
11	2041	0.414765	1.30538	0.0733475	0.243508	0.089868	7.40951	10.4474	0.0017605	3.96584	6.67415	0.0299565	4.63284e-09	2.02451	0.129911	0.364954	0.26644	63.7089	11.0014	15.7638	0.0513456	0.533035	5.53942	1.71828	4.98307	0.0760784	2.04234e-05	0.000282997	0	0.0266802	0.00842403	1.20017e-05	0.0382583	0.00289266	0.0171656	0.000355402	0.000104565	0	4.64692e-05	0.0886883	0.374976	7.16192e-05	0.0392958	0.162737	0.000515361	1.60552	0.926776	2.59634	0.25455
12	2042	0.416844	1.31193	0.0737152	0.244728	0.0903185	7.44665	10.4998	0.00176933	3.98572	6.7076	0.0301067	4.65606e-09	2.03466	0.130562	0.366784	0.267776	64.0282	11.0566	15.8428	0.051603	0.535707	5.56719	1.72689	5.00805	0.0764598	2.05257e-05	0.000284416	0	0.026814	0.00846625	1.20619e-05	0.0384501	0.00290716	0.0172517	0.000357183	0.000105089	0	4.67021e-05	0.0891328	0.376855	7.19782e-05	0.0394927	0.163553	0.000517944	1.61357	0.931422	2.60936	0.255826
13	2043	0.459927	1.45847	0.0812159	0.272987	0.099259	7.48397	10.5524	0.0017782	4.0057	6.74123	0.0302576	4.6794e-09	2.04486	0.131216	0.368622	0.269118	64.3492	11.112	15.9222	0.0518617	0.538392	5.59509	1.73555	5.03315	0.076843	2.06286e-05	0.000285841	0	0.0269484	0.00850869	1.21223e-05	0.0386428	0.00292174	0.0173382	0.000358974	0.000105616	0	4.69362e-05	0.0895796	0.378744	7.2339e-05	0.0396907	0.164373	0.00052054	1.62165	1.12413	3.1481	0.293713
14	2044	0.462232	1.46578	0.081623	0.274356	0.0997565	7.52149	10.6053	0.00178711	4.02578	6.77502	0.0304093	4.70285e-09	2.05511	0.131874	0.37047	0.270467	64.6717	11.1677	16.0021	0.0521216	0.541091	5.62314	1.74425	5.05838	0.0772282	2.0732e-05	0.000287274	0	0.0270834	0.00855134	1.21831e-05	0.0388365	0.00293638	0.0174251	0.000360773	0.000106145	0	4.71715e-05	0.0900286	0.380643	7.27016e-05	0.0398896	0.165196	0.000523149	1.62978	1.12976	3.16388	0.295186
15	2045	0.464549	1.47313	0.0820321	0.275731	0.100257	8.60784	11.9831	0.00224747	4.58234	7.74026	0.0346695	9.95299e-09	2.41437	0.155103	0.435352	0.32356	73.1079	12.6402	18.0044	0.0593923	0.617555	6.3434	1.75299	5.08373	0.0776153	2.08359e-05	0.000288714	0	0.0272192	0.0085942	1.22442e-05	0.0390312	0.0029511	0.0175124	0.000362582	0.000106677	0	4.74079e-05	0.0904799	0.382551	7.3066e-05	0.0400896	0.166025	0.000525772	1.63795	1.13543	3.17974	0.296665
16	2046	0.466878	1.48051	0.0824433	0.277113	0.100759	8.65099	12.0431	0.00225874	4.60531	7.77906	0.0348433	1.00029e-08	2.42648	0.155881	0.437534	0.325182	73.4744	12.7035	18.0947	0.05969	0.62065	6.37519	2.27973	6.61496	0.093859	2.54557e-05	0.000348943	4.6418e-09	0.0323056	0.0101785	1.60489e-05	0.047175	0.00354963	0.0204618	0.000443443	0.000130234	1.15593e-08	6.21481e-05	0.107341	0.49577	9.57352e-05	0.0476083	0.211098	0.000643082	1.94293	1.14112	3.19568	0.298152
17	2047	0.469218	1.48794	0.0828565	0.278502	0.101264	8.69435	12.1035	0.00227006	4.62839	7.81805	0.035018	1.0053e-08	2.43864	0.156662	0.439727	0.326812	73.8427	12.7672	18.1854	0.0599892	0.623761	6.40715	2.29116	6.64812	0.0943294	2.55833e-05	0.000350692	4.66506e-09	0.0324675	0.0102295	1.61294e-05	0.0474115	0.00356742	0.0205643	0.000445666	0.000130887	1.16172e-08	6.24596e-05	0.107879	0.498255	9.6215e-05	0.0478469	0.212156	0.000646306	1.95267	1.14684	3.2117	0.299647
18	2048	0.517999	1.65571	0.0913426	0.311217	0.111355	8.73793	12.1642	0.00228144	4.65159	7.85724	0.0351935	1.01034e-08	2.45086	0.157448	0.441931	0.32845	74.2128	12.8312	18.2765	0.0602899	0.626888	6.43927	2.30264	6.68144	0.0948023	2.57116e-05	0.00035245	4.68845e-09	0.0326303	0.0102808	1.62102e-05	0.0476491	0.0035853	0.0206674	0.0004479	0.000131543	1.16755e-08	6.27727e-05	0.10842	0.500752	9.66973e-05	0.0480867	0.21322	0.000649545	1.96246	1.40002	3.91942	0.345936
19	2049	0.520596	1.66401	0.0918004	0.312777	0.111913	8.78173	12.2251	0.00229288	4.67491	7.89663	0.0353699	1.01541e-08	2.46315	0.158237	0.444146	0.330097	74.5848	12.8955	18.3682	0.0605921	0.63003	6.47154	2.31418	6.71494	0.0952775	2.58404e-05	0.000354217	4.71195e-09	0.0327938	0.0103323	1.62915e-05	0.047888	0.00360327	0.020771	0.000450145	0.000132202	1.1734e-08	6.30874e-05	0.108963	0.503262	9.7182e-05	0.0483278	0.214289	0.000652801	1.9723	1.40704	3.93907	0.34767
20	2050	0.523205	1.67235	0.0922606	0.314344	0.112474	10.0177	13.7535	0.00287054	5.30076	8.99601	0.0404111	1.97218e-08	2.88651	0.185646	0.520625	0.393771	84.3476	14.514	20.669	0.068945	0.718048	7.3012	3.04396	8.8392	0.116515	3.14999e-05	0.000427359	2.00601e-08	0.0388466	0.0122126	2.11706e-05	0.0585042	0.00432673	0.0242444	0.000549282	0.000161046	4.9955e-08	8.20203e-05	0.129019	0.659989	0.000126173	0.0572822	0.275978	0.000796716	2.335	1.41409	3.95881	0.349412
21	2051	0.577905	1.86304	0.101771	0.351964	0.123757	10.0679	13.8225	0.00288493	5.32733	9.0411	0.0406136	1.98206e-08	2.90098	0.186577	0.523235	0.395744	84.7704	14.5868	20.7726	0.0692906	0.721647	7.3378	3.05922	8.8835	0.117099	3.16578e-05	0.000429501	2.01607e-08	0.0390413	0.0122739	2.12767e-05	0.0587975	0.00434842	0.0243659	0.000552035	0.000161853	5.02054e-08	8.24315e-05	0.129665	0.663297	0.000126805	0.0575694	0.277362	0.00080071	2.3467	1.72653	4.83236	0.406102
22	2052	0.580801	1.87238	0.102281	0.353728	0.124377	11.4406	15.489	0.00359611	6.01593	10.2648	0.0465101	3.61909e-08	3.39111	0.218352	0.611805	0.470758	95.7614	16.4188	23.3783	0.0787379	0.821382	8.27955	3.07455	8.92803	0.117686	3.18164e-05	0.000431654	2.02617e-08	0.039237	0.0123354	2.13834e-05	0.0590922	0.00437022	0.0244881	0.000554802	0.000162665	5.0457e-08	8.28447e-05	0.130315	0.666622	0.000127441	0.0578579	0.278752	0.000804724	2.35847	1.73519	4.85658	0.408138
23	2053	0.583713	1.88176	0.102794	0.355502	0.125	11.498	15.5666	0.00361413	6.04608	10.3163	0.0467432	3.63724e-08	3.40811	0.219447	0.614871	0.473118	96.2414	16.5011	23.4955	0.0791325	0.825499	8.32106	4.08552	11.8743	0.145675	3.87032e-05	0.000519883	5.39996e-08	0.046385	0.0145498	2.75786e-05	0.0730395	0.00523881	0.0285732	0.000675529	0.000197748	1.34473e-07	0.000106931	0.15399	0.883614	0.000164129	0.0684422	0.363374	0.000980115	2.78653	1.74388	4.88092	0.410184
24	2054	0.645063	2.09915	0.113456	0.39891	0.137621	11.5556	15.6447	0.00363225	6.07639	10.368	0.0469775	3.65547e-08	3.42519	0.220547	0.617953	0.475489	96.7238	16.5838	23.6133	0.0795292	0.829637	8.36276	4.106	11.9338	0.146405	3.88972e-05	0.000522489	5.42703e-08	0.0466175	0.0146228	2.77168e-05	0.0734056	0.00526507	0.0287164	0.000678915	0.000198739	1.35147e-07	0.000107467	0.154761	0.888043	0.000164952	0.0687852	0.365195	0.000985028	2.8005	2.13615	5.97798	0.480509
25	2055	0.67651	2.20148	0.118988	0.418357	0.14433	13.6452	18.2284	0.00470497	7.13092	12.2386	0.0562787	6.64574e-08	4.16775	0.268673	0.752127	0.588604	113.779	19.3755	27.7375	0.09419	0.98419	9.84819	5.74454	16.7119	0.191526	4.92768e-05	0.000655541	1.20943e-07	0.0573865	0.0179588	3.70538e-05	0.095847	0.00657506	0.0350214	0.000860854	0.000251621	3.01179e-07	0.000143823	0.190431	1.23989	0.00022011	0.0847333	0.502312	0.00124948	3.44545	2.24029	6.26941	0.503934
26	2056	0.747968	2.45963	0.131407	0.470546	0.158997	13.7136	18.3197	0.00472856	7.16666	12.2999	0.0565608	6.67905e-08	4.18864	0.27002	0.755897	0.591554	114.35	19.4727	27.8766	0.0946622	0.989123	9.89755	5.77333	16.7957	0.192486	4.95238e-05	0.000658827	1.21549e-07	0.0576741	0.0180488	3.72395e-05	0.0963274	0.00660802	0.0351969	0.000865169	0.000252882	3.02689e-07	0.000144544	0.191385	1.2461	0.000221214	0.0851581	0.504829	0.00125574	3.46272	2.71691	7.60336	0.595684
27	2057	0.751717	2.47196	0.132066	0.472905	0.159793	15.4512	20.3894	0.00584597	8.02691	13.8614	0.0651023	1.12057e-07	4.87199	0.314444	0.879459	0.699826	128.547	21.696	31.3872	0.107317	1.12318	11.1714	5.80227	16.8798	0.19345	4.97721e-05	0.000662129	1.22158e-07	0.0579632	0.0181393	3.74262e-05	0.0968103	0.00664114	0.0353733	0.000869505	0.00025415	3.04206e-07	0.000145268	0.192344	1.25235	0.000222322	0.0855849	0.50736	0.00126204	3.48007	2.73053	7.64147	0.59867
28	2058	0.788364	2.59247	0.138504	0.495959	0.167584	16.2045	21.3834	0.00613097	8.41824	14.5372	0.0682762	1.1752e-07	5.1095	0.329773	0.922334	0.733943	134.814	22.7537	32.9174	0.112549	1.17793	11.716	8.18	23.8191	0.256336	6.29325e-05	0.000829313	2.38599e-07	0.0711951	0.022226	4.97353e-05	0.127992	0.00827935	0.0432896	0.00110035	0.000321168	5.94174e-07	0.000193292	0.236151	1.76263	0.000294795	0.1052	0.704787	0.00159785	4.27199	2.86364	8.014	0.627856
29	2059	0.872018	2.90166	0.153047	0.559245	0.18472	16.2857	21.4906	0.0061617	8.46043	14.6101	0.0686184	1.18109e-07	5.13511	0.331426	0.926957	0.737622	135.489	22.8677	33.0824	0.113113	1.18384	11.7747	8.22101	23.9385	0.257621	6.32479e-05	0.00083347	2.39795e-07	0.071552	0.0223374	4.99846e-05	0.128633	0.00832085	0.0435066	0.00110587	0.000322778	5.97152e-07	0.000194261	0.237335	1.77146	0.000296273	0.105727	0.70832	0.00160586	4.29341	3.43493	9.61471	0.749667
30	2060	0.876389	2.9162	0.153815	0.562048	0.185646	16.3674	21.5983	0.00619259	8.50284	14.6833	0.0689623	1.18701e-07	5.95807	0.385001	1.07581	0.870277	151.83	25.3653	37.2587	0.128104	1.34288	13.2926	11.1783	32.5779	0.331266	7.64942e-05	0.000998653	4.11049e-07	0.0840326	0.0261671	6.33116e-05	0.164988	0.00992355	0.0512916	0.00133856	0.000390166	1.02362e-06	0.000246406	0.278609	2.4055	0.000374352	0.124266	0.95108	0.00194484	5.03925	3.45215	9.6629	0.753424
31	2061	0.969773	3.27061	0.17006	0.635488	0.204745	18.3623	23.9701	0.00762619	9.4861	16.4864	0.0795897	1.93081e-07	5.98793	0.386931	1.0812	0.874639	152.591	25.4924	37.4455	0.128746	1.34961	13.3592	11.2343	32.7412	0.332926	7.68777e-05	0.00100366	4.13109e-07	0.0844538	0.0262982	6.36289e-05	0.165815	0.0099733	0.0515487	0.00134527	0.000392121	1.02875e-06	0.000247641	0.280006	2.41756	0.000376229	0.124889	0.955847	0.00195458	5.06451	4.09546	11.4682	0.909444
32	2062	0.974634	3.28701	0.170912	0.638674	0.205772	20.5142	26.5364	0.00935636	10.5434	18.4451	0.092105	3.06006e-07	6.93051	0.448382	1.25175	1.02918	170.417	28.1612	42.185	0.145675	1.52945	15.0845	15.3573	44.7926	0.43324	9.28112e-05	0.00120047	6.65003e-07	0.0989699	0.0307367	8.02009e-05	0.215196	0.0118732	0.0611993	0.00162536	0.000473143	1.65603e-06	0.000312614	0.327983	3.30134	0.000472986	0.146474	1.29295	0.00236298	5.93127	4.11599	11.5257	0.914003
33	2063	0.979519	3.30348	0.171769	0.641875	0.206803	20.6171	26.6694	0.00940326	10.5963	18.5376	0.0925666	3.0754e-07	6.96524	0.45063	1.25802	1.03434	171.271	28.3023	42.3965	0.146405	1.53712	15.1601	15.4343	45.0172	0.435411	9.32765e-05	0.00120649	6.68336e-07	0.099466	0.0308908	8.0603e-05	0.216274	0.0119327	0.0615061	0.00163351	0.000475515	1.66433e-06	0.000314181	0.329627	3.31789	0.000475357	0.147208	1.29943	0.00237483	5.961	4.13662	11.5835	0.918584
34	2064	1.0843	3.71338	0.190012	0.72784	0.228206	20.7204	26.8031	0.00945039	10.6494	18.6305	0.0930306	3.09081e-07	7.00016	0.452888	1.26433	1.03952	172.13	28.4442	42.609	0.147139	1.54482	15.2361	15.5116	45.2428	0.437594	9.3744e-05	0.00121254	6.71686e-07	0.0999645	0.0310456	8.1007e-05	0.217358	0.0119925	0.0618144	0.0016417	0.000477899	1.67268e-06	0.000315755	0.33128	3.33452	0.00047774	0.147946	1.30595	0.00238673	5.99088	4.85569	13.6057	1.12159
35	2065	1.08973	3.73199	0.190965	0.731488	0.22935	23.0557	29.6097	0.0115522	11.7944	20.774	0.107954	4.79034e-07	8.08251	0.523555	1.46023	1.21996	191.574	31.3041	48.0173	0.16635	1.74914	17.2074	20.7691	60.6408	0.575759	0.000112975	0.00144775	1.03151e-06	0.116924	0.0362133	0.000101652	0.285202	0.0142511	0.0740235	0.00197996	0.00057564	2.56872e-06	0.000396852	0.387294	4.46699	0.000597883	0.173187	1.74449	0.00288043	7.00263	4.88003	13.6739	1.12721
36	2066	1.20672	4.2056	0.211355	0.831982	0.253222	23.1713	29.7581	0.0116101	11.8536	20.8781	0.108495	4.81436e-07	8.12302	0.526179	1.46755	1.22607	192.535	31.461	48.258	0.167184	1.75791	17.2936	20.8732	60.9448	0.578645	0.000113541	0.001455	1.03668e-06	0.11751	0.0363948	0.000102162	0.286632	0.0143225	0.0743946	0.00198989	0.000578526	2.5816e-06	0.000398841	0.389235	4.48938	0.00060088	0.174055	1.75323	0.00289487	7.03773	5.67363	15.9107	1.37778
37	2067	1.21277	4.22668	0.212414	0.836152	0.254491	25.684	32.816	0.0141422	13.0845	23.2074	0.126239	7.31739e-07	9.35686	0.606855	1.69095	1.4351	213.545	34.5047	54.4017	0.188873	1.98882	19.5356	20.9778	61.2503	0.581545	0.00011411	0.0014623	1.04187e-06	0.118099	0.0365772	0.000102674	0.288068	0.0143943	0.0747675	0.00199986	0.000581426	2.59454e-06	0.00040084	0.391186	4.51189	0.000603892	0.174928	1.76202	0.00290938	7.07301	5.70207	15.9905	1.38468
38	2068	1.21885	4.24786	0.213479	0.840344	0.255767	25.8127	32.9805	0.014213	13.1501	23.3238	0.126872	7.35407e-07	9.40376	0.609897	1.69942	1.44229	214.616	34.6777	54.6744	0.18982	1.99878	19.6335	27.8224	81.3321	0.772796	0.000137281	0.0017428	1.54299e-06	0.137933	0.0426011	0.000128324	0.381772	0.017073	0.090446	0.00240771	0.000699142	3.84349e-06	0.000501725	0.456634	5.99246	0.000752675	0.204459	2.34266	0.00350518	8.25496	5.73065	16.0706	1.39162
39	2069	1.35015	4.80011	0.236387	0.958844	0.282534	25.9421	33.1458	0.0142843	13.216	23.4407	0.127508	7.39093e-07	9.4509	0.612954	1.70794	1.44952	215.691	34.8515	54.9485	0.190771	2.0088	19.7319	27.9619	81.7398	0.77667	0.000137969	0.00175154	1.55072e-06	0.138625	0.0428146	0.000128967	0.383685	0.0171586	0.0908994	0.00241978	0.000702647	3.86275e-06	0.00050424	0.458923	6.0225	0.000756448	0.205484	2.3544	0.00352275	8.29634	6.6053	18.542	1.6927
40	2070	1.35691	4.82418	0.237572	0.963651	0.28395	28.6587	36.4758	0.0173399	14.5413	25.9702	0.148755	1.10406e-06	10.8615	0.705322	1.96343	1.69219	238.418	38.1017	61.9656	0.215381	2.27102	22.2953	35.9031	105.139	1.04114	0.0001657	0.00208367	2.23129e-06	0.161764	0.0498231	0.000160596	0.513016	0.0203119	0.111218	0.00290826	0.000843474	5.56094e-06	0.000628742	0.535192	7.76099	0.000939323	0.239932	3.0628	0.00423694	9.67361	6.63841	18.6349	1.70118
41	2071	1.36372	4.84836	0.238762	0.968481	0.285373	24.3584	30.9658	0.0144279	12.3409	22.0528	0.128789	7.46521e-07	10.9159	0.708857	1.97327	1.70068	239.613	38.2927	62.2762	0.216461	2.2824	22.407	36.0831	105.666	1.04636	0.000166531	0.00209411	2.24248e-06	0.162574	0.0500728	0.000161401	0.515588	0.0204137	0.111775	0.00292283	0.000847702	5.58881e-06	0.000631894	0.537874	7.79989	0.000944032	0.241135	3.07816	0.00425818	9.7221	7.59243	21.3383	2.05311
42	2072	1.51112	5.49501	0.264503	1.10872	0.315393	31.7253	40.2496	0.0210843	16.0297	28.8198	0.174861	1.63191e-06	12.5174	0.813879	2.26342	1.9802	263.956	41.7409	70.2544	0.244247	2.57865	25.299	36.264	106.196	1.05161	0.000167366	0.00210461	2.25372e-06	0.163389	0.0503238	0.00016221	0.518172	0.020516	0.112336	0.00293748	0.000851951	5.61683e-06	0.000635061	0.540571	7.83899	0.000948764	0.242344	3.09359	0.00427952	9.77083	5.92866	16.6532	1.65067
43	2073	1.5187	5.52256	0.265829	1.11428	0.316974	31.8843	40.4513	0.02119	16.11	28.9643	0.175737	1.64009e-06	12.5802	0.817958	2.27477	1.99013	265.279	41.9501	70.6066	0.245471	2.59158	25.4258	45.2153	132.732	1.42035	0.000200663	0.00249893	3.16762e-06	0.190641	0.0585622	0.000201312	0.6982	0.0242366	0.139146	0.00352443	0.00102098	7.90015e-06	0.000789057	0.630273	9.83259	0.00117415	0.282877	3.94952	0.00513842	11.3907	7.66873	21.5528	2.07374
44	2074	1.68343	6.27915	0.294608	1.27735	0.350479	32.0441	40.6541	0.0212962	16.1908	29.1095	0.176618	1.64831e-06	12.6433	0.822058	2.28617	2.00011	266.609	42.1604	70.9605	0.246701	2.60457	25.5532	45.4419	133.398	1.42747	0.000201669	0.00251146	3.1835e-06	0.191597	0.0588557	0.000202321	0.7017	0.024358	0.139844	0.0035421	0.00102609	7.93975e-06	0.000793012	0.633432	9.88188	0.00118004	0.284295	3.96932	0.00516418	11.4478	8.70986	24.5131	2.48034
45	2075	1.69187	6.31062	0.296084	1.28375	0.352235	35.2068	44.5289	0.0256821	17.706	32.034	0.207089	2.39018e-06	14.4674	0.941847	2.61676	2.32276	292.697	45.8319	80.0808	0.278232	2.94092	28.8105	55.1642	162.473	1.94033	0.00024138	0.00297616	4.38841e-06	0.224016	0.0686599	0.00025031	0.951754	0.028714	0.175453	0.0042426	0.00122759	1.09539e-05	0.00098206	0.739952	12.101	0.00145584	0.332378	4.99018	0.0061901	13.372	8.75352	24.6359	2.49277
46	2076	1.87606	7.1995	0.328259	1.4716	0.389631	35.3833	44.7522	0.0258109	17.7947	32.1946	0.208127	2.40216e-06	14.5399	0.946568	2.62988	2.3344	294.164	46.0617	80.4822	0.279627	2.95566	28.9549	55.4407	163.288	1.95005	0.000242589	0.00299108	4.4104e-06	0.225139	0.0690041	0.000251565	0.956524	0.028858	0.176333	0.00426387	0.00123374	1.10088e-05	0.000986983	0.743661	12.1617	0.00146313	0.334044	5.01519	0.00622113	13.439	9.87984	27.8518	2.95431
47	2077	1.18007	4.5286	0.20648	0.925657	0.245084	24.2789	30.6031	0.0194199	12.1449	22.1001	0.153095	2.15271e-06	10.3919	0.677383	1.88017	1.6923	201.451	31.2608	56.8673	0.197298	2.08769	20.3947	34.873	102.71	1.22661	0.000152592	0.00188144	2.77421e-06	0.141616	0.0434046	0.000158238	0.601668	0.0181521	0.110916	0.00268204	0.000776041	6.92471e-06	0.000620827	0.467774	7.64988	0.000920334	0.210119	3.15463	0.00391319	8.45333	6.21457	17.5192	1.85831
48	2078	1.18598	4.5513	0.207515	0.930297	0.246312	24.4006	30.7565	0.0195172	12.2057	22.2109	0.153862	2.1635e-06	10.444	0.680778	1.88959	1.70078	202.461	31.4175	57.1523	0.198287	2.09816	20.4969	41.4837	122.611	1.64203	0.000182325	0.00222519	3.76239e-06	0.166261	0.050878	0.000195205	0.804097	0.0213523	0.14097	0.00320695	0.000926842	9.39965e-06	0.000766468	0.548578	9.18903	0.00113219	0.246505	3.90199	0.00468257	9.91372	6.24572	17.607	1.86762
49	2079	1.31561	5.21085	0.230139	1.06549	0.272567	24.5229	30.9107	0.0196151	12.2669	22.3222	0.154633	2.17434e-06	10.4964	0.684191	1.89906	1.7093	203.475	31.5749	57.4388	0.199281	2.10867	20.5997	41.6916	123.226	1.65026	0.000183239	0.00223634	3.78125e-06	0.167094	0.0511331	0.000196184	0.808127	0.0214593	0.141676	0.00322302	0.000931488	9.44677e-06	0.00077031	0.551328	9.23509	0.00113786	0.247741	3.92155	0.00470604	9.96341	7.00982	19.7999	2.19399
0	2080	1.32221	5.23697	0.231292	1.07083	0.273934	207.392	261.413	0.165886	103.742	188.78	1.30774	1.83885e-05	102.713	6.72624	18.5957	17.2209	1867.78	287.594	546.437	1.90458	20.1886	194.93	410.709	1218.01	18.1818	0.00183918	0.022214	4.25596e-05	1.6608	0.507908	0.00203102	8.8929	0.211966	1.53446	0.0323731	0.00934523	0.000106424	0.00797978	5.47262	91.8746	0.0117477	2.45853	40.183	0.0473048	98.9122	59.2824	167.448	18.5547
1	2081	12.8851	52.8449	2.25305	10.7547	2.66279	226.962	284.905	0.198802	112.819	206.368	1.54038	2.60271e-05	117.105	7.68089	21.2081	19.9094	2108.79	324.437	617.432	2.14772	22.7877	220.301	412.768	1224.12	18.2729	0.00184839	0.0223254	4.27729e-05	1.66913	0.510454	0.0020412	8.93748	0.213029	1.54215	0.0325353	0.00939207	0.000106957	0.00801978	5.50006	92.3352	0.0118066	2.47085	40.3844	0.0475419	99.408	66.2004	187.43	21.6193
2	2082	14.3069	60.9571	2.49999	12.2813	2.94869	228.1	286.334	0.199799	113.385	207.402	1.5481	2.61575e-05	117.692	7.71939	21.3144	20.0092	2119.36	326.063	620.527	2.15849	22.9019	221.405	476.982	1418.77	23.3858	0.0022008	0.0263074	5.65367e-05	1.98711	0.608029	0.00250487	11.4288	0.249588	2.00877	0.0387669	0.0111777	0.000141502	0.00984638	6.53791	107.705	0.01445	2.9342	48.4674	0.0566908	118.197	73.5933	208.955	25.0033
3	2083	14.3786	61.2626	2.51252	12.3428	2.96347	249.264	311.284	0.238723	122.987	225.99	1.82731	3.66314e-05	133.972	8.80105	24.2702	23.0786	2211.81	336.208	701.412	2.43363	25.8435	245.536	545.267	1625.74	29.305	0.00261561	0.0309532	7.39668e-05	2.38834	0.732173	0.0030665	14.3141	0.291976	2.64554	0.0461084	0.0132786	0.000185288	0.0120586	7.84476	124.182	0.017644	3.51437	57.4024	0.0674784	141.88	73.9622	210.002	25.1286
4	2084	15.9746	70.94	2.78851	14.0724	3.28276	250.514	312.845	0.239919	123.603	227.123	1.83647	3.6815e-05	134.643	8.84517	24.3919	23.1943	2222.89	337.894	704.928	2.44583	25.973	246.767	548	1633.89	29.4518	0.00262872	0.0311083	7.43376e-05	2.40031	0.735843	0.00308187	14.3858	0.293439	2.6588	0.0463395	0.0133451	0.000186217	0.0121191	7.88408	124.804	0.0177324	3.53199	57.6901	0.0678167	142.591	81.8823	233.194	28.8555
5	2085	16.0546	71.2956	2.80249	14.1429	3.29921	273.455	339.26	0.285812	133.74	246.691	2.17189	5.10494e-05	153.042	10.0697	27.7334	26.6909	2401.94	363.396	797.11	2.75727	29.3026	275.359	620.744	1853.75	36.2206	0.00311832	0.0365599	9.64268e-05	2.91673	0.897104	0.00376491	17.6872	0.342916	3.53639	0.0550126	0.0158233	0.000241717	0.0148067	9.56325	142.429	0.0216049	4.27296	67.5057	0.080572	173.054	82.2928	234.363	29.0002
6	2086	17.8487	82.8787	3.11098	16.1012	3.65595	298.031	366.991	0.339508	144.357	267.129	2.55899	7.0464e-05	173.718	11.4479	31.4895	30.6467	2587.81	390.162	901.674	3.10816	33.0536	306.628	623.856	1863.04	36.4021	0.00313395	0.0367432	9.69101e-05	2.93135	0.901601	0.00378378	17.7758	0.344635	3.55412	0.0552883	0.0159026	0.000242928	0.0148809	9.61119	143.143	0.0217132	4.29438	67.844	0.0809759	173.922	90.7605	259.239	33.0787
7	2087	19.859	96.717	3.45413	18.3084	4.05278	299.525	368.83	0.341199	145.08	268.468	2.57182	7.04898e-05	174.589	11.5053	31.6474	30.8004	2600.78	392.117	906.193	3.12374	33.2193	308.165	701.12	2095.06	44.0376	0.00371041	0.0431517	0.000124787	3.60519	1.11405	0.0046135	21.5032	0.402579	4.76836	0.0655096	0.0188185	0.000312948	0.0181401	11.7994	161.854	0.0264005	5.25404	78.5144	0.0960223	213.661	99.7545	285.679	37.4957
8	2088	2.37182	11.5512	0.412537	2.18662	0.484035	38.7191	47.2956	0.048026	18.5647	34.446	0.357554	1.14104e-05	23.5212	1.55241	4.26485	4.19379	332.07	49.9485	121.654	0.418449	4.45249	40.6833	92.9948	277.711	6.24055	0.000520982	0.00602598	1.89727e-05	0.533595	0.165854	0.000667278	3.04768	0.0559643	0.765932	0.0092057	0.00264094	4.75905e-05	0.00262225	1.74356	21.5636	0.00380717	0.773233	10.6879	0.0135045	31.5957	11.914	34.1195	4.47822
9	2089	2.64138	13.4765	0.458136	2.48087	0.536798	38.9132	47.5326	0.0482667	18.6578	34.6186	0.359346	1.14676e-05	23.6391	1.56019	4.28623	4.21481	333.735	50.1989	122.264	0.420547	4.47481	40.8872	93.461	279.103	6.27183	0.000523594	0.00605618	1.90678e-05	0.536269	0.166685	0.000670623	3.06295	0.0562448	0.769772	0.00925184	0.00265418	4.7829e-05	0.00263539	1.7523	21.6717	0.00382625	0.777109	10.7414	0.0135721	31.7541	13.0537	37.462	5.04689
10	2090	2.65462	13.5441	0.460432	2.49331	0.539489	42.2355	51.1629	0.0570092	20.0424	37.2709	0.416648	1.54948e-05	26.7685	1.7694	4.85497	4.81944	357.638	53.7233	137.777	0.474064	5.04663	45.3063	103.679	308.942	7.38522	0.00061734	0.00712944	2.42562e-05	0.676506	0.211698	0.000814807	3.60802	0.0660018	1.04702	0.0109174	0.00312765	6.08428e-05	0.00319917	2.20756	24.0996	0.0046344	0.974642	12.186	0.0160289	40.0359	13.1192	37.6498	5.07218
11	2091	2.95946	15.7559	0.511442	2.82086	0.598581	45.7298	54.9341	0.0671492	21.4789	40.0159	0.478312	2.07774e-05	30.2807	2.00449	5.49339	5.50025	382.309	57.4081	154.759	0.534423	5.6913	50.0711	104.198	310.491	7.42223	0.000620435	0.00716518	2.43778e-05	0.679897	0.212759	0.000818891	3.6261	0.0663327	1.05227	0.0109722	0.00314332	6.11478e-05	0.0032152	2.21863	24.2204	0.00465763	0.979528	12.2471	0.0161093	40.2366	14.334	41.1912	5.68583
12	2092	3.30436	18.251	0.568367	3.18078	0.664512	45.959	55.2095	0.0674858	21.5866	40.2165	0.480709	2.08815e-05	30.4325	2.01454	5.52092	5.52782	384.226	57.6959	155.534	0.537102	5.71983	50.322	114.97	341.446	8.64402	0.000729961	0.00846007	3.08517e-05	0.868599	0.273813	0.000993291	4.22566	0.0782159	1.4093	0.0129203	0.00369602	7.73722e-05	0.00389537	2.83161	26.7493	0.00563113	1.24432	13.7805	0.0189858	51.3949	15.6225	44.9089	6.34247
13	2093	3.32092	18.3425	0.571216	3.19672	0.667843	49.6305	59.1319	0.0792721	23.0793	43.062	0.546124	2.77997e-05	34.3933	2.27996	6.24096	6.29733	409.765	61.5634	174.062	0.605541	6.4505	55.4673	126.251	373.375	9.96981	0.000857028	0.0100304	3.8863e-05	1.12322	0.356786	0.00120286	4.87839	0.0928249	1.84571	0.0151829	0.00433669	9.74313e-05	0.00471049	3.65952	29.368	0.00679609	1.60057	15.3961	0.0223305	66.4733	15.7099	45.1568	6.37832
14	2094	3.71433	21.1382	0.635144	3.59209	0.741877	49.8793	59.4283	0.0796695	23.1949	43.2779	0.548862	2.79391e-05	34.5657	2.29139	6.27224	6.3289	411.819	61.872	174.935	0.608576	6.48283	55.7454	126.884	375.247	10.0198	0.000861324	0.0100807	3.90578e-05	1.12885	0.358575	0.00120889	4.90284	0.0932902	1.85496	0.015259	0.00435843	9.79197e-05	0.0047341	3.67786	29.5152	0.00683015	1.60859	15.4733	0.0224424	66.8065	17.0859	49.0642	7.08299
15	2095	3.73295	21.2441	0.638328	3.61009	0.745596	53.713	63.4918	0.093331	24.7403	46.2169	0.616897	3.69436e-05	39.0319	2.59098	7.08421	7.19775	438.205	65.9274	195.005	0.686207	7.31122	61.285	138.741	408.317	11.4578	0.00100936	0.0120159	4.89904e-05	1.47643	0.472554	0.00146156	5.61398	0.111605	2.37426	0.017898	0.00510425	0.000122768	0.00571421	4.80924	32.2387	0.00822893	2.09385	17.18	0.0263473	87.4208	17.1715	49.3102	7.1185
16	2096	4.18333	24.347	0.710252	4.04247	0.82887	57.6698	67.6618	0.109043	26.3259	49.2251	0.685794	4.85368e-05	44.0427	2.92741	7.99523	8.17304	465.27	70.1548	216.498	0.773856	8.246	67.2042	139.436	410.363	11.5152	0.00101442	0.0120761	4.9236e-05	1.48383	0.474922	0.00146889	5.64212	0.112165	2.38616	0.0179877	0.00512984	0.000123383	0.00574286	4.83335	32.4003	0.00827018	2.10434	17.2661	0.0264794	87.859	18.6423	53.3932	7.87237
17	2097	4.69834	27.7466	0.790943	4.51125	0.922248	57.9588	68.001	0.109589	26.4579	49.4719	0.689231	4.87801e-05	44.2634	2.94208	8.0353	8.21401	467.602	70.5065	217.583	0.777735	8.28733	67.541	151.88	444.585	13.0674	0.00118693	0.0144887	6.15128e-05	1.96091	0.632219	0.00177295	6.41435	0.13546	2.99001	0.0210662	0.00599848	0.000154071	0.00691941	6.38804	35.2307	0.00994689	2.76934	19.0652	0.0310388	116.196	20.2014	57.6352	8.67211
18	2098	4.72189	27.8857	0.794907	4.53386	0.926871	62.033	72.3131	0.1277	28.0971	52.5685	0.759371	6.3698e-05	49.9137	3.32173	9.06259	9.31344	495.442	74.9317	240.582	0.877226	9.3478	73.883	164.86	479.786	14.7273	0.00138728	0.0175176	7.65687e-05	2.61539	0.849015	0.00213636	7.24673	0.165353	3.67652	0.0246447	0.007007	0.000191679	0.00832235	8.52334	38.1557	0.0119433	3.68061	20.9478	0.0363424	155.126	20.3027	57.924	8.71558
19	2099	5.31613	31.6038	0.886116	5.04315	1.03233	62.344	72.6756	0.12834	28.2379	52.832	0.763177	6.40173e-05	50.1638	3.33838	9.10802	9.36012	497.925	75.3073	241.788	0.881623	9.39465	74.2534	165.686	482.191	14.8011	0.00139424	0.0176054	7.69525e-05	2.6285	0.853271	0.00214707	7.28305	0.166182	3.69495	0.0247682	0.00704212	0.00019264	0.00836407	8.56607	38.347	0.0120032	3.69906	21.0528	0.0365246	155.903	21.9586	62.3503	9.56552
20	2100	5.34278	31.7622	0.890558	5.06843	1.0375	66.5418	77.1339	0.149165	29.9331	56.0217	0.834609	8.31123e-05	56.5358	3.7668	10.2665	10.5988	526.552	79.9397	266.313	0.994597	10.5981	81.0406	179.275	518.541	16.5778	0.00162879	0.0214734	9.54611e-05	3.53419	1.15445	0.00258275	8.18348	0.205236	4.46852	0.0289605	0.00822299	0.000238843	0.0100424	11.5242	41.3831	0.0143881	4.95913	23.0283	0.0427405	209.845	22.0687	62.6628	9.61346
21	2101	6.03134	35.816	0.993955	5.62278	1.15688	70.8489	81.7197	0.17294	31.678	59.2934	0.907024	0.00010731	63.6871	4.24788	11.5667	11.9866	555.829	84.7653	292.253	1.12229	11.9574	88.2615	180.174	521.141	16.6609	0.00163695	0.0215811	9.59396e-05	3.5519	1.16024	0.00259569	8.2245	0.206265	4.49092	0.0291056	0.00826421	0.00024004	0.0100928	11.5819	41.5906	0.0144602	4.98399	23.1437	0.0429547	210.897	23.8222	67.2789	10.5139
22	2102	6.82858	40.2029	1.11096	6.22467	1.29169	71.204	82.1293	0.173807	31.8368	59.5906	0.911571	0.000107847	64.0063	4.26917	11.6246	12.0467	558.616	85.1902	293.718	1.12791	12.0173	88.7039	194.386	558.627	18.5555	0.00191477	0.0265847	0.000118638	4.80897	1.57961	0.00311703	9.19813	0.2579	5.35267	0.0340713	0.0096645	0.000296671	0.0120971	15.6915	44.7404	0.0173039	6.73194	25.2115	0.0503146	285.85	25.6643	72.067	11.4603
23	2103	6.86281	40.4045	1.11653	6.25587	1.29816	75.6494	86.8695	0.201033	33.6429	62.9665	0.985388	0.000138516	72.0744	4.81214	13.0914	13.6091	588.7	90.2433	321.213	1.27301	13.561	96.4194	209.159	597.03	20.5582	0.00224631	0.033102	0.000146274	6.54919	2.16166	0.00373656	10.2464	0.326549	6.29862	0.0399933	0.0113392	0.000365584	0.0144744	21.3852	47.9902	0.0206714	9.15073	27.3593	0.0590813	389.707	25.7929	72.4282	11.5177
24	2104	7.79451	45.1676	1.25009	6.91466	1.45159	76.0286	87.305	0.20204	33.8116	63.2821	0.990328	0.00013921	72.4357	4.83626	13.157	13.6773	591.651	90.6957	322.823	1.27939	13.6289	96.9027	210.208	600.022	20.6612	0.00225757	0.0332679	0.000147007	6.58202	2.1725	0.00375529	10.2978	0.328186	6.33019	0.0401938	0.011396	0.000367417	0.0145469	21.4924	48.2308	0.020775	9.1966	27.4964	0.0593775	391.66	27.7319	77.4182	12.5141
25	2105	7.83358	45.394	1.25635	6.94932	1.45886	80.6219	92.2046	0.23317	35.6822	66.7695	1.06562	0.000177902	81.5405	5.44917	14.8121	15.4357	622.553	95.9887	351.888	1.44431	15.3824	105.143	225.625	639.544	22.7847	0.00266053	0.0418924	0.000180751	8.81527	2.91946	0.00449372	11.4281	0.420753	7.36632	0.0473817	0.0134379	0.000451524	0.0173753	28.8133	51.5982	0.0247749	12.31	29.7361	0.0699973	525.161	27.8709	77.8063	12.5769
26	2106	8.92709	50.5597	1.40938	7.67299	1.63399	85.3503	97.2439	0.26854	37.6115	70.3587	1.14209	0.000226258	91.7673	6.13774	16.671	17.4045	654.126	101.508	382.381	1.63091	17.3649	113.898	226.756	642.75	22.8989	0.00267387	0.0421024	0.000181657	8.85946	2.9341	0.00451625	11.4854	0.422862	7.40324	0.0476192	0.0135053	0.000453788	0.0174624	28.9578	51.8569	0.0248991	12.3717	29.8851	0.0703482	527.793	29.9052	83.0065	13.6225
27	2107	10.2095	56.1314	1.58457	8.46726	1.83355	85.7781	97.7314	0.269886	37.8	70.7114	1.14781	0.000227392	92.2273	6.16851	16.7545	17.4917	657.405	102.017	384.298	1.63908	17.452	114.468	242.827	683.403	25.1466	0.00317052	0.0536259	0.000222779	11.5859	3.8445	0.00539462	12.7006	0.548648	8.53108	0.0564602	0.0160318	0.000556238	0.0208206	37.9219	55.3439	0.0296404	16.1944	32.2179	0.0833762	691.162	32.0215	88.3996	14.7102
28	2108	10.2606	56.4128	1.59251	8.5097	1.84274	90.6775	102.941	0.31024	39.8017	74.4299	1.22592	0.00028787	103.776	6.94613	18.8535	19.7072	689.814	107.803	416.374	1.85132	19.7055	123.816	259.479	724.991	27.5105	0.00378841	0.0690764	0.000272545	14.7849	4.90925	0.00643203	13.9974	0.719828	9.74589	0.0674304	0.0191889	0.000680178	0.0247798	48.483	58.9341	0.0352201	20.7175	34.6328	0.0994912	883.457	32.182	88.8427	14.784
29	2109	11.7782	62.4532	1.79497	9.38994	2.07205	91.132	103.457	0.311795	40.0012	74.803	1.23207	0.000289313	104.296	6.98095	18.948	19.806	693.271	108.343	418.461	1.8606	19.8043	124.436	260.78	728.625	27.6484	0.0038074	0.0694226	0.000273912	14.859	4.93386	0.00646427	14.0676	0.723436	9.79474	0.0677684	0.0192851	0.000683587	0.0249041	48.726	59.2295	0.0353967	20.8213	34.8064	0.0999899	887.886	34.3928	94.4617	15.92
30	2110	13.5722	68.9738	2.02881	10.3656	2.33521	96.2174	108.843	0.357808	42.0804	78.6625	1.31194	0.000364797	117.343	7.85941	21.319	22.2992	726.525	114.415	452.123	2.10207	22.3668	134.417	278.101	771.355	30.1441	0.00459113	0.0903938	0.000334335	18.5323	6.15054	0.00769288	15.456	0.958802	11.1032	0.0816399	0.0233086	0.000834027	0.0295848	60.9218	62.9416	0.0419806	26.0766	37.3156	0.120298	1109.66	36.689	100.285	17.0992
31	2111	13.6402	69.3195	2.03898	10.4176	2.34692	101.48	114.387	0.40999	44.2323	82.657	1.3933	0.00045763	132.014	8.84714	23.9849	25.0913	760.465	120.757	487.198	2.37553	25.2668	145.026	296.008	815.009	32.7633	0.00559418	0.118892	0.000407204	22.638	7.5009	0.00913729	16.9332	1.2822	12.4988	0.0993324	0.0284822	0.00101543	0.035078	74.6572	66.7573	0.0496913	32.0451	39.9066	0.146108	1358.99	36.8729	100.788	17.1849
32	2112	15.7794	76.4028	2.31167	11.5105	2.6516	106.926	120.094	0.46918	46.4588	86.7901	1.47628	0.000571978	149.942	10.0822	27.2508	28.6575	795.287	127.478	524.001	2.69253	28.6315	156.425	314.496	859.566	35.5108	0.00689496	0.157818	0.000494935	27.1366	8.96584	0.0108312	18.5041	1.72811	13.9807	0.122194	0.0352217	0.0012338	0.0415084	89.8638	70.676	0.0586977	38.7278	42.5778	0.179345	1634.37	39.2683	106.853	18.4137
33	2113	18.2797	84.0429	2.62957	12.7203	3.004	112.56	125.973	0.536341	48.762	91.0657	1.56105	0.000712069	168.841	11.3604	30.6862	32.2611	830.651	134.414	562.043	3.03556	32.2698	168.379	316.072	863.875	35.6888	0.00692952	0.158609	0.000497415	27.2726	9.01078	0.0108855	18.5968	1.73677	14.0508	0.122806	0.0353982	0.00123998	0.0417165	90.3142	71.0303	0.0589919	38.9219	42.7913	0.180244	1642.56	41.7534	113.14	19.6864
34	2114	21.1706	92.2708	3.00184	14.0518	3.41326	113.125	126.605	0.539029	49.0064	91.5222	1.56887	0.000715638	169.688	11.4174	30.84	32.4228	834.815	135.088	564.861	3.05078	32.4315	169.223	335.23	909.531	38.5847	0.0086462	0.212279	0.00060339	32.1303	10.5704	0.0128768	20.2761	2.35638	15.625	0.15287	0.0443258	0.00150376	0.0492622	106.969	75.0703	0.0695351	46.3534	45.5543	0.223829	1943.18	44.3306	119.659	21.0032
35	2115	24.4874	101.124	3.43974	15.511	3.89051	118.984	132.696	0.615667	51.4004	95.9672	1.65606	0.000887505	191.099	12.8655	34.7318	36.4901	871.065	142.368	604.608	3.43159	36.4722	181.937	354.973	956.072	41.6177	0.0109255	0.281138	0.000730553	37.3349	12.2179	0.0152009	22.0579	3.15052	17.2853	0.192651	0.0562153	0.00182028	0.0580523	125.014	79.2135	0.0817858	54.5105	48.3967	0.28137	2267.98	47.0029	126.424	22.3638
36	2116	24.6101	101.631	3.45698	15.5888	3.91001	132.111	146.604	0.797891	56.8451	106.084	1.84594	0.00134327	215.248	14.4985	39.1207	41.0598	908.027	149.968	645.901	3.84991	40.9137	195.376	375.308	1003.51	44.7901	0.0139809	0.365994	0.00088289	42.8997	13.9538	0.0179083	23.9443	4.12249	19.0327	0.245807	0.0721915	0.00219946	0.0682723	144.466	83.4615	0.0959918	63.4041	51.3196	0.358116	2617.29	49.7738	133.454	23.7682
37	2117	28.4142	111.2	3.9769	17.1904	4.47165	131.324	145.475	0.801891	56.4372	105.322	1.83742	0.00135001	242.497	16.3408	44.0726	46.1962	945.706	157.905	688.777	4.30734	45.7746	209.57	396.244	1051.84	48.1048	0.0181097	0.467891	0.00106508	48.8409	15.7781	0.0210601	25.9379	5.2759	20.8682	0.317434	0.0938213	0.00265296	0.0801455	165.341	87.8161	0.112452	73.0451	54.3242	0.461372	2991.41	50.0233	134.123	23.8873
38	2118	32.7701	121.514	4.59911	18.9437	5.14172	137.824	152.192	0.914854	59.0862	110.245	1.93221	0.00165599	273.258	18.4203	49.6625	51.9726	984.103	166.194	733.272	4.80563	51.0754	224.548	398.23	1057.11	48.346	0.0182004	0.470236	0.00107042	49.0858	15.8572	0.0211657	26.0679	5.30235	20.9728	0.319025	0.0942916	0.00266626	0.0805473	166.17	88.2563	0.113016	73.4112	54.5965	0.463684	3006.4	52.9288	141.521	25.3496
39	2119	37.6828	132.6	5.33386	20.8419	5.92189	138.514	152.955	0.91944	59.3823	110.797	1.9419	0.00166429	274.628	18.5126	49.9114	52.2332	989.035	167.027	736.947	4.82972	51.3314	225.674	419.883	1106.6	51.8235	0.0238452	0.591151	0.00128905	55.4562	17.7791	0.024854	28.1823	6.64794	22.9073	0.416708	0.123907	0.00321048	0.0944133	188.595	92.7418	0.132191	83.8628	57.6995	0.604324	3407.63	55.9243	149.177	26.8495
40	2120	43.2552	144.552	6.21179	22.9042	6.84616	145.282	159.948	1.04905	62.1371	115.919	2.04044	0.0020345	309.545	20.8724	56.256	58.7653	1028.35	175.73	783.333	5.37355	57.1237	241.552	442.156	1157.01	55.4509	0.0315662	0.732412	0.00154964	62.2535	19.7885	0.0291547	30.411	8.18459	24.9324	0.550035	0.164461	0.00385916	0.110549	212.477	97.3386	0.154456	95.0884	60.8871	0.796076	3834.37	59.026	157.134	28.3946
41	2121	43.472	145.276	6.24292	23.019	6.88048	152.298	167.207	1.19731	64.9886	121.225	2.14273	0.0024787	350.242	23.6595	63.6662	66.5138	1068.53	184.913	831.648	5.97236	63.5065	258.408	465.06	1208.35	59.2326	0.0421738	0.896497	0.00185973	69.5143	21.8835	0.034183	32.7585	9.91775	27.0491	0.73288	0.220224	0.00463096	0.129376	237.828	102.049	0.180392	107.1	64.1607	1.0588	4286.89	59.3219	157.922	28.5369
42	2122	49.785	158.247	7.28188	25.2443	7.96068	159.586	174.737	1.36727	67.9406	126.716	2.24937	0.00300996	395.158	26.7025	71.8304	74.8963	1109.33	194.43	881.51	6.61012	70.3271	276.057	488.604	1260.61	63.1741	0.0567982	1.08678	0.00222804	77.2879	24.0608	0.040123	35.2305	11.854	29.2582	0.984599	0.297154	0.00554759	0.151582	264.652	106.877	0.210974	119.91	67.522	1.42015	4765.41	62.5473	166.226	30.1365
43	2123	56.8698	172.281	8.49283	27.6062	9.19968	167.169	182.548	1.56253	70.9969	132.394	2.36106	0.00364331	445.987	30.1457	81.0692	84.3537	1150.87	204.36	933.087	7.29582	77.6908	294.607	491.053	1266.92	63.4908	0.0570829	1.09223	0.00223921	77.6753	24.1814	0.0403242	35.4071	11.9134	29.4048	0.989535	0.298644	0.0055754	0.152342	265.979	107.413	0.212032	120.511	67.8604	1.42726	4789.29	65.8822	174.844	31.7843
44	2124	64.7977	187.508	9.89431	30.0844	10.6063	168.007	183.463	1.57037	71.3528	133.058	2.37289	0.00366157	448.223	30.2968	81.4756	84.7765	1156.64	205.384	937.764	7.33239	78.0802	296.084	515.37	1320.38	67.6194	0.0774022	1.31445	0.00267806	86.0701	26.4475	0.0474546	38.0238	14.0716	31.7183	1.33888	0.405587	0.00666742	0.178967	294.419	112.386	0.248749	134.201	71.3285	1.9283	5296.5	69.4193	184.003	33.5215
45	2125	73.6544	204.085	11.5088	32.6533	12.1907	175.957	191.602	1.79637	74.534	138.955	2.49105	0.004418	506.058	34.214	91.9876	95.5064	1199.13	215.789	991.318	8.07104	86.0554	315.651	540.352	1374.77	71.9189	0.103475	1.56852	0.00319735	95.0644	28.7925	0.0560715	40.7765	16.4456	34.1271	1.78708	0.542624	0.00795937	0.211119	324.364	117.484	0.293221	148.723	74.8883	2.57179	5830.43	72.9888	193.302	35.2766
46	2126	74.0236	205.108	11.5665	32.817	12.2518	184.272	200.04	2.05729	77.8302	145.044	2.61614	0.00531409	571.567	38.6502	103.894	107.627	1242.36	226.628	1046.58	8.86065	94.6371	336.161	566.008	1430.11	76.3931	0.135455	1.85553	0.00382078	104.68	31.2176	0.0666652	43.6695	19.0394	36.6334	2.3371	0.710245	0.00950891	0.250555	355.841	122.706	0.347982	164.096	78.5419	3.3635	6391.56	73.3546	194.271	35.4535
47	2127	83.9624	223.314	13.4305	35.4572	14.0353	192.995	208.788	2.35928	81.2475	151.326	2.74938	0.00637234	645.798	43.6761	117.386	121.325	1286.33	237.913	1103.53	9.70277	103.861	357.635	592.351	1486.41	81.0465	0.173521	2.17672	0.00455656	114.942	33.7239	0.0797928	46.7078	21.857	39.2398	2.99244	0.908939	0.011337	0.299439	388.878	128.057	0.416267	180.339	82.2919	4.31039	6980.41	77.0571	203.963	37.2735
48	2128	95.0652	243.302	15.5693	38.1154	16.0244	202.178	217.859	2.7097	84.7932	157.804	2.89225	0.0076182	729.948	49.3724	132.68	136.817	1331.05	249.656	1162.15	10.5991	113.769	380.096	595.32	1493.86	81.4527	0.174391	2.18764	0.0045794	115.518	33.8929	0.0801927	46.9419	21.9666	39.4365	3.00744	0.913495	0.0113939	0.30094	390.827	128.699	0.418353	181.243	82.7044	4.332	7015.4	80.8759	214.015	39.1534
49	2129	107.485	265.355	18.0237	40.7406	18.2367	203.192	218.951	2.72328	85.2182	158.595	2.90675	0.00765639	733.607	49.6199	133.345	137.503	1337.72	250.907	1167.98	10.6522	114.339	382.002	622.498	1551.42	86.3148	0.218985	2.5464	0.00545014	126.515	36.4946	0.0967513	50.148	25.028	42.1594	3.77632	1.14494	0.0135566	0.362655	425.628	134.208	0.505174	198.468	86.573	5.44871	7635.62	84.8131	224.427	41.0936
0	2130	121.41	289.824	20.843	43.2698	20.6931	1791.9	1922.01	26.3633	748.242	1390.99	25.7644	0.0767937	6980.26	472.164	1268.76	1305.32	11641.2	2214.65	10338	97.6921	1052.09	3412.99	5472.97	13547.5	768.858	2.27363	24.7667	0.0544695	1163.26	329.698	0.991239	450.322	238.344	378.583	39.2222	11.8539	0.135447	3.71265	3888.19	1176.83	5.18824	1822.86	761.927	56.7365	69716.6	747.833	1979.18	362.633
1	2131	1026.77	2451.05	176.271	365.935	175.003	1878.69	2004.54	30.3836	780.608	1449.11	27.1654	0.091263	7885.81	533.494	1433.36	1473.15	12031.8	2322.11	10861.8	106.242	1148.43	3620.18	5713.88	14048.3	813.076	2.76312	28.4483	0.064555	1268.5	353.019	1.21906	480.102	268.109	403.344	47.7029	14.3502	0.160479	4.5645	4208.88	1225.47	6.40647	1983.78	796.268	69.2449	75431.9	751.582	1989.1	364.451
2	2132	1069.64	2364.16	193.479	441.291	198.005	1970.64	2090.22	35.0943	814.288	1508.97	28.6632	0.108876	8892.74	601.804	1616.47	1663.13	12428.6	2433.91	11399.9	115.308	1251.36	3836.14	5961.14	14557.4	859.072	3.31505	32.5029	0.0763419	1381	377.073	1.51556	511.45	299.961	429.1	57.2998	17.1289	0.189721	5.67561	4544.08	1275.32	8.00923	2153.26	831.577	83.5547	81406.5	786.932	2083.23	381.882
3	2133	1182.73	2525.15	219.304	477.794	223.431	2068.12	2179.17	40.6065	849.352	1570.59	30.2566	0.128816	10003.8	677.321	1818.58	1878.01	12831.3	2550.2	11952.3	124.908	1361.11	4060.92	5991.02	14630.4	863.379	3.33167	32.6658	0.0767245	1387.92	378.963	1.52315	514.014	301.465	431.251	57.587	17.2148	0.190672	5.70406	4566.86	1281.72	8.04938	2164.05	835.746	83.9735	81814.6	823.37	2180.42	399.834
4	2134	1303.85	2693.88	247.478	516.064	251.516	2078.49	2190.09	40.81	853.609	1578.47	30.4083	0.129462	10053.9	680.716	1827.7	1887.43	12895.6	2562.98	12012.2	125.534	1367.93	4081.28	6246.12	15150.4	911.514	3.95424	37.1561	0.0905374	1509.13	403.888	1.91514	547.261	335.651	458.205	68.4616	20.2975	0.224927	7.17653	4918.86	1333.08	10.1914	2343.51	872.277	100.409	88089.7	860.864	2280.46	418.279
5	2135	1433.13	2870.3	278.041	556.18	282.542	2182.59	2282.98	47.3177	890.358	1642.22	32.1055	0.152759	11279.3	764.226	2050.74	2131.92	13306.3	2684.63	12582	135.748	1485.39	4316.23	6507.9	15678.8	961.59	4.64507	42.0779	0.106614	1638.69	429.581	2.43572	582.281	372.034	486.242	80.5866	23.6737	0.264779	9.13713	5286.1	1385.72	13.0663	2532.19	909.864	118.899	94638.4	899.47	2383.29	437.217
6	2136	1440.31	2884.68	279.435	558.968	283.958	2293.46	2379.61	54.9792	928.743	1707.84	33.8972	0.179766	12617.6	855.719	2294.48	2408.82	13722.9	2811.31	13166.8	146.556	1610.32	4560.35	6776.4	16215.8	1013.64	5.40427	47.4513	0.125221	1776.8	456.061	3.13247	619.103	410.634	515.376	93.9839	27.3466	0.310895	11.769	5668.7	1439.67	16.9539	2730.2	948.514	139.427	101464	903.978	2395.24	439.409
7	2137	1578.54	3069.64	312.593	601.232	318.443	2411.86	2480.23	64.0182	968.917	1775.38	35.7818	0.210988	14073.1	955.606	2559.8	2722.53	14145.1	2943.31	13766.8	157.993	1743.08	4813.78	7051.69	16761.5	1067.7	6.23169	53.3024	0.146859	1923.71	483.352	4.07249	657.764	451.468	545.62	108.678	31.319	0.364498	15.3291	6066.71	1494.96	22.2465	2937.62	988.233	161.964	108568	943.928	2501.24	458.922
8	2138	205.017	387.661	41.3838	76.7157	42.3833	301.691	307.215	8.87755	120.152	219.245	4.4869	0.0293515	1860.62	126.562	338.555	366.019	1731.87	366.189	1709.24	20.22	223.953	603.356	842.205	2001.87	127.519	0.744269	6.36606	0.0175398	229.755	57.7282	0.48639	78.5587	53.9202	65.1651	12.9797	3.74053	0.0435331	1.8308	724.565	178.547	2.65696	350.849	118.028	19.3439	12966.6	117.06	310.158	56.9134
9	2139	223.458	411.406	45.9212	82.2422	47.4266	303.203	308.755	8.92205	120.754	220.344	4.5094	0.0294986	1869.94	127.196	340.252	367.854	1740.55	368.024	1717.8	20.3213	225.076	606.38	875.901	2068.08	134.221	0.851158	7.12597	0.0205497	248.389	61.0879	0.638801	83.4004	59.0653	68.9115	14.8928	4.25103	0.0509865	2.40954	773.946	185.315	3.52205	376.756	122.899	22.2687	13848.7	122.094	323.416	59.3503
10	2140	242.966	436.02	50.7547	88.0466	53.0467	319.486	321.85	10.4334	126.048	228.895	4.75568	0.0344441	2073.85	141.323	377.495	416.054	1792.3	385.198	1793.2	21.8528	242.962	638.938	910.419	2135.35	141.175	0.965958	7.95236	0.0240658	268.157	64.5524	0.846796	88.4716	64.479	72.7936	16.9675	4.79779	0.0596898	3.20131	825.163	192.254	4.71109	403.802	127.899	25.4158	14764.6	127.267	336.999	61.8436
11	2141	244.184	438.205	51.0091	88.4894	53.3126	336.91	335.519	12.1874	131.612	237.695	5.01233	0.04012	2293.32	156.605	417.625	470.034	1844.69	403.104	1870.46	23.4711	261.916	672.649	945.759	2203.68	148.388	1.0884	8.85246	0.0282191	289.116	68.1273	1.13191	93.7784	70.1602	76.8127	19.2082	5.38085	0.0699666	4.28931	878.199	199.371	6.35088	431.989	133.026	28.7687	15714.3	127.905	338.688	62.1536
12	2142	264.926	463.806	56.1573	94.6241	59.5423	355.476	349.775	14.1924	137.458	246.748	5.27924	0.046622	2528.6	173.079	460.702	529.889	1897.71	421.756	1949.56	25.1788	281.974	707.518	981.922	2273.1	155.868	1.21806	9.83605	0.0331834	311.34	71.82	1.52416	99.3283	76.1061	80.9702	21.6197	6.00009	0.0822469	5.78961	933.014	206.674	8.61841	461.315	138.278	32.3026	16697.8	133.252	352.686	64.7187
13	2143	286.881	490.26	61.5857	101.071	66.3538	375.183	364.633	16.4578	143.599	256.056	5.55627	0.054058	2779.97	190.785	506.79	595.717	1951.36	441.166	2030.45	26.9785	303.173	743.546	986.844	2284.5	156.65	1.22417	9.88535	0.0333498	312.901	72.18	1.5318	99.8262	76.4876	81.376	21.7281	6.03016	0.0826592	5.81863	937.691	207.71	8.66161	463.627	138.972	32.4645	16781.5	138.751	367.044	67.3433
14	2144	310.137	517.547	67.2812	107.842	73.7456	377.064	366.461	16.5403	144.318	257.34	5.58412	0.0543289	2793.91	191.741	509.33	598.703	1961.14	443.378	2040.63	27.1137	304.693	747.273	1024.03	2355.37	164.443	1.36189	10.9609	0.0393883	336.538	76.012	2.03624	105.654	82.737	85.6956	24.3262	6.68979	0.0975941	7.75055	994.607	215.244	11.5839	494.271	144.379	36.2068	17804.6	144.406	381.778	70.0275
15	2145	334.803	545.643	73.2262	114.952	81.7139	398.013	382.014	19.0893	150.8	266.956	5.8725	0.0628643	3062.99	210.818	558.744	670.964	2015.68	463.661	2123.7	29.0178	327.188	784.646	1062.06	2427.38	172.522	1.50721	12.1272	0.0467927	361.511	79.9678	2.6538	111.741	89.2693	90.1594	27.1017	7.38777	0.115906	10.1178	1053.39	222.977	15.1634	526.118	149.917	40.151	18863.1	150.222	396.906	72.7712
16	2146	336.481	548.378	73.5932	115.528	82.1235	420.096	398.207	21.923	157.611	276.836	6.17056	0.0726025	3348.81	231.223	611.323	749.434	2070.83	484.734	2208.49	31.0203	350.918	823.183	1100.97	2500.54	180.898	1.66036	13.3893	0.0559936	387.861	84.0506	3.38788	118.095	96.0961	94.7702	30.0576	8.12544	0.138664	12.9335	1114.1	230.917	19.4158	559.208	155.59	44.3117	19958	150.975	398.895	73.136
17	2147	362.819	577.394	79.7961	123.032	90.7046	443.299	415.059	25.0554	164.769	286.984	6.47792	0.0837038	3651.68	253.009	667.146	834.218	2126.58	506.612	2294.93	33.1246	375.935	862.878	1140.76	2574.89	189.585	1.82158	14.7536	0.0675804	415.637	88.2644	4.24254	124.727	103.232	99.5317	33.1973	8.90445	0.16733	16.2141	1176.78	239.075	24.3593	593.591	161.401	48.7085	21090.3	156.988	414.521	75.9529
18	2148	390.863	607.146	86.1981	130.914	99.8485	467.602	432.594	28.5027	172.3	297.404	6.7941	0.096352	3971.91	276.233	726.295	925.429	2182.9	529.31	2382.95	35.3346	402.294	903.724	1146.48	2587.79	190.535	1.83072	14.8276	0.0679191	417.72	88.7069	4.2638	125.352	103.75	100.031	33.3637	8.94909	0.168169	16.2953	1182.68	240.274	24.4814	596.566	162.21	48.9526	21196	163.172	430.571	78.8296
19	2149	420.625	637.64	92.8011	139.197	109.541	492.977	450.84	32.284	180.231	308.1	7.11849	0.110757	3991.82	277.618	729.935	930.068	2193.84	531.963	2394.89	35.5117	404.311	908.254	1187.39	2663.75	199.596	2.00121	16.3098	0.0827756	447.131	93.0786	5.24892	132.312	111.252	104.972	36.7075	9.77566	0.20494	20.0795	1247.75	248.706	30.1661	632.481	168.195	53.6352	22373	169.528	447.046	81.7667
20	2150	452.117	668.882	99.6066	147.911	119.788	495.448	453.099	32.4458	181.134	309.644	7.15417	0.111312	4331.44	302.444	792.781	1028.3	2251.01	555.61	2484.94	37.8423	432.175	950.469	1229.24	2740.98	209.014	2.18058	17.9145	0.101966	478.118	97.5933	6.3665	139.586	119.109	110.073	40.2439	10.6486	0.252464	24.3768	1314.99	257.388	36.5938	669.839	174.33	58.6174	23590.7	176.059	463.946	84.7644
21	2151	485.343	700.878	106.616	157.058	130.594	522.052	472.144	36.59	189.507	320.67	7.48886	0.127796	4689.21	328.799	859.087	1133.22	2308.72	580.106	2576.57	40.2862	461.437	993.853	1272.07	2819.56	218.82	2.36937	19.6572	0.127041	510.787	102.259	7.62459	147.197	127.356	115.343	43.9776	11.5717	0.314612	29.2203	1384.53	266.345	43.798	708.745	180.623	63.9481	24851.3	182.772	481.279	87.8246
22	2152	520.308	733.632	113.831	166.64	141.964	549.789	491.889	41.0874	198.281	331.974	7.83271	0.146566	5065.51	356.729	928.916	1244.94	2366.95	605.462	2669.78	42.8476	492.122	1038.41	1315.91	2899.57	229.061	2.56831	21.5588	0.160154	545.275	107.087	9.03369	155.178	136.039	120.788	47.9145	12.5497	0.396751	34.6542	1456.53	275.609	51.8214	749.343	187.086	69.6945	26157.8	189.662	499.022	90.9442
23	2153	557.011	767.148	121.251	176.656	153.904	578.687	512.323	45.9482	207.454	343.552	8.18628	0.167941	5460.73	386.287	1002.33	1363.58	2425.67	631.691	2764.55	45.531	524.258	1084.15	1360.79	2981.03	239.741	2.7775	23.6236	0.204288	581.615	112.079	10.5995	163.539	145.168	126.415	52.057	13.5832	0.506334	40.7071	1531.03	285.185	60.6699	791.651	193.72	75.8793	27510.8	196.734	517.175	94.1243
24	2154	595.442	801.428	128.879	187.106	166.415	608.784	533.43	51.1838	217.022	355.404	8.55026	0.192288	5875.31	417.526	1079.41	1489.27	2484.86	658.807	2860.86	48.3414	557.873	1131.06	1406.7	3063.96	250.867	2.99705	25.8565	0.263593	619.84	117.242	12.3292	172.29	154.754	132.231	56.4076	14.6729	0.653723	47.4162	1608.04	295.079	70.3467	835.684	200.529	82.5319	28910.9	203.992	535.726	97.3643
25	2155	635.59	836.475	136.712	197.988	179.501	640.119	555.187	56.807	226.978	367.526	8.92542	0.220031	6309.69	450.507	1160.21	1622.14	2544.46	686.822	2958.7	51.2843	592.996	1179.15	1453.67	3148.37	262.442	3.22704	28.2638	0.343841	659.986	122.579	14.2316	181.444	164.811	138.243	60.9685	15.8194	0.853344	54.83	1687.57	305.296	80.8518	881.456	207.515	89.6913	30358.8	211.438	554.676	100.665
26	2156	677.43	872.286	144.752	209.297	193.164	672.736	577.569	62.832	237.316	379.913	9.31272	0.251659	6764.35	485.297	1244.82	1762.34	2604.43	715.75	3058.03	54.3657	629.659	1228.41	1501.71	3234.27	274.472	3.46755	30.853	0.453074	702.092	128.096	16.3187	191.017	175.357	144.464	65.7419	17.0231	1.12529	63.0135	1769.62	315.843	92.1805	928.975	214.682	97.4095	31855.3	219.075	574.03	104.028
27	2157	721.003	908.868	153	221.028	207.403	706.687	600.538	69.2755	248.023	392.559	9.71327	0.287741	7240	521.99	1333.35	1910.06	2664.74	745.621	3158.86	57.5944	667.912	1278.86	1550.81	3321.69	286.961	3.71861	33.634	0.602494	746.203	133.802	18.6057	201.028	186.412	150.908	70.7294	18.2843	1.49755	72.0538	1854.19	326.725	104.321	978.243	222.034	105.757	33401.1	226.907	593.789	107.453
28	2158	766.358	946.223	161.463	233.171	222.227	742.069	624.111	76.1501	259.112	405.467	10.1274	0.328943	7736.54	560.593	1425.78	2065.24	2725.31	776.423	3261.07	60.9697	707.74	1330.45	1601	3410.64	299.912	3.98019	36.6194	0.807722	792.372	139.706	21.1135	211.501	198.004	157.593	75.9322	19.6031	2.00916	82.0699	1941.25	337.953	117.252	1029.25	229.574	114.83	34997	234.936	613.953	110.943
29	2159	813.546	984.355	170.144	245.734	237.646	778.996	648.308	83.4702	270.595	418.644	10.5557	0.376051	8254.31	601.168	1522.19	2227.95	2786.07	808.185	3364.6	64.4958	749.169	1383.18	1652.27	3501.12	313.327	4.25223	39.8262	1.09058	840.662	145.821	23.8705	222.473	210.169	164.547	81.3509	20.9794	2.71462	93.2239	2030.75	349.535	130.938	1081.99	237.307	124.761	36643.9	243.167	634.524	114.499
30	2160	862.629	1023.26	179.049	258.727	253.667	817.604	673.15	91.252	282.487	432.095	10.9985	0.429995	8793.49	643.763	1622.63	2398.21	2846.94	840.925	3469.37	68.1756	792.21	1437.01	1704.66	3593.18	327.217	4.53473	43.2608	1.45258	891.18	152.154	26.8855	233.963	222.92	171.797	86.9896	22.4146	3.61796	105.522	2122.75	361.477	145.397	1136.5	245.238	135.555	38343	251.605	655.499	118.122
31	2161	913.675	1062.95	188.183	272.161	270.302	858.053	698.661	99.514	294.806	445.825	11.4564	0.491882	9354.26	688.43	1727.13	2576.01	2907.84	874.66	3575.26	72.0121	836.872	1491.93	1758.18	3686.81	341.594	4.82764	46.9314	1.89542	944.07	158.713	30.1691	246	236.27	179.381	92.8529	23.9104	4.72368	118.965	2217.28	373.785	160.646	1192.82	253.373	147.215	40095.9	260.253	676.874	121.815
32	2162	966.766	1103.41	197.552	286.048	287.561	900.533	724.869	108.277	307.571	459.842	11.93	0.563035	9936.79	735.226	1835.75	2761.35	2968.65	909.41	3682.14	76.0086	883.165	1547.89	1812.87	3782.06	356.474	5.13079	50.8477	2.42097	999.518	165.512	33.7351	258.618	250.235	187.351	98.9462	25.4687	6.03688	133.55	2314.42	386.465	176.704	1251.02	261.716	159.74	41904.3	269.119	698.642	125.58
33	2163	1022	1144.64	207.164	300.401	305.454	945.274	751.808	117.566	320.806	474.152	12.4202	0.645038	10541.2	784.212	1948.54	2954.19	3029.25	945.195	3789.88	80.1682	931.094	1604.86	1868.77	3878.95	371.874	5.44393	55.0225	3.03136	1057.77	172.563	37.601	271.864	264.835	195.778	105.275	27.0921	7.56353	149.262	2414.24	399.522	193.599	1311.18	270.277	173.125	43770.5	278.207	720.807	129.419
34	2164	1079.48	1186.62	217.028	315.235	323.994	992.547	779.515	127.409	334.538	488.765	12.9277	0.739792	11167.7	835.452	2065.52	3154.49	3089.51	982.035	3898.29	84.4947	980.665	1662.77	1925.92	3977.52	387.818	5.76662	59.472	3.72911	1119.17	179.887	41.7898	285.799	280.093	204.76	111.848	28.7837	9.31073	166.077	2516.82	412.964	211.358	1373.4	279.065	187.355	45697.4	287.52	743.376	133.332
35	2165	1139.18	1229.38	227.148	330.569	343.193	1042.68	808.034	137.838	348.798	503.689	13.4536	0.849577	11816.3	889.02	2186.74	3362.18	3149.25	1019.95	4007.18	88.9917	1031.88	1721.56	1984.4	4077.79	404.336	6.09818	64.2176	4.51723	1184.17	187.509	46.3322	300.506	296.042	214.433	118.673	30.5475	11.2872	183.952	2622.27	426.799	230.022	1437.79	288.091	202.403	47688.7	297.063	766.355	137.322
36	2166	1201.09	1272.89	237.53	346.423	363.052	1095.62	837.368	148.858	363.589	518.927	13.9977	0.977127	12486.3	944.914	2312.1	3577.03	3208.31	1058.92	4116.31	93.6569	1084.68	1781.13	2044.29	4179.8	421.465	6.43758	69.2881	5.39939	1253.4	195.465	51.2691	316.098	312.718	224.986	125.762	32.3889	13.5038	202.821	2730.74	441.035	249.636	1504.52	297.374	218.231	49749.3	306.843	789.751	141.39
37	2167	1265.14	1317.18	248.182	362.8	383.569	1151.29	867.515	160.474	378.914	534.479	14.5602	1.12573	13176.9	1003.13	2441.47	3798.81	3266.46	1098.9	4225.39	98.487	1139	1841.34	2105.69	4283.62	439.257	6.78334	74.722	6.38021	1327.71	203.8	56.6557	332.727	330.172	236.68	133.128	34.315	15.9745	222.584	2842.39	455.682	270.265	1573.81	306.933	234.774	51885.6	316.865	813.573	145.539
38	2168	1331.28	1362.23	259.109	379.699	404.741	1209.61	898.475	172.688	394.776	550.346	15.1407	1.29933	13887.2	1063.67	2574.68	4027.19	3323.48	1139.86	4334.09	103.478	1194.76	1902.04	2168.68	4389.27	457.731	7.13662	80.5292	7.46364	1407.26	212.551	62.5354	350.52	348.432	249.504	140.782	36.3277	18.7068	243.249	2957.33	470.752	291.943	1645.8	316.777	252.072	54102.9	327.137	837.831	149.771
39	2169	1399.42	1408.06	270.321	397.12	426.559	1270.46	930.24	185.503	411.174	566.528	15.7391	1.50266	14615.9	1126.5	2711.55	4261.8	3379.07	1181.74	4442.05	108.626	1251.85	1963.05	2233.35	4496.82	476.912	7.49903	86.7212	8.6546	1492.2	221.763	68.9667	369.653	367.531	263.43	148.739	38.4296	21.71	264.819	3075.64	486.258	314.714	1720.67	326.912	270.173	56408.1	337.671	862.536	154.089
40	2170	1469.43	1454.64	281.826	415.061	449.014	1333.68	962.804	198.92	428.108	583.024	16.3551	1.74143	15361.6	1191.61	2851.85	4502.21	3432.94	1224.48	4548.83	113.923	1310.16	2024.16	2299.85	4606.33	496.829	7.87277	93.3122	9.95939	1582.73	231.501	76.0288	390.362	387.512	278.418	157.013	40.6235	24.9953	287.298	3197.45	502.217	338.631	1798.65	337.349	289.144	58810.5	348.479	887.704	158.497
41	2171	1541.18	1501.98	293.636	433.518	472.09	1399.08	996.154	212.937	445.577	599.832	16.9882	2.02249	16122.6	1258.97	2995.31	4747.89	3484.72	1268.02	4653.93	119.364	1369.57	2085.14	2368.33	4717.86	517.519	8.26091	100.32	11.3862	1679.09	241.85	83.8301	412.974	408.43	294.401	165.628	42.9129	28.577	310.68	3322.92	518.649	363.767	1880.05	348.098	309.069	61322.7	359.563	913.337	162.999
42	2172	1614.67	1550.09	305.753	452.484	495.769	1406.09	1001.15	214.005	447.81	602.839	17.0733	2.03263	16897.1	1328.54	3141.62	4998.23	3534	1312.27	4756.8	124.939	1429.9	2145.72	2439.04	4831.52	539.03	8.66766	107.766	12.9459	1781.59	252.928	92.5196	437.941	430.356	311.277	174.612	45.3021	32.4733	334.954	3452.23	535.582	390.212	1965.31	359.174	330.065	63961.8	370.925	939.44	167.594
43	2173	1689.92	1598.95	318.18	471.948	520.055	1473.76	1035.44	228.694	465.899	620.042	17.7261	2.36587	17682.8	1400.22	3290.43	5252.66	3580.32	1357.11	4856.8	130.637	1490.98	2205.62	2512.3	4947.43	561.424	9.09892	115.681	14.6528	1890.63	264.899	102.303	465.888	453.386	328.901	184.004	47.7967	36.708	360.099	3585.65	553.051	418.09	2054.99	370.595	352.29	66751.3	382.567	966.018	172.288
44	2174	1766.93	1648.57	330.918	491.914	544.958	1543.37	1070.51	243.995	484.525	637.558	18.396	2.75168	18477.4	1473.91	3441.33	5510.51	3623.16	1402.4	4953.23	136.444	1552.58	2264.56	2588.52	5065.73	584.786	9.56284	124.101	16.5268	2006.74	277.987	113.465	497.68	477.65	347.059	193.855	50.4037	41.3131	386.079	3723.5	571.101	447.567	2149.89	382.384	375.957	69723.7	394.489	993.074	177.082
45	2175	1845.72	1698.95	343.97	512.383	570.483	1614.93	1106.39	259.918	503.695	655.39	19.0835	3.19206	19277.8	1549.47	3593.85	5771	3661.93	1447.99	5045.28	142.343	1614.48	2322.18	2668.32	5186.64	609.228	10.0708	133.078	18.5943	2130.62	292.504	126.4	534.523	503.323	365.444	204.237	53.1328	46.3314	412.838	3866.22	589.795	478.865	2251.08	394.573	401.362	72923.4	406.691	1020.61	181.981
46	2176	1926.28	1750.08	357.337	533.356	596.638	1688.41	1143.08	276.475	523.411	673.539	19.7892	3.68933	20080.9	1626.76	3747.43	6033.22	3695.94	1493.68	5132	148.315	1676.36	2378.08	2751.66	5310.18	634.754	10.6231	142.614	20.8565	2262.42	308.476	141.08	576.345	530.406	384.075	215.16	55.9859	51.7667	440.396	4013.86	609.129	511.987	2358.62	407.163	428.575	76348.8	419.173	1048.63	186.991
47	2177	2008.62	1801.96	371.019	554.832	623.431	1763.81	1180.6	293.678	543.68	692.006	20.5139	4.24611	20882.6	1705.57	3901.44	6296.13	3724.42	1539.28	5212.33	154.338	1737.92	2431.81	2838.52	5436.37	661.365	11.2198	152.706	23.3135	2402.34	325.932	157.451	623.015	558.894	402.974	226.633	58.9652	57.6222	468.773	4166.44	629.095	546.922	2472.5	420.154	457.687	79995.5	431.93	1077.13	192.118
48	2178	2092.73	1854.58	385.016	576.809	650.867	1841.09	1218.96	311.54	564.505	710.794	21.2584	4.86545	21678.7	1785.7	4055.14	6558.51	3746.48	1584.52	5285.06	160.387	1798.76	2482.85	2928.8	5565.2	689.056	11.8609	163.348	25.9643	2550.58	344.904	175.429	674.318	588.771	422.172	238.668	62.073	63.8995	497.994	4323.98	649.679	583.643	2592.72	433.544	488.811	83856.3	444.966	1106.12	197.362
49	2179	2178.6	1907.91	399.328	599.284	678.956	1920.23	1258.2	330.076	585.89	729.904	22.0237	5.55089	24615.4	2026.61	4603.92	7445.93	4257.73	1799.2	6005.02	182.075	2042.53	2820.46	3022.36	5696.67	717.811	12.5459	174.529	28.8062	2707.38	365.428	194.886	729.92	620.004	441.71	251.278	65.3116	70.598	528.087	4486.44	670.855	622.104	2719.19	447.325	522.096	87919.6	458.284	1135.6	202.726
[truncated: 7 more columns]

## Sheet: Bridgeport_1
																																					0.273005	0.301122	0.29001	0.306287	0.294984	0.284099	0.273615	0.263518	0.27847	0.268194	0.258297	0.248766	0.239586
																																					0	1	2	3	4	5	6	7	8	9	10	11	12
	INPUTS			ERROR CHECK		Surge height (m)	Wall Length (m)	sum of middleH * dL	Surge height (ft)	Rounding (ft)	delta Area (sq m)	Building numbers	Building Values (million $)	Cum Value	2080	2130	Marginal Damage	Damage	2030	Expected Benefit (million $, PV)	Residual Dam (million $, PV)	Cost (Million $)	Net Benefit (million $, PV)	2080	Expected Benefit (million $, PV)	Residual Dam (million $, PV)	Cost (Million $)	Net Benefit (million $, PV)	2130	Expected Benefit (million $, PV)	Residual Dam (million $, PV)	Cost (million $)	Net Benefit (million $, PV)		Surge height (m)		0	1	2	3	4	5	6	7	8	9	10	11	12
	SPATIAL DATA					1.8	2215.74	#REF!	5.9058	5.5	0	0	0	0	0	0	0	0		0	10.3325	5.86048	-5.86048		0	254.538	0.01	-0.01		0	0	0.01	-0.01		1.8		0	0	0	0	0	0	0	0	0	0	0	0	0
	City	Bridgeport				1.82	2270.91	#REF!	5.97142	5.5	0	0	0	0	0	0	0	0		0	10.3325	6.36491	-6.36491		0	254.538	0.01	-0.01		0	0	0.01	-0.01		1.82		0	0	0	0	0	0	0	0	0	0	0	0	0
	Policy Year (base year: 2020)	#REF!				1.84	2326.83	#REF!	6.03704	6	0	0	0	0	0	0	0	0		0	10.3325	6.89964	-6.89964		0	254.538	0.01	-0.01		0	0	0.01	-0.01		1.84		0	0	0	0	0	0	0	0	0	0	0	0	0
	SLR rate (before policy)	3.14	mm/year			1.86	2383.52	#REF!	6.10266	6	0	0	0	0	0	0	0	0		0	10.3325	7.46585	-7.46585		0	254.538	1.67014	-1.67014		0	0	0.01	-0.01		1.86		0	0	0	0	0	0	0	0	0	0	0	0	0
	SLR rate (after policy)	#REF!	mm/year			1.88	2440.99	#REF!	6.16828	6	0	0	0	0	0	0	0	0		0	10.3325	8.06473	-8.06473		0	254.538	1.91146	-1.91146		0	0	0.01	-0.01		1.88		0	0	0	0	0	0	0	0	0	0	0	0	0
	MHHW	1.06	meter			1.9	2499.25	#REF!	6.2339	6	0	0	0	0	0	0	0	0		0	10.3325	8.69752	-8.69752		0	254.538	2.17438	-2.17438		0	0	0.01	-0.01		1.9		0	0	0	0	0	0	0	0	0	0	0	0	0
						1.92	2558.31	#REF!	6.29952	6	0	0	0	0	0	0	0	0		0	10.3325	9.36547	-9.36547		0	254.538	2.4599	-2.4599		0	0	0.01	-0.01		1.92		0	0	0	0	0	0	0	0	0	0	0	0	0
						1.94	2618.18	#REF!	6.36514	6	0	0	0	0	0	0	0	0		0	10.3325	10.0699	-10.0699		0	254.538	2.76906	-2.76906		0	0	0.01	-0.01		1.94		0	0	0	0	0	0	0	0	0	0	0	0	0
	GEV ESTIMATION					1.96	2678.87	#REF!	6.43076	6	0	0	0	0	0	0	0	0		0	10.3325	10.812	-10.812		0	254.538	3.10293	-3.10293		0	0	0.01	-0.01		1.96		0	0	0	0	0	0	0	0	0	0	0	0	0
	μ (location)	1.845				1.98	2740.38	#REF!	6.49638	6	0	0	0	0	0	0	0	0		0	10.3325	11.5932	-11.5932		0	254.538	3.46261	-3.46261		0	0	0.01	-0.01		1.98		0	0	0	0	0	0	0	0	0	0	0	0	0
	σ (scale)	0.1544				2	2802.73	#REF!	6.562	6.5	0	0	0	0	0	0	0	0		0	10.3325	12.4149	-12.4149		0	254.538	3.84919	-3.84919		0	0	0.01	-0.01		2		0	0	0	0	0	0	0	0	0	0	0	0	0
	k (shape)	0.0752				2.02	2865.91	#REF!	6.62762	6.5	0	0	0	0	0	0	0	0		0	10.3325	13.2783	-13.2783		0	254.538	4.26382	-4.26382		0	0	0.01	-0.01		2.02		0	0	0	0	0	0	0	0	0	0	0	0	0
						2.04	2929.93	#REF!	6.69324	6.5	0	0	0	0	0	0	0	0		0	10.3325	14.185	-14.185		0	254.538	4.70767	-4.70767		0	0	0.01	-0.01		2.04		0	0	0	0	0	0	0	0	0	0	0	0	0
	Coefficients of the cost function					2.06	2994.8	#REF!	6.75886	6.5	0	0	0	0	0	0	0	0		0	10.3325	15.1363	-15.1363		0	254.538	5.1819	-5.1819		0	0	0.171302	-0.171302		2.06		0	0	0	0	0	0	0	0	0	0	0	0	0
	coef1	0.700515				2.08	3060.5	#REF!	6.82448	6.5	0	0	0	0	0	0	0	0		0	10.3325	16.1336	-16.1336		0	254.538	5.68771	-5.68771		0	0	0.112039	-0.112039		2.08		0	0	0	0	0	0	0	0	0	0	0	0	0
	coef2	0.000658776				2.1	3127.03	#REF!	6.8901	6.5	0	0	0	0	0	0	0	0		0	10.3325	17.1783	-17.1783		0	254.538	6.22634	-6.22634		0	0	0.0643919	-0.0643919		2.1		0	0	0	0	0	0	0	0	0	0	0	0	0
	coef3	-8.75071e-08		Buildings exist under MHHW		2.12	3194.4	#REF!	6.95572	6.5	0	0	0	0	0	0	0	0		0	10.3325	18.272	-18.272		0	254.538	6.799	-6.799		0	0	0.0292352	-0.0292352		2.12		0	0	0	0	0	0	0	0	0	0	0	0	0
	coef4	6.382e-12				2.14	3262.59	#REF!	7.02134	7	0	0	0	0	0	0	0	0		0	10.3325	19.4159	-19.4159		0	254.538	7.40695	-7.40695		0	0	0.0074648	-0.0074648		2.14		0	0	0	0	0	0	0	0	0	0	0	0	0
	q	4.05553e+07				2.16	3331.58	#REF!	7.08696	7	0	0	0	0	0	0	0	0		0	10.3325	20.6117	-20.6117		0	254.538	8.05143	-8.05143		0	0	0	0		2.16		0	0	0	0	0	0	0	0	0	0	0	0	0
	Growth Rate	0.005	%/year			2.18	3401.37	#REF!	7.15258	7	0	0	0	0	0	0	0	0		0	10.3325	21.8606	-21.8606		0	254.538	8.73372	-8.73372		0	0	0.00778233	-0.00778233		2.18		0	0	0	0	0	0	0	0	0	0	0	0	0
	discount rate	0.0426	%/year			2.2	3471.93	#REF!	7.2182	7	0	0	0	0	0	0	0	0		0	10.3325	23.164	-23.164		0	254.538	9.45508	-9.45508		0	0	0.0317751	-0.0317751		2.2		0	0	0	0	0	0	0	0	0	0	0	0	0
	useful_life	30	years			2.22	3543.24	#REF!	7.28382	7	0	0	0	0	0	0	0	0		0	10.3325	24.5235	-24.5235		0	254.538	10.2168	-10.2168		0	0	0.0729624	-0.0729624		2.22		0	0	0	0	0	0	0	0	0	0	0	0	0
	CapEx	0.005				2.24	3615.27	#REF!	7.34944	7	0	0	0	0	0	0	0	0		0	10.3325	25.9402	-25.9402		0	254.538	11.02	-11.02		0	0	0.132348	-0.132348		2.24		0	0	0	0	0	0	0	0	0	0	0	0	0
	Difference	0.02	meter			2.26	3688	#REF!	7.41506	7	0	0	0	0	0	0	0	0		0	10.3325	27.4155	-27.4155		0	254.538	11.8661	-11.8661		0	0	0.210954	-0.210954		2.26		0	0	0	0	0	0	0	0	0	0	0	0	0
	Minimum height where buildings locate	7.5	ft			2.28	3761.39	#REF!	7.48068	7	0	0	0	0	0	0	0	0		0	10.3325	28.9508	-28.9508		0	254.538	12.7563	-12.7563		0	0	0.309818	-0.309818		2.28		0	0	0	0	0	0	0	0	0	0	0	0	0
	A factor to account for other damages than buildings	2				2.3	3835.39	#REF!	7.5463	7.5	0	0	1.68348	1.68348	2.16164	2.7756	0.00841742	0.00841742		0.00508347	10.3275	30.5471	-30.542		0.15422	254.383	13.6918	-13.5376		0	0	0.429994	-0.429994		2.3		0.00012849	0.000123749	0.000119182	0.000127204	0.00012251	0.000117989	0.000113635	0.000109442	0.000116642	0.000112337	0.000108192	0.000104199	0.000100354
	Ratio of houses w/ basements	1	(1=All have basements; 0=No basements)			2.32	3909.98	#REF!	7.61192	7.5	0	0	1.68348	3.36697	4.32327	5.55119	0.0168348	0.0252523		0.018766	10.3138	32.2057	-32.1869		0.574425	253.963	14.6737	-14.0993		0	0	0.572546	-0.572546		2.32		0.000347434	0.000334613	0.000322265	0.000344352	0.000331645	0.000319407	0.00030762	0.000296268	0.00031621	0.000304542	0.000293303	0.00028248	0.000272056
	Average height of the first floor	0.9	meter			2.34	3985.09	#REF!	7.67754	7.5	0	0	1.68348	5.05045	6.48491	8.32679	0.0252523	0.0505045		0.043378	10.2892	33.9277	-33.8843		1.3425	253.195	15.7033	-14.3608		0	0	0.738549	-0.738549		2.34		0.000625738	0.000602647	0.000580409	0.000620746	0.000597839	0.000575778	0.000554531	0.000534067	0.00057067	0.000549612	0.00052933	0.000509797	0.000490984
	Coastal length 12ft	5456.48				2.36	4060.68	#REF!	7.74316	7.5	0	0	1.68348	6.73393	8.64654	11.1024	0.0336697	0.0841742		0.0803392	10.2522	35.714	-35.6337		2.6374	251.9	16.7816	-14.1442		0	0	0.929085	-0.929085		2.36		0.000938498	0.000903866	0.000870511	0.000931651	0.000897271	0.00086416	0.000832271	0.000801559	0.000857266	0.000825631	0.000795164	0.000765821	0.00073756
	OUTPUTS	2030	20800	2130		2.38	4136.7	#REF!	7.80878	7.5	0	0	1.68348	8.41742	10.8082	13.878	0.0420871	0.126261		0.130372	10.2022	37.5657	-37.4353		4.40785	250.13	17.9097	-13.5019		0	0	1.14524	-1.14524		2.38		0.00126619	0.00121946	0.00117446	0.00125758	0.00121117	0.00116648	0.00112343	0.00108198	0.00115797	0.00111524	0.00107408	0.00103445	0.000996275
	Optimal Level of Flood Defense	No_Wall	3.28	4.02		2.4	4213.09	#REF!	7.8744	7.5	0	0	1.68348	10.1009	12.9698	16.6536	0.0505045	0.176766		0.193645	10.1389	39.4836	-39.2899		6.68096	247.857	19.0887	-12.4078		0	0	1.38809	-1.38809		2.4		0.00159386	0.00153505	0.0014784	0.00158357	0.00152514	0.00146885	0.00141465	0.00136245	0.00145887	0.00140504	0.00135319	0.00130325	0.00125516
	Maximum height of Walls					2.42	4289.78	#REF!	7.94002	7.5	0	0	1.68348	11.7844	15.1314	19.4292	0.0589219	0.235688		0.26988	10.0627	41.4685	-41.1986		9.47651	245.061	20.3195	-10.843		0	0	1.65874	-1.65874		1.2		0.0019104	0.0018399	0.00177201	0.00189846	0.0018284	0.00176093	0.00169595	0.00163336	0.00174956	0.001685	0.00162282	0.00156293	0.00150526
	Average height of Walls	#VALUE!	1.77	1.86		2.44	4366.72	#REF!	8.00564	8	0	0	3.14368	14.9281	19.168	24.6122	0.0746403	0.310328		0.360591	9.97194	43.521	-43.1604		13.2504	241.287	21.6031	-8.35276		0	0	1.95825	-1.95825		1.22		0.00226103	0.00217759	0.00209724	0.00224709	0.00216417	0.0020843	0.00200739	0.00193331	0.00207127	0.00199484	0.00192123	0.00185033	0.00178205
	Average Elevation of wall	1.12	1.51	2.16		2.46	4443.83	#REF!	8.07126	8	0	0	3.14368	18.0717	23.2046	29.7953	0.0903587	0.400687		0.466413	9.86612	45.6418	-45.1754		17.7217	236.816	22.9404	-5.21872		0	803.25	2.28768	-2.28768		1.24		0.00262419	0.00252735	0.00243409	0.00260796	0.00251173	0.00241904	0.00232977	0.0022438	0.00240412	0.00231541	0.00222996	0.00214767	0.00206842
	Wall Length	No_Wall	5256.48	5626.48		2.48	4521.06	#REF!	8.13688	8	0	0	3.14368	21.2154	27.2412	34.9783	0.106077	0.506764		0.587231	9.74531	47.8315	-47.2442		22.9408	231.597	24.3321	-1.39128		0	803.25	2.64811	-2.64811		1.26		0.00298364	0.00287353	0.0027675	0.00296488	0.00285547	0.0027501	0.00264861	0.00255087	0.0027331	0.00263224	0.00253511	0.00244156	0.00235146
	Cost of Wall	No_Wall	94.1971	111.342		2.5	4598.33	#REF!	8.2025	8	0	0	3.14368	24.3591	31.2777	40.1614	0.121796	0.628559		0.72238	9.61016	50.0903	-49.368		28.9475	225.59	25.779	3.16852		0	803.25	3.04056	-3.04056		1.28		0.00332749	0.0032047	0.00308644	0.00330596	0.00318397	0.00306647	0.00295332	0.00284433	0.0030472	0.00293475	0.00282645	0.00272215	0.0026217
	Expected Benefit	No_Wall	219.147	651.655		2.52	4675.57	#REF!	8.26812	8	0	0	3.14368	27.5028	35.3143	45.3444	0.137514	0.766073		0.870823	9.46171	52.4188	-51.5479		35.3143	219.223	27.2818	8.03247		0	803.25	3.46606	-3.46606		1.3		0.00364735	0.00351276	0.00338313	0.00362286	0.00348917	0.00336041	0.00323641	0.00311698	0.00333868	0.00321548	0.00309682	0.00298254	0.00287248
	Net Benefit	#VALUE!	124.95	540.314		2.54	4752.72	#REF!	8.33374	8	0	0	3.14368	30.6465	39.3509	50.5275	0.153232	0.919306		1.03127	9.30127	54.817	-53.7857		39.3509	215.187	28.8412	10.5097		0	803.25	3.9256	-3.9256		1.32		0.00393765	0.00379234	0.0036524	0.00391002	0.00376573	0.00362677	0.00349293	0.00336404	0.00360242	0.00346948	0.00334145	0.00321815	0.00309939
	Residual Damage	10.3325	35.3906	151.594		2.56	4829.71	#REF!	8.39936	8	0	0	3.14368	33.7902	43.3874	55.7106	0.168951	1.08826		1.20227	9.13027	57.2852	-56.0829		43.3874	211.15	30.4576	12.9298		0	803.25	4.42016	-4.42016		1.34		0.004195	0.00404019	0.0038911	0.00416409	0.00401042	0.00386243	0.0037199	0.00358263	0.00383533	0.0036938	0.00355749	0.00342621	0.00329978
	Expected Damage	10.3325	254.538	803.25		2.58	4906.48	#REF!	8.46498	8	0	0	3.14368	36.9338	47.424	60.8936	0.184669	1.27293		1.38231	8.95023	59.8235	-58.4412		47.424	207.114	32.1317	15.2923		0	803.25	4.95068	-4.95068		1.36		0.00441772	0.0042547	0.00409769	0.00438344	0.00422168	0.00406589	0.00391585	0.00377135	0.00403593	0.003887	0.00374356	0.00360542	0.00347237
						2.6	4916.48	#REF!	8.5306	8.5	0	0	5.69323	42.6271	54.7342	70.2802	0.213135	1.48606		1.57147	8.76106	61.599	-60.0276		54.7342	199.803	33.4121	21.3222		11.2039	792.046	5.44447	5.75942		1.38		0.00464531	0.00447389	0.00430879	0.00460727	0.00443725	0.00427351	0.00411581	0.00396393	0.00424034	0.00408387	0.00393316	0.00378802	0.00364824
Heght(m)	Surge height (ft)	Area submerged (sq m)	delta Area (sq m)	Building numbers	Building Values (million $)	2.62	4926.48	#REF!	8.59622	8.5	0	0	5.69323	48.3203	62.0445	79.6667	0.241601	1.72766		1.60223	8.73031	63.4038	-61.8016		58.6663	195.871	34.7199	23.9464		13.0254	790.224	5.96278	7.06263		1.4		0.00540053	0.00520124	0.00500931	0.00535631	0.00515865	0.00496829	0.00478495	0.00460838	0.00492973	0.00474782	0.00457261	0.00440387	0.00424136
0.9144	3	6528	0	0	0	2.64	4936.48	#REF!	8.66184	8.5	0	0	5.69323	54.0135	69.3547	89.0532	0.270068	1.99773		1.83108	8.50146	65.238	-63.4069		69.3547	185.183	36.0554	33.2993		38.2733	764.976	6.50573	31.7676		1.42		0.00562726	0.00541961	0.00521961	0.00557861	0.00537275	0.00517448	0.00498354	0.00479963	0.00513211	0.00494273	0.00476033	0.00458467	0.00441549
1.0668	3.5	9156	2628		0	2.66	4946.48	#REF!	8.72746	8.5	0	0	5.69323	59.7067	76.665	98.4398	0.298534	2.29626		2.06783	8.2647	67.1018	-65.0339		76.665	177.873	37.4187	39.2463		76.3384	726.911	7.07347	69.2649		1.44		0.00583145	0.00561626	0.00540901	0.00577822	0.00556499	0.00535963	0.00516185	0.00497137	0.00531329	0.00511722	0.00492839	0.00474652	0.00457136
1.2192	4	11101.6	1945.6		0	2.68	4956.48	#REF!	8.79308	8.5	0	0	5.69323	65.4	83.9752	107.826	0.327	2.62326		2.3113	8.02124	68.9952	-66.6839		83.9752	170.562	38.8098	45.1654		83.9752	719.274	7.66613	76.3091		1.46		0.00600913	0.00578739	0.00557382	0.00595125	0.00573164	0.00552013	0.00531643	0.00512024	0.00546974	0.00526789	0.0050735	0.00488628	0.00470596
1.3716	4.5	13759.8	2658.2		0	2.7	4966.48	#REF!	8.8587	8.5	0	0	5.69323	71.0932	91.2855	117.213	0.355466	2.97873		2.56021	7.77233	70.9184	-68.3582		91.2855	163.252	40.229	51.0565		91.2855	711.964	8.28385	83.0016		1.48		0.00615808	0.00593083	0.00571197	0.00609555	0.00587061	0.00565397	0.00544533	0.00524439	0.00559951	0.00539288	0.00519387	0.00500221	0.00481762
1.524	5	18960.6	5200.8		0	2.72	4976.48	#REF!	8.92432	8.5	0	0	5.69323	76.7864	98.5957	126.599	0.383932	3.36266		2.81327	7.51926	72.8716	-70.0583		98.5957	155.942	41.6763	56.9194		98.5957	704.654	8.92677	89.669		1.5		0.00627735	0.00604571	0.00582261	0.00621025	0.00598108	0.00576036	0.00554779	0.00534307	0.00570187	0.00549146	0.00528882	0.00509365	0.00490568
1.6764	5.5	19615.2	654.6		0	2.74	4986.48	#REF!	8.98994	8.5	0	0	5.69323	82.4797	105.906	135.986	0.412398	3.77506		3.06922	7.26332	74.8549	-71.7857		105.906	148.632	43.152	62.754		105.906	697.344	9.59503	96.3109		1.52		0.00636704	0.00613208	0.00590579	0.00629548	0.00606316	0.00583942	0.00562394	0.0054164	0.005777	0.00556381	0.0053585	0.00516076	0.00497032
1.8288	6	27308.8	7693.6		0	2.76	4996.48	#REF!	9.05556	9	0	0	4.43834	86.918	111.605	143.304	0.43459	4.20965		3.32645	7.00609	76.8684	-73.542		111.605	142.933	44.6561	66.9489		111.605	691.645	10.2888	101.316		1.54		0.00641836	0.00618151	0.0059534	0.00634265	0.0061086	0.00588318	0.00566608	0.00545699	0.00581706	0.0056024	0.00539566	0.00519655	0.00500479
1.9812	6.5	59399.8	32091		0	2.78	5006.48	#REF!	9.12118	9	0	0	4.43834	91.3563	117.304	150.621	0.456782	4.66643		3.58353	6.749	78.9123	-75.3288		117.304	137.234	46.1887	71.1151		117.304	685.946	11.0081	106.296		1.56		0.00643541	0.00619794	0.00596922	0.00635587	0.00612132	0.00589544	0.00567788	0.00546836	0.00582589	0.00561091	0.00540385	0.00520444	0.00501239
2.1336	7	86224.4	26824.6		0	2.8	5016.48	#REF!	9.1868	9	0	0	4.43834	95.7947	123.003	157.939	0.478973	5.14541		3.83923	6.4933	80.9867	-77.1475		123.003	131.535	47.7501	75.2526		123.003	680.247	11.7532	111.25		1.58		0.00642208	0.00618509	0.00595685	0.00633903	0.00610511	0.00587982	0.00566284	0.00545387	0.00580714	0.00559284	0.00538646	0.00518769	0.00499625
2.286	7.5	117287	31062.2	31.467	11.7844	2.82	5026.48	#REF!	9.25242	9	0	0	4.43834	100.233	128.702	165.256	0.501165	5.64657		4.09247	6.24007	83.0918	-78.9993		128.702	125.836	49.3404	79.3613		128.702	674.548	12.5241	116.178		1.6		0.00638202	0.00614651	0.00591969	0.00629582	0.00606349	0.00583974	0.00562424	0.00541669	0.00576422	0.00555151	0.00534665	0.00514935	0.00495933
2.4384	8	183578	66290.9	67.1548	25.1495	2.84	5036.48	#REF!	9.31804	9	0	0	4.43834	104.671	134.401	172.574	0.523357	6.16993		4.34231	5.99023	85.2276	-80.8853		134.401	120.137	50.9597	83.441		134.401	668.849	13.3211	121.08		1.62		0.00631866	0.00608549	0.00586092	0.00622967	0.00599978	0.00577838	0.00556514	0.00535978	0.00570033	0.00548998	0.00528739	0.00509227	0.00490436
2.5908	8.5	303631	120053	121.618	45.5458	2.86	5046.48	#REF!	9.38366	9	0	0	4.43834	109.11	140.1	179.891	0.545548	6.71548		4.58797	5.74457	87.3943	-82.8064		140.1	114.438	52.6081	87.4915		140.1	663.15	14.1443	125.955		1.64		0.00623517	0.00600508	0.00578348	0.00614374	0.00591703	0.00569868	0.00548839	0.00528585	0.00561842	0.00541109	0.00521141	0.0050191	0.00483388
2.7432	9	385523	81892.4	82.9596	31.0684	2.88	5056.48	#REF!	9.44928	9	0	0	4.43834	113.548	145.799	187.209	0.56774	7.28322		4.82878	5.50376	89.5921	-84.7633		145.677	108.861	54.2857	91.3913		145.799	657.451	14.9937	130.805		1.66		0.00613446	0.00590809	0.00569007	0.00604096	0.00581804	0.00560334	0.00539657	0.00519742	0.00552118	0.00531744	0.00512122	0.00493223	0.00475022
2.8956	9.5	592763	207240	209.941	78.6228	2.9	5066.48	#REF!	9.5149	9.5	0	0	9.82785	123.376	158.418	203.412	0.616879	7.90009		5.065	5.26754	91.8211	-86.7561		150.959	103.579	55.9928	94.9663		158.418	644.832	15.8696	142.548		1.68		0.00603981	0.00581693	0.00560227	0.00594425	0.0057249	0.00551364	0.00531018	0.00511422	0.0054296	0.00522924	0.00503627	0.00485042	0.00467143
3.048	10	753805	161042	163.14	61.096	2.92	5076.48	#REF!	9.58052	9.5	0	0	9.82785	133.204	171.037	219.616	0.666019	8.56611		5.29677	5.03577	94.0814	-88.7847		155.982	98.5559	57.7294	98.2523		171.037	632.213	16.772	154.265		1.7		0.00594795	0.00572846	0.00551707	0.00585041	0.00563452	0.0054266	0.00522634	0.00503348	0.00534074	0.00514366	0.00495385	0.00477104	0.00459498
3.2004	10.5	973057	219252	222.109	83.18	2.94	5086.48	#REF!	9.64614	9.5	0	0	9.82785	143.032	183.656	235.819	0.715158	9.28127		5.52413	4.80841	96.3732	-90.8491		160.775	93.7629	59.4957	101.279		183.656	619.594	17.7012	165.955		1.72		0.0058565	0.00564039	0.00543225	0.00575709	0.00554464	0.00534003	0.00514297	0.00495319	0.00525246	0.00505863	0.00487196	0.00469218	0.00451903
3.3528	11	1.10929e+06	136236	138.011	51.6851	2.96	5096.48	#REF!	9.71176	9.5	0	0	9.82785	152.859	196.275	252.023	0.764297	10.0456		5.74705	4.58549	98.6966	-92.9495		165.364	89.1741	61.2918	104.072		196.275	606.974	18.6572	177.618		1.74		0.00576376	0.00555107	0.00534622	0.00566262	0.00545365	0.0052524	0.00505858	0.00487191	0.00516324	0.00497271	0.00478921	0.00461248	0.00444227
3.5052	11.5	1208939	99646.3	100.945	37.8038	2.98	5106.48	#REF!	9.77738	9.5	0	0	9.82785	162.687	208.895	268.226	0.813436	10.859		5.96547	4.36707	101.052	-95.0863		169.768	84.7698	63.1179	106.65		208.895	594.355	19.6402	189.254		1.76		0.00566859	0.0054594	0.00525794	0.00556587	0.00536048	0.00516267	0.00497216	0.00478868	0.00507207	0.0048849	0.00470464	0.00453103	0.00436382
3.6576	12	1349823	140884	142.72	53.4486	3	5116.48	#REF!	9.843	9.5	0	0	9.82785	172.515	221.514	284.429	0.862576	11.7216		6.1793	4.15323	103.439	-97.2594		174.004	80.5333	64.9741	109.03		221.514	581.736	20.6503	200.864		1.78		0.00557026	0.0053647	0.00516673	0.00546616	0.00526445	0.00507018	0.00488308	0.00470289	0.00497831	0.0047946	0.00461767	0.00444727	0.00428316
3.81	12.5	1.38151e+06	31682.8	32.0957	12.0198	3.02	5126.48	#REF!	9.90862	9.5	0	0	9.82785	182.343	234.133	300.633	0.911715	12.6333		6.38844	3.94409	105.858	-99.4693		178.087	76.4509	66.8605	111.226		234.133	569.117	21.6876	212.445		1.8		0.00546839	0.00526659	0.00507225	0.00536312	0.00516521	0.0049746	0.00479103	0.00461423	0.00488164	0.0047015	0.004528	0.00436091	0.00419998
3.9624	13	1.48056e+06	99055.9	100.347	37.5799	3.04	5136.48	#REF!	9.97424	9.5	0	0	9.82785	192.171	246.752	316.836	0.960854	13.5941		6.59279	3.73975	108.309	-101.716		182.027	72.5107	68.7772	113.25		246.752	556.497	22.7524	224		1.82		0.00536286	0.00516496	0.00497436	0.00525662	0.00506264	0.00487582	0.00469589	0.0045226	0.00478195	0.00460549	0.00443554	0.00427186	0.00411422
4.1148	13.5	1.57055e+06	89987.9	91.1606	34.1396	3.06	5146.48	#REF!	10.0399	10	0	0	7.637	199.808	256.558	329.427	0.999039	14.5932		6.79209	3.54044	110.792	-104		185.83	68.7079	70.7245	115.105		256.558	546.691	23.8447	232.714		1.84		0.00524979	0.00505607	0.00486949	0.00514288	0.00495309	0.00477032	0.00459428	0.00442474	0.00467581	0.00450327	0.00433709	0.00417704	0.0040229
4.2672	14	1.65096e+06	80408.9	81.4567	30.5055	3.08	5156.48	#REF!	10.1055	10	0	0	7.637	207.445	266.364	342.019	1.03722	15.6304		6.98615	3.34639	113.308	-106.322		189.499	65.0384	72.7024	116.797		266.364	536.885	24.9646	241.4		1.86		0.00513044	0.00494112	0.00475878	0.00502313	0.00483776	0.00465924	0.00448731	0.00432172	0.00456435	0.00439592	0.0042337	0.00407747	0.003927
4.4196	14.5	1.79985e+06	148890	150.83	56.4858	3.1	5166.48	#REF!	10.1711	10	0	0	7.637	215.082	276.171	354.61	1.07541	16.7058		7.17481	3.15773	115.857	-108.682		193.039	61.4988	74.7111	118.328		276.171	527.079	26.1124	250.058		1.88		0.00500595	0.00482122	0.00464331	0.00489851	0.00471774	0.00454365	0.00437598	0.0042145	0.00444861	0.00428445	0.00412634	0.00397407	0.00382742
4.572	15	1.88193e+06	82083.5	83.1532	31.1409	3.12	5176.48	#REF!	10.2367	10	0	0	7.637	222.719	285.977	367.201	1.11359	17.8194		7.35796	2.97458	118.438	-111.08		196.451	58.0864	76.7507	119.701		285.977	517.273	27.2881	258.689		1.9		0.00487738	0.0046974	0.00452406	0.00477006	0.00459404	0.00442451	0.00426123	0.00410399	0.00432954	0.00416977	0.0040159	0.00386771	0.00372498
4.7244	15.5	1.99604e+06	114111	115.598	43.2915	3.14	5186.48	#REF!	10.3023	10	0	0	7.637	230.356	295.783	379.793	1.15178	18.9712		7.53553	2.79701	121.052	-113.516		199.736	54.8014	78.8214	120.915		295.783	507.467	28.4919	267.291		1.92		0.00474571	0.00457059	0.00440192	0.00463874	0.00446756	0.0043027	0.00414392	0.003991	0.00420802	0.00405273	0.00390318	0.00375915	0.00362043
4.8768	16	2.13053e+06	134485	136.238	51.0211	3.16	5196.48	#REF!	10.368	10	0	0	7.637	237.993	305.589	392.384	1.18996	20.1612		7.70747	2.62506	123.699	-115.991		202.893	51.6444	80.9233	121.97		305.589	497.661	29.7239	275.865		1.94		0.00461181	0.00444162	0.00427772	0.0045054	0.00433915	0.00417902	0.00402481	0.00387629	0.00408482	0.00393409	0.00378891	0.00364909	0.00351443
5.0292	16.5	2.26411e+06	133586	135.327	50.6798	3.18	5206.48	#REF!	10.4336	10	0	0	7.637	245.63	315.395	404.975	1.22815	21.3893		7.87379	2.45875	126.379	-118.505		205.921	48.6165	83.0564	122.865		315.395	487.855	30.9842	284.411		1.96		0.00447647	0.00431128	0.00415219	0.00437083	0.00420954	0.0040542	0.00390459	0.00376051	0.00396066	0.0038145	0.00367374	0.00353817	0.00340761
5.1816	17	2.39024e+06	126127	127.77	47.85	3.2	5216.48	#REF!	10.4992	10	0	0	7.637	253.267	325.201	417.566	1.26633	22.6556		8.03449	2.29805	129.092	-121.058		208.818	45.7194	85.2211	123.597		325.201	478.049	32.2731	292.928		1.98		0.0043404	0.00418023	0.00402598	0.00423572	0.00407941	0.00392887	0.00378389	0.00364426	0.00383616	0.0036946	0.00355826	0.00342695	0.00330049
5.334	17.5	2.4792e+06	88959.7	90.119	33.7496	3.22	5226.48	#REF!	10.5648	10.5	0	0	11.8829	265.15	340.459	437.158	1.32575	23.9814		8.18974	2.14279	131.839	-123.649		211.586	42.9511	87.4174	124.169		340.459	462.791	33.5906	306.868		2		0.00420797	0.00405269	0.00390314	0.00410431	0.00395285	0.00380698	0.0036665	0.0035312	0.00371516	0.00357806	0.00344603	0.00331886	0.00319639
5.4864	18	2.54534e+06	66140.3	67.0022	25.0923	3.24	5236.48	#REF!	10.6304	10.5	0	0	11.8829	277.033	355.717	456.749	1.38516	25.3666		8.33973	1.99281	134.619	-126.28		214.229	40.3089	89.6454	124.583		355.717	447.533	34.9368	320.78		2.02		0.00407879	0.00392828	0.00378331	0.00397623	0.0038295	0.00368818	0.00355208	0.003421	0.00359732	0.00346458	0.00333673	0.00321359	0.00309501
						3.26	5246.48	#REF!	10.6961	10.5	0	0	11.8829	288.915	370.975	476.341	1.44458	26.8111		8.48457	1.84796	137.433	-128.949		216.748	37.7899	91.9052	124.842		370.975	432.275	36.312	334.663		2.04		0.00395259	0.00380673	0.00366626	0.0038512	0.00370909	0.00357222	0.00344039	0.00331344	0.00348239	0.00335388	0.00323012	0.00311092	0.00299612
						3.28	5256.48	#REF!	10.7617	10.5	0	0	11.8829	300.798	386.233	495.932	1.50399	28.3151		8.62443	1.7081	140.281	-131.657		219.147	35.3906	94.1971	124.95		386.233	417.017	37.7161	348.516		2.06		0.00382917	0.00368787	0.00355178	0.00372904	0.00359143	0.0034589	0.00333126	0.00320833	0.00337018	0.00324581	0.00312603	0.00301068	0.00289958
		2030	2080	2130		3.3	5266.48	#REF!	10.8273	10.5	0	0	11.8829	312.681	401.49	515.524	1.56341	29.8785		8.75944	1.5731	143.163	-134.403		221.43	33.1074	96.5212	124.909		401.49	401.759	39.1495	362.341		2.08		0.00370839	0.00357154	0.00343975	0.00360958	0.00347638	0.0033481	0.00322455	0.00310555	0.00326054	0.00314022	0.00302434	0.00291274	0.00280525
	12 ft wall	4.78	5.17	5.82		3.32	5276.48	#REF!	10.8929	10.5	0	0	11.8829	324.564	416.748	535.115	1.62282	31.5013		8.88971	1.44283	146.078	-137.189		223.601	30.9364	98.8775	124.724		416.748	386.501	40.6122	376.136		2.1		0.00359016	0.00345768	0.00333008	0.00349275	0.00336386	0.00323972	0.00312017	0.00300503	0.0031534	0.00303704	0.00292496	0.00281703	0.00271307
	Length	9826.71	10293.2	10968.3		3.34	5286.48	#REF!	10.9585	10.5	0	0	11.8829	336.447	432.006	554.707	1.68223	33.1836		9.01538	1.31716	149.028	-140.013		225.664	28.8738	101.266	124.398		432.006	371.244	42.1043	389.902		2.12		0.00347442	0.00334621	0.00322273	0.00337847	0.00325379	0.00313372	0.00301808	0.00290671	0.00304869	0.00293619	0.00282784	0.00272349	0.00262299
	Cost	780.331	817.371	870.986		3.36	5296.48	#REF!	11.0242	11	0	0	6.46064	342.907	440.302	565.359	1.71454	34.8981		9.13646	1.19607	152.013	-142.876		227.621	26.9169	103.688	123.933		440.302	362.948	43.6261	396.676		2.14		0.00335853	0.0032346	0.00311523	0.00326417	0.00314372	0.00302771	0.00291598	0.00280837	0.00294409	0.00283545	0.00273081	0.00263004	0.00253299
						3.38	5306.48	#REF!	11.0898	11	0	0	6.46064	349.368	448.597	576.011	1.74684	36.645		9.25302	1.07951	155.031	-145.778		229.475	25.0627	106.142	123.333		448.597	354.652	45.1775	403.42		2.16		0.00324311	0.00312343	0.00300817	0.00315045	0.0030342	0.00292223	0.00281439	0.00271054	0.00284013	0.00273532	0.00263438	0.00253717	0.00244354
						3.4	5316.48	#REF!	11.1554	11	0	0	6.46064	355.829	456.893	586.662	1.77914	38.4241		9.36512	0.967413	158.085	-148.72		231.23	23.3077	108.629	122.601		456.893	346.357	46.7588	410.134		2.18		0.00312867	0.00301322	0.00290203	0.00303782	0.00292572	0.00281776	0.00271378	0.00261363	0.00273726	0.00263625	0.00253896	0.00244527	0.00235504
						3.42	5326.48	#REF!	11.221	11	0	0	6.46064	362.289	465.189	597.314	1.81145	40.2355		9.47284	0.859695	161.173	-151.7		232.889	21.6483	111.148	121.741		465.189	338.061	48.3702	416.819		2.2		0.00301566	0.00290438	0.0027972	0.0029267	0.0028187	0.00271468	0.00261451	0.00251803	0.00263585	0.00253859	0.00244491	0.00235469	0.00226779
						3.44	5336.48	#REF!	11.2866	11	0	0	6.46064	368.75	473.484	607.966	1.84375	42.0793		9.57627	0.756265	164.296	-154.72		234.457	20.0806	113.701	120.756		473.484	329.765	50.0116	423.473		2.22		0.00290444	0.00279726	0.00269404	0.00281743	0.00271346	0.00261333	0.00251689	0.00242401	0.00253623	0.00244264	0.0023525	0.00226569	0.00218208
						3.46	5346.48	#REF!	11.3523	11	0	0	6.46064	375.211	481.78	618.618	1.87605	43.9553		9.67552	0.657018	167.454	-157.779		235.937	18.6006	116.288	119.649		481.78	321.47	51.6834	430.097		2.24		0.00279531	0.00269216	0.00259281	0.0027103	0.00261029	0.00251396	0.00242119	0.00233185	0.00243865	0.00234866	0.00226199	0.00217851	0.00209812
						3.48	5356.48	#REF!	11.4179	11	0	0	6.46064	381.671	490.076	629.27	1.90836	45.8637		9.77069	0.561845	170.647	-160.877		237.333	17.2043	118.907	118.426		490.076	313.174	53.3855	436.69		2.26		0.00268852	0.00258931	0.00249376	0.00260555	0.0025094	0.0024168	0.00232761	0.00224172	0.0023433	0.00225683	0.00217355	0.00209334	0.00201609
						3.5	5366.48	#REF!	11.4835	11	0	0	6.46064	388.132	498.371	639.921	1.94066	47.8044		9.86191	0.47063	173.876	-164.014		238.65	15.8878	121.56	117.09		498.371	304.879	55.1182	443.253		2.28		0.00258425	0.00248889	0.00239704	0.00250336	0.00241098	0.00232201	0.00223632	0.0021538	0.00225035	0.00216731	0.00208733	0.00201031	0.00193612
						3.52	5376.48	#REF!	11.5491	11.5	0	0	5.40055	393.532	505.306	648.825	1.96766	49.772		9.94927	0.383263	177.14	-167.191		239.891	14.6471	124.247	115.643		505.306	297.944	56.8816	448.424		2.3		0.00248241	0.0023908	0.00230258	0.00240361	0.00231491	0.00222949	0.00214722	0.00206798	0.0021597	0.00208	0.00200325	0.00192932	0.00185813
						3.54	5386.48	#REF!	11.6147	11.5	0	0	5.40055	398.933	512.24	657.729	1.99466	51.7667		10.0329	0.299628	180.44	-170.407		241.059	13.4786	126.968	114.091		512.24	291.01	58.6759	453.564		2.32		0.00238316	0.00229521	0.00221052	0.00230648	0.00222137	0.00213939	0.00206045	0.00198441	0.00207149	0.00199504	0.00192142	0.00185052	0.00178223
						3.56	5396.48	#REF!	11.6804	11.5	0	0	5.40055	404.334	519.175	666.633	2.02167	53.7884		10.1129	0.219605	183.775	-173.662		242.159	12.3785	129.722	112.437		519.175	284.075	60.501	458.673		2.34		0.00228664	0.00220226	0.00212099	0.00221209	0.00213046	0.00205184	0.00197612	0.0019032	0.00198582	0.00191254	0.00184196	0.00177399	0.00170853
						3.58	5406.48	#REF!	11.746	11.5	0	0	5.40055	409.734	526.109	675.537	2.04867	55.837		10.1895	0.143075	187.146	-176.957		243.194	11.3431	132.511	110.684		526.109	277.141	62.3573	463.752		2.36		0.00219295	0.00211203	0.00203409	0.00212052	0.00204227	0.00196691	0.00189433	0.00182442	0.00190278	0.00183257	0.00176494	0.00169981	0.00163708
						3.6	5416.48	#REF!	11.8116	11.5	0	0	5.40055	415.135	533.043	684.441	2.07567	57.9127		10.2626	0.0699136	190.553	-180.291		244.169	10.3691	135.334	108.835		533.043	270.206	64.2448	468.799		2.38		0.00210216	0.00202459	0.00194988	0.00203185	0.00195687	0.00188466	0.00181511	0.00174813	0.00182242	0.00175517	0.0016904	0.00162802	0.00156794
						3.62	5426.48	#REF!	11.8772	11.5	0	0	5.40055	420.535	539.978	693.345	2.10268	60.0154		10.3325	0	193.997	-183.664		245.085	9.45289	138.191	106.894		539.978	263.272	66.1637	473.814		2.4		0.00201432	0.00193998	0.0018684	0.00194611	0.00187429	0.00180513	0.00173852	0.00167436	0.00174475	0.00168037	0.00161836	0.00155864	0.00150112
						3.64	5436.48	#REF!	11.9428	11.5	0	0	5.40055	425.936	546.912	702.249	2.12968	62.1451							245.946	8.59134	141.083	104.864		546.912	256.337	68.1142	478.798		2.42		0.00192943	0.00185823	0.00178966	0.0018633	0.00179454	0.00172832	0.00166454	0.00160312	0.0016698	0.00160818	0.00154883	0.00149168	0.00143663
						3.66	5446.48	#REF!	12.0085	12	0	0	6.68108	432.617	555.491	713.265	2.16308	64.3081							246.756	7.78121	144.009	102.748		555.491	247.759	70.0962	485.395		2.44		0.00184768	0.0017795	0.00171383	0.00178361	0.00171779	0.0016544	0.00159335	0.00153455	0.0015977	0.00153874	0.00148196	0.00142727	0.0013746
						3.68	5456.48	#REF!	12.0741	12	0	0	6.68108	439.298	564.07	724.28	2.19649	66.5046							247.518	7.01947	146.97	100.548		564.07	239.18	72.1101	491.96		2.46		0.00176902	0.00170374	0.00164087	0.00170697	0.00164398	0.00158331	0.00152488	0.00146861	0.0015284	0.001472	0.00141768	0.00136537	0.00131498
						3.7	5466.48	#REF!	12.1397	12	0	0	6.68108	445.979	572.648	735.295	2.22989	68.7345							248.234	6.30324	149.966	98.2686		572.648	230.601	74.1558	498.492		2.48		0.00169338	0.00163089	0.00157071	0.00163331	0.00157304	0.00151499	0.00145908	0.00140524	0.00146184	0.0014079	0.00135594	0.00130591	0.00125772
						3.72	5476.48	#REF!	12.2053	12	0	0	6.68108	452.66	581.227	746.31	2.2633	70.9978							248.908	5.62981	152.997	95.9111		581.227	222.023	76.2337	504.993		2.5		0.00162069	0.00156089	0.00150329	0.00156256	0.0015049	0.00144937	0.00139588	0.00134437	0.00139795	0.00134636	0.00129668	0.00124883	0.00120274
						3.74	5486.48	#REF!	12.2709	12	0	0	6.68108	459.341	589.806	757.325	2.29671	73.2945							249.541	4.99658	156.063	93.4781		589.806	213.444	78.3437	511.462		2.52		0.00155088	0.00149365	0.00143853	0.00149465	0.00143949	0.00138637	0.00133521	0.00128594	0.00133665	0.00128732	0.00123982	0.00119406	0.00115
						3.76	5496.48	#REF!	12.3366	12	0	0	6.68108	466.022	598.384	768.341	2.33011	75.6246							250.136	4.40115	159.164	90.9721		598.384	204.865	80.4861	517.898		2.54		0.00148387	0.00142911	0.00137637	0.00142949	0.00137674	0.00132594	0.00127701	0.00122988	0.00127786	0.00123071	0.00118529	0.00114155	0.00109943
						3.78	5506.48	#REF!	12.4022	12	0	0	6.68108	472.703	606.963	779.356	2.36352	77.9882							250.696	3.84121	162.301	88.3951		606.963	196.287	82.6609	524.302		2.56		0.00141957	0.00136718	0.00131673	0.00136701	0.00131656	0.00126798	0.00122119	0.00117613	0.00122152	0.00117644	0.00113303	0.00109122	0.00105095
						3.8	5516.48	#REF!	12.4678	12	0	0	6.68108	479.384	615.542	790.371	2.39692	80.3851							251.223	3.31462	165.474	85.7492		615.542	187.708	84.8684	530.673		2.58		0.0013579	0.00130779	0.00125953	0.00130712	0.00125888	0.00121243	0.00116768	0.0011246	0.00116754	0.00112445	0.00108296	0.001043	0.00100451
						3.82	5526.48	#REF!	12.5334	12.5	0	0	1.50248	480.887	617.471	792.848	2.40443	82.7895							251.718	2.81949	168.682	83.0361		617.471	185.779	87.1086	530.362		2.6		0.00129838	0.00125047	0.00120432	0.00124934	0.00120323	0.00115883	0.00111607	0.00107488	0.00111549	0.00107433	0.00103468	0.000996502	0.000959729
						3.84	5536.48	#REF!	12.599	12.5	0	0	1.50248	482.389	619.4	795.325	2.41195	85.2015							252.184	2.35403	171.926	80.2575		619.4	183.85	89.3817	530.018		2.62		0.001241	0.00119521	0.0011511	0.00119367	0.00114962	0.0011072	0.00106634	0.00102699	0.00106538	0.00102606	0.0009882	0.000951734	0.000916613
						3.86	5546.48	#REF!	12.6647	12.5	0	0	1.50248	483.892	621.329	797.803	2.41946	87.6209							252.621	1.91654	175.206	77.4149		621.329	181.92	91.6878	529.642		2.64		0.00118577	0.00114201	0.00109987	0.00114011	0.00109804	0.00105752	0.00101849	0.000980907	0.00101718	0.000979645	0.000943494	0.000908678	0.000875146
						3.88	5556.48	#REF!	12.7303	12.5	0	0	1.50248	485.394	623.259	800.28	2.42697	90.0479							253.032	1.50537	178.522	74.5099		623.259	179.991	94.0271	529.231		2.66		0.00113264	0.00109084	0.00105059	0.00108862	0.00104845	0.00100976	0.000972496	0.000936609	0.000970877	0.000935049	0.000900544	0.000867313	0.000835307
						3.9	5566.48	#REF!	12.7959	12.5	0	0	1.50248	486.897	625.188	802.757	2.43448	92.4824							253.419	1.11897	181.875	71.5438		625.188	178.062	96.3996	528.788		2.68		0.0010816	0.00104169	0.00100325	0.00103918	0.00100083	0.000963896	0.000928327	0.00089407	0.000926433	0.000892246	0.000859321	0.00082761	0.00079707
						3.92	5576.48	#REF!	12.8615	12.5	0	0	1.50248	488.399	627.117	805.234	2.442	94.9244							253.782	0.755882	185.264	68.518		627.117	176.133	98.8056	528.311		2.7		0.00103261	0.000994501	0.000957802	0.000991739	0.000955142	0.000919895	0.000885949	0.000853256	0.000883814	0.000851199	0.000819788	0.000789537	0.000760401
						3.94	5586.48	#REF!	12.9271	12.5	0	0	1.50248	489.902	629.046	807.711	2.44951	97.3739							253.954	0.583982	188.689	65.2645		629.046	174.204	101.245	527.801		2.72		0.000985613	0.000949242	0.000914213	0.000946261	0.000911342	0.000877712	0.000845323	0.000814129	0.000842975	0.000811867	0.000781908	0.000753054	0.000725265
						3.96	5596.48	#REF!	12.9928	12.5	0	0	1.50248	491.404	630.975	810.188	2.45702	99.8309							254.114	0.423166	192.151	61.9632		630.975	172.274	103.718	527.257		2.74		0.000940574	0.000905865	0.000872437	0.000902694	0.000869383	0.000837301	0.000806403	0.000776645	0.000803871	0.000774206	0.000745636	0.000718121	0.000691621
						3.98	5606.48	#REF!	13.0584	13	0	0	5.36855	496.773	637.869	819.04	2.48386	102.315							254.265	0.272686	195.65	58.6147		637.869	165.381	106.226	531.643		2.76		0.000897605	0.000864481	0.00083258	0.000861148	0.00082937	0.000798765	0.000769289	0.0007409	0.000766596	0.000738307	0.000711062	0.000684823	0.000659551
						4	5616.48	#REF!	13.124	13	0	0	5.36855	502.141	644.762	827.891	2.51071	104.825							254.406	0.131847	199.186	55.2196		644.762	158.488	108.767	535.995		2.78		0.000856616	0.000825005	0.000794561	0.000821533	0.000791217	0.00076202	0.0007339	0.000706818	0.00073107	0.000704092	0.00067811	0.000653086	0.000628986
						4.02	5626.48	#REF!	13.1896	13	0	0	5.36855	507.51	651.655	836.742	2.53755	107.363							254.538	0	202.759	51.7785		651.655	151.594	111.342	540.314		2.8		0.00081752	0.000787352	0.000758298	0.000783765	0.000754842	0.000726987	0.00070016	0.000674323	0.000697213	0.000671485	0.000646706	0.000622841	0.000599857
						4.04	8749.18	#REF!	13.2552	13	0	0	5.36855	512.878	658.549	845.593	2.56439	109.927												658.549	144.701	176.88	481.669		2.82		0.000780234	0.000751442	0.000723713	0.000747759	0.000720165	0.00069359	0.000667995	0.000643344	0.000664951	0.000640413	0.00061678	0.00059402	0.0005721
						4.06	8782.75	#REF!	13.3209	13	0	0	5.36855	518.247	665.442	854.445	2.59123	112.519												665.442	137.808	181.357	484.085		2.84		0.000744677	0.000717197	0.000690731	0.000713436	0.000687109	0.000661753	0.000637333	0.000613815	0.000634209	0.000610806	0.000588266	0.000566558	0.000545651
						4.08	8816.01	#REF!	13.3865	13	0	0	5.36855	523.615	672.336	863.296	2.61808	115.137												672.336	130.914	185.896	486.439		2.86		0.00071077	0.000684542	0.000659281	0.00068072	0.000655601	0.000631408	0.000608108	0.000585667	0.000604919	0.000582596	0.000561097	0.000540392	0.00052045
						4.1	8848.98	#REF!	13.4521	13	0	0	5.36855	528.984	679.229	872.147	2.64492	117.782												679.229	124.021	190.499	488.73		2.88		0.00067844	0.000653404	0.000629292	0.000649538	0.000625569	0.000602484	0.000580251	0.000558839	0.000577012	0.00055572	0.000535213	0.000515462	0.000496441
						4.12	8881.67	#REF!	13.5177	13.5	0	0	4.26745	533.251	684.708	879.183	2.66626	120.448												684.708	118.541	195.165	489.543		2.9		0.000647584	0.000623687	0.000600672	0.00061979	0.000596919	0.000574891	0.000553677	0.000533245	0.000550401	0.00053009	0.000510528	0.000491689	0.000473545
						4.14	8914.06	#REF!	13.5833	13.5	0	0	4.26745	537.519	690.188	886.219	2.68759	123.135												690.188	113.062	199.895	490.293		2.92		0.00061814	0.000595329	0.000573361	0.000591414	0.00056959	0.000548571	0.000528328	0.000508831	0.000525026	0.000505652	0.000486992	0.000469022	0.000451714
						4.16	8946.18	#REF!	13.649	13.5	0	0	4.26745	541.786	695.667	893.255	2.70893	125.844												695.667	107.582	204.689	490.979		2.94		0.000590047	0.000568273	0.000547303	0.000564351	0.000543525	0.000523468	0.000504151	0.000485547	0.000500835	0.000482354	0.000464554	0.000447411	0.000430901
						4.18	8978.02	#REF!	13.7146	13.5	0	0	4.26745	546.054	701.147	900.291	2.73027	128.575												701.147	102.103	209.546	491.601		2.96		0.000563245	0.00054246	0.000522443	0.000538542	0.000518669	0.000499529	0.000481095	0.000463342	0.000477775	0.000460144	0.000443164	0.00042681	0.00041106
						4.2	9009.6	#REF!	13.7802	13.5	0	0	4.26745	550.321	706.627	907.326	2.75161	131.326												706.627	96.6232	214.468	492.159		2.98		0.000537679	0.000517837	0.000498728	0.000513932	0.000494967	0.000476701	0.00045911	0.000442168	0.000455794	0.000438974	0.000422775	0.000407174	0.000392148
						4.22	9040.91	#REF!	13.8458	13.5	0	0	4.26745	554.589	712.106	914.362	2.77294	134.099												712.106	91.1437	219.453	492.653		3		0.000513292	0.000494351	0.000476108	0.000490466	0.000472367	0.000454936	0.000438148	0.000421979	0.000434843	0.000418797	0.000403342	0.000388458	0.000374123
						4.24	9071.96	#REF!	13.9114	13.5	0	0	4.26745	558.856	717.586	921.398	2.79428	136.894												717.586	85.6642	224.504	493.082		3.02		0.000490033	0.00047195	0.000454534	0.000468094	0.00045082	0.000434184	0.000418162	0.000402731	0.000414876	0.000399566	0.000384822	0.000370621	0.000356944
						4.26	9102.75	#REF!	13.9771	13.5	0	0	4.26745	563.124	723.065	928.434	2.81562	139.709												723.065	80.1847	229.619	493.446		3.04		0.000467851	0.000450586	0.000433959	0.000446765	0.000430278	0.0004144	0.000399108	0.00038438	0.000395847	0.00038124	0.000367171	0.000353622	0.000340573
						4.28	9133.3	#REF!	14.0427	14	0	0	4.35794	567.482	728.661	935.619	2.83741	142.547												728.661	74.589	234.799	493.862		3.06		0.000446697	0.000430213	0.000414338	0.000426433	0.000410697	0.000395541	0.000380945	0.000366887	0.000377714	0.000363776	0.000350352	0.000337423	0.000324972
						4.3	9163.6	#REF!	14.1083	14	0	0	4.35794	571.84	734.256	942.804	2.8592	145.406												734.256	68.9933	240.043	494.213		3.08		0.000426526	0.000410786	0.000395627	0.000407052	0.000392031	0.000377564	0.000363631	0.000350213	0.000360436	0.000347135	0.000334325	0.000321988	0.000310106
						4.32	9193.66	#REF!	14.1739	14	0	0	4.35794	576.197	739.852	949.989	2.88099	148.287												739.852	63.3976	245.353	494.499		3.1		0.000407291	0.000392262	0.000377786	0.000388578	0.000374238	0.000360428	0.000347128	0.000334318	0.000343972	0.000331279	0.000319054	0.00030728	0.000295941
						4.34	9223.48	#REF!	14.2395	14	0	0	4.35794	580.555	745.448	957.174	2.90278	151.19												745.448	57.8019	250.728	494.719		3.12		0.000388951	0.000374598	0.000360774	0.000370968	0.000357278	0.000344094	0.000331396	0.000319167	0.000328284	0.00031617	0.000304502	0.000293266	0.000282444
						4.36	9253.06	#REF!	14.3052	14	0	0	4.35794	584.913	751.044	964.359	2.92457	154.114												750.734	52.5157	256.169	494.565		3.14		0.000371462	0.000357754	0.000344553	0.000354182	0.000341112	0.000328525	0.000316401	0.000304726	0.000313335	0.000301773	0.000290637	0.000279912	0.000269582
						4.38	9282.42	#REF!	14.3708	14	0	0	4.35794	589.271	756.639	971.544	2.94636	157.06												755.604	47.6462	261.676	493.928		3.16		0.000354786	0.000341694	0.000329085	0.000338182	0.000325703	0.000313684	0.000302108	0.00029096	0.000299091	0.000288054	0.000277425	0.000267187	0.000257327
						4.4	9311.55	#REF!	14.4364	14	0	0	4.35794	593.629	762.235	978.729	2.96815	160.029												760.09	43.1594	267.248	492.842		3.18		0.000338885	0.00032638	0.000314336	0.000322931	0.000311014	0.000299537	0.000288483	0.000277838	0.000285518	0.000274982	0.000264835	0.000255062	0.00024565
						4.42	9340.46	#REF!	14.502	14.5	0	0	7.06072	600.69	771.301	990.37	3.00345	163.032												764.226	39.0239	272.886	491.34		3.2		0.000323749	0.000311802	0.000300296	0.000308418	0.000297037	0.000286075	0.000275519	0.000265351	0.000272607	0.000262547	0.000252859	0.000243528	0.000234541
						4.44	9369.15	#REF!	14.5676	14.5	0	0	7.06072	607.751	780.367	1002.01	3.03875	166.071												768.039	35.2106	278.59	489.449		3.22		0.000309339	0.000297924	0.00028693	0.000294605	0.000283734	0.000273264	0.00026318	0.000253468	0.000260323	0.000250716	0.000241465	0.000232554	0.000223972
						4.46	9397.63	#REF!	14.6333	14.5	0	0	7.06072	614.811	789.433	1013.65	3.07406	169.145												771.557	31.693	284.361	487.196		3.24		0.000295618	0.000284709	0.000274202	0.000281457	0.000271071	0.000261068	0.000251434	0.000242155	0.000248633	0.000239458	0.000230622	0.000222111	0.000213915
						4.48	9425.9	#REF!	14.6989	14.5	0	0	7.06072	621.872	798.5	1025.29	3.10936	172.254												774.803	28.4468	290.198	484.605		3.26		0.000282549	0.000272122	0.000262081	0.000268938	0.000259014	0.000249456	0.000240251	0.000231385	0.000237507	0.000228742	0.000220301	0.000212172	0.000204342
						4.5	9453.96	#REF!	14.7645	14.5	0	0	7.06072	628.933	807.566	1036.93	3.14466	175.399												777.8	25.4497	296.102	481.698		3.28		0.0002701	0.000260133	0.000250533	0.000257017	0.000247533	0.000238398	0.000229601	0.000221128	0.000226915	0.000218541	0.000210476	0.000202709	0.000195229
						4.52	9481.81	#REF!	14.8301	14.5	0	0	7.06072	635.994	816.632	1048.58	3.17997	178.579												780.568	22.6815	302.073	478.496		3.3		0.000258239	0.00024871	0.000239532	0.000245663	0.000236597	0.000227867	0.000219458	0.000211359	0.000216829	0.000208828	0.000201122	0.0001937	0.000186552
						4.54	9509.46	#REF!	14.8957	14.5	0	0	0	635.994	816.632	1048.58	3.17997	181.759												783.126	20.1239	308.11	475.016		3.32		0.000246889	0.000237779	0.000229004	0.000234801	0.000226136	0.000217791	0.000209754	0.000202014	0.000207185	0.000199539	0.000192176	0.000185084	0.000178254
						4.56	9536.92	#REF!	14.9614	14.5	0	0	0	635.994	816.632	1048.58	3.17997	184.939												785.489	17.7603	314.215	471.275		3.34		0.00023603	0.00022732	0.000218932	0.000224412	0.000216131	0.000208155	0.000200474	0.000193076	0.000197963	0.000190658	0.000183622	0.000176846	0.00017032
						4.58	9564.18	#REF!	15.027	15	0	0	0	635.994	816.632	1048.58	3.17997	188.119												787.674	15.5753	320.387	467.288		3.36		0.000225643	0.000217316	0.000209297	0.000214478	0.000206563	0.000198941	0.0001916	0.000184529	0.000189149	0.000182169	0.000175446	0.000168972	0.000162737
						4.6	9591.25	#REF!	15.0926	15	0	0	0	635.994	816.632	1048.58	3.17997	191.299												789.695	13.5548	326.626	463.069		3.38		0.000215709	0.000207749	0.000200082	0.000204981	0.000197417	0.000190132	0.000183115	0.000176358	0.000180724	0.000174055	0.000167632	0.000161446	0.000155488
						4.62	9618.13	#REF!	15.1582	15	0	0	0	635.994	816.632	1048.58	3.17997	194.479												791.564	11.6858	332.933	458.631		3.4		0.00020621	0.000198601	0.000191272	0.000195902	0.000188673	0.000181711	0.000175005	0.000168547	0.000172673	0.000166301	0.000160165	0.000154254	0.000148562
						4.64	9644.82	#REF!	15.2238	15	0	0	0	635.994	816.632	1048.58	3.17997	197.659												793.293	9.9564	339.308	453.986		3.42		0.000197129	0.000189854	0.000182848	0.000187226	0.000180317	0.000173663	0.000167254	0.000161082	0.000164982	0.000158894	0.00015303	0.000147383	0.000141944
						4.66	9671.33	#REF!	15.2895	15	0	0	0	635.994	816.632	1048.58	3.17997	200.839												794.894	8.3556	345.75	449.144		3.44		0.000188448	0.000181494	0.000174796	0.000178934	0.000172331	0.000165972	0.000159847	0.000153948	0.000157634	0.000151817	0.000146214	0.000140819	0.000135622
						4.68	9697.67	#REF!	15.3551	15	0	0	0	635.994	816.632	1048.58	3.17997	204.019												796.376	6.87335	352.261	444.116		3.46		0.000180151	0.000173503	0.0001671	0.000171012	0.000164701	0.000158623	0.00015277	0.000147132	0.000150615	0.000145057	0.000139704	0.000134549	0.000129584
						4.7	9723.82	#REF!	15.4207	15	0	0	0	635.994	816.632	1048.58	3.17997	207.199												797.749	5.50038	358.84	438.91		3.48
						4.72	9749.8	#REF!	15.4863	15	0	0	0	635.994	816.632	1048.58	3.17997	210.379												799.022	4.22819	365.487	433.535		3.5
						4.74	9775.61	#REF!	15.5519	15.5	0	0	0	635.994	816.632	1048.58	3.17997	213.558												800.201	3.04896	372.202	427.998		3.52
						4.76	9801.24	#REF!	15.6176	15.5	0	0	0	635.994	816.632	1048.58	3.17997	216.738												801.294	1.9555	378.987	422.308		3.54
						4.78	9826.71	#REF!	15.6832	15.5	0	0	0	635.994	816.632	1048.58	3.17997	219.918												802.309	0.941204	385.84	416.469		3.56
						4.8	9852.02	#REF!	15.7488	15.5	0	0	0	635.994	816.632	1048.58	3.17997	223.098												803.25	0	392.762	410.488		3.58
						4.82	9877.16	#REF!	15.8144	15.5	0	0	0	635.994	816.632	1048.58	3.17997	226.278																	3.6
						4.84	9902.15	#REF!	15.88	15.5	0	0	0	635.994	816.632	1048.58	3.17997	229.458																	3.62
						4.86	9926.97	#REF!	15.9457	15.5	0	0	0	635.994	816.632	1048.58	3.17997	232.638																	3.64
						4.88	9951.64	#REF!	16.0113	16	0	0	0	635.994	816.632	1048.58	3.17997	235.818																	3.66
						4.9	9976.16	#REF!	16.0769	16	0	0	0	635.994	816.632	1048.58	3.17997	238.998																	3.68
						4.92	10000.5	#REF!	16.1425	16	0	0	0	635.994	816.632	1048.58	3.17997	242.178																	3.7
						4.94	10024.7	#REF!	16.2081	16	0	0	0	635.994	816.632	1048.58	3.17997	245.358																	3.72
						4.96	10048.8	#REF!	16.2738	16	0	0	0	635.994	816.632	1048.58	3.17997	248.538																	3.74
							0
							0
							0
							0
							0
							0
							0
							0
							0
							0
							0
							0
							0
							0
							0
							0
							0
							0
							0
							0
							0
							0
							0
							0
[truncated: 139 more columns]

## Sheet: Bridgeport_2
																																					0.939481	0.933979	0.899514	0.956937	0.921624	0.887615	0.85486	0.823314	0.876425	0.844084	0.812935	0.782937	0.754045
																																					0	1	2	3	4	5	6	7	8	9	10	11	12
	INPUTS			ERROR CHECK		Surge height (m)	Wall Length (m)	sum of middleH * dL	Surge height (ft)	Rounding (ft)	delta Area (sq m)	Building numbers	Building Values (million $)	Cum Value	2080	2130	Marginal Damage	Damage	2030	Expected Benefit (million $, PV)	Residual Dam (million $, PV)	Cost (Million $)	Net Benefit (million $, PV)	2080	Expected Benefit (million $, PV)	Residual Dam (million $, PV)	Cost (Million $)	Net Benefit (million $, PV)	2130	Expected Benefit (million $, PV)	Residual Dam (million $, PV)	Cost (million $)	Net Benefit (million $, PV)		Surge height (m)		0	1	2	3	4	5	6	7	8	9	10	11	12
	SPATIAL DATA					1.8	1494.05	#REF!	5.9058	5.5	0	0	0	0	0	0	0	0		0	37.6767	3.95166	-3.95166		0	308.561	0.01	-0.01		0	0	0.01	-0.01		1.8		0	0	0	0	0	0	0	0	0	0	0	0	0
	Target City	Bridgeport				1.82	1539.75	#REF!	5.97142	5.5	0	0	0	0	0	0	0	0		0	37.6767	4.31561	-4.31561		0	308.561	0.01	-0.01		0	0	0.01	-0.01		1.82		0	0	0	0	0	0	0	0	0	0	0	0	0
	Policy Year (base year: 2020)	#REF!				1.84	1587.39	#REF!	6.03704	6	0	0	0	0	0	0	0	0		0	37.6767	4.707	-4.707		0	308.561	0.01	-0.01		0	0	0.01	-0.01		1.84		0	0	0	0	0	0	0	0	0	0	0	0	0
	SLR rate (before policy)	3.14	mm/year			1.86	1637.14	#REF!	6.10266	6	0	0	0	0	0	0	0	0		0	37.6767	5.12795	-5.12795		0	308.561	1.14714	-1.14714		0	0	0.01	-0.01		1.86		0	0	0	0	0	0	0	0	0	0	0	0	0
	SLR rate (after policy)	#REF!	mm/year			1.88	1689.16	#REF!	6.16828	6	0	0	0	0	0	0	0	0		0	37.6767	5.58077	-5.58077		0	308.561	1.32273	-1.32273		0	0	0.01	-0.01		1.88		0	0	0	0	0	0	0	0	0	0	0	0	0
	MHHW	1.06	meter			1.9	1743.66	#REF!	6.2339	6	0	0	0	0	0	0	0	0		0	37.6767	6.06801	-6.06801		0	308.561	1.517	-1.517		0	0	0.01	-0.01		1.9		0	0	0	0	0	0	0	0	0	0	0	0	0
						1.92	1800.81	#REF!	6.29952	6	0	0	0	0	0	0	0	0		0	37.6767	6.59242	-6.59242		0	308.561	1.73154	-1.73154		0	0	0.01	-0.01		1.92		0	0	0	0	0	0	0	0	0	0	0	0	0
						1.94	1860.84	#REF!	6.36514	6	0	0	0	0	0	0	0	0		0	37.6767	7.15702	-7.15702		0	308.561	1.96807	-1.96807		0	0	0.01	-0.01		1.94		0	0	0	0	0	0	0	0	0	0	0	0	0
	GEV ESTIMATION					1.96	1923.92	#REF!	6.43076	6	0	0	0	0	0	0	0	0		0	37.6767	7.76501	-7.76501		0	308.561	2.22848	-2.22848		0	0	0.01	-0.01		1.96		0	0	0	0	0	0	0	0	0	0	0	0	0
	μ (location)	1.845				1.98	1990.24	#REF!	6.49638	6	0	0	0	0	0	0	0	0		0	37.6767	8.41973	-8.41973		0	308.561	2.51476	-2.51476		0	0	0.01	-0.01		1.98		0	0	0	0	0	0	0	0	0	0	0	0	0
	σ (scale)	0.1544				2	2059.92	#REF!	6.562	6.5	0	0	2.22835	2.22835	2.86126	3.67393	0.0111418	0.0111418		0.0612981	37.6154	9.12457	-9.06327		0.288583	308.273	2.82904	-2.54046		0	0	0.01	-0.01		2		0.000864794	0.000832882	0.000802147	0.000904455	0.000871079	0.000838934	0.000807976	0.00077816	0.000883033	0.000850447	0.000819064	0.000788839	0.000759729
	k (shape)	0.0752				2.02	2133.03	#REF!	6.62762	6.5	0	0	2.22835	4.4567	5.72252	7.34786	0.0222835	0.0334253		0.214268	37.4625	9.88275	-9.66848		1.25181	307.31	3.17346	-1.92165		0	0	0.01	-0.01		2.02		0.00223194	0.00214958	0.00207025	0.00231764	0.00223211	0.00214974	0.00207041	0.00199401	0.00224833	0.00216537	0.00208546	0.0020085	0.00193438
						2.04	2209.5	#REF!	6.69324	6.5	0	0	2.22835	6.68506	8.58378	11.0218	0.0334253	0.0668506		0.469603	37.2071	10.6971	-10.2275		3.07037	305.491	3.5501	-0.479734		0	0	0.01	-0.01		2.04		0.00387078	0.00372794	0.00359037	0.00398771	0.00384056	0.00369884	0.00356234	0.00343088	0.00384086	0.00369912	0.00356262	0.00343115	0.00330454
	Coefficients of the cost function					2.06	2289.1	#REF!	6.75886	6.5	0	0	2.22835	8.91341	11.445	14.6957	0.044567	0.111418		0.826155	36.8506	11.5696	-10.7434		6.31059	302.251	3.96084	2.34976		0	0	0.130937	-0.130937		2.06		0.00564251	0.00543429	0.00523376	0.00576313	0.00555046	0.00534564	0.00514838	0.00495839	0.00550713	0.00530391	0.00510818	0.00491968	0.00473814
	coef1	0.478344				2.08	2371.43	#REF!	6.82448	6.5	0	0	2.22835	11.1418	14.3063	18.3697	0.0557088	0.167126		1.27629	36.4004	12.5011	-11.2248		11.3466	297.215	4.40714	6.93943		0	0	0.0868134	-0.0868134		2.08		0.00747115	0.00719545	0.00692992	0.00756093	0.00728192	0.0070132	0.0067544	0.00650515	0.00716313	0.00689879	0.00664421	0.00639903	0.00616289
	coef2	0.0014616				2.1	2455.84	#REF!	6.8901	6.5	0	0	2.22835	13.3701	17.1676	22.0436	0.0668506	0.233977		1.80947	35.8673	13.4912	-11.6817		17.1676	291.394	4.88991	12.2777		0	0	0.0505708	-0.0505708		2.1		0.00932258	0.00897856	0.00864723	0.00934387	0.00899906	0.00866698	0.00834715	0.00803913	0.00877114	0.00844747	0.00813574	0.00783551	0.00754637
	coef3	-4.79265e-07		Buildings exist under MHHW		2.12	2541.5	#REF!	6.95572	6.5	0	0	2.22835	15.5985	20.0288	25.7175	0.0779923	0.311969		2.41453	35.2622	14.5374	-12.1228		20.0288	288.533	5.40936	14.6195		0	0	0.0232598	-0.0232598		2.12		0.0111897	0.0107768	0.0103791	0.0111042	0.0106944	0.0102998	0.00991969	0.00955363	0.0103233	0.00994234	0.00957545	0.0092221	0.00888179
	coef4	6.22975e-11				2.14	2627.42	#REF!	7.02134	7	0	0	1.81658	17.415	22.3614	28.7125	0.0870752	0.399044		3.07772	34.599	15.636	-12.5583		22.3614	286.2	5.96495	16.3964		0	0	0.00601154	-0.00601154		2.14		0.0130147	0.0125345	0.0120719	0.0127861	0.0123143	0.0118599	0.0114222	0.0110007	0.0117692	0.0113349	0.0109167	0.0105138	0.0101258
	q	3.73333e+06				2.16	2712.61	#REF!	7.08696	7	0	0	1.81658	19.2316	24.6939	31.7076	0.0961581	0.495203		3.78832	33.8884	16.7822	-12.9939		24.6939	283.868	6.55556	18.1383		0	0	0	0		2.16		0.014855	0.0143068	0.0137789	0.0144281	0.0138956	0.0133829	0.012889	0.0124134	0.0131478	0.0126626	0.0121954	0.0117453	0.0113119
	Growth Rate	0.005	%/year			2.18	2796.14	#REF!	7.15258	7	0	0	1.81658	21.0482	27.0264	34.7026	0.105241	0.600443		4.53786	33.1389	17.9708	-13.4329		27.0264	281.535	7.17967	19.8467		0	0	0.00639757	-0.00639757		2.18		0.0164942	0.0158856	0.0152994	0.0160906	0.0154969	0.014925	0.0143742	0.0138438	0.0144961	0.0139611	0.0134459	0.0129498	0.0124719
	discount rate	0.0426	%/year			2.2	2877.26	#REF!	7.2182	7	0	0	1.81658	22.8648	29.3589	37.6976	0.114324	0.714767		5.31923	32.3575	19.1966	-13.8773		29.3589	279.202	7.83563	21.5233		0	0	0.0263327	-0.0263327		2.2		0.0179139	0.0172529	0.0166162	0.0175403	0.016893	0.0162696	0.0156692	0.015091	0.0158715	0.0152858	0.0147217	0.0141785	0.0136553
	useful_life	30	years			2.22	2955.44	#REF!	7.28382	7	0	0	1.81658	24.6813	31.6915	40.6927	0.123407	0.838174		6.1262	31.5505	20.4552	-14.329		31.6915	276.87	8.52188	23.1696		0	0	0.0608585	-0.0608585		2.22		0.0191065	0.0184014	0.0177224	0.018766	0.0180735	0.0174066	0.0167642	0.0161456	0.0170435	0.0164145	0.0158088	0.0152254	0.0146636
	CapEx	0.005				2.24	3030.35	#REF!	7.34944	7	0	0	1.81658	26.4979	34.024	43.6877	0.13249	0.970664		6.95309	30.7236	21.7433	-14.7902		34.024	274.537	9.23709	24.7869		0	0	0.110935	-0.110935		2.24		0.020073	0.0193323	0.0186189	0.0197664	0.019037	0.0183345	0.0176579	0.0170063	0.0180077	0.0173432	0.0167032	0.0160869	0.0154932
	Difference	0.02	meter			2.26	3101.86	#REF!	7.41506	7	0	0	1.81658	28.3145	36.3565	46.6827	0.141572	1.11224		7.79496	29.8818	23.0583	-15.2634		36.3565	272.205	9.98023	26.3763		0	0	0.177426	-0.177426		2.26		0.0208213	0.0200529	0.0193129	0.0205472	0.019789	0.0190587	0.0183554	0.0176781	0.0187676	0.018075	0.017408	0.0167656	0.0161469
	Minimum height where buildings locate	6.5	ft			2.28	3169.96	#REF!	7.48068	7	0	0	1.81658	30.1311	38.6891	49.6777	0.150655	1.26289		8.64739	29.0293	24.3986	-15.7512		38.6891	269.872	10.7506	27.9385		0	0	0.261103	-0.261103		2.28		0.0213638	0.0205754	0.0198161	0.0211197	0.0203404	0.0195898	0.0188669	0.0181706	0.0193319	0.0186185	0.0179315	0.0172697	0.0166325
	A factor to account for other damages than buildings	2				2.3	3234.74	#REF!	7.5463	7.5	0	0	2.93526	33.0663	42.458	54.5172	0.165332	1.42822		9.50992	28.1668	25.7632	-16.2533		42.458	266.103	11.5476	30.9105		0	0	0.362654	-0.362654		2.3		0.0218015	0.020997	0.0202222	0.0215834	0.0207869	0.0200198	0.0192811	0.0185696	0.0197911	0.0190608	0.0183574	0.01768	0.0170276
	Ratio of houses w/ basements	1	(1=All have basements; 0=No basements)			2.32	3296.37	#REF!	7.61192	7.5	0	0	2.93526	36.0016	46.227	59.3566	0.180008	1.60823		10.3813	27.2954	27.1516	-16.7702		46.227	262.334	12.3709	33.856		0	0	0.482694	-0.482694		2.32		0.0221269	0.0213104	0.020524	0.0219306	0.0211213	0.0203419	0.0195913	0.0188683	0.0201384	0.0193952	0.0186795	0.0179902	0.0173263
	Average height of the first floor	0.9	meter			2.34	3355.03	#REF!	7.67754	7.5	0	0	2.93526	38.9369	49.9959	64.196	0.194684	1.80292		11.2599	26.4168	28.5636	-17.3036		49.9959	258.565	13.2205	36.7754		0	0	0.621781	-0.621781		2.34		0.0223377	0.0215134	0.0207195	0.0221595	0.0213417	0.0205542	0.0197957	0.0190652	0.0203719	0.0196201	0.0188961	0.0181988	0.0175272
	Coastal length 12ft	4422.23				2.36	3410.92	#REF!	7.74316	7.5	0	0	2.93526	41.8721	53.7649	69.0354	0.209361	2.01228		12.1435	25.5332	29.9993	-17.8558		53.7649	254.797	14.0963	39.6686		0	0	0.780418	-0.780418		2.36		0.0224358	0.0216079	0.0208105	0.0222721	0.0214502	0.0206587	0.0198963	0.0191621	0.0204939	0.0197376	0.0190093	0.0183078	0.0176322
	OUTPUTS	2030	20800	2130		2.38	3464.24	#REF!	7.80878	7.5	0	0	2.93526	44.8074	57.5338	73.8749	0.224037	2.23631		13.0297	24.647	31.459	-18.4293		57.5338	251.028	14.9983	42.5355		0	0	0.959067	-0.959067		2.38		0.0224265	0.0215989	0.0208018	0.022274	0.0214521	0.0206604	0.019898	0.0191638	0.0205097	0.0197529	0.0190239	0.0183219	0.0176458
	Optimal Level of Flood Defense	No_Wall	3.36	3.66		2.4	3515.17	#REF!	7.8744	7.5	0	0	2.93526	47.7426	61.3028	78.7143	0.238713	2.47503		13.9156	23.7611	32.943	-19.0273		61.3028	247.259	15.9266	45.3762		0	0	1.15815	-1.15815		2.4		0.0223168	0.0214933	0.0207001	0.0221727	0.0213545	0.0205665	0.0198076	0.0190766	0.0204267	0.0196729	0.018947	0.0182478	0.0175744
	Maximum height of Walls					2.42	3563.91	#REF!	7.94002	7.5	0	0	2.93526	50.6779	65.0717	83.5537	0.253389	2.72842		14.7981	22.8786	34.4516	-19.6535		65.0717	243.49	16.8813	48.1904		0	0	1.37807	-1.37807		1.2		0.0221156	0.0212995	0.0205135	0.0219773	0.0211663	0.0203852	0.019633	0.0189085	0.0202536	0.0195062	0.0187864	0.0180932	0.0174255
	Average height of Walls	#VALUE!	1.85	1.5		2.44	3610.63	#REF!	8.00564	8	0	0	3.14323	53.8211	69.1077	88.736	0.269106	2.99752		15.6743	22.0024	35.9854	-20.3111		69.1077	239.454	17.8626	51.2451		0	0	1.61918	-1.61918		1.22		0.0218397	0.0210338	0.0202576	0.0217051	0.0209041	0.0201327	0.0193898	0.0186743	0.0200069	0.0192686	0.0185575	0.0178727	0.0172132
	Average Elevation of wall	1.12	1.51	2.16		2.46	3655.47	#REF!	8.07126	8	0	0	3.14323	56.9644	73.1437	93.9184	0.284822	3.28234		16.5412	21.1355	37.5447	-21.0035		73.1437	235.418	18.8706	54.2731		0	379.409	1.88183	-1.88183		1.24		0.0214968	0.0207035	0.0199395	0.0213639	0.0205755	0.0198163	0.019085	0.0183807	0.0196941	0.0189673	0.0182674	0.0175933	0.0169441
	Wall Length	No_Wall	4282.23	4432.23		2.48	3698.57	#REF!	8.13688	8	0	0	3.14323	60.1076	77.1797	99.1007	0.300538	3.58288		17.3954	20.2813	39.1298	-21.7344		77.1797	231.382	19.9055	57.2742		0	379.409	2.16636	-2.16636		1.26		0.0210947	0.0203162	0.0195665	0.020962	0.0201885	0.0194435	0.018726	0.018035	0.0193233	0.0186102	0.0179235	0.0172621	0.0166251
	Cost of Wall	No_Wall	83.8319	57.0428		2.5	3740.07	#REF!	8.2025	8	0	0	3.14323	63.2508	81.2157	104.283	0.316254	3.89914		18.2338	19.4429	40.7413	-22.5075		81.2157	227.346	20.9675	60.2482		0	379.409	2.47306	-2.47306		1.28		0.0206413	0.0198796	0.019146	0.0205078	0.0197511	0.0190222	0.0183203	0.0176442	0.0189026	0.0182051	0.0175333	0.0168863	0.0162631
	Expected Benefit	No_Wall	283.879	319.604		2.52	3780.09	#REF!	8.26812	8	0	0	3.14323	66.3941	85.2517	109.465	0.33197	4.23111		19.0536	18.6231	42.3794	-23.3257		85.2517	223.31	22.0567	63.1949		0	379.409	2.80223	-2.80223		1.3		0.0201447	0.0194013	0.0186854	0.0200095	0.0192711	0.0185599	0.017875	0.0172154	0.0184399	0.0177594	0.0171041	0.0164729	0.015865
	Net Benefit	#VALUE!	200.047	262.562		2.54	3818.73	#REF!	8.33374	8	0	0	3.14323	69.5373	89.2877	114.648	0.347686	4.57879		19.8528	17.8239	44.0445	-24.1917		89.2877	219.274	23.1734	66.1143		0	379.409	3.15415	-3.15415		1.32		0.0196123	0.0188885	0.0181915	0.0194746	0.018756	0.0180639	0.0173973	0.0167553	0.0179426	0.0172805	0.0166428	0.0160286	0.0154371
	Residual Damage	37.6767	24.6826	59.804		2.56	3856.08	#REF!	8.39936	8	0	0	3.14323	72.6805	93.3236	119.83	0.363403	4.94219		20.6294	17.0474	45.7369	-25.1075		93.3236	215.238	24.3176	69.0061		0	379.409	3.52908	-3.52908		1.34		0.0190511	0.0183481	0.017671	0.0189107	0.0182129	0.0175408	0.0168935	0.0162701	0.0174177	0.016775	0.0161559	0.0155598	0.0149856
	Expected Damage	37.6767	308.561	379.409		2.58	3892.23	#REF!	8.46498	8	0	0	3.14323	75.8238	97.3596	125.012	0.379119	5.32131		21.382	16.2947	47.457	-26.075		97.3596	211.202	25.4895	71.8701		0	379.409	3.92729	-3.92729		1.36		0.0184678	0.0177863	0.0171299	0.0183244	0.0176482	0.016997	0.0163698	0.0157657	0.0168717	0.0162491	0.0156495	0.015072	0.0145158
						2.6	3902.23	#REF!	8.5306	8.5	0	0	5.76915	81.5929	104.767	134.524	0.407965	5.72928		22.1113	15.5654	48.8914	-26.7801		104.767	203.794	26.5193	78.2481		43.1949	336.214	4.3213	38.8736		1.38		0.0179093	0.0172484	0.0166119	0.0177626	0.0171071	0.0164758	0.0158679	0.0152823	0.016348	0.0157447	0.0151637	0.0146041	0.0140652
	Surge height (ft)	Area submerged (sq m)	delta Area (sq m)	Building numbers	Building Values (million $)	2.62	3912.23	#REF!	8.59622	8.5	0	0	5.76915	87.3621	112.175	144.036	0.43681	6.16609		22.1669	15.5098	50.3504	-28.1835		112.175	196.386	27.5719	84.6032		46.4881	332.92	4.73517	41.753		1.38		0.0192747	0.0185634	0.0178784	0.0191169	0.0184114	0.017732	0.0170777	0.0164475	0.0175944	0.0169451	0.0163198	0.0157176	0.0151376
0.9144	3	17999.1	0	0	0	2.64	3922.23	#REF!	8.66184	8.5	0	0	5.76915	93.1312	119.583	153.547	0.465656	6.63174		22.9266	14.7501	51.8342	-28.9076		119.583	188.979	28.6474	90.9354		119.583	259.826	5.16906	114.414		1.4		0.0186805	0.0179911	0.0173272	0.018519	0.0178356	0.0171774	0.0165435	0.0159331	0.0170368	0.0164081	0.0158026	0.0152194	0.0146578
1.0668	3.5	20451.9	2452.8	0	0	2.66	3932.23	#REF!	8.72746	8.5	0	0	5.76915	98.9004	126.991	163.059	0.494502	7.12625		23.6613	14.0154	53.3429	-29.6815		126.991	181.571	29.7461	97.2445		126.991	252.418	5.62309	121.368		1.42		0.0180974	0.0174295	0.0167864	0.0179322	0.0172704	0.0166331	0.0160193	0.0154282	0.0164893	0.0158808	0.0152948	0.0147304	0.0141868
1.2192	4	26578.3	6126.4	0	0	2.68	3942.23	#REF!	8.79308	8.5	0	0	5.76915	104.67	134.398	172.571	0.523348	7.64959		24.3713	13.3054	54.8766	-30.5053		134.398	174.163	30.8681	103.53		134.398	245.01	6.0974	128.301		1.44		0.017523	0.0168764	0.0162536	0.0173542	0.0167138	0.016097	0.015503	0.0149309	0.0159501	0.0153615	0.0147946	0.0142487	0.0137229
1.3716	4.5	42289.9	15711.6	0	0	2.7	3952.23	#REF!	8.8587	8.5	0	0	5.76915	110.439	141.806	182.083	0.552193	8.20179		25.0567	12.6201	56.4355	-31.3788		141.806	166.755	32.0134	109.793		141.806	237.602	6.59213	135.214		1.46		0.016956	0.0163303	0.0157276	0.0167838	0.0161644	0.0155679	0.0149935	0.0144402	0.015418	0.014849	0.0143011	0.0137733	0.0132651
1.524	5	64548.3	22258.4	0	0	2.72	3962.23	#REF!	8.92432	8.5	0	0	5.76915	116.208	149.214	191.594	0.581039	8.78283		25.7176	11.9591	58.0197	-32.3021		149.214	159.348	33.1823	116.032		149.214	230.195	7.10741	142.106		1.48		0.0163956	0.0157906	0.0152079	0.0162203	0.0156218	0.0150453	0.0144901	0.0139554	0.0148925	0.014343	0.0138137	0.0133039	0.012813
1.6764	5.5	98033.6	33485.3	0	0	2.74	3972.23	#REF!	8.98994	8.5	0	0	5.76915	121.977	156.622	201.106	0.609885	9.39271		26.3545	11.3223	59.6294	-33.2749		156.622	151.94	34.3748	122.247		156.622	222.787	7.64339	148.978		1.5		0.0158418	0.0152572	0.0146942	0.0156638	0.0150857	0.014529	0.0139929	0.0134765	0.0143737	0.0138433	0.0133325	0.0128405	0.0123666
1.8288	6	121560	23526.3	0	0	2.76	3982.23	#REF!	9.05556	9	0	0	4.98181	126.959	163.018	209.32	0.634794	10.0275		26.9672	10.7095	61.2647	-34.2975		163.018	145.543	35.5912	127.427		163.018	216.39	8.20021	154.818		1.52		0.0152887	0.0147245	0.0141812	0.0151084	0.0145508	0.0140139	0.0134968	0.0129987	0.0138564	0.0133451	0.0128526	0.0123783	0.0119215
1.9812	6.5	211878	90317.8	127.961	15.5985	2.78	3992.23	#REF!	9.12118	9	0	0	4.98181	131.941	169.415	217.533	0.659703	10.6872		27.556	10.1208	62.9256	-35.3697		169.415	139.146	36.8315	132.584		169.415	209.993	8.77799	160.637		1.54		0.0147386	0.0141947	0.0136709	0.0145564	0.0140192	0.0135019	0.0130037	0.0125238	0.0133426	0.0128503	0.0123761	0.0119194	0.0114795
2.1336	7	296024	84146.3	119.217	14.5326	2.8	4002.23	#REF!	9.1868	9	0	0	4.98181	136.922	175.812	225.747	0.684612	11.3718		28.1211	9.55564	64.6125	-36.4914		175.812	132.75	38.0958	137.716		175.812	203.597	9.37687	166.435		1.56		0.0141934	0.0136696	0.0131652	0.0140098	0.0134929	0.0129949	0.0125154	0.0120536	0.0128343	0.0123607	0.0119046	0.0114653	0.0110422
2.286	7.5	414994	118970	168.555	20.5468	2.82	4012.23	#REF!	9.25242	9	0	0	4.98181	141.904	182.209	233.961	0.709521	12.0813		28.6629	9.01382	66.3254	-37.6625		182.209	126.353	39.3844	142.824		182.209	197.2	9.997	172.212		1.58		0.0136549	0.013151	0.0126657	0.0134705	0.0129734	0.0124946	0.0120336	0.0115895	0.0123331	0.011878	0.0114396	0.0110175	0.0106109
2.4384	8	560593	145599	206.283	25.1459	2.84	4022.23	#REF!	9.31804	9	0	0	4.98181	146.886	188.605	242.174	0.73443	12.8158		29.1819	8.49486	68.0644	-38.8825		188.605	119.956	40.6973	147.908		188.605	190.803	10.6385	177.967		1.6		0.0131247	0.0126404	0.0121739	0.0129399	0.0124624	0.0120025	0.0115596	0.011133	0.0118404	0.0114034	0.0109826	0.0105773	0.010187
2.5908	8.5	827828	267235	378.615	46.1532	2.86	4032.23	#REF!	9.38366	9	0	0	4.98181	151.868	195.002	250.388	0.759339	13.5751		29.6784	7.99828	69.8296	-40.1512		195.002	113.559	42.0348	152.967		195.002	184.406	11.3015	183.701		1.62		0.0126042	0.0121391	0.0116911	0.0124194	0.0119611	0.0115197	0.0110946	0.0106852	0.0113574	0.0109383	0.0105347	0.0101459	0.00977154
2.7432	9	1.02975e+06	201919	286.076	34.8727	2.88	4042.23	#REF!	9.44928	9	0	0	4.98181	156.85	201.399	258.601	0.784248	14.3594		30.1532	7.5235	71.6213	-41.4681		201.399	107.162	43.3968	158.002		201.399	178.01	11.9862	189.413		1.64		0.0120945	0.0116482	0.0112184	0.0119102	0.0114707	0.0110474	0.0106397	0.0102471	0.0108854	0.0104837	0.0100968	0.00972424	0.00936539
2.8956	9.5	1.17236e+06	142618	202.06	24.6311	2.9	4052.23	#REF!	9.5149	9.5	0	0	3.07889	159.929	205.352	263.678	0.799643	15.159		30.6065	7.07023	73.4396	-42.8331		205.352	103.209	44.7837	160.569		205.352	174.056	12.6927	192.66		1.66		0.0115894	0.0111617	0.0107499	0.0114061	0.0109852	0.0105798	0.0101894	0.00981336	0.0104185	0.0100341	0.00966378	0.00930717	0.00896372
3.048	10	1.30514e+06	132773	188.111	22.9307	2.92	4062.23	#REF!	9.58052	9.5	0	0	3.07889	163.007	209.306	268.754	0.815037	15.974		31.0387	6.63803	75.2845	-44.2458		209.306	99.2557	46.1954	163.11		209.306	170.103	13.4211	195.885		1.68		0.0110917	0.0106824	0.0102882	0.0109098	0.0105072	0.0101195	0.00974606	0.00938641	0.00995938	0.00959186	0.0092379	0.00889701	0.00856869
3.2004	10.5	1.40231e+06	97167.6	137.666	16.7815	2.94	4072.23	#REF!	9.64614	9.5	0	0	3.07889	166.086	213.259	273.83	0.830432	16.8045		31.4503	6.22638	77.1562	-45.7059		213.259	95.3023	47.6322	165.627		213.259	166.149	14.1716	199.087		1.7		0.0106037	0.0102124	0.00983551	0.0104237	0.010039	0.00966855	0.00931176	0.00896814	0.00950999	0.00915905	0.00882107	0.00849555	0.00818205
3.3528	11	1.49806e+06	95754.3	135.664	16.5374	2.96	4082.23	#REF!	9.71176	9.5	0	0	3.07889	169.165	217.212	278.906	0.845826	17.6503		31.842	5.8347	79.0549	-47.2129		217.212	91.349	49.0941	168.118		217.212	162.196	14.9442	202.268		1.72		0.0101271	0.00975336	0.00939344	0.00994935	0.0095822	0.00922859	0.00888804	0.00856006	0.00907194	0.00873716	0.00841475	0.00810423	0.00780517
3.5052	11.5	1.55528e+06	57225.3	81.0761	9.88318	2.98	4092.23	#REF!	9.77738	9.5	0	0	3.07889	172.244	221.166	283.982	0.86122	18.5115		32.2144	5.46236	80.9808	-48.7664		221.166	87.3956	50.5814	170.584		221.166	158.243	15.7392	205.427		1.74		0.00966333	0.00930673	0.0089633	0.00948823	0.0091381	0.00880088	0.00847611	0.00816333	0.00864644	0.00832737	0.00802007	0.00772412	0.00743908
3.6576	12	1.61526e+06	59974.4	84.971	10.358	3	4102.23	#REF!	9.843	9.5	0	0	3.07889	175.323	225.119	289.059	0.876615	19.3881		32.5681	5.10867	82.9338	-50.3658		225.119	83.4422	52.0941	173.025		225.119	154.289	16.5567	208.562		1.76		0.00921351	0.00887351	0.00854606	0.00904133	0.00870769	0.00838636	0.00807688	0.00777883	0.0082344	0.00793053	0.00763788	0.00735603	0.00708458
3.81	12.5	1.67014e+06	54878.5	77.7512	9.47787	3.02	4112.23	#REF!	9.90862	9.5	0	0	3.07889	178.402	229.073	294.135	0.892009	20.2801		32.9038	4.77293	84.9142	-52.0105		229.073	79.4889	53.6324	175.44		229.073	150.336	17.3968	211.676		1.78		0.00877836	0.00845443	0.00814244	0.00860937	0.00829167	0.00798569	0.007691	0.00740719	0.00783646	0.00754728	0.00726877	0.00700054	0.00674221
3.9624	13	1.71598e+06	45846.8	64.9552	7.91804	3.04	4122.23	#REF!	9.97424	9.5	0	0	3.07889	181.481	233.026	299.211	0.907404	21.1875		33.2223	4.45444	86.9222	-53.6999		233.026	75.5355	55.1964	177.829		233.026	146.383	18.2597	214.766		1.8		0.00835843	0.00804999	0.00775293	0.00819285	0.00789052	0.00759934	0.00731891	0.00704883	0.00745305	0.00717801	0.00691313	0.00665802	0.00641233
4.1148	13.5	1.74956e+06	33580.3	47.5762	5.79953	3.06	4132.23	#REF!	10.0399	10	0	0	2.86634	184.347	236.706	303.937	0.921735	22.1093		33.5242	4.15249	88.9578	-55.4335		236.706	71.855	56.7863	179.92		236.706	142.702	19.1454	217.561		1.82		0.00795365	0.00766015	0.00737748	0.00779167	0.00750414	0.00722722	0.00696053	0.00670367	0.00708405	0.00682263	0.00657086	0.00632839	0.00609486
4.2672	14	1795074	45509.2	64.4769	7.85973	3.08	4142.23	#REF!	10.1055	10	0	0	2.86634	187.213	240.387	308.663	0.936067	23.0453		33.8103	3.86638	91.0211	-57.2108		240.387	68.1746	58.4022	181.985		240.387	139.022	20.0542	220.333		1.84		0.00756428	0.00728514	0.00701631	0.00740606	0.00713276	0.00686955	0.00661605	0.0063719	0.00672964	0.0064813	0.00624213	0.00601178	0.00578994
4.4196	14.5	1.84492e+06	49849.7	70.6264	8.60936	3.1	4152.23	#REF!	10.1711	10	0	0	2.86634	190.08	244.067	313.389	0.950399	23.9957		34.0813	3.59539	93.1124	-59.0311		244.067	64.4941	60.0443	184.023		244.067	135.341	20.9862	223.081		1.86		0.0071904	0.00692506	0.00666951	0.00703607	0.00677642	0.00652636	0.00628553	0.00605358	0.00638985	0.00615405	0.00592696	0.00570824	0.00549759
4.572	15	1.87734e+06	32416.6	45.9274	5.59855	3.12	4162.23	#REF!	10.2367	10	0	0	2.86634	192.946	247.748	318.114	0.964731	24.9605		34.3379	3.33884	95.2318	-60.8939		247.748	60.8137	61.7126	186.035		247.748	131.661	21.9414	225.806		1.88		0.00683198	0.00657986	0.00633705	0.00668164	0.00643508	0.00619761	0.00596891	0.00574864	0.00606459	0.00584079	0.00562526	0.00541767	0.00521775
4.7244	15.5	1.92052e+06	43180.2	61.1772	7.4575	3.14	4172.23	#REF!	10.3023	10	0	0	2.86634	195.812	251.428	322.84	0.979062	25.9395		34.5807	3.09605	97.3794	-62.7987		251.428	57.1332	63.4073	188.021		251.428	127.98	22.9201	228.508		1.9		0.00648887	0.00624942	0.0060188	0.0063426	0.00610855	0.00588313	0.00566603	0.00545694	0.00575367	0.00554135	0.00533687	0.00513993	0.00495025
4.8768	16	1.94922e+06	28700.4	40.6624	4.95674	3.16	4182.23	#REF!	10.368	10	0	0	2.86634	198.679	255.109	327.566	0.993394	26.9329		34.8104	2.86635	99.5553	-64.7449		255.109	53.4528	65.1286	189.98		255.109	124.3	23.9224	231.186		1.92		0.00616083	0.00593349	0.00571453	0.00601869	0.00579659	0.00558268	0.00537667	0.00517826	0.00545684	0.00525547	0.00506154	0.00487476	0.00469487
5.0292	16.5	1.96376e+06	14540.3	20.6005	2.5112	3.18	4192.23	#REF!	10.4336	10	0	0	2.86634	201.545	258.789	332.292	1.00773	27.9407		35.0276	2.6491	101.76	-66.732		258.789	49.7723	66.8766	191.912		258.789	120.619	24.9483	233.841		1.94		0.00584757	0.00563178	0.00542396	0.00570958	0.00549888	0.00529596	0.00510053	0.00491231	0.00517377	0.00498285	0.00479898	0.00462188	0.00445133
5.1816	17	1.98139e+06	17627.4	24.9743	3.04437	3.2	4202.23	#REF!	10.4992	10	0	0	2.86634	204.411	262.47	337.018	1.02206	28.9627		35.2331	2.44366	103.993	-68.7595		262.47	46.0919	68.6514	193.818		262.47	116.939	25.9981	236.471		1.96		0.00554872	0.00534396	0.00514676	0.00541489	0.00521507	0.00502263	0.00483728	0.00465878	0.0049041	0.00472313	0.00454884	0.00438098	0.00421931
5.334	17.5	2.0316e+06	50210.2	71.1372	8.67162	3.22	4212.23	#REF!	10.5648	10.5	0	0	2.39735	206.809	265.548	340.97	1.03404	29.9968		35.4273	2.24946	106.254	-70.8271		265.548	43.0136	70.4531	195.095		265.548	113.861	27.072	238.476		1.98		0.00526347	0.00506924	0.00488218	0.00513381	0.00494436	0.00476191	0.00458618	0.00441694	0.00464705	0.00447557	0.00431041	0.00415135	0.00399815
5.4864	18	2.05278e+06	21176.4	30.0025	3.6573	3.24	4222.23	#REF!	10.6304	10.5	0	0	2.39735	209.206	268.626	344.923	1.04603	31.0428		35.6108	2.06592	108.545	-72.9341		268.626	39.9354	72.282	196.344		268.626	110.782	28.1699	240.456		2		0.0049915	0.0048073	0.0046299	0.00486598	0.00468642	0.00451348	0.00434692	0.00418651	0.00440229	0.00423984	0.00408338	0.0039327	0.00378757
						3.26	4232.23	#REF!	10.6961	10.5	0	0	2.39735	211.604	271.704	348.875	1.05802	32.1008		35.7842	1.89249	110.865	-75.0803		271.642	36.9193	74.1381	197.504		271.704	107.704	29.2921	242.412		2.02		0.00473241	0.00455778	0.00438959	0.00461102	0.00444087	0.00427699	0.00411916	0.00396716	0.00416945	0.00401559	0.0038674	0.00372469	0.00358724
						3.28	4242.23	#REF!	10.7617	10.5	0	0	2.39735	214.001	274.783	352.828	1.07	33.1708		35.9481	1.72865	113.213	-77.2653		274.453	34.1085	76.0215	198.431		274.783	104.626	30.4387	244.344		2.04		0.00448582	0.00432029	0.00416086	0.00436852	0.00420731	0.00405206	0.00390253	0.00375852	0.00394812	0.00380243	0.00366211	0.00352697	0.00339682
		2030	2080	2130		3.3	4252.23	#REF!	10.8273	10.5	0	0	2.39735	216.398	277.861	356.78	1.08199	34.2528		36.1028	1.57388	115.591	-79.4886		277.07	31.4911	77.9325	199.138		277.861	101.548	31.6098	246.251		2.06		0.00425131	0.00409443	0.00394333	0.00413803	0.00398533	0.00383827	0.00369663	0.00356021	0.00373789	0.00359996	0.00346711	0.00333917	0.00321595
	12 ft wall	4.78	5.17	5.82		3.32	4262.23	#REF!	10.8929	10.5	0	0	2.39735	218.796	280.939	360.733	1.09398	35.3468		36.249	1.42771	117.999	-81.7499		279.506	29.0551	79.8712	199.635		280.939	98.4694	32.8057	248.133		2.08		0.00402842	0.00387976	0.00373659	0.00391911	0.00377449	0.0036352	0.00350106	0.00337186	0.00353835	0.00340777	0.00328202	0.00316091	0.00304426
	Length	5702.32	5881.24	6145.79		3.34	4272.23	#REF!	10.9585	10.5	0	0	2.39735	221.193	284.017	364.685	1.10596	36.4527		36.3871	1.28966	120.436	-84.049		281.772	26.7893	81.8376	199.935		284.017	95.3912	34.0263	249.991		2.1		0.00381671	0.00367587	0.00354022	0.0037113	0.00357435	0.00344245	0.00331542	0.00319307	0.00334904	0.00322546	0.00310643	0.0029918	0.0028814
	Cost	452.816	467.024	488.031		3.36	4282.23	#REF!	11.0242	11	0	0	2.06717	223.26	286.672	368.094	1.1163	37.569		36.5174	1.1593	122.903	-86.3854		283.879	24.6826	83.8319	200.047		286.672	92.7369	35.2719	251.4		2.12		0.00361558	0.00348215	0.00335366	0.00351399	0.00338432	0.00325943	0.00313915	0.00302331	0.00316941	0.00305246	0.00293982	0.00283133	0.00272685
						3.38	4292.23	#REF!	11.0898	11	0	0	2.06717	225.327	289.326	371.502	1.12664	38.6957		36.6405	1.03622	125.399	-88.759		285.837	22.7246	85.8543	199.982		289.326	90.0826	36.5425	252.783		2.14		0.0034246	0.00329823	0.00317651	0.00332676	0.003204	0.00308576	0.00297189	0.00286222	0.00299906	0.00288839	0.00278181	0.00267915	0.00258029
						3.4	4302.23	#REF!	11.1554	11	0	0	2.06717	227.394	291.98	374.91	1.13697	39.8327		36.7567	0.920011	127.926	-91.1694		287.656	20.9053	87.9049	199.751		291.98	87.4283	37.8384	254.142		2.16		0.00324336	0.00312368	0.00300841	0.00314918	0.00303297	0.00292105	0.00281326	0.00270944	0.0028376	0.00273289	0.00263204	0.00253491	0.00244137
						3.42	4312.23	#REF!	11.221	11	0	0	2.06717	229.462	294.635	378.318	1.14731	40.98		36.8664	0.8103	130.483	-93.6165		289.346	19.2152	89.9839	199.362		294.635	84.774	39.1597	255.475		2.18		0.00307146	0.00295811	0.00284895	0.00298085	0.00287085	0.00276491	0.00266288	0.00256461	0.00268462	0.00258555	0.00249014	0.00239825	0.00230975
						3.44	4322.23	#REF!	11.2866	11	0	0	2.06717	231.529	297.289	381.726	1.15764	42.1376		36.97	0.706726	133.07	-96.0999		290.916	17.6453	92.0913	198.825		297.289	82.1197	40.5064	256.782		2.2		0.00290847	0.00280114	0.00269777	0.00282133	0.00271722	0.00261695	0.00252038	0.00242737	0.00253975	0.00244603	0.00235576	0.00226883	0.00218511
						3.46	4332.23	#REF!	11.3523	11	0	0	2.06717	233.596	299.943	385.135	1.16798	43.3056		37.0678	0.608947	135.687	-98.6195		292.374	16.1872	94.2273	198.147		299.943	79.4653	41.8788	258.064		2.22		0.00275399	0.00265236	0.00255449	0.00267024	0.0025717	0.0024768	0.0023854	0.00229738	0.0024026	0.00231394	0.00222855	0.00214631	0.00206711
						3.48	4342.23	#REF!	11.4179	11	0	0	2.06717	235.663	302.597	388.543	1.17832	44.4839		37.1601	0.516637	138.335	-101.175		293.728	14.8329	96.392	197.336		302.597	76.811	43.2769	259.321		2.24		0.00260763	0.00251141	0.00241873	0.00252716	0.00243391	0.00234409	0.00225759	0.00217428	0.0022728	0.00218893	0.00210816	0.00203036	0.00195544
						3.5	4352.23	#REF!	11.4835	11	0	0	2.06717	237.73	305.252	391.951	1.18865	45.6726		37.2472	0.42949	141.014	-103.767		294.986	13.5751	98.5857	196.401		305.252	74.1567	44.701	260.551		2.26		0.00246901	0.0023779	0.00229015	0.00239172	0.00230346	0.00221846	0.0021366	0.00205775	0.00215	0.00207066	0.00199425	0.00192066	0.00184978
						3.52	4362.23	#REF!	11.5491	11.5	0	0	1.41188	239.142	307.065	394.279	1.19571	46.8683		37.3295	0.34722	143.723	-106.394		296.155	12.4068	100.808	195.346		307.065	72.3439	46.1511	260.914		2.28		0.00233758	0.00225132	0.00216824	0.00226338	0.00217986	0.00209942	0.00202195	0.00194733	0.0020337	0.00195865	0.00188637	0.00181676	0.00174972
						3.54	4372.23	#REF!	11.6147	11.5	0	0	1.41188	240.554	308.878	396.607	1.20277	48.071		37.4072	0.269555	146.464	-109.056		297.24	11.3217	103.06	194.179		308.878	70.531	47.6274	261.25		2.3		0.00221302	0.00213136	0.00205271	0.00214182	0.00206278	0.00198666	0.00191335	0.00184274	0.0019236	0.00185262	0.00178425	0.00171841	0.001655
						3.56	4382.23	#REF!	11.6804	11.5	0	0	1.41188	241.966	310.69	398.934	1.20983	49.2809		37.4805	0.196239	149.235	-111.755		298.248	10.3138	105.341	192.906		310.69	68.7181	49.13	261.56		2.32		0.00209502	0.00201771	0.00194325	0.00202671	0.00195192	0.00187989	0.00181052	0.00174371	0.00181941	0.00175227	0.00168761	0.00162533	0.00156535
						3.58	4392.23	#REF!	11.746	11.5	0	0	1.41188	243.378	312.503	401.262	1.21689	50.4978		37.5497	0.127026	152.038	-114.488		299.184	9.37746	107.652	191.532		312.503	66.9052	50.6591	261.844		2.34		0.00198326	0.00191007	0.00183959	0.00191775	0.00184699	0.00177883	0.00171319	0.00164997	0.00172083	0.00165733	0.00159617	0.00153727	0.00148054
						3.6	4402.23	#REF!	11.8116	11.5	0	0	1.41188	244.79	314.316	403.59	1.22395	51.7217		37.615	0.0616861	154.872	-117.257		300.054	8.50753	109.992	190.062		314.316	65.0923	52.2148	262.101		2.36		0.00187744	0.00180816	0.00174143	0.00181464	0.00174768	0.00168319	0.00162107	0.00156125	0.0016276	0.00156753	0.00150969	0.00145398	0.00140032
						3.62	4412.23	#REF!	11.8772	11.5	0	0	1.41188	246.202	316.129	405.918	1.23101	52.9527		37.6767	0	157.737	-120.06		300.862	7.69916	112.362	188.5		316.129	63.2794	53.7972	262.332		2.38		0.00177727	0.00171169	0.00164852	0.00171709	0.00165372	0.0015927	0.00153393	0.00147732	0.00153943	0.00148262	0.00142791	0.00137522	0.00132447
						3.64	4422.23	#REF!	11.9428	11.5	0	0	1.41188	247.613	317.942	408.246	1.23807	54.1908							301.614	6.94788	114.762	186.852		317.942	61.4665	55.4065	262.536		2.4		0.00168247	0.00162038	0.00156059	0.00162481	0.00156485	0.0015071	0.00145149	0.00139793	0.00145607	0.00140234	0.00135059	0.00130075	0.00125275
						3.66	4432.23	#REF!	12.0085	12	0	0	1.29475	248.908	319.604	410.38	1.24454	55.4353							302.312	6.24953	117.191	185.121		319.604	59.804	57.0428	262.562		2.42		0.00159275	0.00153398	0.00147737	0.00153752	0.00148078	0.00142614	0.00137351	0.00132282	0.00137726	0.00132644	0.00127749	0.00123035	0.00118494
						3.68	4442.23	#REF!	12.0741	12	0	0	1.29475	250.203	321.267	412.515	1.25101	56.6863							302.961	5.60025	119.651	183.31		321.267	58.1415	58.7062	262.561		2.44		0.00150786	0.00145221	0.00139862	0.00145496	0.00140127	0.00134956	0.00129976	0.0012518	0.00130276	0.00125469	0.00120839	0.00116379	0.00112085
						3.7	4452.23	#REF!	12.1397	12	0	0	1.29475	251.498	322.929	414.65	1.25749	57.9438							303.565	4.99647	122.141	181.424		322.929	56.479	60.3969	262.533		2.46		0.00142754	0.00137486	0.00132412	0.00137689	0.00132608	0.00127715	0.00123002	0.00118463	0.00123235	0.00118687	0.00114307	0.00110089	0.00106027
						3.72	4462.23	#REF!	12.2053	12	0	0	1.29475	252.792	324.592	416.784	1.26396	59.2078							304.127	4.43486	124.662	179.465		324.592	54.8166	62.1151	262.477		2.48		0.00135156	0.00130168	0.00125365	0.00130308	0.00125499	0.00120868	0.00116408	0.00112112	0.0011658	0.00112278	0.00108135	0.00104144	0.00100301
						3.74	4472.23	#REF!	12.2709	12	0	0	1.29475	254.087	326.254	418.919	1.27044	60.4782							304.649	3.91236	127.213	177.437		326.254	53.1541	63.8608	262.394		2.5		0.00127969	0.00123247	0.00118699	0.00123329	0.00118778	0.00114395	0.00110174	0.00106108	0.00110292	0.00106222	0.00102302	0.00098527	0.000948911
						3.76	4482.23	#REF!	12.3366	12	0	0	1.29475	255.382	327.917	421.054	1.27691	61.7551							305.135	3.42613	129.794	175.341		327.917	51.4916	65.6342	262.283		2.52		0.00121173	0.00116701	0.00112395	0.00116732	0.00112425	0.00108276	0.00104281	0.00100432	0.0010435	0.00100499	0.000967909	0.000932191	0.000897791
						3.78	4492.23	#REF!	12.4022	12	0	0	1.29475	256.677	329.579	423.188	1.28338	63.0385							305.588	2.97353	132.407	173.181		329.579	49.8291	67.4354	262.144		2.54		0.00114745	0.0011051	0.00106432	0.00110497	0.00106419	0.00102492	0.000987098	0.000950672	0.000987364	0.000950928	0.000915837	0.000882041	0.000849492
						3.8	4502.23	#REF!	12.4678	12	0	0	1.29475	257.971	331.242	425.323	1.28986	64.3284							306.009	2.55212	135.05	170.959		331.242	48.1666	69.2646	261.977		2.56		0.00108666	0.00104656	0.00100794	0.00104602	0.00100742	0.000970247	0.000934443	0.00089996	0.000934325	0.000899847	0.000866641	0.00083466	0.000803859
						3.82	4512.23	#REF!	12.5334	12.5	0	0	1.18473	259.156	332.763	427.276	1.29578	65.6242							306.402	2.15965	137.724	168.677		332.763	46.6454	71.1219	261.641		2.58		0.00102918	0.000991198	0.000954621	0.000990303	0.000953758	0.000918563	0.000884666	0.00085202	0.000884209	0.00085158	0.000820155	0.00078989	0.000760741
						3.84	4522.23	#REF!	12.599	12.5	0	0	1.18473	260.341	334.284	429.23	1.3017	66.9259							306.767	1.79404	140.43	166.337		334.284	45.1242	73.0074	261.277		2.6		0.000974811	0.000938838	0.000904193	0.000937631	0.00090303	0.000869707	0.000837613	0.000806703	0.000836856	0.000805974	0.000776232	0.000747588	0.000720001
						3.86	4532.23	#REF!	12.6647	12.5	0	0	1.18473	261.526	335.806	431.183	1.30763	68.2335							307.108	1.45334	143.167	163.941		335.806	43.6029	74.9214	260.884		2.62		0.000923397	0.000889322	0.000856504	0.000887841	0.000855078	0.000823524	0.000793135	0.000763867	0.000792115	0.000762884	0.000734732	0.000707619	0.000681507
						3.88	4542.23	#REF!	12.7303	12.5	0	0	1.18473	262.71	337.327	433.136	1.31355	69.547							307.426	1.13578	145.936	161.49		337.327	42.0817	76.8638	260.463		2.64		0.000874777	0.000842496	0.000811406	0.000840778	0.000809751	0.00077987	0.000751091	0.000723375	0.000749841	0.00072217	0.000695521	0.000669855	0.000645136
						3.9	4552.23	#REF!	12.7959	12.5	0	0	1.18473	263.895	338.848	435.089	1.31948	70.8665							307.722	0.839697	148.736	158.986		338.848	40.5605	78.8349	260.013		2.66		0.000828799	0.000798214	0.000768759	0.00079629	0.000766906	0.000738605	0.000711349	0.000685099	0.000709899	0.000683702	0.000658472	0.000634173	0.000610771
						3.92	4562.23	#REF!	12.8615	12.5	0	0	1.18473	265.08	340.369	437.043	1.3254	72.1919							307.998	0.563559	151.568	156.43		340.369	39.0392	80.8348	259.534		2.68		0.000785318	0.000756338	0.000728428	0.000754237	0.000726405	0.000699599	0.000673782	0.000648919	0.000672158	0.000647354	0.000623466	0.000600459	0.000578301
						3.94	4572.23	#REF!	12.9271	12.5	0	0	1.18473	266.265	341.89	438.996	1.33132	73.5232							308.128	0.433764	154.432	153.696		341.89	37.518	82.8636	259.027		2.7		0.000744198	0.000716736	0.000690287	0.000714485	0.000688119	0.000662726	0.00063827	0.000614717	0.000636498	0.00061301	0.000590388	0.000568602	0.000547619
						3.96	4582.23	#REF!	12.9928	12.5	0	0	1.18473	267.449	343.412	440.949	1.33725	74.8605							308.248	0.313173	157.328	150.921		343.412	35.9968	84.9215	258.49		2.72		0.000705311	0.000679283	0.000654217	0.000676906	0.000651927	0.000627869	0.0006047	0.000582385	0.000602801	0.000580556	0.000559133	0.0005385	0.000518628
						3.98	4592.23	#REF!	13.0584	13	0	0	1.13115	268.58	344.864	442.814	1.3429	76.2034							308.36	0.201096	160.256	148.105		344.864	34.5444	87.0086	257.856		2.74		0.00066853	0.00064386	0.000620101	0.000641377	0.000617709	0.000594915	0.000572961	0.000551818	0.000570956	0.000549887	0.000529595	0.000510052	0.00049123
						4	4602.23	#REF!	13.124	13	0	0	1.13115	269.712	346.317	444.679	1.34856	77.5519							308.464	0.0969003	163.216	145.248		346.317	33.0919	89.1251	257.191		2.76		0.000633741	0.000610355	0.000587832	0.000607787	0.000585358	0.000563757	0.000542954	0.000522917	0.00054086	0.000520901	0.000501679	0.000483166	0.000465336
						4.02	4612.23	#REF!	13.1896	13	0	0	1.13115	270.843	347.769	446.544	1.35421	78.9062							308.561	0	166.209	142.352		347.769	31.6395	91.271	256.498		2.78		0.000600834	0.000578662	0.000557309	0.000576026	0.000554769	0.000534297	0.000514581	0.000495592	0.000512415	0.000493506	0.000475295	0.000457755	0.000440863
						4.04	5301.88	#REF!	13.2552	13	0	0	1.13115	271.974	349.221	448.409	1.35987	80.266												349.221	30.1871	107.187	242.034		2.8		0.000569706	0.000548683	0.000528435	0.000545993	0.000525845	0.00050644	0.000487752	0.000469753	0.000485529	0.000467612	0.000450356	0.000433737	0.000417732
						4.06	5314.08	#REF!	13.3209	13	0	0	1.13115	273.105	350.674	450.274	1.36553	81.6316												350.674	28.7347	109.732	240.942		2.82		0.000540258	0.000520322	0.000501121	0.000517593	0.000498493	0.000480098	0.000462381	0.000445319	0.000460115	0.000443136	0.000426783	0.000411034	0.000395866
						4.08	5326.19	#REF!	13.3865	13	0	0	1.13115	274.236	352.126	452.139	1.37118	83.0027												352.126	27.2822	112.309	239.817		2.84		0.000512398	0.00049349	0.000475279	0.000490735	0.000472626	0.000455185	0.000438388	0.000422211	0.00043609	0.000419997	0.000404498	0.000389572	0.000375196
						4.1	5338.21	#REF!	13.4521	13	0	0	1.13115	275.367	353.579	454.004	1.37684	84.3796												353.579	25.8298	114.92	238.659		2.86		0.000486039	0.000468103	0.000450829	0.000465333	0.000448162	0.000431624	0.000415696	0.000400356	0.000413376	0.000398121	0.00038343	0.000369281	0.000355653
						4.12	5350.13	#REF!	13.5177	13.5	0	0	0.724942	276.092	354.51	455.199	1.38046	85.76												354.51	24.899	117.564	236.946		2.88		0.000461086	0.000444071	0.000427684	0.000441296	0.000425012	0.000409328	0.000394223	0.000379675	0.00039189	0.000377429	0.000363501	0.000350087	0.000337168
						4.14	5361.98	#REF!	13.5833	13.5	0	0	0.724942	276.817	355.44	456.394	1.38409	87.1441												355.44	23.9681	120.241	235.2		2.9		0.000437463	0.00042132	0.000405773	0.000418549	0.000403104	0.000388229	0.000373902	0.000360105	0.000371566	0.000357855	0.000344649	0.000331931	0.000319682
						4.16	5373.73	#REF!	13.649	13.5	0	0	0.724942	277.542	356.371	457.59	1.38771	88.5318												356.371	23.0373	122.951	233.42		2.92		0.000415099	0.000399781	0.000385029	0.000397022	0.000382371	0.000368261	0.000354671	0.000341583	0.000352339	0.000339337	0.000326815	0.000314755	0.00030314
						4.18	5385.4	#REF!	13.7146	13.5	0	0	0.724942	278.267	357.302	458.785	1.39134	89.9232												357.302	22.1064	125.695	231.607		2.94		0.000393925	0.000379388	0.000365388	0.000376648	0.000362749	0.000349363	0.000336471	0.000324054	0.000334148	0.000321818	0.000309942	0.000298505	0.000287489
						4.2	5396.99	#REF!	13.7802	13.5	0	0	0.724942	278.992	358.233	459.98	1.39496	91.3181												358.233	21.1756	128.472	229.761		2.96		0.000373876	0.00036008	0.000346792	0.000357364	0.000344176	0.000331476	0.000319244	0.000307463	0.000316937	0.000305242	0.000293978	0.00028313	0.000272682
						4.22	5408.49	#REF!	13.8458	13.5	0	0	0.724942	279.717	359.164	461.175	1.39859	92.7167												359.164	20.2448	131.282	227.881		2.98		0.000354892	0.000341796	0.000329183	0.00033911	0.000326596	0.000314544	0.000302937	0.000291758	0.000300652	0.000289557	0.000278872	0.000268581	0.00025867
						4.24	5419.92	#REF!	13.9114	13.5	0	0	0.724942	280.442	360.095	462.371	1.40221	94.1189												360.095	19.3139	134.127	225.968		3		0.000336914	0.000324482	0.000312508	0.00032183	0.000309954	0.000298516	0.0002875	0.000276891	0.000285241	0.000274715	0.000264578	0.000254814	0.000245411
						4.26	5431.27	#REF!	13.9771	13.5	0	0	0.724942	281.167	361.025	463.566	1.40583	95.5248												361.025	18.3831	137.005	224.021		3.02		0.000319888	0.000308084	0.000296715	0.000305471	0.000294199	0.000283342	0.000272886	0.000262816	0.000270657	0.000260669	0.00025105	0.000241785	0.000232863
						4.28	5442.54	#REF!	14.0427	14	0	0	1.12282	282.29	362.467	465.417	1.41145	96.9362												362.467	16.9413	139.917	222.551		3.04		0.000303768	0.000292559	0.000281763	0.000289988	0.000279287	0.000268981	0.000259055	0.000249495	0.000256858	0.000247379	0.000238251	0.000229459	0.000220991
						4.3	5453.73	#REF!	14.1083	14	0	0	1.12282	283.413	363.909	467.268	1.41706	98.3533												363.909	15.4996	142.862	221.047		3.06		0.000288504	0.000277858	0.000267605	0.000275332	0.000265172	0.000255387	0.000245962	0.000236886	0.000243801	0.000234804	0.00022614	0.000217795	0.000209758
						4.32	5464.85	#REF!	14.1739	14	0	0	1.12282	284.535	365.351	469.119	1.42268	99.7759												365.351	14.0579	145.842	219.509		3.08		0.000274049	0.000263936	0.000254197	0.000261458	0.000251809	0.000242517	0.000233568	0.000224949	0.000231444	0.000222904	0.000214678	0.000206756	0.000199126
						4.34	5475.89	#REF!	14.2395	14	0	0	1.12282	285.658	366.792	470.971	1.42829	101.204												366.792	12.6162	148.855	217.937		3.1		0.000260358	0.000250751	0.000241497	0.000248321	0.000239157	0.000230332	0.000221832	0.000213646	0.000219749	0.00021164	0.00020383	0.000196308	0.000189064
						4.36	5486.86	#REF!	14.3052	14	0	0	1.12282	286.781	368.234	472.822	1.4339	102.638												368.234	11.1744	151.903	216.331		3.12		0.000247389	0.00023826	0.000229468	0.000235881	0.000227177	0.000218793	0.00021072	0.000202944	0.000208678	0.000200977	0.000193561	0.000186418	0.000179539
						4.38	5497.77	#REF!	14.3708	14	0	0	1.12282	287.904	369.676	474.673	1.43952	104.078												369.676	9.73271	154.984	214.691		3.14		0.000235103	0.000226427	0.000218071	0.0002241	0.00021583	0.000207865	0.000200195	0.000192807	0.000198196	0.000190882	0.000183838	0.000177054	0.000170521
						4.4	5508.6	#REF!	14.4364	14	0	0	1.12282	289.027	371.118	476.524	1.44513	105.523												371.118	8.29098	158.1	213.017		3.16		0.000223461	0.000215215	0.000207273	0.00021294	0.000205082	0.000197514	0.000190226	0.000183206	0.000188271	0.000181323	0.000174632	0.000168188	0.000161981
						4.42	5519.36	#REF!	14.502	14.5	0	0	1.07617	290.103	372.499	478.299	1.45051	106.973												372.499	6.90915	161.251	211.249		3.18		0.000212428	0.000204589	0.000197039	0.000202368	0.0001949	0.000187708	0.000180781	0.00017411	0.000178871	0.00017227	0.000165913	0.000159791	0.000153894
						4.44	5530.05	#REF!	14.5676	14.5	0	0	1.07617	291.179	373.881	480.073	1.45589	108.429												373.881	5.52732	164.435	209.446		3.2		0.000201971	0.000194517	0.000187339	0.000192351	0.000185253	0.000178416	0.000171832	0.000165492	0.000169967	0.000163695	0.000157655	0.000151837	0.000146234
						4.46	5540.68	#REF!	14.6333	14.5	0	0	1.07617	292.255	375.263	481.847	1.46128	109.89												375.263	4.14549	167.654	207.609		3.22		0.000192058	0.00018497	0.000178145	0.000182858	0.00017611	0.000169611	0.000163352	0.000157324	0.000161533	0.000155572	0.000149831	0.000144302	0.000138977
						4.48	5551.24	#REF!	14.6989	14.5	0	0	1.07617	293.331	376.645	483.622	1.46666	111.357												376.645	2.76366	170.908	205.737		3.24		0.000182659	0.000175919	0.000169427	0.000173861	0.000167445	0.000161266	0.000155315	0.000149583	0.000153541	0.000147875	0.000142418	0.000137163	0.000132101
						4.5	5561.73	#REF!	14.7645	14.5	0	0	1.07617	294.407	378.027	485.396	1.47204	112.829												378.027	1.38183	174.196	203.831		3.26		0.000173748	0.000167336	0.000161161	0.000165332	0.000159231	0.000153355	0.000147696	0.000142246	0.000145968	0.000140581	0.000135394	0.000130397	0.000125585
						4.52	5572.16	#REF!	14.8301	14.5	0	0	1.07617	295.484	379.409	487.17	1.47742	114.307												379.409	0	177.518	201.89		3.28		0.000165297	0.000159197	0.000153322	0.000157246	0.000151444	0.000145855	0.000140473	0.000135289	0.00013879	0.000133669	0.000128736	0.000123986	0.00011941
						4.54	5582.53	#REF!	14.8957	14.5	0	0	0	295.484	379.409	487.17	1.47742	115.784												379.409	0	180.876	198.533		3.3		0.000157273	0.00015147	0.00014588	0.000149573	0.000144053	0.000138737	0.000133618	0.000128687	0.000131981	0.00012711	0.00012242	0.000117902	0.000113551
						4.56	5592.83	#REF!	14.9614	14.5	0	0	0	295.484	379.409	487.17	1.47742	117.261												379.409	0	184.268	195.14		3.32		0.000149656	0.000144134	0.000138815	0.00014229	0.000137039	0.000131982	0.000127112	0.000122421	0.00012552	0.000120888	0.000116427	0.00011213	0.000107993
						4.58	5603.08	#REF!	15.027	15	0	0	0	295.484	379.409	487.17	1.47742	118.739												379.409	0	187.695	191.713		3.34		0.000142424	0.000137168	0.000132106	0.000135377	0.000130381	0.00012557	0.000120936	0.000116473	0.000119389	0.000114983	0.00011074	0.000106654	0.000102718
						4.6	5613.26	#REF!	15.0926	15	0	0	0	295.484	379.409	487.17	1.47742	120.216												379.409	0	191.157	188.251		3.36		0.000135556	0.000130554	0.000125736	0.000128814	0.000124061	0.000119483	0.000115074	0.000110827	0.000113571	0.00010938	0.000105344	0.000101456	9.77122e-05
						4.62	5623.38	#REF!	15.1582	15	0	0	0	295.484	379.409	487.17	1.47742	121.694												379.409	0	194.654	184.754		3.38		0.000129035	0.000124273	0.000119687	0.000122584	0.000118061	0.000113704	0.000109508	0.000105467	0.000108049	0.000104062	0.000100222	9.65235e-05	9.29616e-05
						4.64	5633.45	#REF!	15.2238	15	0	0	0	295.484	379.409	487.17	1.47742	123.171												379.409	0	198.186	181.222		3.4		0.000122841	0.000118308	0.000113942	0.00011667	0.000112364	0.000108218	0.000104225	0.000100378	0.000102808	9.90147e-05	9.53608e-05	9.18418e-05	8.84527e-05
						4.66	5643.45	#REF!	15.2895	15	0	0	0	295.484	379.409	487.17	1.47742	124.649												379.409	0	201.753	177.655		3.42		0.000116958	0.000112642	0.000108486	0.000111054	0.000106956	0.000103009	9.92075e-05	9.55466e-05	9.78339e-05	9.42236e-05	9.07466e-05	8.73979e-05	8.41727e-05
						4.68	5653.4	#REF!	15.3551	15	0	0	0	295.484	379.409	487.17	1.47742	126.126												379.409	0	205.356	174.053		3.44		0.000111371	0.000107261	0.000103303	0.000105721	0.000101819	9.80621e-05	9.44434e-05	9.09583e-05	9.31114e-05	8.96754e-05	8.63662e-05	8.31791e-05	8.01097e-05
						4.7	5663.3	#REF!	15.4207	15	0	0	0	295.484	379.409	487.17	1.47742	127.603												379.409	0	208.993	170.415		3.46
						4.72	5673.13	#REF!	15.4863	15	0	0	0	295.484	379.409	487.17	1.47742	129.081												379.409	0	212.666	166.742		3.48
						4.74	5682.92	#REF!	15.5519	15.5	0	0	0	295.484	379.409	487.17	1.47742	130.558												379.409	0	216.375	163.034		3.5
						4.76	5692.64	#REF!	15.6176	15.5	0	0	0	295.484	379.409	487.17	1.47742	132.036												379.409	0	220.119	159.29		3.52
						4.78	5702.32	#REF!	15.6832	15.5	0	0	0	295.484	379.409	487.17	1.47742	133.513												379.409	0	223.898	155.511		3.54
						4.8	5711.94	#REF!	15.7488	15.5	0	0	0	295.484	379.409	487.17	1.47742	134.99												379.409	0	227.713	151.696		3.56
						4.82	5721.51	#REF!	15.8144	15.5	0	0	0	295.484	379.409	487.17	1.47742	136.468																	3.58
						4.84	5731.03	#REF!	15.88	15.5	0	0	0	295.484	379.409	487.17	1.47742	137.945																	3.6
						4.86	5740.5	#REF!	15.9457	15.5	0	0	0	295.484	379.409	487.17	1.47742	139.423																	3.62
						4.88	5749.92	#REF!	16.0113	16	0	0	0	295.484	379.409	487.17	1.47742	140.9																	3.64
						4.9	5759.29	#REF!	16.0769	16	0	0	0	295.484	379.409	487.17	1.47742	142.378																	3.66
						4.92	5768.61	#REF!	16.1425	16	0	0	0	295.484	379.409	487.17	1.47742	143.855																	3.68
						4.94	5777.88	#REF!	16.2081	16	0	0	0	295.484	379.409	487.17	1.47742	145.332																	3.7
						4.96	5787.1	#REF!	16.2738	16	0	0	0	295.484	379.409	487.17	1.47742	146.81																	3.72
							0
							0
							0
							0
							0
							0
							0
							0
							0
							0
							0
							0
							0
							0
							0
							0
							0
							0
							0
							0
							0
							0
							0
							0
[truncated: 138 more columns]

## Sheet: Bridgeport_3
																																					0.0483585	0.0534118	0.0514408	0.0542452	0.0522435	0.0503156	0.0484589	0.0466706	0.049245	0.0474278	0.0456776	0.043992	0.0423687
																																					0	1	2	3	4	5	6	7	8	9	10	11	12
	INPUTS			ERROR CHECK		Surge height (m)	Wall Length (m)	sum of middleH * dL	Surge height (ft)	Rounding (ft)	delta Area (sq m)	Building numbers	Building Values (million $)	Cum Value	2080	2130	Marginal Damage	Damage	2030	Expected Benefit (million $, PV)	Residual Dam (million $, PV)	Cost (Million $)	Net Benefit (million $, PV)	2080	Expected Benefit (million $, PV)	Residual Dam (million $, PV)	Cost (Million $)	Net Benefit (million $, PV)	2130	Expected Benefit (million $, PV)	Residual Dam (million $, PV)	Cost (million $)	Net Benefit (million $, PV)		Surge height (m)		0	1	2	3	4	5	6	7	8	9	10	11	12
	SPATIAL DATA					1.8	342.704	#REF!	5.9058	5.5	0	0	0	0	0	0	0	0		0	1.82933	0.906426	-0.906426		0	45.3883	0.01	-0.01		0	0	0.01	-0.01		1.8		0	0	0	0	0	0	0	0	0	0	0	0	0
	Target City	Bridgeport				1.82	375.612	#REF!	5.97142	5.5	0	0	0	0	0	0	0	0		0	1.82933	1.05276	-1.05276		0	45.3883	0.01	-0.01		0	0	0.01	-0.01		1.82		0	0	0	0	0	0	0	0	0	0	0	0	0
	Policy Year (base year: 2020)	#REF!				1.84	408.688	#REF!	6.03704	6	0	0	0	0	0	0	0	0		0	1.82933	1.21186	-1.21186		0	45.3883	0.01	-0.01		0	0	0.01	-0.01		1.84		0	0	0	0	0	0	0	0	0	0	0	0	0
	SLR rate (before policy)	3.14	mm/year			1.86	441.926	#REF!	6.10266	6	0	0	0	0	0	0	0	0		0	1.82933	1.38423	-1.38423		0	45.3883	0.309658	-0.309658		0	0	0.01	-0.01		1.86		0	0	0	0	0	0	0	0	0	0	0	0	0
	SLR rate (after policy)	#REF!	mm/year			1.88	475.322	#REF!	6.16828	6	0	0	0	0	0	0	0	0		0	1.82933	1.5704	-1.5704		0	45.3883	0.37221	-0.37221		0	0	0.01	-0.01		1.88		0	0	0	0	0	0	0	0	0	0	0	0	0
	MHHW	1.06	meter			1.9	508.87	#REF!	6.2339	6	0	0	0	0	0	0	0	0		0	1.82933	1.77089	-1.77089		0	45.3883	0.442723	-0.442723		0	0	0.01	-0.01		1.9		0	0	0	0	0	0	0	0	0	0	0	0	0
						1.92	542.564	#REF!	6.29952	6	0	0	0	0	0	0	0	0		0	1.82933	1.98622	-1.98622		0	45.3883	0.521692	-0.521692		0	0	0.01	-0.01		1.92		0	0	0	0	0	0	0	0	0	0	0	0	0
						1.94	576.397	#REF!	6.36514	6	0	0	0	0	0	0	0	0		0	1.82933	2.2169	-2.2169		0	45.3883	0.609613	-0.609613		0	0	0.01	-0.01		1.94		0	0	0	0	0	0	0	0	0	0	0	0	0
	GEV ESTIMATION					1.96	610.362	#REF!	6.43076	6	0	0	0	0	0	0	0	0		0	1.82933	2.46344	-2.46344		0	45.3883	0.706983	-0.706983		0	0	0.01	-0.01		1.96		0	0	0	0	0	0	0	0	0	0	0	0	0
	μ (location)	1.845				1.98	644.454	#REF!	6.49638	6	0	0	0	0	0	0	0	0		0	1.82933	2.72637	-2.72637		0	45.3883	0.814298	-0.814298		0	0	0.01	-0.01		1.98		0	0	0	0	0	0	0	0	0	0	0	0	0
	σ (scale)	0.1544				2	678.664	#REF!	6.562	6.5	0	0	0	0	0	0	0	0		0	1.82933	3.00619	-3.00619		0	45.3883	0.932058	-0.932058		0	0	0.01	-0.01		2		0	0	0	0	0	0	0	0	0	0	0	0	0
	k (shape)	0.0752				2.02	712.986	#REF!	6.62762	6.5	0	0	0	0	0	0	0	0		0	1.82933	3.3034	-3.3034		0	45.3883	1.06076	-1.06076		0	0	0.01	-0.01		2.02		0	0	0	0	0	0	0	0	0	0	0	0	0
						2.04	747.411	#REF!	6.69324	6.5	0	0	0	0	0	0	0	0		0	1.82933	3.61852	-3.61852		0	45.3883	1.2009	-1.2009		0	0	0.01	-0.01		2.04		0	0	0	0	0	0	0	0	0	0	0	0	0
	Coefficients of the cost function					2.06	781.931	#REF!	6.75886	6.5	0	0	0	0	0	0	0	0		0	1.82933	3.95203	-3.95203		0	45.3883	1.35298	-1.35298		0	0	0.0447265	-0.0447265		2.06		0	0	0	0	0	0	0	0	0	0	0	0	0
	coef1	1.5846				2.08	816.539	#REF!	6.82448	6.5	0	0	0	0	0	0	0	0		0	1.82933	4.30443	-4.30443		0	45.3883	1.51748	-1.51748		0	0	0.0298919	-0.0298919		2.08		0	0	0	0	0	0	0	0	0	0	0	0	0
	coef2	0.000650184				2.1	851.225	#REF!	6.8901	6.5	0	0	0	0	0	0	0	0		0	1.82933	4.6762	-4.6762		0	45.3883	1.6949	-1.6949		0	0	0.0175284	-0.0175284		2.1		0	0	0	0	0	0	0	0	0	0	0	0	0
	coef3	-7.03899e-08				2.12	885.982	#REF!	6.95572	6.5	0	0	0	0	0	0	0	0		0	1.82933	5.06782	-5.06782		0	45.3883	1.88574	-1.88574		0	0	0.00810851	-0.00810851		2.12		0	0	0	0	0	0	0	0	0	0	0	0	0
	coef4	2.09933e-11				2.14	920.801	#REF!	7.02134	7	0	0	0	0	0	0	0	0		0	1.82933	5.47977	-5.47977		0	45.3883	2.09046	-2.09046		0	0	0.00210679	-0.00210679		2.14		0	0	0	0	0	0	0	0	0	0	0	0	0
	q	2.72236e+07				2.16	955.671	#REF!	7.08696	7	0	0	0	0	0	0	0	0		0	1.82933	5.9125	-5.9125		0	45.3883	2.30957	-2.30957		0	0	0	0		2.16		0	0	0	0	0	0	0	0	0	0	0	0	0
	Growth Rate	0.005	%/year			2.18	990.585	#REF!	7.15258	7	0	0	0	0	0	0	0	0		0	1.82933	6.36648	-6.36648		0	45.3883	2.54353	-2.54353		0	0	0.00226646	-0.00226646		2.18		0	0	0	0	0	0	0	0	0	0	0	0	0
	discount rate	0.0426	%/year			2.2	1025.53	#REF!	7.2182	7	0	0	0	0	0	0	0	0		0	1.82933	6.84216	-6.84216		0	45.3883	2.79283	-2.79283		0	0	0.00938568	-0.00938568		2.2		0	0	0	0	0	0	0	0	0	0	0	0	0
	useful_life	30	years			2.22	1060.51	#REF!	7.28382	7	0	0	0	0	0	0	0	0		0	1.82933	7.33998	-7.33998		0	45.3883	3.05792	-3.05792		0	0	0.021838	-0.021838		2.22		0	0	0	0	0	0	0	0	0	0	0	0	0
	CapEx	0.005				2.24	1095.5	#REF!	7.34944	7	0	0	0	0	0	0	0	0		0	1.82933	7.86036	-7.86036		0	45.3883	3.33927	-3.33927		0	0	0.0401039	-0.0401039		2.24		0	0	0	0	0	0	0	0	0	0	0	0	0
	Difference	0.02	meter			2.26	1130.49	#REF!	7.41506	7	0	0	0	0	0	0	0	0		0	1.82933	8.40373	-8.40373		0	45.3883	3.63735	-3.63735		0	0	0.064664	-0.064664		2.26		0	0	0	0	0	0	0	0	0	0	0	0	0
	Minimum height where buildings locate	8	ft			2.28	1165.48	#REF!	7.48068	7	0	0	0	0	0	0	0	0		0	1.82933	8.97051	-8.97051		0	45.3883	3.9526	-3.9526		0	0	0.0959983	-0.0959983		2.28		0	0	0	0	0	0	0	0	0	0	0	0	0
	A factor to account for other damages than buildings	2				2.3	1200.46	#REF!	7.5463	7.5	0	0	0	0	0	0	0	0		0	1.82933	9.56108	-9.56108		0	45.3883	4.28546	-4.28546		0	0	0.134586	-0.134586		2.3		0	0	0	0	0	0	0	0	0	0	0	0	0
	Ratio of houses w/ basements	1	(1=All have basements; 0=No basements)			2.32	1235.41	#REF!	7.61192	7.5	0	0	0	0	0	0	0	0		0	1.82933	10.1759	-10.1759		0	45.3883	4.63638	-4.63638		0	0	0.180904	-0.180904		2.32		0	0	0	0	0	0	0	0	0	0	0	0	0
	Average height of the first floor	0.9	meter			2.34	1270.34	#REF!	7.67754	7.5	0	0	0	0	0	0	0	0		0	1.82933	10.8152	-10.8152		0	45.3883	5.00578	-5.00578		0	0	0.235429	-0.235429		2.34		0	0	0	0	0	0	0	0	0	0	0	0	0
	Coastal length 12ft	2233.74				2.36	1305.22	#REF!	7.74316	7.5	0	0	0	0	0	0	0	0		0	1.82933	11.4795	-11.4795		0	45.3883	5.39409	-5.39409		0	0	0.298635	-0.298635		2.36		0	0	0	0	0	0	0	0	0	0	0	0	0
	OUTPUTS	2030	20800	2130		2.38	1340.05	#REF!	7.80878	7.5	0	0	0	0	0	0	0	0		0	1.82933	12.1691	-12.1691		0	45.3883	5.80172	-5.80172		0	0	0.370991	-0.370991		2.38		0	0	0	0	0	0	0	0	0	0	0	0	0
	Optimal Level of Flood Defense	No_Wall	3.06	4.02		2.4	1374.83	#REF!	7.8744	7.5	0	0	0	0	0	0	0	0		0	1.82933	12.8844	-12.8844		0	45.3883	6.22909	-6.22909		0	0	0.452968	-0.452968		2.4		0	0	0	0	0	0	0	0	0	0	0	0	0
	Maximum height of Walls					2.42	1409.53	#REF!	7.94002	7.5	0	0	0	0	0	0	0	0		0	1.82933	13.6257	-13.6257		0	45.3883	6.67659	-6.67659		0	0	0.545028	-0.545028		1.2		0	0	0	0	0	0	0	0	0	0	0	0	0
	Average height of Walls	#VALUE!	1.55	1.86		2.44	1444.16	#REF!	8.00564	8	0	0	0.644621	0.644621	0.827709	1.0628	0.0032231	0.0032231		0.000942135	1.82839	14.3933	-14.3924		0.0391959	45.3491	7.14461	-7.10542		0	0	0.647633	-0.647633		1.22		2.34833e-05	2.26167e-05	2.17821e-05	2.33385e-05	2.24773e-05	2.16478e-05	2.0849e-05	2.00796e-05	2.15125e-05	2.07187e-05	1.99541e-05	1.92177e-05	1.85086e-05
	Average Elevation of wall	1.12	1.51	2.16		2.46	1478.71	#REF!	8.07126	8	0	0	0.644621	1.28924	1.65542	2.1256	0.00644621	0.00966931		0.00349581	1.82584	15.1876	-15.1841		0.147096	45.2412	7.63354	-7.48644		0	151.646	0.761239	-0.761239		1.24		6.33265e-05	6.09896e-05	5.8739e-05	6.2935e-05	6.06126e-05	5.83759e-05	5.62217e-05	5.4147e-05	5.80159e-05	5.5875e-05	5.38131e-05	5.18273e-05	4.99148e-05
	Wall Length	No_Wall	1923.74	2403.74		2.48	1513.16	#REF!	8.13688	8	0	0	0.644621	1.93386	2.48313	3.1884	0.00966931	0.0193386		0.00810634	1.82122	16.0088	-16.0007		0.346264	45.042	8.14375	-7.79749		0	151.646	0.8863	-0.8863		1.26		0.000113859	0.000109657	0.00010561	0.000113143	0.000108968	0.000104946	0.000101074	9.7344e-05	0.000104298	0.000100449	9.67422e-05	9.31722e-05	8.9734e-05
	Cost of Wall	No_Wall	26.4367	47.5675		2.5	1547.51	#REF!	8.2025	8	0	0	0.644621	2.57848	3.31084	4.2512	0.0128924	0.032231		0.0150365	1.81429	16.8573	-16.8423		0.654274	44.734	8.67561	-8.02133		0	151.646	1.02326	-1.02326		1.28		0.000170626	0.000164329	0.000158265	0.000169522	0.000163266	0.000157241	0.000151439	0.000145851	0.000156253	0.000150487	0.000144934	0.000139585	0.000134434
	Expected Benefit	No_Wall	31.4261	116.623		2.52	1581.75	#REF!	8.26812	8	0	0	0.644621	3.2231	4.13855	5.314	0.0161155	0.0483466		0.0244046	1.80493	17.7333	-17.7089		1.13162	44.2567	9.22947	-8.09786		0	151.646	1.17257	-1.17257		1.3		0.000230183	0.000221688	0.000213508	0.000228637	0.0002202	0.000212074	0.000204248	0.000196711	0.000210703	0.000202927	0.000195439	0.000188227	0.000181281
	Net Benefit	#VALUE!	4.98947	69.0558		2.54	1615.87	#REF!	8.33374	8	0	0	0.644621	3.86772	4.96626	6.3768	0.0193386	0.0676852		0.0362176	1.79311	18.6372	-18.601		1.74742	43.6409	9.80569	-8.05827		0	151.646	1.33466	-1.33466		1.32		0.000289915	0.000279216	0.000268913	0.00028788	0.000277257	0.000267026	0.000257172	0.000247682	0.000265233	0.000255445	0.000246019	0.00023694	0.000228197
	Residual Damage	1.82933	13.9621	35.0229		2.56	1649.87	#REF!	8.39936	8	0	0	0.644621	4.51234	5.79397	7.4396	0.0225617	0.0902469		0.0503985	1.77893	19.5691	-19.5188		2.50804	42.8802	10.4046	-7.89657		0	151.646	1.50997	-1.50997		1.34		0.000347882	0.000335045	0.000322681	0.000345319	0.000332576	0.000320304	0.000308484	0.0002971	0.000318056	0.000306319	0.000295015	0.000284129	0.000273644
	Expected Damage	1.82933	45.3883	151.646		2.58	1683.74	#REF!	8.46498	8	0	0	0.644621	5.15697	6.62167	8.5024	0.0257848	0.116032		0.0668096	1.76252	20.5295	-20.4627		3.41838	41.9699	11.0265	-7.60816		0	151.646	1.69891	-1.69891		1.36		0.000402691	0.000387831	0.000373519	0.000399566	0.000384821	0.000370621	0.000356944	0.000343772	0.00036789	0.000354314	0.000341239	0.000328647	0.000316519
						2.6	1693.74	#REF!	8.5306	8.5	0	0	1.72962	6.88659	8.84255	11.3541	0.0344329	0.150465		0.0859625	1.74337	21.2211	-21.1351		4.3975	40.9908	11.5106	-7.11307		1.1344	150.512	1.87564	-0.741236		1.38		0.00047034	0.000452984	0.000436268	0.000466489	0.000449275	0.000432696	0.000416728	0.00040135	0.000429338	0.000413494	0.000398235	0.00038354	0.000369387
	Surge height (ft)	Area submerged (sq m)	delta Area (sq m)	Building numbers	Building Values (million $)	2.62	1703.74	#REF!	8.59622	8.5	0	0	1.72962	8.61621	11.0634	14.2057	0.043081	0.193546		0.0914463	1.73788	21.9272	-21.8357		4.67784	40.7104	12.0073	-7.32949		1.4592	150.187	2.06213	-0.602926		1.38		0.000605008	0.000582682	0.00056118	0.000600054	0.000577911	0.000556585	0.000536046	0.000516265	0.000552266	0.000531886	0.000512258	0.000493355	0.000475149
	3	1309.3	0	0	0	2.64	1713.74	#REF!	8.66184	8.5	0	0	1.72962	10.3458	13.2843	17.0574	0.0517292	0.245275		0.119544	1.70979	22.648	-22.5284		6.00454	39.3837	12.517	-6.51242		4.55906	147.087	2.25852	2.30054		1.4		0.000690897	0.000665402	0.000640847	0.000684924	0.000659649	0.000635306	0.000611862	0.000589284	0.000630104	0.000606852	0.000584458	0.000562891	0.000542119
0.9144	3.5	4578.8	3269.5		0	2.66	1723.74	#REF!	8.72746	8.5	0	0	1.72962	12.0755	15.5052	19.9091	0.0603773	0.305652		0.151058	1.67827	23.3835	-23.2325		7.38225	38.006	13.0396	-5.65735		9.62584	142.02	2.46495	7.16089		1.42		0.000776215	0.000747571	0.000719984	0.000769129	0.000740747	0.000713412	0.000687086	0.000661731	0.000707244	0.000681145	0.00065601	0.000631802	0.000608487
1.0668	4	5888.1	1309.3		0	2.68	1733.74	#REF!	8.79308	8.5	0	0	1.72962	13.8051	17.7261	22.7607	0.0690254	0.374677		0.185832	1.6435	24.134	-23.9482		8.79345	36.5948	13.5754	-4.78195		16.9601	134.686	2.68156	14.2785		1.44		0.000858277	0.000826605	0.000796102	0.00085001	0.000818643	0.000788433	0.000759339	0.000731318	0.000781236	0.000752407	0.000724642	0.000697901	0.000672147
1.2192	4.5	7848.3	1960.2		0	2.7	1743.74	#REF!	8.8587	8.5	0	0	1.72962	15.5347	19.9469	25.6124	0.0776735	0.452351		0.223632	1.6057	24.8996	-24.676		10.2214	35.1669	14.1245	-3.90313		19.9469	131.699	2.90848	17.0385		1.46		0.000935168	0.000900658	0.000867422	0.000925672	0.000891513	0.000858614	0.00082693	0.000796414	0.000850344	0.000818964	0.000788743	0.000759637	0.000731605
1.3716	5	9812.2	1963.9		0	2.72	1753.74	#REF!	8.92432	8.5	0	0	1.72962	17.2643	22.1678	28.464	0.0863216	0.538673		0.264171	1.56516	25.6804	-25.4162		11.6512	33.7371	14.687	-3.03582		22.1678	129.478	3.14585	19.022		1.48		0.00100558	0.000968476	0.000932737	0.000994834	0.000958122	0.000922766	0.000888714	0.000855919	0.000913396	0.00087969	0.000847228	0.000815963	0.000785853
1.524	5.5	10466.9	654.7		0	2.74	1763.74	#REF!	8.98994	8.5	0	0	1.72962	18.9939	24.3887	31.3157	0.0949697	0.633642		0.307131	1.5222	26.4766	-26.1694		13.0704	32.3178	15.2631	-2.19262		24.3887	127.257	3.39381	20.9949		1.5		0.0010687	0.00102927	0.000991285	0.00105669	0.0010177	0.000980145	0.000943975	0.000909141	0.000969666	0.000933884	0.000899422	0.000866231	0.000834266
1.6764	6	13081.8	2614.9		0	2.76	1773.74	#REF!	9.05556	9	0	0	2.07986	21.0738	27.0593	34.7448	0.105369	0.739011		0.352288	1.47704	27.2882	-26.9359		14.4725	30.9158	15.8528	-1.38036		27.0593	124.587	3.65249	23.4068		1.52		0.00112675	0.00108518	0.00104513	0.00111346	0.00107237	0.0010328	0.00099469	0.000957984	0.00102119	0.000983511	0.000947217	0.000912263	0.000878599
1.8288	6.5	16332.6	3250.8		0	2.78	1783.74	#REF!	9.12118	9	0	0	2.07986	23.1537	29.7299	38.1739	0.115768	0.85478		0.39938	1.42995	28.1154	-27.716		15.8516	29.5367	16.4564	-0.604844		29.7299	121.916	3.92204	25.8078		1.54		0.00117882	0.00113531	0.00109342	0.00116424	0.00112128	0.0010799	0.00104005	0.00100167	0.00106717	0.00102778	0.000989858	0.00095333	0.00091815
1.9812	7	25185.2	8852.6		0	2.8	1793.74	#REF!	9.1868	9	0	0	2.07986	25.2335	32.4005	41.603	0.126168	0.980947		0.448128	1.3812	28.9584	-28.5103		17.2032	28.1851	17.074	0.129194		32.4005	119.246	4.20258	28.1979		1.56		0.00122434	0.00117916	0.00113564	0.00120851	0.00116391	0.00112096	0.00107959	0.00103975	0.0011071	0.00106625	0.0010269	0.000989008	0.000952512
2.1336	7.5	40827	15641.8		0	2.82	1803.74	#REF!	9.25242	9	0	0	2.07986	27.3134	35.0711	45.0321	0.136567	1.11751		0.498246	1.33108	29.8173	-29.3191		18.5238	26.8645	17.7057	0.818092		35.0711	116.575	4.49427	30.5768		1.58		0.00126307	0.00121646	0.00117157	0.00124601	0.00120003	0.00115574	0.00111309	0.00107202	0.0011408	0.0010987	0.00105816	0.00101911	0.000981501
2.286	8	55938.5	15111.5	27.2244	5.15697	2.84	1813.74	#REF!	9.31804	9	0	0	2.07986	29.3932	37.7417	48.4613	0.146966	1.26448		0.549449	1.27988	30.6923	-30.1428		19.8111	25.5772	18.3517	1.45945		37.7417	113.905	4.79722	32.9444		1.6		0.00129496	0.00124717	0.00120115	0.00127672	0.00122961	0.00118423	0.00114053	0.00109845	0.00116824	0.00112513	0.00108361	0.00104362	0.00100511
2.4384	8.5	96485.1	40546.6	73.0475	13.837	2.86	1823.74	#REF!	9.38366	9	0	0	2.07986	31.4731	40.4123	51.8904	0.157365	1.42185		0.601461	1.22787	31.5834	-30.9819		21.0637	24.3246	19.012	2.05169		40.4123	111.234	5.11159	35.3007		1.62		0.00132015	0.00127144	0.00122452	0.00130079	0.00125279	0.00120656	0.00116204	0.00111916	0.00118957	0.00114567	0.00110339	0.00106268	0.00102346
2.5908	9	139148	42662.4	76.8593	14.559	2.88	1833.74	#REF!	9.44928	9	0	0	2.07986	33.553	43.0828	55.3195	0.167765	1.58961		0.654019	1.17531	32.4908	-31.8367		22.281	23.1073	19.6868	2.59414		43.0828	108.563	5.4375	37.6453		1.64		0.00133889	0.00128948	0.0012419	0.00131848	0.00126983	0.00122297	0.00117784	0.00113437	0.00120503	0.00116057	0.00111774	0.00107649	0.00103677
2.7432	9.5	160828	21680	39.058	7.39854	2.9	1843.74	#REF!	9.5149	9.5	0	0	0.924817	34.4778	44.2703	56.8442	0.172389	1.762		0.706705	1.12263	33.4146	-32.7079		23.4591	21.9292	20.3763	3.08273		44.2703	107.376	5.77511	38.4952		1.66		0.00134709	0.00129738	0.0012495	0.00132578	0.00127685	0.00122974	0.00118436	0.00114065	0.00121099	0.0011663	0.00112327	0.00108181	0.00104189
2.8956	10	178968	18140.9	32.6821	6.19078	2.92	1853.74	#REF!	9.58052	9.5	0	0	0.924817	35.4026	45.4578	58.369	0.177013	1.93901		0.759168	1.07016	34.3551	-33.5959		24.596	20.7923	21.0806	3.51533		45.4578	106.188	6.12453	39.3333		1.68		0.00134637	0.00129669	0.00124884	0.00132429	0.00127542	0.00122836	0.00118303	0.00113937	0.00120892	0.00116431	0.00112135	0.00107997	0.00104011
3.048	10.5	197452	18484	33.3002	6.30787	2.94	1863.74	#REF!	9.64614	9.5	0	0	0.924817	36.3274	46.6453	59.8938	0.181637	2.12065		0.811116	1.01821	35.3122	-34.5011		25.6911	19.6972	21.7999	3.89123		46.6453	105.001	6.48592	40.1594		1.7		0.00133813	0.00128875	0.0012412	0.00131542	0.00126688	0.00122013	0.0011751	0.00113174	0.00120012	0.00115583	0.00111318	0.0010721	0.00103254
3.2004	11	224950	27497.9	49.5394	9.38396	2.96	1873.74	#REF!	9.71176	9.5	0	0	0.924817	37.2522	47.8328	61.4185	0.186261	2.30691		0.862309	0.967022	36.2862	-35.4239		26.7449	18.6434	22.5342	4.21071		47.8328	103.813	6.8594	40.9734		1.72		0.00132362	0.00127477	0.00122773	0.00130039	0.0012524	0.00120619	0.00116168	0.00111881	0.00118571	0.00114196	0.00109982	0.00105923	0.00102014
3.3528	11.5	246328	21377.2	38.5125	7.2952	2.98	1883.74	#REF!	9.77738	9.5	0	0	0.924817	38.177	49.0203	62.9433	0.190885	2.4978		0.912551	0.91678	37.2772	-36.3647		27.758	17.6303	23.2837	4.47427		49.0203	102.626	7.24512	41.7752		1.74		0.00130389	0.00125578	0.00120944	0.00128027	0.00123302	0.00118752	0.0011437	0.00110149	0.00116668	0.00112363	0.00108216	0.00104223	0.00100377
3.5052	12	269335	23007.3	41.4493	7.85149	3	1893.74	#REF!	9.843	9.5	0	0	0.924817	39.1019	50.2078	64.4681	0.195509	2.6933		0.961684	0.867647	38.2854	-37.3237		28.7314	16.6569	24.0486	4.68281		50.2078	101.438	7.64321	42.5646		1.76		0.0012799	0.00123266	0.00118718	0.00125598	0.00120963	0.00116499	0.001122	0.0010806	0.00114388	0.00110167	0.00106102	0.00102186	0.000984155
3.6576	12.5	294502	25167.1	45.3403	8.58855	3.02	1903.74	#REF!	9.90862	9.5	0	0	0.924817	40.0267	51.3953	65.9928	0.200133	2.89344		1.00958	0.819747	39.3108	-38.3012		29.6664	15.7219	24.829	4.83748		51.3953	100.251	8.05381	43.3415		1.78		0.00125244	0.00120622	0.00116171	0.00122833	0.001183	0.00113935	0.0010973	0.00105681	0.00111806	0.0010768	0.00103706	0.000998791	0.000961934
3.81	13	323608	29106.6	52.4376	9.93295	3.04	1913.74	#REF!	9.97424	9.5	0	0	0.924817	40.9515	52.5828	67.5176	0.204757	3.0982		1.05616	0.773175	40.3536	-39.2974		30.5644	14.8239	25.6249	4.93949		52.5828	99.0634	8.47706	44.1057		1.8		0.00122223	0.00117713	0.00113369	0.00119802	0.00115381	0.00111123	0.00107022	0.00103073	0.00108984	0.00104962	0.00101089	0.000973584	0.000937657
3.9624	13.5	356112	29106.6	52.4376	9.93295	3.06	1923.74	#REF!	10.0399	10	0	0	0.773848	41.7253	53.5764	68.7935	0.208627	3.30682		1.10132	0.728013	41.414	-40.3126		31.4261	13.9621	26.4367	4.98947		53.5764	98.0698	8.91309	44.6633		1.82		0.00118961	0.00114571	0.00110343	0.00116538	0.00112237	0.00108096	0.00104107	0.00100265	0.00105954	0.00102044	0.000982786	0.000946519	0.000911591
4.1148	14	382937	32503.4	58.5571	11.0921	3.08	1933.74	#REF!	10.1055	10	0	0	0.773848	42.4992	54.57	70.0693	0.212496	3.51932		1.14501	0.68432	42.492	-41.347		32.2524	13.1359	27.2643	4.98807		54.57	97.0761	9.36204	45.208		1.84		0.00115516	0.00111253	0.00107148	0.001131	0.00108926	0.00104907	0.00101035	0.000973071	0.0010277	0.000989778	0.000953253	0.000918076	0.000884197
4.2672	14.5	410370	26825.5	48.328	9.1545	3.1	1943.74	#REF!	10.1711	10	0	0	0.773848	43.273	55.5637	71.3452	0.216365	3.73568		1.1872	0.642133	43.5878	-42.4006		33.0439	12.3444	28.108	4.93592		55.5637	96.0825	9.82405	45.7396		1.86		0.00111941	0.0010781	0.00103832	0.00109538	0.00105496	0.00101603	0.000978538	0.000942428	0.000994779	0.000958069	0.000922715	0.000888665	0.000855871
4.4196	15	450869	27433	49.4225	9.36181	3.12	1953.74	#REF!	10.2367	10	0	0	0.773848	44.0469	56.5573	72.621	0.220234	3.95592		1.22786	0.601473	44.7017	-43.4738		33.8014	11.5869	28.9678	4.83363		56.5573	95.0889	10.2993	46.2581		1.88		0.00108278	0.00104282	0.00100434	0.00105896	0.00101988	0.000982242	0.000945996	0.000911087	0.00096116	0.000925691	0.000891532	0.000858633	0.000826947
4.572	15.5	468054	40498.5	72.9609	13.8206	3.14	1963.74	#REF!	10.3023	10	0	0	0.773848	44.8207	57.551	73.8969	0.224104	4.18002		1.26698	0.562348	45.8336	-44.5666		34.5252	10.8631	29.8439	4.68129		57.551	94.0952	10.7878	46.7632		1.9		0.00104565	0.00100706	0.000969898	0.00102208	0.00098436	0.000948036	0.000913051	0.000879358	0.000927174	0.00089296	0.000860008	0.000828272	0.000797707
4.7244	16	523254	17185.6	30.9611	5.86478	3.16	1973.74	#REF!	10.368	10	0	0	0.773848	45.5946	58.5446	75.1727	0.227973	4.40799		1.30458	0.524754	46.9837	-45.6791		35.2155	10.1728	30.7365	4.47895		58.5446	93.1016	11.2898	47.2548		1.92		0.00100832	0.000971108	0.000935272	0.000985052	0.000948702	0.000913693	0.000879976	0.000847503	0.000893097	0.00086014	0.0008284	0.00079783	0.000768389
4.8768	16.5	571045	55199.6	99.4459	18.8375	3.18	1983.74	#REF!	10.4336	10	0	0	0.773848	46.3684	59.5382	76.4486	0.231842	4.63984		1.34065	0.488677	48.1522	-46.8115		35.8723	9.51599	31.6457	4.2266		59.5382	92.1079	11.8054	47.7328		1.94		0.00097105	0.000935216	0.000900705	0.000948135	0.000913147	0.00087945	0.000846996	0.000815741	0.000859159	0.000827454	0.00079692	0.000767512	0.000739189
5.0292	17	612875	47791.1	86.099	16.3092	3.2	1993.74	#REF!	10.4992	10	0	0	0.773848	47.1423	60.5319	77.7245	0.235711	4.87555		1.37524	0.454094	49.3392	-47.964		36.4957	8.89254	32.5716	3.92417		60.5319	91.1143	12.3348	48.1971		1.96		0.000934065	0.000899596	0.0008664	0.000911536	0.000877899	0.000845503	0.000814302	0.000784253	0.00082555	0.000795086	0.000765746	0.000737488	0.000710273
5.1816	17.5	655298	41830	75.3597	14.2749	3.22	2003.74	#REF!	10.5648	10.5	0	0	0.901124	48.0434	61.6889	79.2102	0.240217	5.11576		1.40836	0.420974	50.5448	-49.1365		37.0863	8.302	33.5143	3.57196		61.6889	89.9572	12.878	48.8109		1.98		0.000897654	0.000864528	0.000832626	0.00087554	0.000843231	0.000812114	0.000782145	0.000753283	0.000792526	0.000763281	0.000735114	0.000707987	0.000681861
5.334	18	688000	42423.1	76.4282	14.4773	3.24	2013.74	#REF!	10.6304	10.5	0	0	0.901124	48.9445	62.846	80.6959	0.244723	5.36049		1.44005	0.38928	51.7693	-50.3292		37.6446	7.74365	34.4741	3.17057		62.846	88.8002	13.4353	49.4107		2		0.000861934	0.000830127	0.000799494	0.000840261	0.000809253	0.00077939	0.00075063	0.00072293	0.00076019	0.000732138	0.00070512	0.0006791	0.00065404
5.4864						3.26	2023.74	#REF!	10.6961	10.5	0	0	0.901124	49.8456	64.0031	82.1816	0.249228	5.60972		1.47036	0.358973	53.0126	-51.5422		38.1717	7.21658	35.4509	2.72077		64.0031	87.6431	14.0067	49.9963		2.02		0.000827004	0.000796486	0.000767094	0.000805791	0.000776056	0.000747418	0.000719837	0.000693273	0.000728624	0.000701736	0.000675841	0.000650901	0.000626881
						3.28	2033.74	#REF!	10.7617	10.5	0	0	0.901124	50.7468	65.1601	83.6673	0.253734	5.86345		1.49932	0.330011	54.275	-52.7757		38.6685	6.71974	36.4451	2.22347		65.1601	86.486	14.5925	50.5677		2.04		0.000792938	0.000763677	0.000735496	0.000772203	0.000743707	0.000716263	0.000689831	0.000664375	0.000697891	0.000672137	0.000647334	0.000623446	0.00060044
		2030	2080	2130		3.3	2043.74	#REF!	10.8273	10.5	0	0	0.901124	51.6479	66.3172	85.153	0.258239	6.12169		1.52698	0.302351	55.5566	-54.0296		39.1363	6.25194	37.4566	1.67973		66.3172	85.329	15.1926	51.1246		2.06		0.000759797	0.000731759	0.000704756	0.000739553	0.000712262	0.000685978	0.000660664	0.000636284	0.000668039	0.000643388	0.000619645	0.000596779	0.000574757
	12 ft wall	4.78	5.17	5.82		3.32	2053.74	#REF!	10.8929	10.5	0	0	0.901124	52.549	67.4743	86.6387	0.262745	6.38443		1.55338	0.275949	56.8575	-55.3041		39.5763	5.81196	38.4857	1.09062		67.4743	84.1719	15.8073	51.667		2.08		0.000727624	0.000700773	0.000674914	0.000707881	0.000681759	0.000656601	0.000632371	0.000609035	0.000639106	0.000615522	0.000592808	0.000570932	0.000549864
	Length	4326.35	4630.25	5077.96		3.34	2063.74	#REF!	10.9585	10.5	0	0	0.901124	53.4501	68.6313	88.1244	0.267251	6.65168		1.57857	0.250759	58.1779	-56.5993		39.9898	5.3985	39.5325	0.457311		68.6313	83.0148	16.4367	52.1946		2.1		0.000696451	0.000670751	0.000645999	0.000677217	0.000652227	0.000628158	0.000604978	0.000582653	0.000611114	0.000588563	0.000566844	0.000545926	0.00052578
	Cost	343.551	367.684	403.237		3.36	2073.74	#REF!	11.0242	11	0	0	1.173	54.6231	70.1375	90.0583	0.273116	6.9248		1.6026	0.226731	59.5178	-57.9152		40.3781	5.01019	40.5971	-0.21897		70.1375	81.5087	17.081	53.0565		2.12		0.00066643	0.000641838	0.000618153	0.000647706	0.000623805	0.000600785	0.000578615	0.000557263	0.000584193	0.000562635	0.000541873	0.000521877	0.000502618
						3.38	2083.74	#REF!	11.0898	11	0	0	1.173	55.7961	71.6437	91.9923	0.278981	7.20378		1.62551	0.203817	60.8776	-59.252		40.7426	4.64568	41.6796	-0.937002		71.6437	80.0025	17.7403	53.9034		2.14		0.00063754	0.000614014	0.000591356	0.000619326	0.000596472	0.000574461	0.000553262	0.000532846	0.000558321	0.000537718	0.000517875	0.000498764	0.000480359
						3.4	2093.74	#REF!	11.1554	11	0	0	1.173	56.9691	73.1498	93.9262	0.284846	7.48863		1.64736	0.18197	62.2571	-60.6098		41.0846	4.30365	42.7802	-1.6956		73.1498	78.4964	18.4146	54.7352		2.16		0.00060976	0.000587258	0.000565587	0.000592054	0.000570206	0.000549164	0.000528899	0.000509381	0.000533475	0.000513788	0.000494829	0.000476569	0.000458982
						3.42	2103.74	#REF!	11.221	11	0	0	1.173	58.1421	74.656	95.8602	0.290711	7.77934		1.66819	0.161143	63.6568	-61.9886		41.4055	3.98281	43.8991	-2.49363		74.656	76.9902	19.1042	55.5517		2.18		0.000583063	0.000561547	0.000540825	0.000565862	0.000544981	0.00052487	0.000505501	0.000486847	0.000509629	0.000490823	0.00047271	0.000455266	0.000438466
						3.44	2113.74	#REF!	11.2866	11	0	0	1.173	59.3151	76.1621	97.7941	0.296576	8.07591		1.68804	0.141293	65.0765	-63.3885		41.7063	3.68193	45.0363	-3.32998		76.1621	75.4841	19.8093	56.3529		2.2		0.000557424	0.000536854	0.000517043	0.000540725	0.000520771	0.000501553	0.000483045	0.00046522	0.000486757	0.000468795	0.000451495	0.000434834	0.000418788
						3.46	2123.74	#REF!	11.3523	11	0	0	1.173	60.4881	77.6683	99.728	0.302441	8.37835		1.70696	0.122375	66.5166	-64.8096		41.9884	3.39983	46.1921	-4.20361		77.6683	73.9779	20.5298	57.1385		2.22		0.000532816	0.000513154	0.000494218	0.000516612	0.000497548	0.000479188	0.000461505	0.000444474	0.000464832	0.000447679	0.000431158	0.000415248	0.000399924
						3.48	2133.74	#REF!	11.4179	11	0	0	1.173	61.6611	79.1744	101.662	0.308306	8.68666		1.72498	0.10435	67.977	-66.2521		42.2529	3.13537	47.3664	-5.11353		79.1744	72.4717	21.266	57.9084		2.24		0.00050921	0.000490419	0.000472321	0.000493495	0.000475284	0.000457746	0.000440854	0.000424586	0.000443825	0.000427447	0.000411673	0.000396482	0.000381851
						3.5	2143.74	#REF!	11.4835	11	0	0	1.173	62.8341	80.6806	103.596	0.314171	9.00083		1.74216	0.0871752	69.4581	-67.7159		42.5008	2.88749	48.5596	-6.0588		80.6806	70.9656	22.018	58.6626		2.26		0.000486575	0.00046862	0.000451327	0.000471344	0.00045395	0.000437199	0.000421065	0.000405527	0.000423707	0.000408071	0.000393013	0.00037851	0.000364542
						3.52	2153.74	#REF!	11.5491	11.5	0	0	1.04217	63.8763	82.0188	105.314	0.319381	9.32021		1.75852	0.0708149	70.9598	-69.2013		42.7331	2.65517	49.7717	-7.03855		82.0188	69.6274	22.786	59.2328		2.28		0.000464851	0.000447697	0.000431176	0.000450096	0.000433486	0.00041749	0.000402084	0.000387246	0.000404421	0.000389497	0.000375124	0.000361281	0.000347949
						3.54	2163.74	#REF!	11.6147	11.5	0	0	1.04217	64.9184	83.3569	107.032	0.324592	9.6448		1.7741	0.0552326	72.4824	-70.7083		42.9508	2.43745	51.0028	-8.05196		83.3569	68.2892	23.57	59.7869		2.3		0.000444013	0.000427628	0.000411848	0.000429727	0.000413869	0.000398597	0.000383888	0.000369722	0.000385945	0.000371703	0.000357986	0.000344776	0.000332053
						3.56	2173.74	#REF!	11.6804	11.5	0	0	1.04217	65.9606	84.6951	108.751	0.329803	9.97461		1.78894	0.0403931	74.0259	-72.237		43.1548	2.23345	52.2531	-9.09827		84.6951	66.9511	24.3703	60.3248		2.32		0.000424038	0.000408391	0.00039332	0.000410213	0.000395076	0.000380497	0.000366456	0.000352933	0.000368254	0.000354665	0.000341577	0.000328972	0.000316833
						3.58	2183.74	#REF!	11.746	11.5	0	0	1.04217	67.0028	86.0333	110.469	0.335014	10.3096		1.80307	0.0262626	75.5906	-73.7875		43.346	2.04229	53.5227	-10.1767		86.0333	65.6129	25.1869	60.8464		2.34		0.000404902	0.00038996	0.00037557	0.000391529	0.000377081	0.000363166	0.000349764	0.000336857	0.000351325	0.000338361	0.000325874	0.000313849	0.000302267
						3.6	2193.74	#REF!	11.8116	11.5	0	0	1.04217	68.045	87.3715	112.187	0.340225	10.6498		1.81652	0.0128087	77.1765	-75.36		43.5251	1.86316	54.8118	-11.2867		87.3715	64.2747	26.02	61.3515		2.36		0.000386577	0.000372312	0.000358573	0.000373647	0.000359859	0.00034658	0.00033379	0.000321473	0.000335133	0.000322766	0.000310855	0.000299384	0.000288336
						3.62	2203.74	#REF!	11.8772	11.5	0	0	1.04217	69.0871	88.7096	113.905	0.345436	10.9953		1.82933	0	78.7838	-76.9545		43.693	1.69531	56.1206	-12.4276		88.7096	62.9365	26.8697	61.8399		2.38		0.000369038	0.00035542	0.000342304	0.000356542	0.000343385	0.000330713	0.000318509	0.000306756	0.000319652	0.000307856	0.000296496	0.000285555	0.000275017
						3.64	2213.74	#REF!	11.9428	11.5	0	0	1.04217	70.1293	90.0478	115.624	0.350647	11.3459							43.8503	1.53801	57.449	-13.5987		90.0478	61.5984	27.7362	62.3116		2.4		0.000352259	0.00033926	0.000326741	0.000340186	0.000327633	0.000315542	0.000303898	0.000292684	0.000304858	0.000293608	0.000282773	0.000272338	0.000262288
						3.66	2223.74	#REF!	12.0085	12	0	0	0.981437	71.1107	91.308	117.242	0.355554	11.7015							43.9977	1.3906	58.7973	-14.7997		91.308	60.3382	28.6196	62.6884		2.42		0.000336204	0.000323797	0.000311848	0.000324545	0.000312568	0.000301034	0.000289925	0.000279226	0.000290717	0.000279989	0.000269657	0.000259706	0.000250122
						3.68	2233.74	#REF!	12.0741	12	0	0	0.981437	72.0922	92.5682	118.86	0.360461	12.0619							44.1358	1.25245	60.1657	-16.0298		92.5682	59.078	29.52	63.0482		2.44		0.000320848	0.000309008	0.000297605	0.000309592	0.000298168	0.000287165	0.000276568	0.000266362	0.000277207	0.000266977	0.000257125	0.000247637	0.000238498
						3.7	2243.74	#REF!	12.1397	12	0	0	0.981437	73.0736	93.8284	120.478	0.365368	12.4273							44.2653	1.12295	61.5542	-17.2888		93.8284	57.8178	30.4376	63.3908		2.46		0.000306166	0.000294868	0.000283987	0.000295305	0.000284407	0.000273912	0.000263804	0.000254069	0.000264303	0.00025455	0.000245157	0.00023611	0.000227397
						3.72	2253.74	#REF!	12.2053	12	0	0	0.981437	74.0551	95.0886	122.096	0.370275	12.7976							44.3867	1.00156	62.9629	-18.5762		95.0886	56.5576	31.3725	63.716		2.48		0.000292135	0.000281355	0.000270972	0.000281657	0.000271263	0.000261253	0.000251612	0.000242327	0.000251984	0.000242686	0.00023373	0.000225105	0.000216798
						3.74	2263.74	#REF!	12.2709	12	0	0	0.981437	75.0365	96.3488	123.714	0.375182	13.1728							44.5005	0.887756	64.3922	-19.8916		96.3488	55.2974	32.3249	64.0238		2.5		0.00027873	0.000268445	0.000258538	0.000268624	0.000258711	0.000249164	0.00023997	0.000231114	0.000240227	0.000231362	0.000222824	0.000214602	0.000206682
						3.76	2273.74	#REF!	12.3366	12	0	0	0.981437	76.0179	97.609	125.332	0.38009	13.5529							44.6072	0.781047	65.8419	-21.2347		97.609	54.0372	33.2949	64.3141		2.52		0.000265927	0.000256114	0.000246663	0.000256182	0.000246729	0.000237624	0.000228855	0.00022041	0.000229008	0.000220557	0.000212418	0.00020458	0.00019703
						3.78	2283.74	#REF!	12.4022	12	0	0	0.981437	76.9994	98.8691	126.95	0.384997	13.9379							44.7073	0.680977	67.3124	-22.6051		98.8691	52.777	34.2826	64.5866		2.54		0.000253701	0.000244339	0.000235323	0.000244309	0.000235293	0.00022661	0.000218248	0.000210194	0.000218307	0.000210251	0.000202492	0.00019502	0.000187823
						3.8	2293.74	#REF!	12.4678	12	0	0	0.981437	77.9808	100.129	128.569	0.389904	14.3278							44.8012	0.587117	68.8037	-24.0025		100.129	51.5168	35.2881	64.8412		2.56		0.000242031	0.0002331	0.000224498	0.000232979	0.000224382	0.000216102	0.000208127	0.000200447	0.000208101	0.000200421	0.000193026	0.000185903	0.000179042
						3.82	2303.74	#REF!	12.5334	12.5	0	0	1.07357	79.0544	101.508	130.339	0.395272	14.723							44.8892	0.499065	70.316	-25.4268		101.508	50.1383	36.3117	65.1961		2.58		0.0002309	0.000222379	0.000214173	0.000222178	0.000213979	0.000206083	0.000198478	0.000191154	0.000198376	0.000191055	0.000184005	0.000177215	0.000170675
						3.84	2313.74	#REF!	12.599	12.5	0	0	1.07357	80.1279	102.886	132.109	0.40064	15.1237							44.9718	0.416445	71.8494	-26.8776		102.886	48.7599	37.3534	65.5329		2.6		0.000220284	0.000212155	0.000204326	0.000211882	0.000204064	0.000196533	0.000189281	0.000182296	0.00018911	0.000182131	0.00017541	0.000168937	0.000162703
						3.86	2323.74	#REF!	12.6647	12.5	0	0	1.07357	81.2015	104.265	133.879	0.406008	15.5297							45.0494	0.338904	73.404	-28.3547		104.265	47.3814	38.4133	65.8515		2.62		0.000210162	0.000202406	0.000194937	0.000202069	0.000194613	0.000187431	0.000180514	0.000173853	0.000180282	0.000173629	0.000167222	0.000161051	0.000155108
						3.88	2333.74	#REF!	12.7303	12.5	0	0	1.07357	82.2751	105.643	135.649	0.411375	15.9411							45.1222	0.266115	74.9801	-29.8579		105.643	46.0029	39.4917	66.1516		2.64		0.00020051	0.000193111	0.000185985	0.000192717	0.000185605	0.000178756	0.00017216	0.000165807	0.000171873	0.00016553	0.000159422	0.000153539	0.000147873
						3.9	2343.74	#REF!	12.7959	12.5	0	0	1.07357	83.3486	107.022	137.419	0.416743	16.3578							45.1905	0.197771	76.5776	-31.3871		107.022	44.6244	40.5887	66.4331		2.66		0.000191308	0.000184248	0.000177449	0.000183804	0.000177021	0.000170489	0.000164198	0.000158138	0.000163863	0.000157816	0.000151992	0.000146383	0.000140981
						3.92	2353.74	#REF!	12.8615	12.5	0	0	1.07357	84.4222	108.4	139.189	0.422111	16.7799							45.2547	0.133587	78.1968	-32.9422		108.4	43.2459	41.7043	66.696		2.68		0.000182535	0.000175799	0.000169312	0.000175311	0.000168842	0.000162611	0.00015661	0.000150831	0.000156233	0.000150468	0.000144915	0.000139567	0.000134417
						3.94	2363.74	#REF!	12.9271	12.5	0	0	1.07357	85.4958	109.779	140.959	0.427479	17.2074							45.2851	0.10321	79.8379	-34.5528		109.779	41.8674	42.8387	66.94		2.7		0.000174172	0.000167745	0.000161555	0.000167218	0.000161047	0.000155105	0.000149381	0.000143868	0.000148966	0.000143469	0.000138175	0.000133076	0.000128165
						3.96	2373.74	#REF!	12.9928	12.5	0	0	1.07357	86.5694	111.157	142.729	0.432847	17.6402							45.3135	0.0747939	81.5008	-36.1873		111.157	40.4889	43.9921	67.1651		2.72		0.0001662	0.000160067	0.000154161	0.000159507	0.000153621	0.000147952	0.000142492	0.000137234	0.000142045	0.000136803	0.000131755	0.000126893	0.00012221
						3.98	2383.74	#REF!	13.0584	13	0	0	1.41899	87.9883	112.979	145.068	0.439942	18.0802							45.3401	0.0482024	83.1859	-37.8458		112.979	38.6669	45.1646	67.8147		2.74		0.000158617	0.000152764	0.000147126	0.000152175	0.000146559	0.000141151	0.000135942	0.000130925	0.000135466	0.000130467	0.000125653	0.000121016	0.00011655
						4	2393.74	#REF!	13.124	13	0	0	1.41899	89.4073	114.801	147.408	0.447037	18.5272							45.365	0.0233099	84.8931	-39.5281		114.801	36.8449	46.3564	68.4449		2.76		0.000151401	0.000145814	0.000140433	0.000145201	0.000139842	0.000134682	0.000129712	0.000124925	0.000129212	0.000124444	0.000119851	0.000115429	0.000111169
						4.02	2403.74	#REF!	13.1896	13	0	0	1.41899	90.8263	116.623	149.747	0.454132	18.9813							45.3883	0	86.6227	-41.2344		116.623	35.0229	47.5675	69.0558		2.78		0.000144534	0.000139201	0.000134064	0.000138566	0.000133453	0.000128528	0.000123785	0.000119217	0.000123264	0.000118716	0.000114335	0.000110116	0.000106052
						4.04	3649.13	#REF!	13.2552	13	0	0	1.41899	92.2453	118.445	152.087	0.461227	19.4426												118.445	33.2008	73.7736	44.6717		2.8		0.000137998	0.000132906	0.000128001	0.000132254	0.000127374	0.000122673	0.000118146	0.000113787	0.000117608	0.000113268	0.000109088	0.000105063	0.000101186
						4.06	3669.57	#REF!	13.3209	13	0	0	1.41899	93.6643	120.267	154.426	0.468322	19.9109												120.267	31.3788	75.7737	44.4936		2.82		0.000131775	0.000126913	0.000122229	0.000126247	0.000121588	0.000117101	0.00011278	0.000108618	0.000112227	0.000108086	0.000104097	0.000100256	9.65564e-05
						4.08	3689.88	#REF!	13.3865	13	0	0	1.41899	95.0833	122.089	156.766	0.475417	20.3863												122.089	29.5568	77.8055	44.2839		2.84		0.00012585	0.000121206	0.000116733	0.00012053	0.000116082	0.000111798	0.000107673	0.000103699	0.000107108	0.000103155	9.93489e-05	9.56827e-05	9.21518e-05
						4.1	3710.05	#REF!	13.4521	13	0	0	1.41899	96.5023	123.911	159.105	0.482511	20.8688												123.911	27.7348	79.8692	44.0422		2.86		0.000120208	0.000115772	0.000111499	0.000115087	0.00011084	0.00010675	0.00010281	9.90164e-05	0.000102236	9.84637e-05	9.48302e-05	9.13308e-05	8.79605e-05
						4.12	3730.09	#REF!	13.5177	13.5	0	0	1.24162	97.7439	125.506	161.152	0.48872	21.3575												125.506	26.1405	81.9648	43.5409		2.88		0.000114828	0.000110591	0.00010651	0.0001099	0.000105844	0.000101938	9.81766e-05	9.45537e-05	9.75957e-05	9.39943e-05	9.05257e-05	8.71851e-05	8.39678e-05
						4.14	3750	#REF!	13.5833	13.5	0	0	1.24162	98.9855	127.1	163.2	0.494928	21.8525												127.1	24.5462	84.0925	43.0074		2.9		0.000109699	0.000105651	0.000101753	0.000104956	0.000101083	9.73531e-05	9.37606e-05	9.03007e-05	9.31748e-05	8.97365e-05	8.6425e-05	8.32358e-05	8.01642e-05
						4.16	3769.77	#REF!	13.649	13.5	0	0	1.24162	100.227	128.694	165.247	0.501136	22.3536												128.694	22.952	86.2525	42.4418		2.92		0.000104809	0.000100942	9.72167e-05	0.000100245	9.65458e-05	9.2983e-05	8.95518e-05	8.62472e-05	8.89628e-05	8.56799e-05	8.25182e-05	7.94731e-05	7.65404e-05
						4.18	3789.43	#REF!	13.7146	13.5	0	0	1.24162	101.469	130.288	167.294	0.507344	22.8609												130.288	21.3577	88.4448	41.8437		2.94		0.000100147	9.6451e-05	9.28918e-05	9.57543e-05	9.22208e-05	8.88176e-05	8.55401e-05	8.23835e-05	8.49497e-05	8.18149e-05	7.87958e-05	7.58881e-05	7.30877e-05
						4.2	3808.95	#REF!	13.7802	13.5	0	0	1.24162	102.71	131.883	169.341	0.513552	23.3745												131.883	19.7634	90.6696	41.2132		2.96		9.57003e-05	9.21688e-05	8.87676e-05	9.14736e-05	8.80981e-05	8.48471e-05	8.17161e-05	7.87006e-05	8.11258e-05	7.81321e-05	7.52489e-05	7.2472e-05	6.97977e-05
						4.22	3828.35	#REF!	13.8458	13.5	0	0	1.24162	103.952	133.477	171.388	0.51976	23.8943												133.477	18.1691	92.927	40.55		2.98		9.14602e-05	8.80851e-05	8.48346e-05	8.73929e-05	8.4168e-05	8.1062e-05	7.80707e-05	7.51897e-05	7.74818e-05	7.46226e-05	7.18689e-05	6.92168e-05	6.66626e-05
						4.24	3847.62	#REF!	13.9114	13.5	0	0	1.24162	105.194	135.071	173.435	0.525968	24.4202												135.024	16.6222	95.2172	39.8068		3		8.74163e-05	8.41904e-05	8.10837e-05	8.35025e-05	8.04211e-05	7.74534e-05	7.45953e-05	7.18426e-05	7.40091e-05	7.1278e-05	6.86477e-05	6.61145e-05	6.36747e-05
						4.26	3866.78	#REF!	13.9771	13.5	0	0	1.24162	106.435	136.666	175.482	0.532176	24.9524												136.45	15.196	97.5402	38.9099		3.02		8.35593e-05	8.04758e-05	7.75061e-05	7.97933e-05	7.68488e-05	7.40129e-05	7.12817e-05	6.86513e-05	7.06993e-05	6.80903e-05	6.55777e-05	6.31577e-05	6.08271e-05
						4.28	3885.81	#REF!	14.0427	14	0	0	1.58459	108.02	138.7	178.095	0.540099	25.4925												137.765	13.8811	99.8963	37.8688		3.04		7.98857e-05	7.69378e-05	7.40986e-05	7.62617e-05	7.34475e-05	7.07371e-05	6.81268e-05	6.56128e-05	6.75491e-05	6.50564e-05	6.26557e-05	6.03436e-05	5.81168e-05
						4.3	3904.73	#REF!	14.1083	14	0	0	1.58459	109.604	140.735	180.707	0.548022	26.0405												138.977	12.6688	102.285	36.6919		3.06		7.6386e-05	7.35672e-05	7.08524e-05	7.28984e-05	7.02083e-05	6.76175e-05	6.51223e-05	6.27191e-05	6.455e-05	6.2168e-05	5.98739e-05	5.76644e-05	5.55365e-05
						4.32	3923.52	#REF!	14.1739	14	0	0	1.58459	111.189	142.77	183.32	0.555945	26.5965												140.095	11.5508	104.708	35.3874		3.08		7.30511e-05	7.03554e-05	6.77592e-05	6.96946e-05	6.71228e-05	6.46458e-05	6.22603e-05	5.99627e-05	6.16943e-05	5.94176e-05	5.7225e-05	5.51133e-05	5.30795e-05
						4.34	3942.2	#REF!	14.2395	14	0	0	1.58459	112.774	144.804	185.932	0.563868	27.1603												141.126	10.5197	107.164	33.9627		3.1		6.98728e-05	6.72943e-05	6.48111e-05	6.66423e-05	6.4183e-05	6.18146e-05	5.95335e-05	5.73366e-05	5.89744e-05	5.67981e-05	5.47021e-05	5.26835e-05	5.07394e-05
						4.36	3960.77	#REF!	14.3052	14	0	0	1.58459	114.358	146.839	188.545	0.571791	27.7321												142.078	9.56847	109.653	32.4247		3.12		6.68429e-05	6.43763e-05	6.20007e-05	6.37335e-05	6.13816e-05	5.91165e-05	5.6935e-05	5.4834e-05	5.63833e-05	5.43026e-05	5.22988e-05	5.03688e-05	4.85101e-05
						4.38	3979.22	#REF!	14.3708	14	0	0	1.58459	115.943	148.873	191.157	0.579714	28.3118												142.955	8.69069	112.176	30.7795		3.14		6.39541e-05	6.1594e-05	5.93211e-05	6.0961e-05	5.87114e-05	5.65448e-05	5.44582e-05	5.24486e-05	5.39145e-05	5.19249e-05	5.00088e-05	4.81634e-05	4.6386e-05
						4.4	3997.56	#REF!	14.4364	14	0	0	1.58459	117.527	150.908	193.77	0.587637	28.8995												143.766	7.88043	114.733	29.0331		3.16		6.11991e-05	5.89407e-05	5.67657e-05	5.83179e-05	5.61658e-05	5.40932e-05	5.20971e-05	5.01746e-05	5.15616e-05	4.96589e-05	4.78264e-05	4.60615e-05	4.43617e-05
						4.42	4015.79	#REF!	14.502	14.5	0	0	1.14431	118.672	152.377	195.657	0.593359	29.4928												144.514	7.1323	117.323	27.1907		3.18		5.85669e-05	5.64057e-05	5.43242e-05	5.57934e-05	5.37345e-05	5.17516e-05	4.98419e-05	4.80026e-05	4.93152e-05	4.74954e-05	4.57427e-05	4.40547e-05	4.2429e-05
						4.44	4033.91	#REF!	14.5676	14.5	0	0	1.14431	119.816	153.847	197.543	0.59908	30.0919												145.205	6.44133	119.948	25.2572		3.2		5.60521e-05	5.39836e-05	5.19915e-05	5.33823e-05	5.14124e-05	4.95152e-05	4.7688e-05	4.59282e-05	4.71703e-05	4.54297e-05	4.37532e-05	4.21386e-05	4.05836e-05
						4.46	4051.92	#REF!	14.6333	14.5	0	0	1.14431	120.96	155.316	199.43	0.604802	30.6967												145.843	5.80295	122.606	23.2371		3.22		5.36492e-05	5.16695e-05	4.97628e-05	5.10793e-05	4.91944e-05	4.73791e-05	4.56307e-05	4.39468e-05	4.51224e-05	4.34573e-05	4.18536e-05	4.03091e-05	3.88217e-05
						4.48	4069.82	#REF!	14.6989	14.5	0	0	1.14431	122.105	156.785	201.317	0.610523	31.3072												146.433	5.21296	125.299	21.1343		3.24		5.13533e-05	4.94583e-05	4.76332e-05	4.88796e-05	4.70759e-05	4.53387e-05	4.36656e-05	4.20543e-05	4.31669e-05	4.1574e-05	4.00398e-05	3.85623e-05	3.71392e-05
						4.5	4087.62	#REF!	14.7645	14.5	0	0	1.14431	123.249	158.255	203.203	0.616245	31.9235												146.979	4.66748	128.026	18.9527		3.26		4.91596e-05	4.73455e-05	4.55984e-05	4.67784e-05	4.50522e-05	4.33897e-05	4.17886e-05	4.02465e-05	4.12996e-05	3.97756e-05	3.83078e-05	3.68942e-05	3.55327e-05
						4.52	4105.31	#REF!	14.8301	14.5	0	0	1.14431	124.393	159.724	205.09	0.621966	32.5455												147.483	4.16298	130.788	16.6957		3.28		4.70634e-05	4.53266e-05	4.3654e-05	4.47713e-05	4.31192e-05	4.1528e-05	3.99955e-05	3.85196e-05	3.95165e-05	3.80583e-05	3.66538e-05	3.53012e-05	3.39986e-05
						4.54	4122.9	#REF!	14.8957	14.5	0	0	0	124.393	159.724	205.09	0.621966	33.1674												147.95	3.69627	133.584	14.3663		3.3		4.50525e-05	4.33899e-05	4.17888e-05	4.28465e-05	4.12654e-05	3.97427e-05	3.82761e-05	3.68636e-05	3.78071e-05	3.6412e-05	3.50683e-05	3.37742e-05	3.25279e-05
						4.56	4140.39	#REF!	14.9614	14.5	0	0	0	124.393	159.724	205.09	0.621966	33.7894												148.382	3.26443	136.414	11.9674		3.32		4.31241e-05	4.15327e-05	4.00001e-05	4.10014e-05	3.94884e-05	3.80312e-05	3.66277e-05	3.52761e-05	3.61691e-05	3.48343e-05	3.35489e-05	3.23109e-05	3.11185e-05
						4.58	4157.78	#REF!	15.027	15	0	0	0	124.393	159.724	205.09	0.621966	34.4114												148.781	2.86474	139.28	9.50164		3.34		4.12754e-05	3.97522e-05	3.82853e-05	3.92331e-05	3.77853e-05	3.6391e-05	3.50481e-05	3.37547e-05	3.45997e-05	3.33229e-05	3.20933e-05	3.0909e-05	2.97684e-05
						4.6	4175.07	#REF!	15.0926	15	0	0	0	124.393	159.724	205.09	0.621966	35.0333												149.151	2.49471	142.18	6.97129		3.36		3.95036e-05	3.80459e-05	3.66419e-05	3.7539e-05	3.61537e-05	3.48196e-05	3.35347e-05	3.22972e-05	3.30967e-05	3.18754e-05	3.06991e-05	2.95663e-05	2.84752e-05
						4.62	4192.25	#REF!	15.1582	15	0	0	0	124.393	159.724	205.09	0.621966	35.6553												149.494	2.15206	145.116	4.37858		3.38		3.78061e-05	3.6411e-05	3.50673e-05	3.59163e-05	3.45909e-05	3.33144e-05	3.20851e-05	3.09011e-05	3.16576e-05	3.04893e-05	2.93642e-05	2.82806e-05	2.7237e-05
						4.64	4209.35	#REF!	15.2238	15	0	0	0	124.393	159.724	205.09	0.621966	36.2773												149.812	1.83465	148.086	1.72552		3.4		3.618e-05	3.48449e-05	3.35591e-05	3.43624e-05	3.30944e-05	3.18731e-05	3.0697e-05	2.95642e-05	3.02799e-05	2.91625e-05	2.80864e-05	2.70499e-05	2.60517e-05
						4.66	4226.34	#REF!	15.2895	15	0	0	0	124.393	159.724	205.09	0.621966	36.8992												150.106	1.54054	151.092	-0.986054		3.42		3.46227e-05	3.33451e-05	3.21146e-05	3.28748e-05	3.16616e-05	3.04933e-05	2.9368e-05	2.82843e-05	2.89614e-05	2.78926e-05	2.68634e-05	2.5872e-05	2.49173e-05
						4.68	4243.24	#REF!	15.3551	15	0	0	0	124.393	159.724	205.09	0.621966	37.5212												150.378	1.26794	154.133	-3.75445		3.44		3.31316e-05	3.1909e-05	3.07315e-05	3.14508e-05	3.02902e-05	2.91725e-05	2.8096e-05	2.70592e-05	2.76997e-05	2.66775e-05	2.56931e-05	2.4745e-05	2.38318e-05
						4.7	4260.05	#REF!	15.4207	15	0	0	0	124.393	159.724	205.09	0.621966	38.1431												150.631	1.01519	157.209	-6.57814		3.46
						4.72	4276.76	#REF!	15.4863	15	0	0	0	124.393	159.724	205.09	0.621966	38.7651												150.865	0.78077	160.321	-9.45568		3.48
						4.74	4293.38	#REF!	15.5519	15.5	0	0	0	124.393	159.724	205.09	0.621966	39.3871												151.083	0.563282	163.469	-12.3858		3.5
						4.76	4309.91	#REF!	15.6176	15.5	0	0	0	124.393	159.724	205.09	0.621966	40.009												151.285	0.361433	166.652	-15.3673		3.52
						4.78	4326.35	#REF!	15.6832	15.5	0	0	0	124.393	159.724	205.09	0.621966	40.631												151.472	0.174037	169.871	-18.3991		3.54
						4.8	4342.7	#REF!	15.7488	15.5	0	0	0	124.393	159.724	205.09	0.621966	41.253												151.646	0	173.126	-21.4802		3.56
						4.82	4358.96	#REF!	15.8144	15.5	0	0	0	124.393	159.724	205.09	0.621966	41.8749																	3.58
						4.84	4375.13	#REF!	15.88	15.5	0	0	0	124.393	159.724	205.09	0.621966	42.4969																	3.6
						4.86	4391.22	#REF!	15.9457	15.5	0	0	0	124.393	159.724	205.09	0.621966	43.1189																	3.62
						4.88	4407.23	#REF!	16.0113	16	0	0	0	124.393	159.724	205.09	0.621966	43.7408																	3.64
						4.9	4423.14	#REF!	16.0769	16	0	0	0	124.393	159.724	205.09	0.621966	44.3628																	3.66
						4.92	4438.98	#REF!	16.1425	16	0	0	0	124.393	159.724	205.09	0.621966	44.9848																	3.68
						4.94	4454.73	#REF!	16.2081	16	0	0	0	124.393	159.724	205.09	0.621966	45.6067																	3.7
						4.96	4470.41	#REF!	16.2738	16	0	0	0	124.393	159.724	205.09	0.621966	46.2287																	3.72
							0
							0
							0
							0
							0
							0
							0
							0
							0
							0
							0
							0
							0
							0
							0
							0
							0
							0
							0
							0
							0
							0
							0
							0
[truncated: 138 more columns]

## Sheet: Bridgeport_4
																																					0.169375	0.173475	0.167073	0.178052	0.171482	0.165154	0.159059	0.15319	0.163489	0.157456	0.151646	0.14605	0.14066
																																					0	1	2	3	4	5	6	7	8	9	10	11	12
	INPUTS			ERROR CHECK		Surge height (m)	Wall Length (m)	sum of middleH * dL	Surge height (ft)	Rounding (ft)	delta Area (sq m)	Building numbers	Building Values (million $)	Cum Value	2080	2130	Marginal Damage	Damage	2030	Expected Benefit (million $, PV)	Residual Dam (million $, PV)	Cost (Million $)	Net Benefit (million $, PV)	2080	Expected Benefit (million $, PV)	Residual Dam (million $, PV)	Cost (Million $)	Net Benefit (million $, PV)	2130	Expected Benefit (million $, PV)	Residual Dam (million $, PV)	Cost (million $)	Net Benefit (million $, PV)		Surge height (m)		0	1	2	3	4	5	6	7	8	9	10	11	12
	SPATIAL DATA					1.8	731.818	#REF!	5.9058	5.5	0	0	0	0	0	0	0	0		0	7.14049	1.93561	-1.93561		0	79.5419	0.01	-0.01		0	0	0.01	-0.01		1.8		0	0	0	0	0	0	0	0	0	0	0	0	0
	Target City	Bridgeport				1.82	763.52	#REF!	5.97142	5.5	0	0	0	0	0	0	0	0		0	7.14049	2.13999	-2.13999		0	79.5419	0.01	-0.01		0	0	0.01	-0.01		1.82		0	0	0	0	0	0	0	0	0	0	0	0	0
	Policy Year (base year: 2020)	#REF!				1.84	795.632	#REF!	6.03704	6	0	0	0.076295	0.076295	0.0979648	0.125789	0.000381475	0.000381475		0.00748727	7.133	2.35925	-2.35176		0	79.5419	0.01	-0.01		0	0	0.01	-0.01		1.84		0.00012014	0.000115707	0.000111437	0.000129812	0.000125021	0.000120408	0.000115964	0.000111685	0.000130337	0.000125527	0.000120895	0.000116434	0.000112137
	SLR rate (before policy)	3.14	mm/year			1.86	828.161	#REF!	6.10266	6	0	0	0.076295	0.15259	0.19593	0.251578	0.00076295	0.00114443		0.0276873	7.1128	2.59403	-2.56634		0	79.5419	0.580293	-0.580293		0	0	0.01	-0.01		1.86		0.000298635	0.000287615	0.000277001	0.000321975	0.000310093	0.00029865	0.00028763	0.000277015	0.000322691	0.000310783	0.000299315	0.00028827	0.000277632
	SLR rate (after policy)	#REF!	mm/year			1.88	861.117	#REF!	6.16828	6	0	0	0.076295	0.228885	0.293894	0.377368	0.00114443	0.00228885		0.0656619	7.07483	2.84502	-2.77936		0	79.5419	0.674313	-0.674313		0	0	0.01	-0.01		1.88		0.000496164	0.000477854	0.000460221	0.000533559	0.00051387	0.000494907	0.000476644	0.000459055	0.000533586	0.000513896	0.000494932	0.000476668	0.000459078
	MHHW	1.06	meter			1.9	894.505	#REF!	6.2339	6	0	0	0.076295	0.30518	0.391859	0.503157	0.0015259	0.00381475		0.120179	7.02031	3.11292	-2.99274		0.00235763	79.5395	0.77823	-0.775873		0	0	0.01	-0.01		1.9		0.000689065	0.000663637	0.000639147	0.000738729	0.000711469	0.000685214	0.000659929	0.000635576	0.000736858	0.000709667	0.000683478	0.000658257	0.000633966
						1.92	928.335	#REF!	6.29952	6	0	0	0.076295	0.381475	0.489824	0.628946	0.00190738	0.00572213		0.187516	6.95297	3.39845	-3.21093		0.0351619	79.5067	0.892624	-0.857462		0	0	0.01	-0.01		1.92		0.000864384	0.000832487	0.000801766	0.000923343	0.00088927	0.000856454	0.000824849	0.000794411	0.000918183	0.0008843	0.000851668	0.00082024	0.000789971
						1.94	962.613	#REF!	6.36514	6	0	0	0.076295	0.45777	0.587789	0.754735	0.00228885	0.00801098		0.265251	6.87524	3.70233	-3.43708		0.15194	79.3899	1.01809	-0.866146		0	0	0.01	-0.01		1.94		0.00101631	0.000978804	0.000942685	0.00108105	0.00104116	0.00100274	0.000965735	0.000930097	0.00107113	0.00103161	0.000993538	0.000956875	0.000921564
	GEV ESTIMATION					1.96	997.346	#REF!	6.43076	6	0	0	0.076295	0.534065	0.685753	0.880525	0.00267033	0.0106813		0.350855	6.78963	4.02532	-3.67447		0.377377	79.1645	1.15523	-0.777849		0	0	0.01	-0.01		1.96		0.00114362	0.00110142	0.00106078	0.00121053	0.00116586	0.00112284	0.0010814	0.0010415	0.00119437	0.00115029	0.00110784	0.00106696	0.00102759
	μ (location)	1.845				1.98	1032.54	#REF!	6.49638	6	0	0	0.076295	0.61036	0.783718	1.00631	0.0030518	0.0137331		0.441939	6.69855	4.36818	-3.92624		0.674282	78.8676	1.30467	-0.630384		0	0	0.01	-0.01		1.98		0.00124793	0.00120188	0.00115753	0.00131353	0.00126506	0.00121837	0.00117341	0.00113011	0.00128965	0.00124206	0.00119623	0.00115208	0.00110957
	σ (scale)	0.1544				2	1068.21	#REF!	6.562	6.5	0	0	0.208638	0.818999	1.05162	1.3503	0.00409499	0.0178281		0.540023	6.60046	4.7317	-4.19167		1.05162	78.4903	1.46705	-0.415431		0	0	0.01	-0.01		2		0.00138377	0.00133271	0.00128353	0.00144723	0.00139383	0.00134239	0.00129285	0.00124515	0.00141295	0.00136081	0.0013106	0.00126223	0.00121565
	k (shape)	0.0752				2.02	1104.35	#REF!	6.62762	6.5	0	0	0.208638	1.02764	1.31951	1.69429	0.00513819	0.0229663		0.645127	6.49536	5.11666	-4.47154		1.31951	78.2224	1.64302	-0.323505		0	0	0.01	-0.01		2.02		0.00153355	0.00147696	0.00142246	0.00159243	0.00153367	0.00147707	0.00142257	0.00137007	0.00154481	0.00148781	0.00143291	0.00138003	0.0013291
						2.04	1140.97	#REF!	6.69324	6.5	0	0	0.208638	1.23628	1.58741	2.03827	0.00618138	0.0291477		0.756457	6.38403	5.5239	-4.76744		1.58741	77.9545	1.83325	-0.245841		0	0	0.01	-0.01		2.04		0.00168771	0.00162543	0.00156545	0.00173869	0.00167453	0.00161274	0.00155322	0.00149591	0.00167466	0.00161286	0.00155335	0.00149602	0.00144082
	Coefficients of the cost function					2.06	1178.08	#REF!	6.75886	6.5	0	0	0.208638	1.44491	1.85531	2.38226	0.00722457	0.0363722		0.872853	6.26763	5.95423	-5.08138		1.85531	77.6866	2.03843	-0.183122		0	0	0.0673861	-0.0673861		2.06		0.001842	0.00177402	0.00170856	0.00188137	0.00181195	0.00174508	0.00168069	0.00161867	0.0017978	0.00173146	0.00166756	0.00160603	0.00154676
	coef1	1.25634				2.08	1215.68	#REF!	6.82448	6.5	0	0	0.208638	1.65355	2.1232	2.72625	0.00826776	0.04464		0.993085	6.1474	6.40851	-5.41542		2.1232	77.4187	2.25925	-0.136046		0	0	0.0445035	-0.0445035		2.08		0.00199557	0.00192193	0.001851	0.00201955	0.00194502	0.00187325	0.00180412	0.00173755	0.00191329	0.00184269	0.00177469	0.0017092	0.00164613
	coef2	0.000864628				2.1	1253.77	#REF!	6.8901	6.5	0	0	0.208638	1.86219	2.3911	3.07023	0.00931096	0.053951		1.11603	6.02446	6.88758	-5.77156		2.3911	77.1508	2.49643	-0.105326		0	0	0.0258177	-0.0258177		2.1		0.00214962	0.0020703	0.0019939	0.00215453	0.00207503	0.00199845	0.00192471	0.00185368	0.00202247	0.00194784	0.00187596	0.00180673	0.00174006
	coef3	-1.85164e-07				2.12	1292.37	#REF!	6.95572	6.5	0	0	0.208638	2.07083	2.659	3.41422	0.0103541	0.0643051		1.24075	5.89974	7.39233	-6.15159		2.659	76.8829	2.75069	-0.0916892		0	0	0.0118277	-0.0118277		2.12		0.00230649	0.00222138	0.0021394	0.00228886	0.0022044	0.00212305	0.00204471	0.00196926	0.0021279	0.00204938	0.00197375	0.00190092	0.00183077
	coef4	2.57172e-11				2.14	1331.46	#REF!	7.02134	7	0	0	0.11888	2.18971	2.81164	3.61022	0.0109485	0.0752536		1.36581	5.77467	7.92364	-6.55782		2.81164	76.7302	3.02277	-0.211128		0	0	0.00304638	-0.00304638		2.14		0.00245438	0.00236381	0.00227658	0.00241127	0.00232229	0.00223659	0.00215406	0.00207457	0.0022195	0.00213759	0.00205871	0.00198274	0.00190958
	q	1.63405e+07				2.16	1371.06	#REF!	7.08696	7	0	0	0.11888	2.30859	2.96429	3.80622	0.0115429	0.0867966		1.49036	5.65012	8.48238	-6.99202		2.96429	76.5776	3.31343	-0.349144		0	0	0	0		2.16		0.00260371	0.00250762	0.00241509	0.00252888	0.00243556	0.00234568	0.00225912	0.00217576	0.00230448	0.00221944	0.00213754	0.00205866	0.00198269
	Growth Rate	0.005	%/year			2.18	1411.15	#REF!	7.15258	7	0	0	0.11888	2.42747	3.11693	4.00222	0.0121373	0.0989339		1.61386	5.52662	9.06948	-7.45561		3.11693	76.425	3.62343	-0.506501		0	0	0.00322872	-0.00322872		2.18		0.00271772	0.00261743	0.00252085	0.00265122	0.00255339	0.00245916	0.00236841	0.00228102	0.00238849	0.00230035	0.00221546	0.00213371	0.00205497
	discount rate	0.0426	%/year			2.2	1451.75	#REF!	7.2182	7	0	0	0.11888	2.54635	3.26958	4.19822	0.0127317	0.111666		1.73593	5.40455	9.68582	-7.94989		3.26958	76.2723	3.95355	-0.683973		0	0	0.0132865	-0.0132865		2.2		0.00279863	0.00269536	0.0025959	0.00274026	0.00263914	0.00254175	0.00244795	0.00235762	0.00247955	0.00238805	0.00229993	0.00221506	0.00213332
	useful_life	30	years			2.22	1492.85	#REF!	7.28382	7	0	0	0.11888	2.66523	3.42222	4.39422	0.0133261	0.124992		1.85627	5.28421	10.3323	-8.47605		3.42222	76.1197	4.30457	-0.882345		0	0	0.0307408	-0.0307408		2.22		0.00284924	0.00274409	0.00264283	0.00279846	0.0026952	0.00259574	0.00249995	0.0024077	0.00254159	0.0024478	0.00235747	0.00227048	0.00218669
	CapEx	0.005				2.24	1534.44	#REF!	7.34944	7	0	0	0.11888	2.78411	3.57487	4.59022	0.0139205	0.138912		1.97461	5.16588	11.0099	-9.03529		3.57487	75.967	4.67728	-1.10241		0	0	0.0561729	-0.0561729		2.24		0.00287267	0.00276666	0.00266456	0.00282878	0.00272439	0.00262386	0.00252703	0.00243378	0.0025771	0.002482	0.00239041	0.0023022	0.00221725
	Difference	0.02	meter			2.26	1576.53	#REF!	7.41506	7	0	0	0.11888	2.90299	3.72751	4.78622	0.0145149	0.153427		2.09074	5.04974	11.7194	-9.6287		3.72751	75.8144	5.07247	-1.34496		0	0	0.0901773	-0.0901773		2.26		0.00287219	0.0027662	0.00266412	0.00283438	0.00272979	0.00262905	0.00253204	0.0024386	0.00258889	0.00249336	0.00240135	0.00231273	0.00222739
	Minimum height where buildings locate	6	ft			2.28	1619.09	#REF!	7.48068	7	0	0	0.11888	3.02187	3.88016	4.98222	0.0151093	0.168537		2.2045	4.93599	12.4619	-10.2574		3.88016	75.6617	5.49096	-1.6108		0	0	0.133361	-0.133361		2.28		0.00285106	0.00274585	0.00264452	0.00281849	0.00271448	0.00261431	0.00251784	0.00242493	0.0025799	0.0024847	0.00239301	0.0023047	0.00221965
	A factor to account for other damages than buildings	2				2.3	1662.12	#REF!	7.5463	7.5	0	0	0.68558	3.70745	4.76046	6.11255	0.0185372	0.187074		2.31748	4.82301	13.238	-10.9206		4.76046	74.7814	5.93354	-1.17308		0	0	0.186344	-0.186344		2.3		0.00285565	0.00275027	0.00264878	0.00282707	0.00272275	0.00262227	0.0025255	0.00243231	0.00259232	0.00249665	0.00240452	0.00231579	0.00223033
	Ratio of houses w/ basements	1	(1=All have basements; 0=No basements)			2.32	1705.62	#REF!	7.61192	7.5	0	0	0.68558	4.39303	5.64076	7.24288	0.0219651	0.209039		2.43074	4.70974	14.0489	-11.6181		5.64076	73.9011	6.40101	-0.760247		0	0	0.249757	-0.249757		2.32		0.00287607	0.00276994	0.00266772	0.00285056	0.00274537	0.00264406	0.00254649	0.00245252	0.0026176	0.00252101	0.00242798	0.00233838	0.00225209
	Average height of the first floor	0.9	meter			2.34	1749.56	#REF!	7.67754	7.5	0	0	0.68558	5.07861	6.52106	8.37321	0.025393	0.234432		2.54499	4.5955	14.8952	-12.3502		6.52106	73.0208	6.89417	-0.373107		0	0	0.324243	-0.324243		2.34		0.00290456	0.00279737	0.00269414	0.00288138	0.00277505	0.00267265	0.00257402	0.00247904	0.00264894	0.00255119	0.00245705	0.00236638	0.00227905
	Coastal length 12ft	2833.89				2.36	1793.94	#REF!	7.74316	7.5	0	0	0.68558	5.76419	7.40137	9.50354	0.0288209	0.263253		2.66058	4.4799	15.7778	-13.1172		7.40137	72.1405	7.41381	-0.0124481		0	0	0.410453	-0.410453		2.36		0.00293513	0.00282682	0.00272251	0.00291372	0.0028062	0.00270264	0.00260291	0.00250686	0.00268108	0.00258214	0.00248686	0.00239509	0.0023067
	OUTPUTS	2030	20800	2130		2.38	1838.73	#REF!	7.80878	7.5	0	0	0.68558	6.44977	8.28167	10.6339	0.0322488	0.295502		2.77768	4.36281	16.6976	-13.92		8.28167	71.2602	7.96072	0.320947		0	0	0.509049	-0.509049		2.38		0.00296339	0.00285403	0.00274871	0.00294324	0.00283463	0.00273003	0.00262929	0.00253226	0.00271011	0.0026101	0.00251379	0.00242102	0.00233168
	Optimal Level of Flood Defense	No_Wall	3.08	4.02		2.4	1883.91	#REF!	7.8744	7.5	0	0	0.68558	7.13535	9.16197	11.7642	0.0356767	0.331179		2.89623	4.24426	17.6554	-14.7591		9.16197	70.3799	8.53566	0.626312		0	0	0.620697	-0.620697		2.4		0.00298617	0.00287598	0.00276985	0.00296689	0.00285741	0.00275197	0.00265041	0.00255261	0.00273326	0.0026324	0.00253526	0.0024417	0.0023516
	Maximum height of Walls					2.42	1929.47	#REF!	7.94002	7.5	0	0	0.68558	7.82093	10.0423	12.8945	0.0391046	0.370283		3.016	4.12449	18.6518	-15.6358		10.0423	69.4996	9.13938	0.902892		0	0	0.746072	-0.746072		1.2		0.00300138	0.00289063	0.00278396	0.00298262	0.00287256	0.00276655	0.00266446	0.00256614	0.00274869	0.00264726	0.00254957	0.00245549	0.00236488
	Average height of Walls	#VALUE!	1.57	1.86		2.44	1975.37	#REF!	8.00564	8	0	0	1.58035	9.40128	12.0715	15.5001	0.0470064	0.41729		3.13797	4.00251	19.6876	-16.5496		12.0715	67.4704	9.77262	2.29886		0	0	0.885852	-0.885852		1.22		0.00304034	0.00292815	0.0028201	0.0030216	0.0029101	0.00280271	0.00269928	0.00259967	0.00278519	0.00268241	0.00258342	0.00248809	0.00239627
	Average Elevation of wall	1.12	1.51	2.16		2.46	2021.6	#REF!	8.07126	8	0	0	1.58035	10.9816	14.1007	18.1056	0.0549081	0.472198		3.26268	3.87781	20.7635	-17.5008		14.1007	65.4412	10.4361	3.6646		0	221.971	1.04072	-1.04072		1.24		0.00309253	0.00297841	0.0028685	0.00307341	0.00296	0.00285077	0.00274557	0.00264425	0.00283319	0.00272864	0.00262795	0.00253097	0.00243757
	Wall Length	No_Wall	2553.89	3023.89		2.48	2068.11	#REF!	8.13688	8	0	0	1.58035	12.562	16.1299	20.7112	0.0628098	0.535008		3.39023	3.75026	21.88	-18.4898		16.1299	63.412	11.1305	4.99943		0	221.971	1.21135	-1.21135		1.26		0.00314992	0.00303369	0.00292174	0.00313012	0.00301461	0.00290337	0.00279623	0.00269304	0.00288542	0.00277894	0.0026764	0.00257763	0.00248251
	Cost of Wall	No_Wall	36.0079	59.8395		2.5	2114.88	#REF!	8.2025	8	0	0	1.58035	14.1423	18.1591	23.3167	0.0707116	0.605719		3.52047	3.62002	23.0378	-19.5173		18.1591	61.3828	11.8564	6.30269		0	221.971	1.39843	-1.39843		1.28		0.00320657	0.00308824	0.00297428	0.00318583	0.00306827	0.00295505	0.002846	0.00274098	0.00293647	0.00282811	0.00272374	0.00262323	0.00252643
	Expected Benefit	No_Wall	62.4711	178.537		2.52	2161.88	#REF!	8.26812	8	0	0	1.58035	15.7227	20.1883	25.9223	0.0786133	0.684332		3.65307	3.48741	24.2373	-20.5842		20.1883	59.3536	12.6145	7.57376		0	221.971	1.60263	-1.60263		1.3		0.00325817	0.00313794	0.00302214	0.0032363	0.00311687	0.00300185	0.00289108	0.00278439	0.00298244	0.00287238	0.00276639	0.0026643	0.00256598
	Net Benefit	#VALUE!	26.4632	118.697		2.54	2209.08	#REF!	8.33374	8	0	0	1.58035	17.303	22.2175	28.5278	0.086515	0.770848		3.78761	3.35288	25.4791	-21.6915		22.2175	57.3244	13.4054	8.81205		0	221.971	1.82463	-1.82463		1.32		0.00330176	0.00317992	0.00306257	0.00327859	0.0031576	0.00304108	0.00292886	0.00282078	0.00302066	0.0029092	0.00280184	0.00269845	0.00259887
	Residual Damage	7.14049	17.0708	42.9741		2.56	2256.42	#REF!	8.39936	8	0	0	1.58035	18.8834	24.2467	31.1334	0.0944168	0.865264		3.92357	3.21692	26.7634	-22.8399		24.2467	55.2952	14.2297	10.017		0	221.971	2.06508	-2.06508		1.34		0.00333541	0.00321232	0.00309378	0.00331083	0.00318866	0.00307099	0.00295766	0.00284852	0.00304944	0.00293691	0.00282853	0.00272415	0.00262363
	Expected Damage	7.14049	79.5419	221.511		2.58	2303.89	#REF!	8.46498	8	0	0	1.58035	20.4637	26.2759	33.7389	0.102318	0.967583		4.06042	3.08006	28.0908	-24.0303		26.2759	53.266	15.0878	11.1881		0	221.971	2.32464	-2.32464		1.36		0.00335802	0.0032341	0.00311476	0.00333196	0.00320901	0.00309059	0.00297654	0.0028667	0.00306781	0.00295461	0.00284558	0.00274057	0.00263944
						2.6	2313.89	#REF!	8.5306	8.5	0	0	0.944124	21.4078	27.4882	35.2955	0.107039	1.07462		4.18353	2.95696	28.9909	-24.8074		27.4882	52.0537	15.725	11.7631		13.5814	208.389	2.56238	11.019		#REF!		0.00302703	0.00291532	0.00280774	0.00300085	0.00289012	0.00278347	0.00268075	0.00258183	0.00276067	0.0026588	0.00256069	0.00246619	0.00237518
	Surge height (ft)	Area submerged (sq m)	delta Area (sq m)	Building numbers	Building Values (million $)	2.62	2323.89	#REF!	8.59622	8.5	0	0	0.944124	22.3519	28.7005	36.8521	0.11176	1.18638		4.18274	2.95774	29.9085	-25.7257		28.7005	50.8414	16.3779	12.3226		19.6666	202.304	2.81273	16.8539		#REF!		0.00301286	0.00290168	0.0027946	0.00298536	0.00287519	0.00276909	0.00266691	0.00256849	0.00274515	0.00264385	0.00254629	0.00245232	0.00236183
	3	1963.9	0	0	0	2.64	2333.89	#REF!	8.66184	8.5	0	0	0.944124	23.2961	29.9127	38.4087	0.11648	1.30286		4.30366	2.83682	30.8435	-26.5398		29.9127	49.6291	17.0464	12.8663		29.9127	192.058	3.07581	26.8369		#REF!		0.00298448	0.00287434	0.00276828	0.00295573	0.00284666	0.00274161	0.00264044	0.002543	0.00271658	0.00261634	0.00251979	0.0024268	0.00233725
0.9144	3.5	7201.1	5237.2		0	2.66	2343.89	#REF!	8.72746	8.5	0	0	0.944124	24.2402	31.125	39.9653	0.121201	1.42406		4.42266	2.71783	31.7962	-27.3735		31.125	48.4169	17.7308	13.3942		31.125	190.846	3.35176	27.7733		#REF!		0.00294404	0.0028354	0.00273076	0.00291414	0.0028066	0.00270304	0.00260329	0.00250722	0.002677	0.00257821	0.00248307	0.00239144	0.00230319
1.0668	4	9174.9	1973.8		0	2.68	2353.89	#REF!	8.79308	8.5	0	0	0.944124	25.1843	32.3373	41.5219	0.125922	1.54998		4.53931	2.60118	32.7666	-28.2273		32.3373	47.2046	18.4312	13.9061		32.3373	189.634	3.64073	28.6966		#REF!		0.00289348	0.00278671	0.00268387	0.00286255	0.00275692	0.00265518	0.0025572	0.00246283	0.00262822	0.00253123	0.00243783	0.00234786	0.00226122
1.2192	4.5	9829.5	654.6			2.7	2363.89	#REF!	8.8587	8.5	0	0	0.944124	26.1284	33.5496	43.0785	0.130642	1.68063		4.65325	2.48723	33.755	-29.1017		33.5496	45.9923	19.1477	14.4018		33.5496	188.421	3.94286	29.6067		#REF!		0.00283455	0.00272995	0.00262921	0.0028027	0.00269927	0.00259966	0.00250373	0.00241134	0.00257187	0.00247697	0.00238556	0.00229753	0.00221275
1.3716	5	11138.8	1309.3			2.72	2373.89	#REF!	8.92432	8.5	0	0	0.944124	27.0726	34.7619	44.6351	0.135363	1.81599		4.76422	2.37627	34.7614	-29.9971		34.7619	44.78	19.8805	14.8814		34.7619	187.209	4.25827	30.5036		#REF!		0.0027688	0.00266663	0.00256822	0.00273614	0.00263517	0.00253793	0.00244427	0.00235408	0.00250941	0.0024168	0.00232762	0.00224173	0.002159
1.524	5.5	14389.7	3250.9			2.74	2383.89	#REF!	8.98994	8.5	0	0	0.944124	28.0167	35.9741	46.1917	0.140083	1.95607		4.87198	2.2685	35.7859	-30.914		35.9741	43.5677	20.6297	15.3445		35.9741	185.997	4.5871	31.387		#REF!		0.00269759	0.00259805	0.00250218	0.00266425	0.00256593	0.00247125	0.00238005	0.00229222	0.0024421	0.00235198	0.00226518	0.0021816	0.00210109
1.6764	6	17964.3	3574.6	4.55323	0.61036	2.76	2393.89	#REF!	9.05556	9	0	0	1.42485	29.4415	37.8037	48.5409	0.147208	2.10328		4.97651	2.16398	36.8288	-31.8523		37.8037	41.7382	21.3954	16.4083		37.8037	184.167	4.9295	32.8742		#REF!		0.00262514	0.00252827	0.00243497	0.0025912	0.00249558	0.00240349	0.00231479	0.00222937	0.00237378	0.00228618	0.00220181	0.00212056	0.00204231
1.8288	6.5	26517.6	8553.3	10.895	1.46047	2.78	2403.89	#REF!	9.12118	9	0	0	1.42485	30.8664	39.6332	50.8901	0.154332	2.25761		5.07775	2.06273	37.8902	-32.8124		39.6332	39.9087	22.1778	17.4554		39.6332	182.338	5.2856	34.3476		#REF!		0.00255166	0.0024575	0.00236681	0.0025172	0.00242431	0.00233484	0.00224868	0.0021657	0.00230465	0.00221961	0.0021377	0.00205881	0.00198284
1.9812	7	32087.4	5569.8	7.09466	0.951039	2.8	2413.89	#REF!	9.1868	9	0	0	1.42485	32.2912	41.4628	53.2393	0.161456	2.41907		5.17571	1.96478	38.9702	-33.7944		41.4628	38.0791	22.977	18.4858		41.4628	180.508	5.65553	35.8072		#REF!		0.00247738	0.00238596	0.00229792	0.00244249	0.00235236	0.00226555	0.00218195	0.00210143	0.00223495	0.00215248	0.00207305	0.00199655	0.00192287
2.1336	7.5	60193.3	28105.9	35.8005	4.79906	2.82	2423.89	#REF!	9.25242	9	0	0	1.42485	33.7161	43.2923	55.5884	0.16858	2.58765		5.27037	1.87012	40.0689	-34.7985		43.2923	36.2496	23.7931	19.4992		43.2923	178.678	6.03944	37.2529		#REF!		0.00240257	0.00231391	0.00222853	0.00236735	0.00227999	0.00219585	0.00211482	0.00203678	0.00216492	0.00208503	0.00200809	0.00193399	0.00186262
2.286	8	134236	74042.9	94.3138	12.6428	2.84	2433.89	#REF!	9.31804	9	0	0	1.42485	35.1409	45.1219	57.9376	0.175705	2.76335		5.36174	1.77875	41.1864	-35.8247		45.1219	34.42	24.6264	20.4955		45.1219	176.849	6.43747	38.6844		#REF!		0.0023275	0.00224161	0.00215889	0.00229203	0.00220745	0.00212599	0.00204753	0.00197198	0.00209481	0.00201751	0.00194306	0.00187136	0.0018023
2.4384	8.5	178471	44234.4	56.3446	7.55299	2.86	2443.89	#REF!	9.38366	9	0	0	1.42485	36.5658	46.9514	60.2868	0.182829	2.94618		5.44983	1.69066	42.323	-36.8732		46.9514	32.5905	25.4768	21.4746		46.9514	175.019	6.84974	40.1017		#REF!		0.00225243	0.00216931	0.00208926	0.00221679	0.00213499	0.0020562	0.00198032	0.00190725	0.00202486	0.00195014	0.00187818	0.00180887	0.00174212
2.5908	9	236884	58412.9	74.4048	9.97396	2.88	2453.89	#REF!	9.44928	9	0	0	1.42485	37.9906	48.781	62.636	0.189953	3.13614		5.53468	1.6058	43.4787	-37.944		48.781	30.7609	26.3446	22.4363		48.781	173.19	7.27639	41.5046		#REF!		0.0021776	0.00209725	0.00201985	0.00214189	0.00206285	0.00198673	0.00191341	0.00184281	0.0019553	0.00188314	0.00181365	0.00174672	0.00168227
2.7432	9.5	348283	111400	141.898	19.0214	2.9	2463.89	#REF!	9.5149	9.5	0	0	2.37768	40.3683	51.834	66.5561	0.201842	3.33798		5.61645	1.52404	44.6537	-39.0373		50.5048	29.0371	27.23	23.2748		51.834	170.137	7.71758	44.1164		#REF!		0.00210627	0.00202855	0.00195369	0.00207052	0.00199411	0.00192052	0.00184965	0.0017814	0.00188903	0.00181932	0.00175218	0.00168753	0.00162525
2.8956	10	430891	82608.2	105.224	14.1053	2.92	2473.89	#REF!	9.58052	9.5	0	0	2.37768	42.746	54.8869	70.4762	0.21373	3.55171		5.69527	1.44522	45.8481	-40.1529		52.1272	27.4147	28.1329	23.9942		54.8869	167.084	8.17342	46.7135		#REF!		0.00203783	0.00196263	0.00189021	0.00200207	0.00192819	0.00185704	0.00178851	0.00172251	0.00182551	0.00175815	0.00169327	0.00163079	0.00157061
3.048	10.5	528522	97630.1	124.359	16.6703	2.94	2483.89	#REF!	9.64614	9.5	0	0	2.37768	45.1237	57.9399	74.3964	0.225618	3.77733		5.77125	1.36924	47.0621	-41.2909		53.6592	25.8827	29.0536	24.6056		57.9399	164.031	8.64406	49.2959		#REF!		0.00197183	0.00189906	0.00182899	0.0019361	0.00186465	0.00179584	0.00172957	0.00166575	0.00176433	0.00169922	0.00163652	0.00157613	0.00151797
3.2004	11	619841	91319.7	116.321	15.5928	2.96	2493.89	#REF!	9.71176	9.5	0	0	2.37768	47.5014	60.9929	78.3165	0.237507	4.01483		5.84449	1.296	48.2958	-42.4513		55.1103	24.4316	29.9923	25.118		60.9929	160.978	9.12963	51.8633		#REF!		0.0019079	0.0018375	0.00176969	0.00187225	0.00180316	0.00173662	0.00167254	0.00161082	0.00170515	0.00164223	0.00158163	0.00152326	0.00146705
3.3528	11.5	682933	63091.8	80.3646	10.7729	2.98	2503.89	#REF!	9.77738	9.5	0	0	2.37768	49.879	64.0459	82.2366	0.249395	4.26423		5.91508	1.22541	49.5493	-43.6342		56.4882	23.0536	30.949	25.5393		64.0459	157.925	9.63028	54.4157		#REF!		0.00184579	0.00177768	0.00171208	0.00181026	0.00174346	0.00167912	0.00161716	0.00155748	0.00164774	0.00158694	0.00152838	0.00147198	0.00141766
3.5052	12	750146	67213	85.6141	11.4766	3	2513.89	#REF!	9.843	9.5	0	0	2.37768	52.2567	67.0989	86.1567	0.261284	4.52551		5.98311	1.15738	50.8227	-44.8396		57.7999	21.742	31.9238	25.8761		67.0989	154.872	10.1461	56.9528		#REF!		0.0017853	0.00171942	0.00165597	0.00174994	0.00168536	0.00162317	0.00156327	0.00150558	0.00159192	0.00153317	0.0014766	0.00142211	0.00136963
3.6576	12.5	795696	45550.5	58.021	7.77771	3.02	2523.89	#REF!	9.90862	9.5	0	0	2.37768	54.6344	70.1519	90.0769	0.273172	4.79868		6.04864	1.09184	52.1163	-46.0677		59.0504	20.4915	32.917	26.1334		70.1519	151.819	10.6773	59.4746		#REF!		0.00172629	0.00166259	0.00160124	0.00169113	0.00162873	0.00156862	0.00151074	0.00145499	0.00153755	0.00148081	0.00142617	0.00137354	0.00132285
3.81	13	872729	77032.5	98.1219	13.1532	3.04	2533.89	#REF!	9.97424	9.5	0	0	2.37768	57.0121	73.2049	93.997	0.28506	5.08374		6.11176	1.02873	53.4301	-47.3184		60.2439	19.298	33.9287	26.3153		73.2049	148.766	11.224	61.9809		#REF!		0.00166866	0.00160708	0.00154778	0.00163376	0.00157347	0.0015154	0.00145948	0.00140563	0.00148454	0.00142976	0.001377	0.00132618	0.00127725
3.9624	13.5	938410	65680.7	83.6623	11.2149	3.06	2543.89	#REF!	10.0399	10	0	0	1.76316	58.7752	75.4689	96.904	0.293876	5.37762		6.17249	0.967998	54.7643	-48.5919		61.3833	18.1586	34.9589	26.4244		75.4689	146.502	11.7864	63.6825		#REF!		0.00161142	0.00155196	0.00149469	0.00157683	0.00151865	0.0014626	0.00140863	0.00135665	0.00143201	0.00137917	0.00132827	0.00127926	0.00123205
4.1148	14	1.00452e+06	66105.8	84.2038	11.2875	3.08	2553.89	#REF!	10.1055	10	0	0	1.76316	60.5384	77.7328	99.8109	0.302692	5.68031		6.23087	0.909615	56.1191	-49.8882		62.4711	17.0708	36.0079	26.4632		77.7328	144.238	12.3644	65.3684		#REF!		0.00155477	0.00149739	0.00144214	0.00152056	0.00146444	0.0014104	0.00135836	0.00130823	0.00138013	0.0013292	0.00128015	0.00123291	0.00118742
4.2672	14.5	1.06713e+06	62613.2	79.755	10.6912	3.1	2563.89	#REF!	10.1711	10	0	0	1.76316	62.3015	79.9968	102.718	0.311508	5.99182		6.28696	0.853532	57.4944	-51.2075		63.5086	16.0333	37.0757	26.4329		79.9968	141.974	12.9584	67.0384		#REF!		0.00149887	0.00144356	0.00139029	0.00146509	0.00141102	0.00135895	0.00130881	0.00126051	0.00132905	0.00128001	0.00123277	0.00118728	0.00114347
4.4196	15	1118003	50874.3	64.8023	8.68675	3.12	2573.89	#REF!	10.2367	10	0	0	1.76316	64.0647	82.2607	105.625	0.320324	6.31214		6.34079	0.799698	58.8906	-52.5498		64.497	15.0449	38.1626	26.3344		82.2607	139.71	13.5684	68.6923		#REF!		0.00144388	0.0013906	0.00133929	0.00141057	0.00135852	0.00130839	0.0012601	0.0012136	0.00127889	0.0012317	0.00118625	0.00114247	0.00110031
4.572	15.5	1.18409e+06	66083.1	84.1748	11.2836	3.14	2583.89	#REF!	10.3023	10	0	0	1.76316	65.8279	84.5246	108.532	0.329139	6.64128		6.39243	0.748058	60.3077	-53.9153		65.4372	14.1047	39.2686	26.1686		84.5246	137.446	14.1946	70.3301		#REF!		0.00138992	0.00133863	0.00128923	0.00135712	0.00130704	0.00125881	0.00121236	0.00116762	0.00122977	0.00118439	0.00114068	0.00109859	0.00105805
4.7244	16	1.2386e+06	54512.5	69.4365	9.30797	3.16	2593.89	#REF!	10.368	10	0	0	1.76316	67.591	86.7886	111.439	0.337955	6.97924		6.44193	0.698554	61.7459	-55.304		66.3296	13.2122	40.3939	25.9358		86.7886	135.182	14.8371	71.9515		#REF!		0.00133709	0.00128775	0.00124023	0.00130484	0.00125669	0.00121032	0.00116566	0.00112264	0.00118176	0.00113815	0.00109615	0.0010557	0.00101674
4.8768	16.5	1.31355e+06	74948	95.4667	12.7973	3.18	2603.89	#REF!	10.4336	10	0	0	1.76316	69.3542	89.0525	114.346	0.346771	7.32601		6.48936	0.651124	63.2053	-56.7159		67.1753	12.3666	41.5386	25.6367		89.0525	132.918	15.496	73.5566		#REF!		0.00128548	0.00123804	0.00119236	0.00125381	0.00120754	0.00116298	0.00112007	0.00107874	0.00113493	0.00109305	0.00105272	0.00101387	0.000976456
5.0292	17	1.38322e+06	69675.8	88.7511	11.8971	3.2	2613.89	#REF!	10.4992	10	0	0	1.76316	71.1173	91.3165	117.253	0.355587	7.6816		6.53478	0.605707	64.686	-58.1512		67.9754	11.5665	42.7028	25.2726		91.3165	130.654	16.1715	75.145		#REF!		0.00123515	0.00118958	0.00114568	0.0012041	0.00115966	0.00111687	0.00107565	0.00103596	0.00108935	0.00104916	0.00101044	0.000973153	0.000937242
5.1816	17.5	1.49072e+06	107497	136.927	18.3551	3.22	2623.89	#REF!	10.5648	10.5	0	0	2.38147	73.4988	94.3743	121.179	0.367494	8.04909		6.57827	0.562221	66.1882	-59.6099		68.7317	10.8102	43.8868	24.8449		94.3743	127.596	16.8637	77.5106		#REF!		0.00118662	0.00114284	0.00110066	0.00115619	0.00111352	0.00107243	0.00103286	0.000994742	0.00104546	0.00100688	0.000969729	0.000933944	0.000899479
5.334	18	1.56918e+06	78461.9	99.9426	13.3973	3.24	2633.89	#REF!	10.6304	10.5	0	0	2.38147	75.8803	97.4322	125.105	0.379401	8.42849		6.6199	0.520589	67.712	-61.0921		69.4459	10.096	45.0906	24.3553		97.4322	124.539	17.5728	79.8594		#REF!		0.00113982	0.00109776	0.00105725	0.00111001	0.00106905	0.0010296	0.000991607	0.000955015	0.00100319	0.000966172	0.000930518	0.000896181	0.00086311
5.4864						3.26	2643.89	#REF!	10.6961	10.5	0	0	2.38147	78.2617	100.49	129.032	0.391309	8.8198		6.65975	0.480738	69.2575	-62.5978		70.1199	9.42202	46.3144	23.8055		100.49	121.481	18.2989	82.1912		#REF!		0.00109467	0.00105428	0.00101537	0.00106551	0.00102619	0.00098832	0.000951849	0.000916724	0.000962475	0.000926958	0.000892752	0.000859807	0.000828079
						3.28	2653.89	#REF!	10.7617	10.5	0	0	2.38147	80.6432	103.548	132.958	0.403216	9.22302		6.69789	0.442597	70.825	-64.1271		70.7555	8.78641	47.5582	23.1973		103.548	118.423	19.0421	84.5058		#REF!		0.00105113	0.00101234	0.000974987	0.00102261	0.000984876	0.000948532	0.000913529	0.000879818	0.000923259	0.000889189	0.000856376	0.000824774	0.000794338
		2030	2080	2130		3.3	2663.89	#REF!	10.8273	10.5	0	0	2.38147	83.0247	106.606	136.885	0.415123	9.63814		6.73439	0.406097	72.4145	-65.6801		71.3546	8.18732	48.8223	22.5322		106.606	115.365	19.8026	86.8032		#REF!		0.00100914	0.000971903	0.000936038	0.000981272	0.000945061	0.000910187	0.000876599	0.000844251	0.00088549	0.000852814	0.000821343	0.000791034	0.000761844
	12 ft wall	4.78	5.17	5.82		3.32	2673.89	#REF!	10.8929	10.5	0	0	2.38147	85.4061	109.664	140.811	0.427031	10.0652		6.76931	0.371173	74.0261	-67.2568		71.919	7.62292	50.1068	21.8121		109.664	112.307	20.5805	89.0832		#REF!		0.000968654	0.000932908	0.000898482	0.000941438	0.000906697	0.000873238	0.000841014	0.000809979	0.000849122	0.000817788	0.00078761	0.000758545	0.000730554
	Length	5576.89	5882.48	6321.98		3.34	2683.89	#REF!	10.9585	10.5	0	0	2.38147	87.7876	112.722	144.737	0.438938	10.5041		6.80273	0.337762	75.6601	-68.8574		72.4505	7.09142	51.4118	21.0386		112.722	109.249	21.3759	91.3456		#REF!		0.000929622	0.000895317	0.000862278	0.000903063	0.000869738	0.000837643	0.000806733	0.000776963	0.000814109	0.000784067	0.000755133	0.000727267	0.00070043
	Cost	442.856	467.123	502.023		3.36	2693.89	#REF!	11.0242	11	0	0	1.9491	89.7367	115.224	147.951	0.448684	10.9528		6.83468	0.305808	77.3165	-70.4818		72.9507	6.59116	52.7375	20.2132		115.224	106.747	22.189	93.0352		#REF!		0.000891828	0.000858918	0.000827223	0.000865932	0.000833977	0.000803202	0.000773562	0.000745016	0.000780255	0.000751462	0.000723731	0.000697024	0.000671303
						3.38	2703.89	#REF!	11.0898	11	0	0	1.9491	91.6858	117.727	151.164	0.458429	11.4112		6.86523	0.275258	78.9954	-72.1302		73.4213	6.12053	54.0839	19.3374		117.727	104.244	23.02	94.7069		#REF!		0.000855273	0.000823712	0.000793316	0.000830042	0.000799412	0.000769912	0.000741501	0.000714138	0.000747556	0.000719969	0.000693401	0.000667813	0.00064317
						3.4	2713.89	#REF!	11.1554	11	0	0	1.9491	93.6349	120.23	154.378	0.468174	11.8794		6.89443	0.246059	80.6971	-73.8027		73.8639	5.67795	55.4513	18.4126		120.23	101.741	23.8689	96.3607		#REF!		0.000819953	0.000789695	0.000760553	0.000795388	0.000766036	0.000737768	0.000710543	0.000684323	0.000716003	0.000689581	0.000664135	0.000639627	0.000616023
						3.42	2723.89	#REF!	11.221	11	0	0	1.9491	95.584	122.732	157.591	0.47792	12.3573		6.92233	0.218157	82.4217	-75.4993		74.28	5.26187	56.8398	17.4402		122.732	99.2385	24.7358	97.9964		#REF!		0.000785856	0.000756856	0.000728927	0.000761956	0.000733839	0.000706759	0.000680678	0.00065556	0.000685585	0.000660286	0.00063592	0.000612453	0.000589852
						3.44	2733.89	#REF!	11.2866	11	0	0	1.9491	97.5331	125.235	160.805	0.487665	12.845		6.94899	0.191502	84.1692	-77.2202		74.6711	4.87082	58.2494	16.4216		125.235	96.7358	25.6211	99.6139		#REF!		0.000752969	0.000725183	0.000698423	0.000729733	0.000702804	0.000676869	0.000651891	0.000627835	0.000656284	0.000632066	0.000608742	0.000586278	0.000564643
						3.46	2743.89	#REF!	11.3523	11	0	0	1.9491	99.4822	127.738	164.018	0.497411	13.3424		6.97444	0.166044	85.9398	-78.9654		75.0385	4.50337	59.6804	15.3581		127.738	94.2332	26.5246	101.213		#REF!		0.000721275	0.000694659	0.000669025	0.000698697	0.000672914	0.000648082	0.000624167	0.000601134	0.000628082	0.000604905	0.000582583	0.000561084	0.000540379
						3.48	2753.89	#REF!	11.4179	11	0	0	1.9491	101.431	130.24	167.232	0.507156	13.8495		6.99875	0.141733	87.7338	-80.735		75.3837	4.15815	61.1329	14.2508		130.24	91.7305	27.4467	102.794		#REF!		0.000690754	0.000665264	0.000640714	0.000668828	0.000644147	0.000620377	0.000597484	0.000575436	0.000600957	0.000578781	0.000557423	0.000536853	0.000517042
						3.5	2763.89	#REF!	11.4835	11	0	0	1.9491	103.38	132.743	170.445	0.516902	14.3664		7.02197	0.118522	89.5511	-82.5291		75.708	3.83386	62.607	13.101		132.743	89.2278	28.3875	104.356		#REF!		0.000661381	0.000636975	0.000613469	0.000640101	0.00061648	0.000593731	0.000571821	0.00055072	0.000574885	0.000553671	0.000533239	0.000513562	0.00049461
						3.52	2773.89	#REF!	11.5491	11.5	0	0	1.53898	104.919	134.719	172.983	0.524597	14.891		7.04412	0.0963685	91.3919	-84.3478		76.0126	3.52929	64.1029	11.9097		134.719	87.2517	29.347	105.372		#REF!		0.000633045	0.000609685	0.000587186	0.000612406	0.000589807	0.000568042	0.00054708	0.000526892	0.000549765	0.000529478	0.000509939	0.000491121	0.000472998
						3.54	2783.89	#REF!	11.6147	11.5	0	0	1.53898	106.458	136.695	175.52	0.532292	15.4233		7.06526	0.0752292	93.2565	-86.1912		76.2986	3.24331	65.6206	10.678		136.695	85.2756	30.3254	106.37		#REF!		0.000605739	0.000583386	0.000561858	0.000585733	0.000564118	0.000543301	0.000523252	0.000503943	0.000525587	0.000506192	0.000487513	0.000469523	0.000452196
						3.56	2793.89	#REF!	11.6804	11.5	0	0	1.53898	107.997	138.671	178.057	0.539987	15.9633		7.08542	0.0550627	95.1448	-88.0594		76.5671	2.97482	67.1604	9.40668		138.671	83.2995	31.3229	107.348		#REF!		0.00057945	0.000558068	0.000537474	0.000560069	0.000539402	0.000519497	0.000500326	0.000481863	0.000502339	0.000483802	0.000465949	0.000448754	0.000432194
						3.58	2803.89	#REF!	11.746	11.5	0	0	1.53898	109.536	140.647	180.595	0.547682	16.511		7.10466	0.0358286	97.0571	-89.9524		76.8191	2.72276	68.7223	8.0968		140.647	81.3234	32.3395	108.308		#REF!		0.000554165	0.000533715	0.00051402	0.0005354	0.000515642	0.000496614	0.000478288	0.000460638	0.000480004	0.000462291	0.000445231	0.000428802	0.000412978
						3.6	2813.89	#REF!	11.8116	11.5	0	0	1.53898	111.075	142.623	183.132	0.555376	17.0664		7.123	0.0174872	98.9935	-91.8705		77.0557	2.48616	70.3066	6.74917		142.623	79.3473	33.3755	109.248		#REF!		0.000529863	0.00051031	0.000491479	0.000511703	0.000492821	0.000474635	0.00045712	0.000440251	0.000458563	0.000441641	0.000425343	0.000409647	0.000394531
						3.62	2823.89	#REF!	11.8772	11.5	0	0	1.53898	112.614	144.6	185.67	0.563071	17.6295		7.14049	0	100.954	-93.8136		77.2778	2.26407	71.9132	5.36458		144.6	77.3712	34.431	110.169		#REF!		0.000506524	0.000487833	0.000469831	0.000488959	0.000470916	0.000453538	0.000436801	0.000420683	0.000437994	0.000421831	0.000406265	0.000391273	0.000376834
						3.64	2833.89	#REF!	11.9428	11.5	0	0	1.53898	114.153	146.576	188.207	0.570766	18.2002							77.4863	2.05561	73.5425	3.94378		146.576	75.3951	35.5061	111.07		#REF!		0.000484126	0.00046626	0.000449055	0.000467143	0.000449904	0.000433302	0.000417312	0.000401913	0.000418276	0.000402841	0.000387975	0.000373658	0.000359869
						3.66	2843.89	#REF!	12.0085	12	0	0	1.43457	115.588	148.418	190.572	0.577939	18.7782							77.6819	1.85994	75.1945	2.48749		148.418	73.5531	36.6009	111.817		#REF!		0.000462629	0.000445558	0.000429116	0.000446217	0.000429751	0.000413892	0.000398619	0.000383909	0.000399373	0.000384635	0.000370442	0.000356772	0.000343606
						3.68	2853.89	#REF!	12.0741	12	0	0	1.43457	117.022	150.26	192.937	0.585112	19.3633							77.8656	1.67627	76.8693	0.996331		150.26	71.7111	37.7156	112.544		#REF!		0.000442013	0.000425702	0.000409992	0.000426158	0.000410432	0.000395286	0.000380699	0.000366651	0.000381263	0.000367193	0.000353643	0.000340593	0.000328025
						3.7	2863.89	#REF!	12.1397	12	0	0	1.43457	118.457	152.102	195.303	0.592285	19.9556							78.038	1.50387	78.5671	-0.529077		152.102	69.8691	38.8503	113.252		#REF!		0.000422251	0.000406669	0.000391662	0.000406941	0.000391924	0.000377461	0.000363532	0.000350117	0.000363922	0.000350493	0.000337559	0.000325102	0.000313105
						3.72	2873.89	#REF!	12.2053	12	0	0	1.43457	119.892	153.944	197.668	0.599458	20.555							78.1999	1.34202	80.288	-2.08817		153.944	68.027	40.0051	113.939		#REF!		0.000403319	0.000388436	0.000374102	0.000388541	0.000374203	0.000360394	0.000347095	0.000334286	0.000347327	0.00033451	0.000322166	0.000310277	0.000298827
						3.74	2883.89	#REF!	12.2709	12	0	0	1.43457	121.326	155.786	200.033	0.606631	21.1616							78.3518	1.19009	82.0322	-3.68044		155.786	66.185	41.1803	114.606		#REF!		0.000385191	0.000370977	0.000357287	0.00037093	0.000357242	0.000344059	0.000331363	0.000319135	0.000331452	0.000319221	0.000307441	0.000296096	0.000285169
						3.76	2893.89	#REF!	12.3366	12	0	0	1.43457	122.761	157.628	202.398	0.613803	21.7754							78.4944	1.04744	83.7998	-5.3054		157.628	64.343	42.3758	115.252		#REF!		0.000367841	0.000354267	0.000341193	0.000354083	0.000341017	0.000328433	0.000316313	0.000304641	0.000316273	0.000304602	0.000293362	0.000282536	0.00027211
						3.78	2903.89	#REF!	12.4022	12	0	0	1.43457	124.195	159.47	204.763	0.620976	22.3964							78.6284	0.913498	85.591	-6.96259		159.47	62.5009	43.592	115.878		#REF!		0.000351241	0.000338279	0.000325796	0.000337974	0.000325502	0.00031349	0.000301922	0.00029078	0.000301766	0.00029063	0.000279905	0.000269576	0.000259628
						3.8	2913.89	#REF!	12.4678	12	0	0	1.43457	125.63	161.312	207.129	0.628149	23.0246							78.7542	0.787714	87.4058	-8.65163		161.312	60.6589	44.8288	116.483		#REF!		0.000335365	0.000322989	0.000311071	0.000322574	0.00031067	0.000299206	0.000288165	0.000277531	0.000287904	0.00027728	0.000267048	0.000257193	0.000247703
						3.82	2923.89	#REF!	12.5334	12.5	0	0	0.972214	126.602	162.56	208.731	0.63301	23.6576							78.8723	0.669591	89.2444	-10.3721		162.56	59.4106	46.0865	116.474		#REF!		0.000320156	0.000308341	0.000296963	0.000307828	0.000296469	0.000285528	0.000274992	0.000264844	0.000274638	0.000264503	0.000254743	0.000245342	0.000236289
						3.84	2933.89	#REF!	12.599	12.5	0	0	0.972214	127.574	163.809	210.334	0.637871	24.2955							78.9832	0.558654	91.107	-12.1238		163.809	58.1622	47.3651	116.443		#REF!		0.000305593	0.000294316	0.000283455	0.000293716	0.000282877	0.000272439	0.000262385	0.000252703	0.000261948	0.000252282	0.000242972	0.000234006	0.000225371
						3.86	2943.89	#REF!	12.6647	12.5	0	0	0.972214	128.546	165.057	211.937	0.642732	24.9382							79.0874	0.454462	92.9937	-13.9063		165.057	56.9139	48.6649	116.392		#REF!		0.000291657	0.000280895	0.000270529	0.000280217	0.000269877	0.000259918	0.000250326	0.000241089	0.000249816	0.000240597	0.000231719	0.000223168	0.000214933
						3.88	2953.89	#REF!	12.7303	12.5	0	0	0.972214	129.519	166.305	213.54	0.647593	25.5858							79.1853	0.356595	94.9046	-15.7193		166.305	55.6655	49.9859	116.319		#REF!		0.000278327	0.000268056	0.000258165	0.000267312	0.000257448	0.000247947	0.000238797	0.000229985	0.000238222	0.000229431	0.000220965	0.000212811	0.000204957
						3.9	2963.89	#REF!	12.7959	12.5	0	0	0.972214	130.491	167.554	215.143	0.652454	26.2382							79.2772	0.264661	96.8398	-17.5626		167.554	54.4172	51.3283	116.225		#REF!		0.000265582	0.000255782	0.000246343	0.000254978	0.000245569	0.000236507	0.00022778	0.000219374	0.000227147	0.000218765	0.000210692	0.000202917	0.000195429
						3.92	2973.89	#REF!	12.8615	12.5	0	0	0.972214	131.463	168.802	216.746	0.657316	26.8955							79.3636	0.178292	98.7996	-19.436		168.802	53.1688	52.6922	116.11		#REF!		0.000253401	0.00024405	0.000235044	0.000243196	0.000234221	0.000225578	0.000217254	0.000209237	0.000216572	0.00020858	0.000200883	0.00019347	0.00018633
						3.94	2983.89	#REF!	12.9271	12.5	0	0	0.972214	132.435	170.05	218.349	0.662177	27.5577							79.4041	0.137761	100.784	-21.3799		170.05	51.9205	54.0778	115.973		#REF!		0.000241763	0.000232842	0.000224249	0.000231944	0.000223385	0.000215141	0.000207202	0.000199556	0.000206477	0.000198858	0.000191519	0.000184452	0.000177645
						3.96	2993.89	#REF!	12.9928	12.5	0	0	0.972214	133.408	171.299	219.952	0.667038	28.2248							79.442	0.0998394	102.793	-23.3511		171.299	50.6721	55.4852	115.813		#REF!		0.000230648	0.000222137	0.000213939	0.000221202	0.000213039	0.000205178	0.000197606	0.000190314	0.000196844	0.00018958	0.000182584	0.000175847	0.000169358
						3.98	3003.89	#REF!	13.0584	13	0	0	1.87903	135.287	173.711	223.05	0.676433	28.9012							79.4775	0.0643474	104.827	-25.3497		173.711	48.2594	56.9145	116.797		#REF!		0.000220069	0.000211948	0.000204127	0.000210983	0.000203197	0.000195699	0.000188477	0.000181522	0.000187684	0.000180758	0.000174088	0.000167663	0.000161476
						4	3013.89	#REF!	13.124	13	0	0	1.87903	137.166	176.124	226.148	0.685828	29.587							79.5108	0.031119	106.886	-27.3756		176.124	45.8467	58.3659	117.758		#REF!		0.000210001	0.000202251	0.000194788	0.00020126	0.000193833	0.00018668	0.000179791	0.000173157	0.000178972	0.000172367	0.000166007	0.000159881	0.000153981
						4.02	3023.89	#REF!	13.1896	13	0	0	1.87903	139.045	178.537	229.246	0.695223	30.2822							79.5419	0	108.971	-29.4288		178.537	43.434	59.8395	118.697		#REF!		0.000200416	0.00019302	0.000185897	0.000192008	0.000184922	0.000178098	0.000171526	0.000165197	0.000170685	0.000164387	0.000158321	0.000152478	0.000146851
						4.04	4863.35	#REF!	13.2552	13	0	0	1.87903	140.924	180.95	232.344	0.704618	30.9869												180.95	41.0212	98.3212	82.6283		#REF!		0.00019129	0.000184231	0.000177433	0.000183203	0.000176442	0.000169931	0.000163661	0.000157621	0.000162802	0.000156795	0.000151009	0.000145436	0.000140069
						4.06	4885.76	#REF!	13.3209	13	0	0	1.87903	142.803	183.362	235.442	0.714014	31.7009												183.362	38.6085	100.887	82.4754		#REF!		0.000182602	0.000175863	0.000169374	0.000174823	0.000168372	0.000162158	0.000156174	0.000150411	0.000155303	0.000149572	0.000144052	0.000138736	0.000133617
						4.08	4907.95	#REF!	13.3865	13	0	0	1.87903	144.682	185.775	238.54	0.723409	32.4243												185.775	36.1958	103.49	82.285		#REF!		0.000174328	0.000167895	0.000161699	0.000166846	0.000160689	0.000154759	0.000149048	0.000143548	0.000148167	0.000142699	0.000137433	0.000132361	0.000127477
						4.1	4929.93	#REF!	13.4521	13	0	0	1.87903	146.561	188.188	241.638	0.732804	33.1571												188.188	33.783	106.131	82.0572		#REF!		0.000166449	0.000160306	0.000154391	0.000159252	0.000153375	0.000147715	0.000142264	0.000137015	0.000141376	0.000136159	0.000131134	0.000126295	0.000121634
						4.12	4951.71	#REF!	13.5177	13.5	0	0	1.40187	147.963	189.988	243.949	0.739813	33.8969												189.988	31.983	108.809	81.1791		#REF!		0.000158932	0.000153068	0.000147419	0.000152011	0.000146402	0.000140999	0.000135796	0.000130785	0.000134903	0.000129925	0.00012513	0.000120513	0.000116066
						4.14	4973.29	#REF!	13.5833	13.5	0	0	1.40187	149.365	191.788	246.26	0.746823	34.6437												191.788	30.183	111.524	80.2634		#REF!		0.000151763	0.000146163	0.000140769	0.000145107	0.000139752	0.000134595	0.000129628	0.000124845	0.000128734	0.000123983	0.000119408	0.000115002	0.000110758
						4.16	4994.67	#REF!	13.649	13.5	0	0	1.40187	150.766	193.588	248.572	0.753832	35.3976												193.588	28.383	114.278	79.3098		#REF!		0.000144925	0.000139577	0.000134427	0.000138525	0.000133413	0.00012849	0.000123748	0.000119182	0.000122854	0.000118321	0.000113954	0.000109749	0.000105699
						4.18	5015.86	#REF!	13.7146	13.5	0	0	1.40187	152.168	195.388	250.883	0.760841	36.1584												195.388	26.5829	117.07	78.3183		#REF!		0.000138404	0.000133296	0.000128377	0.000132249	0.000127369	0.000122668	0.000118142	0.000113782	0.000117251	0.000112924	0.000108757	0.000104743	0.000100878
						4.2	5036.86	#REF!	13.7802	13.5	0	0	1.40187	153.57	197.188	253.194	0.767851	36.9263												197.188	24.7829	119.899	77.2887		#REF!		0.000132184	0.000127306	0.000122608	0.000126266	0.000121606	0.000117119	0.000112797	0.000108634	0.00011191	0.000107781	0.000103803	9.99729e-05	9.62837e-05
						4.22	5057.67	#REF!	13.8458	13.5	0	0	1.40187	154.972	198.988	255.506	0.77486	37.7011												198.988	22.9829	122.767	76.221		#REF!		0.000126252	0.000121593	0.000117106	0.000120561	0.000116112	0.000111828	0.000107701	0.000103727	0.000106821	0.000102879	9.90827e-05	9.54264e-05	9.1905e-05
						4.24	5078.31	#REF!	13.9114	13.5	0	0	1.40187	156.374	200.788	257.817	0.781869	38.483												200.788	21.1828	125.673	75.1151		#REF!		0.000120594	0.000116144	0.000111858	0.000115123	0.000110875	0.000106783	0.000102843	9.90478e-05	0.000101971	9.82078e-05	9.45838e-05	9.10934e-05	8.77319e-05
						4.26	5098.76	#REF!	13.9771	13.5	0	0	1.40187	157.776	202.588	260.128	0.788879	39.2719												202.588	19.3828	128.617	73.9708		#REF!		0.000115198	0.000110947	0.000106853	0.000109938	0.000105882	0.000101974	9.82112e-05	9.45871e-05	9.73482e-05	9.37559e-05	9.02961e-05	8.6964e-05	8.37549e-05
						4.28	5119.03	#REF!	14.0427	14	0	0	1.6125	159.388	204.659	262.787	0.796941	40.0688												204.272	17.6985	131.6	72.6723		#REF!		0.000110055	0.000105994	0.000102082	0.000104998	0.000101124	9.73919e-05	9.37979e-05	9.03366e-05	9.29452e-05	8.95154e-05	8.62121e-05	8.30307e-05	7.99667e-05
						4.3	5139.14	#REF!	14.1083	14	0	0	1.6125	161.001	206.729	265.445	0.805004	40.8738												205.824	16.1468	134.621	71.2027		#REF!		0.000105152	0.000101272	9.75347e-05	0.00010029	9.65896e-05	9.30252e-05	8.95924e-05	8.62863e-05	8.8751e-05	8.54759e-05	8.23217e-05	7.92838e-05	7.63581e-05
						4.32	5159.07	#REF!	14.1739	14	0	0	1.6125	162.613	208.799	268.104	0.813066	41.6869												207.254	14.7169	137.681	69.5725		#REF!		0.000100478	9.67703e-05	9.31993e-05	9.5804e-05	9.22687e-05	8.88638e-05	8.55845e-05	8.24263e-05	8.47552e-05	8.16276e-05	7.86154e-05	7.57143e-05	7.29203e-05
						4.34	5178.84	#REF!	14.2395	14	0	0	1.6125	164.226	210.87	270.762	0.821129	42.508												208.572	13.399	140.78	67.7916		#REF!		9.6022e-05	9.24786e-05	8.90659e-05	9.15281e-05	8.81505e-05	8.48976e-05	8.17647e-05	7.87475e-05	8.09483e-05	7.79612e-05	7.50842e-05	7.23135e-05	6.9645e-05
						4.36	5198.44	#REF!	14.3052	14	0	0	1.6125	165.838	212.94	273.421	0.829191	43.3372												209.787	12.184	143.918	65.869		#REF!		9.17732e-05	8.83865e-05	8.51249e-05	8.74525e-05	8.42254e-05	8.11173e-05	7.81239e-05	7.5241e-05	7.7321e-05	7.44677e-05	7.17197e-05	6.90731e-05	6.65241e-05
						4.38	5217.89	#REF!	14.3708	14	0	0	1.6125	167.451	215.011	276.08	0.837254	44.1744												210.907	11.0634	147.095	63.8128		#REF!		8.77217e-05	8.44846e-05	8.13669e-05	8.35675e-05	8.04837e-05	7.75137e-05	7.46533e-05	7.18985e-05	7.38644e-05	7.11387e-05	6.85135e-05	6.59853e-05	6.35503e-05
						4.4	5237.17	#REF!	14.4364	14	0	0	1.6125	169.063	217.081	278.738	0.845316	45.0198												211.941	10.0297	150.31	61.6308		#REF!		8.38581e-05	8.07636e-05	7.77832e-05	7.98639e-05	7.69168e-05	7.40784e-05	7.13448e-05	6.8712e-05	7.05704e-05	6.79662e-05	6.54581e-05	6.30426e-05	6.07162e-05
						4.42	5256.3	#REF!	14.502	14.5	0	0	1.33639	170.4	218.797	280.941	0.851998	45.8718												212.895	9.07572	153.565	59.3297		#REF!		8.01709e-05	7.72125e-05	7.43632e-05	7.63306e-05	7.35139e-05	7.08011e-05	6.81884e-05	6.56721e-05	6.74288e-05	6.49406e-05	6.25441e-05	6.02361e-05	5.80133e-05
						4.44	5275.28	#REF!	14.5676	14.5	0	0	1.33639	171.736	220.513	283.145	0.85868	46.7304												213.776	8.19507	156.86	56.9161		#REF!		7.6652e-05	7.38234e-05	7.10992e-05	7.29597e-05	7.02673e-05	6.76743e-05	6.5177e-05	6.27719e-05	6.44326e-05	6.20549e-05	5.9765e-05	5.75596e-05	5.54355e-05
						4.46	5294.11	#REF!	14.6333	14.5	0	0	1.33639	173.072	222.229	285.348	0.865362	47.5958												214.589	7.38181	160.193	54.3957		#REF!		7.32937e-05	7.0589e-05	6.79841e-05	6.97436e-05	6.71699e-05	6.46912e-05	6.2304e-05	6.00048e-05	6.1575e-05	5.93028e-05	5.71144e-05	5.50067e-05	5.29769e-05
						4.48	5312.79	#REF!	14.6989	14.5	0	0	1.33639	174.409	223.945	287.551	0.872044	48.4678												215.34	6.63048	163.567	51.7738		#REF!		7.00884e-05	6.7502e-05	6.50111e-05	6.6675e-05	6.42146e-05	6.1845e-05	5.95628e-05	5.73648e-05	5.88494e-05	5.66777e-05	5.45862e-05	5.25719e-05	5.06319e-05
						4.5	5331.32	#REF!	14.7645	14.5	0	0	1.33639	175.745	225.661	289.755	0.878726	49.3466												216.035	5.93611	166.979	49.0553		#REF!		6.70291e-05	6.45556e-05	6.21734e-05	6.37472e-05	6.13948e-05	5.91292e-05	5.69472e-05	5.48458e-05	5.62496e-05	5.41738e-05	5.21747e-05	5.02494e-05	4.83951e-05
						4.52	5349.72	#REF!	14.8301	14.5	0	0	1.33639	177.082	227.377	291.958	0.885408	50.232												216.677	5.29412	170.432	46.2448		#REF!		6.41091e-05	6.17433e-05	5.94649e-05	6.09535e-05	5.87042e-05	5.65379e-05	5.44515e-05	5.24422e-05	5.37696e-05	5.17854e-05	4.98745e-05	4.8034e-05	4.62614e-05
						4.54	5367.97	#REF!	14.8957	14.5	0	0	0	177.082	227.377	291.958	0.885408	51.1174												217.27	4.7004	173.924	43.3461		#REF!		6.13138e-05	5.90512e-05	5.68721e-05	5.828e-05	5.61294e-05	5.40581e-05	5.20632e-05	5.0142e-05	5.13972e-05	4.95006e-05	4.76739e-05	4.59146e-05	4.42203e-05
						4.56	5386.09	#REF!	14.9614	14.5	0	0	0	177.082	227.377	291.958	0.885408	52.0028												217.82	4.15114	177.457	40.3632		#REF!		5.86385e-05	5.64746e-05	5.43906e-05	5.57221e-05	5.36659e-05	5.16855e-05	4.97782e-05	4.79413e-05	4.91281e-05	4.73152e-05	4.55692e-05	4.38876e-05	4.22681e-05
						4.58	5404.07	#REF!	15.027	15	0	0	0	177.082	227.377	291.958	0.885408	52.8882												218.328	3.64287	181.029	37.2992		#REF!		5.60785e-05	5.40091e-05	5.20161e-05	5.32754e-05	5.13094e-05	4.9416e-05	4.75924e-05	4.58362e-05	4.69583e-05	4.52255e-05	4.35566e-05	4.19492e-05	4.04012e-05
						4.6	5421.92	#REF!	15.0926	15	0	0	0	177.082	227.377	291.958	0.885408	53.7736												218.798	3.17237	184.641	34.1573		#REF!		5.36295e-05	5.16504e-05	4.97444e-05	5.09353e-05	4.90557e-05	4.72454e-05	4.5502e-05	4.38229e-05	4.48838e-05	4.32275e-05	4.16323e-05	4.0096e-05	3.86164e-05
						4.62	5439.63	#REF!	15.1582	15	0	0	0	177.082	227.377	291.958	0.885408	54.659												219.234	2.73671	188.294	30.9404		#REF!		5.12868e-05	4.93943e-05	4.75715e-05	4.86976e-05	4.69006e-05	4.51699e-05	4.3503e-05	4.18977e-05	4.29007e-05	4.13175e-05	3.97928e-05	3.83244e-05	3.69102e-05
						4.64	5457.22	#REF!	15.2238	15	0	0	0	177.082	227.377	291.958	0.885408	55.5444												219.638	2.33316	191.987	27.6511		#REF!		4.90464e-05	4.72365e-05	4.54934e-05	4.65582e-05	4.48401e-05	4.31854e-05	4.15918e-05	4.0057e-05	4.10052e-05	3.9492e-05	3.80347e-05	3.66311e-05	3.52794e-05
						4.66	5474.68	#REF!	15.2895	15	0	0	0	177.082	227.377	291.958	0.885408	56.4298												220.012	1.95924	195.72	24.2918		#REF!
						4.68	5492.01	#REF!	15.3551	15	0	0	0	177.082	227.377	291.958	0.885408	57.3152												220.358	1.61265	199.494	20.8646		#REF!
						4.7	5509.23	#REF!	15.4207	15	0	0	0	177.082	227.377	291.958	0.885408	58.2006												220.68	1.29127	203.308	17.3717		#REF!
						4.72	5526.32	#REF!	15.4863	15	0	0	0	177.082	227.377	291.958	0.885408	59.0861												220.978	0.99318	207.163	13.8148		#REF!
						4.74	5543.29	#REF!	15.5519	15.5	0	0	0	177.082	227.377	291.958	0.885408	59.9715												221.254	0.716583	211.059	10.1956		#REF!
						4.76	5560.15	#REF!	15.6176	15.5	0	0	0	177.082	227.377	291.958	0.885408	60.8569												221.511	0.459841	214.995	6.5157		#REF!
						4.78	5576.89	#REF!	15.6832	15.5	0	0	0	177.082	227.377	291.958	0.885408	61.7423												221.749	0.221443	218.973	2.77649		#REF!
						4.8	5593.51	#REF!	15.7488	15.5	0	0	0	177.082	227.377	291.958	0.885408	62.6277												221.971	0	222.992	-1.02072		#REF!
						4.82	5610.02	#REF!	15.8144	15.5	0	0	0	177.082	227.377	291.958	0.885408	63.5131																	#REF!
						4.84	5626.43	#REF!	15.88	15.5	0	0	0	177.082	227.377	291.958	0.885408	64.3985																	#REF!
						4.86	5642.72	#REF!	15.9457	15.5	0	0	0	177.082	227.377	291.958	0.885408	65.2839																	#REF!
						4.88	5658.91	#REF!	16.0113	16	0	0	0	177.082	227.377	291.958	0.885408	66.1693																	#REF!
						4.9	5674.99	#REF!	16.0769	16	0	0	0	177.082	227.377	291.958	0.885408	67.0547																	#REF!
						4.92	5690.97	#REF!	16.1425	16	0	0	0	177.082	227.377	291.958	0.885408	67.9401																	#REF!
						4.94	5706.84	#REF!	16.2081	16	0	0	0	177.082	227.377	291.958	0.885408	68.8255
						4.96	5722.62	#REF!	16.2738	16	0	0	0	177.082	227.377	291.958	0.885408	69.711
							0
							0
							0
							0
							0
							0
							0
							0
							0
							0
							0
							0
							0
							0
							0
							0
							0
							0
							0
							0
							0
							0
							0
							0
[truncated: 138 more columns]

## Sheet: Bridgeport_5
																																					0.0557175	0.0657706	0.0633435	0.0666301	0.0641713	0.0618032	0.0595226	0.0573261	0.0603368	0.0581103	0.0559659	0.0539006	0.0519116
																																					0	1	2	3	4	5	6	7	8	9	10	11	12
	INPUTS			ERROR CHECK		Surge height (m)	Wall Length (m)	sum of middleH * dL	Surge height (ft)	Rounding (ft)	delta Area (sq m)	Building numbers	Building Values (million $)	Cum Value	2080	2130	Marginal Damage	Damage	2030	Expected Benefit (million $, PV)	Residual Dam (million $, PV)	Cost (Million $)	Net Benefit (million $, PV)	2080	Expected Benefit (million $, PV)	Residual Dam (million $, PV)	Cost (Million $)	Net Benefit (million $, PV)	2130	Expected Benefit (million $, PV)	Residual Dam (million $, PV)	Cost (million $)	Net Benefit (million $, PV)		Surge height (m)		0	1	2	3	4	5	6	7	8	9	10	11	12
	SPATIAL DATA					1.8	478.392	#REF!	5.9058	5.5	0	0	0	0	0	0	0	0		0	2.10534	1.26531	-1.26531		0	49.7159	0.01	-0.01		0	0	0.01	-0.01		1.8		0	0	0	0	0	0	0	0	0	0	0	0	0
	Target City	Bridgeport				1.82	495.356	#REF!	5.97142	5.5	0	0	0	0	0	0	0	0		0	2.10534	1.38838	-1.38838		0	49.7159	0.01	-0.01		0	0	0.01	-0.01		1.82		0	0	0	0	0	0	0	0	0	0	0	0	0
	Policy Year (base year: 2020)	#REF!				1.84	512.434	#REF!	6.03704	6	0	0	0	0	0	0	0	0		0	2.10534	1.51949	-1.51949		0	49.7159	0.01	-0.01		0	0	0.01	-0.01		1.84		0	0	0	0	0	0	0	0	0	0	0	0	0
	SLR rate (before policy)	3.14	mm/year			1.86	529.626	#REF!	6.10266	6	0	0	0	0	0	0	0	0		0	2.10534	1.65893	-1.65893		0	49.7159	0.371109	-0.371109		0	0	0.01	-0.01		1.86		0	0	0	0	0	0	0	0	0	0	0	0	0
	SLR rate (after policy)	#REF!	mm/year			1.88	546.93	#REF!	6.16828	6	0	0	0	0	0	0	0	0		0	2.10534	1.80699	-1.80699		0	49.7159	0.428284	-0.428284		0	0	0.01	-0.01		1.88		0	0	0	0	0	0	0	0	0	0	0	0	0
	MHHW	1.06	meter			1.9	564.348	#REF!	6.2339	6	0	0	0	0	0	0	0	0		0	2.10534	1.96396	-1.96396		0	49.7159	0.490989	-0.490989		0	0	0.01	-0.01		1.9		0	0	0	0	0	0	0	0	0	0	0	0	0
						1.92	581.876	#REF!	6.29952	6	0	0	0	0	0	0	0	0		0	2.10534	2.13013	-2.13013		0	49.7159	0.559493	-0.559493		0	0	0.01	-0.01		1.92		0	0	0	0	0	0	0	0	0	0	0	0	0
						1.94	599.516	#REF!	6.36514	6	0	0	0	0	0	0	0	0		0	2.10534	2.30581	-2.30581		0	49.7159	0.634065	-0.634065		0	0	0.01	-0.01		1.94		0	0	0	0	0	0	0	0	0	0	0	0	0
	GEV ESTIMATION					1.96	617.265	#REF!	6.43076	6	0	0	0	0	0	0	0	0		0	2.10534	2.4913	-2.4913		0	49.7159	0.714978	-0.714978		0	0	0.01	-0.01		1.96		0	0	0	0	0	0	0	0	0	0	0	0	0
	μ (location)	1.845				1.98	635.122	#REF!	6.49638	6	0	0	0	0	0	0	0	0		0	2.10534	2.68689	-2.68689		0	49.7159	0.802507	-0.802507		0	0	0.01	-0.01		1.98		0	0	0	0	0	0	0	0	0	0	0	0	0
	σ (scale)	0.1544				2	653.087	#REF!	6.562	6.5	0	0	0	0	0	0	0	0		0	2.10534	2.89289	-2.89289		0	49.7159	0.896931	-0.896931		0	0	0.01	-0.01		2		0	0	0	0	0	0	0	0	0	0	0	0	0
	k (shape)	0.0752				2.02	671.157	#REF!	6.62762	6.5	0	0	0	0	0	0	0	0		0	2.10534	3.10961	-3.10961		0	49.7159	0.998529	-0.998529		0	0	0.01	-0.01		2.02		0	0	0	0	0	0	0	0	0	0	0	0	0
						2.04	689.331	#REF!	6.69324	6.5	0	0	0	0	0	0	0	0		0	2.10534	3.33733	-3.33733		0	49.7159	1.10758	-1.10758		0	0	0.01	-0.01		2.04		0	0	0	0	0	0	0	0	0	0	0	0	0
	Coefficients of the cost function					2.06	707.608	#REF!	6.75886	6.5	0	0	0	0	0	0	0	0		0	2.10534	3.57639	-3.57639		0	49.7159	1.22437	-1.22437		0	0	0.0404752	-0.0404752		2.06		0	0	0	0	0	0	0	0	0	0	0	0	0
	coef1	1.16813				2.08	725.985	#REF!	6.82448	6.5	0	0	0	0	0	0	0	0		0	2.10534	3.82707	-3.82707		0	49.7159	1.34919	-1.34919		0	0	0.0265769	-0.0265769		2.08		0	0	0	0	0	0	0	0	0	0	0	0	0
	coef2	0.00148324				2.1	744.46	#REF!	6.8901	6.5	0	0	0	0	0	0	0	0		0	2.10534	4.08968	-4.08968		0	49.7159	1.48232	-1.48232		0	0	0.0153299	-0.0153299		2.1		0	0	0	0	0	0	0	0	0	0	0	0	0
	coef3	-3.90834e-07				2.12	763.031	#REF!	6.95572	6.5	0	0	0	0	0	0	0	0		0	2.10534	4.36454	-4.36454		0	49.7159	1.62405	-1.62405		0	0	0.00698326	-0.00698326		2.12		0	0	0	0	0	0	0	0	0	0	0	0	0
	coef4	1.07288e-10				2.14	781.696	#REF!	7.02134	7	0	0	0	0	0	0	0	0		0	2.10534	4.65194	-4.65194		0	49.7159	1.77466	-1.77466		0	0	0.00178852	-0.00178852		2.14		0	0	0	0	0	0	0	0	0	0	0	0	0
	q	9.40139e+06				2.16	800.453	#REF!	7.08696	7	0	0	0	0	0	0	0	0		0	2.10534	4.9522	-4.9522		0	49.7159	1.93445	-1.93445		0	0	0	0		2.16		0	0	0	0	0	0	0	0	0	0	0	0	0
	Growth Rate	0.005	%/year			2.18	819.297	#REF!	7.15258	7	0	0	0	0	0	0	0	0		0	2.10534	5.26562	-5.26562		0	49.7159	2.10372	-2.10372		0	0	0.00187455	-0.00187455		2.18		0	0	0	0	0	0	0	0	0	0	0	0	0
	discount rate	0.0426	%/year			2.2	838.228	#REF!	7.2182	7	0	0	0	0	0	0	0	0		0	2.10534	5.5925	-5.5925		0	49.7159	2.28274	-2.28274		0	0	0.00767146	-0.00767146		2.2		0	0	0	0	0	0	0	0	0	0	0	0	0
	useful_life	30	years			2.22	857.241	#REF!	7.28382	7	0	0	0	0	0	0	0	0		0	2.10534	5.93314	-5.93314		0	49.7159	2.47181	-2.47181		0	0	0.0176523	-0.0176523		2.22		0	0	0	0	0	0	0	0	0	0	0	0	0
	CapEx	0.005				2.24	876.333	#REF!	7.34944	7	0	0	0	0	0	0	0	0		0	2.10534	6.28784	-6.28784		0	49.7159	2.67123	-2.67123		0	0	0.0320808	-0.0320808		2.24		0	0	0	0	0	0	0	0	0	0	0	0	0
	Difference	0.02	meter			2.26	895.502	#REF!	7.41506	7	0	0	0	0	0	0	0	0		0	2.10534	6.65691	-6.65691		0	49.7159	2.88128	-2.88128		0	0	0.0512227	-0.0512227		2.26		0	0	0	0	0	0	0	0	0	0	0	0	0
	Minimum height where buildings locate	8	ft			2.28	914.744	#REF!	7.48068	7	0	0	0	0	0	0	0	0		0	2.10534	7.04063	-7.04063		0	49.7159	3.10225	-3.10225		0	0	0.0753456	-0.0753456		2.28		0	0	0	0	0	0	0	0	0	0	0	0	0
	A factor to account for other damages than buildings	2				2.3	934.054	#REF!	7.5463	7.5	0	0	0	0	0	0	0	0		0	2.10534	7.4393	-7.4393		0	49.7159	3.33443	-3.33443		0	0	0.104719	-0.104719		2.3		0	0	0	0	0	0	0	0	0	0	0	0	0
	Ratio of houses w/ basements	1	(1=All have basements; 0=No basements)			2.32	953.43	#REF!	7.61192	7.5	0	0	0	0	0	0	0	0		0	2.10534	7.85321	-7.85321		0	49.7159	3.57812	-3.57812		0	0	0.139613	-0.139613		2.32		0	0	0	0	0	0	0	0	0	0	0	0	0
	Average height of the first floor	0.9	meter			2.34	972.867	#REF!	7.67754	7.5	0	0	0	0	0	0	0	0		0	2.10534	8.28264	-8.28264		0	49.7159	3.83359	-3.83359		0	0	0.180299	-0.180299		2.34		0	0	0	0	0	0	0	0	0	0	0	0	0
	Coastal length 12ft	1749.31				2.36	992.361	#REF!	7.74316	7.5	0	0	0	0	0	0	0	0		0	2.10534	8.72789	-8.72789		0	49.7159	4.10113	-4.10113		0	0	0.227052	-0.227052		2.36		0	0	0	0	0	0	0	0	0	0	0	0	0
	OUTPUTS	2030	20800	2130		2.38	1011.91	#REF!	7.80878	7.5	0	0	0	0	0	0	0	0		0	2.10534	9.18921	-9.18921		0	49.7159	4.38103	-4.38103		0	0	0.280145	-0.280145		2.38		0	0	0	0	0	0	0	0	0	0	0	0	0
	Optimal Level of Flood Defense	No_Wall	3.22	3.8		2.4	1031.5	#REF!	7.8744	7.5	0	0	0	0	0	0	0	0		0	2.10534	9.6669	-9.6669		0	49.7159	4.67355	-4.67355		0	0	0.339852	-0.339852		2.4		0	0	0	0	0	0	0	0	0	0	0	0	0
	Maximum height of Walls					2.42	1051.15	#REF!	7.94002	7.5	0	0	0	0	0	0	0	0		0	2.10534	10.1612	-10.1612		0	49.7159	4.97899	-4.97899		0	0	0.406449	-0.406449		1.2		0	0	0	0	0	0	0	0	0	0	0	0	0
	Average height of Walls	#VALUE!	1.71	1.64		2.44	1070.83	#REF!	8.00564	8	0	0	0.834467	0.834467	1.07148	1.3758	0.00417233	0.00417233		0.0012196	2.10412	10.6724	-10.6712		0.0507394	49.6652	5.29762	-5.24688		0	0	0.48021	-0.48021		1.22		3.03993e-05	2.92775e-05	2.81971e-05	3.02119e-05	2.9097e-05	2.80233e-05	2.69892e-05	2.59932e-05	2.78481e-05	2.68205e-05	2.58307e-05	2.48775e-05	2.39595e-05
	Average Elevation of wall	1.12	1.51	2.16		2.46	1090.54	#REF!	8.07126	8	0	0	0.834467	1.66893	2.14295	2.75161	0.00834467	0.012517		0.00452536	2.10082	11.2008	-11.1962		0.190417	49.5255	5.62971	-5.43929		0	242.56	0.561411	-0.561411		1.24		8.19766e-05	7.89515e-05	7.60381e-05	8.14699e-05	7.84635e-05	7.5568e-05	7.27794e-05	7.00937e-05	7.51021e-05	7.23307e-05	6.96616e-05	6.70909e-05	6.46151e-05
	Wall Length	No_Wall	1529.31	1819.31		2.48	1110.29	#REF!	8.13688	8	0	0	0.834467	2.5034	3.21443	4.12741	0.012517	0.025034		0.0104937	2.09485	11.7465	-11.736		0.448241	49.2677	5.97552	-5.52727		0	242.56	0.650327	-0.650327		1.26		0.000147391	0.000141952	0.000136714	0.000146464	0.000141059	0.000135854	0.000130841	0.000126013	0.000135014	0.000130032	0.000125234	0.000120612	0.000116161
	Cost of Wall	No_Wall	25.579	27.9892		2.5	1130.06	#REF!	8.2025	8	0	0	0.834467	3.33787	4.28591	5.50321	0.0166893	0.0417233		0.0194649	2.08588	12.3099	-12.2905		0.846963	48.869	6.33532	-5.48835		0	242.56	0.747232	-0.747232		1.28		0.000220876	0.000212725	0.000204875	0.000219448	0.00021135	0.00020355	0.000196039	0.000188805	0.000202271	0.000194807	0.000187618	0.000180694	0.000174026
	Expected Benefit	No_Wall	37.2932	202.727		2.52	1149.85	#REF!	8.26812	8	0	0	0.834467	4.17233	5.35738	6.87902	0.0208617	0.062585		0.031592	2.07375	12.8912	-12.8597		1.46489	48.251	6.70937	-5.24448		0	242.56	0.852401	-0.852401		1.3		0.000297973	0.000286978	0.000276388	0.000295973	0.000285051	0.000274532	0.000264401	0.000254644	0.000272756	0.000262691	0.000252997	0.000243661	0.00023467
	Net Benefit	#VALUE!	11.7141	174.738		2.54	1169.66	#REF!	8.33374	8	0	0	0.834467	5.0068	6.42886	8.25482	0.025034	0.087619		0.046884	2.05846	13.4907	-13.4438		2.26205	47.4539	7.09793	-4.83588		0	242.56	0.966105	-0.966105		1.32		0.000375297	0.000361448	0.00034811	0.000372664	0.000358912	0.000345667	0.000332911	0.000320626	0.000343346	0.000330676	0.000318474	0.000306721	0.000295403
	Residual Damage	2.10534	12.4228	39.8336		2.56	1189.48	#REF!	8.39936	8	0	0	0.834467	5.84127	7.50034	9.63062	0.0292063	0.116825		0.0652412	2.0401	14.1085	-14.0432		3.24667	46.4692	7.50125	-4.25457		0	242.56	1.08862	-1.08862		1.34		0.000450337	0.000433718	0.000417713	0.000447018	0.000430523	0.000414636	0.000399335	0.000384599	0.000411726	0.000396533	0.0003819	0.000367807	0.000354234
	Expected Damage	2.10534	49.7159	242.56		2.58	1209.31	#REF!	8.46498	8	0	0	0.834467	6.67573	8.57181	11.0064	0.0333787	0.150204		0.0864856	2.01886	14.7448	-14.6583		4.42513	45.2908	7.91957	-3.49444		0	242.56	1.2202	-1.2202		1.36		0.000521287	0.00050205	0.000483524	0.000517241	0.000498154	0.000479771	0.000462067	0.000445016	0.000476236	0.000458662	0.000441737	0.000425436	0.000409737
						2.6	1219.31	#REF!	8.5306	8.5	0	0	1.03376	7.7095	9.89919	12.7108	0.0385475	0.188752		0.110512	1.99483	15.2769	-15.1663		5.65338	44.0625	8.28636	-2.63297		1.42306	241.137	1.35026	0.0728033		1.38		0.000590022	0.000568249	0.000547279	0.000585191	0.000563596	0.000542798	0.000522768	0.000503477	0.000538586	0.000518711	0.000499569	0.000481134	0.00046338
	Surge height (ft)	Area submerged (sq m)	delta Area (sq m)	Building numbers	Building Values (million $)	2.62	1229.31	#REF!	8.59622	8.5	0	0	1.03376	8.74326	11.2266	14.4152	0.0437163	0.232468		0.113117	1.99222	15.8212	-15.7081		5.68256	44.0334	8.66371	-2.98115		2.938	239.622	1.4879	1.4501		1.4		0.000654822	0.000630658	0.000607385	0.00064916	0.000625205	0.000602134	0.000579914	0.000558514	0.000597203	0.000575166	0.000553941	0.000533499	0.000513812
	3	654.64	0	0	0	2.64	1239.31	#REF!	8.66184	8.5	0	0	1.03376	9.77703	12.554	16.1196	0.0488851	0.281353		0.142125	1.96322	16.3781	-16.236		6.95074	42.7652	9.05177	-2.10103		7.60197	234.958	1.63327	5.9687		1.42		0.000714506	0.00068814	0.000662746	0.000707984	0.000681858	0.000656696	0.000632463	0.000609124	0.000651018	0.000626995	0.000603857	0.000581574	0.000560113
0.9144	3.5	2614.9	1960.26		0	2.66	1249.31	#REF!	8.72746	8.5	0	0	1.03376	10.8108	13.8813	17.824	0.054054	0.335407		0.173254	1.93209	16.9476	-16.7743		8.21403	41.5019	9.45066	-1.23663		13.8813	228.679	1.78651	12.0948		1.44		0.00076832	0.000739967	0.000712661	0.000760919	0.000732839	0.000705796	0.000679751	0.000654667	0.000699353	0.000673546	0.000648691	0.000624753	0.000601698
1.0668	4	2614.9	0		0	2.68	1259.31	#REF!	8.79308	8.5	0	0	1.03376	11.8446	15.2087	19.5284	0.0592228	0.39463		0.206231	1.89911	17.5299	-17.3236		9.45973	40.2562	9.86054	-0.400812		15.2087	227.352	1.94776	13.2609		1.46		0.000815838	0.000785732	0.000756737	0.000807553	0.000777753	0.000749053	0.000721411	0.00069479	0.000741837	0.000714462	0.000688097	0.000662705	0.00063825
1.2192	4.5	2614.9	0		0	2.7	1269.31	#REF!	8.8587	8.5	0	0	1.03376	12.8783	16.5361	21.2328	0.0643916	0.459021		0.240775	1.86457	18.125	-17.8842		10.6781	39.0378	10.2815	0.396586		16.5361	226.024	2.11715	14.4189		1.48		0.000856892	0.000825271	0.000794817	0.000847732	0.000816449	0.00078632	0.000757303	0.000729358	0.000778336	0.000749614	0.000721951	0.00069531	0.000669652
1.3716	5	3924.2	1309.3	0	0	2.72	1279.31	#REF!	8.92432	8.5	0	0	1.03376	13.9121	17.8635	22.9371	0.0695604	0.528582		0.276613	1.82873	18.7332	-18.4566		11.8621	37.8538	10.7138	1.14829		17.8635	224.697	2.29482	15.5686		1.5		0.000891508	0.00085861	0.000826926	0.000881489	0.000848961	0.000817632	0.00078746	0.000758401	0.000808892	0.000779042	0.000750294	0.000722607	0.000695941
1.524	5.5	5884.4	1960.2	0	0	2.74	1289.31	#REF!	8.98994	8.5	0	0	1.03376	14.9458	19.1908	24.6415	0.0747292	0.603311		0.313477	1.79186	19.3546	-19.0411		13.0067	36.7093	11.1574	1.84923		19.1908	223.37	2.4809	16.7099		1.52		0.000919855	0.000885911	0.000853219	0.000909005	0.000875461	0.000843155	0.000812041	0.000782075	0.000833679	0.000802914	0.000773285	0.00074475	0.000717267
1.6764	6	9112.2	3227.8	0	0	2.76	1299.31	#REF!	9.05556	9	0	0	3.7966	18.7424	24.0658	30.9011	0.0937122	0.697023		0.351878	1.75346	19.9893	-19.6374		14.1313	35.5847	11.6126	2.51866		24.0658	218.495	2.67554	21.3902		1.54		0.000961255	0.000925783	0.00089162	0.000949373	0.00091434	0.000880599	0.000848103	0.000816807	0.000870211	0.000838099	0.000807172	0.000777385	0.000748698
1.8288	6.5	15962.5	6850.3	0	0	2.78	1309.31	#REF!	9.12118	9	0	0	3.7966	22.539	28.9407	37.1606	0.112695	0.809718		0.392117	1.71322	20.6374	-20.2453		15.2469	34.469	12.0794	3.16751		28.9407	213.62	2.87887	26.0618		1.56		0.00101062	0.000973331	0.000937413	0.000997556	0.000960744	0.000925291	0.000891146	0.000858261	0.000913853	0.00088013	0.000847652	0.000816372	0.000786246
1.9812	7	20062.1	4099.6	0	0	2.8	1319.31	#REF!	9.1868	9	0	0	3.7966	26.3356	33.8156	43.4201	0.131678	0.941397		0.434337	1.671	21.2991	-20.8648		16.3594	33.3565	12.5581	3.80134		33.8156	208.745	3.09103	30.7246		1.58		0.00106401	0.00102475	0.000986931	0.00104964	0.00101091	0.000973601	0.000937674	0.000903072	0.000961011	0.000925548	0.000891394	0.0008585	0.000826819
2.1336	7.5	30776.6	10714.5	0	0	2.82	1329.31	#REF!	9.25242	9	0	0	3.7966	30.1322	38.6906	49.6797	0.150661	1.09206		0.478558	1.62678	21.9746	-21.496		17.4712	32.2447	13.0486	4.42253		38.6906	203.87	3.31215	35.3784		1.6		0.00111838	0.00107711	0.00103736	0.00110263	0.00106194	0.00102275	0.000985013	0.000948664	0.00100894	0.000971709	0.000935851	0.000901317	0.000868056
2.286	8	49286.7	18510.1	38.1216	6.67573	2.84	1339.31	#REF!	9.31804	9	0	0	3.7966	33.9288	43.5655	55.9392	0.169644	1.2617		0.524712	1.58063	22.6639	-22.1392		18.5827	31.1333	13.5513	5.03136		43.5655	198.995	3.54238	40.0231		1.62		0.00117146	0.00112823	0.0010866	0.00115429	0.00111169	0.00107067	0.00103116	0.000993105	0.00105559	0.00101663	0.000979119	0.000942987	0.000908189
2.4384	8.5	72217.6	22930.9	47.2263	8.27011	2.86	1349.31	#REF!	9.38366	9	0	0	3.7966	37.7254	48.4404	62.1987	0.188627	1.45033		0.572665	1.53268	23.3672	-22.7945		19.6933	30.0226	14.0662	5.62714		48.4404	194.12	3.78185	44.6586		1.64		0.00122157	0.0011765	0.00113308	0.00120296	0.00115856	0.00111581	0.00107464	0.00103498	0.00109945	0.00105888	0.0010198	0.000982171	0.000945927
2.5908	9	145907	73689	151.763	26.5762	2.88	1359.31	#REF!	9.44928	9	0	0	3.7966	41.522	53.3154	68.4583	0.20761	1.65794		0.622239	1.4831	24.0846	-23.4624		20.8018	28.9141	14.5934	6.20844		53.3154	189.245	4.03069	49.2847		1.66		0.00126753	0.00122076	0.00117571	0.00124748	0.00120145	0.00115711	0.00111441	0.00107329	0.00113947	0.00109742	0.00105693	0.00101793	0.000980362
2.7432	9.5	213404	67497.5	139.011	24.3432	2.9	1369.31	#REF!	9.5149	9.5	0	0	3.0429	44.565	57.2225	73.4752	0.222825	1.88076		0.673126	1.43221	24.8164	-24.1432		21.9046	27.8113	15.1331	6.77148		57.2225	185.338	4.28905	52.9335		1.68		0.00130592	0.00125773	0.00121132	0.00128451	0.00123711	0.00119146	0.00114749	0.00110514	0.00117261	0.00112933	0.00108766	0.00104752	0.00100887
2.8956	10	274457	61053.1	125.739	22.019	2.92	1379.31	#REF!	9.58052	9.5	0	0	3.0429	47.6079	61.1297	78.4921	0.238039	2.1188		0.725029	1.38031	25.5625	-24.8375		22.9988	26.7172	15.6854	7.31334		61.1297	181.431	4.55707	56.5726		1.7		0.00133697	0.00128763	0.00124012	0.00131427	0.00126578	0.00121907	0.00117408	0.00113075	0.00119907	0.00115483	0.00111221	0.00107117	0.00103164
3.048	10.5	335430	60973	125.574	21.9901	2.94	1389.31	#REF!	9.64614	9.5	0	0	3.0429	50.6508	65.0369	83.509	0.253254	2.37206		0.777667	1.32767	26.3232	-25.5455		24.0823	25.6336	16.2505	7.83178		65.0369	177.524	4.83487	60.202		1.72		0.001361	0.00131077	0.0012624	0.00133711	0.00128777	0.00124025	0.00119448	0.0011504	0.0012192	0.0011742	0.00113087	0.00108914	0.00104895
3.2004	11	385045	49614.7	102.182	17.8937	2.96	1399.31	#REF!	9.71176	9.5	0	0	3.0429	53.6937	68.944	88.5259	0.268468	2.64053		0.83078	1.27456	27.0985	-26.2678		25.1533	24.5626	16.8285	8.32476		68.944	173.616	5.1226	63.8214		1.74		0.0013784	0.00132753	0.00127855	0.00135342	0.00130348	0.00125538	0.00120905	0.00116444	0.00123335	0.00118783	0.001144	0.00110179	0.00106113
3.3528	11.5	434065	49019.7	100.956	17.6791	2.98	1409.31	#REF!	9.77738	9.5	0	0	3.0429	56.7366	72.8512	93.5428	0.283683	2.92421		0.884125	1.22122	27.8887	-27.0046		26.2102	23.5058	17.4196	8.79059		72.8512	169.709	5.42039	67.4308		1.76		0.00138962	0.00133834	0.00128896	0.00136366	0.00131333	0.00126487	0.00121819	0.00117324	0.00124195	0.00119612	0.00115198	0.00110947	0.00106853
3.5052	12	468548	34483.5	71.0189	12.4366	3	1419.31	#REF!	9.843	9.5	0	0	3.0429	59.7795	76.7583	98.5597	0.298897	3.22311		0.937483	1.16786	28.6939	-27.7564		27.2517	22.4642	18.0238	9.22792		76.7583	165.802	5.72839	71.03		1.78		0.00139514	0.00134365	0.00129407	0.00136828	0.00131779	0.00126916	0.00122232	0.00117722	0.00124544	0.00119948	0.00115522	0.00111259	0.00107153
3.6576	12.5	480000	11451.9	22	4	3.02	1429.31	#REF!	9.90862	9.5	0	0	3.0429	62.8224	80.6655	103.577	0.314112	3.53722		0.990654	1.11469	29.5141	-28.5235		28.2769	21.439	18.6413	9.63563		80.6655	161.895	6.04672	74.6188		1.8		0.00139542	0.00134393	0.00129434	0.00136778	0.00131731	0.00126869	0.00122188	0.00117679	0.00124427	0.00119835	0.00115413	0.00111154	0.00107053
3.81	13	504209	24209.3	48	9	3.04	1439.31	#REF!	9.97424	9.5	0	0	3.0429	65.8653	84.5727	108.593	0.329326	3.86654		1.04346	1.06188	30.3496	-29.3062		29.2845	20.4314	19.2723	10.0122		84.5727	157.988	6.37553	78.1971		1.82		0.00139096	0.00133963	0.0012902	0.00136263	0.00131235	0.00126392	0.00121728	0.00117236	0.00123888	0.00119316	0.00114913	0.00110673	0.00106589
3.9624	13.5	530019	25809.3	53.1544	10	3.06	1449.31	#REF!	10.0399	10	0	0	2.75238	68.6176	88.1068	113.131	0.343088	4.20963		1.09572	1.00962	31.2005	-30.1047		30.2728	19.4431	19.9169	10.3559		88.1068	154.454	6.71495	81.3918		1.84		0.00138175	0.00133076	0.00128165	0.00135284	0.00130292	0.00125484	0.00120854	0.00116394	0.00122929	0.00118392	0.00114023	0.00109816	0.00105763
4.1148	14	544953	14934.3	30.7573	5.38611	3.08	1459.31	#REF!	10.1055	10	0	0	2.75238	71.37	91.6409	117.669	0.35685	4.56648		1.14729	0.958047	32.0668	-30.9195		31.2404	18.4756	20.5752	10.6652		91.6409	150.92	7.06512	84.5758		1.86		0.00136836	0.00131787	0.00126923	0.00133899	0.00128958	0.00124199	0.00119616	0.00115202	0.00121601	0.00117114	0.00112792	0.0010863	0.00104621
4.2672	14.5	554699	9746.4	20.0728	3.51507	3.1	1469.31	#REF!	10.1711	10	0	0	2.75238	74.1224	95.175	122.207	0.370612	4.93709		1.19804	0.907303	32.9488	-31.7508		32.1858	17.5301	21.2473	10.9385		95.175	147.385	7.42618	87.7489		1.88		0.00135134	0.00130147	0.00125345	0.00132161	0.00127284	0.00122587	0.00118063	0.00113706	0.00119955	0.00115529	0.00111266	0.0010716	0.00103205
4.4196	15	572954	18254.3	37.5948	6.58348	3.12	1479.31	#REF!	10.2367	10	0	0	2.75238	76.8748	98.7092	126.745	0.384374	5.32147		1.24785	0.857494	33.8466	-32.5988		33.1072	16.6087	21.9335	11.1738		98.7092	143.851	7.79827	90.9109		1.9		0.00133118	0.00128206	0.00123475	0.00130118	0.00125316	0.00120692	0.00116238	0.00111949	0.00118036	0.0011368	0.00109485	0.00105445	0.00101554
4.572	15.5	581002	8048.6	16.5761	2.90276	3.14	1489.31	#REF!	10.3023	10	0	0	2.75238	79.6272	102.243	131.283	0.398136	5.7196		1.29663	0.808714	34.7604	-33.4637		34.0029	15.713	22.6338	11.3691		102.243	140.317	8.18151	94.0618		1.92		0.00130834	0.00126006	0.00121356	0.00127816	0.00123099	0.00118556	0.00114181	0.00109968	0.00115884	0.00111608	0.00107489	0.00103523	0.000997024
4.7244	16	593036	12033.5	24.783	4.33993	3.16	1499.31	#REF!	10.368	10	0	0	2.75238	82.3795	105.777	135.821	0.411898	6.1315		1.3443	0.761038	35.6901	-34.3458		34.8709	14.8451	23.3483	11.5225		105.777	136.783	8.57606	97.2014		1.94		0.00128323	0.00123588	0.00119027	0.00125295	0.00120672	0.00116218	0.0011193	0.00107799	0.00113537	0.00109347	0.00105312	0.00101426	0.000976832
4.8768	16.5	605799	12763.5	26.2865	4.6032	3.18	1509.31	#REF!	10.4336	10	0	0	2.75238	85.1319	109.312	140.359	0.42566	6.55716		1.39081	0.714528	36.6361	-35.2453		35.7093	14.0066	24.0773	11.632		109.312	133.249	8.98204	100.329		1.96		0.00125623	0.00120987	0.00116523	0.00122593	0.00118069	0.00113712	0.00109516	0.00105475	0.00111029	0.00106932	0.00102986	0.000991853	0.000955252
5.0292	17	621327	15527.6	31.9792	5.60008	3.2	1519.31	#REF!	10.4992	10	0	0	2.75238	87.8843	112.846	144.897	0.439421	6.99658		1.43611	0.669231	37.5984	-36.1623		36.517	13.1989	24.8208	11.6962		112.846	129.715	9.3996	103.446		1.98		0.00122768	0.00118237	0.00113874	0.00119743	0.00115325	0.00111069	0.0010697	0.00103023	0.0010839	0.0010439	0.00100538	0.000968279	0.000932548
5.1816	17.5	640571	19243.9	39.6329	6.94038	3.22	1529.31	#REF!	10.5648	10.5	0	0	3.14145	91.0257	116.879	150.076	0.455129	7.45171		1.48017	0.625172	38.5772	-37.097		37.2932	12.4228	25.579	11.7141		116.879	125.681	9.82887	107.05		2		0.00119819	0.00115398	0.00111139	0.00116806	0.00112496	0.00108344	0.00104346	0.00100496	0.00105675	0.00101776	0.000980201	0.00094403	0.000909193
5.334	18	655536	14965	30.8205	5.39718	3.24	1539.31	#REF!	10.6304	10.5	0	0	3.14145	94.1672	120.913	155.255	0.470836	7.92255		1.52297	0.58237	39.5726	-38.0496		38.0375	11.6784	26.3521	11.6855		120.913	121.647	10.27	110.643		2.02		0.00116797	0.00112487	0.00108336	0.00113801	0.00109602	0.00105557	0.00101662	0.000979103	0.00102903	0.000991055	0.000954483	0.000919261	0.000885338
5.4864						3.26	1549.31	#REF!	10.6961	10.5	0	0	3.14145	97.3086	124.947	160.435	0.486543	8.40909		1.56451	0.540834	40.5847	-39.0202		38.7501	10.9658	27.1401	11.61		124.947	117.614	10.7231	114.224		2.04		0.0011372	0.00109523	0.00105481	0.00110746	0.00106659	0.00102723	0.000989325	0.000952817	0.00100088	0.000963948	0.000928377	0.000894118	0.000861123
						3.28	1559.31	#REF!	10.7617	10.5	0	0	3.14145	100.45	128.98	165.614	0.50225	8.91134		1.60477	0.50057	41.6137	-40.0089		39.4311	10.2849	27.9431	11.4879		128.98	113.58	11.1883	117.792		2.06		0.00110604	0.00106522	0.00102591	0.00107657	0.00103684	0.000998578	0.000961728	0.000926239	0.000972465	0.000936579	0.000902018	0.000868731	0.000836674
		2030	2080	2130		3.3	1569.31	#REF!	10.8273	10.5	0	0	3.14145	103.592	133.014	170.794	0.517958	9.4293		1.64377	0.461575	42.6597	-41.016		40.0809	9.63503	28.7615	11.3194		133.014	109.546	11.6658	121.348		2.08		0.00107464	0.00103499	0.000996793	0.00104548	0.0010069	0.000969747	0.000933961	0.000899496	0.000943908	0.000909076	0.00087553	0.000843221	0.000812104
	12 ft wall	4.78	5.17	5.82		3.32	1579.31	#REF!	10.8929	10.5	0	0	3.14145	106.733	137.048	175.973	0.533665	9.96296		1.6815	0.423845	43.7229	-42.0414		40.7002	9.01575	29.5952	11.105		137.048	105.513	12.1557	124.892		2.1		0.00104315	0.00100466	0.000967584	0.00101434	0.000976912	0.000940862	0.000906142	0.000872704	0.000915333	0.000881555	0.000849024	0.000817694	0.000787519
	Length	2889.97	3082.99	3364.33		3.34	1589.31	#REF!	10.9585	10.5	0	0	3.14145	109.874	141.082	181.152	0.549372	10.5123		1.71797	0.38737	44.8034	-43.0854		41.2896	8.42628	30.4444	10.8453		141.082	101.479	12.6581	128.423		2.12		0.00101169	0.000974355	0.000938399	0.000983263	0.000946979	0.000912034	0.000878378	0.000845964	0.000886846	0.00085412	0.000822601	0.000792245	0.00076301
	Cost	229.49	244.817	267.159		3.36	1599.31	#REF!	11.0242	11	0	0	2.23672	112.111	143.954	184.84	0.560556	11.0729		1.75319	0.352149	45.9013	-44.1481		41.8499	7.86599	31.3092	10.5407		143.954	98.6069	13.1732	130.78		2.14		0.00097996	0.000943797	0.00090897	0.000951963	0.000916834	0.000883001	0.000850416	0.000819034	0.000858192	0.000826523	0.000796023	0.000766648	0.000738357
						3.38	1609.31	#REF!	11.0898	11	0	0	2.23672	114.348	146.826	188.528	0.571739	11.6446		1.78716	0.318177	47.0168	-45.2296		42.3818	7.33414	32.1899	10.1919		146.826	95.7349	13.7011	133.124		2.16		0.000948161	0.000913172	0.000879474	0.000920629	0.000886656	0.000853937	0.000822425	0.000792076	0.00082954	0.000798928	0.000769446	0.000741052	0.000713706
						3.4	1619.31	#REF!	11.1554	11	0	0	2.23672	116.585	149.698	192.215	0.582923	12.2276		1.8199	0.285442	48.15	-46.3301		42.8861	6.82984	33.0864	9.79965		149.698	92.8629	14.242	135.456		2.18		0.000916458	0.000882639	0.000850068	0.000889421	0.0008566	0.00082499	0.000794546	0.000765226	0.000801034	0.000771474	0.000743006	0.000715587	0.000689181
						3.42	1629.31	#REF!	11.221	11	0	0	2.23672	118.821	152.57	195.903	0.594106	12.8217		1.85141	0.253926	49.301	-47.4496		43.3638	6.35215	33.9991	9.36472		152.57	89.9909	14.7959	137.774		2.2		0.000884991	0.000852333	0.00082088	0.000858477	0.000826798	0.000796287	0.000766903	0.000738603	0.000772796	0.000744278	0.000716813	0.000690361	0.000664886
						3.44	1639.31	#REF!	11.2866	11	0	0	2.23672	121.058	155.442	199.591	0.60529	13.4269		1.88173	0.22361	50.47	-48.5883		43.8159	5.90006	34.9279	8.88799		155.442	87.1189	15.363	140.078		2.22		0.000853878	0.000822369	0.000792022	0.00082791	0.000797359	0.000767935	0.000739597	0.000712304	0.000744928	0.000717439	0.000690964	0.000665466	0.000640909
						3.46	1649.31	#REF!	11.3523	11	0	0	2.23672	123.295	158.314	203.279	0.616474	14.0434		1.91087	0.194468	51.6571	-49.7463		44.2434	5.47253	35.873	8.37038		158.314	84.2469	15.9436	142.37		2.24		0.000823222	0.000792843	0.000763586	0.000797817	0.000768376	0.000740021	0.000712713	0.000686413	0.000717516	0.000691038	0.000665538	0.000640978	0.000617325
						3.48	1659.31	#REF!	11.4179	11	0	0	2.23672	125.531	161.186	206.966	0.627657	14.6711		1.93887	0.166474	52.8625	-50.9237		44.6474	5.06848	36.8346	7.81281		161.186	81.3749	16.5376	144.648		2.26		0.000793103	0.000763836	0.000735649	0.000768276	0.000739925	0.000712621	0.000686324	0.000660997	0.000690629	0.000665144	0.000640599	0.000616959	0.000594192
						3.5	1669.31	#REF!	11.4835	11	0	0	2.23672	127.768	164.058	210.654	0.638841	15.3099		1.96574	0.1396	54.0863	-52.1206		45.0291	4.68686	37.8129	7.21621		164.058	78.5029	17.1452	146.912		2.28		0.000763591	0.000735413	0.000708275	0.000739353	0.00071207	0.000685793	0.000660486	0.000636113	0.000664326	0.000639811	0.0006162	0.000593461	0.000571562
						3.52	1679.31	#REF!	11.5491	11.5	0	0	2.52559	130.294	167.3	214.818	0.651469	15.9614		1.99153	0.113812	55.3286	-53.3371		45.3894	4.32656	38.8078	6.58153		167.3	75.26	17.7666	149.534		2.3		0.000734807	0.000707691	0.000681576	0.000711164	0.000684921	0.000659646	0.000635304	0.00061186	0.000638708	0.000615139	0.000592439	0.000570577	0.000549521
						3.54	1689.31	#REF!	11.6147	11.5	0	0	2.52559	132.819	170.543	218.982	0.664097	16.6255		2.01626	0.089078	56.5896	-54.5733		45.7294	3.98653	39.8197	5.90971		170.543	72.0171	18.402	152.141		2.32		0.000706779	0.000680698	0.000655579	0.000683736	0.000658505	0.000634205	0.000610801	0.000588261	0.000613799	0.000591149	0.000569334	0.000548325	0.000528091
						3.56	1699.31	#REF!	11.6804	11.5	0	0	2.52559	135.345	173.786	223.146	0.676725	17.3022		2.03998	0.0653635	57.8693	-55.8294		46.0502	3.66571	40.8486	5.20166		173.786	68.7742	19.0513	154.735		2.34		0.00067953	0.000654454	0.000630303	0.000657087	0.000632839	0.000609486	0.000586995	0.000565334	0.000589615	0.000567857	0.000546902	0.00052672	0.000507283
						3.58	1709.31	#REF!	11.746	11.5	0	0	2.52559	137.87	177.029	227.31	0.689352	17.9916		2.06271	0.0426348	59.1681	-57.1054		46.3528	3.3631	41.8946	4.45824		177.029	65.5312	19.7149	157.314		2.36		0.000653073	0.000628973	0.000605763	0.00063123	0.000607936	0.000585502	0.000563896	0.000543087	0.000566164	0.000545272	0.00052515	0.000505771	0.000487107
						3.6	1719.31	#REF!	11.8116	11.5	0	0	2.52559	140.396	180.272	231.474	0.70198	18.6935		2.08448	0.0208582	60.4859	-58.4014		46.6382	3.07773	42.9579	3.68029		180.272	62.2883	20.3927	159.879		2.38		0.000627418	0.000604265	0.000581966	0.000606172	0.000583803	0.00056226	0.000541511	0.000521529	0.000543454	0.0005234	0.000504085	0.000485483	0.000467568
						3.62	1729.31	#REF!	11.8772	11.5	0	0	2.52559	142.922	183.515	235.638	0.714608	19.4082		2.10534	0	61.8229	-59.7175		46.9073	2.80866	44.0387	2.8686		183.515	59.0454	21.0851	162.43		2.4		0.000602568	0.000580332	0.000558917	0.000581917	0.000560443	0.000539762	0.000519843	0.00050066	0.000521484	0.000502241	0.000483707	0.000465857	0.000448666
						3.64	1739.31	#REF!	11.9428	11.5	0	0	2.52559	145.447	186.758	239.802	0.727236	20.1354							47.1609	2.555	45.137	2.02394		186.758	55.8025	21.792	164.966		2.42		0.000578524	0.000557175	0.000536615	0.000558462	0.000537854	0.000518006	0.00049889	0.00048048	0.000500253	0.000481792	0.000464013	0.00044689	0.000430399
						3.66	1749.31	#REF!	12.0085	12	0	0	1.55457	147.002	188.754	242.365	0.735009	20.8704							47.4	2.31595	46.253	1.14695		188.754	53.8064	22.5136	166.24		2.44		0.000555152	0.000534666	0.000514936	0.000535678	0.00051591	0.000496872	0.000478537	0.000460878	0.000479642	0.000461942	0.000444896	0.000428478	0.000412666
						3.68	1759.31	#REF!	12.0741	12	0	0	1.55457	148.556	190.75	244.928	0.742782	21.6132							47.6252	2.09074	47.3869	0.238295		190.75	51.8103	23.2502	167.5		2.46		0.000532475	0.000512825	0.000493901	0.000513584	0.000494632	0.000476379	0.0004588	0.000441869	0.000459668	0.000442705	0.000426369	0.000410635	0.000395482
						3.7	1769.31	#REF!	12.1397	12	0	0	1.55457	150.111	192.746	247.491	0.750555	22.3637							47.8373	1.87861	48.5387	-0.70143		192.746	49.8141	24.0017	168.745		2.48		0.000510505	0.000491667	0.000473523	0.000492194	0.000474031	0.000456538	0.000439691	0.000423466	0.000440342	0.000424092	0.000408443	0.00039337	0.000378854
						3.72	1779.31	#REF!	12.2053	12	0	0	1.55457	151.666	194.742	250.054	0.758328	23.1221							48.0371	1.67885	49.7087	-1.67164		194.742	47.818	24.7684	169.974		2.5		0.000489253	0.000471199	0.000453811	0.000471514	0.000454114	0.000437356	0.000421217	0.000405673	0.000421668	0.000406108	0.000391122	0.000376689	0.000362788
						3.74	1789.31	#REF!	12.2709	12	0	0	1.55457	153.22	196.739	252.617	0.766101	23.8882							48.2252	1.49077	50.8969	-2.67178		196.739	45.8219	25.5503	171.188		2.52		0.000468721	0.000451424	0.000434765	0.000451545	0.000434882	0.000418834	0.000403379	0.000388493	0.000403648	0.000388753	0.000374407	0.000360591	0.000347284
						3.76	1799.31	#REF!	12.3366	12	0	0	1.55457	154.775	198.735	255.18	0.773874	24.662							48.4022	1.3137	52.1036	-3.70133		198.735	43.8258	26.3477	172.387		2.54		0.000448907	0.000432341	0.000416387	0.000432287	0.000416334	0.000400971	0.000386174	0.000371924	0.000386278	0.000372024	0.000358295	0.000345074	0.00033234
						3.78	1809.31	#REF!	12.4022	12	0	0	1.55457	156.329	200.731	257.743	0.781646	25.4437							48.5689	1.14702	53.3287	-4.7598		200.731	41.8297	27.1606	173.57		2.56		0.000429806	0.000413945	0.00039867	0.000413731	0.000398464	0.00038376	0.000369598	0.00035596	0.000369552	0.000355915	0.000342781	0.000330132	0.000317949
						3.8	1819.31	#REF!	12.4678	12	0	0	1.55457	157.884	202.727	260.306	0.789419	26.2331							48.7258	0.990131	54.5725	-5.84673		202.727	39.8336	27.9892	174.738		2.58		0.000411411	0.000396229	0.000381608	0.000395871	0.000381263	0.000367193	0.000353643	0.000340593	0.00035346	0.000340417	0.000327855	0.000315757	0.000304105
						3.82	1829.31	#REF!	12.5334	12.5	0	0	0.5	158.384	203.369	261.131	0.791919	27.025							48.8734	0.842493	55.8351	-6.96171		203.369	39.1916	28.8337	174.535		2.6		0.000393634	0.000379108	0.000365118	0.00037862	0.000364648	0.000351192	0.000338233	0.000325751	0.000337927	0.000325457	0.000313447	0.00030188	0.00029074
						3.84	1839.31	#REF!	12.599	12.5	0	0	0.5	158.884	204.011	261.955	0.794419	27.8194							49.0123	0.703589	57.1167	-8.10437		204.011	38.5495	29.6941	174.317		2.62		0.000376478	0.000362585	0.000349205	0.000361981	0.000348624	0.000335759	0.000323369	0.000311436	0.000322953	0.000311035	0.000299557	0.000288503	0.000277857
						3.86	1849.31	#REF!	12.6647	12.5	0	0	0.5	159.384	204.653	262.78	0.796919	28.6164							49.143	0.572923	58.4173	-9.27434		204.653	37.9075	30.5706	174.082		2.64		0.000359943	0.00034666	0.000333868	0.000345953	0.000333187	0.000320891	0.00030905	0.000297645	0.000308535	0.00029715	0.000286184	0.000275624	0.000265453
						3.88	1859.31	#REF!	12.7303	12.5	0	0	0.5	159.884	205.295	263.604	0.799419	29.4158							49.2659	0.450023	59.7372	-10.4713		205.295	37.2655	31.4634	173.832		2.66		0.000344024	0.000331329	0.000319102	0.00033053	0.000318333	0.000306586	0.000295272	0.000284376	0.00029467	0.000283796	0.000273323	0.000263237	0.000253523
						3.9	1869.31	#REF!	12.7959	12.5	0	0	0.5	160.384	205.937	264.428	0.801919	30.2177							49.3815	0.334438	61.0764	-11.6949		205.937	36.6235	32.3725	173.564		2.68		0.000328714	0.000316584	0.000304901	0.000315705	0.000304054	0.000292834	0.000282028	0.000271621	0.000281348	0.000270966	0.000260967	0.000251337	0.000242062
						3.92	1879.31	#REF!	12.8615	12.5	0	0	0.5	160.884	206.579	265.253	0.804419	31.0221							49.4902	0.225743	62.4351	-12.9449		206.579	35.9815	33.2981	173.281		2.7		0.000314004	0.000302417	0.000291257	0.000301467	0.000290342	0.000279628	0.000269309	0.000259371	0.000268561	0.000258651	0.000249106	0.000239914	0.00023106
						3.94	1889.31	#REF!	12.9271	12.5	0	0	0.5	161.384	207.221	266.077	0.806919	31.829							49.5414	0.17447	63.8134	-14.272		207.221	35.3395	34.2405	172.981		2.72		0.000299883	0.000288816	0.000278159	0.000287806	0.000277185	0.000266956	0.000257105	0.000247617	0.000256298	0.00024684	0.000237731	0.000228958	0.000220509
						3.96	1899.31	#REF!	12.9928	12.5	0	0	0.5	161.884	207.863	266.901	0.809419	32.6385							49.5895	0.126467	65.2115	-15.6221		207.863	34.6975	35.1996	172.663		2.74		0.000286336	0.00027577	0.000265594	0.000274707	0.000264569	0.000254806	0.000245403	0.000236348	0.000244545	0.00023552	0.000226829	0.000218459	0.000210397
						3.98	1909.31	#REF!	13.0584	13	0	0	1.28571	163.17	209.514	269.021	0.815848	33.4543							49.6344	0.081519	66.6295	-16.9951		209.514	33.0466	36.1756	173.338		2.76		0.000273383	0.000263295	0.000253578	0.000262187	0.000252511	0.000243193	0.000234219	0.000225576	0.000233316	0.000224706	0.000216414	0.000208428	0.000200736
						4	1919.31	#REF!	13.124	13	0	0	1.28571	164.455	211.165	271.141	0.822276	34.2766							49.6765	0.0394258	68.0675	-18.3911		211.165	31.3957	37.1687	173.996		2.78		0.000261001	0.000251369	0.000242093	0.000250224	0.00024099	0.000232097	0.000223532	0.000215283	0.000222591	0.000214377	0.000206466	0.000198847	0.00019151
						4.02	1929.31	#REF!	13.1896	13	0	0	1.28571	165.741	212.816	273.261	0.828705	35.1053							49.7159	0	69.5258	-19.8098		212.816	29.7448	38.179	174.637		2.8		0.000249168	0.000239973	0.000231117	0.000238797	0.000229984	0.000221498	0.000213324	0.000205452	0.000212352	0.000204516	0.000196969	0.0001897	0.0001827
						4.04	2454.08	#REF!	13.2552	13	0	0	1.28571	167.027	214.467	275.381	0.835134	35.9404												214.467	28.0939	49.6136	164.853		2.82		0.000237863	0.000229085	0.000220632	0.000227884	0.000219475	0.000211376	0.000203575	0.000196063	0.000202578	0.000195102	0.000187902	0.000180968	0.00017429
						4.06	2467.34	#REF!	13.3209	13	0	0	1.28571	168.312	216.117	277.5	0.841562	36.782												216.117	26.443	50.9486	165.169		2.84		0.000227065	0.000218686	0.000210616	0.000217465	0.00020944	0.000201712	0.000194268	0.000187099	0.00019325	0.000186118	0.00017925	0.000172635	0.000166265
						4.08	2480.5	#REF!	13.3865	13	0	0	1.28571	169.598	217.768	279.62	0.847991	37.63												217.768	24.7921	52.3044	165.464		2.86		0.000216754	0.000208756	0.000201052	0.00020752	0.000199863	0.000192487	0.000185384	0.000178543	0.000184349	0.000177546	0.000170995	0.000164685	0.000158607
						4.1	2493.58	#REF!	13.4521	13	0	0	1.28571	170.884	219.419	281.74	0.854419	38.4844												219.419	23.1412	53.6812	165.738		2.88		0.00020691	0.000199275	0.000191921	0.00019803	0.000190722	0.000183684	0.000176906	0.000170377	0.000175859	0.000169369	0.000163119	0.0001571	0.000151303
						4.12	2506.56	#REF!	13.5177	13.5	0	0	1.25	172.134	221.024	283.801	0.860669	39.3451												221.024	21.5362	55.0789	165.945		2.9		0.000197512	0.000190224	0.000183204	0.000188973	0.000181999	0.000175283	0.000168815	0.000162585	0.00016776	0.000161569	0.000155607	0.000149865	0.000144335
						4.14	2519.45	#REF!	13.5833	13.5	0	0	1.25	173.384	222.629	285.862	0.866919	40.212												222.629	19.9312	56.4978	166.131		2.92		0.000188542	0.000181584	0.000174884	0.000180331	0.000173677	0.000167268	0.000161095	0.00015515	0.000160036	0.00015413	0.000148442	0.000142964	0.000137689
						4.16	2532.25	#REF!	13.649	13.5	0	0	1.25	174.634	224.234	287.923	0.873169	41.0852												224.234	18.3261	57.9378	166.296		2.94		0.000179981	0.000173339	0.000166943	0.000172087	0.000165737	0.000159621	0.000153731	0.000148058	0.00015267	0.000147036	0.00014161	0.000136384	0.000131351
						4.18	2544.96	#REF!	13.7146	13.5	0	0	1.25	175.884	225.839	289.983	0.879419	41.9646												225.839	16.7211	59.3991	166.44		2.96		0.000171812	0.000165472	0.000159366	0.000164224	0.000158164	0.000152327	0.000146706	0.000141292	0.000145646	0.000140272	0.000135095	0.00013011	0.000125309
						4.2	2557.59	#REF!	13.7802	13.5	0	0	1.25	177.134	227.444	292.044	0.885669	42.8502												227.444	15.1161	60.8817	166.563		2.98		0.000164018	0.000157965	0.000152136	0.000156724	0.000150941	0.000145371	0.000140006	0.00013484	0.00013895	0.000133823	0.000128884	0.000124128	0.000119548
						4.22	2570.13	#REF!	13.8458	13.5	0	0	1.25	178.384	229.049	294.105	0.891919	43.7422												229.049	13.511	62.3857	166.664		3		0.000156582	0.000150804	0.000145239	0.000149572	0.000144052	0.000138737	0.000133617	0.000128686	0.000132567	0.000127675	0.000122964	0.000118426	0.000114056
						4.24	2582.58	#REF!	13.9114	13.5	0	0	1.25	179.634	230.654	296.166	0.898169	44.6403												230.654	11.906	63.9112	166.743		3.02		0.000149489	0.000143973	0.00013866	0.000142752	0.000137484	0.000132411	0.000127524	0.000122818	0.000126482	0.000121815	0.00011732	0.00011299	0.000108821
						4.26	2594.95	#REF!	13.9771	13.5	0	0	1.25	180.884	232.259	298.227	0.904419	45.5447												232.259	10.301	65.4582	166.801		3.04		0.000142723	0.000137457	0.000132384	0.000136249	0.000131221	0.000126379	0.000121715	0.000117223	0.000120683	0.000116229	0.00011194	0.000107809	0.000103831
						4.28	2607.24	#REF!	14.0427	14	0	0	0.769444	181.653	233.247	299.496	0.908267	46.453												233.247	9.313	67.0269	166.221		3.06		0.000136263	0.000131235	0.000126392	0.000130042	0.000125243	0.000120621	0.00011617	0.000111883	0.000115149	0.0001109	0.000106807	0.000102866	9.90701e-05
						4.3	2619.45	#REF!	14.1083	14	0	0	0.769444	182.423	234.235	300.764	0.912114	47.3651												234.235	8.32501	68.6172	165.618		3.08		0.000130095	0.000125295	0.000120671	0.000124118	0.000119538	0.000115126	0.000110878	0.000106786	0.00010987	0.000105816	0.000101911	9.81502e-05	9.45282e-05
						4.32	2631.57	#REF!	14.1739	14	0	0	0.769444	183.192	235.223	302.033	0.915961	48.2811												235.223	7.33703	70.2293	164.994		3.1		0.000124208	0.000119625	0.00011521	0.000118465	0.000114094	0.000109884	0.000105829	0.000101923	0.000104835	0.000100966	9.72403e-05	9.36519e-05	9.0196e-05
						4.34	2643.61	#REF!	14.2395	14	0	0	0.769444	183.962	236.211	303.301	0.919808	49.2009												236.211	6.34904	71.8632	164.348		3.12		0.000118589	0.000114213	0.000109998	0.000113073	0.0001089	0.000104881	0.000101011	9.72836e-05	0.000100032	9.63409e-05	9.27857e-05	8.93618e-05	8.60642e-05
						4.36	2655.58	#REF!	14.3052	14	0	0	0.769444	184.731	237.199	304.57	0.923655	50.1246												237.199	5.36106	73.5191	163.68		3.14		0.000113227	0.000109049	0.000105025	0.000107928	0.000103945	0.00010011	9.64153e-05	9.28574e-05	9.54526e-05	9.19302e-05	8.85378e-05	8.52706e-05	8.21239e-05
						4.38	2667.46	#REF!	14.3708	14	0	0	0.769444	185.501	238.187	305.839	0.927503	51.0521												238.187	4.37307	75.1969	162.99		3.16		0.000108111	0.000104121	0.000100279	0.000103021	9.92191e-05	9.55577e-05	9.20315e-05	8.86353e-05	9.10856e-05	8.77244e-05	8.44872e-05	8.13694e-05	7.83667e-05
						4.4	2679.27	#REF!	14.4364	14	0	0	0.769444	186.27	239.175	307.107	0.93135	51.9834												239.175	3.38508	76.8968	162.279		3.18		0.000103229	9.94194e-05	9.57506e-05	9.83402e-05	9.47113e-05	9.12163e-05	8.78502e-05	8.46084e-05	8.69218e-05	8.37143e-05	8.0625e-05	7.76498e-05	7.47844e-05
						4.42	2691	#REF!	14.502	14.5	0	0	0.439384	186.709	239.74	307.832	0.933547	52.917												239.74	2.8209	78.6188	161.121		3.2		9.85681e-05	9.49308e-05	9.14277e-05	9.38733e-05	9.04092e-05	8.7073e-05	8.38598e-05	8.07652e-05	8.29495e-05	7.98885e-05	7.69405e-05	7.41012e-05	7.13668e-05
						4.44	2702.65	#REF!	14.5676	14.5	0	0	0.439384	187.149	240.304	308.556	0.935744	53.8527												240.304	2.25672	80.363	159.941		3.22		9.41194e-05	9.06462e-05	8.73012e-05	8.96109e-05	8.63041e-05	8.31193e-05	8.0052e-05	7.7098e-05	7.91603e-05	7.62392e-05	7.34258e-05	7.07162e-05	6.81067e-05
						4.46	2714.23	#REF!	14.6333	14.5	0	0	0.439384	187.588	240.868	309.281	0.937941	54.7906												240.868	1.69254	82.1294	158.739		3.24		8.98732e-05	8.65567e-05	8.33626e-05	8.5544e-05	8.23872e-05	7.9347e-05	7.64189e-05	7.35989e-05	7.55461e-05	7.27584e-05	7.00734e-05	6.74876e-05	6.49972e-05
						4.48	2725.74	#REF!	14.6989	14.5	0	0	0.439384	188.028	241.432	310.005	0.940138	55.7308												241.432	1.12836	83.9182	157.514		3.26		8.58209e-05	8.26539e-05	7.96039e-05	8.1664e-05	7.86504e-05	7.57481e-05	7.29528e-05	7.02607e-05	7.20993e-05	6.94387e-05	6.68762e-05	6.44084e-05	6.20316e-05
						4.5	2737.17	#REF!	14.7645	14.5	0	0	0.439384	188.467	241.996	310.729	0.942334	56.6731												241.996	0.564181	85.7293	156.267		3.28		8.19539e-05	7.89296e-05	7.6017e-05	7.79626e-05	7.50857e-05	7.23149e-05	6.96463e-05	6.70762e-05	6.88122e-05	6.62729e-05	6.38273e-05	6.14719e-05	5.92035e-05
						4.52	2748.53	#REF!	14.8301	14.5	0	0	0.439384	188.906	242.56	311.454	0.944531	57.6176												242.56	0	87.5629	154.998		3.3		7.8264e-05	7.53759e-05	7.25944e-05	7.4432e-05	7.16853e-05	6.904e-05	6.64923e-05	6.40386e-05	6.56777e-05	6.3254e-05	6.09198e-05	5.86718e-05	5.65067e-05
						4.54	2759.82	#REF!	14.8957	14.5	0	0	0	188.906	242.56	311.454	0.944531	58.5622												242.56	0	89.4191	153.141		3.32		7.47406e-05	7.19825e-05	6.93262e-05	7.10617e-05	6.84394e-05	6.59138e-05	6.34815e-05	6.11389e-05	6.26865e-05	6.03732e-05	5.81454e-05	5.59997e-05	5.39332e-05
						4.56	2771.03	#REF!	14.9614	14.5	0	0	0	188.906	242.56	311.454	0.944531	59.5067												242.56	0	91.2978	151.263		3.34		7.13765e-05	6.87426e-05	6.62059e-05	6.78448e-05	6.53412e-05	6.293e-05	6.06078e-05	5.83712e-05	5.98325e-05	5.76245e-05	5.54981e-05	5.34501e-05	5.14777e-05
						4.58	2782.18	#REF!	15.027	15	0	0	0	188.906	242.56	311.454	0.944531	60.4512												242.56	0	93.1991	149.361		3.36		6.81649e-05	6.56495e-05	6.32269e-05	6.47748e-05	6.23845e-05	6.00824e-05	5.78652e-05	5.57299e-05	5.71096e-05	5.50021e-05	5.29724e-05	5.10176e-05	4.9135e-05
						4.6	2793.26	#REF!	15.0926	15	0	0	0	188.906	242.56	311.454	0.944531	61.3958												242.56	0	95.1232	147.437		3.38		6.50993e-05	6.2697e-05	6.03834e-05	6.18452e-05	5.9563e-05	5.7365e-05	5.52481e-05	5.32094e-05	5.4512e-05	5.25004e-05	5.0563e-05	4.86972e-05	4.69001e-05
						4.62	2804.27	#REF!	15.1582	15	0	0	0	188.906	242.56	311.454	0.944531	62.3403												242.56	0	97.0701	145.49		3.4		6.21732e-05	5.98789e-05	5.76692e-05	5.90498e-05	5.68707e-05	5.47721e-05	5.27509e-05	5.08043e-05	5.20342e-05	5.01141e-05	4.82648e-05	4.64837e-05	4.47684e-05
						4.64	2815.21	#REF!	15.2238	15	0	0	0	188.906	242.56	311.454	0.944531	63.2848												242.56	0	99.0398	143.521		3.42		5.93805e-05	5.71892e-05	5.50788e-05	5.63826e-05	5.4302e-05	5.22982e-05	5.03683e-05	4.85096e-05	4.96709e-05	4.78379e-05	4.60726e-05	4.43724e-05	4.2735e-05
						4.66	2826.08	#REF!	15.2895	15	0	0	0	188.906	242.56	311.454	0.944531	64.2294												242.56	0	101.032	141.528		3.44		5.67153e-05	5.46224e-05	5.26067e-05	5.3838e-05	5.18513e-05	4.99379e-05	4.80951e-05	4.63203e-05	4.74168e-05	4.5667e-05	4.39818e-05	4.23588e-05	4.07957e-05
						4.68	2836.89	#REF!	15.3551	15	0	0	0	188.906	242.56	311.454	0.944531	65.1739												242.56	0	103.048	139.512		3.46
						4.7	2847.63	#REF!	15.4207	15	0	0	0	188.906	242.56	311.454	0.944531	66.1184												242.56	0	105.087	137.474		3.48
						4.72	2858.31	#REF!	15.4863	15	0	0	0	188.906	242.56	311.454	0.944531	67.063												242.56	0	107.148	135.412		3.5
						4.74	2868.93	#REF!	15.5519	15.5	0	0	0	188.906	242.56	311.454	0.944531	68.0075												242.56	0	109.233	133.327		3.52
						4.76	2879.48	#REF!	15.6176	15.5	0	0	0	188.906	242.56	311.454	0.944531	68.952												242.56	0	111.341	131.219		3.54
						4.78	2889.97	#REF!	15.6832	15.5	0	0	0	188.906	242.56	311.454	0.944531	69.8965												242.56	0	113.473	129.088		3.56
						4.8	2900.39	#REF!	15.7488	15.5	0	0	0	188.906	242.56	311.454	0.944531	70.8411												242.56	0	115.627	126.933		3.58
						4.82	2910.76	#REF!	15.8144	15.5	0	0	0	188.906	242.56	311.454	0.944531	71.7856																	3.6
						4.84	2921.07	#REF!	15.88	15.5	0	0	0	188.906	242.56	311.454	0.944531	72.7301																	3.62
						4.86	2931.31	#REF!	15.9457	15.5	0	0	0	188.906	242.56	311.454	0.944531	73.6747																	3.64
						4.88	2941.5	#REF!	16.0113	16	0	0	0	188.906	242.56	311.454	0.944531	74.6192																	3.66
						4.9	2951.63	#REF!	16.0769	16	0	0	0	188.906	242.56	311.454	0.944531	75.5637																	3.68
						4.92	2961.7	#REF!	16.1425	16	0	0	0	188.906	242.56	311.454	0.944531	76.5083																	3.7
						4.94	2971.71	#REF!	16.2081	16	0	0	0	188.906	242.56	311.454	0.944531	77.4528																	3.72
						4.96	2981.67	#REF!	16.2738	16	0	0	0	188.906	242.56	311.454	0.944531	78.3973
							0
							0
							0
							0
							0
							0
							0
							0
							0
							0
							0
							0
							0
							0
							0
							0
							0
							0
							0
							0
							0
							0
							0
							0
[truncated: 137 more columns]

## Sheet: Middletown_1
																																					5.14818	4.95823	4.77527	4.59905	4.42934	4.87991	4.0155	3.86732	4.35937	4.1985	4.61432	4.44404	4.28005
																																					0	1	2	3	4	5	6	7	8	9	10	11	12
	INPUTS			ERROR CHECK		Surge height (m)	Wall Length (m)	sum of middleH * dL	Surge height (ft)	Rounding (ft)	delta Area (sq m)	Building numbers	Building Values (million $)	Cum Value	2080	2130	Marginal Damage	Damage	2030	Expected Benefit (million $, PV)	Residual Dam (million $, PV)	Cost (Million $)	Net Benefit (million $, PV)	2080	Expected Benefit (million $, PV)	Residual Dam (million $, PV)	Cost (Million $)	Net Benefit (million $, PV)	2130	Expected Benefit (million $, PV)	Residual Dam (million $, PV)	Cost (million $)	Net Benefit (million $, PV)		Surge height (m)		0	1	2	3	4	5	6	7	8	9	10	11	12
	SPATIAL DATA					1.2	706.947	#REF!	3.9372	3.5	10004.3	0	0	0	0	0	0	0		0	48.5475	0.646997	-0.646997		0	229.769	0.01	-0.01		0	735.197	0.01	-0.01		1.2
	Target City	Middletown				1.22	775.285	#REF!	4.00282	4	1157.63	1.55757	0.272103	0.272103	0.349387	0.448621	0.00136051	0.00136051		0	48.5475	0.782269	-0.782269		0	229.769	0.01	-0.01		0	735.197	0.01	-0.01		1.22		0	0	0	0	0	0	0	0	0	0	0	0	0
	Policy Year (base year: 2020)	#REF!				1.24	869.994	#REF!	4.06844	4	1157.63	1.55757	0.272103	0.544205	0.698773	0.897243	0.00272103	0.00408154		0	48.5475	0.963425	-0.963425		0	229.769	0.01	-0.01		0	735.197	0.01	-0.01		1.24		0	0	0	0	0	0	0	0	0	0	0	0	0
	SLR rate (before policy)	4.17	mm/year			1.26	1029.74	#REF!	4.13406	4	1157.63	1.55757	0.272103	0.816308	1.04816	1.34586	0.00408154	0.00816308		0	48.5475	1.24635	-1.24635		0	229.769	0.0288616	-0.0288616		0	735.197	0.01	-0.01		1.26		0	0	0	0	0	0	0	0	0	0	0	0	0
	SLR rate (after policy)	#REF!	mm/year			1.28	1257.11	#REF!	4.19968	4	1157.63	1.55757	0.272103	1.08841	1.39755	1.79449	0.00544205	0.0136051		0	48.5475	1.65673	-1.65673		0	229.769	0.0582445	-0.0582445		0	735.197	0.01	-0.01		1.28		0	0	0	0	0	0	0	0	0	0	0	0	0
	MHHW	0.74	meter			1.3	1392.21	#REF!	4.2653	4	1157.63	1.55757	0.272103	1.36051	1.74693	2.24311	0.00680257	0.0204077		0	48.5475	1.99086	-1.99086		0	229.769	0.0963576	-0.0963576		0	735.197	0.01	-0.01		1.3		0	0	0	0	0	0	0	0	0	0	0	0	0
						1.32	1477.63	#REF!	4.33092	4	1157.63	1.55757	0.272103	1.63262	2.09632	2.69173	0.00816308	0.0285708		0.541023	48.0065	2.28543	-1.74441		0	229.769	0.14284	-0.14284		0	735.197	0.01	-0.01		1.32		0.116491	0.112192	0.108052	0.104065	0.100224	0	0	0	0	0	0	0	0
						1.34	1541.39	#REF!	4.39654	4	1157.63	1.55757	0.272103	1.90472	2.44571	3.14035	0.00952359	0.0380944		1.7008	46.8467	2.57097	-0.870168		0	229.769	0.198377	-0.198377		0	735.197	0.01	-0.01		1.34		0.12967	0.124885	0.120276	0.115838	0.111563	0.128701	0.103482	0.0996629	0.114973	0.11073	0	0	0
	GEV ESTIMATION					1.36	1593.1	#REF!	4.46216	4	1157.63	1.55757	0.272103	2.17682	2.79509	3.58897	0.0108841	0.0489785		2.17682	46.3707	2.85768	-0.680862		0	229.769	0.263352	-0.263352		0	735.197	0.01	-0.01		1.36		0.139205	0.134068	0.12912	0.124356	0.119767	0.138146	0.11109	0.106991	0.123409	0.118855	0.137113	0.132054	0.127181
	μ (location)	1.572				1.38	1637.04	#REF!	4.52778	4.5	3375.45	4.54163	0.793408	2.97023	3.81385	4.89708	0.0148511	0.0638296		2.97023	45.5773	3.15001	-0.179781		0	229.769	0.338036	-0.338036		0	735.197	0.01	-0.01		1.38		0.1515	0.145909	0.140525	0.135339	0.130345	0.150322	0.120902	0.116441	0.134287	0.129332	0.149179	0.143674	0.138372
	σ (scale)	0.1831				1.4	1675.54	#REF!	4.5934	4.5	3375.45	4.54163	0.793408	3.76364	4.83261	6.20519	0.0188182	0.0826478		3.76364	44.7839	3.45028	0.313362		0	229.769	0.422659	-0.422659		0	735.197	0.01	-0.01		1.4		0.16385	0.157804	0.151981	0.146372	0.140971	0.162545	0.130759	0.125934	0.145206	0.139848	0.161282	0.15533	0.149598
	k (shape)	-0.1136				1.42	1709.98	#REF!	4.65902	4.5	3375.45	4.54163	0.793408	4.55705	5.85136	7.5133	0.0227852	0.105433		4.55705	43.9905	3.75985	0.797194		0	229.769	0.51742	-0.51742		0	735.197	0.01	-0.01		1.42		0.174631	0.168187	0.161981	0.156003	0.150246	0.173199	0.139362	0.134219	0.154724	0.149014	0.171819	0.165479	0.159372
						1.44	1741.26	#REF!	4.72464	4.5	3375.45	4.54163	0.793408	5.35045	6.87012	8.82141	0.0267523	0.132185		5.35045	43.1971	4.07962	1.27083		0	229.769	0.622501	-0.622501		0	735.197	0.01	-0.01		1.44		0.18297	0.176218	0.169715	0.163452	0.157421	0.181418	0.146017	0.140628	0.162066	0.156086	0.17993	0.173291	0.166896
	Coefficients of the cost function					1.46	1770.01	#REF!	4.79026	4.5	3375.45	4.54163	0.793408	6.14386	7.88887	10.1295	0.0307193	0.162905		6.14386	42.4037	4.41021	1.73365		0	229.769	0.738072	-0.738072		0	735.197	1.46197	-1.46197		1.46		0.188507	0.181551	0.174851	0.168399	0.162184	0.186845	0.150435	0.144884	0.166914	0.160755	0.185261	0.178424	0.17184
	coef1	0.48				1.48	1796.67	#REF!	4.85588	4.5	3375.45	4.54163	0.793408	6.93727	8.90763	11.4376	0.0346863	0.197591		6.93727	41.6102	4.75206	2.18521		0	229.769	0.864291	-0.864291		0	735.197	1.33189	-1.33189		1.48		0.19122	0.184163	0.177367	0.170822	0.164518	0.189458	0.1526	0.146969	0.169249	0.163003	0.187788	0.180859	0.174185
	coef2	0.00195521				1.5	1821.58	#REF!	4.9215	4.5	3375.45	4.54163	0.793408	7.73068	9.92639	12.7457	0.0386534	0.236244		7.73068	40.8168	5.10552	2.62516		0	229.769	1.00131	-1.00131		0	735.197	1.20448	-1.20448		1.5		0.191296	0.184237	0.177438	0.17089	0.164584	0.189443	0.152661	0.147028	0.169235	0.16299	0.187698	0.180772	0.174101
	coef3	-1.67966e-06		Buildings exist under MHHW		1.52	1844.99	#REF!	4.98712	4.5	3375.45	4.54163	0.793408	8.52409	10.9451	14.0538	0.0426204	0.278865		8.52409	40.0234	5.47085	3.05323		0	229.769	1.14926	-1.14926		0	735.197	1.08066	-1.08066		1.52		0.189045	0.182069	0.17535	0.16888	0.162648	0.187107	0.150865	0.145298	0.167149	0.16098	0.185295	0.178457	0.171872
	coef4	5.016e-10				1.54	1867.11	#REF!	5.05274	5	2407.96	3.23988	0.565996	9.09008	11.6719	14.987	0.0454504	0.324315		9.09008	39.4574	5.8483	3.24178		0	229.769	1.30828	-1.30828		0	735.197	0.961189	-0.961189		1.54		0.184188	0.177391	0.170845	0.164541	0.158469	0.182176	0.146989	0.141565	0.162744	0.156738	0.180309	0.173655	0.167247
	q	160215				1.56	1888.1	#REF!	5.11836	5	2407.96	3.23988	0.565996	9.65608	12.3986	15.9202	0.0482804	0.372596		9.65608	38.8914	6.23805	3.41803		0	229.769	1.47851	-1.47851		0	735.197	0.846716	-0.846716		1.56		0.177421	0.170874	0.164568	0.158495	0.152647	0.175342	0.141589	0.136364	0.156638	0.150857	0.173426	0.167027	0.160863
	Growth Rate	0.005	%/year			1.58	1908.09	#REF!	5.18398	5	2407.96	3.23988	0.565996	10.2221	13.1254	16.8534	0.0511104	0.423706		10.2221	38.3254	6.64026	3.58181		0	229.769	1.66007	-1.66007		0	735.197	0.737807	-0.737807		1.58		0.169325	0.163076	0.157059	0.151263	0.145681	0.16718	0.135127	0.130141	0.149347	0.143836	0.165221	0.159124	0.153252
	discount rate	0.0426	%/year			1.6	1927.2	#REF!	5.2496	5	2407.96	3.23988	0.565996	10.7881	13.8522	17.7865	0.0539404	0.477646		10.7881	37.7594	7.05508	3.73299		0	229.769	1.85306	-1.85306		0	735.197	0.634958	-0.634958		1.6		0.160378	0.154459	0.14876	0.14327	0.137983	0.158167	0.127987	0.123264	0.141295	0.136081	0.156163	0.150401	0.14485
	useful_life	30	years			1.62	1945.5	#REF!	5.31522	5	2407.96	3.23988	0.565996	11.3541	14.5789	18.7197	0.0567703	0.534417		11.3541	37.1934	7.48265	3.87142		2.79784	226.971	2.05762	0.74022		0	735.197	0.538608	-0.538608		1.62		0.150967	0.145396	0.14003	0.134863	0.129886	0.148686	0.120477	0.116031	0.132826	0.127924	0.146636	0.141225	0.136014
	CapEx	0.005				1.64	1963.09	#REF!	5.38084	5	2407.96	3.23988	0.565996	11.9201	15.3057	19.6529	0.0596003	0.594017		11.9201	36.6275	7.92308	3.99698		11.2738	218.495	2.27384	8.99996		0	735.197	0.449154	-0.449154		1.64		0.1414	0.136182	0.131157	0.126317	0.121655	0.139044	0.112842	0.108678	0.124212	0.119628	0.136943	0.13189	0.127023
	Difference	0.02	meter			1.66	1980.02	#REF!	5.44646	5	2407.96	3.23988	0.565996	12.4861	16.0324	20.586	0.0624303	0.656447		12.4861	36.0615	8.37649	4.10957		16.0324	213.736	2.50185	13.5306		0	735.197	0.366953	-0.366953		1.66		0.131919	0.127051	0.122362	0.117847	0.113498	0.12948	0.105276	0.101391	0.115668	0.1114	0.127323	0.122624	0.118099
	Minimum height where buildings locate	4	ft			1.68	1996.35	#REF!	5.51208	5.5	7622.32	10.2557	1.79165	14.2777	18.3329	23.54	0.0713885	0.727836		14.2777	34.2698	8.84296	5.43474		18.3329	211.436	2.74173	15.5912		0	735.197	0.292329	-0.292329		1.68		0.123748	0.119182	0.114784	0.110548	0.106468	0.121197	0.0987556	0.0951113	0.108269	0.104274	0.118957	0.114567	0.110339
	A factor to account for other damages than buildings	2				1.7	2012.13	#REF!	5.5777	5.5	7622.32	10.2557	1.79165	16.0694	20.6335	26.4939	0.0803468	0.808183		16.0694	32.4782	9.32262	6.74673		20.6335	209.135	2.9936	17.6399		0	735.197	0.225584	-0.225584		1.7		0.11655	0.112249	0.108107	0.104118	0.100275	0.113859	0.0930113	0.089579	0.101714	0.0979601	0.111512	0.107397	0.103434
	Ratio of houses w/ basements	0.3	(1=All have basements; 0=No basements)			1.72	2027.41	#REF!	5.64332	5.5	7622.32	10.2557	1.79165	17.861	22.934	29.4478	0.089305	0.897487		17.861	30.6865	9.81553	8.04546		22.934	206.835	3.25754	19.6764		0	735.197	0.166994	-0.166994		1.72		0.110104	0.106041	0.102128	0.0983594	0.0947297	0.107247	0.0878673	0.0846248	0.0958067	0.0922712	0.10477	0.100904	0.0971806
	Average height of the first floor	0.9	meter			1.74	2042.22	#REF!	5.70894	5.5	7622.32	10.2557	1.79165	19.6526	25.2345	32.4017	0.0982632	0.995751		19.6526	28.8949	10.3218	9.33084		25.2345	204.534	3.53366	21.7008		0	735.197	0.116815	-0.116815		1.74		0.104272	0.100424	0.0967183	0.0931492	0.0897119	0.101223	0.083213	0.0801422	0.0904254	0.0870886	0.098596	0.0949576	0.0914535
	Coastal length 12ft	2598.48				1.76	2056.6	#REF!	5.77456	5.5	7622.32	10.2557	1.79165	21.4443	27.535	35.3556	0.107221	1.10297		21.4443	27.1032	10.8415	10.6028		27.535	202.234	3.82205	23.713		0	735.197	0.0752882	-0.0752882		1.76		0.0989702	0.095318	0.0918006	0.088413	0.0851504	0.0957049	0.0789819	0.0760673	0.085496	0.0823411	0.0929064	0.089478	0.0861761
	OUTPUTS	2030	2080	2130		1.78	2070.58	#REF!	5.84018	5.5	7622.32	10.2557	1.79165	23.2359	29.8355	38.3096	0.11618	1.21915		23.2359	25.3116	11.3747	11.8612		29.8355	199.933	4.1228	25.7127		0	735.197	0.0426374	-0.0426374		1.78		0.0941522	0.0906778	0.0873317	0.084109	0.0810052	0.0906464	0.075137	0.0723643	0.0809771	0.0779889	0.0876557	0.084421	0.0813057
	Optimal Level of Flood Defense	1.78	2.52	3.56		1.8	2084.18	#REF!	5.9058	5.5	7622.32	10.2557	1.79165	25.0276	32.136	41.2635	0.125138	1.34429		25.0276	23.5199	11.9215	13.1061		32.136	197.633	4.43599	27.7		0	735.197	0.0190744	-0.0190744		1.8		0.0897944	0.0864808	0.0832895	0.080216	0.0772558	0.0860238	0.0716593	0.0690149	0.0768475	0.0740117	0.0828206	0.0797643	0.0768209
	Maximum height of Walls					1.2	2094.18	#REF!	3.9372	5.5	7622.32	10.2557	1.79165	26.8192	34.4366	44.2174	0.134096	1.47839		26.8192	21.7283	1.91659	24.9026		34.4366	195.332	0.00119787	34.4354		0	735.197	4.90648	-4.90648		1.2		0.0858866	0.0827172	0.0796648	0.076725	0.0738937	0.081827	0.0685407	0.0660114	0.0730985	0.070401	0.078391	0.0754982	0.0727122
	Average height of Walls	0.98	1.33	1.72		1.22	2104.18	#REF!	4.00282	4	1157.63	1.55757	0.272103	27.0913	34.7859	44.666	0.135457	1.61384		27.0913	21.4562	2.12313	24.9682		34.7859	194.983	0.0108323	34.7751		0	735.197	4.6266	-4.6266		1.22		0.0820396	0.0790122	0.0760965	0.0732883	0.0705839	0.0776875	0.0654706	0.0630546	0.0694005	0.0668395	0.0740155	0.0712842	0.0686537
	Average Elevation of wall	0.8	1.19	1.84		1.24	2114.18	#REF!	4.06844	4	1157.63	1.55757	0.272103	27.3634	35.1353	45.1147	0.136817	1.75066		27.3634	21.1841	2.34123	25.0222		35.1353	194.633	0.0302328	35.1051		0	735.197	4.35352	-4.35352		1.24		0.0783914	0.0754986	0.0727125	0.0700293	0.0674451	0.0737423	0.0625592	0.0602507	0.0658761	0.0634452	0.0698304	0.0672535	0.0647717
	Wall Length	2384.18	2433.6	2743.61		1.26	2124.18	#REF!	4.13406	4	1157.63	1.55757	0.272103	27.6355	35.4847	45.5633	0.138178	1.88884		27.6355	20.912	2.57101	25.0645		35.4847	194.284	0.0595365	35.4252		0	735.197	4.08736	-4.08736		1.26		0.0750345	0.0722656	0.0695989	0.0670305	0.064557	0.0700832	0.0598803	0.0576706	0.0626074	0.060297	0.0659268	0.063494	0.0611509
	Cost of Wall	13.0975	24.6235	46.4275		1.28	2134.18	#REF!	4.19968	4	1157.63	1.55757	0.272103	27.9076	35.8341	46.0119	0.139538	2.02838		27.9076	20.6399	2.81261	25.095		35.8341	193.935	0.0988808	35.7352		0	735.197	3.82828	-3.82828		1.28		0.072027	0.0693691	0.0668092	0.0643438	0.0619694	0.0667679	0.0574802	0.0553591	0.0596457	0.0574446	0.062362	0.0600607	0.0578444
	Expected Benefit	43.8329	224.206	730.349		1.3	2144.18	#REF!	4.2653	4	1157.63	1.55757	0.272103	28.1797	36.1835	46.4605	0.140899	2.16927		28.1797	20.3678	3.06618	25.1136		36.1835	193.585	0.148403	36.0351		0	735.197	3.57639	-3.57639		1.3		0.0694011	0.0668401	0.0643736	0.061998	0.0597102	0.0638284	0.0553847	0.0533409	0.0570198	0.0549156	0.0591679	0.0569845	0.0548817
	Net Benefit	30.7355	199.582	683.922		1.32	2154.18	#REF!	4.33092	4	1157.63	1.55757	0.272103	28.4518	36.5329	46.9091	0.142259	2.31153		28.4518	20.0957	3.33184	25.12		36.5329	193.236	0.20824	36.3246		0	735.197	3.33184	-3.33184		1.32		0.0671702	0.0646915	0.0623043	0.0600051	0.0577908	0.061278	0.0536043	0.0516262	0.0547415	0.0527214	0.0563576	0.0542779	0.0522749
	Residual Damage	4.71458	5.56284	4.84799		1.34	2164.18	#REF!	4.39654	4	1157.63	1.55757	0.272103	28.7239	36.8823	47.3578	0.14362	2.45515		28.7239	19.8236	3.60975	25.1142		36.8823	192.886	0.27853	36.6037		0	735.197	3.09478	-3.09478		1.34		0.0653339	0.0629229	0.060601	0.0583647	0.0562109	0.0591164	0.0521389	0.0502148	0.0528104	0.0508616	0.0539307	0.0519405	0.0500238
	Expected Damage	48.5475	229.769	735.197		1.36	2174.18	#REF!	4.46216	4	1157.63	1.55757	0.272103	28.996	37.2317	47.8064	0.14498	2.60013		28.996	19.5515	3.90003	25.096		37.2317	192.537	0.359409	36.8722		0	735.197	2.86533	-2.86533		1.36		0.0639052	0.0615469	0.0592757	0.0570884	0.0549817	0.0573335	0.0509987	0.0491168	0.0512177	0.0493276	0.0518773	0.0499629	0.0481192
						1.38	2184.18	#REF!	4.52778	4.5	3375.45	4.54163	0.793408	29.7895	38.2504	49.1145	0.148947	2.74908		29.7895	18.7581	4.20282	25.5866		38.2504	191.518	0.451016	37.7994		0	735.197	2.64363	-2.64363		1.38		0.0620782	0.0597874	0.0575812	0.0554563	0.0534099	0.0559861	0.0495407	0.0477126	0.0500141	0.0481684	0.0502288	0.0483752	0.0465901
						1.4	2194.18	#REF!	4.5934	4.5	3375.45	4.54163	0.793408	30.5829	39.2692	50.4226	0.152914	2.90199		30.5829	17.9647	4.51826	26.0646		39.2692	190.499	0.553486	38.7157		0	735.197	2.42982	-2.42982		1.4		0.0599124	0.0577016	0.0555723	0.0535215	0.0515465	0.0543002	0.0478124	0.046048	0.0485079	0.0467179	0.0489714	0.0471642	0.0454238
	Surge height (ft)	Area submerged (sq m)	delta Area (sq m)	Building numbers	Building Values (million $)	1.42	2204.18	#REF!	4.65902	4.5	3375.45	4.54163	0.793408	31.3763	40.2879	51.7307	0.156881	3.05888		31.3763	17.1712	4.84648	26.5298		40.2879	189.481	0.666958	39.621		0	735.197	2.22404	-2.22404		1.42		0.0574672	0.0553466	0.0533042	0.0513372	0.0494427	0.0523281	0.045861	0.0441686	0.0467462	0.0450212	0.0474263	0.0456762	0.0439906
0.9144	3	5737	0	0	0	1.44	2214.18	#REF!	4.72464	4.5	3375.45	4.54163	0.793408	32.1697	41.3067	53.0388	0.160848	3.21972		32.1697	16.3778	5.18763	26.982		41.3067	188.462	0.791569	40.5151		0	735.197	2.02642	-2.02642		1.44		0.0548006	0.0527783	0.0508307	0.0489549	0.0471484	0.0501221	0.0437329	0.0421191	0.0447756	0.0431233	0.0456399	0.0439557	0.0423336
1.0668	3.5	15741.3	10004.3	0	0	1.46	2224.18	#REF!	4.79026	4.5	3375.45	4.54163	0.793408	32.9631	42.3254	54.3469	0.164815	3.38454		32.9631	15.5844	5.54184	27.4212		42.3254	187.443	0.927456	41.398		0	735.197	1.8371	-1.8371		1.46		0.0519676	0.0500499	0.048203	0.0464242	0.044711	0.047733	0.0414721	0.0399417	0.0426413	0.0410677	0.0436579	0.0420469	0.0404953
1.2192	4	34263.3	18522	24.9212	4.35364	1.48	2234.18	#REF!	4.85588	4.5	3375.45	4.54163	0.793408	33.7565	43.3442	55.655	0.168782	3.55332		33.7565	14.791	5.90925	27.8472		43.3442	186.424	1.07476	42.2694		0	735.197	1.65622	-1.65622		1.48		0.0490198	0.0472109	0.0454687	0.0437908	0.0421748	0.0452085	0.0391196	0.037676	0.0403861	0.0388958	0.0415247	0.0399923	0.0385165
1.3716	4.5	88270.5	54007.2	72.6661	12.6945	1.5	2244.18	#REF!	4.9215	4.5	3375.45	4.54163	0.793408	34.5499	44.3629	56.9632	0.172749	3.72607		34.5499	13.9976	6.28999	28.2599		44.3629	185.406	1.23361	43.1293		0	735.197	1.48392	-1.48392		1.5		0.0460041	0.0443065	0.0426715	0.0410968	0.0395803	0.0425932	0.036713	0.0353582	0.0380498	0.0366457	0.0392816	0.0378321	0.036436
1.524	5	121982	33711.4	45.3583	7.92395	1.52	2254.18	#REF!	4.98712	4.5	3375.45	4.54163	0.793408	35.3433	45.3817	58.2713	0.176717	3.90279		35.3433	13.2042	6.6842	28.6591		45.3817	184.387	1.40415	43.9776		0	735.197	1.32034	-1.32034		1.52		0.0429627	0.0413773	0.0398504	0.0383798	0.0369635	0.0399276	0.0342858	0.0330206	0.0356685	0.0343522	0.0369672	0.0356031	0.0342893
1.6764	5.5	243939	121957	164.092	28.6663	1.54	2264.18	#REF!	5.05274	5	2407.96	3.23988	0.565996	35.9093	46.1085	59.2044	0.179547	4.08233		35.9093	12.6382	7.09203	28.8173		46.1085	183.66	1.58651	44.5219		0	735.197	1.1656	-1.1656		1.54		0.0399216	0.0384484	0.0370296	0.0356631	0.0343471	0.0372373	0.0318589	0.0306833	0.0332651	0.0320376	0.0346066	0.0333296	0.0320996
1.8288	6	473679	229740	309.112	54.0009	1.56	2274.18	#REF!	5.11836	5	2407.96	3.23988	0.565996	36.4753	46.8352	60.1376	0.182376	4.26471		36.4753	12.0722	7.5136	28.9617		46.8352	182.933	1.78084	45.0544		0	735.197	1.01985	-1.01985		1.56		0.0369168	0.0355545	0.0342425	0.0329789	0.0317619	0.0345575	0.029461	0.0283738	0.0308712	0.029732	0.0322338	0.0310443	0.0298987
1.9812	6.5	615672	141993	191.05	33.3758	1.58	2284.18	#REF!	5.18398	5	2407.96	3.23988	0.565996	37.0413	47.562	61.0708	0.185206	4.44992		37.0413	11.5062	7.94906	29.0922		47.562	182.207	1.98726	45.5747		0	735.197	0.883228	-0.883228		1.58		0.0339786	0.0327247	0.0315171	0.0303541	0.029234	0.0319183	0.0271162	0.0261156	0.0285135	0.0274613	0.0298784	0.0287758	0.0277139
2.1336	7	739068	123396	166.028	29.0046	1.6	2294.18	#REF!	5.2496	5	2407.96	3.23988	0.565996	37.6073	48.2887	62.0039	0.188036	4.63795		37.6073	10.9402	8.39853	29.2088		48.2887	181.48	2.20593	46.0828		0	735.197	0.755868	-0.755868		1.6		0.0311321	0.0299832	0.0288768	0.0278112	0.0267849	0.0293449	0.0248446	0.0239277	0.0262147	0.0252473	0.0275655	0.0265483	0.0255686
2.286	7.5	1.22891e+06	489842	659.078	115.139	1.62	2304.18	#REF!	5.31522	5	2407.96	3.23988	0.565996	38.1733	49.0155	62.9371	0.190866	4.82882		38.1733	10.3742	8.86217	29.3111		49.0155	180.753	2.43697	46.5785		0	735.197	0.637908	-0.637908		1.62		0.0283972	0.0273493	0.0263401	0.0253681	0.0244319	0.0268581	0.022662	0.0218258	0.0239931	0.0231077	0.0253163	0.0243821	0.0234823
2.4384	8	1.49786e+06	268949	361.868	63.2171	1.64	2314.18	#REF!	5.38084	5	2407.96	3.23988	0.565996	38.7393	49.7422	63.8703	0.193696	5.02252		38.7393	9.80823	9.3401	29.3992		49.7422	180.026	2.68051	47.0617		0	735.197	0.529484	-0.529484		1.64		0.0257896	0.0248379	0.0239213	0.0230386	0.0221884	0.0244742	0.0205811	0.0198216	0.0218635	0.0210567	0.0231477	0.0222935	0.0214709
2.5908	8.5	1.67704e+06	179176	241.08	42.1158	1.66	2324.18	#REF!	5.44646	5	2407.96	3.23988	0.565996	39.3053	50.469	64.8035	0.196526	5.21904		39.3053	9.24223	9.83247	29.4728		50.469	179.3	2.93671	47.5323		0	735.197	0.430736	-0.430736		1.66		0.0233206	0.0224601	0.0216312	0.020833	0.0200642	0.0222058	0.0186107	0.017924	0.0198371	0.0191051	0.0210732	0.0202956	0.0195466
2.7432	9	1.86083e+06	183790	247.287	43.2003	1.68	2334.18	#REF!	5.51208	5.5	7622.32	10.2557	1.79165	41.0969	52.7695	67.7574	0.205485	5.42453		40.2351	8.31238	10.3394	29.8957		52.7695	176.999	3.2057	49.5638		36.4652	698.732	0.341799	36.1234		1.68		0.0210219	0.0202461	0.019499	0.0187795	0.0180865	0.0200846	0.0167763	0.0161572	0.0179422	0.0172801	0.0191245	0.0184188	0.0177391
2.8956	9.5	2025333	164508	221.343	38.6679	1.7	2344.18	#REF!	5.5777	5.5	7622.32	10.2557	1.79165	42.8886	55.07	70.7113	0.214443	5.63897		41.0902	7.45734	10.8611	30.2291		55.07	174.699	3.48761	51.5824		55.07	680.127	0.262811	54.8072		1.7		0.0188884	0.0181913	0.0175201	0.0168735	0.0162509	0.0181077	0.0150736	0.0145174	0.0161761	0.0155792	0.0173003	0.0166619	0.0160471
3.048	10	2182013	156680	210.811	36.828	1.72	2354.18	#REF!	5.64332	5.5	7622.32	10.2557	1.79165	44.6802	57.3705	73.6652	0.223401	5.86237		41.8738	6.67368	11.3975	30.4763		57.3705	172.398	3.78257	53.588		57.3705	677.827	0.193909	57.1766		1.72		0.0169145	0.0162904	0.0156892	0.0151103	0.0145527	0.0162712	0.0134984	0.0130003	0.0145356	0.0139992	0.0155987	0.0150231	0.0144687
3.2004	10.5	2.33491e+06	152901	205.726	35.9397	1.74	2364.18	#REF!	5.70894	5.5	7622.32	10.2557	1.79165	46.4719	59.6711	76.6191	0.232359	6.09473		42.5897	5.9578	11.949	30.6407		59.6711	170.098	4.09074	55.5803		59.6711	675.526	0.135231	59.5358		1.74		0.0150945	0.0145375	0.014001	0.0134844	0.0129868	0.0145712	0.012046	0.0116015	0.0130168	0.0125365	0.014017	0.0134997	0.0130016
3.3528	11	2.47607e+06	141156	189.924	33.1791	1.76	2374.18	#REF!	5.77456	5.5	7622.32	10.2557	1.79165	48.2635	61.9716	79.5731	0.241318	6.33605		43.2415	5.30602	12.5156	30.7259		61.9716	167.797	4.41224	57.5593		61.9716	673.226	0.086914	61.8847		1.76		0.013422	0.0129267	0.0124497	0.0119903	0.0115478	0.0130028	0.0107112	0.010316	0.0116157	0.0111871	0.0125519	0.0120887	0.0116426
3.5052	11.5	2.62014e+06	144066	193.839	33.863	1.78	2384.18	#REF!	5.84018	5.5	7622.32	10.2557	1.79165	50.0552	64.2721	82.527	0.250276	6.58632		43.8329	4.71458	13.0975	30.7355		64.2721	165.497	4.74722	59.5249		64.2721	670.925	0.049095	64.223		1.78		0.0118904	0.0114516	0.0110291	0.0106221	0.0102301	0.011561	0.009489	0.00913884	0.0103278	0.00994664	0.0111999	0.0107866	0.0103885
3.6576	12	2.72039e+06	100255	134.892	23.5652	1.8	2394.18	#REF!	5.9058	5.5	7622.32	10.2557	1.79165	51.8468	66.5726	85.4809	0.259234	6.84556		44.3678	4.17973	13.6947	30.6731		66.5726	163.196	5.0958	61.4768		66.5726	668.625	0.0219115	66.5507		1.8		0.010493	0.0101058	0.00973287	0.0093737	0.0090278	0.0102404	0.0083738	0.0080648	0.00914802	0.00881044	0.00995664	0.00958922	0.00923536
3.81	12.5	2.82316e+06	102773	138.28	24.1571	1.82	2404.18	#REF!	5.97142	5.5	7622.32	10.2557	1.79165	53.6384	68.8731	88.4348	0.268192	7.11375		44.8498	3.6977	14.3075	30.5423		68.8731	160.896	5.45813	63.415		68.8731	666.324	0.00550076	68.8676		1.82		0.00922274	0.0088824	0.00855463	0.00823894	0.00793491	0.00903529	0.00736009	0.00708849	0.00807149	0.00777364	0.00881776	0.00849236	0.00817898
3.9624	13	2.90969e+06	86524.4	116.418	20.3378	1.84	2414.18	#REF!	6.03704	6	28717.5	38.639	6.75011	60.3886	77.5404	99.5639	0.301943	7.41569		45.2842	3.26334	14.9359	30.3482		77.5404	152.228	5.83435	71.7061		77.5404	657.657	2.72337e-30	77.5404		1.84		0.00809961	0.00780072	0.00751286	0.00723562	0.00696861	0.00796647	0.00646379	0.00622526	0.00711668	0.00685406	0.00780455	0.00751655	0.00723917
4.1148	13.5	3.02569e+06	116000	156.077	27.2662	1.86	2424.18	#REF!	6.10266	6	28717.5	38.639	6.75011	67.1387	86.2078	110.693	0.335693	7.75139		45.6753	2.87217	15.5802	30.0952		86.2078	143.561	6.22459	79.9832		86.2078	648.99	0.00554652	86.2022		1.86		0.00710336	0.00684123	0.00658877	0.00634564	0.00611147	0.00701527	0.00566874	0.00545955	0.00626695	0.00603568	0.00689995	0.00664533	0.0064001
4.2672	14	3.13853e+06	112843	151.829	26.524	1.88	2434.18	#REF!	6.16828	6	28717.5	38.639	6.75011	73.8888	94.8751	121.822	0.369444	8.12083		46.0273	2.52026	16.2404	29.7869		94.8751	134.894	6.62898	88.2461		94.8751	640.322	0.0222776	94.8528		1.88		0.00621742	0.00598799	0.00576702	0.00555421	0.00534925	0.00616648	0.00496174	0.00477864	0.0055087	0.00530541	0.00609001	0.00586528	0.00564884
4.4196	14.5	3.26738e+06	128849	173.364	30.2862	1.9	2444.18	#REF!	6.2339	6	28717.5	38.639	6.75011	80.6389	103.542	132.951	0.403194	8.52403		46.3434	2.20414	16.9167	29.4267		103.542	126.226	7.04768	96.4947		103.542	631.655	0.0503306	103.492		1.9		0.00542827	0.00522796	0.00503503	0.00484923	0.00467029	0.00540764	0.00433196	0.0041721	0.0048308	0.00465253	0.00536333	0.00516541	0.00497479
4.572	15	3.38168e+06	114302	153.792	26.867	1.92	2454.18	#REF!	6.29952	6	28717.5	38.639	6.75011	87.389	112.21	144.08	0.436945	8.96097		46.6268	1.92072	17.6092	29.0176		112.21	117.559	7.4808	104.729		112.21	622.988	0.0898426	112.12		1.92		0.00472474	0.00455039	0.00438247	0.00422075	0.00406499	0.00472851	0.00377052	0.00363138	0.00422412	0.00406824	0.00471054	0.00453671	0.0043693
4.7244	15.5	3.52661e+06	144924	194.994	34.0648	1.94	2464.18	#REF!	6.36514	6	28717.5	38.639	6.75011	94.1391	120.877	155.209	0.470696	9.43167		46.8803	1.66718	18.318	28.5623		120.877	108.892	7.9285	112.949		120.877	614.32	0.140951	120.736		1.94		0.00409758	0.00394637	0.00380074	0.00366049	0.00352541	0.00412063	0.00327002	0.00314935	0.00368108	0.00354524	0.00412392	0.00397174	0.00382518
4.8768	16	3.62046e+06	93858.2	126.285	22.0616	1.96	2474.18	#REF!	6.43076	6	28717.5	38.639	6.75011	100.889	129.544	166.338	0.504446	9.93611		47.1065	1.44098	19.0433	28.0632		129.544	100.224	8.3909	121.153		129.544	605.653	0.203793	129.341		1.96		0.00353904	0.00340844	0.00328266	0.00316153	0.00304486	0.00357691	0.00282429	0.00272006	0.00319536	0.00307745	0.00359703	0.0034643	0.00333646
5.0292	16.5	3.69926e+06	78797.3	106.021	18.5215	1.98	2484.18	#REF!	6.49638	6	28717.5	38.639	6.75011	107.639	138.212	177.467	0.538197	10.4743		47.3077	1.23979	19.7853	27.5224		137.655	92.1133	8.86816	128.787		138.212	596.986	0.278506	137.933		1.98		0.0030425	0.00293023	0.0028221	0.00271795	0.00261766	0.00309134	0.00242803	0.00233843	0.00276159	0.00265968	0.00312442	0.00300913	0.00289808
5.1816	17	3.78731e+06	88052.8	118.474	20.697	2	2203.81	#REF!	6.562	6.5	20284.7	27.2929	4.76798	112.407	144.334	185.328	0.562037	11.0363		47.4859	1.06158	18.1524	29.3336		144.334	85.4348	8.27068	136.063		144.334	590.863	0.322709	144.011		2		0.0025999	0.00250396	0.00241156	0.00232257	0.00223686	0.00265634	0.00207482	0.00199825	0.00237298	0.00228542	0.00269898	0.00259938	0.00250346
5.334	17.5	3.85214e+06	64829.1	87.2269	15.2382	2.02	2214.46	#REF!	6.62762	6.5	20284.7	27.2929	4.76798	117.175	150.456	193.189	0.585876	11.6222		47.6431	0.904437	18.8532	28.7899		150.456	79.3126	8.72611	141.73		150.456	584.741	0.410402	150.046		2.02		0.00220755	0.00212609	0.00204763	0.00197207	0.0018993	0.00226868	0.00176171	0.0016967	0.00202668	0.00195189	0.00231793	0.00223239	0.00215001
5.4864	18	3.90588e+06	53735	72.2999	12.6305	2.04	2224.92	#REF!	6.69324	6.5	20284.7	27.2929	4.76798	121.943	156.578	201.05	0.609716	12.2319		47.781	0.76649	19.5683	28.2127		156.578	73.1904	9.19493	147.383		156.578	578.619	0.509062	156.069		2.04		0.00186179	0.00179308	0.00172692	0.00166319	0.00160181	0.00192517	0.00148578	0.00143095	0.00171981	0.00165635	0.00197848	0.00190547	0.00183516
						2.06	2235.19	#REF!	6.75886	6.5	20284.7	27.2929	4.76798	126.711	162.7	208.912	0.633556	12.8655		47.9015	0.645967	20.2979	27.6036		162.46	67.3083	9.67719	152.783		162.7	572.497	0.618808	162.082		2.06		0.001559	0.00150147	0.00144606	0.0013927	0.00134131	0.00162261	0.00124414	0.00119823	0.00144952	0.00139603	0.00167785	0.00161593	0.0015563
		2030	2080	2130		2.08	2245.28	#REF!	6.82448	6.5	20284.7	27.2929	4.76798	131.479	168.823	216.773	0.657396	13.5229		48.0063	0.54118	21.042	26.9643		167.911	61.8577	10.173	157.738		168.823	566.375	0.739758	168.083		2.08		0.00129563	0.00124782	0.00120177	0.00115742	0.00111471	0.00135782	0.00103396	0.000995805	0.00121298	0.00116822	0.00141322	0.00136107	0.00131084
	12 ft wall	4.46	4.85	5.5		2.1	2255.21	#REF!	6.8901	6.5	20284.7	27.2929	4.76798	136.247	174.945	224.634	0.681236	14.2041		48.097	0.450533	21.8006	26.2964		172.968	56.8008	10.6823	162.286		174.945	560.252	0.872025	174.073		2.1		0.00106817	0.00102875	0.000990785	0.000954223	0.000919011	0.00112766	0.000852436	0.000820979	0.00100737	0.000970197	0.00118179	0.00113818	0.00109618
	Length	2940.64	3014.31	3125.86		2.12	2264.97	#REF!	6.95572	6.5	20284.7	27.2929	4.76798	141.015	181.067	232.495	0.705076	14.9092		48.175	0.372528	22.5738	25.6011		177.664	52.1042	11.2053	166.459		181.067	554.13	1.01572	180.051		2.12		0.000873198	0.000840976	0.000809942	0.000780054	0.000751268	0.000929033	0.000696845	0.00067113	0.000829932	0.000799306	0.000980778	0.000944585	0.000909728
	Cost	233.514	239.364	248.222		2.14	2274.57	#REF!	7.02134	7	15424.5	20.7535	3.62557	144.641	185.722	238.472	0.723204	15.6324		48.2417	0.305785	23.3617	24.88		182.031	47.7382	11.742	170.289		185.722	549.475	1.17095	184.551		2.14		0.000707162	0.000681067	0.000655934	0.000631729	0.000608417	0.000758642	0.000564342	0.000543517	0.000677717	0.000652708	0.000807151	0.000777366	0.00074868
						2.16	2284.02	#REF!	7.08696	7	15424.5	20.7535	3.62557	148.266	190.378	244.45	0.741332	16.3737		48.2985	0.249015	24.1643	24.1342		186.091	43.6774	12.2925	173.799		190.378	544.82	1.33781	189.04		2.16		0.000567063	0.000546138	0.000525984	0.000506574	0.000487881	0.000613753	0.000452538	0.000435838	0.000548284	0.000528051	0.000658433	0.000634136	0.000610735
						2.18	2293.33	#REF!	7.15258	7	15424.5	20.7535	3.62557	151.892	195.033	250.427	0.759459	17.1332		48.3465	0.201018	24.9816	23.3649		189.868	39.9008	12.8568	177.011		195.033	540.164	1.51642	193.517		2.18		0.000449985	0.000433379	0.000417387	0.000401984	0.00038715	0.000491671	0.000359104	0.000345853	0.000439224	0.000423016	0.000532154	0.000512516	0.000493603
						2.2	2302.49	#REF!	7.2182	7	15424.5	20.7535	3.62557	155.517	199.688	256.405	0.777587	17.9108		48.3868	0.160689	25.8137	22.5731		193.379	36.3893	13.435	179.944		199.688	535.509	1.70687	197.982		2.2		0.000353129	0.000340098	0.000327547	0.00031546	0.000303819	0.000389786	0.00028181	0.000271411	0.000348207	0.000335358	0.000425896	0.00041018	0.000395043
						2.22	2311.53	#REF!	7.28382	7	15424.5	20.7535	3.62557	159.143	204.344	262.383	0.795715	18.7065		48.4205	0.127017	26.6607	21.7598		196.643	33.1255	14.0271	182.616		204.344	530.854	1.90925	202.434		2.22		0.000273854	0.000263748	0.000254015	0.000244642	0.000235614	0.000305607	0.000218545	0.000210481	0.000273008	0.000262933	0.000337332	0.000324883	0.000312895
						2.24	2320.43	#REF!	7.34944	7	15424.5	20.7535	3.62557	162.769	208.999	268.36	0.813843	19.5203		48.4484	0.0990883	27.5226	20.9258		199.675	30.0939	14.6333	185.041		208.999	526.198	2.12366	206.875		2.24		0.000209698	0.00020196	0.000194507	0.000187329	0.000180416	0.000236792	0.000167347	0.000161171	0.000211533	0.000203727	0.000264248	0.000254496	0.000245105
						2.26	2329.21	#REF!	7.41506	7	15424.5	20.7535	3.62557	166.394	213.654	274.338	0.831971	20.3523		48.4714	0.0760782	28.3994	20.072		202.487	27.2818	15.2536	187.233		213.654	521.543	2.35019	211.304		2.26		0.000158398	0.000152553	0.000146924	0.000141502	0.00013628	0.000181164	0.000126408	0.000121743	0.000161839	0.000155867	0.000204571	0.000197022	0.000189752
						2.28	2337.86	#REF!	7.48068	7	15424.5	20.7535	3.62557	170.02	218.31	280.315	0.850099	21.2024		48.4903	0.0572526	29.2913	19.199		205.091	24.6779	15.888	189.203		218.31	516.888	2.58893	215.721		2.28		0.000117903	0.000113553	0.000109362	0.000105327	0.00010144	0.000136734	9.40913e-05	9.06192e-05	0.000122148	0.000117641	0.000156386	0.000150615	0.000145057
						2.3	2346.4	#REF!	7.5463	7.5	69977.5	94.154	16.4484	186.468	239.43	307.434	0.932341	22.1348		48.5056	0.0419169	30.1982	18.3074		207.504	22.265	16.5365	190.967		239.43	495.767	2.83997	236.59		2.3		8.66268e-05	8.34301e-05	8.03514e-05	7.73863e-05	7.45306e-05	0.000101993	6.91314e-05	6.65803e-05	9.11129e-05	8.77507e-05	0.000118282	0.000113917	0.000109713
						2.32	2354.83	#REF!	7.61192	7.5	69977.5	94.154	16.4484	202.917	260.55	334.553	1.01458	23.1493		48.518	0.0294856	31.1202	17.3978		209.74	20.0289	17.1994	192.54		260.55	474.647	3.1034	257.447		2.32		6.27144e-05	6.04001e-05	5.81712e-05	5.60246e-05	5.39572e-05	7.50704e-05	5.00484e-05	4.82015e-05	6.70626e-05	6.45878e-05	8.83863e-05	8.51247e-05	8.19834e-05
						2.34	2363.15	#REF!	7.67754	7.5	69977.5	94.154	16.4484	219.365	281.67	361.672	1.09682	24.2462		48.5281	0.0194644	32.0574	16.4707		211.809	17.9601	17.8765	193.932		281.67	453.527	3.3793	278.291		2.34		4.46506e-05	4.30029e-05	4.14161e-05	3.98877e-05	3.84158e-05	5.44282e-05	3.56329e-05	3.43179e-05	4.86223e-05	4.68281e-05	6.51517e-05	6.27475e-05	6.0432e-05
						2.36	2371.36	#REF!	7.74316	7.5	69977.5	94.154	16.4484	235.813	302.79	388.79	1.17907	25.4252		48.5361	0.0114357	33.0098	15.5263		213.719	16.0498	18.568	195.151		302.79	432.407	3.66775	299.123		2.36		3.11955e-05	3.00443e-05	2.89356e-05	2.78678e-05	2.68395e-05	3.87974e-05	2.48951e-05	2.39765e-05	3.46588e-05	3.33798e-05	4.72932e-05	4.5548e-05	4.38672e-05
						2.38	2379.47	#REF!	7.80878	7.5	69977.5	94.154	16.4484	252.262	323.91	415.909	1.26131	26.6865		48.5425	0.00504673	33.9774	14.5651		215.479	14.2894	19.2739	196.205		323.91	411.287	3.96884	319.942		2.38		2.1335e-05	2.05477e-05	1.97894e-05	1.90592e-05	1.83559e-05	2.71314e-05	1.70261e-05	1.63978e-05	2.42372e-05	2.33428e-05	3.37429e-05	3.24977e-05	3.12985e-05
						2.4	2387.48	#REF!	7.8744	7.5	69977.5	94.154	16.4484	268.71	345.031	443.028	1.34355	28.0301		48.5475	0	34.9603	13.5872		217.098	12.6709	19.9943	197.103		345.031	390.167	4.28264	340.748		2.4		1.42433e-05	1.37177e-05	1.32115e-05	1.2724e-05	1.22544e-05	1.85685e-05	1.13667e-05	1.09472e-05	1.65878e-05	1.59757e-05	2.36133e-05	2.27419e-05	2.19027e-05
						2.42	2395.39	#REF!	7.94002	7.5	69977.5	94.154	16.4484	285.158	366.151	470.147	1.42579	29.4559							218.582	11.1865	20.7292	197.853		366.151	369.047	4.60923	361.541		2.42		9.25189e-06	8.91048e-06	8.58167e-06	8.26499e-06	7.96e-06	1.24025e-05	7.38336e-06	7.1109e-06	1.10796e-05	1.06707e-05	1.61688e-05	1.55721e-05	1.49975e-05
						2.44	2403.21	#REF!	8.00564	8	33618.6	45.2335	7.90214	293.061	376.297	483.175	1.4653	30.9212							219.938	9.8307	21.4787	198.459		376.297	358.9	4.94869	371.349		2.44		5.81685e-06	5.6022e-06	5.39547e-06	5.19636e-06	5.00461e-06	8.04762e-06	4.64206e-06	4.47076e-06	7.18917e-06	6.92388e-06	1.07882e-05	1.03901e-05	1.00067e-05
						2.46	2410.94	#REF!	8.07126	8	33618.6	45.2335	7.90214	300.963	386.444	496.204	1.50481	32.426							221.171	8.59717	22.2428	198.929		386.444	348.753	5.30109	381.143		2.46		3.52437e-06	3.39431e-06	3.26906e-06	3.14842e-06	3.03224e-06	5.0545e-06	2.81258e-06	2.70879e-06	4.51533e-06	4.34871e-06	6.9929e-06	6.73485e-06	6.48632e-06
						2.48	2418.58	#REF!	8.13688	8	33618.6	45.2335	7.90214	308.865	396.59	509.232	1.54432	33.9703							222.289	7.47931	23.0216	199.268		396.59	338.607	5.66652	390.924		2.48		0	0	0	0	0	3.05943e-06	0	0	2.73308e-06	2.63222e-06	4.3877e-06	4.22578e-06	4.06985e-06
						2.5	2426.13	#REF!	8.2025	8	33618.6	45.2335	7.90214	316.767	406.737	522.261	1.58384	35.5542							223.298	6.47021	23.8151	199.483		406.737	328.46	6.04503	400.692		2.5		0	0	0	0	0	0	0	0	0	0	2.65328e-06	2.55537e-06	2.46107e-06
						2.52	2433.6	#REF!	8.26812	8	33618.6	45.2335	7.90214	324.669	416.883	535.289	1.62335	37.1775							224.206	5.56284	24.6235	199.582		416.883	318.314	6.4367	410.447		2.52		0	0	0	0	0	0	0	0	0	0	0	0	0
						2.54	2440.99	#REF!	8.33374	8	33618.6	45.2335	7.90214	332.571	427.03	548.317	1.66286	38.8404							225.019	4.75007	25.4466	199.572		427.03	308.167	6.84161	420.188		2.54		0	0	0	0	0	0	0	0	0	0	0	0	0
						2.56	2448.3	#REF!	8.39936	8	33618.6	45.2335	7.90214	340.473	437.177	561.346	1.70237	40.5427							225.744	4.02486	26.2846	199.459		437.177	298.021	7.25982	429.917		2.56		0	0	0	0	0	0	0	0	0	0	0	0	0
						2.58	2455.53	#REF!	8.46498	8	33618.6	45.2335	7.90214	348.376	447.323	574.374	1.74188	42.2846							226.388	3.38027	27.1376	199.251		447.323	287.874	7.6914	439.632		2.58		0	0	0	0	0	0	0	0	0	0	0	0	0
						2.6	2462.69	#REF!	8.5306	8.5	22397	30.135	5.26448	353.64	454.083	583.054	1.7682	44.0528							226.959	2.80973	28.0056	198.953		454.083	281.114	8.13642	445.946		2.6		0	0	0	0	0	0	0	0	0	0	0	0	0
						2.62	2469.78	#REF!	8.59622	8.5	22397	30.135	5.26448	358.905	460.843	591.733	1.79452	45.8473							227.462	2.30684	28.8886	198.573		460.843	274.355	8.59494	452.248		2.62		0	0	0	0	0	0	0	0	0	0	0	0	0
						2.64	2476.79	#REF!	8.66184	8.5	22397	30.135	5.26448	364.169	467.602	600.413	1.82084	47.6682							227.903	1.86542	29.7866	198.117		467.602	267.595	9.06703	458.535		2.64		0	0	0	0	0	0	0	0	0	0	0	0	0
						2.66	2483.73	#REF!	8.72746	8.5	22397	30.135	5.26448	369.433	474.362	609.093	1.84717	49.5153							228.289	1.47959	30.6998	197.589		474.362	260.835	9.55276	464.809		2.66		0	0	0	0	0	0	0	0	0	0	0	0	0
						2.68	2490.61	#REF!	8.79308	8.5	22397	30.135	5.26448	374.698	481.122	617.772	1.87349	51.3888							228.625	1.14376	31.6282	196.997		481.122	254.076	10.0522	471.069		2.68		0	0	0	0	0	0	0	0	0	0	0	0	0
						2.7	2497.42	#REF!	8.8587	8.5	22397	30.135	5.26448	379.962	487.881	626.452	1.89981	53.2886							228.916	0.852695	32.5718	196.344		487.881	247.316	10.5654	477.316		2.7		0	0	0	0	0	0	0	0	0	0	0	0	0
						2.72	2504.16	#REF!	8.92432	8.5	22397	30.135	5.26448	385.227	494.641	635.132	1.92613	55.2148							229.14	0.628659	33.5306	195.609		494.641	240.556	11.0924	483.549		2.72		0	0	0	0	0	0	0	0	0	0	0	0	0
						2.74	2510.85	#REF!	8.98994	8.5	22397	30.135	5.26448	390.491	501.401	643.811	1.95246	57.1672							229.334	0.434429	34.5048	194.829		501.401	233.796	11.6333	489.768		2.74		0	0	0	0	0	0	0	0	0	0	0	0	0
						2.76	2517.47	#REF!	9.05556	9	26255.7	35.3268	6.17147	396.663	509.325	653.986	1.98331	59.1505							229.502	0.26684	35.4943	194.007		509.325	225.872	12.1881	497.137		2.76		0	0	0	0	0	0	0	0	0	0	0	0	0
						2.78	2524.03	#REF!	9.12118	9	26255.7	35.3268	6.17147	402.834	517.249	664.161	2.01417	61.1647							229.646	0.122941	36.4993	193.146		517.249	217.948	12.7569	504.493		2.78		0	0	0	0	0	0	0	0	0	0	0	0	0
						2.8	2530.53	#REF!	9.1868	9	26255.7	35.3268	6.17147	409.006	525.174	674.337	2.04503	63.2097							229.769	0	37.5196	192.249		525.174	210.023	13.3398	511.834		2.8		0	0	0	0	0	0	0	0	0	0	0	0	0
						2.82	2536.97	#REF!	9.25242	9	26255.7	35.3268	6.17147	415.177	533.098	684.512	2.07589	65.2856												533.098	202.099	13.9368	519.161		2.82		0	0	0	0	0	0	0	0	0	0	0	0	0
						2.84	2543.36	#REF!	9.31804	9	26255.7	35.3268	6.17147	421.349	541.022	694.687	2.10674	67.3924												541.022	194.175	14.548	526.474		2.84		0	0	0	0	0	0	0	0	0	0	0	0	0
						2.86	2549.69	#REF!	9.38366	9	26255.7	35.3268	6.17147	427.52	548.947	704.862	2.1376	69.53												548.947	186.25	15.1734	533.773		2.86		0	0	0	0	0	0	0	0	0	0	0	0	0
						2.88	2555.96	#REF!	9.44928	9	26255.7	35.3268	6.17147	433.692	556.871	715.037	2.16846	71.6984												556.871	178.326	15.8131	541.058		2.88		0	0	0	0	0	0	0	0	0	0	0	0	0
						2.9	2562.19	#REF!	9.5149	9.5	20563.5	27.6679	4.83349	438.525	563.077	723.006	2.19263	73.8911												563.077	172.12	16.4672	546.61		2.9		0	0	0	0	0	0	0	0	0	0	0	0	0
						2.92	2568.36	#REF!	9.58052	9.5	20563.5	27.6679	4.83349	443.359	569.284	730.975	2.21679	76.1079												569.284	165.914	17.1356	552.148		2.92		0	0	0	0	0	0	0	0	0	0	0	0	0
						2.94	2574.48	#REF!	9.64614	9.5	20563.5	27.6679	4.83349	448.192	575.49	738.944	2.24096	78.3488												575.49	159.707	17.8185	557.672		2.94		0	0	0	0	0	0	0	0	0	0	0	0	0
						2.96	2580.56	#REF!	9.71176	9.5	20563.5	27.6679	4.83349	453.026	581.696	746.913	2.26513	80.6139												581.696	153.501	18.5159	563.18		2.96		0	0	0	0	0	0	0	0	0	0	0	0	0
						2.98	2586.58	#REF!	9.77738	9.5	20563.5	27.6679	4.83349	457.859	587.903	754.882	2.2893	82.9032												587.903	147.295	19.2279	568.675		2.98		0	0	0	0	0	0	0	0	0	0	0	0	0
						3	2592.55	#REF!	9.843	9.5	20563.5	27.6679	4.83349	462.693	594.109	762.851	2.31346	85.2167												594.109	141.088	19.9545	574.155		3		0	0	0	0	0	0	0	0	0	0	0	0	0
						3.02	2598.48	#REF!	9.90862	9.5	20563.5	27.6679	4.83349	467.526	600.315	770.82	2.33763	87.5543												600.315	134.882	20.6957	579.62		3.02		0	0	0	0	0	0	0	0	0	0	0	0	0
						3.04	2604.37	#REF!	9.97424	9.5	20563.5	27.6679	4.83349	472.36	606.522	778.789	2.3618	89.9161												606.522	128.676	21.4516	585.07		3.04		0	0	0	0	0	0	0	0	0	0	0	0	0
						3.06	2610.2	#REF!	10.0399	10	19585	26.3514	4.6035	476.963	612.433	786.379	2.38482	92.3009												612.433	122.765	22.2224	590.21		3.06		0	0	0	0	0	0	0	0	0	0	0	0	0
						3.08	2616	#REF!	10.1055	10	19585	26.3514	4.6035	481.567	618.344	793.969	2.40783	94.7088												618.344	116.854	23.0079	595.336		3.08		0	0	0	0	0	0	0	0	0	0	0	0	0
						3.1	2621.75	#REF!	10.1711	10	19585	26.3514	4.6035	486.17	624.255	801.559	2.43085	97.1396												624.255	110.943	23.8083	600.446		3.1		0	0	0	0	0	0	0	0	0	0	0	0	0
						3.12	2627.45	#REF!	10.2367	10	19585	26.3514	4.6035	490.774	630.166	809.149	2.45387	99.5935												630.166	105.032	24.6236	605.542		3.12		0	0	0	0	0	0	0	0	0	0	0	0	0
						3.14	2633.12	#REF!	10.3023	10	19585	26.3514	4.6035	495.377	636.077	816.739	2.47689	102.07												636.077	99.1205	25.4538	610.623		3.14		0	0	0	0	0	0	0	0	0	0	0	0	0
						3.16	2638.74	#REF!	10.368	10	19585	26.3514	4.6035	499.981	641.988	824.329	2.4999	104.57												641.988	93.2095	26.2991	615.689		3.16		0	0	0	0	0	0	0	0	0	0	0	0	0
						3.18	2644.33	#REF!	10.4336	10	19585	26.3514	4.6035	504.584	647.899	831.919	2.52292	107.093												647.899	87.2985	27.1595	620.739		3.18		0	0	0	0	0	0	0	0	0	0	0	0	0
						3.2	2649.87	#REF!	10.4992	10	19585	26.3514	4.6035	509.188	653.81	839.508	2.54594	109.639												653.81	81.3874	28.0349	625.775		3.2		0	0	0	0	0	0	0	0	0	0	0	0	0
						3.22	2655.38	#REF!	10.5648	10.5	25483.5	34.2877	5.98995	515.178	661.501	849.384	2.57589	112.215												661.501	73.6962	28.9255	632.576		3.22		0	0	0	0	0	0	0	0	0	0	0	0	0
						3.24	2660.85	#REF!	10.6304	10.5	25483.5	34.2877	5.98995	521.168	669.192	859.26	2.60584	114.821												669.192	66.0049	29.8313	639.361		3.24		0	0	0	0	0	0	0	0	0	0	0	0	0
						3.26	2666.28	#REF!	10.6961	10.5	25483.5	34.2877	5.98995	527.157	676.884	869.136	2.63579	117.457												676.884	58.3137	30.7523	646.131		3.26
						3.28	2671.67	#REF!	10.7617	10.5	25483.5	34.2877	5.98995	533.147	684.575	879.011	2.66574	120.122												684.12	51.0774	31.6886	652.431		3.28
						3.3	2677.03	#REF!	10.8273	10.5	25483.5	34.2877	5.98995	539.137	692.266	888.887	2.69569	122.818												690.614	44.5836	32.6403	657.973		3.3
						3.32	2682.35	#REF!	10.8929	10.5	21843	29.3895	5.98995	545.127	699.957	898.763	2.72564	125.544												696.422	38.7748	33.6074	662.815		3.32
						3.34	2687.63	#REF!	10.9585	10.5	21843	29.3895	5.13425	550.262	706.55	907.228	2.75131	128.295												701.601	33.5958	34.5898	667.012		3.34
						3.36	2692.88	#REF!	11.0242	11	17644.5	23.7405	4.14738	554.409	711.875	914.066	2.77204	131.067												706.204	28.9933	35.5878	670.616		3.36
						3.38	2698.1	#REF!	11.0898	11	17644.5	23.7405	4.14738	558.556	717.201	920.904	2.79278	133.86												710.281	24.9165	36.6012	673.68		3.38
						3.4	2703.28	#REF!	11.1554	11	17644.5	23.7405	4.14738	562.704	722.526	927.742	2.81352	136.673												713.88	21.3171	37.6302	676.25		3.4
						3.42	2708.43	#REF!	11.221	11	17644.5	23.7405	4.14738	566.851	727.851	934.579	2.83426	139.508												717.048	18.1496	38.6748	678.373		3.42
						3.44	2713.55	#REF!	11.2866	11	17644.5	23.7405	4.14738	570.998	733.177	941.417	2.85499	142.363												719.826	15.3712	39.7351	680.091		3.44
						3.46	2718.64	#REF!	11.3523	11	17644.5	23.7405	4.14738	575.146	738.502	948.255	2.87573	145.238												722.255	12.9423	40.811	681.444		3.46
						3.48	2723.69	#REF!	11.4179	11	17644.5	23.7405	4.14738	579.293	743.827	955.093	2.89647	148.135												724.371	10.8259	41.9027	682.469		3.48
						3.5	2728.72	#REF!	11.4835	11	17644.5	23.7405	4.14738	583.441	749.153	961.931	2.9172	151.052												726.209	8.9882	43.0101	683.199		3.5
						3.52	2733.71	#REF!	11.5491	11.5	20580.8	27.6913	4.83758	588.278	755.364	969.907	2.94139	153.993												727.799	7.39788	44.1334	683.666		3.52
						3.54	2738.67	#REF!	11.6147	11.5	20580.8	27.6913	4.83758	593.116	761.576	977.883	2.96558	156.959												729.171	6.02645	45.2725	683.898		3.54
						3.56	2743.61	#REF!	11.6804	11.5	20580.8	27.6913	4.83758	597.953	767.787	985.858	2.98977	159.949												730.349	4.84799	46.4275	683.922		3.56
						3.58	2748.51	#REF!	11.746	11.5	20580.8	27.6913	4.83758	602.791	773.999	993.834	3.01395	162.963												731.358	3.83907	47.5984	683.76		3.58
						3.6	2753.39	#REF!	11.8116	11.5	20580.8	27.6913	4.83758	607.629	780.21	1001.81	3.03814	166.001												732.219	2.97855	48.7853	683.433		3.6
						3.62	2758.24	#REF!	11.8772	11.5	20580.8	27.6913	4.83758	612.466	786.422	1009.79	3.06233	169.063												732.95	2.24743	49.9882	682.962		3.62
						3.64	2763.06	#REF!	11.9428	11.5	20580.8	27.6913	4.83758	617.304	792.634	1017.76	3.08652	172.15												733.569	1.62872	51.2072	682.361		3.64
						3.66	2767.85	#REF!	12.0085	12	20051	26.9784	5.8913	623.195	800.198	1027.47	3.11597	175.266												734.09	1.10728	52.4422	681.648		3.66
						3.68	2772.61	#REF!	12.0741	12	20051	26.9784	5.8913	629.086	807.763	1037.19	3.14543	178.411												734.528	0.669695	53.6934	680.834		3.68
						3.7	2777.35	#REF!	12.1397	12	20051	26.9784	5.8913	634.978	815.327	1046.9	3.17489	181.586												734.893	0.304082	54.9608	679.932		3.7
						3.72	2782.06	#REF!	12.2053	12	20051	26.9784	5.8913	640.869	822.892	1056.61	3.20434	184.79												735.197	0	56.2443	678.953		3.72
						3.74	2786.75	#REF!	12.2709	12	20051	26.9784	5.8913	646.76	830.456	1066.33	3.2338	188.024
							0
							0
							0
							0
							0
							0
							0
							0
							0
							0
							0
							0
							0
							0
							0
							0
							0
							0
							0
							0
							0
							0
							0
							0
[truncated: 137 more columns]

## Sheet: Middletown_2
																																					7.38976	7.11708	6.85445	6.60151	6.3579	6.95121	5.69981	5.48948	6.20972	5.98057	6.5062	6.26611	6.03487
																																					0	1	2	3	4	5	6	7	8	9	10	11	12
	INPUTS			ERROR CHECK		Surge height (m)	Wall Length (m)	sum of middleH * dL	Surge height (ft)	Rounding (ft)	delta Area (sq m)	Building numbers	Building Values (million $)	Cum Value	2080	2130	Marginal Damage	Damage	2030	Expected Benefit (million $, PV)	Residual Dam (million $, PV)	Cost (Million $)	Net Benefit (million $, PV)	2080	Expected Benefit (million $, PV)	Residual Dam (million $, PV)	Cost (Million $)	Net Benefit (million $, PV)	2130	Expected Benefit (million $, PV)	Residual Dam (million $, PV)	Cost (million $)	Net Benefit (million $, PV)		Surge height (m)		0	1	2	3	4	5	6	7	8	9	10	11	12
	SPATIAL DATA					1.2	1228.15	#REF!	3.9372	3.5	10689.4	0	0	0	0	0	0	0		0	55.1467	1.12401	-1.12401		0	172.647	0.01	-0.01		0	0	0.01	-0.01		1.2
	Target City	Middletown				1.22	1254.76	#REF!	4.00282	4	2648.9	2.47272	0.57811	0.57811	0.742307	0.953141	0.00289055	0.00289055		0	55.1467	1.26606	-1.26606		0	172.647	0.01	-0.01		0	0	0.01	-0.01		1.22		0	0	0	0	0	0	0	0	0	0	0	0	0
	Policy Year (base year: 2020)	#REF!				1.24	1281.11	#REF!	4.06844	4	2648.9	2.47272	0.57811	1.15622	1.48461	1.90628	0.0057811	0.00867164		0	55.1467	1.41869	-1.41869		0	172.647	0.01	-0.01		0	0	0.01	-0.01		1.24		0	0	0	0	0	0	0	0	0	0	0	0	0
	SLR rate (before policy)	4.17	mm/year			1.26	1307.22	#REF!	4.13406	4	2648.9	2.47272	0.57811	1.73433	2.22692	2.85942	0.00867164	0.0173433		0	55.1467	1.5822	-1.5822		0	172.647	0.0366389	-0.0366389		0	0	0.01	-0.01		1.26		0	0	0	0	0	0	0	0	0	0	0	0	0
	SLR rate (after policy)	#REF!	mm/year			1.28	1333.1	#REF!	4.19968	4	2648.9	2.47272	0.57811	2.31244	2.96923	3.81257	0.0115622	0.0289055		0	55.1467	1.75688	-1.75688		0	172.647	0.0617652	-0.0617652		0	0	0.01	-0.01		1.28		0	0	0	0	0	0	0	0	0	0	0	0	0
	MHHW	0.74	meter			1.3	1358.75	#REF!	4.2653	4	2648.9	2.47272	0.57811	2.89055	3.71154	4.76571	0.0144527	0.0433582		0	55.1467	1.94301	-1.94301		0	172.647	0.0940416	-0.0940416		0	0	0.01	-0.01		1.3		0	0	0	0	0	0	0	0	0	0	0	0	0
						1.32	1384.17	#REF!	4.33092	4	2648.9	2.47272	0.57811	3.46866	4.45384	5.71885	0.0173433	0.0607015		1.14946	53.9973	2.14088	-0.991418		0	172.647	0.133805	-0.133805		0	0	0.01	-0.01		1.32		0.247496	0.238363	0.229567	0.221096	0.212937	0	0	0	0	0	0	0	0
						1.34	1409.37	#REF!	4.39654	4	2648.9	2.47272	0.57811	4.04677	5.19615	6.67199	0.0202338	0.0809353		3.61353	51.5332	2.35076	1.26277		0	172.647	0.181386	-0.181386		0	0	0.01	-0.01		1.34		0.275497	0.265331	0.25554	0.24611	0.237028	0.273439	0.219857	0.211744	0.244271	0.235257	0	0	0
	GEV ESTIMATION					1.36	1434.35	#REF!	4.46216	4	2648.9	2.47272	0.57811	4.62488	5.93846	7.62513	0.0231244	0.10406		4.62488	50.5219	2.57293	2.05195		0	172.647	0.23711	-0.23711		0	0	0.01	-0.01		1.36		0.295754	0.28484	0.274329	0.264206	0.254456	0.293504	0.236023	0.227313	0.262196	0.25252	0.291311	0.280561	0.270208
	μ (location)	1.572				1.38	1459.12	#REF!	4.52778	4.5	2569.37	2.39849	0.560754	5.18563	6.65848	8.54966	0.0259281	0.129988		5.18563	49.9611	2.80766	2.37797		0	172.647	0.301297	-0.301297		0	0	0.01	-0.01		1.38		0.308526	0.297141	0.286176	0.275616	0.265445	0.306129	0.246216	0.23713	0.273474	0.263382	0.303799	0.292589	0.281792
	σ (scale)	0.1831				1.4	1483.69	#REF!	4.5934	4.5	2569.37	2.39849	0.560754	5.74638	7.3785	9.47418	0.0287319	0.15872		5.74638	49.4004	3.05521	2.69117		0	172.647	0.374263	-0.374263		0	0	0.01	-0.01		1.4		0.314664	0.303052	0.291869	0.281099	0.270726	0.312157	0.251114	0.241847	0.278859	0.268569	0.309731	0.298301	0.287294
	k (shape)	-0.1136				1.42	1508.05	#REF!	4.65902	4.5	2569.37	2.39849	0.560754	6.30714	8.09852	10.3987	0.0315357	0.190255		6.30714	48.8396	3.31585	2.99129		0	172.647	0.456318	-0.456318		0	0	0.01	-0.01		1.42		0.315125	0.303496	0.292296	0.28151	0.271122	0.31254	0.251481	0.242201	0.279201	0.268898	0.31005	0.298609	0.28759
						1.44	1532.21	#REF!	4.72464	4.5	2569.37	2.39849	0.560754	6.86789	8.81855	11.3232	0.0343395	0.224595		6.86789	48.2788	3.58984	3.27805		0	172.647	0.547766	-0.547766		0	0	0.01	-0.01		1.44		0.310883	0.29941	0.288362	0.27772	0.267472	0.308246	0.248096	0.238941	0.275365	0.265204	0.305718	0.294437	0.283571
	Coefficients of the cost function					1.46	1556.18	#REF!	4.79026	4.5	2569.37	2.39849	0.560754	7.42864	9.53857	12.2478	0.0371432	0.261738		7.42864	47.7181	3.87743	3.55121		0	172.647	0.648909	-0.648909		0	0	1.28536	-1.28536		1.46		0.302873	0.291697	0.280932	0.270565	0.260581	0.300204	0.241704	0.232785	0.268181	0.258284	0.297658	0.286674	0.276095
	coef1	0.465652				1.48	1579.96	#REF!	4.85588	4.5	2569.37	2.39849	0.560754	7.9894	10.2586	13.1723	0.039947	0.301685		7.9894	47.1573	4.17887	3.81052		0	172.647	0.760042	-0.760042		0	0	1.17124	-1.17124		1.48		0.291957	0.281183	0.270807	0.260814	0.251189	0.289268	0.232993	0.224395	0.258411	0.248876	0.286718	0.276138	0.265948
	coef2	0.00045981				1.5	1603.55	#REF!	4.9215	4.5	2569.37	2.39849	0.560754	8.55015	10.9786	14.0968	0.0427508	0.344436		8.55015	46.5966	4.49442	4.05573		0	172.647	0.881457	-0.881457		0	0	1.06032	-1.06032		1.5		0.278903	0.268611	0.258699	0.249152	0.239958	0.276202	0.222575	0.214362	0.246739	0.237634	0.273658	0.263559	0.253833
	coef3	1.02477e-07		Buildings exist under MHHW		1.52	1626.95	#REF!	4.98712	4.5	2569.37	2.39849	0.560754	9.11091	11.6986	15.0213	0.0455545	0.38999		9.11091	46.0358	4.82432	4.28658		0	172.647	1.01344	-1.01344		0	0	0.952952	-0.952952		1.52		0.264378	0.254622	0.245226	0.236177	0.227462	0.261668	0.210984	0.203198	0.233756	0.22513	0.259134	0.249572	0.240362
	coef4	8.12818e-12				1.54	1650.18	#REF!	5.05274	5	5812.91	5.4263	1.26864	10.3795	13.3276	17.113	0.0518977	0.441888		10.3795	44.7672	5.16881	5.21074		0	172.647	1.15628	-1.15628		0	0	0.849512	-0.849512		1.54		0.250961	0.2417	0.232781	0.224191	0.215918	0.24822	0.200276	0.192886	0.221742	0.21356	0.245676	0.23661	0.227879
	q	3.58584e+06				1.56	1673.23	#REF!	5.11836	5	5812.91	5.4263	1.26864	11.6482	14.9566	19.2046	0.0582409	0.500129		11.6482	43.4986	5.52813	6.12005		0	172.647	1.31025	-1.31025		0	0	0.750356	-0.750356		1.56		0.238149	0.229361	0.220897	0.212746	0.204895	0.235358	0.190052	0.183039	0.210252	0.202494	0.232787	0.224197	0.215924
	Growth Rate	0.005	%/year			1.58	1696.1	#REF!	5.18398	5	5812.91	5.4263	1.26864	12.9168	16.5855	21.2962	0.0645841	0.564713		12.9168	42.2299	5.90252	7.0143		0	172.647	1.47563	-1.47563		0	0	0.655836	-0.655836		1.58		0.225675	0.217347	0.209327	0.201602	0.194163	0.222817	0.180097	0.173451	0.199049	0.191703	0.220205	0.212079	0.204253
	discount rate	0.0426	%/year			1.6	1718.81	#REF!	5.2496	5	5812.91	5.4263	1.26864	14.1855	18.2145	23.3879	0.0709273	0.635641		14.1855	40.9613	6.29222	7.89325		0	172.647	1.65269	-1.65269		0	0	0.566299	-0.566299		1.6		0.213427	0.205551	0.197966	0.19066	0.183625	0.210485	0.170323	0.164037	0.188032	0.181093	0.207818	0.20015	0.192764
	useful_life	30	years			1.62	1741.35	#REF!	5.31522	5	5812.91	5.4263	1.26864	15.4541	19.8435	25.4795	0.0772705	0.712911		15.4541	39.6926	6.69744	8.75666		3.73231	168.915	1.8417	1.89061		0	0	0.482088	-0.482088		1.62		0.201389	0.193958	0.1868	0.179907	0.173268	0.198347	0.160716	0.154785	0.177189	0.17065	0.195612	0.188394	0.181442
	CapEx	0.005				1.64	1763.72	#REF!	5.38084	5	5812.91	5.4263	1.26864	16.7227	21.4724	27.5711	0.0836137	0.796525		16.7227	38.424	7.11843	9.60431		15.0978	157.55	2.04292	13.0549		0	0	0.403539	-0.403539		1.64		0.189605	0.182608	0.17587	0.16938	0.163129	0.186446	0.151312	0.145728	0.166558	0.160411	0.183629	0.176853	0.170327
	Difference	0.02	meter			1.66	1785.93	#REF!	5.44646	5	5812.91	5.4263	1.26864	17.9914	23.1014	29.6628	0.0899569	0.886482		17.9914	37.1554	7.55542	10.436		23.1014	149.546	2.25661	20.8448		0	0	0.330984	-0.330984		1.66		0.178146	0.171572	0.165241	0.159143	0.15327	0.174853	0.142167	0.136921	0.156201	0.150437	0.17194	0.165595	0.159484
	Minimum height where buildings locate	4	ft			1.68	1807.99	#REF!	5.51208	5.5	6099.31	5.69364	1.33114	19.3225	24.8106	31.8575	0.0966127	0.983094		19.3225	35.8242	8.00861	11.3139		24.8106	147.837	2.48304	22.3276		0	0	0.264747	-0.264747		1.68		0.167148	0.16098	0.155039	0.149318	0.143808	0.163702	0.13339	0.128468	0.14624	0.140843	0.160676	0.154747	0.149036
	A factor to account for other damages than buildings	2				1.7	1829.89	#REF!	5.5777	5.5	6099.31	5.69364	1.33114	20.6537	26.5198	34.0522	0.103268	1.08636		20.6537	34.4931	8.47823	12.1754		26.5198	146.128	2.72246	23.7974		0	0	0.205152	-0.205152		1.7		0.156667	0.150886	0.145318	0.139955	0.134791	0.15305	0.125026	0.120413	0.136724	0.131678	0.149895	0.144363	0.139036
	Ratio of houses w/ basements	0.5	(1=All have basements; 0=No basements)			1.72	1851.63	#REF!	5.64332	5.5	6099.31	5.69364	1.33114	21.9848	28.2291	36.2468	0.109924	1.19629		21.9848	33.1619	8.96451	13.0203		28.2291	144.418	2.97511	25.254		0	0	0.152515	-0.152515		1.72		0.146761	0.141345	0.136129	0.131106	0.126268	0.142952	0.117121	0.112799	0.127703	0.122991	0.139652	0.134498	0.129535
	Average height of the first floor	0.9	meter			1.74	1873.23	#REF!	5.70894	5.5	6099.31	5.69364	1.33114	23.316	29.9383	38.4415	0.11658	1.31287		23.316	31.8308	9.46766	13.8483		29.9383	142.709	3.24125	26.697		0	0	0.107149	-0.107149		1.74		0.137479	0.132406	0.12752	0.122814	0.118282	0.133459	0.109714	0.105665	0.119223	0.114824	0.129996	0.125199	0.120579
	Coastal length 12ft	3025.54				1.76	1894.68	#REF!	5.77456	5.5	6099.31	5.69364	1.33114	24.6471	31.6475	40.6362	0.123236	1.4361		24.6471	30.4996	9.98789	14.6592		31.6475	141	3.52112	28.1264		0	0	0.0693603	-0.0693603		1.76		0.128862	0.124107	0.119527	0.115116	0.110868	0.124611	0.102837	0.0990419	0.111318	0.10721	0.120967	0.116503	0.112204
	OUTPUTS	2030	20800	2130		1.78	1915.98	#REF!	5.84018	5.5	6099.31	5.69364	1.33114	25.9783	33.3567	42.8309	0.129891	1.56599		25.9783	29.1685	10.5254	15.4528		33.3567	139.291	3.81497	29.5418		0	0	0.0394539	-0.0394539		1.78		0.120938	0.116475	0.112177	0.108037	0.104051	0.116435	0.096513	0.0929515	0.104015	0.100176	0.112593	0.108438	0.104437
	Optimal Level of Flood Defense	1.8	2.46	3.44		1.8	1937.14	#REF!	5.9058	5.5	6099.31	5.69364	1.33114	27.3094	35.066	45.0256	0.136547	1.70254		27.3094	27.8373	11.0804	16.229		35.066	137.581	4.12303	30.9429		0	0	0.0177287	-0.0177287		1.8		0.113724	0.109528	0.105486	0.101593	0.0978444	0.108949	0.0907563	0.0874073	0.0973273	0.0937357	0.104892	0.101021	0.0972935
	Maximum height of Walls					1.2	1947.14	#REF!	3.9372	3.5	10689.4	0	0	27.3094	35.066	45.0256	0.136547	1.83909		27.3094	27.8373	1.78202	25.5274		35.066	137.581	0.00111376	35.0648		0	0	4.56198	-4.56198		1.2		0.106841	0.102899	0.0991017	0.0954446	0.0919225	0.101791	0.0852635	0.0821171	0.0909333	0.0875777	0.097517	0.0939185	0.0904527
	Average height of Walls	1	1.27	1.6		1.22	1957.14	#REF!	4.00282	4	2648.9	2.47272	0.57811	27.8875	35.8083	45.9787	0.139438	1.97852		27.8875	27.2592	1.97477	25.9127		35.8083	136.839	0.0100754	35.7982		0	0	4.3033	-4.3033		1.22		0.100578	0.0968667	0.0932921	0.0898494	0.0865338	0.0952427	0.0802651	0.0773032	0.0850831	0.0819434	0.0907409	0.0873924	0.0841675
	Average Elevation of wall	0.8	1.19	1.84		1.24	1967.14	#REF!	4.06844	4	2648.9	2.47272	0.57811	28.4656	36.5506	46.9319	0.142328	2.12085		28.4656	26.6811	2.1784	26.2872		36.5506	136.097	0.0281301	36.5224		0	358.187	4.05074	-4.05074		1.24		0.094968	0.0914635	0.0880883	0.0848377	0.081707	0.0893358	0.075788	0.0729913	0.0798063	0.0768613	0.0845967	0.0814749	0.0784683
	Wall Length	2247.14	2568.09	3334.73		1.26	1977.14	#REF!	4.13406	4	2648.9	2.47272	0.57811	29.0437	37.2929	47.885	0.145219	2.26607		29.0437	26.103	2.39304	26.6507		37.2929	135.355	0.0554153	37.2375		0	358.187	3.80443	-3.80443		1.26		0.0900202	0.0866983	0.083499	0.0804177	0.0774501	0.08408	0.0718395	0.0691885	0.0751112	0.0723394	0.0790936	0.0761749	0.0733639
	Cost of Wall	12.8536	23.6927	48.8311		1.28	1987.14	#REF!	4.19968	4	2648.9	2.47272	0.57811	29.6218	38.0352	48.8381	0.148109	2.41418		29.6218	25.5249	2.61883	27.003		38.0352	134.612	0.0920682	37.9431		0	358.187	3.56452	-3.56452		1.28		0.0857268	0.0825633	0.0795166	0.0765823	0.0737562	0.0794674	0.0684132	0.0658886	0.0709905	0.0683709	0.0742235	0.0714846	0.0688466
	Expected Benefit	50.7978	166.662	351.935		1.3	1997.14	#REF!	4.2653	4	2648.9	2.47272	0.57811	30.1999	38.7775	49.7913	0.151	2.56518		30.1999	24.9468	2.85591	27.344		38.7775	133.87	0.138226	38.6393		0	358.187	3.33113	-3.33113		1.3		0.0820673	0.0790388	0.0761221	0.0733131	0.0706077	0.0754775	0.0654927	0.0630759	0.0674263	0.0649381	0.0699664	0.0673845	0.0648979
	Net Benefit	37.9442	142.969	303.104		1.32	2007.14	#REF!	4.33092	4	2648.9	2.47272	0.57811	30.7781	39.5198	50.7444	0.15389	2.71907		30.7781	24.3687	3.10442	27.6736		39.5198	133.128	0.194026	39.3258		0	358.187	3.10442	-3.10442		1.32		0.0790127	0.076097	0.0732889	0.0705844	0.0679797	0.0720817	0.0630551	0.0607282	0.0643927	0.0620165	0.0662938	0.0638474	0.0614913
	Residual Damage	4.34889	5.98551	5.70811		1.34	2017.14	#REF!	4.39654	4	2648.9	2.47272	0.57811	31.3562	40.2621	51.6976	0.156781	2.87585		31.3562	23.7906	3.36449	27.9917		40.2621	132.385	0.259606	40.0025		0	358.187	2.88451	-2.88451		1.34		0.0765291	0.073705	0.0709851	0.0683657	0.0658428	0.0692462	0.061073	0.0588193	0.0618596	0.0595769	0.0631719	0.0608407	0.0585956
	Expected Damage	55.1467	172.647	357.643		1.36	2027.14	#REF!	4.46216	4	2648.9	2.47272	0.57811	31.9343	41.0044	52.6507	0.159671	3.03552		31.9343	23.2125	3.63627	28.298		41.0044	131.643	0.335103	40.6693		0	358.187	2.67154	-2.67154		1.36		0.074606	0.0718529	0.0692014	0.0666478	0.0641883	0.0669339	0.0595384	0.0573413	0.059794	0.0575875	0.0605641	0.0583292	0.0561767
						1.38	2037.14	#REF!	4.52778	4.5	2569.37	2.39849	0.560754	32.495	41.7244	53.5752	0.162475	3.198		32.495	22.6517	3.91988	28.5751		41.7244	130.923	0.420653	41.3038		0	358.187	2.46566	-2.46566		1.38		0.0722155	0.0695506	0.066984	0.0645122	0.0621316	0.0651285	0.0576306	0.0555039	0.0581812	0.0560342	0.058431	0.0562748	0.0541981
	Surge height (ft)	Area submerged (sq m)	delta Area (sq m)	Building numbers	Building Values (million $)	1.4	2047.14	#REF!	4.5934	4.5	2569.37	2.39849	0.560754	33.0558	42.4445	54.4998	0.165279	3.36328		33.0558	22.091	4.21547	28.8403		42.4445	130.203	0.516395	41.9281		0	358.187	2.26699	-2.26699		1.4		0.0694357	0.0668734	0.0644057	0.062029	0.05974	0.0629314	0.0554123	0.0533675	0.0562184	0.0541439	0.0567555	0.0546612	0.0526441
0.9144	3	62868.5	0	0	0	1.42	2057.14	#REF!	4.65902	4.5	2569.37	2.39849	0.560754	33.6165	43.1645	55.4243	0.168083	3.53136		33.6165	21.5302	4.52317	29.0934		43.1645	129.483	0.622466	42.542		0	358.187	2.07567	-2.07567		1.42		0.0663438	0.0638956	0.0615377	0.0592669	0.0570798	0.0604109	0.0529448	0.0509911	0.0539668	0.0519753	0.0547519	0.0527315	0.0507856
1.0668	3.5	84247.4	21378.9	0	0	1.44	2067.14	#REF!	4.72464	4.5	2569.37	2.39849	0.560754	34.1773	43.8845	56.3488	0.170886	3.70225		34.1773	20.9695	4.84313	29.3342		43.8845	128.763	0.739003	43.1455		0	358.187	1.89185	-1.89185		1.44		0.0630132	0.0606879	0.0584484	0.0562915	0.0542143	0.0576337	0.0502869	0.0484312	0.0514858	0.0495859	0.0524797	0.0505431	0.0486779
1.2192	4	126630	42382.4	39.5636	9.24975	1.46	2077.14	#REF!	4.79026	4.5	2569.37	2.39849	0.560754	34.738	44.6045	57.2733	0.17369	3.87594		34.738	20.4087	5.17547	29.5626		44.6045	128.043	0.866143	43.7384		0	358.187	1.71565	-1.71565		1.46		0.0595127	0.0573166	0.0552015	0.0531644	0.0512026	0.0546633	0.0474934	0.0457408	0.0488323	0.0470303	0.0499966	0.0481516	0.0463747
1.3716	4.5	167740	41110	38.3758	8.97206	1.48	2087.14	#REF!	4.85588	4.5	2569.37	2.39849	0.560754	35.2988	45.3245	58.1979	0.176494	4.05243		35.2988	19.8479	5.52034	29.7785		45.3245	127.323	1.00402	44.3205		0	358.187	1.54722	-1.54722		1.48		0.0559052	0.0538422	0.0518553	0.0499418	0.0480988	0.0515586	0.0446144	0.0429681	0.0460588	0.0443592	0.0473573	0.0456097	0.0439267
1.524	5	249121	81380.8	75.9682	17.761	1.5	2097.14	#REF!	4.9215	4.5	2569.37	2.39849	0.560754	35.8595	46.0446	59.1224	0.179298	4.23173		35.8595	19.2872	5.87787	29.9817		46.0446	126.603	1.15278	44.8918		0	358.187	1.3867	-1.3867		1.5		0.0522472	0.0503192	0.0484623	0.0466739	0.0449516	0.0483735	0.0416952	0.0401566	0.0432134	0.0416188	0.0446125	0.0429662	0.0413806
1.6764	5.5	340610	91489.6	85.4047	19.9672	1.52	2107.14	#REF!	4.98712	4.5	2569.37	2.39849	0.560754	36.4203	46.7646	60.0469	0.182102	4.41383		36.4203	18.7264	6.24819	30.1721		46.7646	125.883	1.31255	45.452		0	358.187	1.23421	-1.23421		1.52		0.0485883	0.0467953	0.0450685	0.0434054	0.0418036	0.0451558	0.0387753	0.0373444	0.040339	0.0388504	0.0418078	0.040265	0.0387792
1.8288	6	439686	99075.5	92.486	21.6227	1.54	2117.14	#REF!	5.05274	5	5812.91	5.4263	1.26864	37.6889	48.3936	62.1386	0.188445	4.60227		37.6889	17.4578	6.63146	31.0575		48.3936	124.254	1.48348	46.9101		0	358.187	1.0899	-1.0899		1.54		0.0450062	0.0433453	0.0417458	0.0402053	0.0387217	0.0419799	0.0359166	0.0345912	0.0375019	0.036118	0.0390142	0.0375745	0.036188
1.9812	6.5	562071	122385	114.245	26.71	1.56	2127.14	#REF!	5.11836	5	5812.91	5.4263	1.26864	38.9576	50.0225	64.2302	0.194788	4.79706		38.9576	16.1892	7.0278	31.9298		50.0225	122.625	1.6657	48.3568		0	358.187	0.953912	-0.953912		1.56		0.041525	0.0399927	0.0385169	0.0370955	0.0357266	0.0388712	0.0331385	0.0319156	0.0347247	0.0334433	0.0362574	0.0349195	0.0336309
2.1336	7	632941	70870.3	66.1567	15.4671	1.58	2137.14	#REF!	5.18398	5	5812.91	5.4263	1.26864	40.2262	51.6515	66.3218	0.201131	4.99819		40.2262	14.9205	7.43735	32.7889		51.6515	120.996	1.85934	49.7922		0	358.187	0.826372	-0.826372		1.58		0.0381651	0.0367568	0.0354004	0.034094	0.0328359	0.0358509	0.0304572	0.0293333	0.0320267	0.0308448	0.0335597	0.0323213	0.0311285
2.286	7.5	742276	109335	102.063	23.8619	1.6	2147.14	#REF!	5.2496	5	5812.91	5.4263	1.26864	41.4949	53.2805	68.4135	0.207474	5.20567		41.4949	13.6519	7.86025	33.6346		53.2805	119.367	2.06454	51.2159		0	358.187	0.707423	-0.707423		1.6		0.0349428	0.0336534	0.0324115	0.0312155	0.0300635	0.0329369	0.0278857	0.0268566	0.0294235	0.0283377	0.0309397	0.029798	0.0286984
2.4384	8	830874	88598	82.7054	19.3361	1.62	2157.14	#REF!	5.31522	5	5812.91	5.4263	1.26864	42.7635	54.9094	70.5051	0.213818	5.41948		42.7635	12.3832	8.29664	34.4669		54.9094	117.738	2.28145	52.628		0	358.187	0.5972	-0.5972		1.62		0.0318708	0.0306947	0.029562	0.0284711	0.0274205	0.0301434	0.0254341	0.0244955	0.026928	0.0259343	0.028413	0.0273645	0.0263547
2.5908	8.5	940431	109556	102.27	23.9101	1.64	2167.14	#REF!	5.38084	5	5812.91	5.4263	1.26864	44.0321	56.5384	72.5967	0.220161	5.63965		43.9863	11.1604	8.74665	35.2396		56.5384	116.109	2.5102	54.0282		0	358.187	0.495842	-0.495842		1.64		0.0289584	0.0278898	0.0268606	0.0258694	0.0249148	0.0274814	0.0231099	0.0222571	0.02455	0.023644	0.0259919	0.0250328	0.024109
2.7432	9	1.04273e+06	102297	95.4929	22.3257	1.66	2177.14	#REF!	5.44646	5	5812.91	5.4263	1.26864	45.3008	58.1674	74.6884	0.226504	5.86615		45.1192	10.0276	9.21042	35.9088		58.1674	114.48	2.75092	55.4164		0	358.187	0.403485	-0.403485		1.66		0.0262121	0.0252449	0.0243133	0.0234161	0.022552	0.0249591	0.0209183	0.0201463	0.0222967	0.0214739	0.0236861	0.022812	0.0219702
2.8956	9.5	1.13875e+06	96020.1	89.6338	20.9559	1.68	2187.14	#REF!	5.51208	5.5	6099.31	5.69364	1.33114	46.6319	59.8766	76.883	0.23316	6.09931		46.1647	8.98204	9.68809	36.4766		59.8766	112.771	3.00376	56.8728		41.0012	317.186	0.320267	40.681		1.68		0.0236369	0.0227647	0.0219246	0.0211155	0.0203363	0.0225831	0.0188631	0.018167	0.0201741	0.0194296	0.0215035	0.02071	0.0199457
3.048	10	1.21649e+06	77747.2	72.5763	16.9679	1.7	2197.14	#REF!	5.5777	5.5	6099.31	5.69364	1.33114	47.9631	61.5858	79.0777	0.239815	6.33912		47.1259	8.02084	10.1798	36.9461		61.5858	111.062	3.26884	58.317		61.5858	296.601	0.246326	61.3395		1.7		0.0212336	0.02045	0.0196954	0.0189686	0.0182686	0.020356	0.0169452	0.0163199	0.0181846	0.0175135	0.0194484	0.0187307	0.0180395
3.2004	10.5	1.29668e+06	80184.2	74.8512	17.4998	1.72	2207.14	#REF!	5.64332	5.5	6099.31	5.69364	1.33114	49.2942	63.295	81.2724	0.246471	6.5856		48.0062	7.1405	10.6857	37.3206		63.295	109.352	3.54632	59.7487		63.295	294.892	0.181798	63.1132		1.72		0.0190012	0.0183001	0.0176248	0.0169744	0.016348	0.0182786	0.0151637	0.0146041	0.0163288	0.0157262	0.0175231	0.0168764	0.0162537
3.3528	11	1.3922e+06	95523.9	89.1706	20.8476	1.74	2217.14	#REF!	5.70894	5.5	6099.31	5.69364	1.33114	50.6254	65.0042	83.4671	0.253127	6.83872		48.8095	6.33723	11.2059	37.6037		65.0042	107.643	3.83632	61.1679		65.0042	293.183	0.12682	64.8774		1.74		0.0169371	0.0163121	0.0157102	0.0151304	0.0145721	0.0163499	0.0135164	0.0130177	0.0146058	0.0140668	0.015728	0.0151477	0.0145887
3.5052	11.5	1.4958e+06	103593	96.7031	22.6087	1.76	2227.14	#REF!	5.77456	5.5	6099.31	5.69364	1.33114	51.9565	66.7135	85.6618	0.259783	7.0985		49.5397	5.60701	11.7405	37.7992		66.7135	105.934	4.13898	62.5745		66.7135	291.473	0.0815312	66.6319		1.76		0.0150371	0.0144822	0.0139478	0.0134331	0.0129374	0.0145675	0.0120002	0.0115574	0.0130135	0.0125333	0.0140624	0.0135435	0.0130437
3.6576	12	1.58727e+06	91476.4	85.3923	19.9643	1.78	2237.14	#REF!	5.84018	5.5	6099.31	5.69364	1.33114	53.2876	68.4227	87.8565	0.266438	7.36494		50.2011	4.94566	12.2897	37.9114		68.4227	104.225	4.45444	63.9682		68.4227	289.764	0.0460672	68.3766		1.78		0.0132961	0.0128054	0.0123329	0.0118778	0.0114395	0.0129277	0.0106108	0.0102192	0.0115487	0.0111225	0.0125239	0.0120617	0.0116166
3.81	12.5	1.69573e+06	108458	101.244	23.6704	1.8	2247.14	#REF!	5.9058	5.5	6099.31	5.69364	1.33114	54.6188	70.1319	90.0512	0.273094	7.63804		50.7978	4.34889	12.8536	37.9442		70.1319	102.515	4.78284	65.3491		70.1319	288.055	0.0205658	70.1113		1.8		0.0117077	0.0112757	0.0108596	0.0104589	0.0100729	0.0114259	0.0093432	0.00899842	0.010207	0.00983039	0.0111093	0.0106993	0.0103045
3.9624	13	1.78712e+06	91394.3	85.3157	19.9464	1.82	2257.14	#REF!	5.97142	5.5	6099.31	5.69364	1.33114	55.9499	71.8411	92.2458	0.27975	7.91779		51.3344	3.81238	13.4324	37.9019		71.8411	100.806	5.12431	66.7168		71.8411	286.346	0.00516434	71.836		1.82		0.0102651	0.00988634	0.00952152	0.00917015	0.00883176	0.0100565	0.00819197	0.00788967	0.00898377	0.00865226	0.00981439	0.00945222	0.00910341
4.1148	13.5	1.8695e+06	82375.8	76.897	17.9781	1.84	2267.14	#REF!	6.03704	6	12384.4	11.5608	2.70284	58.6528	75.3117	96.7021	0.293264	8.21105		51.8153	3.33143	14.0262	37.7891		75.3117	97.3357	5.479	69.8327		75.3117	282.875	2.5575e-30	75.3117		1.84		0.00896832	0.00863737	0.00831864	0.00801166	0.00771602	0.0088209	0.00715705	0.00689294	0.00787996	0.00758918	0.00864161	0.00832272	0.0080156
4.2672	14	1.94369e+06	74188.9	69.2546	16.1914	1.86	2277.14	#REF!	6.10266	6	12384.4	11.5608	2.70284	61.3556	78.7822	101.158	0.306778	8.51783		52.2452	2.90158	14.6352	37.61		78.7822	93.8652	5.84703	72.9351		78.7822	279.405	0.0052101	78.777		1.86		0.00780572	0.00751768	0.00724026	0.00697308	0.00671576	0.00770893	0.00622926	0.00599938	0.00688661	0.00663248	0.0075822	0.00730241	0.00703293
4.4196	14.5	2.03847e+06	94779	88.4753	20.6851	1.88	2287.14	#REF!	6.16828	6	12384.4	11.5608	2.70284	64.0585	82.2527	105.615	0.320292	8.83812		52.6281	2.51859	15.2594	37.3688		82.2527	90.3947	6.22855	76.0241		82.2527	275.934	0.0209319	82.2318		1.88		0.00676659	0.00651689	0.00627641	0.0060448	0.00582173	0.00671115	0.00539999	0.00520072	0.00599526	0.00577403	0.00662792	0.00638334	0.00614778
4.572	15	2.09532e+06	56852.8	53.0715	12.4078	1.9	2297.14	#REF!	6.2339	6	12384.4	11.5608	2.70284	66.7613	85.7232	110.071	0.333807	9.17193		52.9683	2.17845	15.899	37.0693		85.7232	86.9242	6.62369	79.0995		85.7232	272.464	0.0473027	85.6759		1.9		0.00584087	0.00562533	0.00541774	0.00521782	0.00502527	0.00581866	0.00466123	0.00448922	0.00519798	0.00500617	0.00577099	0.00555803	0.00535292
4.7244	15.5	2.16602e+06	70699.6	65.9974	15.4298	1.92	2307.14	#REF!	6.29952	6	12384.4	11.5608	2.70284	69.4642	89.1937	114.527	0.347321	9.51925		53.2694	1.87736	16.5541	36.7153		89.1937	83.4537	7.0326	82.1611		89.1937	268.993	0.0844598	89.1093		1.92		0.00501909	0.00483388	0.0046555	0.0044837	0.00431825	0.0050231	0.00400542	0.00385762	0.00448728	0.00432169	0.00500401	0.00481935	0.00464151
4.8768	16	2.22753e+06	61512.6	57.4214	13.4248	1.94	2317.14	#REF!	6.36514	6	12384.4	11.5608	2.70284	72.167	92.6643	118.983	0.360835	9.88008		53.535	1.61177	17.225	36.31		92.6643	79.9831	7.4554	85.2089		92.6643	265.523	0.13254	92.5317		1.94		0.0042924	0.004134	0.00398145	0.00383452	0.00369302	0.00431654	0.00342549	0.00329909	0.00385609	0.0037138	0.00431999	0.00416057	0.00400704
5.0292	16.5	2.28942e+06	61883.3	57.7675	13.5057	1.96	2327.14	#REF!	6.43076	6	12384.4	11.5608	2.70284	74.8698	96.1348	123.439	0.374349	10.2544		53.7684	1.37833	17.9116	35.8568		96.1348	76.5126	7.89224	88.2425		96.1348	262.052	0.191682	95.9431		1.96		0.00365242	0.00351764	0.00338783	0.00326281	0.00314241	0.00369151	0.00291477	0.00280721	0.00329773	0.00317604	0.00371227	0.00357528	0.00344335
[truncated: 113 more rows]
[truncated: 137 more columns]

## Sheet: Middletown_3
																																					0.00100109	0.000968217	0.000932488	0.000898078	0.000864937	0.00105242	0.000802279	0.000772673	0.000940161	0.000905468	0.00109636	0.00105591	0.00101694
[truncated: 185 more rows]
[truncated: 137 more columns]

[truncated: 52 more sheets: Middletown_4, Middletown_5, Middletown_6, Middletown_7, Norfolk_1, Norfolk_2, Norfolk_3, Norfolk_4, Norfolk_5, Norfolk_6, Norfolk_7, Norfolk_8, Norfolk_9, Norfolk_10, Wilmington_1, Wilmington_2, Wilmington_3, Wilmington_4, Wilmington_5, Wilmington_6 …]
