# Supplementary material for: Adapting to Sea Level Rise and Storms
Source: Research Square preprint supplement (doi:10.21203/rs.3.rs-7865982/v1), 2025-11-19
Supplement: Supplementary file 2 [file 9540b18513bf76ff1f947d2d.xlsx]

## Sheet: Property Value
Property
Value
	Segments	Bridgeport_1	Bridgeport_2	Bridgeport_3	Bridgeport_4	Bridgeport_5	Middletown_1	Middletown_2	Middletown_3	Middletown_4	Middletown_5	Middletown_6	Middletown_7	Norfolk_1	Norfolk_2	Norfolk_3	Norfolk_4	Norfolk_5	Norfolk_6	Norfolk_7	Norfolk_7	Norfolk_9	Norfolk_10	Jacksonville_1	Jacksonville_2	Jacksonville_3	Jacksonville_4	Jacksonville_5	Jacksonville_6	Jacksonville_7	Jacksonville_8	Jacksonville_9	Jacksonville_10	Jacksonville_11	Jacksonville_12	Jacksonville_13	Jacksonville_14	Jacksonville_15	Jacksonville_16	Jacksonville_17	Jacksonville_18	Jacksonville_19	Jacksonville_20	Jacksonville_21	Jacksonville_22	Jacksonville_23	Wilmington_1	Wilmington_2	Wilmington_3
Height	1.0668	0	0	0	0	0	0	0	0	0	0.393634	0	0	0	0	0	0	0	0	0	0	0	0	75.8751	218.415	0	0	0	0	0	0	0	0	0	0	0	0	0	0	0	15.4426	0	0	4.74459	0	0	0	0	0
Surge	1.2192	0	0	0	0	0	4.35364	9.24975	0	2.93355	3.54449	0	0	0	0	0	0	0	3.45701	0	0	0	0	54.2254	189.258	11.7506	0	0	0	0	0	0	5.6879	0	0	0	0	0	0	0	17.2589	0	0	13.244	0	0	4.37906	12.1994	0
(m)	1.3716	0	0	0	0	0	12.6945	8.97206	0	5.54268	10.49	0	0	0	0	0	0	45.092	4.34823	0	0	0	0	49.9757	85.8867	11.4881	0	0	0	0	0	0	5.52265	0	9.45086	0	0	0	0	0	8.03178	0	0	8.50631	0	0	5.23168	14.8967	3.67515
	1.524	0	0	0	0	0	7.92395	17.761	0	5.63304	13.62	0	0	0	0	0	0	54.0995	4.41793	0	0	0	6.61674	44.1011	58.5187	9.05013	0	0	0	50.6166	17.3774	0	6.49561	0	7.88913	0	0	0	0	327	7.24541	0	67.6534	6.27877	0	2993.56	5.70804	20.6993	4.28007
	1.6764	0	0	0	0	0	28.6663	19.9672	0	7.09783	12.9747	1.10277	0	0	0	0	0	35.5132	5.15501	69.7542	69.7542	0	11.7186	44.2015	50.0661	11.8421	0	1.43926	0	30.5914	8.26119	0	9.28127	37	7.83006	0	0	0	0	273	7.02591	0	72.0604	5.80886	0	2355.02	7.82365	11.508	4.09255
	1.8288	0	0	0	0.61036	2	54.0009	21.6227	10.3106	9.27155	8.65565	0.4718	0	0	0	0	0	19.2032	4.63441	62.5129	62.5129	0	11.4542	44.9744	46.248	13.3316	0.565919	2.94017	0	50.8321	5.93938	0	10.9571	40	7.40477	9.63051	3.04528	0	0	255	7.85396	0	71.5616	5.90512	13.4615	2261.26	6.70399	14.7349	3.57378
	1.9812	0	15.5985	0	1.46047	0	33.3758	26.71	12.0667	15.3621	8.4248	0.150277	0	0	0	0	0	18.0747	7.64555	46.8633	46.8633	11.5663	20.4701	44.8135	37.2711	15.1327	0.669224	3.62318	0	71.7423	5.19502	0	14.8239	39	8.54633	11.7806	2.7626	0	0	252	7.984	0	78.6072	7.52196	20.7728	2233.54	8.05243	23.0859	3.00669
	2.1336	0	14.5326	0	0.951039	0	29.0046	15.4671	15.2581	11.1361	6.40641	0.399564	0	374	0	0	0	15.6798	11.0346	55.368	55.368	11.9144	25.9708	46.4733	41.8857	18.1695	0.565919	6.70531	0	99.1712	7.77428	9.77428	17.5921	38	9.37284	14.2986	2.83498	0	76	238	10.904	58.3109	80.3719	7.22678	12.63	2314	6.8693	24.3223	3.82912
	2.286	0	20.5468	0	4.79906	0	115.139	23.8619	20.2329	16.6257	7.5279	0.593593	0	452	23.1287	134	0	16.6352	10.2801	43.2302	43.2302	21.0557	32.4174	49.6687	57.146	27.4546	0.669224	10.9645	0	118.988	8.94546	10.251	22.6	55	9.426	13.4178	3.71028	0	79	294	17.8205	61.3651	106.546	8.77018	25.5471	2688.88	8.6094	18.0559	3.41484
	2.4384	11.7844	25.1459	5.15697	12.6428	13	63.2171	19.3361	19.7806	16.388	7.11823	0.394798	1.83393	514	29.3339	162	357.032	8.60326	18.7212	51.9874	51.9874	25.2804	31.8032	52.3194	63.1676	29.0747	0.729179	16.198	6.59983	128.394	12.4221	18.6296	31.4617	80	12.4052	14.2874	3.79892	16.4353	189	278	21.9609	54.4078	104.214	10.4207	69.3897	3017.05	8.84989	22.8657	2.67511
	2.5908	25.1495	46.1532	13.837	7.55299	17	42.1158	23.9101	21.9136	15.1638	6.8498	0.708873	1.16948	611	40.1705	203	411.4	8.7864	22.5789	34.4748	34.4748	39.9546	31.3954	67.3592	66.6318	39.7372	0	25.5601	7.03443	359.719	18.9221	25.7142	49.4803	97	95.2669	16.0433	5.43572	18.7296	122	344	22.038	64.8527	138.542	15.3364	40.5703	3786.31	10.1936	20.2147	2.52587
	2.7432	45.5458	34.8727	14.559	9.97396	53	43.2003	22.3257	21.0355	15.7874	6.16967	0.469277	9.83453	711	50.5306	223	476.948	8.7601	22.088	41.5601	41.5601	46.0001	33.232	212.569	104.199	61.7372	2.86232	34.7431	12.7122	457.4	91.2843	129.056	365.189	172	0	30.0623	6.68644	26.3374	68	504	35.0745	112.992	390.091	20.694	97.1105	15093.2	11.1343	15.9364	3.05027
	2.8956	31.0684	24.6311	7.39854	19.0214	49	38.6679	20.9559	22.9391	15.3277	3.33991	0.865205	0.735328	777	61.9789	262	470.221	7.57116	31.1662	40.0264	40.0264	53.1397	38.2219	103.349	88.7255	48.2816	2.46294	25.0952	10.0448	641.321	121.617	30.7208	111.169	123	30.1569	38.1261	8.1816	22.9178	91	449	14.569	75.1961	333.474	14.6541	210.711	6296.97	12.683	16.7286	3.37922
	3.048	78.6228	22.9307	6.19078	14.1053	44	36.828	16.9679	26.1255	16.1265	2.20961	0.865159	3.82588	886	81.9665	288	466.072	6.30004	40.8012	39.1671	39.1671	60.5685	30.5977	66.865	73.1089	43.5194	2.5456	21.8283	13.9899	392.859	35.6647	20.9085	80.62	73	24.3616	39.0947	7.89906	57.6261	303	441	13.9151	54.8657	233.045	17.1224	124.827	2953.77	12.5424	18.0147	5.70998
	3.2004	61.096	16.7815	6.30787	16.6703	44	35.9397	17.4998	31.7454	15.0877	1.34515	0.777213	1.66414	804	120.351	345	573.077	5.19382	57.3054	38.7715	38.7715	57.7166	41.267	55.3482	75.0393	71.7943	2.71994	22.0509	15.2515	483.41	26.1859	-36.6222	69.4316	48	20.5564	36.0734	7.76351	0	324	385	20.8112	66.4413	194.191	17.0572	122.708	1998.37	12.7235	13.6127	4.21824
	3.3528	83.18	16.5374	9.38396	15.5928	36	33.1791	20.8476	25.2201	12.5254	1.79955	0.482285	1.57995	725	143.432	390	607.593	4.13419	84.0198	43.1258	43.1258	67.412	47.9602	48.719	77.5629	30.6794	0	20.7124	11.6169	0	19.9477	76.4454	68.2393	42	18.7547	17.7038	6.77592	19.7533	0	372	22.2869	57.2005	163.953	16.1894	129.64	1684.08	10.1515	18.5254	5.28437
	3.5052	51.6851	9.88318	7.2952	10.7729	35	33.863	22.6087	16.7748	8.55946	2.17396	1.06301	1.54541	607	170.199	435	588.228	1.39541	109.014	44.7651	44.7651	66.6743	51.1382	41.3195	75.9529	0	2.94509	19.9921	12.6863	153.733	18.4293	16.3383	58.4739	36	17.7116	8.67006	7.65879	20.07	116	364	23.1576	54.7529	138.603	16.7392	84.6198	1257.27	11.5662	24.7459	3.62918
	3.6576	37.8038	10.358	7.85149	11.4766	25	23.5652	19.9643	22.7487	12.6075	0.408397	0.121176	2.95643	554	133.929	442	608.861	4.01155	116.014	34.9048	34.9048	74.7122	45.6656	0	73.0816	58.2985	3.74792	0	13.6837	131.082	14.5727	19.4888	50.807	37	19.3687	23.9884	6.44485	23.8963	125	363	23.605	52.9637	135.375	11.2534	90.1381	1050.96	9.49616	18.2416	5.59231
		Bridgeport	Middletown	Norfolk	Jacksonville	Wilmington	Total
Height	1.0668	0	0.393634	0	314.478	0	314.871
Surge	1.2192	0	20.0814	3.45701	291.424	181.756	496.718
(m)	1.3716	0	37.6993	49.4403	178.862	279.234	545.236
	1.524	0	44.938	65.1341	3595.79	432.771	4138.63
	1.6764	0	69.8088	191.895	2913.42	451.721	3626.85
	1.8288	2.61036	104.333	160.317	2850.92	414.895	3533.07
	1.9812	17.0589	96.0897	151.483	2855.78	452.566	3572.98
	2.1336	15.4836	77.6719	549.336	3110.06	373.775	4126.33
	2.286	25.3459	183.981	775.978	3670.17	218.395	4873.87
	2.4384	67.73	128.069	1250.75	4230.36	210.495	5887.4
	2.5908	109.693	111.831	1437.24	5426.28	176.241	7261.28
	2.7432	157.951	118.822	1654.68	18028	208.611	20168.1
	2.8956	131.119	102.831	1781.35	8890.74	193.837	11099.9
	3.048	165.85	102.949	1938.64	5095.43	136.175	7439.05
	3.2004	144.856	104.059	2081.45	4025.58	117.629	6473.58
	3.3528	160.694	95.6339	2155.8	2904.26	102.592	5418.98
	3.5052	114.636	86.5883	2118.18	2545.12	120.109	4984.63
	3.6576	92.4899	82.3717	2049	2327.76	125.393	4677.01
	Total	1205.52	1568.15	18414.1	73254.5	4196.19	98638.5
[truncated: 5 more columns]

## Sheet: SUMMARY
CRESS2.2	Interest rate	0.0426
Low	Growth rate	0.005
2030		1	2	3	4	5	6	7	8	9	10	11	12	13	14	15	16	17	18	19	20	21	22	23	24	25	26	27	28	29	30	31	32	33	34	35	36	37	38	39	40	41	42	43	44	45	46	47	48
	Segments	Bridgeport_1	Bridgeport_2	Bridgeport_3	Bridgeport_4	Bridgeport_5	Middletown_1	Middletown_2	Middletown_3	Middletown_4	Middletown_5	Middletown_6	Middletown_7	Norfolk_1	Norfolk_2	Norfolk_3	Norfolk_4	Norfolk_5	Norfolk_6	Norfolk_7	Norfolk_8	Norfolk_9	Norfolk_10	Jacksonville_1	Jacksonville_2	Jacksonville_3	Jacksonville_4	Jacksonville_5	Jacksonville_6	Jacksonville_7	Jacksonville_8	Jacksonville_9	Jacksonville_10	Jacksonville_11	Jacksonville_12	Jacksonville_13	Jacksonville_14	Jacksonville_15	Jacksonville_16	Jacksonville_17	Jacksonville_18	Jacksonville_19	Jacksonville_20	Jacksonville_21	Jacksonville_22	Jacksonville_23	Wilmington_1	Wilmington_2	Wilmington_3
	Average Elevation of Wall	1.1	1.1	1.1	1.1	1.1	0.78	0.78	0.78	0.78	0.78	0.78	0.78	0.39	0.39	0.39	0.39	0.39	0.39	0.39	0.39	0.39	0.39	0.6	0.6	0.6	0.6	0.6	0.6	0.6	0.6	0.6	0.6	0.6	0.6	0.6	0.6	0.6	0.6	0.6	0.6	0.6	0.6	0.6	0.6	0.6	0.68	0.68	0.68
	Average height of Walls (m)	#VALUE!	#VALUE!	#VALUE!	#VALUE!	#VALUE!	1.72	1.42	#VALUE!	0.82	1.04	#VALUE!	#VALUE!	#VALUE!	#VALUE!	#VALUE!	#VALUE!	1.91	#VALUE!	2.01	#REF!	#VALUE!	1.69	#VALUE!	#VALUE!	#VALUE!	#VALUE!	#VALUE!	#VALUE!	#VALUE!	#VALUE!	#VALUE!	#VALUE!	#VALUE!	#VALUE!	#VALUE!	#VALUE!	#VALUE!	#VALUE!	#VALUE!	#VALUE!	#VALUE!	#VALUE!	#VALUE!	#VALUE!	#VALUE!	#VALUE!	#VALUE!	#VALUE!
	Wall Length (m)	No_Wall	No_Wall	No_Wall	No_Wall	No_Wall	2426.13	2333.58	No_Wall	2512.45	2606.43	No_Wall	No_Wall	No_Wall	No_Wall	No_Wall	No_Wall	40.4306	No_Wall	7432.19	#REF!	No_Wall	3468.36	No_Wall	No_Wall	No_Wall	No_Wall	No_Wall	No_Wall	No_Wall	No_Wall	No_Wall	No_Wall	No_Wall	No_Wall	No_Wall	No_Wall	No_Wall	No_Wall	No_Wall	No_Wall	No_Wall	No_Wall	No_Wall	No_Wall	No_Wall	No_Wall	No_Wall	No_Wall
	Residual Dam (million $, PV)	9.24287	33.8374	1.77445	6.71251	9.58629	7.33439	7.60865	2.56199	26.462	24.2262	0.569262	0.00133316	64.2354	2.54375	11.5936	9.12251	11.5665	43.2275	32.5272	1.7	15.3697	41.3712	52.0804	151.291	1.90479	0.000492581	0.00668731	3.93681e-06	0.607231	0.190863	0.000372019	0.954878	0.134897	0.385759	0.00860111	0.00251794	9.81711e-06	0.00291409	4.03399	9.79824	0.00218626	0.894794	4.20989	0.0125016	36.4803	22.6074	57.2558	6.10353
	Expected Benefit (million $, PV)	No_Wall	No_Wall	No_Wall	No_Wall	No_Wall	186.447	90.6793	No_Wall	11.6951	41.0228	No_Wall	No_Wall	No_Wall	No_Wall	No_Wall	No_Wall	205.527	No_Wall	308.544	#REF!	No_Wall	64.3952	No_Wall	No_Wall	No_Wall	No_Wall	No_Wall	No_Wall	No_Wall	No_Wall	No_Wall	No_Wall	No_Wall	No_Wall	No_Wall	No_Wall	No_Wall	No_Wall	No_Wall	No_Wall	No_Wall	No_Wall	No_Wall	No_Wall	No_Wall	No_Wall	No_Wall	No_Wall
	Wall Cost (million $,PV)	No_Wall	No_Wall	No_Wall	No_Wall	No_Wall	41.0551	26.9151	No_Wall	9.66322	16.1253	No_Wall	No_Wall	No_Wall	No_Wall	No_Wall	No_Wall	40.4306	No_Wall	171.753	#REF!	No_Wall	56.6622	No_Wall	No_Wall	No_Wall	No_Wall	No_Wall	No_Wall	No_Wall	No_Wall	No_Wall	No_Wall	No_Wall	No_Wall	No_Wall	No_Wall	No_Wall	No_Wall	No_Wall	No_Wall	No_Wall	No_Wall	No_Wall	No_Wall	No_Wall	No_Wall	No_Wall	No_Wall
	Net Benefit	#VALUE!	#VALUE!	#VALUE!	#VALUE!	#VALUE!	145.392	63.7642	#VALUE!	2.0319	24.8975	#VALUE!	#VALUE!	#VALUE!	#VALUE!	#VALUE!	#VALUE!	165.096	#VALUE!	136.791	#REF!	#VALUE!	7.73299	#VALUE!	#VALUE!	#VALUE!	#VALUE!	#VALUE!	#VALUE!	#VALUE!	#VALUE!	#VALUE!	#VALUE!	#VALUE!	#VALUE!	#VALUE!	#VALUE!	#VALUE!	#VALUE!	#VALUE!	#VALUE!	#VALUE!	#VALUE!	#VALUE!	#VALUE!	#VALUE!	#VALUE!	#VALUE!	#VALUE!
	Total cost (million $, PV)	9.24287	33.8374	1.77445	6.71251	9.58629	48.3895	34.5238	2.56199	36.1253	40.3516	0.569262	0.00133316	64.2354	2.54375	11.5936	9.12251	51.9971	43.2275	204.28	#REF!	15.3697	98.0334	52.0804	151.291	1.90479	0.000492581	0.00668731	3.93681e-06	0.607231	0.190863	0.000372019	0.954878	0.134897	0.385759	0.00860111	0.00251794	9.81711e-06	0.00291409	4.03399	9.79824	0.00218626	0.894794	4.20989	0.0125016	36.4803	22.6074	57.2558	6.10353
	% removed	0	0	0	0	0	0.962151	0.922588	0	0.306499	0.628711	0	0	0	0	0	0	0.946721	0	0.904632	-0.0179641	0	0.608844	0	0	0	0	0	0	0	0	0	0	0	0	0	0	0	0	0	0	0	0	0	0	0	0	0	0
	B/C	#VALUE!	#VALUE!	#VALUE!	#VALUE!	#VALUE!	4.54139	3.36908	#VALUE!	1.21027	2.544	#VALUE!	#VALUE!	#VALUE!	#VALUE!	#VALUE!	#VALUE!	5.08344	#VALUE!	1.79644	#REF!	#VALUE!	1.13648	#VALUE!	#VALUE!	#VALUE!	#VALUE!	#VALUE!	#VALUE!	#VALUE!	#VALUE!	#VALUE!	#VALUE!	#VALUE!	#VALUE!	#VALUE!	#VALUE!	#VALUE!	#VALUE!	#VALUE!	#VALUE!	#VALUE!	#VALUE!	#VALUE!	#VALUE!	#VALUE!	#VALUE!	#VALUE!	#VALUE!
	Expected Damage	9.24287	33.8374	1.77445	6.71251	9.58629	193.782	98.288	2.56199	38.1572	65.2491	0.569262	0.00133316	64.2354	2.54375	11.5936	9.12251	217.093	43.2275	341.072	1.67	15.3697	105.766	52.0804	151.291	1.90479	0.000492581	0.00668731	3.93681e-06	0.607231	0.190863	0.000372019	0.954878	0.134897	0.385759	0.00860111	0.00251794	9.81711e-06	0.00291409	4.03399	9.79824	0.00218626	0.894794	4.20989	0.0125016	36.4803	22.6074	57.2558	6.10353
	Top of Wall	No_Wall	No_Wall	No_Wall	No_Wall	No_Wall	2.5	2.2	No_Wall	1.6	1.82	No_Wall	No_Wall	No_Wall	No_Wall	No_Wall	No_Wall	2.3	No_Wall	2.4	#REF!	No_Wall	2.08	No_Wall	No_Wall	No_Wall	No_Wall	No_Wall	No_Wall	No_Wall	No_Wall	No_Wall	No_Wall	No_Wall	No_Wall	No_Wall	No_Wall	No_Wall	No_Wall	No_Wall	No_Wall	No_Wall	No_Wall	No_Wall	No_Wall	No_Wall	No_Wall	No_Wall	No_Wall
	Cost/ Wall length (M$/km)	#VALUE!	#VALUE!	#VALUE!	#VALUE!	#VALUE!	16.922	11.5338	#VALUE!	3.84613	6.18675	#VALUE!	#VALUE!	#VALUE!	#VALUE!	#VALUE!	#VALUE!	1000	#VALUE!	23.1094	#REF!	#VALUE!	16.3369	#VALUE!	#VALUE!	#VALUE!	#VALUE!	#VALUE!	#VALUE!	#VALUE!	#VALUE!	#VALUE!	#VALUE!	#VALUE!	#VALUE!	#VALUE!	#VALUE!	#VALUE!	#VALUE!	#VALUE!	#VALUE!	#VALUE!	#VALUE!	#VALUE!	#VALUE!	#VALUE!	#VALUE!	#VALUE!	#VALUE!
	Coastal length	8045	5050	3233	4391	2183	2767.85	3348.84	1372.98	5742.99	6185.48	2825.1	5388.62	2874.88	2013.72	5895	6375	2951	7339	8494	13818	16793	12805	42210	56507	11643.1	2876.1	6030	3419	19075	99037	3725.16	14902.4	11415.9	13767.7	7192.54	2842.68	1011.61	17329.7	46378	18673.1	21793.8	43735.6	9072.93	20223.8	125369	8200.82	15909.1	9573.73
	E[Damage]/Coastal Length	1.1489	6.70048	0.548855	1.5287	4.39134	70.0116	29.3499	1.866	6.64413	10.5487	0.201501	0.000247402	22.3437	1.26321	1.96668	1.43098	73.5659	5.89011	40.1544	0.120857	0.915245	8.25977	1.23384	2.67739	0.163599	0.000171267	0.00110901	1.15145e-06	0.0318339	0.00192719	9.98666e-05	0.0640756	0.0118166	0.0280191	0.00119584	0.000885763	9.70447e-06	0.000168156	0.0869806	0.524725	0.000100315	0.0204592	0.464005	0.000618161	0.290984	2.75673	3.59893	0.637529
2080	E[damage]	1	2	3	4	5	6	7	8	9	10	11	12	13	14	15	16	17	18	19	20	21	22	23	24	25	26	27	28	29	30	31	32	33	34	35	36	37	38	39	40	41	42	43	44	45	46	47	48
	Segments	Bridgeport_1	Bridgeport_2	Bridgeport_3	Bridgeport_4	Bridgeport_5	Middletown_1	Middletown_2	Middletown_3	Middletown_4	Middletown_5	Middletown_6	Middletown_7	Norfolk_1	Norfolk_2	Norfolk_3	Norfolk_4	Norfolk_5	Norfolk_6	Norfolk_7	Norfolk_8	Norfolk_9	Norfolk_10	Jacksonville_1	Jacksonville_2	Jacksonville_3	Jacksonville_4	Jacksonville_5	Jacksonville_6	Jacksonville_7	Jacksonville_8	Jacksonville_9	Jacksonville_10	Jacksonville_11	Jacksonville_12	Jacksonville_13	Jacksonville_14	Jacksonville_15	Jacksonville_16	Jacksonville_17	Jacksonville_18	Jacksonville_19	Jacksonville_20	Jacksonville_21	Jacksonville_22	Jacksonville_23	Wilmington_1	Wilmington_2	Wilmington_3
	Average Elevation of Wall	1.316	1.316	1.316	1.316	1.316	0.996	0.996	0.996	0.996	0.996	0.996	0.996	0.606	0.606	0.606	0.606	0.606	0.606	0.606	0.61	0.606	0.606	0.82	0.82	0.82	0.82	0.82	0.82	0.82	0.82	0.82	0.82	0.82	0.82	0.82	0.82	0.82	0.82	0.82	0.82	0.82	0.82	0.82	0.82	0.82	0.896	0.896	0.896
	Average height of Walls (m)	#VALUE!	1.484	#VALUE!	0.944	1.044	1.864	1.564	1.484	1.144	0.944	#VALUE!	#VALUE!	2.494	#VALUE!	#VALUE!	#VALUE!	1.814	0.794	2.194	#REF!	#VALUE!	1.814	0.78	0.76	0.72	#VALUE!	#VALUE!	#VALUE!	#VALUE!	#VALUE!	#VALUE!	#VALUE!	#VALUE!	#VALUE!	#VALUE!	#VALUE!	#VALUE!	#VALUE!	#VALUE!	0.54	#VALUE!	#VALUE!	0.78	#VALUE!	#VALUE!	0.504	0.624	#VALUE!
	Wall Length (m)	No_Wall	4229.24	No_Wall	1576.53	992.361	2549.69	2654.21	745.877	4148.22	3094.65	No_Wall	No_Wall	2718.19	No_Wall	No_Wall	No_Wall	2044.52	1966.17	7831.14	#REF!	No_Wall	5084.2	27412.8	44193.2	4475.67	No_Wall	No_Wall	No_Wall	No_Wall	No_Wall	No_Wall	No_Wall	No_Wall	No_Wall	No_Wall	No_Wall	No_Wall	No_Wall	No_Wall	12181.2	No_Wall	No_Wall	3212.31	No_Wall	No_Wall	5534.02	11221	No_Wall
	Residual Dam (million $, PV)	33.7136	32.25	6.43877	20.4874	22.469	7.36263	8.41933	3.9645	30.8285	35.36	2.88973	0.0352538	9.49976	19.862	105.822	103.202	24.273	73.6284	31.6813	10.7	109.19	312.583	42.7478	109.142	7.27664	0.00541727	0.0657771	0.000177971	5.17402	1.59213	0.00631289	15.5056	1.25236	4.98049	0.0954443	0.0275344	0.000445938	0.0495873	34.0782	20.9853	0.0359501	7.61964	5.5923	0.139773	307.978	31.916	59.7093	21.7574
	Expected Benefit (million $, PV)	No_Wall	124.089	No_Wall	8.5481	17.7822	379.762	156.158	15.9722	47.2328	47.5146	No_Wall	No_Wall	574.212	No_Wall	No_Wall	No_Wall	212.901	8.90972	421.761	#REF!	No_Wall	140.451	205.194	518.639	24.2298	No_Wall	No_Wall	No_Wall	No_Wall	No_Wall	No_Wall	No_Wall	No_Wall	No_Wall	No_Wall	No_Wall	No_Wall	No_Wall	No_Wall	30.1277	No_Wall	No_Wall	29.1717	No_Wall	No_Wall	11.0377	45.7621	No_Wall
	Wall Cost (million $,PV)	No_Wall	53.2753	No_Wall	8.03602	6.18681	50.6728	37.1368	9.39574	31.0535	15.7744	No_Wall	No_Wall	96.7094	No_Wall	No_Wall	No_Wall	38.4824	7.09021	215.623	#REF!	No_Wall	95.6959	95.398	146.009	13.2715	No_Wall	No_Wall	No_Wall	No_Wall	No_Wall	No_Wall	No_Wall	No_Wall	No_Wall	No_Wall	No_Wall	No_Wall	No_Wall	No_Wall	20.3176	No_Wall	No_Wall	11.179	No_Wall	No_Wall	8.04078	24.9917	No_Wall
	Net Benefit	#VALUE!	70.8136	#VALUE!	0.512082	11.5954	329.089	119.022	6.5765	16.1793	31.7402	#VALUE!	#VALUE!	477.502	#VALUE!	#VALUE!	#VALUE!	174.418	1.81952	206.139	#REF!	#VALUE!	44.7552	109.796	372.631	10.9583	#VALUE!	#VALUE!	#VALUE!	#VALUE!	#VALUE!	#VALUE!	#VALUE!	#VALUE!	#VALUE!	#VALUE!	#VALUE!	#VALUE!	#VALUE!	#VALUE!	9.81005	#VALUE!	#VALUE!	17.9928	#VALUE!	#VALUE!	2.99697	20.7704	#VALUE!
	Total cost (million $, PV)	33.7136	85.5252	6.43877	28.5234	28.6558	58.0354	45.5561	13.3602	61.8819	51.1343	2.88973	0.0352538	106.209	19.862	105.822	103.202	62.7554	80.7186	247.304	#REF!	109.19	408.279	138.146	255.151	20.5481	0.00541727	0.0657771	0.000177971	5.17402	1.59213	0.00631289	15.5056	1.25236	4.98049	0.0954443	0.0275344	0.000445938	0.0495873	34.0782	41.303	0.0359501	7.61964	16.7713	0.139773	307.978	39.9568	84.7009	21.7574
	% removed	0	0.793718	0	0.294402	0.44178	0.980981	0.948843	0.801146	0.605074	0.573331	0	0	0.983725	0	0	0	0.897657	0.107947	0.930132	0	0	0.310023	0.827589	0.826146	0.769043	0	0	0	0	0	0	0	0	0	0	0	0	0	0	0.589433	0	0	0.839136	0	0	0.256968	0.433882	0
	B/C	#VALUE!	2.3292	#VALUE!	1.06372	2.87421	7.49439	4.20495	1.69994	1.52102	3.01214	#VALUE!	#VALUE!	5.9375	#VALUE!	#VALUE!	#VALUE!	5.53242	1.25662	1.95602	#REF!	#VALUE!	1.46768	2.15093	3.55211	1.82571	#VALUE!	#VALUE!	#VALUE!	#VALUE!	#VALUE!	#VALUE!	#VALUE!	#VALUE!	#VALUE!	#VALUE!	#VALUE!	#VALUE!	#VALUE!	#VALUE!	1.48283	#VALUE!	#VALUE!	2.60952	#VALUE!	#VALUE!	1.37272	1.83109	#VALUE!
	Expected Damage	33.7136	156.339	6.43877	29.0355	40.2512	387.124	164.578	19.9367	78.0613	82.8745	2.88973	0.0352538	583.711	19.862	105.822	103.202	237.174	82.5381	453.443	10.67	109.19	453.034	247.942	627.781	31.5065	0.00541727	0.0657771	0.000177971	5.17402	1.59213	0.00631289	15.5056	1.25236	4.98049	0.0954443	0.0275344	0.000445938	0.0495873	34.0782	51.113	0.0359501	7.61964	34.764	0.139773	307.978	42.9537	105.471	21.7574
	Top of Wall	No_Wall	2.8	No_Wall	2.26	2.36	2.86	2.56	2.48	2.14	1.94	No_Wall	No_Wall	3.1	No_Wall	No_Wall	No_Wall	2.42	1.4	2.8	#REF!	No_Wall	2.42	1.6	1.58	1.54	No_Wall	No_Wall	No_Wall	No_Wall	No_Wall	No_Wall	No_Wall	No_Wall	No_Wall	No_Wall	No_Wall	No_Wall	No_Wall	No_Wall	1.36	No_Wall	No_Wall	1.6	No_Wall	No_Wall	1.4	1.52	No_Wall
	Cost/ Wall length	#VALUE!	12.5969	#VALUE!	5.0973	6.23443	19.8741	13.9917	12.5969	7.48597	5.0973	#VALUE!	#VALUE!	35.5786	#VALUE!	#VALUE!	#VALUE!	18.8222	3.60609	27.534	#REF!	#VALUE!	18.8222	3.48005	3.30387	2.96525	#VALUE!	#VALUE!	#VALUE!	#VALUE!	#VALUE!	#VALUE!	#VALUE!	#VALUE!	#VALUE!	#VALUE!	#VALUE!	#VALUE!	#VALUE!	#VALUE!	1.66795	#VALUE!	#VALUE!	3.48005	#VALUE!	#VALUE!	1.45297	2.22723	#VALUE!
	Coastal Length	8045	5050	3233	4391	2183	2767.85	3348.84	1372.98	5742.99	6185.48	2825.1	5388.62	2874.88	2013.72	5895	6375	2951	7339	8494	13818	16793	12805	42210	56507	11643.1	2876.1	6030	3419	19075	99037	3725.16	14902.4	11415.9	13767.7	7192.54	2842.68	1011.61	17329.7	46378	18673.1	21793.8	43735.6	9072.93	20223.8	125369	8200.82	15909.1	9573.73
	E[Damage]/Coastal Length	4.19063	30.9582	1.99158	6.6125	18.4385	139.865	49.1447	14.5207	13.5924	13.3982	1.02288	0.00654226	203.039	9.86333	17.9511	16.1886	80.3707	11.2465	53.3839	0.772181	6.50212	35.3795	5.87401	11.1098	2.70603	0.00188355	0.0109083	5.20535e-05	0.271246	0.0160761	0.00169466	1.04048	0.109703	0.361751	0.0132699	0.00968607	0.000440821	0.0028614	0.734793	2.73726	0.00164955	0.17422	3.83162	0.00691128	2.45658	5.23774	6.62962	2.27262
2130		1	2	3	4	5	6	7	8	9	10	11	12	13	14	15	16	17	18	19	20	21	22	23	24	25	26	27	28	29	30	31	32	33	34	35	36	37	38	39	40	41	42	43	44	45	46	47	48
	Segments	Bridgeport_1	Bridgeport_2	Bridgeport_3	Bridgeport_4	Bridgeport_5	Middletown_1	Middletown_2	Middletown_3	Middletown_4	Middletown_5	Middletown_6	Middletown_7	Norfolk_1	Norfolk_2	Norfolk_3	Norfolk_4	Norfolk_5	Norfolk_6	Norfolk_7	Norfolk_8	Norfolk_9	Norfolk_10	Jacksonville_1	Jacksonville_2	Jacksonville_3	Jacksonville_4	Jacksonville_5	Jacksonville_6	Jacksonville_7	Jacksonville_8	Jacksonville_9	Jacksonville_10	Jacksonville_11	Jacksonville_12	Jacksonville_13	Jacksonville_14	Jacksonville_15	Jacksonville_16	Jacksonville_17	Jacksonville_18	Jacksonville_19	Jacksonville_20	Jacksonville_21	Jacksonville_22	Jacksonville_23	Wilmington_1	Wilmington_2	Wilmington_3
	Average Elevation of Wall	1.576	1.576	1.576	1.576	1.576	1.256	1.256	1.256	1.256	1.256	1.256	1.256	0.866	0.866	0.866	0.866	0.866	0.866	0.866	#REF!	0.866	0.866	1.08	1.08	1.08	1.08	1.08	1.08	1.08	1.08	1.08	1.08	1.08	1.08	1.08	1.08	1.08	1.08	1.08	1.08	1.08	1.08	1.08	1.08	1.08	1.156	1.156	1.156
	Average height of Walls (m)	1.444	1.684	#VALUE!	1.364	1.724	1.984	1.704	1.664	1.524	0.864	#VALUE!	#VALUE!	2.674	1.414	2.374	2.414	1.674	0.774	2.354	#REF!	#VALUE!	1.634	0.72	0.58	0.84	#VALUE!	#VALUE!	#VALUE!	0.8	0.74	#VALUE!	0.8	#VALUE!	0.62	#VALUE!	#VALUE!	#VALUE!	#VALUE!	0.92	0.34	#VALUE!	0.76	0.72	#VALUE!	1.14	0.544	0.964	0.324
	Wall Length (m)	6445.01	4728.45	No_Wall	3136.1	1890.28	2660.85	2979.2	1106.37	5095.59	3755.46	No_Wall	No_Wall	2822.77	1737.97	5552.8	5959.04	2147.44	2729.51	8180.02	#REF!	No_Wall	5558.16	29809.9	44930.6	5621.55	No_Wall	No_Wall	No_Wall	10950.6	4377.06	No_Wall	5286.54	No_Wall	5247.44	No_Wall	No_Wall	No_Wall	No_Wall	33686.2	12389.5	No_Wall	25741.8	3671	No_Wall	97769.9	6119.74	12966.5	6843.49
	Residual Dam (million $, PV)	60.3232	33.4446	30.7138	26.7735	20.3967	7.11477	7.74395	4.32187	15.6107	39.2276	4.51447	0.644771	0	0.0522992	21.5327	25.5321	32.6974	138.146	28.9332	25.87	294.784	297.257	102.546	184.723	11.1694	0.0648747	1.01545	0.00645026	23.8842	8.48175	0.116885	8.69284	20.3389	15.8304	1.15326	0.328341	0.0160075	0.849277	84.6258	37.5685	0.598105	45.4647	13.7459	1.71465	246.501	38.0581	42.8815	23.5946
	Expected Benefit (million $, PV)	110.158	1095.15	No_Wall	158.029	177.173	503.953	215.319	105.806	109.622	58.1033	No_Wall	No_Wall	3657.99	23.0764	653.682	966.121	219.491	16.6418	528.939	#REF!	No_Wall	156.149	262.854	552.078	52.2671	No_Wall	No_Wall	No_Wall	91.0785	25.6386	No_Wall	30.97	No_Wall	19.2975	No_Wall	No_Wall	No_Wall	No_Wall	734.393	33.1396	No_Wall	143.841	37.0656	No_Wall	7077.9	24.8184	119.413	6.8852
	Wall Cost (million $,PV)	79.6647	79.4898	No_Wall	34.5881	33.3049	59.91	49.4807	17.5228	67.6956	16.0357	No_Wall	No_Wall	115.45	19.8764	179.007	198.631	34.4214	9.35325	259.277	#REF!	No_Wall	84.885	88.3939	86.4559	22.6888	No_Wall	No_Wall	No_Wall	40.088	13.7102	No_Wall	19.353	No_Wall	11.5379	No_Wall	No_Wall	No_Wall	No_Wall	163.089	8.19236	No_Wall	85.0477	10.8854	No_Wall	726.793	10.3592	68.9243	4.10926
	Net Benefit	30.4932	1015.66	#VALUE!	123.441	143.868	444.043	165.838	88.2836	41.9263	42.0676	#VALUE!	#VALUE!	3542.54	3.19999	474.675	767.49	185.069	7.2885	269.662	#REF!	#VALUE!	71.2638	174.46	465.623	29.5783	#VALUE!	#VALUE!	#VALUE!	50.9905	11.9284	#VALUE!	11.6171	#VALUE!	7.75961	#VALUE!	#VALUE!	#VALUE!	#VALUE!	571.304	24.9472	#VALUE!	58.7937	26.1802	#VALUE!	6351.1	14.4592	50.4889	2.77594
	Total cost (million $, PV)	139.988	112.934	30.7138	61.3616	53.7017	67.0248	57.2246	21.8447	83.3063	55.2632	4.51447	0.644771	115.45	19.9287	200.54	224.163	67.1189	147.499	288.21	#REF!	294.784	382.142	190.94	271.179	33.8582	0.0648747	1.01545	0.00645026	63.9722	22.1919	0.116885	28.0458	20.3389	27.3683	1.15326	0.328341	0.0160075	0.849277	247.714	45.7609	0.598105	130.512	24.6313	1.71465	973.293	48.4173	111.806	27.7039
	% removed	0.646159	0.970366	0	0.855124	0.896762	0.986079	0.965284	0.960756	0.875347	0.596967	0	0	1	0.997739	0.96811	0.974253	0.870345	0.107513	0.948136	0	0	0.344391	0.719359	0.74929	0.823928	0	0	0	0.792244	0.751416	0	0.780832	0	0.549349	0	0	0	0	0.896674	0.468682	0	0.759835	0.729472	0	0.966345	0.394717	0.73578	0.225894
	B/C	1.38277	13.7772	#VALUE!	4.56888	5.31973	8.41183	4.35158	6.03821	1.61934	3.62338	#VALUE!	#VALUE!	31.6846	1.16099	3.65171	4.8639	6.37657	1.77925	2.04006	#REF!	#VALUE!	1.83953	2.97366	6.38567	2.30365	#VALUE!	#VALUE!	#VALUE!	2.27196	1.87004	#VALUE!	1.60027	#VALUE!	1.67253	#VALUE!	#VALUE!	#VALUE!	#VALUE!	4.50303	4.04518	#VALUE!	1.6913	3.40507	#VALUE!	9.73853	2.39578	1.73253	1.67553
	Expected Damage	170.481	1128.59	30.7138	184.803	197.57	511.068	223.063	110.128	125.233	97.3308	4.51447	0.644771	3657.99	23.1287	675.214	991.653	252.188	154.788	557.872	25.87	294.784	453.405	365.4	736.802	63.4365	0.0648747	1.01545	0.00645026	114.963	34.1203	0.116885	39.6629	20.3389	35.1279	1.15326	0.328341	0.0160075	0.849277	819.019	70.7081	0.598105	189.306	50.8115	1.71465	7324.4	62.8765	162.295	30.4798
	Top of Wall	3.02	3.26	No_Wall	2.94	3.3	3.24	2.96	2.92	2.78	2.12	No_Wall	No_Wall	3.54	2.28	3.24	3.28	2.54	1.64	3.22	#REF!	No_Wall	2.5	1.8	1.66	1.92	No_Wall	No_Wall	No_Wall	1.88	1.82	No_Wall	1.88	No_Wall	1.7	No_Wall	No_Wall	No_Wall	No_Wall	2	1.42	No_Wall	1.84	1.8	No_Wall	2.22	1.7	2.12	1.48
	Cost/ Wall length	12.3607	16.811	#VALUE!	11.029	17.6191	22.5154	16.6087	15.8381	13.2851	4.26996	#VALUE!	#VALUE!	40.8996	11.4365	32.2372	33.3327	16.029	3.42671	31.6963	#REF!	#VALUE!	15.2721	2.96525	1.92421	4.03603	#VALUE!	#VALUE!	#VALUE!	3.6608	3.13227	#VALUE!	3.6608	#VALUE!	2.19877	#VALUE!	#VALUE!	#VALUE!	#VALUE!	4.84141	0.661232	#VALUE!	3.30387	2.96525	#VALUE!	7.43371	1.69275	5.31557	0.600463
	Coastal Length (m)	8045	5050	3233	4391	2183	2767.85	3348.84	1372.98	5742.99	6185.48	2825.1	5388.62	2874.88	2013.72	5895	6375	2951	7339	8494	13818	16793	12805	42210	56507	11643.1	2876.1	6030	3419	19075	99037	3725.16	14902.4	11415.9	13767.7	7192.54	2842.68	1011.61	17329.7	46378	18673.1	21793.8	43735.6	9072.93	20223.8	125369	8200.82	15909.1	9573.73
	E[Damage]/Coastal Length	21.1909	140.285	3.81775	22.9711	24.5581	63.5261	27.7269	13.689	15.5665	12.0983	0.561152	0.0801455	454.692	2.87492	83.9297	123.263	31.3472	19.2403	69.3439	3.21566	36.6419	56.3587	45.4195	91.5851	7.8852	0.00806397	0.126221	0.000801773	14.29	4.24118	0.0145289	4.93013	2.52814	4.36643	0.143351	0.040813	0.00198975	0.105566	101.805	8.78907	0.0743449	23.5309	6.31591	0.213132	910.429	7.8156	20.1734	3.78867
	Property Values	932.94	333.533	219.628	265.48	227.624	914.387	518.607	488.5	364.002	107.694	20.9683	54.3456	8387	0	0	0	0	0	0	#REF!	0	0	1392.14	3210.79	780.54	69.5233	489.028	429.211	5045.72	1138.78	670.41	1764.15	1067.1	825.979	695.42	204.31	758.988	7904	13325	625.241	1402.2	3466.12	520.573	6440.4	60759.1	0	0	0
12 foot wall
2030	Cost	761.202	441.716	335.13	432	223.864	233.201	316.458	130.487	509.539	561.971	269.399	467.627	232.676	162.817	489.876	535.126	252.642	614.633	694.17	#REF!	1424.31	1118.51	3549.1	4671.04	924.565	228.389	502.168	301.355	1632.72	775.509	295.811	1183.38	906.527	1093.28	571.153	225.734	80.3308	1376.14	3682.84	1482.81	1730.63	3473.01	720.473	1605.96	9955.42	705.614	1339.92	804.523
2080	Cost	773.49	445.099	344.482	440.646	229.724	265.866	367.263	150.642	583.945	646.186	312.756	534.012	236.003	165.012	500.842	549.494	262.097	630.47	704.248	#REF!	1467.55	1164.8	3614.55	4733.09	963.333	234.598	509.936	311.158	1670.78	792.461	305.796	1240.06	925.114	1123.43	596.367	231.664	85.7727	1408.08	3757.75	1509.87	1780.31	3544.8	754.271	1659.17	10126.8	717.511	1362.18	817.434
2130	Cost	796.426	453.952	359.511	455.643	239.241	307.549	433.258	176.439	679.198	754.162	368.935	618.781	239.822	167.518	513.206	565.567	272.934	648.189	715.743	#REF!	1514.73	1214.07	3688.02	4803.3	1008.01	241.539	518.675	322.082	1712.96	811.172	316.728	1301.69	945.692	1156.71	622.676	238.189	91.4204	1443.34	3842.97	1540.68	1836.79	3624.76	792.994	1719.16	10319.9	731.225	1387.88	832.355
[truncated: 6 more columns]

## Sheet: Bridgeport_1
																																			Annual	0.291618	0.29308	0.294549	0.324473	0.326099	0.327734	0.329377	0.331028	0.332687	0.366692	0.36853	0.370377	0.372234	0.3741
	INPUTS			ERROR CHECK																															YEAR-2030	0	1	2	3	4	5	6	7	8	9	10	11	12	13
	SPATIAL DATA					Surge height (m)	Wall Length (m)	sum of middleH * dL	Surge height (ft)	Rounding (ft)	Area (sq m)	Buildings	Building Values (million $)	Cum Value	Marginal Damage	Damage	2030	Expected Benefit (million $, PV)	Total Cost (million $, PV)	Residual Dam (million $, PV)	Net Benefit (million $, PV)	2080	Expected Benefit (million $, PV)	Total Cost (million $, PV)	Residual Dam (million $, PV)	Net Benefit (million $, PV)	2130	Expected Benefit (million $, PV)	Total Cost (million $, PV)	Residual Dam (million $, PV)	Net Benefit (million $, PV)		Surge height (m)		AGE	0	1	2	3	4	5	6	7	8	9	10	11	12	13
	City	Bridgeport				1.84	2326.83	#REF!	6.03704	6	0	0	0	0	0	0		0	7.28828	9.24287	-7.28828		0	3.65447	33.7136	-3.65447		0	0.96135	170.481	-0.96135		1.84			0	0	0	0	0	0	0	0	0	0	0	0	0	0
	Policy Year (base year: 2020)					1.86	2383.52	#REF!	6.10266	6	0	0	0	0	0	0		0	7.87486	9.24287	-7.87486		0	4.03472	33.7136	-4.03472		0	1.13963	170.481	-1.13963		1.86			0	0	0	0	0	0	0	0	0	0	0	0	0	0
	SLR rate (before policy)	3.14				1.88	2440.99	#REF!	6.16828	6	0	0	0	0	0	0		0	8.49478	9.24287	-8.49478		0	4.44141	33.7136	-4.44141		0	1.33728	170.481	-1.33728		1.88			0	0	0	0	0	0	0	0	0	0	0	0	0	0
	SLR rate (after policy)					1.9	2499.25	#REF!	6.2339	6	0	0	0	0	0	0		0	9.14927	9.24287	-9.14927		0	4.87564	33.7136	-4.87564		0	1.55528	170.481	-1.55528		1.9			0	0	0	0	0	0	0	0	0	0	0	0	0	0
	MHHW 2020	1.06				1.92	2558.31	#REF!	6.29952	6	0	0	0	0	0	0		0	9.8396	9.24287	-9.8396		0	5.33855	33.7136	-5.33855		0	1.79465	170.481	-1.79465		1.92			0	0	0	0	0	0	0	0	0	0	0	0	0	0
						1.94	2618.18	#REF!	6.36514	6	0	0	0	0	0	0		0	10.5671	9.24287	-10.5671		0	5.83129	33.7136	-5.83129		0	2.05641	170.481	-2.05641		1.94			0	0	0	0	0	0	0	0	0	0	0	0	0	0
						1.96	2678.87	#REF!	6.43076	6	0	0	0	0	0	0		0	11.333	9.24287	-11.333		0	6.35506	33.7136	-6.35506		0	2.34165	170.481	-2.34165		1.96			0	0	0	0	0	0	0	0	0	0	0	0	0	0
	GEV ESTIMATION					1.98	2740.38	#REF!	6.49638	6	0	0	0	0	0	0		0	12.1387	9.24287	-12.1387		0	6.91104	33.7136	-6.91104		0	2.65144	170.481	-2.65144		1.98			0	0	0	0	0	0	0	0	0	0	0	0	0	0
	μ (location)	1.845				2	2802.73	#REF!	6.562	6.5	0	0	0	0	0	0		0	12.9856	9.24287	-12.9856		0	7.50049	33.7136	-7.50049		0	2.9869	170.481	-2.9869		2			0	0	0	0	0	0	0	0	0	0	0	0	0	0
	σ (scale)	0.1544				2.02	2865.91	#REF!	6.62762	6.5	0	0	0	0	0	0		0	13.875	9.24287	-13.875		0	8.12464	33.7136	-8.12464		0	3.34917	170.481	-3.34917		2.02			0	0	0	0	0	0	0	0	0	0	0	0	0	0
	k (shape)	0.0752				2.04	2929.93	#REF!	6.69324	6.5	0	0	0	0	0	0		0	14.8084	9.24287	-14.8084		0	8.78478	33.7136	-8.78478		0	3.7394	170.481	-3.7394		2.04			0	0	0	0	0	0	0	0	0	0	0	0	0	0
						2.06	2994.8	#REF!	6.75886	6.5	0	0	0	0	0	0		0	15.7872	9.24287	-15.7872		0	9.4822	33.7136	-9.4822		0	4.15878	170.481	-4.15878		2.06			0	0	0	0	0	0	0	0	0	0	0	0	0	0
	Coefficients of the cost function					2.08	3060.5	#REF!	6.82448	6.5	0	0	0	0	0	0		0	16.8128	9.24287	-16.8128		0	10.2182	33.7136	-10.2182		0	4.60852	170.481	-4.60852		2.08			0	0	0	0	0	0	0	0	0	0	0	0	0	0
	coef1	0.700515				2.1	3127.03	#REF!	6.8901	6.5	0	0	0	0	0	0		0	17.8866	9.24287	-17.8866		0	10.9941	33.7136	-10.9941		0	5.08983	170.481	-5.08983		2.1			0	0	0	0	0	0	0	0	0	0	0	0	0	0
	coef2	0.000658776				2.12	3194.4	#REF!	6.95572	6.5	0	0	0	0	0	0		0	19.0102	9.24287	-19.0102		0	11.8113	33.7136	-11.8113		0	5.60397	170.481	-5.60397		2.12			0	0	0	0	0	0	0	0	0	0	0	0	0	0
	coef3	-8.75071e-08		Buildings exist under MHHW		2.14	3262.59	#REF!	7.02134	7	0	0	0	0	0	0		0	20.1848	9.24287	-20.1848		0	12.6711	33.7136	-12.6711		0	6.15217	170.481	-6.15217		2.14			0	0	0	0	0	0	0	0	0	0	0	0	0	0
	coef4	6.382e-12				2.16	3331.58	#REF!	7.08696	7	0	0	0	0	0	0		0	21.4121	9.24287	-21.4121		0	13.5747	33.7136	-13.5747		0	6.73573	170.481	-6.73573		2.16			0	0	0	0	0	0	0	0	0	0	0	0	0	0
	q	4.05553e+07				2.18	3401.37	#REF!	7.15258	7	0	0	0	0	0	0		0	22.6933	9.24287	-22.6933		0	14.5237	33.7136	-14.5237		0	7.3559	170.481	-7.3559		2.18			0	0	0	0	0	0	0	0	0	0	0	0	0	0
	Growth Rate	0.005	%/year			2.2	3471.93	#REF!	7.2182	7	0	0	0	0	0	0		0	24.0299	9.24287	-24.0299		0	15.5193	33.7136	-15.5193		0	8.01398	170.481	-8.01398		2.2			0	0	0	0	0	0	0	0	0	0	0	0	0	0
	discount rate	0.0426	%/year			2.22	3543.24	#REF!	7.28382	7	0	0	0	0	0	0		0	25.4233	9.24287	-25.4233		0	16.5628	33.7136	-16.5628		0	8.71125	170.481	-8.71125		2.22			0	0	0	0	0	0	0	0	0	0	0	0	0	0
	useful_life	30	years			2.24	3615.27	#REF!	7.34944	7	0	0	0	0	0	0		0	26.8749	9.24287	-26.8749		0	17.6555	33.7136	-17.6555		0	9.44899	170.481	-9.44899		2.24			0	0	0	0	0	0	0	0	0	0	0	0	0	0
	CapEx	0.005				2.26	3688	#REF!	7.41506	7	0	0	0	0	0	0		0	28.3859	9.24287	-28.3859		0	18.7988	33.7136	-18.7988		0	10.2285	170.481	-10.2285		2.26			0	0	0	0	0	0	0	0	0	0	0	0	0	0
	Difference	0.02	meter			2.28	3761.39	#REF!	7.48068	7	0	0	0	0	0	0		0	29.9577	9.24287	-29.9577		0	19.9939	33.7136	-19.9939		0	11.051	170.481	-11.051		2.28			0	0	0	0	0	0	0	0	0	0	0	0	0	0
			ft			2.3	3835.39	#REF!	7.5463	7.5	0	0	1.68348	1.68348	0.00841742	0.00841742		0.00415106	31.5914	9.23872	-31.5872		0.0192849	21.242	33.6943	-21.2228		0.270603	11.9178	170.21	-11.6472		2.3			0.00012849	0.000123749	0.000119182	0.000127204	0.00012251	0.000117989	0.000113635	0.000109442	0.000105403	0.000112337	0.000108192	0.000104199	0.000100354	9.6651e-05
	A factor to account for other damages than buildings	2				2.32	3909.98	#REF!	7.61192	7.5	0	0	1.68348	3.36697	0.0168348	0.0252523		0.0154476	33.2882	9.22742	-33.2727		0.0690545	22.5444	33.6446	-22.4753		0.93399	12.8301	169.547	-11.8961		2.32			0.000347434	0.000334613	0.000322265	0.000344352	0.000331645	0.000319407	0.00030762	0.000296268	0.000285335	0.000304542	0.000293303	0.00028248	0.000272056	0.000262017
	Basement	1	(1=basement; 0=No basement)			2.34	3985.09	#REF!	7.67754	7.5	0	0	1.68348	5.05045	0.0252523	0.0505045		0.0359215	35.0492	9.20695	-35.0132		0.155363	23.902	33.5583	-23.7466		2.0258	13.789	168.455	-11.7632		2.34			0.000625738	0.000602647	0.000580409	0.000620746	0.000597839	0.000575778	0.000554531	0.000534067	0.000514359	0.000549612	0.00052933	0.000509797	0.000490984	0.000472866
	Average height of the first floor	0.9	meter			2.36	4060.68	#REF!	7.74316	7.5	0	0	1.68348	6.73393	0.0336697	0.0841742		0.0667923	36.8754	9.17608	-36.8086		0.281188	25.3161	33.4324	-25.0349		3.52507	14.7958	166.956	-11.2708		2.36			0.000938498	0.000903866	0.000870511	0.000931651	0.000897271	0.00086416	0.000832271	0.000801559	0.000771979	0.000825631	0.000795164	0.000765821	0.00073756	0.000710343
	Coastal length 12ft	8045				2.38	4136.7	#REF!	7.80878	7.5	0	0	1.68348	8.41742	0.0420871	0.126261		0.10862	38.7677	9.13425	-38.6591		0.447592	26.7876	33.266	-26.34		5.38075	15.8517	165.1	-10.4709		2.38			0.00126619	0.00121946	0.00117446	0.00125758	0.00121117	0.00116648	0.00112343	0.00108198	0.00104205	0.00111524	0.00107408	0.00103445	0.000996275	0.00095951
	OUTPUTS	2030	2080	2130		2.4	4213.09	#REF!	7.8744	7.5	0	0	1.68348	10.1009	0.0505045	0.176766		0.161448	40.7271	9.08142	-40.5656		0.654431	28.3175	33.0592	-27.6631		7.52824	16.9576	162.953	-9.42931		2.4			0.00159386	0.00153505	0.0014784	0.00158357	0.00152514	0.00146885	0.00141465	0.00136245	0.00131217	0.00140504	0.00135319	0.00130325	0.00125516	0.00120884
	Optimal Level of Flood Defense	No_Wall	No_Wall	3.02		2.42	4289.78	#REF!	7.94002	7.5	0	0	1.68348	11.7844	0.0589219	0.235688		0.224929	42.7542	9.01794	-42.5293		0.900673	29.9068	32.8129	-29.0061		9.90017	18.1146	160.581	-8.21441		2.42			0.0019104	0.0018399	0.00177201	0.00189846	0.0018284	0.00176093	0.00169595	0.00163336	0.00157309	0.001685	0.00162282	0.00156293	0.00150526	0.00144971
						2.44	4366.72	#REF!	8.00564	8	0	0	3.14368	14.9281	0.0746403	0.310328		0.3002	44.8498	8.94267	-44.5496		1.1916	31.5561	32.522	-30.3645		12.4939	19.3237	157.987	-6.82985		2.44			0.00226103	0.00217759	0.00209724	0.00224709	0.00216417	0.0020843	0.00200739	0.00193331	0.00186197	0.00199484	0.00192123	0.00185033	0.00178205	0.00171629
	Average height of Walls	#VALUE!	#VALUE!	1.444		2.46	4443.83	#REF!	8.07126	8	0	0	3.14368	18.0717	0.0903587	0.400687		0.387671	47.0145	8.8552	-46.6268		1.52986	33.2664	32.1838	-31.7365		15.2835	20.5859	155.198	-5.30241		2.46			0.00262419	0.00252735	0.00243409	0.00260796	0.00251173	0.00241904	0.00232977	0.0022438	0.002161	0.00231541	0.00222996	0.00214767	0.00206842	0.00199209
	Average Elevation of wall	1.1	1.316	1.576		2.48	4521.06	#REF!	8.13688	8	0	0	3.14368	21.2154	0.106077	0.506764		0.487194	49.2486	8.75568	-48.7614		1.91616	35.0382	31.7975	-33.1221		18.2329	21.9021	152.248	-3.66913		2.48			0.00298364	0.00287353	0.0027675	0.00296488	0.00285547	0.0027501	0.00264861	0.00255087	0.00245674	0.00263224	0.00253511	0.00244156	0.00235146	0.00226468
	Wall Length	No_Wall	No_Wall	6445.01		2.5	4598.33	#REF!	8.2025	8	0	0	3.14368	24.3591	0.121796	0.628559		0.598218	51.5527	8.64465	-50.9545		2.34958	36.8722	31.364	-34.5226		21.3039	23.273	149.177	-1.96907		2.5			0.00332749	0.0032047	0.00308644	0.00330596	0.00318397	0.00306647	0.00295332	0.00284433	0.00273937	0.00293475	0.00282645	0.00272215	0.0026217	0.00252495
	Cost of Wall	No_Wall	No_Wall	79.6647		2.52	4675.57	#REF!	8.26812	8	0	0	3.14368	27.5028	0.137514	0.766073		0.719899	53.9271	8.52297	-53.2072		2.82797	38.7689	30.8857	-35.9409		24.461	24.6994	146.02	-0.23838		2.52			0.00364735	0.00351276	0.00338313	0.00362286	0.00348917	0.00336041	0.00323641	0.00311698	0.00300196	0.00321548	0.00309682	0.00298254	0.00287248	0.00276648
	Expected Benefit	No_Wall	No_Wall	110.158		2.54	4752.72	#REF!	8.33374	8	0	0	3.14368	30.6465	0.153232	0.919306		0.851204	56.372	8.39167	-55.5208		3.34791	40.7288	30.3657	-37.3809		27.6746	26.1821	142.806	1.49252		2.54			0.00393765	0.00379234	0.0036524	0.00391002	0.00376573	0.00362677	0.00349293	0.00336404	0.0032399	0.00346948	0.00334145	0.00321815	0.00309939	0.00298502
	Net Benefit	#VALUE!	#VALUE!	30.4932		2.56	4829.71	#REF!	8.39936	8	0	0	3.14368	33.7902	0.168951	1.08826		0.990986	58.8875	8.25189	-57.8965		3.90526	42.7522	29.8084	-38.8469		30.9218	27.7217	139.559	3.20014		2.56			0.004195	0.00404019	0.0038911	0.00416409	0.00401042	0.00386243	0.0037199	0.00358263	0.00345042	0.0036938	0.00355749	0.00342621	0.00329978	0.00317801
	Residual Damage	9.24287	33.7136	60.3232		2.58	4906.48	#REF!	8.46498	8	0	0	3.14368	36.9338	0.184669	1.27293		1.13804	61.4737	8.10483	-60.3357		4.49525	44.8395	29.2184	-40.3442		34.187	29.3188	136.294	4.86826		2.58			0.00441772	0.0042547	0.00409769	0.00438344	0.00422168	0.00406589	0.00391585	0.00377135	0.00363218	0.003887	0.00374356	0.00360542	0.00347237	0.00334424
	Expected Damage	9.24287	33.7136	170.481		2.6	4982.96	#REF!	8.5306	8.5	0	0	5.69323	42.6271	0.213135	1.48606		1.29248	64.1307	7.95039	-62.8382		5.11783	46.9909	28.5958	-41.873		37.49	30.9739	132.991	6.51612		2.6			0.00464531	0.00447389	0.00430879	0.00460727	0.00443725	0.00427351	0.00411581	0.00396393	0.00381765	0.00408387	0.00393316	0.00378802	0.00364824	0.00351361
						2.62	5059.09	#REF!	8.59622	8.5	0	0	5.69323	48.3203	0.241601	1.72766		1.45405	66.8583	7.78882	-65.4042		5.77135	49.2066	27.9423	-43.4352		40.8441	32.6875	129.637	8.15664		2.62			0.00486653	0.00468694	0.00451399	0.00482445	0.00464642	0.00447496	0.00430983	0.00415079	0.00399761	0.00427454	0.0041168	0.00396488	0.00381857	0.00367766
	Surge height (ft)	Area submerged (sq m)	Area (sq m)	Buildings		2.64	5134.8	#REF!	8.66184	8.5	0	0	5.69323	54.0135	0.270068	1.99773		1.62223	69.6565	7.62065	-68.0342		6.45289	51.4868	27.2607	-45.0339		44.2567	34.46	126.224	9.79667		2.64			0.00507331	0.0048861	0.00470579	0.005027	0.00484149	0.00466283	0.00449077	0.00432505	0.00416545	0.00445194	0.00428765	0.00412943	0.00397705	0.00383029
Heght(m)	3	6528	0	0	Building Values (million $)	2.66	5210.06	#REF!	8.72746	8.5	0	0	5.69323	59.7067	0.298534	2.29626		1.7963	72.525	7.44658	-70.7287		7.15879	53.8316	26.5548	-46.6728		47.7304	36.2919	122.751	11.4385		2.66			0.00526007	0.00506597	0.00487902	0.0052094	0.00501717	0.00483202	0.00465371	0.00448198	0.00431659	0.00461123	0.00444107	0.00427718	0.00411935	0.00396734
0.9144	3.5	9156	2628		0	2.68	5284.79	#REF!	8.79308	8.5	0	0	5.69323	65.4	0.327	2.62326		1.97544	75.4637	7.26743	-73.4883		7.88496	56.241	25.8287	-48.356		51.2642	38.1834	119.217	13.0808		2.68			0.0054232	0.00522308	0.00503034	0.00536814	0.00517004	0.00497926	0.00479551	0.00461855	0.00444812	0.00474932	0.00457406	0.00440527	0.00424271	0.00408614
1.0668	4	11101.6	1945.6		0	2.7	5358.97	#REF!	8.8587	8.5	0	0	5.69323	71.0932	0.355466	2.97873		2.15877	78.4724	7.0841	-76.3137		8.6271	58.715	25.0865	-50.0879		54.8537	40.1349	115.627	14.7188		2.7			0.00556064	0.00535544	0.00515781	0.00550119	0.00529819	0.00510267	0.00491437	0.00473303	0.00455837	0.00486447	0.00468496	0.00451208	0.00434558	0.00418522
1.2192	4.5	13759.8	2658.2		0	2.72	5432.53	#REF!	8.92432	8.5	0	0	5.69323	76.7864	0.383932	3.36266		2.34539	81.5508	6.89749	-79.2054		9.38089	61.2537	24.3327	-51.8728		58.4928	42.1466	111.988	16.3462		2.72			0.00567148	0.00546219	0.00526063	0.00560774	0.00540081	0.00520151	0.00500956	0.0048247	0.00464666	0.00495601	0.00477312	0.00459698	0.00442735	0.00426397
1.3716	5	18960.6	5200.8		0	2.74	5505.45	#REF!	8.98994	8.5	0	0	5.69323	82.4797	0.412398	3.77506		2.53439	84.6986	6.70849	-82.1642		10.1421	63.857	23.5715	-53.7149		62.1728	44.2188	108.308	17.954		2.74			0.00575575	0.00554336	0.0053388	0.00568786	0.00547797	0.00527582	0.00508113	0.00489363	0.00471304	0.00502403	0.00483863	0.00466008	0.00448811	0.00432249
1.524	5.5	19615.2	654.6		0	2.76	5577.68	#REF!	9.05556	9	0	0	4.43834	86.918	0.43459	4.20965		2.72462	87.9156	6.51825	-85.1909		10.9056	66.5249	22.808	-55.6193		65.886	46.3516	104.595	19.5343		2.76			0.00580547	0.00559124	0.00538491	0.00573371	0.00552213	0.00531835	0.00512209	0.00493308	0.00475104	0.00506167	0.00487489	0.004695	0.00452174	0.00435488
1.6764	6	27308.8	7693.6		0	2.78	5649.2	#REF!	9.12118	9	0	0	4.43834	91.3563	0.456782	4.66643		2.91506	91.2013	6.32782	-88.2863		11.6669	69.2572	22.0467	-57.5903		69.6074	48.5454	100.874	21.0621		2.78			0.00582426	0.00560934	0.00540234	0.00574894	0.0055368	0.00533248	0.0051357	0.00494618	0.00476366	0.00507222	0.00488504	0.00470478	0.00453116	0.00436395
1.8288	6.5	59399.8	32091		0	2.8	5719.97	#REF!	9.1868	9	0	0	4.43834	95.7947	0.478973	5.14541		3.1048	94.5557	6.13808	-91.4509		12.422	72.0539	21.2916	-59.6319		73.3213	50.8001	97.1598	22.5212		2.8			0.00581558	0.00560097	0.00539428	0.00573703	0.00552532	0.00532143	0.00512506	0.00493593	0.00475379	0.00505878	0.0048721	0.00469231	0.00451916	0.00435239
1.9812	7	86224.4	26824.6		0	2.82	5789.97	#REF!	9.25242	9	0	0	4.43834	100.233	0.501165	5.64657		3.29305	97.9782	5.94983	-94.6852		13.1675	74.9149	20.5461	-61.7474		77.0112	53.116	93.4699	23.8952		2.82			0.00578268	0.00556929	0.00536377	0.00570124	0.00549086	0.00528823	0.00509309	0.00490514	0.00472413	0.0050243	0.00483889	0.00466033	0.00448835	0.00432272
2.1336	7.5	117287	31062.2	31.467	0	2.84	5859.19	#REF!	9.31804	9	0	0	4.43834	104.671	0.523357	6.16993		3.47912	101.469	5.76375	-97.9896		13.9007	77.8402	19.813	-63.9395		80.661	55.4932	89.8201	25.1677		2.84			0.00572864	0.00551724	0.00531364	0.00564464	0.00543634	0.00523573	0.00504252	0.00485644	0.00467723	0.00497151	0.00478805	0.00461136	0.00444119	0.0042773
2.286	8	183578	66290.9	67.1548	11.7844	2.86	5927.61	#REF!	9.38366	9	0	0	4.43834	109.11	0.545548	6.71548		3.66244	105.027	5.58044	-101.365		14.619	80.8295	19.0946	-66.2105		84.2543	57.9319	86.2268	26.3224		2.86			0.00565627	0.00544754	0.00524652	0.00557006	0.00536451	0.00516655	0.0049759	0.00479228	0.00461543	0.00490294	0.00472201	0.00454776	0.00437994	0.00421831
2.4384	8.5	303631	120053	121.618	25.1495	2.88	5995.2	#REF!	9.44928	9	0	0	4.43834	113.548	0.56774	7.28322		3.84249	108.653	5.40038	-104.81		15.3206	83.8829	18.393	-68.5623		87.775	60.4321	82.7061	27.3429		2.88			0.00556819	0.00536272	0.00516482	0.0054801	0.00527787	0.00508311	0.00489553	0.00471488	0.00454089	0.00482091	0.00464301	0.00447168	0.00430666	0.00414774
2.5908	9	385523	81892.4	82.9596	45.5458	2.9	6061.97	#REF!	9.5149	9.5	0	0	9.82785	123.376	0.616879	7.90009		4.01947	112.345	5.2234	-108.326		16.0062	87.0002	17.7075	-70.9941		91.2209	62.9939	79.2602	28.2271		2.9			0.0054855	0.00528307	0.00508812	0.00539554	0.00519643	0.00500468	0.00481999	0.00464213	0.00447082	0.00474374	0.00456868	0.00440009	0.00423772	0.00408134
2.7432	9.5	592763	207240	209.941	31.0684	2.92	6127.91	#REF!	9.58052	9.5	0	0	9.82785	133.204	0.666019	8.56611		4.19346	116.105	5.04941	-111.912		16.6762	90.1814	17.0375	-73.5053		94.5893	65.6174	75.8918	28.9719		2.92			0.00540524	0.00520577	0.00501367	0.00531348	0.0051174	0.00492856	0.00474669	0.00457153	0.00440283	0.00466885	0.00449656	0.00433063	0.00417082	0.00401691
2.8956	10	753805	161042	163.14	78.6228	2.94	6193.01	#REF!	9.64614	9.5	0	0	9.82785	143.032	0.715158	9.28127		4.3645	119.932	4.87837	-115.567		17.3307	93.4264	16.3829	-76.0957		97.8768	68.3028	72.6043	29.574		2.94			0.00532524	0.00512873	0.00493947	0.00523179	0.00503872	0.00485278	0.00467371	0.00450124	0.00433514	0.00459437	0.00442483	0.00426154	0.00410429	0.00395283
3.048	10.5	973057	219252	222.109	61.096	2.96	6257.27	#REF!	9.71176	9.5	0	0	9.82785	152.859	0.764297	10.0456		4.53255	123.824	4.71032	-119.292		17.9698	96.7351	15.7438	-78.7653		101.08	71.0501	69.4008	30.0302		2.96			0.00524396	0.00505045	0.00486408	0.00514894	0.00495893	0.00477594	0.0045997	0.00442996	0.00426649	0.00451898	0.00435222	0.00419161	0.00403694	0.00388796
3.2004	11	1.10929e+06	136236	138.011	83.18	2.98	6320.68	#REF!	9.77738	9.5	0	0	9.82785	162.687	0.813436	10.859		4.69755	127.784	4.54533	-123.086		18.5934	100.108	15.1202	-81.5141		104.197	73.8595	66.2843	30.3372		2.98			0.00516035	0.00496992	0.00478652	0.00506391	0.00487705	0.00469707	0.00452374	0.00435681	0.00419603	0.00444177	0.00427786	0.00412	0.00396797	0.00382154
3.3528	11.5	1208939	99646.3	100.945	51.6851	3	6383.26	#REF!	9.843	9.5	0	0	9.82785	172.515	0.862576	11.7216		4.85942	131.809	4.38346	-126.95		19.2013	103.544	14.5124	-84.3423		107.223	76.731	63.2577	30.4924		3			0.00507375	0.00488652	0.00470619	0.00497607	0.00479245	0.0046156	0.00444527	0.00428123	0.00412325	0.0043622	0.00420123	0.00404619	0.00389688	0.00375308
3.5052	12	1349823	140884	142.72	37.8038	3.02	6445.01	#REF!	9.90862	9.5	0	0	9.82785	182.343	0.911715	12.6333		5.01807	135.901	4.22481	-130.883		19.7932	107.043	13.9204	-87.2499		110.158	79.6647	60.3232	30.4932		3.02			0.0049838	0.00479989	0.00462277	0.00488507	0.0047048	0.00453119	0.00436398	0.00420294	0.00404784	0.00427997	0.00412203	0.00396992	0.00382342	0.00368233
3.6576	12.5	1.38151e+06	31682.8	32.0957	53.4486	3.04	6505.93	#REF!	9.97424	9.5	0	0	9.82785	192.171	0.960854	13.5941		5.1734	140.058	4.06947	-134.885		20.3691	110.606	13.3445	-90.2372		112.999	82.6608	57.4825	30.3378		3.04			0.0048904	0.00470993	0.00453613	0.0047908	0.00461401	0.00444374	0.00427976	0.00412183	0.00396973	0.00419498	0.00404017	0.00389108	0.00374749	0.00360921
3.81	13	1.48056e+06	99055.9	100.347	12.0198	3.06	6566.03	#REF!	10.0399	10	0	0	7.637	199.808	0.999039	14.5932		5.32521	144.282	3.91766	-138.956		20.9282	114.233	12.7854	-93.3047		115.742	85.7193	54.7391	30.0227		3.06			0.00478999	0.00461323	0.00444299	0.0046898	0.00451673	0.00435006	0.00418953	0.00403493	0.00388603	0.00410421	0.00395275	0.00380689	0.00366641	0.00353111
3.9624	13.5	1.57055e+06	89987.9	91.1606	37.5799	3.08	6625.31	#REF!	10.1055	10	0	0	7.637	207.445	1.03722	15.6304		5.47333	148.571	3.76954	-143.097		21.4703	117.923	12.2433	-96.4529		118.386	88.8403	52.0952	29.5455		3.08			0.0046837	0.00451086	0.0043444	0.00458317	0.00441405	0.00425116	0.00409428	0.0039432	0.00379768	0.00400864	0.00386072	0.00371825	0.00358104	0.00344889
4.1148	14	1.65096e+06	80408.9	81.4567	34.1396	3.1	6683.79	#REF!	10.1711	10	0	0	7.637	215.082	1.07541	16.7058		5.61763	152.925	3.62524	-147.308		21.995	121.677	11.7186	-99.6821		120.929	92.024	49.552	28.9051		3.1			0.00457258	0.00440384	0.00424133	0.00447196	0.00430694	0.004148	0.00399494	0.00384751	0.00370553	0.00390919	0.00376493	0.003626	0.00349219	0.00336333
4.2672	14.5	1.79985e+06	148890	150.83	30.5055	3.12	6741.48	#REF!	10.2367	10	0	0	7.637	222.719	1.11359	17.8194		5.758	157.345	3.48487	-151.587		22.5021	125.494	11.2115	-102.992		123.371	95.2705	47.1099	28.1007		3.12			0.00445759	0.0042931	0.00413467	0.00435711	0.00419633	0.00404147	0.00389233	0.0037487	0.00361037	0.00380669	0.00366621	0.00353092	0.00340062	0.00327513
4.4196	15	1.88193e+06	82083.5	83.1532	56.4858	3.14	6798.39	#REF!	10.3023	10	0	0	7.637	230.356	1.15178	18.9712		5.89437	161.831	3.3485	-155.937		22.9916	129.375	10.722	-106.384		125.713	98.5798	44.7686	27.1328		3.14			0.00433961	0.00417947	0.00402524	0.00423948	0.00408304	0.00393237	0.00378725	0.0036475	0.0035129	0.00370189	0.00356528	0.00343371	0.003307	0.00318497
4.572	15.5	1.99604e+06	114111	115.598	31.1409	3.16	6854.53	#REF!	10.368	10	0	0	7.637	237.993	1.18996	20.1612		6.02669	166.383	3.21619	-160.356		23.4635	133.32	10.2501	-109.857		127.954	101.952	42.527	26.002		3.16			0.00421944	0.00406373	0.00391377	0.00411986	0.00396783	0.00382141	0.0036804	0.00354458	0.00341378	0.00359548	0.0034628	0.00333502	0.00321195	0.00309342
4.7244	16	2.13053e+06	134485	136.238	43.2915	3.18	6909.91	#REF!	10.4336	10	0	0	7.637	245.63	1.22815	21.3893		6.15492	171	3.08795	-164.845		23.918	137.328	9.79566	-113.41		130.097	105.388	40.3836	24.71		3.18			0.0040978	0.00394658	0.00380094	0.00399896	0.00385139	0.00370927	0.00357239	0.00344056	0.0033136	0.00348809	0.00335937	0.0032354	0.00311601	0.00300102
4.8768	16.5	2.26411e+06	133586	135.327	51.0211	3.2	6964.54	#REF!	10.4992	10	0	0	7.637	253.267	1.26633	22.6556		6.27907	175.682	2.9638	-169.403		24.3552	141.4	9.35846	-117.045		132.144	108.886	38.3366	23.2583		3.2			0.00397534	0.00382864	0.00368736	0.00387741	0.00373433	0.00359652	0.0034638	0.00333598	0.00321288	0.00338026	0.00325552	0.00313539	0.00301968	0.00290825
5.0292	17	2.39024e+06	126127	127.77	50.6798	3.22	7018.44	#REF!	10.5648	10.5	0	0	11.8829	265.15	1.32575	23.9814		6.39925	180.43	2.84362	-174.031		24.7757	145.536	8.93789	-120.76		134.099	112.448	36.382	21.6509		3.22			0.00385606	0.00371377	0.00357672	0.0037591	0.00362038	0.00348679	0.00335812	0.0032342	0.00311485	0.00327539	0.00315452	0.00303811	0.002926	0.00281803
5.1816	17.5	2.4792e+06	88959.7	90.119	47.85	3.24	7071.63	#REF!	10.6304	10.5	0	0	11.8829	277.033	1.38516	25.3666		6.51557	185.243	2.7273	-178.728		25.1803	149.736	8.53336	-124.555		135.965	116.074	34.5159	19.8914		3.24			0.00373963	0.00360163	0.00346872	0.0036437	0.00350924	0.00337975	0.00325503	0.00313491	0.00301923	0.00317318	0.00305608	0.00294331	0.00283469	0.00273009
5.334	18	2.54534e+06	66140.3	67.0022	33.7496	3.26	7124.1	#REF!	10.6961	10.5	0	0	11.8829	288.915	1.44458	26.8111		6.62812	190.123	2.61475	-183.494		25.5693	153.999	8.14435	-128.43		137.746	119.763	32.7349	17.9833		3.26			0.00362578	0.00349198	0.00336312	0.00353096	0.00340067	0.00327517	0.00315431	0.00303791	0.00292581	0.0030734	0.00295999	0.00285076	0.00274556	0.00264425
5.4864					25.0923	3.28	7175.89	#REF!	10.7617	10.5	0	0	11.8829	300.798	1.50399	28.3151		6.737	195.067	2.50587	-188.33		25.9433	158.327	7.77033	-132.384		139.446	123.516	31.0354	15.9298		3.28			0.00351435	0.00338466	0.00325976	0.00342071	0.00329448	0.00317291	0.00305582	0.00294305	0.00283445	0.00297591	0.00286609	0.00276033	0.00265847	0.00256037
						3.3	7226.99	#REF!	10.8273	10.5	0	0	11.8829	312.681	1.56341	29.8785		6.8423	200.078	2.40057	-193.236		26.3028	162.718	7.41084	-136.416		141.067	127.333	29.4143	13.734		3.3			0.00340521	0.00327955	0.00315853	0.00331281	0.00319056	0.00307283	0.00295943	0.00285023	0.00274505	0.00288058	0.00277428	0.00267191	0.00257331	0.00247835
					932.94	3.32	7277.43	#REF!	10.8929	10.5	0	0	11.8829	324.564	1.62282	31.5013		6.94409	205.154	2.29878	-198.21		26.6482	167.174	7.06538	-140.526		142.613	131.214	27.8683	11.3991		3.32			0.00329829	0.00317657	0.00305935	0.0032072	0.00308884	0.00297486	0.00286508	0.00275935	0.00265753	0.00278734	0.00268448	0.00258542	0.00249001	0.00239813
						3.34	7327.22	#REF!	10.9585	10.5	0	0	11.8829	336.447	1.68223	33.1836		7.04246	210.296	2.20041	-203.254		26.9801	171.694	6.73353	-144.714		144.087	135.159	26.3945	8.9278		3.34			0.00319353	0.00307568	0.00296218	0.0031038	0.00298927	0.00287896	0.00277272	0.0026704	0.00257186	0.00269614	0.00259665	0.00250083	0.00240854	0.00231966
						3.36	7376.37	#REF!	11.0242	11	0	0	6.46064	342.907	1.71454	34.8981		7.13743	215.504	2.10545	-208.367		27.2985	176.279	6.41509	-148.98		145.49	139.168	24.9909	6.32192		3.36			0.00308851	0.00297454	0.00286477	0.00300027	0.00288956	0.00278293	0.00268023	0.00258133	0.00248607	0.00260493	0.0025088	0.00241622	0.00232706	0.00224119
12 foot wall	Cost	761.202				3.38	7424.89	#REF!	11.0898	11	0	0	6.46064	349.368	1.74684	36.645		7.229	220.778	2.01388	-213.549		27.6038	180.928	6.1098	-153.324		146.826	143.242	23.6555	3.58336		3.38			0.00298381	0.0028737	0.00276765	0.00289716	0.00279025	0.00268729	0.00258812	0.00249261	0.00240063	0.00251418	0.0024214	0.00233205	0.00224599	0.00216311
4.76	Cost	773.49				3.4	7472.8	#REF!	11.1554	11	0	0	6.46064	355.829	1.77914	38.4241		7.31722	226.118	1.92566	-218.801		27.8962	185.641	5.8174	-157.745		148.095	147.381	22.386	0.714196		3.4			0.00287989	0.00277362	0.00267127	0.00279494	0.0026918	0.00259246	0.0024968	0.00240466	0.00231592	0.0024243	0.00233484	0.00224868	0.00216569	0.00208578
4.976	Cost	796.426				3.42	7520.11	#REF!	11.221	11	0	0	6.46064	362.289	1.81145	40.2355		7.40214	231.524	1.84074	-224.122		28.1761	190.42	5.53755	-162.244		149.301	151.584	21.1802	-2.28337		3.42			0.00277718	0.0026747	0.002576	0.00269398	0.00259457	0.00249882	0.00240661	0.0023178	0.00223227	0.00233561	0.00224943	0.00216642	0.00208647	0.00200948
5.236						3.44	7566.83	#REF!	11.2866	11	0	0	6.46064	368.75	1.84375	42.0793		7.48382	236.996	1.75906	-229.513		28.4437	195.263	5.2699	-166.819		150.446	155.853	20.0355	-5.40708		3.44			0.00267601	0.00257726	0.00248215	0.00259462	0.00249888	0.00240666	0.00231785	0.00223232	0.00214994	0.00224841	0.00216544	0.00208553	0.00200857	0.00193445
						3.46	7612.98	#REF!	11.3523	11	0	0	6.46064	375.211	1.87605	43.9553		7.56232	242.535	1.68055	-234.973		28.6995	200.171	5.0141	-171.471		151.531	160.186	18.9496	-8.65463		3.46			0.00257665	0.00248157	0.00238999	0.00249714	0.00240499	0.00231624	0.00223076	0.00214844	0.00206916	0.00216292	0.00208311	0.00200624	0.0019322	0.0018609
						3.48	7658.57	#REF!	11.4179	11	0	0	6.46064	381.671	1.90836	45.8637		7.63774	248.14	1.60514	-240.503		28.9439	205.144	4.76975	-176.2		152.561	164.585	17.92	-12.0237		3.48			0.00247934	0.00238785	0.00229973	0.00240173	0.0023131	0.00222775	0.00214554	0.00206636	0.00199011	0.00207933	0.0020026	0.0019287	0.00185752	0.00178898
						3.5	7703.61	#REF!	11.4835	11	0	0	6.46064	388.132	1.94066	47.8044		7.71013	253.812	1.53274	-246.102		29.1771	210.182	4.53647	-181.005		153.537	169.049	16.9442	-15.512		3.5			0.00238427	0.00229628	0.00221155	0.00230859	0.0022234	0.00214135	0.00206233	0.00198623	0.00191293	0.00199777	0.00192405	0.00185305	0.00178467	0.00171881
						3.52	7748.11	#REF!	11.5491	11.5	0	0	5.40055	393.532	1.96766	49.772		7.77958	259.551	1.46329	-251.771		29.3997	215.286	4.31389	-185.886		154.461	173.579	16.0199	-19.1174		3.52			0.00229133	0.00220678	0.00212534	0.00221761	0.00213577	0.00205696	0.00198105	0.00190795	0.00183754	0.00191817	0.00184739	0.00177922	0.00171356	0.00165033
						3.54	7792.08	#REF!	11.6147	11.5	0	0	5.40055	398.933	1.99466	51.7667		7.84618	265.356	1.3967	-257.51		29.612	220.454	4.10163	-190.842		155.336	178.174	15.1447	-22.8377		3.54			0.0022007	0.00211949	0.00204127	0.00212894	0.00205038	0.00197472	0.00190185	0.00183167	0.00176407	0.00184066	0.00177273	0.00170732	0.00164431	0.00158363
						3.56	7835.54	#REF!	11.6804	11.5	0	0	5.40055	404.334	2.02167	53.7884		7.90999	271.228	1.33288	-263.318		29.8143	225.689	3.8993	-195.875		156.165	182.835	14.3165	-26.6708		3.56			0.00211249	0.00203454	0.00195946	0.00204272	0.00196734	0.00189474	0.00182482	0.00175748	0.00169263	0.00176533	0.00170018	0.00163744	0.00157702	0.00151882
						3.58	7878.49	#REF!	11.746	11.5	0	0	5.40055	409.734	2.04867	55.837		7.97112	277.168	1.27175	-269.196		30.0071	230.989	3.70651	-200.982		156.948	187.563	13.5329	-30.6145		3.58			0.00202682	0.00195203	0.00187999	0.00195903	0.00188674	0.00181711	0.00175006	0.00168548	0.00162328	0.00169226	0.00162981	0.00156967	0.00151174	0.00145596
						3.6	7920.95	#REF!	11.8116	11.5	0	0	5.40055	415.135	2.07567	57.9127		8.02965	283.174	1.21322	-275.144		30.1907	236.355	3.5229	-206.165		157.689	192.356	12.7918	-34.667		3.6			0.00194374	0.00187202	0.00180294	0.00187793	0.00180863	0.00174188	0.00167761	0.0016157	0.00155608	0.00162149	0.00156166	0.00150403	0.00144853	0.00139508
						3.62	7962.93	#REF!	11.8772	11.5	0	0	5.40055	420.535	2.10268	60.0154		8.08566	289.248	1.15721	-281.162		30.3655	241.787	3.34807	-211.422		158.39	197.216	12.0911	-38.8262		3.62			0.00186331	0.00179455	0.00172833	0.00179945	0.00173305	0.00166909	0.0016075	0.00154818	0.00149105	0.00155307	0.00149576	0.00144056	0.0013874	0.0013362
						3.64	8004.43	#REF!	11.9428	11.5	0	0	5.40055	425.936	2.12968	62.1451		8.13926	295.389	1.10362	-287.249		30.532	247.286	3.18167	-216.754		159.052	202.143	11.4287	-43.0903		3.64			0.00178553	0.00171964	0.00165619	0.00172361	0.00166001	0.00159875	0.00153976	0.00148294	0.00142821	0.00148698	0.00143211	0.00137926	0.00132837	0.00127935
						3.66	8045.47	#REF!	12.0085	12	0	0	6.68108	432.617	2.16308	64.3081		8.19052	301.597	1.05236	-293.407		30.6903	252.85	3.0233	-222.16		159.679	207.136	10.8026	-47.4573		3.66			0.0017106	0.00164747	0.00158668	0.00165059	0.00158968	0.00153102	0.00147452	0.00142011	0.0013677	0.00142339	0.00137086	0.00132027	0.00127155	0.00122463
						3.68	8086.06	#REF!	12.0741	12	0	0	6.68108	439.298	2.19649	66.5046		8.23954	307.874	1.00333	-299.634		30.841	258.481	2.87261	-227.64		160.27	212.196	10.2108	-51.9256		3.68			0.00163845	0.00157798	0.00151975	0.00158032	0.001522	0.00146584	0.00141175	0.00135965	0.00130948	0.00136222	0.00131195	0.00126354	0.00121691	0.00117201
						3.7	8126.21	#REF!	12.1397	12	0	0	6.68108	445.979	2.22989	68.7345		8.28641	314.218	0.956461	-305.931		30.9844	264.178	2.72924	-233.194		160.83	217.323	9.65158	-56.4933		3.7			0.00156903	0.00151113	0.00145537	0.00151275	0.00145693	0.00140316	0.00135138	0.00130151	0.00125349	0.00130344	0.00125534	0.00120902	0.0011644	0.00112143
						3.72	8165.93	#REF!	12.2053	12	0	0	6.68108	452.66	2.2633	70.9978		8.33122	320.63	0.911651	-312.299		31.1208	269.942	2.59284	-238.821		161.358	222.517	9.12305	-61.159		3.72			0.00150228	0.00144685	0.00139346	0.00144781	0.00139439	0.00134293	0.00129337	0.00124565	0.00119968	0.00124698	0.00120097	0.00115665	0.00111397	0.00107286
						3.74	8205.22	#REF!	12.2709	12	0	0	6.68108	459.341	2.29671	73.2945		8.37405	327.11	0.868818	-318.736		31.2505	275.773	2.4631	-244.522		161.858	227.778	8.62359	-65.921		3.74			0.00143815	0.00138508	0.00133396	0.00138545	0.00133432	0.00128508	0.00123766	0.00119199	0.001148	0.00119279	0.00114877	0.00110638	0.00106555	0.00102623
						3.76	8244.09	#REF!	12.3366	12	0	0	6.68108	466.022	2.33011	75.6246		8.41499	333.658	0.827881	-325.243		31.3739	281.67	2.33969	-250.296		162.33	233.107	8.15158	-70.778		3.76			0.00137654	0.00132575	0.00127683	0.00132558	0.00127666	0.00122955	0.00118418	0.00114048	0.0010984	0.00114079	0.00109869	0.00105815	0.0010191	0.000981493
						3.78	8282.56	#REF!	12.4022	12	0	0	6.68108	472.703	2.36352	77.9882		8.45411	340.275	0.78876	-331.821		31.4913	287.635	2.22232	-256.144		162.776	238.504	7.70553	-75.7285		3.78			0.00131741	0.0012688	0.00122197	0.00126814	0.00122134	0.00117627	0.00113287	0.00109106	0.0010508	0.00109092	0.00105067	0.0010119	0.000974555	0.000938592
						3.8	8320.63	#REF!	12.4678	12	0	0	6.68108	479.384	2.39692	80.3851		8.49149	346.96	0.751379	-338.469		31.6029	293.667	2.1107	-262.064		163.197	243.969	7.28399	-80.7714		3.8			0.00126067	0.00121415	0.00116935	0.00121305	0.00116829	0.00112518	0.00108366	0.00104367	0.00100515	0.00104313	0.00100463	0.000967561	0.000931856	0.000897469
						3.82	8358.31	#REF!	12.5334	12.5	0	0	1.50248	480.887	2.40443	82.7895		8.5272	353.714	0.715674	-345.187		31.7091	299.766	2.00457	-268.057		163.595	249.501	6.88574	-85.9056		3.82			0.00120587	0.00116137	0.00111852	0.00115988	0.00111708	0.00107586	0.00103616	0.000997919	0.000961094	0.000997017	0.000960225	0.000924791	0.000890665	0.000857798
						3.84	8395.6	#REF!	12.599	12.5	0	0	1.50248	482.389	2.41195	85.2015		8.56129	360.536	0.681583	-351.975		31.8099	305.933	1.9037	-274.123		163.972	255.101	6.50957	-91.13		3.84			0.00115302	0.00111047	0.0010695	0.00110863	0.00106772	0.00102831	0.000990368	0.000953821	0.000918623	0.000952594	0.000917442	0.000883587	0.000850981	0.000819578
						3.86	8432.53	#REF!	12.6647	12.5	0	0	1.50248	483.892	2.41946	87.6209		8.59383	367.428	0.649043	-358.834		31.9058	312.168	1.80786	-280.262		164.327	260.77	6.15434	-96.4435		3.86			0.00110211	0.00106144	0.00102227	0.00105928	0.00102019	0.000982543	0.000946285	0.000911365	0.000877734	0.000909848	0.000876273	0.000843937	0.000812794	0.0007828
						3.88	8469.08	#REF!	12.7303	12.5	0	0	1.50248	485.394	2.42697	90.0479		8.62488	374.388	0.617992	-365.763		31.9968	318.47	1.71682	-286.473		164.662	266.508	5.81893	-101.845		3.88			0.00105313	0.00101427	0.000976838	0.00101182	0.000974483	0.000938523	0.00090389	0.000870535	0.00083841	0.000868759	0.0008367	0.000805824	0.000776088	0.000747449
						3.9	8505.28	#REF!	12.7959	12.5	0	0	1.50248	486.897	2.43448	92.4824		8.6545	381.418	0.588371	-372.763		32.0833	324.84	1.63036	-292.757		164.979	272.313	5.5023	-107.335		3.9			0.00100604	0.000968917	0.000933162	0.000966225	0.00093057	0.00089623	0.000863158	0.000831305	0.000800629	0.000829302	0.000798699	0.000769225	0.000740839	0.000713501
						3.92	8541.13	#REF!	12.8615	12.5	0	0	1.50248	488.399	2.442	94.9244		8.68275	388.516	0.56012	-379.834		32.1654	331.278	1.54826	-299.113		165.278	278.188	5.20343	-112.91		3.92			0.000960819	0.000925363	0.000891216	0.000922457	0.000888417	0.000855632	0.000824058	0.000793649	0.000764362	0.000791444	0.000762239	0.000734111	0.00070702	0.00068093
						3.94	8576.63	#REF!	12.9271	12.5	0	0	1.50248	489.902	2.44951	97.3739		8.70969	395.685	0.533181	-386.975		32.2433	337.785	1.47031	-305.542		165.56	284.132	4.92135	-118.572		3.94			0.000917425	0.00088357	0.000850964	0.000880477	0.000847986	0.000816694	0.000786556	0.000757531	0.000729576	0.000755152	0.000727285	0.000700447	0.000674599	0.000649705
						3.96	8611.79	#REF!	12.9928	12.5	0	0	1.50248	491.404	2.45702	99.8309		8.73537	402.922	0.507498	-394.187		32.3173	344.36	1.39632	-312.042		165.826	290.144	4.65513	-124.318		3.96			0.000875814	0.000843495	0.000812368	0.000840242	0.000809236	0.000779373	0.000750613	0.000722914	0.000696237	0.000720384	0.0006938	0.000668198	0.00064354	0.000619792
						3.98	8646.62	#REF!	13.0584	13	0	0	5.36855	496.773	2.48386	102.315		8.75986	410.23	0.483012	-401.47		32.3875	351.003	1.32608	-318.615		166.077	296.226	4.40386	-130.149		3.98			0.000836099	0.000805245	0.00077553	0.000801857	0.000772267	0.000743768	0.000716322	0.000689888	0.00066443	0.000687228	0.000661868	0.000637444	0.000613921	0.000591266
						4	8681.12	#REF!	13.124	13	0	0	5.36855	502.141	2.51071	104.825		8.78321	417.607	0.459667	-408.824		32.4542	357.715	1.25939	-325.261		166.314	302.377	4.16666	-136.063		4			0.000798198	0.000768743	0.000740375	0.00076524	0.000737001	0.000709805	0.000683611	0.000658385	0.000634089	0.000655614	0.000631421	0.00060812	0.000585679	0.000564067
						4.02	8715.31	#REF!	13.1896	13	0	0	5.36855	507.51	2.53755	107.363		8.80546	425.054	0.437409	-416.249		32.5176	364.495	1.19607	-331.978		166.538	308.598	3.94271	-142.06		4.02			0.000762033	0.000733913	0.00070683	0.000730315	0.000703365	0.000677409	0.000652412	0.000628336	0.00060515	0.000625473	0.000602392	0.000580163	0.000558754	0.000538135
						4.04	8749.18	#REF!	13.2552	13	0	0	5.36855	512.878	2.56439	109.927		8.82669	432.572	0.416185	-423.745		32.5777	371.345	1.13594	-338.767		166.75	314.889	3.73124	-148.139		4.04			0.000727527	0.00070068	0.000674824	0.000697006	0.000671285	0.000646514	0.000622656	0.000599679	0.00057755	0.000596739	0.000574718	0.00055351	0.000533085	0.000513413
						4.06	8782.75	#REF!	13.3209	13	0	0	5.36855	518.247	2.59123	112.519		8.84692	440.159	0.395948	-431.312		32.6348	378.264	1.07884	-345.629		166.95	321.249	3.53152	-154.299		4.06			0.000694608	0.000668976	0.000644289	0.000665242	0.000640693	0.00061705	0.00059428	0.00057235	0.000551229	0.000569349	0.000548339	0.000528104	0.000508616	0.000489847
						4.08	8816.01	#REF!	13.3865	13	0	0	5.36855	523.615	2.61808	115.137		8.86622	447.817	0.376649	-438.951		32.689	385.252	1.02462	-352.563		167.138	327.679	3.34288	-160.541		4.08			0.000663205	0.000638731	0.000615161	0.000634952	0.000611521	0.000588955	0.000567221	0.00054629	0.000526131	0.00054324	0.000523194	0.000503887	0.000485292	0.000467384
						4.1	8848.98	#REF!	13.4521	13	0	0	5.36855	528.984	2.64492	117.782		8.88463	455.546	0.358245	-446.661		32.7405	392.309	0.97311	-359.568		167.316	334.18	3.16466	-166.863		4.1			0.000633249	0.000609881	0.000587375	0.00060607	0.000583705	0.000562165	0.00054142	0.000521441	0.000502199	0.000518356	0.000499227	0.000480805	0.000463062	0.000445974
						4.12	8881.67	#REF!	13.5177	13.5	0	0	4.26745	533.251	2.66626	120.448		8.90218	463.345	0.340694	-454.443		32.7894	399.435	0.924184	-366.646		167.485	340.751	2.99628	-173.266		4.12			0.000604648	0.000582336	0.000560846	0.000578506	0.000557158	0.000536598	0.000516796	0.000497725	0.000479358	0.000494615	0.000476363	0.000458785	0.000441854	0.000425549
						4.14	8914.06	#REF!	13.5833	13.5	0	0	4.26745	537.519	2.68759	123.135		8.91892	471.215	0.323956	-462.296		32.8359	406.632	0.877708	-373.796		167.644	347.392	2.83718	-179.748		4.14			0.000577345	0.00055604	0.000535521	0.000552203	0.000531825	0.0005122	0.000493299	0.000475095	0.000457563	0.000471971	0.000454554	0.00043778	0.000421625	0.000406066
						4.16	8946.18	#REF!	13.649	13.5	0	0	4.26745	541.786	2.70893	125.844		8.93488	479.155	0.307993	-470.221		32.8801	413.897	0.833556	-381.017		167.794	354.104	2.68682	-186.31		4.16			0.000551285	0.000530941	0.000511349	0.000527106	0.000507655	0.000488921	0.000470879	0.000453503	0.000436768	0.000450373	0.000433753	0.000417747	0.000402331	0.000387485
						4.18	8978.02	#REF!	13.7146	13.5	0	0	4.26745	546.054	2.73027	128.575		8.9501	487.167	0.292768	-478.217		32.922	421.233	0.791607	-388.311		167.936	360.887	2.5447	-192.95		4.18			0.000526413	0.000506987	0.000488279	0.000503164	0.000484596	0.000466713	0.000449491	0.000432904	0.000416929	0.000429777	0.000413917	0.000398643	0.000383932	0.000369764
						4.2	9009.6	#REF!	13.7802	13.5	0	0	4.26745	550.321	2.75161	131.326		8.96463	495.25	0.278246	-486.286		32.9619	428.639	0.75175	-395.677		168.071	367.74	2.41036	-199.67		4.2			0.000502678	0.000484129	0.000466263	0.000480324	0.000462599	0.000445529	0.000429088	0.000413254	0.000398004	0.000410137	0.000395002	0.000380425	0.000366387	0.000352867
						4.22	9040.91	#REF!	13.8458	13.5	0	0	4.26745	554.589	2.77294	134.099		8.97848	503.405	0.264395	-494.426		32.9997	436.115	0.713876	-403.115		168.198	374.665	2.28335	-206.467		4.22			0.000480031	0.000462317	0.000445256	0.000458539	0.000441618	0.000425322	0.000409626	0.00039451	0.000379952	0.00039141	0.000376967	0.000363056	0.000349658	0.000336755
						4.24	9071.96	#REF!	13.9114	13.5	0	0	4.26745	558.856	2.79428	136.894		8.99169	511.63	0.251183	-502.639		33.0357	443.662	0.677884	-410.626		168.318	381.661	2.16326	-213.343		4.24			0.000458422	0.000441505	0.000425213	0.000437761	0.000421607	0.000406049	0.000391065	0.000376634	0.000362735	0.000373556	0.000359771	0.000346495	0.000333709	0.000321394
						4.26	9102.75	#REF!	13.9771	13.5	0	0	4.26745	563.124	2.81562	139.709		9.00429	519.928	0.238579	-510.923		33.0699	451.278	0.643676	-418.208		168.431	388.728	2.04968	-220.297		4.26			0.000437806	0.00042165	0.00040609	0.000417945	0.000402522	0.000387668	0.000373362	0.000359584	0.000346315	0.000356535	0.000343378	0.000330707	0.000318503	0.00030675
						4.28	9133.3	#REF!	14.0427	14	0	0	4.35794	567.482	2.83741	142.547		9.01632	528.297	0.226555	-519.28		33.1025	458.966	0.611162	-425.863		168.539	395.867	1.94226	-227.328		4.28			0.000418139	0.000402709	0.000387848	0.000399048	0.000384322	0.00037014	0.000356481	0.000343326	0.000330657	0.000340309	0.000327751	0.000315657	0.000304008	0.00029279
						4.3	9163.6	#REF!	14.1083	14	0	0	4.35794	571.84	2.8592	145.406		9.02779	536.738	0.215083	-527.71		33.1334	466.724	0.580254	-433.59		168.64	403.077	1.84064	-234.437		4.3			0.000399378	0.000384641	0.000370447	0.000381028	0.000366967	0.000353426	0.000340384	0.000327823	0.000315725	0.000324843	0.000312855	0.00030131	0.000290191	0.000279483
						4.32	9193.66	#REF!	14.1739	14	0	0	4.35794	576.197	2.88099	148.287		9.03873	545.25	0.204138	-536.212		33.1628	474.552	0.550869	-441.39		168.737	410.36	1.74449	-241.623		4.32			0.000381483	0.000367406	0.000353848	0.000363845	0.000350419	0.000337488	0.000325034	0.000313039	0.000301488	0.000310099	0.000298656	0.000287635	0.000277021	0.000266798
						4.34	9223.48	#REF!	14.2395	14	0	0	4.35794	580.555	2.90278	151.19		9.04918	553.835	0.193694	-544.786		33.1907	482.452	0.52293	-449.261		168.828	417.714	1.65351	-248.886		4.34			0.000364413	0.000350966	0.000338014	0.000347461	0.000334639	0.00032229	0.000310397	0.000298943	0.000287911	0.000296046	0.000285121	0.0002746	0.000264467	0.000254707
						4.36	9253.06	#REF!	14.3052	14	0	0	4.35794	584.913	2.92457	154.114		9.05915	562.493	0.183727	-553.433		33.2173	490.423	0.496362	-457.206		168.914	425.14	1.5674	-256.227		4.36			0.000348131	0.000335284	0.000322911	0.000331838	0.000319593	0.000307799	0.000296441	0.000285501	0.000274966	0.000282651	0.00027222	0.000262175	0.0002525	0.000243182
						4.38	9282.42	#REF!	14.3708	14	0	0	4.35794	589.271	2.94636	157.06		9.06866	571.222	0.174215	-562.153		33.2425	498.465	0.471096	-465.223		168.995	432.639	1.4859	-263.644		4.38			0.0003326	0.000320326	0.000308505	0.000316941	0.000305245	0.000293981	0.000283133	0.000272685	0.000262622	0.000269882	0.000259923	0.000250331	0.000241093	0.000232197
						4.4	9311.55	#REF!	14.4364	14	0	0	4.35794	593.629	2.96815	160.029		9.07774	580.024	0.165137	-570.946		33.2666	506.579	0.447064	-473.312		169.072	440.21	1.40873	-271.137		4.4			0.000317785	0.000306058	0.000294764	0.000302736	0.000291564	0.000280805	0.000270443	0.000260463	0.000250851	0.000257711	0.000248201	0.000239042	0.00023022	0.000221725
						4.42	9340.46	#REF!	14.502	14.5	0	0	7.06072	600.69	3.00345	163.032		9.0864	588.899	0.156471	-579.812		33.2894	514.764	0.424201	-481.474		169.145	447.853	1.33565	-278.708		4.42			0.000303679	0.000292473	0.00028168	0.000289215	0.000278542	0.000268263	0.000258364	0.00024883	0.000239648	0.000246129	0.000237046	0.000228299	0.000219874	0.00021176
						4.44	9369.15	#REF!	14.5676	14.5	0	0	7.06072	607.751	3.03875	166.071		9.09468	597.846	0.148197	-588.751		33.3112	523.02	0.402447	-489.709		169.215	455.569	1.26643	-286.355		4.44			0.000290245	0.000279534	0.000269219	0.000276342	0.000266144	0.000256323	0.000246864	0.000237754	0.000228981	0.000235106	0.00022643	0.000218075	0.000210027	0.000202277
						4.46	9397.63	#REF!	14.6333	14.5	0	0	7.06072	614.811	3.07406	169.145		9.10258	606.866	0.140295	-597.764		33.3319	531.349	0.381743	-498.017		169.28	463.358	1.20085	-294.078		4.46			0.000277449	0.00026721	0.00025735	0.000264084	0.000254339	0.000244953	0.000235914	0.000227208	0.000218824	0.000224613	0.000216325	0.000208342	0.000200654	0.000193249
						4.48	9425.9	#REF!	14.6989	14.5	0	0	7.06072	621.872	3.10936	172.254		9.11012	615.959	0.132749	-606.849		33.3516	539.749	0.362035	-506.397		169.342	471.22	1.1387	-301.878		4.48			0.000265258	0.000255469	0.000246042	0.000252409	0.000243095	0.000234124	0.000225485	0.000217164	0.00020915	0.000214623	0.000206703	0.000199075	0.000191729	0.000184654
						4.5	9453.96	#REF!	14.7645	14.5	0	0	7.06072	628.933	3.14466	175.399		9.11733	625.126	0.125541	-616.008		33.3703	548.221	0.343271	-514.851		169.401	479.156	1.07978	-309.754		4.5			0.000253641	0.000244281	0.000235267	0.000241288	0.000232384	0.000223809	0.00021555	0.000207596	0.000199935	0.000205109	0.00019754	0.000190251	0.00018323	0.000176469
						4.52	9481.81	#REF!	14.8301	14.5	0	0	7.06072	635.994	3.17997	178.579		9.12422	634.365	0.118654	-625.241		33.3882	556.765	0.325403	-523.377		169.457	487.164	1.02393	-317.707		4.52			0.00024257	0.000233619	0.000224998	0.000230693	0.00022218	0.000213981	0.000206085	0.00019848	0.000191156	0.000196048	0.000188814	0.000181846	0.000175136	0.000168673
						4.54	9509.46	#REF!	14.8957	14.5	0	0	7.06072	643.054	3.21527	181.794		9.1308	643.678	0.112073	-634.548		33.4052	565.382	0.308384	-531.977		169.51	495.246	0.970956	-325.735		4.54			0.000232017	0.000223455	0.000215209	0.000220596	0.000212456	0.000204616	0.000197065	0.000189793	0.000182789	0.000187416	0.0001805	0.000173839	0.000167424	0.000161246
						4.56	9536.92	#REF!	14.9614	14.5	0	0	7.06072	650.115	3.25057	185.045		9.13709	653.065	0.105784	-643.928		33.4214	574.071	0.292172	-540.65		169.56	503.401	0.92071	-333.84		4.56			0.000221956	0.000213765	0.000205877	0.000210973	0.000203188	0.00019569	0.000188469	0.000181514	0.000174816	0.000179192	0.000172579	0.000166211	0.000160077	0.00015417
						4.58	9564.18	#REF!	15.027	15	0	0	3.89261	654.008	3.27004	188.315		9.1431	662.525	0.0997729	-653.382		33.4369	582.833	0.276727	-549.396		169.608	511.63	0.873042	-342.022		4.58			0.000212344	0.000204508	0.000196961	0.000201783	0.000194337	0.000187166	0.000180259	0.000173607	0.000167201	0.00017134	0.000165017	0.000158928	0.000153063	0.000147415
						4.6	9591.25	#REF!	15.0926	15	0	0	3.89261	657.9	3.2895	191.604		9.14885	672.059	0.0940275	-662.91		33.4516	591.667	0.26201	-558.216		169.653	501.689	0.827813	-332.036		4.6			0.000203162	0.000195665	0.000188445	0.000193007	0.000185884	0.000179025	0.000172419	0.000166056	0.000159928	0.000163844	0.000157797	0.000151974	0.000146366	0.000140965
						4.62	9618.13	#REF!	15.1582	15	0	0	3.89261	661.793	3.30896	194.913		9.15434	681.666	0.0885354	-672.512		33.4656	600.574	0.247985	-567.109		169.696	509.772	0.784891	-340.076		4.62			0.000194391	0.000187217	0.000180309	0.000184625	0.000177812	0.00017125	0.000164931	0.000158845	0.000152983	0.000156687	0.000150905	0.000145336	0.000139973	0.000134807
						4.64	9644.82	#REF!	15.2238	15	0	0	3.89261	665.685	3.32843	198.242		9.15959	691.348	0.0832851	-682.189		33.479	609.554	0.23462	-576.075		169.737	517.926	0.744155	-348.189		4.64			0.000186011	0.000179147	0.000172536	0.00017662	0.000170103	0.000163826	0.00015778	0.000151958	0.00014635	0.000149854	0.000144324	0.000138998	0.000133869	0.000128929
						4.66	9671.33	#REF!	15.2895	15	0	0	3.89261	669.578	3.34789	201.59		9.16461	701.104	0.0782655	-691.939		33.4917	618.607	0.221881	-585.115		169.776	526.152	0.705485	-356.376		4.66			0.000178006	0.000171437	0.000165111	0.000168975	0.00016274	0.000156735	0.000150951	0.00014538	0.000140016	0.00014333	0.000138041	0.000132947	0.000128041	0.000123316
						4.68	9697.67	#REF!	15.3551	15	0	0	3.89261	673.471	3.36735	204.957		9.16941	710.934	0.073466	-701.765		33.5039	627.733	0.209738	-594.229		169.812	534.449	0.668773	-364.637		4.68			0.000170358	0.000164072	0.000158017	0.000161674	0.000155708	0.000149962	0.000144428	0.000139099	0.000133966	0.000137101	0.000132042	0.000127169	0.000122477	0.000117957
						4.7	9723.82	#REF!	15.4207	15	0	0	3.89261	677.363	3.38682	208.344		9.174	720.838	0.0688766	-711.664		33.5155	636.933	0.198161	-603.417		169.847	542.819	0.633913	-372.972		4.7			0.000163052	0.000157035	0.00015124	0.000154701	0.000148992	0.000143494	0.000138199	0.000133099	0.000128187	0.000131154	0.000126314	0.000121653	0.000117164	0.00011284
						4.72	9749.8	#REF!	15.4863	15	0	0	3.89261	681.256	3.40628	211.75		9.17838	730.817	0.0644878	-721.639		33.5265	646.206	0.187123	-612.679		169.88	551.26	0.600807	-381.38		4.72			0.000156071	0.000150312	0.000144765	0.00014804	0.000142577	0.000137316	0.000132249	0.000127368	0.000122668	0.000125475	0.000120845	0.000116386	0.000112091	0.000107954
						4.74	9775.61	#REF!	15.5519	15.5	0	0	6.18449	687.44	3.4372	215.187		9.18258	740.871	0.0602901	-731.688		33.537	655.552	0.176597	-622.015		169.912	559.774	0.56936	-389.862		4.74			0.00014941	0.000143896	0.000138586	0.000141686	0.000136458	0.000131422	0.000126572	0.000121902	0.000117403	0.000120059	0.000115629	0.000111362	0.000107253	0.000103295
						4.76	9801.24	#REF!	15.6176	15.5	0	0	6.18449	693.625	3.46812	218.655		9.1866	750.999	0.0562746	-741.812		33.5471	664.972	0.166558	-631.425		169.942	568.36	0.539483	-398.418		4.76			0.000143052	0.000137773	0.000132689	0.000135623	0.000130618	0.000125798	0.000121156	0.000116685	0.000112379	0.000114893	0.000110653	0.00010657	0.000102637	9.88499e-05
						4.78	9826.71	#REF!	15.6832	15.5	0	0	6.18449	699.809	3.49905	222.154		9.19044	761.202	0.0524329	-752.012		33.5566	674.466	0.156981	-640.909		169.97	577.018	0.511093	-407.048		4.78			0.000136983	0.000131928	0.000127059	0.000129837	0.000125046	0.000120432	0.000115987	0.000111707	0.000107585	0.000109964	0.000105906	0.000101998	9.82343e-05	9.46093e-05
						4.8	9852.02	#REF!	15.7488	15.5	0	0	6.18449	705.994	3.52997	225.684		9.19412	771.48	0.048757	-762.286		33.5658	684.034	0.147843	-650.468		169.997	585.749	0.484108	-415.752		4.8			0.000131189	0.000126348	0.000121685	0.000124315	0.000119728	0.000115309	0.000111054	0.000106956	0.000103009	0.000105261	0.000101377	9.76361e-05	9.40331e-05	9.05631e-05
						4.82	9877.16	#REF!	15.8144	15.5	0	0	6.18449	712.178	3.56089	229.245		9.19763	781.833	0.0452392	-772.636		33.5745	693.676	0.139124	-660.101		170.023	594.552	0.458456	-424.53		4.82			0.000125656	0.000121019	0.000116554	0.000119044	0.000114651	0.00011042	0.000106345	0.000102421	9.86415e-05	0.000100773	9.70547e-05	9.34732e-05	9.00239e-05	8.67018e-05
						4.84	9902.15	#REF!	15.88	15.5	0	0	6.18449	718.363	3.59181	232.837		9.201	792.262	0.0418723	-783.061		33.5828	703.392	0.130802	-669.809		170.047	603.428	0.434064	-433.381		4.84			0.000120373	0.000115931	0.000111653	0.000114011	0.000109804	0.000105752	0.00010185	9.80912e-05	9.44714e-05	9.64899e-05	9.29292e-05	8.95e-05	8.61972e-05	8.30164e-05
						4.86	9926.97	#REF!	15.9457	15.5	0	0	6.18449	724.547	3.62274	236.46		9.20422	802.765	0.0386492	-793.561		33.5908	713.182	0.122858	-679.591		170.07	612.377	0.410867	-442.307		4.86			0.000115327	0.000111072	0.000106973	0.000109206	0.000105176	0.000101295	9.75569e-05	9.39569e-05	9.04897e-05	9.24009e-05	8.89911e-05	8.57072e-05	8.25444e-05	7.94984e-05
						4.88	9951.64	#REF!	16.0113	16	0	0	6.37763	730.925	3.65462	240.114		9.20731	813.344	0.0355635	-804.137		33.5983	723.046	0.115274	-689.448		170.092	621.4	0.388802	-451.307		4.88			0.000110508	0.00010643	0.000102502	0.000104618	0.000100757	9.70389e-05	9.34579e-05	9.00092e-05	8.66877e-05	8.84974e-05	8.52317e-05	8.20865e-05	7.90574e-05	7.614e-05
						4.9	9976.16	#REF!	16.0769	16	0	0	6.37763	737.303	3.68651	243.801		9.21026	823.999	0.0326088	-814.789		33.6056	732.986	0.108032	-699.38		170.113	630.495	0.367809	-460.381		4.9			0.000105904	0.000101996	9.82319e-05	0.000100235	9.65366e-05	9.29742e-05	8.95433e-05	8.6239e-05	8.30566e-05	8.47705e-05	8.16423e-05	7.86296e-05	7.5728e-05	7.29335e-05
						4.92	10000.5	#REF!	16.1425	16	0	0	6.37763	743.68	3.7184	247.519		9.21309	834.729	0.0297793	-825.516		33.6125	742.999	0.101116	-709.387		170.133	639.663	0.347832	-469.53		4.92			0.000101505	9.77594e-05	9.41519e-05	9.60499e-05	9.25055e-05	8.90919e-05	8.58042e-05	8.26379e-05	7.95884e-05	8.12117e-05	7.82148e-05	7.53285e-05	7.25488e-05	6.98716e-05
						4.94	10024.7	#REF!	16.2081	16	0	0	6.37763	750.058	3.75029	251.27		9.2158	845.535	0.0270692	-836.32		33.6191	753.088	0.0945092	-719.469		170.152	648.905	0.328819	-478.753		4.94			9.7302e-05	9.37114e-05	9.02532e-05	9.20514e-05	8.86545e-05	8.5383e-05	8.22322e-05	7.91977e-05	7.62752e-05	7.78128e-05	7.49413e-05	7.21759e-05	6.95124e-05	6.69473e-05
						4.96	10048.8	#REF!	16.2738	16	0	0	6.37763	756.435	3.78218	255.052		9.2184	856.417	0.0244731	-847.199		33.6254	763.251	0.0881977	-729.626		170.17	658.221	0.310719	-488.05		4.96			9.32851e-05	8.98427e-05	8.65274e-05	8.82311e-05	8.49752e-05	8.18395e-05	7.88194e-05	7.59109e-05	7.31096e-05	7.45662e-05	7.18146e-05	6.91645e-05	6.66122e-05	6.41541e-05
						4.98	10072.7	#REF!	16.3394	16	0	0	6.37763	762.813	3.81407	258.866		9.22089	867.375	0.0219859	-858.154		33.6315	773.49	0.082167	-739.858		170.188	667.61	0.293485	-497.422		4.98			8.94458e-05	8.6145e-05	8.29661e-05	8.45805e-05	8.14594e-05	7.84534e-05	7.55583e-05	7.277e-05	7.00847e-05	7.14647e-05	6.88275e-05	6.62876e-05	6.38415e-05	6.14856e-05
						5	10096.5	#REF!	16.405	16	0	0	6.37763	769.191	3.84595	262.712		9.22327	878.409	0.0196027	-869.186		33.6372	783.803	0.0764037	-750.166		170.204	677.073	0.277073	-506.869		5			8.57755e-05	8.26102e-05	7.95618e-05	8.10917e-05	7.80992e-05	7.52172e-05	7.24416e-05	6.97683e-05	6.71937e-05	6.85012e-05	6.59734e-05	6.35389e-05	6.11942e-05	5.8936e-05
						5.02	10120.2	#REF!	16.4706	16	0	0	6.37763	775.568	3.87784	266.59		9.22555	889.52	0.0173188	-880.294		33.6427	794.192	0.0708952	-760.549		170.22	686.609	0.261441	-516.39		5.02			8.22665e-05	7.92307e-05	7.63069e-05	7.77569e-05	7.48875e-05	7.2124e-05	6.94625e-05	6.68992e-05	6.44305e-05	6.56694e-05	6.32461e-05	6.09122e-05	5.86644e-05	5.64996e-05
						5.04	10143.7	#REF!	16.5362	16.5	0	0	6.33498	781.903	3.90952	270.499		9.22774	900.707	0.0151298	-891.479		33.648	804.656	0.0656293	-771.008		170.235	696.22	0.246548	-525.986		5.04			7.8911e-05	7.59991e-05	7.31946e-05	7.45688e-05	7.18171e-05	6.91669e-05	6.66145e-05	6.41563e-05	6.17888e-05	6.29629e-05	6.06394e-05	5.84017e-05	5.62466e-05	5.4171e-05
						5.06	10167	#REF!	16.6019	16.5	0	0	6.33498	788.238	3.94119	274.44		9.22984	911.97	0.0130315	-902.74		33.653	815.195	0.0605945	-781.542		170.249	705.905	0.232357	-535.656		5.06			7.5702e-05	7.29085e-05	7.0218e-05	7.15206e-05	6.88814e-05	6.63395e-05	6.38915e-05	6.15338e-05	5.92631e-05	6.03757e-05	5.81478e-05	5.6002e-05	5.39354e-05	5.19451e-05
						5.08	10190.3	#REF!	16.6675	16.5	0	0	6.33498	794.573	3.97287	278.413		9.23185	923.31	0.0110199	-914.078		33.6578	825.811	0.0557801	-792.153		170.262	715.664	0.218833	-545.402		5.08			7.26327e-05	6.99524e-05	6.7371e-05	6.86058e-05	6.60741e-05	6.36359e-05	6.12876e-05	5.9026e-05	5.68478e-05	5.79024e-05	5.57657e-05	5.37078e-05	5.17259e-05	4.98171e-05
						5.1	10213.4	#REF!	16.7331	16.5	0	0	6.33498	800.908	4.00454	282.418		9.23378	934.726	0.00909108	-925.492		33.6624	836.501	0.0511756	-802.839		170.275	725.498	0.205942	-555.223		5.1			6.96965e-05	6.71245e-05	6.46475e-05	6.58182e-05	6.33893e-05	6.10502e-05	5.87973e-05	5.66276e-05	5.45379e-05	5.55375e-05	5.34881e-05	5.15143e-05	4.96133e-05	4.77825e-05
						5.12	10236.3	#REF!	16.7987	16.5	0	0	6.33498	807.243	4.03622	286.454		9.23563	946.219	0.00724144	-936.984		33.6668	847.268	0.0467711	-813.601		170.287	735.406	0.193652	-565.119		5.12			6.68873e-05	6.4419e-05	6.20418e-05	6.31517e-05	6.08213e-05	5.85769e-05	5.64153e-05	5.43335e-05	5.23284e-05	5.3276e-05	5.131e-05	4.94166e-05	4.7593e-05	4.58368e-05
						5.14	10259.2	#REF!	16.8643	16.5	0	0	6.33498	813.578	4.06789	290.522		9.23741	957.79	0.00546749	-948.552		33.6711	858.11	0.0425575	-824.439		170.299	745.389	0.181933	-575.09		5.14			6.41993e-05	6.18302e-05	5.95486e-05	6.06009e-05	5.83646e-05	5.62109e-05	5.41366e-05	5.21388e-05	5.02148e-05	5.11131e-05	4.92269e-05	4.74104e-05	4.56608e-05	4.39759e-05
						5.16	10281.9	#REF!	16.93	16.5	0	0	6.33498	819.913	4.09957	294.621		9.23893	969.437	0.00394406	-960.198		33.6751	869.029	0.0385258	-835.354		170.31	755.446	0.170757	-585.136		5.16			0	0	0	5.81604e-05	5.60142e-05	5.39471e-05	5.19564e-05	5.00391e-05	4.81926e-05	4.90442e-05	4.72344e-05	4.54914e-05	4.38126e-05	4.21959e-05
						5.18	10304.4	#REF!	16.9956	16.5	0	0	6.33498	826.248	4.13124	298.753		9.24008	981.161	0.00278825	-971.921		33.679	880.024	0.0346676	-846.345		170.321	765.578	0.160095	-595.257		5.18			0	0	0	0	0	0	0	0	0	4.7065e-05	4.53282e-05	4.36555e-05	4.20445e-05	4.0493e-05
						5.2	10326.9	#REF!	17.0612	17	0	0	6.83571	833.084	4.16542	302.918		9.24095	992.963	0.0019268	-983.722		33.6826	891.095	0.0309748	-857.412		170.331	775.786	0.149924	-605.454		5.2			0	0	0	0	0	0	0	0	0	0	0	0	0	0
						5.22	10349.2	#REF!	17.1268	17	0	0	6.83571	839.92	4.1996	307.118		9.24157	1004.84	0.00130055	-995.601		33.6862	902.242	0.0274399	-868.556		170.341	786.068	0.140218	-615.727		5.22			0	0	0	0	0	0	0	0	0	0	0	0	0	0
						5.24	10371.4	#REF!	17.1924	17	0	0	6.83571	846.755	4.23378	311.351		9.24206	1016.8	0.000811759	-1007.56		33.6896	913.466	0.0240554	-879.776		170.35	796.426	0.130955	-626.075		5.24			0	0	0	0	0	0	0	0	0	0	0	0	0	0
						5.26	10393.5	#REF!	17.2581	17	0	0	6.83571	853.591	4.26796	315.619		9.24241	1028.83	0.000462697	-1019.59		33.6928	924.766	0.0208147	-891.073		170.359	806.858	0.122113	-636.499		5.26			0	0	0	0	0	0	0	0	0	0	0	0	0	0
						5.28	10415.5	#REF!	17.3237	17	0	0	6.83571	860.427	4.30213	319.922		9.24264	1040.94	0.000228479	-1031.7		33.6959	936.143	0.017711	-902.447		170.367	817.367	0.113671	-646.999		5.28			0	0	0	0	0	0	0	0	0	0	0	0	0	0
						5.3	10437.3	#REF!	17.3893	17	0	0	6.83571	867.262	4.33631	324.258		9.24278	1053.13	8.83059e-05	-1043.89		33.6989	947.597	0.0147381	-913.898		170.375	827.951	0.105609	-657.575		5.3			0	0	0	0	0	0	0	0	0	0	0	0	0	0
						5.32	10459.1	#REF!	17.4549	17	0	0	6.83571	874.098	4.37049	328.628		9.24286	1065.4	1.16594e-05	-1056.16		33.7017	959.128	0.0118901	-925.426		170.383	838.61	0.0979099	-668.227		5.32			0	0	0	0	0	0	0	0	0	0	0	0	0	0
						5.34	10480.7	#REF!	17.5205	17.5	0	0	4.21869	878.317	4.39158	333.02		9.24287	1077.75	0	-1068.5		33.7045	970.736	0.0091615	-937.032		170.391	849.346	0.0905556	-678.955		5.34			0	0	0	0	0	0	0	0	0	0	0	0	0	0
						5.36	10502.2	#REF!	17.5862	17.5	0	0	4.21869	882.536	4.41268	337.433		9.24287	1090.17	0	-1080.93		33.7067	982.421	0.00688989	-948.714		170.398	860.157	0.0835299	-689.759		5.36			0	0	0	0	0	0	0	0	0	0	0	0	0	0
						5.38	10523.6	#REF!	17.6518	17.5	0	0	4.21869	886.754	4.43377	341.866		9.24287	1102.67	0	-1093.43		33.7086	994.184	0.00501225	-960.475		170.404	871.044	0.0768171	-700.64		5.38			0	0	0	0	0	0	0	0	0	0	0	0	0	0
						5.4	10544.9	#REF!	17.7174	17.5	0	0	4.21869	890.973	4.45486	346.321		9.24287	1115.25	0	-1106.01		33.7101	1006.02	0.00352668	-972.313		170.411	882.008	0.0704025	-711.597		5.4			0	0	0	0	0	0	0	0	0	0	0	0	0	0
						5.42	10566	#REF!	17.783	17.5	0	0	4.21869	895.192	4.47596	350.797		9.24287	1127.91	0	-1118.67		33.7113	1017.94	0.00227684	-984.229		170.417	893.047	0.0642721	-722.63		5.42			0	0	0	0	0	0	0	0	0	0	0	0	0	0
						5.44	10587.1	#REF!	17.8486	17.5	0	0	4.21869	899.41	4.49705	355.294		9.24287	1140.65	0	-1131.41		33.7123	1029.94	0.00132223	-996.223		170.423	904.163	0.0584124	-733.741		5.44			0	0	0	0	0	0	0	0	0	0	0	0	0	0
						5.46	10608	#REF!	17.9143	17.5	0	0	4.21869	903.629	4.51815	359.812		9.24287	1153.47	0	-1144.22		33.713	1042.01	0.000573703	-1008.29		170.428	915.356	0.0528107	-744.927		5.46			0	0	0	0	0	0	0	0	0	0	0	0	0	0
						5.48	10628.9	#REF!	17.9799	17.5	0	0	4.21869	907.848	4.53924	364.352		9.24287	1166.36	0	-1157.12		33.7136	1054.16	0	-1020.44		170.434	926.625	0.0471384	-756.191		5.48			0	0	0	0	0	0	0	0	0	0	0	0	0	0
						5.5	10649.6		18.0455	18	0	0	0	907.848	4.53924	368.891												170.439	937.971	0.041716	-767.531		5.5
						5.52	10670.3		18.1111	18	0	0	0	907.848	4.53924	373.43												170.445	949.393	0.0365322	-778.949		5.52
						5.54	10690.8		18.1767	18	0	0	0	907.848	4.53924	377.969												170.45	960.893	0.0315759	-790.443		5.54
						5.56	10711.3		18.2424	18	0	0	0	907.848	4.53924	382.509												170.454	972.469	0.0268369	-802.015		5.56
						5.58	10731.6		18.308	18	0	0	0	907.848	4.53924	387.048												170.459	984.123	0.0223052	-813.664		5.58
						5.6	10751.9		18.3736	18	0	0	0	907.848	4.53924	391.587												170.463	995.854	0.0179713	-825.391		5.6
						5.62	10772		18.4392	18	0	0	0	907.848	4.53924	396.126												170.467	1007.66	0.0140946	-837.195		5.62
						5.64	10792.1		18.5048	18.5	0	0	0	907.848	4.53924	400.666												170.47	1019.55	0.0108717	-849.078		5.64
						5.66	10812		18.5705	18.5	0	0	0	907.848	4.53924	405.205												170.473	1031.51	0.00821148	-861.038		5.66
						5.68	10831.9		18.6361	18.5	0	0	0	907.848	4.53924	409.744												170.475	1043.55	0.00603462	-873.077		5.68
						5.7	10851.6		18.7017	18.5	0	0	0	907.848	4.53924	414.283												170.477	1055.67	0.00427236	-885.194		5.7
						5.72	10871.3		18.7673	18.5	0	0	0	907.848	4.53924	418.822												170.478	1067.87	0.0027995	-897.389		5.72
						5.74	10890.9		18.8329	18.5	0	0	0	907.848	4.53924	423.362												170.479	1080.14	0.00164201	-909.663		5.74
						5.76	10910.4		18.8986	18.5	0	0	0	907.848	4.53924	427.901												170.48	1092.5	0.000701924	-922.015		5.76
						5.78	10929.8		18.9642	18.5	0	0	0	907.848	4.53924	432.44												170.481	1104.93	0	-934.445		5.78
[truncated: 136 more columns]

## Sheet: Bridgeport_2
																																			Annual	1.02823	1.03339	1.03857	1.15359	1.15937	1.16518	1.17103	1.1769	1.18279	1.31483	1.32142	1.32804	1.3347	1.34139
	INPUTS			ERROR CHECK		Surge height (m)	Wall Length (m)	sum of middleH * dL	Surge height (ft)	Rounding (ft)	Area (sq m)	Buildings	Building Values (million $)	Cum Value	Marginal Damage	Damage	2030	Expected Benefit (million $, PV)	Total Cost (million $, PV)	Residual Dam (million $, PV)	Net Benefit (million $, PV)	2080	Expected Benefit (million $, PV)	Total Cost (million $, PV)	Residual Dam (million $, PV)	Net Benefit (million $, PV)	2130	Expected Benefit (million $, PV)	Total Cost (million $, PV)	Residual Dam (million $, PV)	Net Benefit (million $, PV)		Surge height (m)		YEAR-2030	0	1	2	3	4	5	6	7	8	9	10	11	12	13
	SPATIAL DATA					1.84	1587.39	#REF!	6.03704	6	2940.79	0	0	0	0	0		0	4.97213	33.8374	-4.97213		0	2.49311	156.339	-2.49311		0	0.655842	1128.59	-0.655842		1.84		AGE	0	1	2	3	4	5	6	7	8	9	10	11	12	13
	Target City	Bridgeport				1.86	1637.14	#REF!	6.10266	6	2940.79	0	0	0	0	0		0	5.40888	33.8374	-5.40888		0	2.77127	156.339	-2.77127		0	0.782761	1128.59	-0.782761		1.86			0	0	0	0	0	0	0	0	0	0	0	0	0	0
	Policy Year (base year: 2020)	#REF!				1.88	1689.16	#REF!	6.16828	6	2940.79	0	0	0	0	0		0	5.87836	33.8374	-5.87836		0	3.07344	156.339	-3.07344		0	0.925394	1128.59	-0.925394		1.88			0	0	0	0	0	0	0	0	0	0	0	0	0	0
	SLR rate (before policy)	3.14	mm/year			1.9	1743.66	#REF!	6.2339	6	2940.79	0	0	0	0	0		0	6.38317	33.8374	-6.38317		0	3.40159	156.339	-3.40159		0	1.08507	1128.59	-1.08507		1.9			0	0	0	0	0	0	0	0	0	0	0	0	0	0
	SLR rate (after policy)	#REF!	mm/year			1.92	1800.81	#REF!	6.29952	6	2940.79	0	0	0	0	0		0	6.92616	33.8374	-6.92616		0	3.75784	156.339	-3.75784		0	1.26326	1128.59	-1.26326		1.92			0	0	0	0	0	0	0	0	0	0	0	0	0	0
	MHHW	1.06	meter			1.94	1860.84	#REF!	6.36514	6	2940.79	0	0	0	0	0		0	7.5104	33.8374	-7.5104		0	4.14452	156.339	-4.14452		0	1.46157	1128.59	-1.46157		1.94			0	0	0	0	0	0	0	0	0	0	0	0	0	0
						1.96	1923.92	#REF!	6.43076	6	2940.79	0	0	0	0	0		0	8.13917	33.8374	-8.13917		0	4.5641	156.339	-4.5641		0	1.68174	1128.59	-1.68174		1.96			0	0	0	0	0	0	0	0	0	0	0	0	0	0
						1.98	1990.24	#REF!	6.49638	6	2940.79	0	0	0	0	0		0	8.8159	33.8374	-8.8159		0	5.01924	156.339	-5.01924		0	1.92565	1128.59	-1.92565		1.98			0	0	0	0	0	0	0	0	0	0	0	0	0	0
	GEV ESTIMATION					2	2059.92	#REF!	6.562	6.5	12902.5	18.2802	2.22835	2.22835	0.0111418	0.0111418		0.0452205	9.54404	33.7922	-9.49882		0.423596	5.51264	155.915	-5.08904		0	2.19529	1128.59	-2.19529		2			0.00101245	0.000975092	0.00093911	0.00106567	0.00102635	0.000988474	0.000951997	0.000916867	0.000883033	0.00100769	0.000970508	0.000934694	0.000900202	0.000866983
	μ (location)	1.845				2.02	2133.03	#REF!	6.62762	6.5	12902.5	18.2802	2.22835	4.4567	0.0222835	0.0334253		0.158726	10.3269	33.6787	-10.1681		0	6.04697	156.339	-6.04697		0	2.4927	1128.59	-2.4927		2.02			0.00259438	0.00249865	0.00240644	0.00271336	0.00261324	0.0025168	0.00242393	0.00233448	0.00224833	0.00255134	0.00245719	0.00236652	0.00227919	0.00219508
	σ (scale)	0.1544				2.04	2209.5	#REF!	6.69324	6.5	12902.5	18.2802	2.22835	6.68506	0.0334253	0.0668506		0.349483	11.1672	33.4879	-10.8177		1.91938	6.6247	154.42	-4.70533		0.876349	2.81992	1127.72	-1.94357		2.04			0.00446388	0.00429915	0.00414051	0.00463528	0.00446423	0.00429949	0.00414083	0.00398802	0.00384086	0.00433073	0.00417092	0.004017	0.00386877	0.003726
	k (shape)	0.0752				2.06	2289.1	#REF!	6.75886	6.5	12902.5	18.2802	2.22835	8.91341	0.044567	0.111418		0.617971	12.0671	33.2194	-11.4492		4.64273	7.24782	151.696	-2.60509		4.68398	3.17881	1123.91	1.50517		2.06			0.0064513	0.00621323	0.00598395	0.00664619	0.00640093	0.00616473	0.00593724	0.00571814	0.00550713	0.00616521	0.0059377	0.00571859	0.00550756	0.00530432
						2.08	2371.43	#REF!	6.82448	6.5	12902.5	18.2802	2.22835	11.1418	0.0557088	0.167126		0.960026	13.0274	32.8774	-12.0674		8.0012	7.9176	148.338	0.0835992		12.7321	3.57092	1115.86	9.16121		2.08			0.00846377	0.00815144	0.00785063	0.0086447	0.00832569	0.00801846	0.00772256	0.00743759	0.00716313	0.00795586	0.00766227	0.00737952	0.0071072	0.00684493
	Coefficients of the cost function					2.1	2455.84	#REF!	6.8901	6.5	12902.5	18.2802	2.22835	13.3701	0.0668506	0.233977		1.3694	14.0474	32.468	-12.678		11.8708	8.63434	144.468	3.23645		26.0212	3.99735	1102.57	22.0238		2.1			0.0104596	0.0100736	0.00970189	0.0105853	0.0101947	0.00981848	0.00945616	0.00910721	0.00877114	0.00965831	0.0093019	0.00895864	0.00862805	0.00830966
	coef1	0.478344				2.12	2541.5	#REF!	6.95572	6.5	12902.5	18.2802	2.22835	15.5985	0.0779923	0.311969		1.83941	15.1247	31.998	-13.2853		16.1223	9.39719	140.217	6.7251		45.1939	4.45857	1083.4	40.7353		2.12			0.0124301	0.0119714	0.0115296	0.0124585	0.0119988	0.011556	0.0111295	0.0107188	0.0103233	0.0112633	0.0108477	0.0104474	0.0100618	0.00969052
	coef2	0.0014616				2.14	2627.42	#REF!	7.02134	7	10518.3	14.9022	1.81658	17.415	0.0870752	0.399044		2.36124	16.2552	31.4762	-13.894		20.6102	10.2042	135.729	10.406		69.203	4.95446	1059.39	64.2485		2.14			0.0143129	0.0137847	0.013276	0.0142035	0.0136794	0.0131746	0.0126884	0.0122202	0.0117692	0.0127174	0.0122481	0.0117961	0.0113608	0.0109416
	coef3	-4.79265e-07		Buildings exist under MHHW		2.16	2712.61	#REF!	7.08696	7	10518.3	14.9022	1.81658	19.2316	0.0961581	0.495203		2.92826	17.4339	30.9091	-14.5057		25.2148	11.0527	131.124	14.1621		99.3015	5.4843	1029.29	93.8172		2.16			0.0161509	0.0155549	0.0149809	0.0158672	0.0152817	0.0147178	0.0141747	0.0136516	0.0131478	0.0140663	0.0135473	0.0130473	0.0125659	0.0121022
	coef4	6.22975e-11				2.18	2796.14	#REF!	7.15258	7	10518.3	14.9022	1.81658	21.0482	0.105241	0.600443		3.53591	18.6553	30.3015	-15.1194		29.8408	11.9394	126.498	17.9014		133.743	6.04701	994.85	127.696		2.18			0.018012	0.0173473	0.0167072	0.0174943	0.0168488	0.016227	0.0156282	0.0150515	0.0144961	0.0153537	0.0147871	0.0142415	0.0137159	0.0132098
	q	3.73333e+06				2.2	2877.26	#REF!	7.2182	7	10518.3	14.9022	1.81658	22.8648	0.114324	0.714767		4.18084	19.9141	29.6566	-15.7333		34.4152	12.8612	121.924	21.5541		173.658	6.64136	954.935	167.017		2.2			0.0196347	0.0189102	0.0182123	0.0191543	0.0184474	0.0177667	0.0171111	0.0164796	0.0158715	0.0166193	0.016006	0.0154154	0.0148465	0.0142987
	Growth Rate	0.005	%/year			2.22	2955.44	#REF!	7.28382	7	10518.3	14.9022	1.81658	24.6813	0.123407	0.838174		4.85962	21.2058	28.9778	-16.3462		38.885	13.8151	117.454	25.0699		216.899	7.26612	911.694	209.633		2.22			0.0210068	0.0202316	0.0194851	0.0205687	0.0198096	0.0190786	0.0183746	0.0176965	0.0170435	0.017925	0.0172635	0.0166264	0.0160129	0.015422
	discount rate	0.0426	%/year			2.24	3030.35	#REF!	7.34944	7	10518.3	14.9022	1.81658	26.4979	0.13249	0.970664		5.56849	22.5268	28.2689	-16.9583		43.2138	14.799	113.125	28.4147		264.552	7.92023	864.04	256.632		2.24			0.0221267	0.0213101	0.0205238	0.0217324	0.0209304	0.020158	0.0194142	0.0186977	0.0180077	0.0190092	0.0183077	0.0176321	0.0169815	0.0163548
	useful_life	30	years			2.26	3101.86	#REF!	7.41506	7	10518.3	14.9022	1.81658	28.3145	0.141572	1.11224		6.30317	23.8745	27.5342	-17.5713		47.3793	15.8111	108.96	31.5682		314.308	8.60285	814.284	305.705		2.26			0.0230007	0.0221519	0.0213345	0.0226493	0.0218135	0.0210086	0.0202333	0.0194867	0.0187676	0.0198728	0.0191394	0.0184331	0.0177529	0.0170978
	CapEx	0.005				2.28	3169.96	#REF!	7.48068	7	10518.3	14.9022	1.81658	30.1311	0.150655	1.26289		7.05933	25.2472	26.7781	-18.1879		51.3708	16.8501	104.968	34.5207		367.257	9.31337	761.335	357.944		2.28			0.0236416	0.0227692	0.0219289	0.0233304	0.0224694	0.0216403	0.0208417	0.0200726	0.0193319	0.0205233	0.019766	0.0190366	0.0183341	0.0176575
	Difference	0.02	meter			2.3	3234.74	#REF!	7.5463	7.5	16995.7	24.0793	2.93526	33.0663	0.165332	1.42822		7.83534	26.6439	26.0021	-18.8086		55.2019	17.9154	101.137	37.2865		421.313	10.0514	707.28	411.261		2.3			0.0241606	0.023269	0.0224104	0.0238846	0.0230032	0.0221544	0.0213368	0.0205495	0.0197911	0.021056	0.020279	0.0195306	0.0188099	0.0181158
	Minimum height where buildings locate	6.5	ft			2.32	3296.37	#REF!	7.61192	7.5	16995.7	24.0793	2.93526	36.0016	0.180008	1.60823		8.62844	28.0642	25.209	-19.4357		58.8865	19.0064	97.4524	39.8801		473.014	10.8166	655.579	462.198		2.32			0.0245493	0.0236434	0.0227709	0.0243037	0.0234068	0.0225431	0.0217112	0.02091	0.0201384	0.0214632	0.0206711	0.0199083	0.0191737	0.0184661
	A factor to account for other damages than buildings	2				2.34	3355.03	#REF!	7.67754	7.5	16995.7	24.0793	2.93526	38.9369	0.194684	1.80292		9.43497	29.5077	24.4024	-20.0728		62.4398	20.123	93.8991	42.3168		520.378	11.6089	608.215	508.769		2.34			0.0248055	0.0238901	0.0230085	0.0245854	0.0236782	0.0228044	0.0219629	0.0211524	0.0203719	0.0217431	0.0209408	0.020168	0.0194238	0.018707
	Ratio of houses w/ basements	1	(1=All have basements; 0=No basements)			2.36	3410.92	#REF!	7.74316	7.5	16995.7	24.0793	2.93526	41.8721	0.209361	2.01228		10.2507	30.9748	23.5867	-20.7241		65.8787	21.2652	90.4602	44.6135		563.879	12.4283	564.714	551.451		2.36			0.0249316	0.0240116	0.0231255	0.0247327	0.02382	0.022941	0.0220944	0.0212791	0.0204939	0.0218984	0.0210904	0.0203121	0.0195625	0.0188406
	Average height of the first floor	0.9	meter			2.38	3464.24	#REF!	7.80878	7.5	16995.7	24.0793	2.93526	44.8074	0.224037	2.23631		11.0709	32.4656	22.7665	-21.3947		69.2215	22.433	87.1173	46.7886		603.711	13.2748	524.881	590.437		2.38			0.0249337	0.0240136	0.0231275	0.0247518	0.0238384	0.0229587	0.0221115	0.0212956	0.0205097	0.0219351	0.0211257	0.0203461	0.0195953	0.0188722
	Coastal length 12ft	5050				2.4	3515.17	#REF!	7.8744	7.5	16995.7	24.0793	2.93526	47.7426	0.238713	2.47503		11.8908	33.9805	21.9466	-22.0897		72.4834	23.6266	83.8554	48.8568		640.087	14.1485	488.506	625.938		2.4			0.0248203	0.0239044	0.0230223	0.0246516	0.023742	0.0228658	0.022022	0.0212094	0.0204267	0.0218614	0.0210546	0.0202777	0.0195294	0.0188087
	OUTPUTS	2030	2080	2130		2.42	3563.91	#REF!	7.94002	7.5	16995.7	24.0793	2.93526	50.6779	0.253389	2.72842		12.7062	35.5199	21.1312	-22.8136		75.6761	24.8463	80.6628	50.8298		673.234	15.0494	455.359	658.185		2.42			0.0246016	0.0236937	0.0228194	0.0244428	0.0235408	0.0226721	0.0218354	0.0210297	0.0202536	0.021687	0.0208867	0.020116	0.0193736	0.0186587
	Optimal Level of Flood Defense	No_Wall	2.8	3.26		2.44	3610.63	#REF!	8.00564	8	18199.9	25.7853	3.14323	53.8211	0.269106	2.99752		13.5136	37.0841	20.3238	-23.5706		78.8078	26.0922	77.5311	52.7156		703.401	15.9778	425.192	687.423		2.44			0.0242968	0.0234002	0.0225367	0.0241449	0.023254	0.0223958	0.0215694	0.0207734	0.0200069	0.0214301	0.0206393	0.0198777	0.0191442	0.0184377
	Maximum height of Walls					2.46	3655.47	#REF!	8.07126	8	18199.9	25.7853	3.14323	56.9644	0.284822	3.28234		14.3097	38.6738	19.5277	-24.364		81.8849	27.3647	74.454	54.5202		730.834	16.9338	397.759	713.9		2.46			0.0239149	0.0230324	0.0221825	0.0237675	0.0228904	0.0220457	0.0212322	0.0204487	0.0196941	0.0210995	0.0203208	0.019571	0.0188488	0.0181532
	Average height of Walls	#VALUE!	1.484	1.684		2.48	3698.57	#REF!	8.13688	8	18199.9	25.7853	3.14323	60.1076	0.300538	3.58288		15.0919	40.2892	18.7455	-25.1973		84.9096	28.6639	71.4293	56.2457		755.779	17.9176	372.814	737.861		2.48			0.0234651	0.0225992	0.0217652	0.02332	0.0224595	0.0216307	0.0208325	0.0200637	0.0193233	0.020704	0.01994	0.0192042	0.0184955	0.017813
	Average Elevation of wall	1.1	1.316	1.576		2.5	3740.07	#REF!	8.2025	8	18199.9	25.7853	3.14323	63.2508	0.316254	3.89914		15.8576	41.9307	17.9798	-26.0731		87.8818	29.9902	68.457	57.8916		778.472	18.9292	350.121	759.543		2.5			0.0229567	0.0221095	0.0212936	0.0228123	0.0219705	0.0211598	0.0203789	0.0196269	0.0189026	0.0202529	0.0195056	0.0187858	0.0180925	0.0174249
	Wall Length	No_Wall	4229.24	4728.45		2.52	3780.09	#REF!	8.26812	8	18199.9	25.7853	3.14323	66.3941	0.33197	4.23111		16.605	43.5988	17.2324	-26.9939		90.7994	31.3438	65.5394	59.4557		799.144	19.9689	329.449	779.175		2.52			0.0223987	0.0215722	0.0207761	0.0222539	0.0214327	0.0206418	0.01988	0.0191464	0.0184399	0.0197551	0.0190261	0.018324	0.0176478	0.0169965
	Cost of Wall	No_Wall	53.2753	79.4898		2.54	3818.73	#REF!	8.33374	8	18199.9	25.7853	3.14323	69.5373	0.347686	4.57879		17.3323	45.2939	16.5051	-27.9616		93.6587	32.7248	62.6802	60.9339		818.014	21.0369	310.579	796.977		2.54			0.0218001	0.0209956	0.0202208	0.0216537	0.0208546	0.0200851	0.0193439	0.0186301	0.0179426	0.0192188	0.0185096	0.0178265	0.0171687	0.0165351
	Expected Benefit	No_Wall	124.089	1095.15		2.56	3856.08	#REF!	8.39936	8	18199.9	25.7853	3.14323	72.6805	0.363403	4.94219		18.0382	47.0162	15.7992	-28.978		96.454	34.1336	59.8849	62.3203		835.291	22.1332	293.302	813.157		2.56			0.0211688	0.0203877	0.0196353	0.0210203	0.0202446	0.0194975	0.018778	0.0180851	0.0174177	0.018652	0.0179637	0.0173008	0.0166623	0.0160475
	Net Benefit	#VALUE!	70.8136	1015.66		2.58	3892.23	#REF!	8.46498	8	18199.9	25.7853	3.14323	75.8238	0.379119	5.32131		18.7217	48.7661	15.1158	-30.0444		99.1792	35.5704	57.1596	63.6089		851.169	23.2581	277.424	827.911		2.58			0.0205125	0.0197556	0.0190266	0.0203614	0.01961	0.0188864	0.0181894	0.0175182	0.0168717	0.0180618	0.0173953	0.0167534	0.0161351	0.0155397
	Residual Damage	33.8374	32.25	33.4446		2.6	3927.26	#REF!	8.5306	8.5	33404.4	47.3269	5.76915	81.5929	0.407965	5.72928		19.3835	50.5439	14.4539	-31.1603		101.835	37.0353	54.5042	64.7994		865.865	24.4117	262.728	841.453		2.6			0.0198836	0.0191499	0.0184432	0.0197293	0.0190012	0.0183001	0.0176248	0.0169744	0.016348	0.0174949	0.0168493	0.0162275	0.0156287	0.015052
	Expected Damage	33.8374	156.339	1128.59		2.62	3961.25	#REF!	8.59622	8.5	33404.4	47.3269	5.76915	87.3621	0.43681	6.16609		20.0244	52.3499	13.813	-32.3255		104.418	38.5286	51.9209	65.8893		879.57	25.5942	249.023	853.976		2.62			0.0192747	0.0185634	0.0178784	0.0191169	0.0184114	0.017732	0.0170777	0.0164475	0.0158405	0.0169451	0.0163198	0.0157176	0.0151376	0.014579
						2.64	3994.26	#REF!	8.66184	8.5	33404.4	47.3269	5.76915	93.1312	0.465656	6.63174		20.6446	54.1843	13.1928	-33.5398		106.927	40.0505	49.4123	66.876		892.445	26.8057	236.148	865.639		2.64			0.0186805	0.0179911	0.0173272	0.018519	0.0178356	0.0171774	0.0165435	0.0159331	0.0153451	0.0164081	0.0158026	0.0152194	0.0146578	0.0141169
0.9144	Surge height (ft)	Area submerged (sq m)	Area (sq m)	Buildings	Building Values (million $)	2.66	4026.34	#REF!	8.72746	8.5	33404.4	47.3269	5.76915	98.9004	0.494502	7.12625		21.2445	56.0475	12.5929	-34.803		109.358	41.6012	46.9812	67.7566		904.618	28.0464	223.975	876.571		2.66			0.0180974	0.0174295	0.0167864	0.0179322	0.0172704	0.0166331	0.0160193	0.0154282	0.0148589	0.0158808	0.0152948	0.0147304	0.0141868	0.0136633
1.0668	3	17999.1	0	0	0	2.68	4057.56	#REF!	8.79308	8.5	33404.4	47.3269	5.76915	104.67	0.523348	7.64959		21.8243	57.9396	12.0131	-36.1153		111.709	43.1808	44.6296	68.5285		916.19	29.3165	212.403	886.873		2.68			0.017523	0.0168764	0.0162536	0.0173542	0.0167138	0.016097	0.015503	0.0149309	0.0143799	0.0153615	0.0147946	0.0142487	0.0137229	0.0132165
1.2192	3.5	20451.9	2452.8	0	0	2.7	4087.97	#REF!	8.8587	8.5	33404.4	47.3269	5.76915	110.439	0.552193	8.20179		22.3844	59.8609	11.453	-37.4765		113.98	44.7895	42.3592	69.1903		927.239	30.616	201.354	896.623		2.7			0.016956	0.0163303	0.0157276	0.0167838	0.0161644	0.0155679	0.0149935	0.0144402	0.0139073	0.014849	0.0143011	0.0137733	0.0132651	0.0127756
1.3716	4	26578.3	6126.4	0	0	2.72	4117.6	#REF!	8.92432	8.5	33404.4	47.3269	5.76915	116.208	0.581039	8.78283		22.925	61.8117	10.9124	-38.8867		116.168	46.4274	40.171	69.7405		937.822	31.9451	190.771	905.877		2.72			0.0163956	0.0157906	0.0152079	0.0162203	0.0156218	0.0150453	0.0144901	0.0139554	0.0134404	0.014343	0.0138137	0.0133039	0.012813	0.0123402
1.524	4.5	42289.9	15711.6	0	0	2.74	4146.51	#REF!	8.98994	8.5	33404.4	47.3269	5.76915	121.977	0.609885	9.39271		23.4463	63.792	10.3911	-40.3458		118.273	48.0948	38.0654	70.1786		947.987	33.304	180.606	914.683		2.74			0.0158418	0.0152572	0.0146942	0.0156638	0.0150857	0.014529	0.0139929	0.0134765	0.0129792	0.0138433	0.0133325	0.0128405	0.0123666	0.0119103
1.6764	5	64548.3	22258.4	0	0	2.76	4174.73	#REF!	9.05556	9	28845.5	40.868	4.98181	126.959	0.634794	10.0275		23.9483	65.8022	9.88912	-41.8539		120.295	49.7919	36.0435	70.5036		957.762	34.6928	170.831	923.069		2.76			0.0152887	0.0147245	0.0141812	0.0151084	0.0145508	0.0140139	0.0134968	0.0129987	0.012519	0.0133451	0.0128526	0.0123783	0.0119215	0.0114816
1.8288	5.5	98033.6	33485.3	0	0	2.78	4202.29	#REF!	9.12118	9	28845.5	40.868	4.98181	131.941	0.659703	10.6872		24.4312	67.8423	9.40617	-43.4111		122.234	51.5186	34.1051	70.7151		967.189	36.1116	161.404	931.077		2.78			0.0147386	0.0141947	0.0136709	0.0145564	0.0140192	0.0135019	0.0130037	0.0125238	0.0120617	0.0128503	0.0123761	0.0119194	0.0114795	0.0110559
1.9812	6	121560	23526.3	0	0	2.8	4229.24	#REF!	9.1868	9	28845.5	40.868	4.98181	136.922	0.684612	11.3718		24.8953	69.9126	8.94208	-45.0173		124.089	53.2753	32.25	70.8136		976.258	37.5606	152.335	938.697		2.8			0.0141934	0.0136696	0.0131652	0.0140098	0.0134929	0.0129949	0.0125154	0.0120536	0.0116088	0.0123607	0.0119046	0.0114653	0.0110422	0.0106347
2.1336	6.5	211878	90317.8	127.961	15.5985	2.82	4255.59	#REF!	9.25242	9	28845.5	40.868	4.98181	141.904	0.709521	12.0813		25.3408	72.0133	8.49657	-46.6725		125.862	55.062	30.477	70.7999		984.978	39.0399	143.615	945.938		2.82			0.0136549	0.013151	0.0126657	0.0134705	0.0129734	0.0124946	0.0120336	0.0115895	0.0111618	0.011878	0.0114396	0.0110175	0.0106109	0.0102194
2.286	7	296024	84146.3	119.217	14.5326	2.84	4281.39	#REF!	9.31804	9	28845.5	40.868	4.98181	146.886	0.73443	12.8158		25.7681	74.1445	8.06931	-48.3764		127.554	56.8788	28.7849	70.6752		993.353	40.5496	135.24	952.803		2.84			0.0131247	0.0126404	0.0121739	0.0129399	0.0124624	0.0120025	0.0115596	0.011133	0.0107222	0.0114034	0.0109826	0.0105773	0.010187	0.0098111
2.4384	7.5	414994	118970	168.555	20.5468	2.86	4306.65	#REF!	9.38366	9	28845.5	40.868	4.98181	151.868	0.759339	13.5751		26.1775	76.3064	7.65991	-50.1289		129.167	58.726	27.1718	70.4411		1001.38	42.0899	127.21	959.293		2.86			0.0126042	0.0121391	0.0116911	0.0124194	0.0119611	0.0115197	0.0110946	0.0106852	0.0102909	0.0109383	0.0105347	0.0101459	0.00977154	0.00941095
2.5908	8	560593	145599	206.283	25.1459	2.88	4331.4	#REF!	9.44928	9	28845.5	40.868	4.98181	156.85	0.784248	14.3594		26.5695	78.4991	7.26794	-51.9296		130.703	60.6036	25.6358	70.0995		1009.07	43.6608	119.526	965.406		2.88			0.0120945	0.0116482	0.0112184	0.0119102	0.0114707	0.0110474	0.0106397	0.0102471	0.00986894	0.0104837	0.0100968	0.00972424	0.00936539	0.00901979
2.7432	8.5	827828	267235	378.615	46.1532	2.9	4355.67	#REF!	9.5149	9.5	17827.3	25.2575	3.07889	159.929	0.799643	15.159		26.9442	80.7228	6.89318	-53.7785		132.163	62.5117	24.1756	69.6516		1016.39	45.2626	112.198	971.132		2.9			0.0115894	0.0111617	0.0107499	0.0114061	0.0109852	0.0105798	0.0101894	0.00981336	0.00945123	0.0100341	0.00966378	0.00930717	0.00896372	0.00863294
2.8956	9	1.02975e+06	201919	286.076	34.8727	2.92	4379.47	#REF!	9.58052	9.5	17827.3	25.2575	3.07889	163.007	0.815037	15.974		27.3021	82.9775	6.53533	-55.6755		133.55	64.4505	22.7893	69.099		1023.36	46.8952	105.231	976.467		2.92			0.0110917	0.0106824	0.0102882	0.0109098	0.0105072	0.0101195	0.00974606	0.00938641	0.00904003	0.00959186	0.0092379	0.00889701	0.00856869	0.00825249
3.048	9.5	1.17236e+06	142618	202.06	24.6311	2.94	4402.83	#REF!	9.64614	9.5	17827.3	25.2575	3.07889	166.086	0.830432	16.8045		27.6434	85.2636	6.19399	-57.6202		134.864	66.4202	21.475	68.4437		1029.97	48.5589	98.6228	981.411		2.94			0.0106037	0.0102124	0.00983551	0.0104237	0.010039	0.00966855	0.00931176	0.00896814	0.0086372	0.00915905	0.00882107	0.00849555	0.00818205	0.00788012
3.2004	10	1.30514e+06	132773	188.111	22.9307	2.96	4425.76	#REF!	9.71176	9.5	17827.3	25.2575	3.07889	169.165	0.845826	17.6503		27.9687	87.581	5.86873	-59.6123		136.109	68.4207	20.2302	67.688		1036.22	50.2537	92.3709	985.968		2.96			0.0101271	0.00975336	0.00939344	0.00994935	0.0095822	0.00922859	0.00888804	0.00856006	0.00824417	0.00873716	0.00841475	0.00810423	0.00780517	0.00751714
3.3528	10.5	1.40231e+06	97167.6	137.666	16.7815	2.98	4448.28	#REF!	9.77738	9.5	17827.3	25.2575	3.07889	172.244	0.86122	18.5115		28.2783	89.9299	5.55906	-61.6516		137.286	70.4523	19.0525	66.8341		1042.13	51.9798	86.4676	990.145		2.98			0.00966333	0.00930673	0.0089633	0.00948823	0.0091381	0.00880088	0.00847611	0.00816333	0.00786209	0.00832737	0.00802007	0.00772412	0.00743908	0.00716456
3.5052	11	1.49806e+06	95754.3	135.664	16.5374	3	4470.42	#REF!	9.843	9.5	17827.3	25.2575	3.07889	175.323	0.876615	19.3881		28.5729	92.3105	5.26446	-63.7376		138.4	72.515	17.9391	65.8847		1047.69	53.7373	80.9034	993.952		3			0.00921351	0.00887351	0.00854606	0.00904133	0.00870769	0.00838636	0.00807688	0.00777883	0.00749178	0.00793053	0.00763788	0.00735603	0.00708458	0.00682314
3.6576	11.5	1.55528e+06	57225.3	81.0761	9.88318	3.02	4492.17	#REF!	9.90862	9.5	17827.3	25.2575	3.07889	178.402	0.892009	20.2801		28.853	94.7228	4.9844	-65.8699		139.451	74.609	16.8874	64.8424		1052.93	55.5263	75.6669	997.4		3.02			0.00877836	0.00845443	0.00814244	0.00860937	0.00829167	0.00798569	0.007691	0.00740719	0.00713385	0.00754728	0.00726877	0.00700054	0.00674221	0.00649341
3.81	12	1.61526e+06	59974.4	84.971	10.358	3.04	4513.56	#REF!	9.97424	9.5	17827.3	25.2575	3.07889	181.481	0.907404	21.1875		29.1191	97.1671	4.71833	-68.048		140.444	76.7344	15.8946	63.7098		1057.85	57.3469	70.7453	1000.5		3.04			0.00835843	0.00804999	0.00775293	0.00819285	0.00789052	0.00759934	0.00731891	0.00704883	0.00678871	0.00717801	0.00691313	0.00665802	0.00641233	0.0061757
3.9624	12.5	1.67014e+06	54878.5	77.7512	9.47787	3.06	4534.61	#REF!	10.0399	10	16596.6	23.5139	2.86634	184.347	0.921735	22.1093		29.3717	99.6433	4.4657	-70.2716		141.381	78.8913	14.9581	62.4895		1062.47	59.1992	66.1253	1003.27		3.06			0.00795365	0.00766015	0.00737748	0.00779167	0.00750414	0.00722722	0.00696053	0.00670367	0.00645629	0.00682263	0.00657086	0.00632839	0.00609486	0.00586995
4.1148	13	1.71598e+06	45846.8	64.9552	7.91804	3.08	4555.32	#REF!	10.1055	10	16596.6	23.5139	2.86634	187.213	0.936067	23.0453		29.6114	102.152	4.22596	-72.5402		142.264	81.0797	14.075	61.1842		1066.8	61.0833	61.793	1005.72		3.08			0.00756428	0.00728514	0.00701631	0.00740606	0.00713276	0.00686955	0.00661605	0.0063719	0.00613677	0.0064813	0.00624213	0.00601178	0.00578994	0.00557628
4.2672	13.5	1.74956e+06	33580.3	47.5762	5.79953	3.1	4575.71	#REF!	10.1711	10	16596.6	23.5139	2.86634	190.08	0.950399	23.9957		29.8388	104.692	3.99856	-74.8533		143.096	83.2998	13.2429	59.7962		1070.86	62.9994	57.7341	1007.86		3.1			0.0071904	0.00692506	0.00666951	0.00703607	0.00677642	0.00652636	0.00628553	0.00605358	0.00583019	0.00615405	0.00592696	0.00570824	0.00549759	0.00529472
4.4196	14	1795074	45509.2	64.4769	7.85973	3.12	4595.78	#REF!	10.2367	10	16596.6	23.5139	2.86634	192.946	0.964731	24.9605		30.0544	107.265	3.78296	-77.2106		143.88	85.5517	12.4589	58.3282		1074.66	64.9475	53.9343	1009.71		3.12			0.00683198	0.00657986	0.00633705	0.00668164	0.00643508	0.00619761	0.00596891	0.00574864	0.00553651	0.00584079	0.00562526	0.00541767	0.00521775	0.00502521
4.572	14.5	1.84492e+06	49849.7	70.6264	8.60936	3.14	4615.56	#REF!	10.3023	10	16596.6	23.5139	2.86634	195.812	0.979062	25.9395		30.2588	109.87	3.57863	-79.6116		144.618	87.8355	11.7207	56.7826		1078.21	66.9277	50.3793	1011.29		3.14			0.00648887	0.00624942	0.0060188	0.0063426	0.00610855	0.00588313	0.00566603	0.00545694	0.00525557	0.00554135	0.00533687	0.00513993	0.00495025	0.00476758
4.7244	15	1.87734e+06	32416.6	45.9274	5.59855	3.16	4635.05	#REF!	10.368	10	16596.6	23.5139	2.86634	198.679	0.993394	26.9329		30.4524	112.508	3.38503	-82.0559		145.313	90.1513	11.0258	55.1618		1081.54	68.9402	47.0554	1012.6		3.16			0.00616083	0.00593349	0.00571453	0.00601869	0.00579659	0.00558268	0.00537667	0.00517826	0.00498717	0.00525547	0.00506154	0.00487476	0.00469487	0.00452162
4.8768	15.5	1.92052e+06	43180.2	61.1772	7.4575	3.18	4654.25	#REF!	10.4336	10	16596.6	23.5139	2.86634	201.545	1.00773	27.9407		30.6357	115.179	3.20166	-84.543		145.967	92.4991	10.3718	53.4679		1084.64	70.985	43.9488	1013.66		3.18			0.00584757	0.00563178	0.00542396	0.00570958	0.00549888	0.00529596	0.00510053	0.00491231	0.00473104	0.00498285	0.00479898	0.00462188	0.00445133	0.00428707
5.0292	16	1.94922e+06	28700.4	40.6624	4.95674	3.2	4673.19	#REF!	10.4992	10	16596.6	23.5139	2.86634	204.411	1.02206	28.9627		30.8094	117.882	3.02802	-87.0727		146.582	94.8792	9.75644	51.7033		1087.55	73.0623	41.0465	1014.48		3.2			0.00554872	0.00534396	0.00514676	0.00541489	0.00521507	0.00502263	0.00483728	0.00465878	0.00448686	0.00472313	0.00454884	0.00438098	0.00421931	0.00406361
5.1816	16.5	1.96376e+06	14540.3	20.6005	2.5112	3.22	4691.86	#REF!	10.5648	10.5	13881.1	19.6666	2.39735	206.809	1.03404	29.9968		30.9738	120.618	2.86364	-89.6444		147.161	97.2915	9.17758	49.8698		1090.26	75.1721	38.3363	1015.08		3.22			0.00526347	0.00506924	0.00488218	0.00513381	0.00494436	0.00476191	0.00458618	0.00441694	0.00425395	0.00447557	0.00431041	0.00415135	0.00399815	0.00385061
5.334	17	1.98139e+06	17627.4	24.9743	3.04437	3.24	4710.28	#REF!	10.6304	10.5	13881.1	19.6666	2.39735	209.206	1.04603	31.0428		31.1293	123.387	2.70807	-92.2579		147.706	99.7362	8.63316	47.9695		1092.79	77.3146	35.8061	1015.47		3.24			0.0049915	0.0048073	0.0046299	0.00486598	0.00468642	0.00451348	0.00434692	0.00418651	0.00403202	0.00423984	0.00408338	0.0039327	0.00378757	0.0036478
5.4864	17.5	2.0316e+06	50210.2	71.1372	8.67162	3.26	4728.45	#REF!	10.6961	10.5	13881.1	19.6666	2.39735	211.604	1.05802	32.1008		31.2765	126.189	2.56088	-94.9128		148.218	102.213	8.12125	46.0043		1095.15	79.4898	33.4446	1015.66		3.26			0.00473241	0.00455778	0.00438959	0.00461102	0.00444087	0.00427699	0.00411916	0.00396716	0.00382076	0.00401559	0.0038674	0.00372469	0.00358724	0.00345486
	18	2.05278e+06	21176.4	30.0025	3.6573	3.28	4746.39	#REF!	10.7617	10.5	13881.1	19.6666	2.39735	214.001	1.07	33.1708		31.4158	129.025	2.42162	-97.6087		148.699	104.723	7.63996	43.9759		1097.35	81.6978	31.2411	1015.65		3.28			0.00448582	0.00432029	0.00416086	0.00436852	0.00420731	0.00405206	0.00390253	0.00375852	0.00361982	0.00380243	0.00366211	0.00352697	0.00339682	0.00327147
						3.3	4764.09	#REF!	10.8273	10.5	13881.1	19.6666	2.39735	216.398	1.08199	34.2528		31.5475	131.893	2.28991	-100.345		149.151	107.265	7.18751	41.886		1099.41	83.9388	29.1852	1015.47		3.3			0.00425131	0.00409443	0.00394333	0.00413803	0.00398533	0.00383827	0.00369663	0.00356021	0.00342883	0.00359996	0.00346711	0.00333917	0.00321595	0.00309727
					333.533	3.32	4781.57	#REF!	10.8929	10.5	13881.1	19.6666	2.39735	218.796	1.09398	35.3468		31.6721	134.795	2.16535	-103.123		149.577	109.84	6.76222	39.7362		1101.33	86.2128	27.2674	1015.11		3.32			0.00402842	0.00387976	0.00373659	0.00391911	0.00377449	0.0036352	0.00350106	0.00337186	0.00324743	0.00340777	0.00328202	0.00316091	0.00304426	0.00293193
						3.34	4798.84	#REF!	10.9585	10.5	13881.1	19.6666	2.39735	221.193	1.10596	36.4527		31.7899	137.73	2.04755	-105.94		149.976	112.448	6.36247	37.5281		1103.11	88.52	25.4784	1014.59		3.34			0.00381671	0.00367587	0.00354022	0.0037113	0.00357435	0.00344245	0.00331542	0.00319307	0.00307524	0.00322546	0.00310643	0.0029918	0.0028814	0.00277507
						3.36	4815.89	#REF!	11.0242	11	11969.3	16.9579	2.06717	223.26	1.1163	37.569		31.9012	140.698	1.93618	-108.797		150.352	115.089	5.98676	35.263		1104.78	90.8604	23.8098	1013.92		3.36			0.00361558	0.00348215	0.00335366	0.00351399	0.00338432	0.00325943	0.00313915	0.00302331	0.00291175	0.00305246	0.00293982	0.00283133	0.00272685	0.00262622
12 foot wall						3.38	4832.74	#REF!	11.0898	11	11969.3	16.9579	2.06717	225.327	1.12664	38.6957		32.0065	143.701	1.83088	-111.694		150.705	117.763	5.63366	32.9423		1106.34	93.234	22.2535	1013.11		3.38			0.0034246	0.00329823	0.00317651	0.00332676	0.003204	0.00308576	0.00297189	0.00286222	0.0027566	0.00288839	0.00278181	0.00267915	0.00258029	0.00248507
4.76	Cost	441.716				3.4	4849.39	#REF!	11.1554	11	11969.3	16.9579	2.06717	227.394	1.13697	39.8327		32.1061	146.737	1.73135	-114.631		151.037	120.47	5.30182	30.5672		1107.79	95.6411	20.8019	1012.15		3.4			0.00324336	0.00312368	0.00300841	0.00314918	0.00303297	0.00292105	0.00281326	0.00270944	0.00260946	0.00273289	0.00263204	0.00253491	0.00244137	0.00235128
4.976	Cost	445.099				3.42	4865.84	#REF!	11.221	11	11969.3	16.9579	2.06717	229.462	1.14731	40.98		32.2001	149.806	1.63726	-117.606		151.349	123.21	4.98997	28.1391		1109.14	98.0817	19.448	1011.06		3.42			0.00307146	0.00295811	0.00284895	0.00298085	0.00287085	0.00276491	0.00266288	0.00256461	0.00246997	0.00258555	0.00249014	0.00239825	0.00230975	0.00222452
5.236	Cost	453.952				3.44	4882.11	#REF!	11.2866	11	11969.3	16.9579	2.06717	231.529	1.15764	42.1376		32.2891	152.91	1.54832	-120.621		151.642	125.983	4.69689	25.6588		1110.41	100.556	18.1852	1009.85		3.44			0.00290847	0.00280114	0.00269777	0.00282133	0.00271722	0.00261695	0.00252038	0.00242737	0.0023378	0.00244603	0.00235576	0.00226883	0.00218511	0.00210447
						3.46	4898.19	#REF!	11.3523	11	11969.3	16.9579	2.06717	233.596	1.16798	43.3056		32.3731	156.047	1.46426	-123.674		151.917	128.79	4.42144	23.1277		1111.59	103.064	17.0072	1008.52		3.46			0.00275399	0.00265236	0.00255449	0.00267024	0.0025717	0.0024768	0.0023854	0.00229738	0.0022126	0.00231394	0.00222855	0.00214631	0.00206711	0.00199083
						3.48	4914.1	#REF!	11.4179	11	11969.3	16.9579	2.06717	235.663	1.17832	44.4839		32.4526	159.219	1.38481	-126.766		152.176	131.63	4.16256	20.5465		1112.68	105.605	15.9082	1007.08		3.48			0.00260763	0.00251141	0.00241873	0.00252716	0.00243391	0.00234409	0.00225759	0.00217428	0.00209404	0.00218893	0.00210816	0.00203036	0.00195544	0.00188328
						3.5	4929.83	#REF!	11.4835	11	11969.3	16.9579	2.06717	237.73	1.18865	45.6726		32.5277	162.424	1.30972	-129.896		152.42	134.503	3.91924	17.9163		1113.71	108.181	14.8829	1005.53		3.5			0.00246901	0.0023779	0.00229015	0.00239172	0.00230346	0.00221846	0.0021366	0.00205775	0.00198182	0.00207066	0.00199425	0.00192066	0.00184978	0.00178152
						3.52	4945.39	#REF!	11.5491	11.5	8175.04	11.5823	1.41188	239.142	1.19571	46.8683		32.5987	165.664	1.23874	-133.065		152.648	137.41	3.69053	15.2379		1114.67	110.79	13.9262	1003.88		3.52			0.00233758	0.00225132	0.00216824	0.00226338	0.00217986	0.00209942	0.00202195	0.00194733	0.00187547	0.00195865	0.00188637	0.00181676	0.00174972	0.00168515
						3.54	4960.79	#REF!	11.6147	11.5	8175.04	11.5823	1.41188	240.554	1.20277	48.071		32.6657	168.938	1.17166	-136.272		152.863	140.351	3.47555	12.5121		1115.56	113.434	13.0335	1002.13		3.54			0.00221302	0.00213136	0.00205271	0.00214182	0.00206278	0.00198666	0.00191335	0.00184274	0.00177474	0.00185262	0.00178425	0.00171841	0.001655	0.00159392
						3.56	4976.02	#REF!	11.6804	11.5	8175.04	11.5823	1.41188	241.966	1.20983	49.2809		32.7291	172.246	1.10826	-139.517		153.065	143.326	3.27348	9.7397		1116.39	116.111	12.2003	1000.28		3.56			0.00209502	0.00201771	0.00194325	0.00202671	0.00195192	0.00187989	0.00181052	0.00174371	0.00167936	0.00175227	0.00168761	0.00162533	0.00156535	0.00150759
						3.58	4991.1	#REF!	11.746	11.5	8175.04	11.5823	1.41188	243.378	1.21689	50.4978		32.7891	175.588	1.04835	-142.799		153.255	146.334	3.08353	6.92134		1117.17	118.823	11.4228	998.347		3.58			0.00198326	0.00191007	0.00183959	0.00191775	0.00184699	0.00177883	0.00171319	0.00164997	0.00158908	0.00165733	0.00159617	0.00153727	0.00148054	0.00142591
						3.6	5006.03	#REF!	11.8116	11.5	8175.04	11.5823	1.41188	244.79	1.22395	51.7217		32.8457	178.965	0.991727	-146.12		153.434	149.376	2.90495	4.05771		1117.9	121.569	10.6969	996.327		3.6			0.00187744	0.00180816	0.00174143	0.00181464	0.00174768	0.00168319	0.00162107	0.00156125	0.00150364	0.00156753	0.00150969	0.00145398	0.00140032	0.00134865
						3.62	5020.8	#REF!	11.8772	11.5	8175.04	11.5823	1.41188	246.202	1.23101	52.9527		32.8992	182.377	0.938213	-149.478		153.602	152.452	2.73706	1.14943		1118.57	124.349	10.0193	994.224		3.62			0.00177727	0.00171169	0.00164852	0.00171709	0.00165372	0.0015927	0.00153393	0.00147732	0.0014228	0.00148262	0.00142791	0.00137522	0.00132447	0.00127559
						3.64	5035.43	#REF!	11.9428	11.5	8175.04	11.5823	1.41188	247.613	1.23807	54.1908		32.9498	185.823	0.887634	-152.874		153.76	155.563	2.5792	-1.80293		1119.21	127.164	9.3866	992.042		3.64			0.00168247	0.00162038	0.00156059	0.00162481	0.00156485	0.0015071	0.00145149	0.00139793	0.00134634	0.00140234	0.00135059	0.00130075	0.00125275	0.00120652
						3.66	5049.92	#REF!	12.0085	12	7496.8	10.6214	1.29475	248.908	1.24454	55.4353		32.9976	189.304	0.83983	-156.307		153.908	158.707	2.43077	-4.79883		1119.8	130.013	8.79572	989.784		3.66			0.00159275	0.00153398	0.00147737	0.00153752	0.00148078	0.00142614	0.00137351	0.00132282	0.00127401	0.00132644	0.00127749	0.00123035	0.00118494	0.00114122
						3.68	5064.27	#REF!	12.0741	12	7496.8	10.6214	1.29475	250.203	1.25101	56.6863		33.0428	192.82	0.794644	-159.777		154.048	161.885	2.29117	-7.83777		1120.35	132.897	8.24382	987.452		3.68			0.00150786	0.00145221	0.00139862	0.00145496	0.00140127	0.00134956	0.00129976	0.0012518	0.0012056	0.00125469	0.00120839	0.00116379	0.00112085	0.00107949
						3.7	5078.48	#REF!	12.1397	12	7496.8	10.6214	1.29475	251.498	1.25749	57.9438		33.0855	196.371	0.751932	-163.285		154.179	165.098	2.15987	-10.9193		1120.86	135.816	7.72824	985.048		3.7			0.00142754	0.00137486	0.00132412	0.00137689	0.00132608	0.00127715	0.00123002	0.00118463	0.00114091	0.00118687	0.00114307	0.00110089	0.00106027	0.00102114
						3.72	5092.56	#REF!	12.2053	12	7496.8	10.6214	1.29475	252.792	1.26396	59.2078		33.1258	199.956	0.711556	-166.83		154.303	168.345	2.03637	-14.0429		1121.35	138.77	7.2465	982.577		3.72			0.00135156	0.00130168	0.00125365	0.00130308	0.00125499	0.00120868	0.00116408	0.00112112	0.00107975	0.00112278	0.00108135	0.00104144	0.00100301	0.000966
						3.74	5106.51	#REF!	12.2709	12	7496.8	10.6214	1.29475	254.087	1.27044	60.4782		33.164	203.577	0.673385	-170.413		154.419	171.627	1.92019	-17.2083		1121.8	141.758	6.79629	980.039		3.74			0.00127969	0.00123247	0.00118699	0.00123329	0.00118778	0.00114395	0.00110174	0.00106108	0.00102193	0.00106222	0.00102302	0.00098527	0.000948911	0.000913895
						3.76	5120.34	#REF!	12.3366	12	7496.8	10.6214	1.29475	255.382	1.27691	61.7551		33.2001	207.232	0.637296	-174.032		154.528	174.943	1.81087	-20.4151		1122.22	144.781	6.37546	977.436		3.76			0.00121173	0.00116701	0.00112395	0.00116732	0.00112425	0.00108276	0.00104281	0.00100432	0.000967262	0.00100499	0.000967909	0.000932191	0.000897791	0.000864661
						3.78	5134.03	#REF!	12.4022	12	7496.8	10.6214	1.29475	256.677	1.28338	63.0385		33.2342	210.923	0.603172	-177.689		154.631	178.294	1.70801	-23.6629		1122.61	147.839	5.98201	974.771		3.78			0.00114745	0.0011051	0.00106432	0.00110497	0.00106419	0.00102492	0.000987098	0.000950672	0.000915591	0.000950928	0.000915837	0.000882041	0.000849492	0.000818144
						3.8	5147.61	#REF!	12.4678	12	7496.8	10.6214	1.29475	257.971	1.28986	64.3284		33.2665	214.649	0.570903	-181.383		154.728	181.679	1.61119	-26.9513		1122.98	150.933	5.61408	972.046		3.8			0.00108666	0.00104656	0.00100794	0.00104602	0.00100742	0.000970247	0.000934443	0.00089996	0.00086675	0.000899847	0.000866641	0.00083466	0.000803859	0.000774195
						3.82	5161.07	#REF!	12.5334	12.5	6859.81	9.7189	1.18473	259.156	1.29578	65.6242		33.297	218.41	0.540386	-185.113		154.819	185.099	1.52006	-30.2802		1123.32	154.061	5.26995	969.262		3.82			0.00102918	0.000991198	0.000954621	0.000990303	0.000953758	0.000918563	0.000884666	0.00085202	0.000820579	0.00085158	0.000820155	0.00078989	0.000760741	0.000732669
						3.84	5174.41	#REF!	12.599	12.5	6859.81	9.7189	1.18473	260.341	1.3017	66.9259		33.3259	222.207	0.511523	-188.881		154.905	188.554	1.43427	-33.6492		1123.64	157.225	4.94801	966.42		3.84			0.000974811	0.000938838	0.000904193	0.000937631	0.00090303	0.000869707	0.000837613	0.000806703	0.000776934	0.000805974	0.000776232	0.000747588	0.000720001	0.000693431
						3.86	5187.63	#REF!	12.6647	12.5	6859.81	9.7189	1.18473	261.526	1.30763	68.2335		33.3532	226.039	0.484221	-192.686		154.985	192.043	1.35349	-37.058		1123.95	160.424	4.64675	963.522		3.86			0.000923397	0.000889322	0.000856504	0.000887841	0.000855078	0.000823524	0.000793135	0.000763867	0.000735678	0.000762884	0.000734732	0.000707619	0.000681507	0.000656358
						3.88	5200.75	#REF!	12.7303	12.5	6859.81	9.7189	1.18473	262.71	1.31355	69.547		33.379	229.907	0.458393	-196.528		155.061	195.568	1.27742	-40.5065		1124.23	163.659	4.36479	960.569		3.88			0.000874777	0.000842496	0.000811406	0.000840778	0.000809751	0.00077987	0.000751091	0.000723375	0.000696681	0.00072217	0.000695521	0.000669855	0.000645136	0.000621329
						3.9	5213.75	#REF!	12.7959	12.5	6859.81	9.7189	1.18473	263.895	1.31948	70.8665		33.4034	233.81	0.433957	-200.406		155.133	199.128	1.20578	-43.9944		1124.49	166.929	4.10084	957.563		3.9			0.000828799	0.000798214	0.000768759	0.00079629	0.000766906	0.000738605	0.000711349	0.000685099	0.000659818	0.000683702	0.000658472	0.000634173	0.000610771	0.000588232
						3.92	5226.65	#REF!	12.8615	12.5	6859.81	9.7189	1.18473	265.08	1.3254	72.1919		33.4266	237.748	0.410834	-204.322		155.201	202.722	1.13828	-47.5215		1124.74	170.234	3.85367	954.505		3.92			0.000785318	0.000756338	0.000728428	0.000754237	0.000726405	0.000699599	0.000673782	0.000648919	0.000624972	0.000647354	0.000623466	0.000600459	0.000578301	0.00055696
						3.94	5239.44	#REF!	12.9271	12.5	6859.81	9.7189	1.18473	266.265	1.33132	73.5232		33.4485	241.723	0.388952	-208.274		155.264	206.352	1.07469	-51.0877		1124.97	173.575	3.62218	951.395		3.94			0.000744198	0.000716736	0.000690287	0.000714485	0.000688119	0.000662726	0.00063827	0.000614717	0.000592033	0.00061301	0.000590388	0.000568602	0.000547619	0.000527411
						3.96	5252.13	#REF!	12.9928	12.5	6859.81	9.7189	1.18473	267.449	1.33725	74.8605		33.4692	245.733	0.368242	-212.264		155.324	210.017	1.01477	-54.6927		1125.19	176.952	3.40532	948.235		3.96			0.000705311	0.000679283	0.000654217	0.000676906	0.000651927	0.000627869	0.0006047	0.000582385	0.000560894	0.000580556	0.000559133	0.0005385	0.000518628	0.000499489
						3.98	5264.71	#REF!	13.0584	13	6549.54	9.27931	1.13115	268.58	1.3429	76.2034		33.4888	249.779	0.348638	-216.29		155.381	213.717	0.958286	-58.3364		1125.39	180.365	3.20211	945.026		3.98			0.00066853	0.00064386	0.000620101	0.000641377	0.000617709	0.000594915	0.000572961	0.000551818	0.000531455	0.000549887	0.000529595	0.000510052	0.00049123	0.000473102
						4	5277.2	#REF!	13.124	13	6549.54	9.27931	1.13115	269.712	1.34856	77.5519		33.5073	253.861	0.330078	-220.353		155.434	217.453	0.905043	-62.0187		1125.58	183.813	3.01165	941.768		4			0.000633741	0.000610355	0.000587832	0.000607787	0.000585358	0.000563757	0.000542954	0.000522917	0.000503621	0.000520901	0.000501679	0.000483166	0.000465336	0.000448164
						4.02	5289.59	#REF!	13.1896	13	6549.54	9.27931	1.13115	270.843	1.35421	78.9062		33.5249	257.979	0.312506	-224.454		155.484	221.224	0.854844	-65.7395		1125.76	187.298	2.8331	938.462		4.02			0.000600834	0.000578662	0.000557309	0.000576026	0.000554769	0.000534297	0.000514581	0.000495592	0.000477303	0.000493506	0.000475295	0.000457755	0.000440863	0.000424595
						4.04	5301.88	#REF!	13.2552	13	6549.54	9.27931	1.13115	271.974	1.35987	80.266		33.5415	262.132	0.295865	-228.591		155.531	225.03	0.807505	-69.4986		1125.93	190.818	2.66567	935.109		4.04			0.000569706	0.000548683	0.000528435	0.000545993	0.000525845	0.00050644	0.000487752	0.000469753	0.000452418	0.000467612	0.000450356	0.000433737	0.000417732	0.000402317
						4.06	5314.08	#REF!	13.3209	13	6549.54	9.27931	1.13115	273.105	1.36553	81.6316		33.5573	266.322	0.280104	-232.765		155.576	228.872	0.762857	-73.2959		1126.08	194.375	2.50864	931.709		4.06			0.000540258	0.000520322	0.000501121	0.000517593	0.000498493	0.000480098	0.000462381	0.000445319	0.000428885	0.000443136	0.000426783	0.000411034	0.000395866	0.000381258
						4.08	5326.19	#REF!	13.3865	13	6549.54	9.27931	1.13115	274.236	1.37118	83.0027		33.5722	270.549	0.265175	-236.976		155.618	232.75	0.720737	-77.1314		1126.23	197.967	2.36131	928.264		4.08			0.000512398	0.00049349	0.000475279	0.000490735	0.000472626	0.000455185	0.000438388	0.000422211	0.000406631	0.000419997	0.000404498	0.000389572	0.000375196	0.00036135
						4.1	5338.21	#REF!	13.4521	13	6549.54	9.27931	1.13115	275.367	1.37684	84.3796		33.5864	274.811	0.251032	-241.225		155.658	236.663	0.680995	-81.0049		1126.37	201.596	2.22306	924.774		4.1			0.000486039	0.000468103	0.000450829	0.000465333	0.000448162	0.000431624	0.000415696	0.000400356	0.000385582	0.000398121	0.00038343	0.000369281	0.000355653	0.000342529
						4.12	5350.13	#REF!	13.5177	13.5	4197.54	5.94702	0.724942	276.092	1.38046	85.76		33.5998	279.11	0.237632	-245.51		155.695	240.612	0.643492	-84.9163		1126.5	205.261	2.0933	921.238		4.12			0.000461086	0.000444071	0.000427684	0.000441296	0.000425012	0.000409328	0.000394223	0.000379675	0.000365665	0.000377429	0.000363501	0.000350087	0.000337168	0.000324726
						4.14	5361.98	#REF!	13.5833	13.5	4197.54	5.94702	0.724942	276.817	1.38409	87.1441		33.6125	283.444	0.224934	-249.832		155.731	244.597	0.608094	-88.8657		1126.62	208.963	1.97148	917.658		4.14			0.000437463	0.00042132	0.000405773	0.000418549	0.000403104	0.000388229	0.000373902	0.000360105	0.000346816	0.000357855	0.000344649	0.000331931	0.000319682	0.000307885
						4.16	5373.73	#REF!	13.649	13.5	4197.54	5.94702	0.724942	277.542	1.38771	88.5318		33.6245	287.816	0.212899	-254.191		155.764	248.617	0.574679	-92.8529		1126.74	212.701	1.85708	914.035		4.16			0.000415099	0.000399781	0.000385029	0.000397022	0.000382371	0.000368261	0.000354671	0.000341583	0.000328978	0.000339337	0.000326815	0.000314755	0.00030314	0.000291953
						4.18	5385.4	#REF!	13.7146	13.5	4197.54	5.94702	0.724942	278.267	1.39134	89.9232		33.6359	292.224	0.201493	-258.588		155.796	252.674	0.543129	-96.878		1126.84	216.475	1.74964	910.368		4.18			0.000393925	0.000379388	0.000365388	0.000376648	0.000362749	0.000349363	0.000336471	0.000324054	0.000312096	0.000321818	0.000309942	0.000298505	0.000287489	0.00027688
						4.2	5396.99	#REF!	13.7802	13.5	4197.54	5.94702	0.724942	278.992	1.39496	91.3181		33.6467	296.668	0.190679	-263.021		155.826	256.766	0.513336	-100.941		1126.94	220.286	1.6487	906.658		4.2			0.000373876	0.00036008	0.000346792	0.000357364	0.000344176	0.000331476	0.000319244	0.000307463	0.000296117	0.000305242	0.000293978	0.00028313	0.000272682	0.000262619
						4.22	5408.49	#REF!	13.8458	13.5	4197.54	5.94702	0.724942	279.717	1.39859	92.7167		33.657	301.149	0.180427	-267.492		155.854	260.895	0.485197	-105.041		1127.04	224.134	1.55386	902.905		4.22			0.000354892	0.000341796	0.000329183	0.00033911	0.000326596	0.000314544	0.000302937	0.000291758	0.000280992	0.000289557	0.000278872	0.000268581	0.00025867	0.000249125
						4.24	5419.92	#REF!	13.9114	13.5	4197.54	5.94702	0.724942	280.442	1.40221	94.1189		33.6667	305.667	0.170705	-272		155.88	265.06	0.458614	-109.179		1127.13	228.018	1.46472	899.11		4.24			0.000336914	0.000324482	0.000312508	0.00032183	0.000309954	0.000298516	0.0002875	0.000276891	0.000266673	0.000274715	0.000264578	0.000254814	0.000245411	0.000236355
						4.26	5431.27	#REF!	13.9771	13.5	4197.54	5.94702	0.724942	281.167	1.40583	95.5248		33.6759	310.221	0.161486	-276.545		155.905	269.261	0.433499	-113.355		1127.21	231.939	1.38091	895.273		4.26			0.000319888	0.000308084	0.000296715	0.000305471	0.000294199	0.000283342	0.000272886	0.000262816	0.000253118	0.000260669	0.00025105	0.000241785	0.000232863	0.00022427
						4.28	5442.54	#REF!	14.0427	14	6501.31	9.21098	1.12282	282.29	1.41145	96.9362		33.6847	314.812	0.152741	-281.128		155.929	273.498	0.409764	-117.569		1127.29	235.897	1.30211	891.393		4.28			0.000303768	0.000292559	0.000281763	0.000289988	0.000279287	0.000268981	0.000259055	0.000249495	0.000240288	0.000247379	0.000238251	0.000229459	0.000220991	0.000212836
						4.3	5453.73	#REF!	14.1083	14	6501.31	9.21098	1.12282	283.413	1.41706	98.3533		33.693	319.44	0.144445	-285.747		155.952	277.771	0.38733	-121.82		1127.36	239.892	1.22799	887.473		4.3			0.000288504	0.000277858	0.000267605	0.000275332	0.000265172	0.000255387	0.000245962	0.000236886	0.000228144	0.000234804	0.00022614	0.000217795	0.000209758	0.000202017
						4.32	5464.85	#REF!	14.1739	14	6501.31	9.21098	1.12282	284.535	1.42268	99.7759		33.7008	324.105	0.136573	-290.404		155.973	282.081	0.366122	-126.108		1127.43	243.924	1.15826	883.511		4.32			0.000274049	0.000263936	0.000254197	0.000261458	0.000251809	0.000242517	0.000233568	0.000224949	0.000216648	0.000222904	0.000214678	0.000206756	0.000199126	0.000191778
						4.34	5475.89	#REF!	14.2395	14	6501.31	9.21098	1.12282	285.658	1.42829	101.204		33.7083	328.807	0.129103	-295.099		155.993	286.427	0.346067	-130.435		1127.5	247.993	1.09264	879.507		4.34			0.000260358	0.000250751	0.000241497	0.000248321	0.000239157	0.000230332	0.000221832	0.000213646	0.000205762	0.00021164	0.00020383	0.000196308	0.000189064	0.000182087
						4.36	5486.86	#REF!	14.3052	14	6501.31	9.21098	1.12282	286.781	1.4339	102.638		33.7154	333.546	0.122013	-299.83		156.012	290.81	0.3271	-134.798		1127.56	252.099	1.03088	875.463		4.36			0.000247389	0.00023826	0.000229468	0.000235881	0.000227177	0.000218793	0.00021072	0.000202944	0.000195455	0.000200977	0.000193561	0.000186418	0.000179539	0.000172913
						4.38	5497.77	#REF!	14.3708	14	6501.31	9.21098	1.12282	287.904	1.43952	104.078		33.7221	338.322	0.115282	-304.6		156.03	295.23	0.309158	-139.2		1127.62	256.242	0.972728	871.378		4.38			0.000235103	0.000226427	0.000218071	0.0002241	0.00021583	0.000207865	0.000200195	0.000192807	0.000185692	0.000190882	0.000183838	0.000177054	0.000170521	0.000164228
						4.4	5508.6	#REF!	14.4364	14	6501.31	9.21098	1.12282	289.027	1.44513	105.523		33.7285	343.135	0.108891	-309.406		156.047	299.685	0.292182	-143.639		1127.67	260.422	0.917965	867.252		4.4			0.000223461	0.000215215	0.000207273	0.00021294	0.000205082	0.000197514	0.000190226	0.000183206	0.000176445	0.000181323	0.000174632	0.000168188	0.000161981	0.000156004
						4.42	5519.36	#REF!	14.502	14.5	6231.21	8.8283	1.07617	290.103	1.45051	106.973		33.7346	347.985	0.102823	-314.251		156.063	304.178	0.276118	-148.115		1127.73	264.64	0.86638	863.086		4.42			0.000212428	0.000204589	0.000197039	0.000202368	0.0001949	0.000187708	0.000180781	0.00017411	0.000167685	0.00017227	0.000165913	0.000159791	0.000153894	0.000148215
						4.44	5530.05	#REF!	14.5676	14.5	6231.21	8.8283	1.07617	291.179	1.45589	108.429		33.7403	352.873	0.0970589	-319.132		156.078	308.707	0.260912	-152.629		1127.77	268.895	0.817778	858.88		4.44			0.000201971	0.000194517	0.000187339	0.000192351	0.000185253	0.000178416	0.000171832	0.000165492	0.000159385	0.000163695	0.000157655	0.000151837	0.000146234	0.000140837
						4.46	5540.68	#REF!	14.6333	14.5	6231.21	8.8283	1.07617	292.255	1.46128	109.89		33.7458	357.797	0.0915838	-324.052		156.092	313.274	0.246517	-157.181		1127.82	273.188	0.771975	854.633		4.46			0.000192058	0.00018497	0.000178145	0.000182858	0.00017611	0.000169611	0.000163352	0.000157324	0.000151519	0.000155572	0.000149831	0.000144302	0.000138977	0.000133848
						4.48	5551.24	#REF!	14.6989	14.5	6231.21	8.8283	1.07617	293.331	1.46666	111.357		33.751	362.76	0.0863819	-329.009		156.106	317.877	0.232887	-161.771		1127.86	277.518	0.728798	850.346		4.48			0.000182659	0.000175919	0.000169427	0.000173861	0.000167445	0.000161266	0.000155315	0.000149583	0.000144063	0.000147875	0.000142418	0.000137163	0.000132101	0.000127226
						4.5	5561.73	#REF!	14.7645	14.5	6231.21	8.8283	1.07617	294.407	1.47204	112.829		33.756	367.759	0.081439	-334.003		156.119	322.517	0.219978	-166.398		1127.9	281.886	0.688088	846.019		4.5			0.000173748	0.000167336	0.000161161	0.000165332	0.000159231	0.000153355	0.000147696	0.000142246	0.000136997	0.000140581	0.000135394	0.000130397	0.000125585	0.000120951
						4.52	5572.16	#REF!	14.8301	14.5	6231.21	8.8283	1.07617	295.484	1.47742	114.307		33.7607	372.796	0.0767413	-339.036		156.131	327.193	0.207749	-171.062		1127.94	286.291	0.649695	841.652		4.52			0.000165297	0.000159197	0.000153322	0.000157246	0.000151444	0.000145855	0.000140473	0.000135289	0.000130297	0.000133669	0.000128736	0.000123986	0.00011941	0.000115004
						4.54	5582.53	#REF!	14.8957	14.5	6231.21	8.8283	1.07617	296.56	1.4828	115.789		33.7651	377.871	0.0722758	-344.106		156.143	331.907	0.196164	-175.765		1127.98	290.734	0.613478	837.246		4.54			0.000157281	0.000151477	0.000145887	0.00014958	0.00014406	0.000138744	0.000133624	0.000128693	0.000123944	0.000127116	0.000122426	0.000117908	0.000113557	0.000109366
						4.56	5592.83	#REF!	14.9614	14.5	6231.21	8.8283	1.07617	297.636	1.48818	117.278		33.7694	382.983	0.0680305	-349.214		156.154	336.658	0.185185	-180.505		1128.01	295.214	0.579306	832.799		4.56			0.000149677	0.000144153	0.000138834	0.000142309	0.000137058	0.000132	0.000127129	0.000122438	0.00011792	0.000120904	0.000116443	0.000112146	0.000108007	0.000104022
						4.58	5603.08	#REF!	15.027	15	4052.08	5.74093	0.699819	298.336	1.49168	118.769		33.7734	388.133	0.0639939	-354.36		156.164	341.447	0.174779	-185.283		1128.05	299.733	0.547056	828.313		4.58			0.00014246	0.000137203	0.00013214	0.000135411	0.000130414	0.000125602	0.000120967	0.000116503	0.000112204	0.000115013	0.000110768	0.000106681	0.000102744	9.89527e-05
						4.6	5613.26	#REF!	15.0926	15	4052.08	5.74093	0.699819	299.036	1.49518	120.264		33.7772	393.321	0.0601551	-359.544		156.174	346.272	0.164915	-190.098		1128.08	293.613	0.516613	834.464		4.6			0.00013561	0.000130606	0.000125787	0.000128866	0.000124111	0.000119531	0.00011512	0.000110872	0.00010678	0.000109424	0.000105386	0.000101497	9.77514e-05	9.41442e-05
						4.62	5623.38	#REF!	15.1582	15	4052.08	5.74093	0.699819	299.735	1.49868	121.763		33.7809	398.546	0.056504	-364.766		156.183	351.135	0.155563	-194.951		1128.1	298.046	0.487871	830.059		4.62			0.000129108	0.000124344	0.000119755	0.000122654	0.000118128	0.000113769	0.000109571	0.000105527	0.000101633	0.000104121	0.000100279	9.65786e-05	9.30147e-05	8.95823e-05
						4.64	5633.45	#REF!	15.2238	15	4052.08	5.74093	0.699819	300.435	1.50218	123.265		33.7844	403.81	0.0530307	-370.025		156.192	356.035	0.146694	-199.842		1128.13	302.516	0.460727	825.616		4.64			0.000122935	0.000118398	0.000114029	0.000116759	0.00011245	0.000108301	0.000104304	0.000100455	9.67482e-05	9.90904e-05	9.54337e-05	9.19121e-05	8.85203e-05	8.52538e-05
						4.66	5643.45	#REF!	15.2895	15	4052.08	5.74093	0.699819	301.135	1.50568	124.771		33.7877	409.111	0.0497262	-375.323		156.201	360.972	0.138282	-204.771		1128.16	307.022	0.435088	821.136		4.66			0.000117073	0.000112753	0.000108592	0.000111163	0.000107061	0.00010311	9.9305e-05	9.56404e-05	9.21111e-05	9.43162e-05	9.08357e-05	8.74837e-05	8.42554e-05	8.11462e-05
						4.68	5653.4	#REF!	15.3551	15	4052.08	5.74093	0.699819	301.835	1.50917	126.28		33.7908	414.45	0.0465818	-380.659		156.209	365.947	0.130302	-209.738		1128.18	311.565	0.410864	816.616		4.68			0.000111507	0.000107392	0.000103429	0.00010585	0.000101944	9.8182e-05	9.45589e-05	9.10695e-05	8.77088e-05	8.9785e-05	8.64718e-05	8.32808e-05	8.02076e-05	7.72478e-05
						4.7	5663.3	#REF!	15.4207	15	4052.08	5.74093	0.699819	302.535	1.51267	127.793		33.7938	419.827	0.0435893	-386.033		156.216	370.959	0.12273	-214.743		1128.2	316.146	0.387974	812.059		4.7			0.00010622	0.0001023	9.85253e-05	0.000100806	9.70856e-05	9.3503e-05	9.00526e-05	8.67294e-05	8.3529e-05	8.54841e-05	8.23296e-05	7.92914e-05	7.63654e-05	7.35474e-05
						4.72	5673.13	#REF!	15.4863	15	4052.08	5.74093	0.699819	303.235	1.51617	129.309		33.7967	425.242	0.0407409	-391.445		156.223	376.009	0.115545	-219.786		1128.23	320.763	0.366338	807.464		4.72			0.000101198	9.7464e-05	9.38674e-05	9.60153e-05	9.24722e-05	8.90598e-05	8.57733e-05	8.26081e-05	7.95597e-05	8.1401e-05	7.83972e-05	7.55042e-05	7.27179e-05	7.00345e-05
						4.74	5682.92	#REF!	15.5519	15.5	6168.6	8.7396	1.06536	304.3	1.5215	130.83		33.7994	430.695	0.0380292	-396.896		156.23	381.096	0.108725	-224.866		1128.25	325.417	0.345883	802.83		4.74			9.64291e-05	9.28707e-05	8.94436e-05	9.14672e-05	8.80919e-05	8.48411e-05	8.17103e-05	7.86951e-05	7.57911e-05	7.75254e-05	7.46646e-05	7.19093e-05	6.92557e-05	6.67001e-05
						4.76	5692.64	#REF!	15.6176	15.5	6168.6	8.7396	1.06536	305.365	1.52683	132.357		33.802	436.186	0.0354473	-402.385		156.237	386.221	0.102251	-229.985		1128.27	330.108	0.326541	798.158		4.76			9.18989e-05	8.85076e-05	8.52415e-05	8.71483e-05	8.39323e-05	8.08351e-05	7.78521e-05	7.49792e-05	7.22123e-05	7.38461e-05	7.1121e-05	6.84965e-05	6.59689e-05	6.35345e-05
						4.78	5702.32	#REF!	15.6832	15.5	6168.6	8.7396	1.06536	306.431	1.53215	133.889		33.8044	441.716	0.0329885	-407.912		156.243	391.384	0.0961035	-235.141		1128.28	334.836	0.308246	793.448		4.78			8.7595e-05	8.43626e-05	8.12495e-05	8.30463e-05	7.99817e-05	7.70302e-05	7.41877e-05	7.145e-05	6.88134e-05	7.03526e-05	6.77565e-05	6.52561e-05	6.28481e-05	6.05289e-05
						4.8	5711.94	#REF!	15.7488	15.5	6168.6	8.7396	1.06536	307.496	1.53748	135.427		33.8068	447.284	0.0306466	-413.477		156.249	396.585	0.0902653	-240.336		1128.3	339.602	0.290939	788.7		4.8			8.35057e-05	8.04242e-05	7.74564e-05	7.91498e-05	7.6229e-05	7.3416e-05	7.07068e-05	6.80976e-05	6.55847e-05	6.70351e-05	6.45613e-05	6.21789e-05	5.98844e-05	5.76745e-05
						4.82	5721.51	#REF!	15.8144	15.5	6168.6	8.7396	1.06536	308.561	1.54281	136.97		33.809	452.89	0.0284157	-419.081		156.254	401.823	0.0847198	-245.569		1128.32	344.404	0.274562	783.914		4.82			7.96195e-05	7.66814e-05	7.38517e-05	7.54479e-05	7.26637e-05	6.99823e-05	6.73998e-05	6.49127e-05	6.25173e-05	6.38841e-05	6.15266e-05	5.92562e-05	5.70695e-05	5.49635e-05
						4.84	5731.03	#REF!	15.88	15.5	6168.6	8.7396	1.06536	309.627	1.54813	138.518		33.8111	458.534	0.0262901	-424.723		156.259	407.1	0.0794512	-250.84		1128.33	349.244	0.259062	779.09		4.84			7.59259e-05	7.31241e-05	7.04257e-05	7.19304e-05	6.9276e-05	6.67196e-05	6.42575e-05	6.18863e-05	5.96026e-05	6.08908e-05	5.86438e-05	5.64797e-05	5.43955e-05	5.23882e-05
						4.86	5740.5	#REF!	15.9457	15.5	6168.6	8.7396	1.06536	310.692	1.55346	140.071		33.8131	464.217	0.0242646	-430.404		156.264	412.414	0.0744449	-256.149		1128.35	354.121	0.244388	774.227		4.86			7.24148e-05	6.97425e-05	6.71689e-05	6.85875e-05	6.60565e-05	6.36189e-05	6.12712e-05	5.90102e-05	5.68326e-05	5.80469e-05	5.59049e-05	5.38419e-05	5.1855e-05	4.99414e-05
						4.88	5749.92	#REF!	16.0113	16	3587.55	5.0828	0.619593	311.312	1.55656	141.628		33.8151	469.939	0.0223341	-436.124		156.269	417.766	0.0696869	-261.497		1128.36	359.036	0.230495	769.326		4.88			6.90754e-05	6.65264e-05	6.40715e-05	6.54091e-05	6.29954e-05	6.06707e-05	5.84319e-05	5.62756e-05	5.41989e-05	5.53436e-05	5.33014e-05	5.13344e-05	4.94401e-05	4.76157e-05
						4.9	5759.29	#REF!	16.0769	16	3587.55	5.0828	0.619593	311.931	1.55966	143.188		33.8169	475.699	0.020494	-441.882		156.274	423.156	0.0651642	-266.883		1128.38	363.988	0.217336	764.388		4.9			6.58992e-05	6.34674e-05	6.11253e-05	6.23867e-05	6.00845e-05	5.78672e-05	5.57318e-05	5.36752e-05	5.16945e-05	5.27737e-05	5.08263e-05	4.89507e-05	4.71443e-05	4.54046e-05
						4.92	5768.61	#REF!	16.1425	16	3587.55	5.0828	0.619593	312.551	1.56275	144.75		33.8187	481.497	0.0187398	-447.679		156.278	428.585	0.0608645	-272.307		1128.39	368.977	0.204872	759.411		4.92			6.28776e-05	6.05573e-05	5.83226e-05	5.95122e-05	5.73161e-05	5.5201e-05	5.3164e-05	5.12021e-05	4.93127e-05	5.03303e-05	4.8473e-05	4.66842e-05	4.49615e-05	4.33023e-05
						4.94	5777.88	#REF!	16.2081	16	3587.55	5.0828	0.619593	313.17	1.56585	146.316		33.8203	487.334	0.0170671	-453.514		156.282	434.051	0.056776	-277.769		1128.4	374.004	0.193064	754.395		4.94			6.00028e-05	5.77885e-05	5.5656e-05	5.6778e-05	5.46828e-05	5.26649e-05	5.07215e-05	4.88497e-05	4.70471e-05	4.80067e-05	4.62351e-05	4.4529e-05	4.28858e-05	4.13032e-05
						4.96	5787.1	#REF!	16.2738	16	3587.55	5.0828	0.619593	313.79	1.56895	147.885		33.8219	493.21	0.0154721	-459.388		156.286	439.556	0.0528877	-283.27		1128.41	379.069	0.181873	749.342		4.96			5.72672e-05	5.5154e-05	5.31187e-05	5.4177e-05	5.21778e-05	5.02523e-05	4.83979e-05	4.66119e-05	4.48919e-05	4.57968e-05	4.41068e-05	4.24792e-05	4.09117e-05	3.94019e-05
						4.98	5796.28	#REF!	16.3394	16	3587.55	5.0828	0.619593	314.41	1.57205	149.457		33.8235	499.125	0.0139508	-465.301		156.29	445.099	0.0491892	-288.809		1128.42	384.171	0.171267	744.25		4.98			5.46639e-05	5.26467e-05	5.0704e-05	5.17023e-05	4.97944e-05	4.79569e-05	4.61872e-05	4.44828e-05	4.28413e-05	4.36949e-05	4.20824e-05	4.05295e-05	3.90339e-05	3.75935e-05
						5	5805.41	#REF!	16.405	16	3587.55	5.0828	0.619593	315.029	1.57515	151.032		33.8249	505.078	0.0124997	-471.253		156.293	450.68	0.0456707	-294.387		1128.43	389.311	0.161212	739.121		5			5.21861e-05	5.02603e-05	4.84056e-05	4.93475e-05	4.75265e-05	4.57727e-05	4.40836e-05	4.24568e-05	4.08901e-05	4.16952e-05	4.01566e-05	3.86747e-05	3.72476e-05	3.58731e-05
						5.02	5814.5	#REF!	16.4706	16	3587.55	5.0828	0.619593	315.649	1.57824	152.611		33.8263	511.07	0.0111153	-477.244		156.297	456.3	0.0423228	-300.003		1128.44	394.489	0.151678	733.952		5.02			4.98274e-05	4.79887e-05	4.62178e-05	4.71065e-05	4.53682e-05	4.3694e-05	4.20817e-05	4.05288e-05	3.90332e-05	3.97927e-05	3.83243e-05	3.691e-05	3.5548e-05	3.42362e-05
						5.04	5823.54	#REF!	16.5362	16.5	1817.54	2.57506	0.3139	315.963	1.57981	154.19		33.8276	517.101	0.00979432	-483.274		156.3	461.958	0.0391367	-305.658		1128.45	399.704	0.142637	728.746		5.04			4.75814e-05	4.58255e-05	4.41345e-05	4.49731e-05	4.33135e-05	4.17151e-05	4.01758e-05	3.86932e-05	3.72654e-05	3.79819e-05	3.65803e-05	3.52304e-05	3.39304e-05	3.26783e-05
						5.06	5832.54	#REF!	16.6019	16.5	1817.54	2.57506	0.3139	316.277	1.58138	155.772		33.8289	523.171	0.00853376	-489.342		156.303	467.655	0.0361043	-311.352		1128.46	404.958	0.13406	723.501		5.06			4.54423e-05	4.37654e-05	4.21504e-05	4.29418e-05	4.13571e-05	3.9831e-05	3.83611e-05	3.69455e-05	3.55822e-05	3.62583e-05	3.49203e-05	3.36317e-05	3.23906e-05	3.11953e-05
						5.08	5841.49	#REF!	16.6675	16.5	1817.54	2.57506	0.3139	316.59	1.58295	157.355		33.8301	529.28	0.00733067	-495.45		156.306	473.39	0.0332175	-317.084		1128.47	410.249	0.125924	718.218		5.08			4.3405e-05	4.18032e-05	4.02606e-05	4.10075e-05	3.94942e-05	3.80368e-05	3.66332e-05	3.52814e-05	3.39794e-05	3.46174e-05	3.33399e-05	3.21096e-05	3.09247e-05	2.97835e-05
						5.1	5850.4	#REF!	16.7331	16.5	1817.54	2.57506	0.3139	316.904	1.58452	158.939		33.8312	535.428	0.00618228	-501.597		156.308	479.163	0.0304691	-322.855		1128.47	415.579	0.118204	712.896		5.1			4.14642e-05	3.99341e-05	3.84604e-05	3.91654e-05	3.77201e-05	3.63282e-05	3.49876e-05	3.36965e-05	3.2453e-05	3.3055e-05	3.18352e-05	3.06605e-05	2.9529e-05	2.84394e-05
						5.12	5859.26	#REF!	16.7987	16.5	1817.54	2.57506	0.3139	317.218	1.58609	160.525		33.8323	541.615	0.00508595	-507.783		156.311	484.976	0.0278519	-328.665		1128.48	420.946	0.110876	707.536		5.12			3.96152e-05	3.81534e-05	3.67454e-05	3.74108e-05	3.60303e-05	3.47007e-05	3.34202e-05	3.21869e-05	3.09992e-05	3.15673e-05	3.04024e-05	2.92805e-05	2.82e-05	2.71594e-05
						5.14	5868.08	#REF!	16.8643	16.5	1817.54	2.57506	0.3139	317.532	1.58766	162.113		33.8334	547.842	0.00403918	-514.008		156.314	490.827	0.0253593	-334.513		1128.49	426.351	0.103921	702.137		5.14			3.78535e-05	3.64567e-05	3.51114e-05	3.57395e-05	3.44206e-05	3.31504e-05	3.19271e-05	3.07489e-05	2.96143e-05	3.01505e-05	2.90379e-05	2.79663e-05	2.69343e-05	2.59404e-05
						5.16	5876.86	#REF!	16.93	16.5	1817.54	2.57506	0.3139	317.846	1.58923	163.702		33.8344	554.107	0.0030396	-520.273		156.316	496.716	0.022985	-340.4		1128.5	431.795	0.0973175	696.7		5.16			3.61748e-05	3.48399e-05	3.35542e-05	3.41472e-05	3.28871e-05	3.16735e-05	3.05047e-05	2.9379e-05	2.82949e-05	2.8801e-05	2.77382e-05	2.67146e-05	2.57288e-05	2.47794e-05
						5.18	5885.6	#REF!	16.9956	16.5	1817.54	2.57506	0.3139	318.16	1.5908	165.293		33.8352	560.412	0.0021849	-526.577		156.318	502.645	0.0207231	-346.327		1128.5	437.277	0.091047	691.225		5.18			0	0	0	3.263e-05	3.14259e-05	3.02662e-05	2.91494e-05	2.80737e-05	2.70377e-05	2.75155e-05	2.65002e-05	2.55223e-05	2.45804e-05	2.36734e-05
						5.2	5894.3	#REF!	17.0612	17	2518.2	3.56775	0.434909	318.595	1.59297	166.886		33.8359	566.756	0.00153926	-532.92		156.32	508.612	0.0185678	-352.292		1128.51	442.797	0.0850916	685.711		5.2			0	0	0	0	0	0	0	0	0	2.62909e-05	2.53207e-05	2.43864e-05	2.34865e-05	2.26198e-05
						5.22	5902.96	#REF!	17.1268	17	2518.2	3.56775	0.434909	319.03	1.59515	168.481		33.8363	573.139	0.00106013	-539.303		156.322	514.618	0.0165139	-358.296		1128.51	448.355	0.0794344	680.158		5.22			0	0	0	0	0	0	0	0	0	0	0	0	0	0
						5.24	5911.57	#REF!	17.1924	17	2518.2	3.56775	0.434909	319.465	1.59732	170.078		33.8367	579.562	0.000713315	-545.725		156.324	520.663	0.0145563	-364.339		1128.52	453.952	0.0740594	674.567		5.24			0	0	0	0	0	0	0	0	0	0	0	0	0	0
						5.26	5920.15	#REF!	17.2581	17	2518.2	3.56775	0.434909	319.9	1.5995	171.678		33.837	586.024	0.0004438	-552.187		156.326	526.748	0.0126902	-370.421		1128.52	459.587	0.0689518	668.937		5.26			0	0	0	0	0	0	0	0	0	0	0	0	0	0
						5.28	5928.69	#REF!	17.3237	17	2518.2	3.56775	0.434909	320.335	1.60167	173.28		33.8372	592.526	0.000252159	-558.689		156.328	532.871	0.0109109	-376.543		1128.53	465.261	0.0640972	663.268		5.28			0	0	0	0	0	0	0	0	0	0	0	0	0	0
						5.3	5937.19	#REF!	17.3893	17	2518.2	3.56775	0.434909	320.769	1.60385	174.883		33.8373	599.067	0.000124125	-565.23		156.33	539.033	0.0092143	-382.703		1128.53	470.973	0.0594823	657.56		5.3			0	0	0	0	0	0	0	0	0	0	0	0	0	0
						5.32	5945.65	#REF!	17.4549	17	2518.2	3.56775	0.434909	321.204	1.60602	176.489		33.8374	605.648	4.78309e-05	-571.81		156.331	545.234	0.0075962	-388.903		1128.54	476.724	0.0550946	651.814		5.32			0	0	0	0	0	0	0	0	0	0	0	0	0	0
						5.34	5954.07	#REF!	17.5205	17.5	6276.27	8.89215	1.08395	322.288	1.61144	178.101		33.8374	612.268	6.29214e-06	-578.431		156.333	551.475	0.00605274	-395.142		1128.54	482.513	0.050922	646.029		5.34			0	0	0	0	0	0	0	0	0	0	0	0	0	0
						5.36	5962.45	#REF!	17.5862	17.5	6276.27	8.89215	1.08395	323.372	1.61686	179.718		33.8374	618.928	0	-585.091		156.334	557.755	0.00458021	-401.421		1128.55	488.341	0.0469531	640.205		5.36			0	0	0	0	0	0	0	0	0	0	0	0	0	0
						5.38	5970.8	#REF!	17.6518	17.5	6276.27	8.89215	1.08395	324.456	1.62228	181.34		33.8374	625.628	0	-591.791		156.336	564.074	0.00335942	-407.739		1128.55	494.208	0.0431774	634.342		5.38			0	0	0	0	0	0	0	0	0	0	0	0	0	0
						5.4	5979.11	#REF!	17.7174	17.5	6276.27	8.89215	1.08395	325.54	1.6277	182.968		33.8374	632.368	0	-598.53		156.337	570.432	0.0023545	-414.096		1128.55	500.113	0.0395847	628.44		5.4			0	0	0	0	0	0	0	0	0	0	0	0	0	0
						5.42	5987.39	#REF!	17.783	17.5	6276.27	8.89215	1.08395	326.624	1.63312	184.601		33.8374	639.147	0	-605.31		156.337	576.83	0.00156264	-420.493		1128.56	506.058	0.0361655	622.499		5.42			0	0	0	0	0	0	0	0	0	0	0	0	0	0
						5.44	5995.63	#REF!	17.8486	17.5	6276.27	8.89215	1.08395	327.708	1.63854	186.239		33.8374	645.967	0	-612.129		156.338	583.268	0.000899097	-426.93		1128.56	512.041	0.0329109	616.519		5.44			0	0	0	0	0	0	0	0	0	0	0	0	0	0
						5.46	6003.83	#REF!	17.9143	17.5	6276.27	8.89215	1.08395	328.792	1.64396	187.883		33.8374	652.826	0	-618.988		156.338	589.744	0.000394288	-433.406		1128.56	518.063	0.0298122	610.5		5.46			0	0	0	0	0	0	0	0	0	0	0	0	0	0
						5.48	6012	#REF!	17.9799	17.5	6276.27	8.89215	1.08395	329.876	1.64938	189.533		33.8374	659.725	0	-625.888		156.339	596.261	0	-439.922		1128.57	524.124	0.0268615	604.442		5.48			0	0	0	0	0	0	0	0	0	0	0	0	0	0
						5.5	6020.13		18.0455	18	0	0	0	329.876	1.64938	191.182												1128.57	530.225	0.0238851	598.344		5.5			0	0	0	0	0	0	0	0	0	0	0	0	0	0
						5.52	6028.23		18.1111	18	0	0	0	329.876	1.64938	192.832												1128.57	536.364	0.0210507	592.208		5.52
						5.54	6036.29		18.1767	18	0	0	0	329.876	1.64938	194.481												1128.57	542.542	0.0183509	586.032		5.54
						5.56	6044.32		18.2424	18	0	0	0	329.876	1.64938	196.13												1128.58	548.76	0.0157791	579.817		5.56
						5.58	6052.32		18.308	18	0	0	0	329.876	1.64938	197.78												1128.58	555.016	0.0133287	573.563		5.58
						5.6	6060.28		18.3736	18	0	0	0	329.876	1.64938	199.429												1128.58	561.313	0.0109937	567.269		5.6
						5.62	6068.21		18.4392	18	0	0	0	329.876	1.64938	201.078												1128.58	567.648	0.00876834	560.936		5.62
						5.64	6076.11		18.5048	18.5	0	0	0	329.876	1.64938	202.728												1128.59	574.023	0.00678431	554.563		5.64
						5.66	6083.98		18.5705	18.5	0	0	0	329.876	1.64938	204.377												1128.59	580.437	0.00514035	548.151		5.66
						5.68	6091.81		18.6361	18.5	0	0	0	329.876	1.64938	206.027												1128.59	586.891	0.00378775	541.698		5.68
						5.7	6099.61		18.7017	18.5	0	0	0	329.876	1.64938	207.676												1128.59	593.384	0.00268442	535.206		5.7
						5.72	6107.39		18.7673	18.5	0	0	0	329.876	1.64938	209.325												1128.59	599.917	0.001794	528.674		5.72
						5.74	6115.13		18.8329	18.5	0	0	0	329.876	1.64938	210.975												1128.59	606.489	0.00105207	522.103		5.74
						5.76	6122.84		18.8986	18.5	0	0	0	329.876	1.64938	212.624												1128.59	613.101	0.000470753	515.491		5.76
						5.78	6130.52		18.9642	18.5	0	0	0	329.876	1.64938	214.273												1128.59	619.753	0	508.84		5.78
[truncated: 136 more columns]

## Sheet: Bridgeport_3
																																			Annual	0.0561882	0.0564699	0.0567529	0.0624514	0.0627645	0.0630791	0.0633953	0.063713	0.0640324	0.0705035	0.0708569	0.0712121	0.0715691	0.0719278
	INPUTS			ERROR CHECK		Surge height (m)	Wall Length (m)	sum of middleH * dL	Surge height (ft)	Rounding (ft)	Area (sq m)	Buildings	Building Values (million $)	Cum Value	Marginal Damage	Damage	2030	Expected Benefit (million $, PV)	Total Cost (million $, PV)	Residual Dam (million $, PV)	Net Benefit (million $, PV)	2080	Expected Benefit (million $, PV)	Total Cost (million $, PV)	Residual Dam (million $, PV)	Net Benefit (million $, PV)	2130	Expected Benefit (million $, PV)	Total Cost (million $, PV)	Residual Dam (million $, PV)	Net Benefit (million $, PV)		Surge height (m)		YEAR-2030	0	1	2	3	4	5	6	7	8	9	10	11	12	13
	SPATIAL DATA					1.84	408.688	#REF!	6.03704	6	0	0	0	0	0	0		0	1.28012	1.77445	-1.28012		0	0.641874	6.43877	-0.641874		0	0.168853	30.7138	-0.168853		1.84		AGE	0	1	2	3	4	5	6	7	8	9	10	11	12	13
	Target City	Bridgeport				1.86	441.926	#REF!	6.10266	6	0	0	0	0	0	0		0	1.46007	1.77445	-1.46007		0	0.748073	6.43877	-0.748073		0	0.211298	30.7138	-0.211298		1.86			0	0	0	0	0	0	0	0	0	0	0	0	0	0
	Policy Year (base year: 2020)	#REF!				1.88	475.322	#REF!	6.16828	6	0	0	0	0	0	0		0	1.65414	1.77445	-1.65414		0	0.864854	6.43877	-0.864854		0	0.260402	30.7138	-0.260402		1.88			0	0	0	0	0	0	0	0	0	0	0	0	0	0
	SLR rate (before policy)	3.14	mm/year			1.9	508.87	#REF!	6.2339	6	0	0	0	0	0	0		0	1.86287	1.77445	-1.86287		0	0.992725	6.43877	-0.992725		0	0.316669	30.7138	-0.316669		1.9			0	0	0	0	0	0	0	0	0	0	0	0	0	0
	SLR rate (after policy)	#REF!	mm/year			1.92	542.564	#REF!	6.29952	6	0	0	0	0	0	0		0	2.08677	1.77445	-2.08677		0	1.13219	6.43877	-1.13219		0	0.380606	30.7138	-0.380606		1.92			0	0	0	0	0	0	0	0	0	0	0	0	0	0
	MHHW	1.06	meter			1.94	576.397	#REF!	6.36514	6	0	0	0	0	0	0		0	2.32636	1.77445	-2.32636		0	1.28377	6.43877	-1.28377		0	0.452723	30.7138	-0.452723		1.94			0	0	0	0	0	0	0	0	0	0	0	0	0	0
						1.96	610.362	#REF!	6.43076	6	0	0	0	0	0	0		0	2.58215	1.77445	-2.58215		0	1.44796	6.43877	-1.44796		0	0.533529	30.7138	-0.533529		1.96			0	0	0	0	0	0	0	0	0	0	0	0	0	0
						1.98	644.454	#REF!	6.49638	6	0	0	0	0	0	0		0	2.85465	1.77445	-2.85465		0	1.62526	6.43877	-1.62526		0	0.623538	30.7138	-0.623538		1.98			0	0	0	0	0	0	0	0	0	0	0	0	0	0
	GEV ESTIMATION					2	678.664	#REF!	6.562	6.5	0	0	0	0	0	0		0	3.14439	1.77445	-3.14439		0	1.8162	6.43877	-1.8162		0	0.723261	30.7138	-0.723261		2			0	0	0	0	0	0	0	0	0	0	0	0	0	0
	μ (location)	1.845				2.02	712.986	#REF!	6.62762	6.5	0	0	0	0	0	0		0	3.45185	1.77445	-3.45185		0	2.02126	6.43877	-2.02126		0	0.833211	30.7138	-0.833211		2.02			0	0	0	0	0	0	0	0	0	0	0	0	0	0
	σ (scale)	0.1544				2.04	747.411	#REF!	6.69324	6.5	0	0	0	0	0	0		0	3.77756	1.77445	-3.77756		0	2.24095	6.43877	-2.24095		0	0.953901	30.7138	-0.953901		2.04			0	0	0	0	0	0	0	0	0	0	0	0	0	0
	k (shape)	0.0752				2.06	781.931	#REF!	6.75886	6.5	0	0	0	0	0	0		0	4.12199	1.77445	-4.12199		0	2.47577	6.43877	-2.47577		0	1.08584	30.7138	-1.08584		2.06			0	0	0	0	0	0	0	0	0	0	0	0	0	0
						2.08	816.539	#REF!	6.82448	6.5	0	0	0	0	0	0		0	4.48565	1.77445	-4.48565		0	2.72621	6.43877	-2.72621		0	1.22955	30.7138	-1.22955		2.08			0	0	0	0	0	0	0	0	0	0	0	0	0	0
	Coefficients of the cost function					2.1	851.225	#REF!	6.8901	6.5	0	0	0	0	0	0		0	4.86901	1.77445	-4.86901		0	2.99277	6.43877	-2.99277		0	1.38553	30.7138	-1.38553		2.1			0	0	0	0	0	0	0	0	0	0	0	0	0	0
	coef1	1.5846				2.12	885.982	#REF!	6.95572	6.5	0	0	0	0	0	0		0	5.27256	1.77445	-5.27256		0	3.27592	6.43877	-3.27592		0	1.55429	30.7138	-1.55429		2.12			0	0	0	0	0	0	0	0	0	0	0	0	0	0
	coef2	0.000650184				2.14	920.801	#REF!	7.02134	7	0	0	0	0	0	0		0	5.69677	1.77445	-5.69677		0	3.57615	6.43877	-3.57615		0	1.73633	30.7138	-1.73633		2.14			0	0	0	0	0	0	0	0	0	0	0	0	0	0
	coef3	-7.03899e-08				2.16	955.671	#REF!	7.08696	7	0	0	0	0	0	0		0	6.14209	1.77445	-6.14209		0	3.89394	6.43877	-3.89394		0	1.93216	30.7138	-1.93216		2.16			0	0	0	0	0	0	0	0	0	0	0	0	0	0
	coef4	2.09933e-11				2.18	990.585	#REF!	7.15258	7	0	0	0	0	0	0		0	6.609	1.77445	-6.609		0	4.22976	6.43877	-4.22976		0	2.14227	30.7138	-2.14227		2.18			0	0	0	0	0	0	0	0	0	0	0	0	0	0
	q	2.72236e+07				2.2	1025.53	#REF!	7.2182	7	0	0	0	0	0	0		0	7.09792	1.77445	-7.09792		0	4.58406	6.43877	-4.58406		0	2.36716	30.7138	-2.36716		2.2			0	0	0	0	0	0	0	0	0	0	0	0	0	0
	Growth Rate	0.005	%/year			2.22	1060.51	#REF!	7.28382	7	0	0	0	0	0	0		0	7.60931	1.77445	-7.60931		0	4.95731	6.43877	-4.95731		0	2.60731	30.7138	-2.60731		2.22			0	0	0	0	0	0	0	0	0	0	0	0	0	0
	discount rate	0.0426	%/year			2.24	1095.5	#REF!	7.34944	7	0	0	0	0	0	0		0	8.14359	1.77445	-8.14359		0	5.34996	6.43877	-5.34996		0	2.86322	30.7138	-2.86322		2.24			0	0	0	0	0	0	0	0	0	0	0	0	0	0
	useful_life	30	years			2.26	1130.49	#REF!	7.41506	7	0	0	0	0	0	0		0	8.70119	1.77445	-8.70119		0	5.76244	6.43877	-5.76244		0	3.13536	30.7138	-3.13536		2.26			0	0	0	0	0	0	0	0	0	0	0	0	0	0
	CapEx	0.005				2.28	1165.48	#REF!	7.48068	7	0	0	0	0	0	0		0	9.2825	1.77445	-9.2825		0	6.1952	6.43877	-6.1952		0	3.42419	30.7138	-3.42419		2.28			0	0	0	0	0	0	0	0	0	0	0	0	0	0
	Difference	0.02	meter			2.3	1200.46	#REF!	7.5463	7.5	0	0	0	0	0	0		0	9.88794	1.77445	-9.88794		0	6.64865	6.43877	-6.64865		0	3.7302	30.7138	-3.7302		2.3			0	0	0	0	0	0	0	0	0	0	0	0	0	0
	Minimum height where buildings locate	8	ft			2.32	1235.41	#REF!	7.61192	7.5	0	0	0	0	0	0		0	10.5179	1.77445	-10.5179		0	7.12321	6.43877	-7.12321		0	4.05384	30.7138	-4.05384		2.32			0	0	0	0	0	0	0	0	0	0	0	0	0	0
	A factor to account for other damages than buildings	2				2.34	1270.34	#REF!	7.67754	7.5	0	0	0	0	0	0		0	11.1727	1.77445	-11.1727		0	7.6193	6.43877	-7.6193		0	4.39556	30.7138	-4.39556		2.34			0	0	0	0	0	0	0	0	0	0	0	0	0	0
	Ratio of houses w/ basements	1	(1=All have basements; 0=No basements)			2.36	1305.22	#REF!	7.74316	7.5	0	0	0	0	0	0		0	11.8528	1.77445	-11.8528		0	8.13732	6.43877	-8.13732		0	4.75581	30.7138	-4.75581		2.36			0	0	0	0	0	0	0	0	0	0	0	0	0	0
	Average height of the first floor	0.9	meter			2.38	1340.05	#REF!	7.80878	7.5	0	0	0	0	0	0		0	12.5585	1.77445	-12.5585		0	8.67764	6.43877	-8.67764		0	5.13503	30.7138	-5.13503		2.38			0	0	0	0	0	0	0	0	0	0	0	0	0	0
	Coastal length 12ft	3233				2.4	1374.83	#REF!	7.8744	7.5	0	0	0	0	0	0		0	13.2902	1.77445	-13.2902		0	9.24066	6.43877	-9.24066		0	5.53364	30.7138	-5.53364		2.4			0	0	0	0	0	0	0	0	0	0	0	0	0	0
	OUTPUTS	2030	2080	2130		2.42	1409.53	#REF!	7.94002	7.5	0	0	0	0	0	0		0	14.0482	1.77445	-14.0482		0	9.82675	6.43877	-9.82675		0	5.95208	30.7138	-5.95208		2.42			0	0	0	0	0	0	0	0	0	0	0	0	0	0
	Optimal Level of Flood Defense	No_Wall	No_Wall	No_Wall		2.44	1444.16	#REF!	8.00564	8	0	0	0.644621	0.644621	0.0032231	0.0032231		0.000868124	14.8328	1.77358	-14.8319		0.00336743	10.4363	6.4354	-10.4329		0.0324368	6.39076	30.6813	-6.35832		2.44			2.61253e-05	2.51613e-05	2.42328e-05	2.5962e-05	2.5004e-05	2.40813e-05	2.31926e-05	2.23368e-05	2.15125e-05	2.30429e-05	2.21926e-05	2.13736e-05	2.05849e-05	1.98253e-05
	Maximum height of Walls					2.46	1478.71	#REF!	8.07126	8	0	0	0.644621	1.28924	0.00644621	0.00966931		0.00321346	15.6443	1.77123	-15.6411		0.0124321	11.0696	6.42633	-11.0571		0.113252	6.85008	30.6005	-6.73683		2.46			7.04499e-05	6.78502e-05	6.53464e-05	7.00156e-05	6.74319e-05	6.49435e-05	6.2547e-05	6.02389e-05	5.80159e-05	6.2156e-05	5.98623e-05	5.76532e-05	5.55257e-05	5.34767e-05
	Average height of Walls	#VALUE!	#VALUE!	#VALUE!		2.48	1513.16	#REF!	8.13688	8	0	0	0.644621	1.93386	0.00966931	0.0193386		0.00743509	16.4831	1.76701	-16.4757		0.028758	11.727	6.41001	-11.6982		0.24789	7.33044	30.4659	-7.08255		2.48			0.000126653	0.000121979	0.000117478	0.00012587	0.000121225	0.000116752	0.000112443	0.000108294	0.000104298	0.00011175	0.000107626	0.000103655	9.98296e-05	9.61457e-05
	Average Elevation of wall	1.1	1.316	1.576		2.5	1547.51	#REF!	8.2025	8	0	0	0.644621	2.57848	0.0128924	0.032231		0.013765	17.3494	1.76068	-17.3357		0.053327	12.4089	6.38544	-12.3556		0.435479	7.83223	30.2783	-7.39675		2.5			0.000189764	0.000182762	0.000176017	0.000188571	0.000181613	0.000174911	0.000168456	0.00016224	0.000156253	0.000167415	0.000161237	0.000155287	0.000149557	0.000144038
	Wall Length	No_Wall	No_Wall	No_Wall		2.52	1581.75	#REF!	8.26812	8	0	0	0.644621	3.2231	0.0161155	0.0483466		0.0223045	18.2436	1.75214	-18.2213		0.0866648	13.1156	6.3521	-13.0289		0.671687	8.35584	30.0421	-7.68416		2.52			0.000255938	0.000246494	0.000237398	0.000254283	0.000244899	0.000235862	0.000227158	0.000218776	0.000210703	0.00022573	0.000217401	0.000209378	0.000201652	0.00019421
	Cost of Wall	No_Wall	No_Wall	No_Wall		2.54	1615.87	#REF!	8.33374	8	0	0	0.644621	3.86772	0.0193386	0.0676852		0.0330554	19.1659	1.74139	-19.1328		0.128931	13.8473	6.30984	-13.7184		0.950631	8.90164	29.7631	-7.95101		2.54			0.000322256	0.000310364	0.000298911	0.000320092	0.00030828	0.000296904	0.000285948	0.000275396	0.000265233	0.000284098	0.000273614	0.000263518	0.000253793	0.000244428
	Expected Benefit	No_Wall	No_Wall	No_Wall		2.56	1649.87	#REF!	8.39936	8	0	0	0.644621	4.51234	0.0225617	0.0902469		0.0459455	20.1165	1.7285	-20.0706		0.179974	14.6045	6.25879	-14.4246		1.2661	9.46999	29.4477	-8.20388		2.56			0.000386553	0.000372289	0.00035855	0.000383841	0.000369676	0.000356034	0.000342896	0.000330243	0.000318056	0.000340594	0.000328025	0.000315921	0.000304262	0.000293035
	Net Benefit	#VALUE!	#VALUE!	#VALUE!		2.58	1683.74	#REF!	8.46498	8	0	0	0.644621	5.15697	0.0257848	0.116032		0.0608492	21.0958	1.7136	-21.0349		0.239399	15.3874	6.19937	-15.148		1.61233	10.0612	29.1014	-8.44891		2.58			0.000447277	0.000430772	0.000414876	0.000443982	0.000427598	0.000411819	0.000396622	0.000381986	0.00036789	0.000393839	0.000379305	0.000365308	0.000351828	0.000338845
	Residual Damage	1.77445	6.43877	30.7138		2.6	1717.47	#REF!	8.5306	8.5	0	0	1.72962	6.88659	0.0344329	0.150465		0.0782317	22.1039	1.69622	-22.0257		0.309138	16.1963	6.12963	-15.8872		1.99829	10.6758	28.7155	-8.67747		2.6			0.000522191	0.000502922	0.000484363	0.000518139	0.000499019	0.000480604	0.000462869	0.000445788	0.000429338	0.000459458	0.000442503	0.000426174	0.000410448	0.000395301
	Expected Damage	1.77445	6.43877	30.7138		2.62	1751.06	#REF!	8.59622	8.5	0	0	1.72962	8.61621	0.043081	0.193546		0.0983465	23.1411	1.6761	-23.0428		0.390224	17.0315	6.04854	-16.6413		2.42847	11.3139	28.2853	-8.88539		2.62			0.000605008	0.000582682	0.00056118	0.000600054	0.000577911	0.000556585	0.000536046	0.000516265	0.000497214	0.000531886	0.000512258	0.000493355	0.000475149	0.000457615
						2.64	1784.5	#REF!	8.66184	8.5	0	0	1.72962	10.3458	0.0517292	0.245275		0.121285	24.2077	1.65316	-24.0864		0.483003	17.8932	5.95576	-17.4102		2.90465	11.9759	27.8091	-9.07124		2.64			0.000690897	0.000665402	0.000640847	0.000684924	0.000659649	0.000635306	0.000611862	0.000589284	0.000567538	0.000606852	0.000584458	0.000562891	0.000542119	0.000522114
	Surge height (ft)	Area submerged (sq m)	delta Area (sq m)	Building numbers	Building Values (million $)	2.66	1817.78	#REF!	8.72746	8.5	0	0	1.72962	12.0755	0.0603773	0.305652		0.147015	25.3039	1.62743	-25.1568		0.587278	18.7817	5.85149	-18.1945		3.42677	12.6622	27.287	-9.2354		2.66			0.000776215	0.000747571	0.000719984	0.000769129	0.000740747	0.000713412	0.000687086	0.000661731	0.000637312	0.000681145	0.00065601	0.000631802	0.000608487	0.000586033
0.9144	3	1309.3	0	0	0	2.68	1850.9	#REF!	8.79308	8.5	0	0	1.72962	13.8051	0.0690254	0.374677		0.175417	26.4298	1.59903	-26.2543		0.702459	19.6973	5.73631	-18.9949		3.99357	13.373	26.7202	-9.37945		2.68			0.000858277	0.000826605	0.000796102	0.00085001	0.000818643	0.000788433	0.000759339	0.000731318	0.00070433	0.000752407	0.000724642	0.000697901	0.000672147	0.000647344
1.0668	3.5	4578.8	3269.5		0	2.7	1883.85	#REF!	8.8587	8.5	0	0	1.72962	15.5347	0.0776735	0.452351		0.206308	27.5856	1.56814	-27.3793		0.827679	20.6403	5.61109	-19.8126		4.60292	14.1087	26.1108	-9.50581		2.7			0.000935168	0.000900658	0.000867422	0.000925672	0.000891513	0.000858614	0.00082693	0.000796414	0.000767025	0.000818964	0.000788743	0.000759637	0.000731605	0.000704607
1.2192	4	5888.1	1309.3		0	2.72	1916.64	#REF!	8.92432	8.5	0	0	1.72962	17.2643	0.0863216	0.538673		0.239462	28.7717	1.53499	-28.5322		0.961887	21.6107	5.47688	-20.6489		5.25205	14.8696	25.4617	-9.61757		2.72			0.00100558	0.000968476	0.000932737	0.000994834	0.000958122	0.000922766	0.000888714	0.000855919	0.000824334	0.00087969	0.000847228	0.000815963	0.000785853	0.000756853
1.3716	4.5	7848.3	1960.2		0	2.74	1949.24	#REF!	8.98994	8.5	0	0	1.72962	18.9939	0.0949697	0.633642		0.274627	29.9881	1.49982	-29.7135		1.10393	22.609	5.33484	-21.5051		5.93779	15.656	24.776	-9.71818		2.74			0.0010687	0.00102927	0.000991285	0.00105669	0.0010177	0.000980145	0.000943975	0.000909141	0.000875592	0.000933884	0.000899422	0.000866231	0.000834266	0.00080348
1.524	5	9812.2	1963.9		0	2.76	1981.67	#REF!	9.05556	9	0	0	2.07986	21.0738	0.105369	0.739011		0.311626	31.2351	1.46282	-30.9235		1.25294	23.6353	5.18582	-22.3824		6.65819	16.4681	24.0556	-9.80987		2.76			0.00112675	0.00108518	0.00104513	0.00111346	0.00107237	0.0010328	0.00099469	0.000957984	0.000922632	0.000983511	0.000947217	0.000912263	0.000878599	0.000846177
1.6764	5.5	10466.9	654.7		0	2.78	2013.91	#REF!	9.12118	9	0	0	2.07986	23.1537	0.115768	0.85478		0.350253	32.5128	1.42419	-32.1626		1.40797	24.6898	5.03079	-23.2819		7.41216	17.3062	23.3016	-9.89402		2.78			0.00117882	0.00113531	0.00109342	0.00116424	0.00112128	0.0010799	0.00104005	0.00100167	0.00096471	0.00102778	0.000989858	0.00095333	0.00091815	0.000884269
1.8288	6	13081.8	2614.9		0	2.8	2045.96	#REF!	9.1868	9	0	0	2.07986	25.2335	0.126168	0.980947		0.390286	33.8214	1.38416	-33.4312		1.568	25.7728	4.87076	-24.2048		8.19446	18.1706	22.5193	-9.97614		2.8			0.00122434	0.00117916	0.00113564	0.00120851	0.00116391	0.00112096	0.00107959	0.00103975	0.00100139	0.00106625	0.0010269	0.000989008	0.000952512	0.000917362
1.9812	6.5	16332.6	3250.8		0	2.82	2077.83	#REF!	9.25242	9	0	0	2.07986	27.3134	0.136567	1.11751		0.431495	35.1611	1.34295	-34.7296		1.732	26.8845	4.70677	-25.1525		9.00107	19.0616	21.7127	-10.0605		2.82			0.00126307	0.00121646	0.00117157	0.00124601	0.00120003	0.00115574	0.00111309	0.00107202	0.00103246	0.0010987	0.00105816	0.00101911	0.000981501	0.000945282
2.1336	7	25185.2	8852.6		0	2.84	2109.5	#REF!	9.31804	9	0	0	2.07986	29.3932	0.146966	1.26448		0.473651	36.532	1.3008	-36.0584		1.89896	28.025	4.53981	-26.126		9.82737	19.9794	20.8864	-10.152		2.84			0.00129496	0.00124717	0.00120115	0.00127672	0.00122961	0.00118423	0.00114053	0.00109845	0.00105791	0.00112513	0.00108361	0.00104362	0.00100511	0.000968021
2.286	7.5	40827	15641.8		0	2.86	2140.97	#REF!	9.38366	9	0	0	2.07986	31.4731	0.157365	1.42185		0.516532	37.9343	1.25792	-37.4178		2.06791	29.1945	4.37086	-27.1266		10.6685	20.9242	20.0453	-10.2558		2.86			0.00132015	0.00127144	0.00122452	0.00130079	0.00125279	0.00120656	0.00116204	0.00111916	0.00107786	0.00114567	0.00110339	0.00106268	0.00102346	0.000985695
2.4384	8	55938.5	15111.5	27.2244	5.15697	2.88	2172.25	#REF!	9.44928	9	0	0	2.07986	33.553	0.167765	1.58961		0.559924	39.3682	1.21452	-38.8082		2.23795	30.3934	4.20082	-28.1554		11.519	21.8964	19.1948	-10.3774		2.88			0.00133889	0.00128948	0.0012419	0.00131848	0.00126983	0.00122297	0.00117784	0.00113437	0.00109251	0.00116057	0.00111774	0.00107649	0.00103677	0.00099851
2.5908	8.5	96485.1	40546.6	73.0475	13.837	2.9	2203.32	#REF!	9.5149	9.5	0	0	0.924817	34.4778	0.172389	1.762		0.603483	40.8337	1.17096	-40.2302		2.40768	31.6216	4.03109	-29.2139		12.3708	22.8961	18.343	-10.5253		2.9			0.00134709	0.00129738	0.0012495	0.00132578	0.00127685	0.00122974	0.00118436	0.00114065	0.00109856	0.0011663	0.00112327	0.00108181	0.00104189	0.00100345
2.7432	9	139148	42662.4	76.8593	14.559	2.92	2234.19	#REF!	9.58052	9.5	0	0	0.924817	35.4026	0.177013	1.93901		0.646921	42.331	1.12753	-41.6841		2.57595	32.8795	3.86282	-30.3035		13.2166	23.9236	17.4972	-10.7071		2.92			0.00134637	0.00129669	0.00124884	0.00132429	0.00127542	0.00122836	0.00118303	0.00113937	0.00109733	0.00116431	0.00112135	0.00107997	0.00104011	0.00100173
2.8956	9.5	160828	21680	39.058	7.39854	2.94	2264.86	#REF!	9.64614	9.5	0	0	0.924817	36.3274	0.181637	2.12065		0.689996	43.8604	1.08445	-43.1704		2.74181	34.1671	3.69696	-31.4253		14.0504	24.9791	16.6633	-10.9287		2.94			0.00133813	0.00128875	0.0012412	0.00131542	0.00126688	0.00122013	0.0011751	0.00113174	0.00108998	0.00115583	0.00111318	0.0010721	0.00103254	0.000994436
3.048	10	178968	18140.9	32.6821	6.19078	2.96	2295.31	#REF!	9.71176	9.5	0	0	0.924817	37.2522	0.186261	2.30691		0.732508	45.4218	1.04194	-44.6893		2.9045	35.4848	3.53426	-32.5803		14.8676	26.0629	15.8462	-11.1953		2.96			0.00132362	0.00127477	0.00122773	0.00130039	0.0012524	0.00120619	0.00116168	0.00111881	0.00107752	0.00114196	0.00109982	0.00105923	0.00102014	0.000982497
3.2004	10.5	197452	18484	33.3002	6.30787	2.98	2325.57	#REF!	9.77738	9.5	0	0	0.924817	38.177	0.190885	2.4978		0.774293	47.0154	1.00015	-46.2411		3.06342	36.8325	3.37535	-33.7691		15.6641	27.1751	15.0497	-11.511		2.98			0.00130389	0.00125578	0.00120944	0.00128027	0.00123302	0.00118752	0.0011437	0.00110149	0.00106085	0.00112363	0.00108216	0.00104223	0.00100377	0.000966729
3.3528	11	224950	27497.9	49.5394	9.38396	3	2355.61	#REF!	9.843	9.5	0	0	0.924817	39.1019	0.195509	2.6933		0.815217	48.6415	0.959231	-47.8262		3.21808	38.2106	3.22068	-34.9925		16.4371	28.316	14.2767	-11.8789		3			0.0012799	0.00123266	0.00118718	0.00125598	0.00120963	0.00116499	0.001122	0.0010806	0.00104072	0.00110167	0.00106102	0.00102186	0.000984155	0.000947838
3.5052	11.5	246328	21377.2	38.5125	7.2952	3.02	2385.44	#REF!	9.90862	9.5	0	0	0.924817	40.0267	0.200133	2.89344		0.855173	50.3	0.919274	-49.4448		3.36813	39.6191	3.07064	-36.2509		17.1842	29.4857	13.5296	-12.3015		3.02			0.00125244	0.00120622	0.00116171	0.00122833	0.001183	0.00113935	0.0010973	0.00105681	0.00101781	0.0010768	0.00103706	0.000998791	0.000961934	0.000926437
3.6576	12	269335	23007.3	41.4493	7.85149	3.04	2415.07	#REF!	9.97424	9.5	0	0	0.924817	40.9515	0.204757	3.0982		0.894081	51.9911	0.880367	-51.097		3.5133	41.0582	2.92547	-37.5449		17.9038	30.6845	12.8099	-12.7807		3.04			0.00122223	0.00117713	0.00113369	0.00119802	0.00115381	0.00111123	0.00107022	0.00103073	0.000992695	0.00104962	0.00101089	0.000973584	0.000937657	0.000903056
3.81	12.5	294502	25167.1	45.3403	8.58855	3.06	2444.48	#REF!	10.0399	10	0	0	0.773848	41.7253	0.208627	3.30682		0.931866	53.7149	0.842581	-52.7831		3.65338	42.5281	2.78539	-38.8747		18.5948	31.9126	12.1189	-13.3178		3.06			0.00118961	0.00114571	0.00110343	0.00116538	0.00112237	0.00108096	0.00104107	0.00100265	0.000965649	0.00102044	0.000982786	0.000946519	0.000911591	0.000877951
3.9624	13	323608	29106.6	52.4376	9.93295	3.08	2473.69	#REF!	10.1055	10	0	0	0.773848	42.4992	0.212496	3.51932		0.968477	55.4716	0.80597	-54.5031		3.78823	44.0289	2.65054	-40.2407		19.2564	33.1702	11.4573	-13.9138		3.08			0.00115516	0.00111253	0.00107148	0.001131	0.00108926	0.00104907	0.00101035	0.000973071	0.000937162	0.000989778	0.000953253	0.000918076	0.000884197	0.000851569
4.1148	13.5	356112	29106.6	52.4376	9.93295	3.1	2502.68	#REF!	10.1711	10	0	0	0.773848	43.273	0.216365	3.73568		1.00388	57.2613	0.770569	-56.2574		3.91778	45.5607	2.52098	-41.643		19.8883	34.4575	10.8254	-14.5691		3.1			0.00111941	0.0010781	0.00103832	0.00109538	0.00105496	0.00101603	0.000978538	0.000942428	0.00090765	0.000958069	0.000922715	0.000888665	0.000855871	0.000824288
4.2672	14	382937	32503.4	58.5571	11.0921	3.12	2531.46	#REF!	10.2367	10	0	0	0.773848	44.0469	0.220234	3.95592		1.03805	59.084	0.736399	-58.046		4.04203	47.1238	2.39674	-43.0818		20.4906	35.7745	10.2232	-15.284		3.12			0.00108278	0.00104282	0.00100434	0.00105896	0.00101988	0.000982242	0.000945996	0.000911087	0.000877466	0.000925691	0.000891532	0.000858633	0.000826947	0.000796431
4.4196	14.5	410370	26825.5	48.328	9.1545	3.14	2560.03	#REF!	10.3023	10	0	0	0.773848	44.8207	0.224104	4.18002		1.07098	60.94	0.703471	-59.869		4.16098	48.7182	2.27778	-44.5573		21.0634	37.1217	9.65035	-16.0583		3.14			0.00104565	0.00100706	0.000969898	0.00102208	0.00098436	0.000948036	0.000913051	0.000879358	0.000846908	0.00089296	0.000860008	0.000828272	0.000797707	0.00076827
4.572	15	450869	27433	49.4225	9.36181	3.16	2588.4	#REF!	10.368	10	0	0	0.773848	45.5946	0.227973	4.40799		1.10266	62.8292	0.671786	-61.7265		4.27472	50.3441	2.16405	-46.0694		21.6074	38.499	9.10633	-16.8916		3.16			0.00100832	0.000971108	0.000935272	0.000985052	0.000948702	0.000913693	0.000879976	0.000847503	0.000816229	0.00086014	0.0008284	0.00079783	0.000768389	0.000740034
4.7244	15.5	468054	40498.5	72.9609	13.8206	3.18	2616.55	#REF!	10.4336	10	0	0	0.773848	46.3684	0.231842	4.63984		1.13311	64.7518	0.641335	-63.6187		4.38332	52.0017	2.05545	-47.6184		22.1233	39.9068	8.59045	-17.7834		3.18			0.00097105	0.000935216	0.000900705	0.000948135	0.000913147	0.00087945	0.000846996	0.000815741	0.000785638	0.000827454	0.00079692	0.000767512	0.000739189	0.000711912
4.8768	16	523254	17185.6	30.9611	5.86478	3.2	2644.5	#REF!	10.4992	10	0	0	0.773848	47.1423	0.235711	4.87555		1.16234	66.708	0.612105	-65.5457		4.48691	53.691	1.95185	-49.2041		22.6119	41.3451	8.10189	-18.7332		3.2			0.000934065	0.000899596	0.0008664	0.000911536	0.000877899	0.000845503	0.000814302	0.000784253	0.000755312	0.000795086	0.000765746	0.000737488	0.000710273	0.000684063
5.0292	16.5	571045	55199.6	99.4459	18.8375	3.22	2672.24	#REF!	10.5648	10.5	0	0	0.901124	48.0434	0.240217	5.11576		1.19038	68.6978	0.584071	-67.5074		4.58563	55.4121	1.85313	-50.8265		23.0741	42.8141	7.63967	-19.74		3.22			0.000897654	0.000864528	0.000832626	0.00087554	0.000843231	0.000812114	0.000782145	0.000753283	0.000725485	0.000763281	0.000735114	0.000707987	0.000681861	0.000656699
5.1816	17	612875	47791.1	86.099	16.3092	3.24	2699.77	#REF!	10.6304	10.5	0	0	0.901124	48.9445	0.244723	5.36049		1.21724	70.7213	0.557208	-69.5041		4.67964	57.1653	1.75912	-52.4857		23.511	44.3141	7.20276	-20.803		3.24			0.000861934	0.000830127	0.000799494	0.000840261	0.000809253	0.00077939	0.00075063	0.00072293	0.000696252	0.000732138	0.00070512	0.0006791	0.00065404	0.000629905
5.334	17.5	655298	41830	75.3597	14.2749	3.26	2727.1	#REF!	10.6961	10.5	0	0	0.901124	49.8456	0.249228	5.60972		1.24296	72.7786	0.531484	-71.5357		4.7691	58.9507	1.66966	-54.1816		23.9237	45.8451	6.79008	-21.9214		3.26			0.000827004	0.000796486	0.000767094	0.000805791	0.000776056	0.000747418	0.000719837	0.000693273	0.00066769	0.000701736	0.000675841	0.000650901	0.000626881	0.000603748
5.4864	18	688000	42423.1	76.4282	14.4773	3.28	2754.22	#REF!	10.7617	10.5	0	0	0.901124	50.7468	0.253734	5.86345		1.26758	74.8699	0.50687	-73.6023		4.85418	60.7683	1.58459	-55.9141		24.3132	47.4073	6.40058	-23.0941		3.28			0.000792938	0.000763677	0.000735496	0.000772203	0.000743707	0.000716263	0.000689831	0.000664375	0.000639859	0.000672137	0.000647334	0.000623446	0.00060044	0.000578282
						3.3	2781.14	#REF!	10.8273	10.5	0	0	0.901124	51.6479	0.258239	6.12169		1.29112	76.9952	0.48333	-75.7041		4.93504	62.6183	1.50373	-57.6833		24.6806	49.001	6.03316	-24.3204		3.3			0.000759797	0.000731759	0.000704756	0.000739553	0.000712262	0.000685978	0.000660664	0.000636284	0.000612804	0.000643388	0.000619645	0.000596779	0.000574757	0.000553547
					219.628	3.32	2807.85	#REF!	10.8929	10.5	0	0	0.901124	52.549	0.262745	6.38443		1.31362	79.1546	0.46083	-77.841		5.01186	64.5009	1.42691	-59.489		25.027	50.6262	5.68675	-25.5992		3.32			0.000727624	0.000700773	0.000674914	0.000707881	0.000681759	0.000656601	0.000632371	0.000609035	0.000586561	0.000615522	0.000592808	0.000570932	0.000549864	0.000529573
						3.34	2834.37	#REF!	10.9585	10.5	0	0	0.901124	53.4501	0.267251	6.65168		1.33511	81.3483	0.439336	-80.0132		5.0848	66.4161	1.35397	-61.3313		25.3535	52.2831	5.36031	-26.9297		3.34			0.000696451	0.000670751	0.000645999	0.000677217	0.000652227	0.000628158	0.000604978	0.000582653	0.000561152	0.000588563	0.000566844	0.000545926	0.00052578	0.000506378
						3.36	2860.68	#REF!	11.0242	11	0	0	1.173	54.6231	0.273116	6.9248		1.35564	83.5763	0.418807	-82.2206		5.15405	68.3641	1.28471	-63.21		25.661	53.9719	5.05275	-28.3109		3.36			0.00066643	0.000641838	0.000618153	0.000647706	0.000623805	0.000600785	0.000578615	0.000557263	0.000536699	0.000562635	0.000541873	0.000521877	0.000502618	0.000484071
12 foot wall						3.38	2886.8	#REF!	11.0898	11	0	0	1.173	55.7961	0.278981	7.20378		1.37524	85.8387	0.399205	-84.4634		5.21979	70.3449	1.21898	-65.1251		25.9508	55.6927	4.76301	-29.742		3.38			0.00063754	0.000614014	0.000591356	0.000619326	0.000596472	0.000574461	0.000553262	0.000532846	0.000513183	0.000537718	0.000517875	0.000498764	0.000480359	0.000462633
4.76	Cost	335.13				3.4	2912.73	#REF!	11.1554	11	0	0	1.173	56.9691	0.284846	7.48863		1.39396	88.1356	0.380492	-86.7416		5.28217	72.3587	1.15659	-67.0766		26.2237	57.4457	4.49012	-31.222		3.4			0.00060976	0.000587258	0.000565587	0.000592054	0.000570206	0.000549164	0.000528899	0.000509381	0.000490584	0.000513788	0.000494829	0.000476569	0.000458982	0.000442045
4.976	Cost	344.482				3.42	2938.45	#REF!	11.221	11	0	0	1.173	58.1421	0.290711	7.77934		1.41182	90.4671	0.362631	-89.0553		5.34137	74.4057	1.09739	-69.0643		26.4807	59.231	4.2331	-32.7503		3.42			0.000583063	0.000561547	0.000540825	0.000565862	0.000544981	0.00052487	0.000505501	0.000486847	0.000468882	0.000490823	0.00047271	0.000455266	0.000438466	0.000422286
5.236	Cost	359.511				3.44	2963.99	#REF!	11.2866	11	0	0	1.173	59.3151	0.296576	8.07591		1.42886	92.8334	0.345586	-91.4045		5.39754	76.4859	1.04122	-71.0884		26.7227	61.0487	3.99107	-34.326		3.44			0.000557424	0.000536854	0.000517043	0.000540725	0.000520771	0.000501553	0.000483045	0.00046522	0.000448052	0.000468795	0.000451495	0.000434834	0.000418788	0.000403334
						3.46	2989.33	#REF!	11.3523	11	0	0	1.173	60.4881	0.302441	8.37835		1.44512	95.2344	0.329323	-93.7893		5.45084	78.5995	0.987931	-73.1486		26.9506	62.899	3.76316	-35.9484		3.46			0.000532816	0.000513154	0.000494218	0.000516612	0.000497548	0.000479188	0.000461505	0.000444474	0.000428072	0.000447679	0.000431158	0.000415248	0.000399924	0.000385166
						3.48	3014.48	#REF!	11.4179	11	0	0	1.173	61.6611	0.308306	8.68666		1.46064	97.6704	0.313808	-96.2098		5.50139	80.7465	0.937378	-75.2451		27.1652	64.7821	3.54856	-37.6169		3.48			0.00050921	0.000490419	0.000472321	0.000493495	0.000475284	0.000457746	0.000440854	0.000424586	0.000408918	0.000427447	0.000411673	0.000396482	0.000381851	0.00036776
						3.5	3039.45	#REF!	11.4835	11	0	0	1.173	62.8341	0.314171	9.00083		1.47544	100.141	0.299008	-98.6659		5.54934	82.9271	0.889425	-77.3777		27.3673	66.6981	3.3465	-39.3308		3.5			0.000486575	0.00046862	0.000451327	0.000471344	0.00045395	0.000437199	0.000421065	0.000405527	0.000390563	0.000408071	0.000393013	0.00037851	0.000364542	0.00035109
						3.52	3064.23	#REF!	11.5491	11.5	0	0	1.04217	63.8763	0.319381	9.32021		1.48955	102.647	0.284894	-101.158		5.59482	85.1413	0.843944	-79.5465		27.5575	68.6471	3.15625	-41.0895		3.52			0.000464851	0.000447697	0.000431176	0.000450096	0.000433486	0.00041749	0.000402084	0.000387246	0.000372956	0.000389497	0.000375124	0.000361281	0.000347949	0.000335109
						3.54	3088.82	#REF!	11.6147	11.5	0	0	1.04217	64.9184	0.324592	9.6448		1.50301	105.189	0.271435	-103.686		5.63795	87.3894	0.800812	-81.7514		27.7366	70.6292	2.97713	-42.8926		3.54			0.000444013	0.000427628	0.000411848	0.000429727	0.000413869	0.000398597	0.000383888	0.000369722	0.000356078	0.000371703	0.000357986	0.000344776	0.000332053	0.000319799
						3.56	3113.24	#REF!	11.6804	11.5	0	0	1.04217	65.9606	0.329803	9.97461		1.51584	107.765	0.258604	-106.249		5.67885	89.6714	0.759912	-83.9925		27.9053	72.6446	2.80851	-44.7394		3.56			0.000424038	0.000408391	0.00039332	0.000410213	0.000395076	0.000380497	0.000366456	0.000352933	0.000339909	0.000354665	0.000341577	0.000328972	0.000316833	0.000305141
						3.58	3137.47	#REF!	11.746	11.5	0	0	1.04217	67.0028	0.335014	10.3096		1.52808	110.377	0.246372	-108.849		5.71764	91.9873	0.721131	-86.2697		28.064	74.6935	2.64976	-46.6295		3.58			0.000404902	0.00038996	0.00037557	0.000391529	0.000377081	0.000363166	0.000349764	0.000336857	0.000324427	0.000338361	0.000325874	0.000313849	0.000302267	0.000291113
						3.6	3161.52	#REF!	11.8116	11.5	0	0	1.04217	68.045	0.340225	10.6498		1.53973	113.024	0.234713	-111.485		5.75441	94.3374	0.684361	-88.583		28.2135	76.7759	2.5003	-48.5625		3.6			0.000386577	0.000372312	0.000358573	0.000373647	0.000359859	0.00034658	0.00033379	0.000321473	0.00030961	0.000322766	0.000310855	0.000299384	0.000288336	0.000277696
						3.62	3185.4	#REF!	11.8772	11.5	0	0	1.04217	69.0871	0.345436	10.9953		1.55085	115.707	0.223601	-114.156		5.78927	96.7218	0.6495	-90.9325		28.3542	78.8921	2.3596	-50.5379		3.62			0.000369038	0.00035542	0.000342304	0.000356542	0.000343385	0.000330713	0.000318509	0.000306756	0.000295436	0.000307856	0.000296496	0.000285555	0.000275017	0.000264868
						3.64	3209.09	#REF!	11.9428	11.5	0	0	1.04217	70.1293	0.350647	11.3459		1.56144	118.426	0.213011	-116.864		5.82232	99.1404	0.61645	-93.3181		28.4866	81.042	2.22713	-52.5554		3.64			0.000352259	0.00033926	0.000326741	0.000340186	0.000327633	0.000315542	0.000303898	0.000292684	0.000281883	0.000293608	0.000282773	0.000272338	0.000262288	0.00025261
						3.66	3232.62	#REF!	12.0085	12	0	0	0.981437	71.1107	0.355554	11.7015		1.57153	121.18	0.202921	-119.608		5.85365	101.594	0.585116	-95.7399		28.6114	83.2259	2.1024	-54.6145		3.66			0.000336204	0.000323797	0.000311848	0.000324545	0.000312568	0.000301034	0.000289925	0.000279226	0.000268922	0.000279989	0.000269657	0.000259706	0.000250122	0.000240892
						3.68	3255.98	#REF!	12.0741	12	0	0	0.981437	72.0922	0.360461	12.0619		1.58114	123.97	0.193306	-122.389		5.88335	104.081	0.555413	-98.1978		28.7288	85.4439	1.98497	-56.7151		3.68			0.000320848	0.000309008	0.000297605	0.000309592	0.000298168	0.000287165	0.000276568	0.000266362	0.000256533	0.000266977	0.000257125	0.000247637	0.000238498	0.000229697
						3.7	3279.16	#REF!	12.1397	12	0	0	0.981437	73.0736	0.365368	12.4273		1.5903	126.796	0.184145	-125.206		5.91151	106.603	0.527254	-100.692		28.8394	87.6961	1.87439	-58.8567		3.7			0.000306166	0.000294868	0.000283987	0.000295305	0.000284407	0.000273912	0.000263804	0.000254069	0.000244694	0.00025455	0.000245157	0.00023611	0.000227397	0.000219006
						3.72	3302.18	#REF!	12.2053	12	0	0	0.981437	74.0551	0.370275	12.7976		1.59903	129.658	0.175418	-128.059		5.93821	109.161	0.500559	-103.222		28.9435	89.9826	1.77026	-61.0391		3.72			0.000292135	0.000281355	0.000270972	0.000281657	0.000271263	0.000261253	0.000251612	0.000242327	0.000233385	0.000242686	0.00023373	0.000225105	0.000216798	0.000208798
						3.74	3325.03	#REF!	12.2709	12	0	0	0.981437	75.0365	0.375182	13.1728		1.60734	132.556	0.167104	-130.949		5.96351	111.752	0.475253	-105.789		29.0416	92.3035	1.6722	-63.262		3.74			0.00027873	0.000268445	0.000258538	0.000268624	0.000258711	0.000249164	0.00023997	0.000231114	0.000222586	0.000231362	0.000222824	0.000214602	0.000206682	0.000199056
						3.76	3347.72	#REF!	12.3366	12	0	0	0.981437	76.0179	0.38009	13.5529		1.61526	135.49	0.159184	-133.875		5.9875	114.379	0.451263	-108.392		29.1339	94.6591	1.57985	-65.5252		3.76			0.000265927	0.000256114	0.000246663	0.000256182	0.000246729	0.000237624	0.000228855	0.00022041	0.000212277	0.000220557	0.000212418	0.00020458	0.00019703	0.00018976
						3.78	3370.24	#REF!	12.4022	12	0	0	0.981437	76.9994	0.384997	13.9379		1.62281	138.461	0.151639	-136.838		6.01025	117.041	0.428519	-111.031		29.2209	97.0493	1.49286	-67.8284		3.78			0.000253701	0.000244339	0.000235323	0.000244309	0.000235293	0.00022661	0.000218248	0.000210194	0.000202438	0.000210251	0.000202492	0.00019502	0.000187823	0.000180892
						3.8	3392.61	#REF!	12.4678	12	0	0	0.981437	77.9808	0.389904	14.3278		1.63	141.468	0.144452	-139.838		6.03181	119.738	0.406955	-113.706		29.3029	99.4744	1.41091	-70.1716		3.8			0.000242031	0.0002331	0.000224498	0.000232979	0.000224382	0.000216102	0.000208127	0.000200447	0.00019305	0.000200421	0.000193026	0.000185903	0.000179042	0.000172435
						3.82	3414.81	#REF!	12.5334	12.5	0	0	1.07357	79.0544	0.395272	14.723		1.63684	144.511	0.137605	-142.874		6.05226	122.471	0.38651	-116.418		29.3801	101.934	1.3337	-72.5544		3.82			0.0002309	0.000222379	0.000214173	0.000222178	0.000213979	0.000206083	0.000198478	0.000191154	0.0001841	0.000191055	0.000184005	0.000177215	0.000170675	0.000164377
						3.84	3436.86	#REF!	12.599	12.5	0	0	1.07357	80.1279	0.40064	15.1237		1.64336	147.591	0.131083	-145.947		6.07164	125.238	0.367124	-119.167		29.4528	104.43	1.26095	-74.9767		3.84			0.000220284	0.000212155	0.000204326	0.000211882	0.000204064	0.000196533	0.000189281	0.000182296	0.000175569	0.000182131	0.00017541	0.000168937	0.000162703	0.000156699
						3.86	3458.76	#REF!	12.6647	12.5	0	0	1.07357	81.2015	0.406008	15.5297		1.64958	150.707	0.124869	-149.058		6.09003	128.041	0.348739	-121.951		29.5214	106.96	1.19238	-77.4384		3.86			0.000210162	0.000202406	0.000194937	0.000202069	0.000194613	0.000187431	0.000180514	0.000173853	0.000167438	0.000173629	0.000167222	0.000161051	0.000155108	0.000149384
						3.88	3480.5	#REF!	12.7303	12.5	0	0	1.07357	82.2751	0.411375	15.9411		1.6555	153.861	0.118949	-152.205		6.10746	130.88	0.331303	-124.773		29.586	109.525	1.12776	-79.9394		3.88			0.00020051	0.000193111	0.000185985	0.000192717	0.000185605	0.000178756	0.00017216	0.000165807	0.000159688	0.00016553	0.000159422	0.000153539	0.000147873	0.000142416
						3.9	3502.09	#REF!	12.7959	12.5	0	0	1.07357	83.3486	0.416743	16.3578		1.66114	157.05	0.113309	-155.389		6.124	133.754	0.314764	-127.63		29.6469	112.126	1.06683	-82.4794		3.9			0.000191308	0.000184248	0.000177449	0.000183804	0.000177021	0.000170489	0.000164198	0.000158138	0.000152303	0.000157816	0.000151992	0.000146383	0.000140981	0.000135779
						3.92	3523.53	#REF!	12.8615	12.5	0	0	1.07357	84.4222	0.422111	16.7799		1.66651	160.277	0.107934	-158.611		6.13969	136.665	0.299077	-130.525		29.7044	114.763	1.00938	-85.0585		3.92			0.000182535	0.000175799	0.000169312	0.000175311	0.000168842	0.000162611	0.00015661	0.000150831	0.000145265	0.000150468	0.000144915	0.000139567	0.000134417	0.000129457
						3.94	3544.82	#REF!	12.9271	12.5	0	0	1.07357	85.4958	0.427479	17.2074		1.67163	163.541	0.102813	-161.87		6.15457	139.611	0.284194	-133.456		29.7586	117.435	0.955202	-87.6765		3.94			0.000174172	0.000167745	0.000161555	0.000167218	0.000161047	0.000155105	0.000149381	0.000143868	0.000138559	0.000143469	0.000138175	0.000133076	0.000128165	0.000123435
						3.96	3565.97	#REF!	12.9928	12.5	0	0	1.07357	86.5694	0.432847	17.6402		1.67651	166.842	0.0979326	-165.166		6.16869	142.592	0.270073	-136.424		29.8097	120.143	0.9041	-90.3333		3.96			0.0001662	0.000160067	0.000154161	0.000159507	0.000153621	0.000147952	0.000142492	0.000137234	0.00013217	0.000136803	0.000131755	0.000126893	0.00012221	0.0001177
						3.98	3586.97	#REF!	13.0584	13	0	0	1.41899	87.9883	0.439942	18.0802		1.68117	170.18	0.0932813	-168.499		6.18209	145.61	0.256672	-139.428		29.8579	122.887	0.855886	-93.0289		3.98			0.000158617	0.000152764	0.000147126	0.000152175	0.000146559	0.000141151	0.000135942	0.000130925	0.000126094	0.000130467	0.000125653	0.000121016	0.00011655	0.000112249
						4	3607.83	#REF!	13.124	13	0	0	1.41899	89.4073	0.447037	18.5272		1.6856	173.555	0.0888474	-171.87		6.19481	148.664	0.243952	-142.47		29.9034	125.667	0.810385	-95.7631		4			0.000151401	0.000145814	0.000140433	0.000145201	0.000139842	0.000134682	0.000129712	0.000124925	0.000120315	0.000124444	0.000119851	0.000115429	0.000111169	0.000107067
						4.02	3628.55	#REF!	13.1896	13	0	0	1.41899	90.8263	0.454132	18.9813		1.68983	176.968	0.0846202	-175.278		6.20689	151.755	0.231877	-145.548		29.9463	128.482	0.767434	-98.5361		4.02			0.000144534	0.000139201	0.000134064	0.000138566	0.000133453	0.000128528	0.000123785	0.000119217	0.000114818	0.000118716	0.000114335	0.000110116	0.000106052	0.000102139
						4.04	3649.13	#REF!	13.2552	13	0	0	1.41899	92.2453	0.461227	19.4426		1.69386	180.418	0.0805893	-178.724		6.21836	154.881	0.22041	-148.663		29.9869	131.335	0.726878	-101.348		4.04			0.000137998	0.000132906	0.000128001	0.000132254	0.000127374	0.000122673	0.000118146	0.000113787	0.000109588	0.000113268	0.000109088	0.000105063	0.000101186	9.74518e-05
						4.06	3669.57	#REF!	13.3209	13	0	0	1.41899	93.6643	0.468322	19.9109		1.6977	183.906	0.0767452	-182.208		6.22925	158.045	0.20952	-151.815		30.0252	134.223	0.688575	-104.198		4.06			0.000131775	0.000126913	0.000122229	0.000126247	0.000121588	0.000117101	0.00011278	0.000108618	0.00010461	0.000108086	0.000104097	0.000100256	9.65564e-05	9.29932e-05
						4.08	3689.88	#REF!	13.3865	13	0	0	1.41899	95.0833	0.475417	20.3863		1.70137	187.431	0.0730785	-185.729		6.23959	161.244	0.199175	-155.005		30.0614	137.148	0.65239	-107.086		4.08			0.00012585	0.000121206	0.000116733	0.00012053	0.000116082	0.000111798	0.000107673	0.000103699	9.98726e-05	0.000103155	9.93489e-05	9.56827e-05	9.21518e-05	8.87513e-05
						4.1	3710.05	#REF!	13.4521	13	0	0	1.41899	96.5023	0.482511	20.8688		1.70487	190.993	0.0695806	-189.288		6.24942	164.48	0.189346	-158.231		30.0956	140.109	0.618198	-110.014		4.1			0.000120208	0.000115772	0.000111499	0.000115087	0.00011084	0.00010675	0.00010281	9.90164e-05	9.53625e-05	9.84637e-05	9.48302e-05	9.13308e-05	8.79605e-05	8.47146e-05
						4.12	3730.09	#REF!	13.5177	13.5	0	0	1.24162	97.7439	0.48872	21.3575		1.7082	194.594	0.0662434	-192.886		6.25876	167.753	0.180006	-161.495		30.1279	143.107	0.585882	-112.979		4.12			0.000114828	0.000110591	0.00010651	0.0001099	0.000105844	0.000101938	9.81766e-05	9.45537e-05	9.10645e-05	9.39943e-05	9.05257e-05	8.71851e-05	8.39678e-05	8.08693e-05
						4.14	3750	#REF!	13.5833	13.5	0	0	1.24162	98.9855	0.494928	21.8525		1.71139	198.232	0.0630592	-196.521		6.26764	171.063	0.171129	-164.795		30.1584	146.142	0.555334	-115.984		4.14			0.000109699	0.000105651	0.000101753	0.000104956	0.000101083	9.73531e-05	9.37606e-05	9.03007e-05	8.69684e-05	8.97365e-05	8.6425e-05	8.32358e-05	8.01642e-05	7.7206e-05
						4.16	3769.77	#REF!	13.649	13.5	0	0	1.24162	100.227	0.501136	22.3536		1.71443	201.908	0.0600206	-200.194		6.27607	174.41	0.162692	-168.134		30.1873	149.214	0.52645	-119.026		4.16			0.000104809	0.000100942	9.72167e-05	0.000100245	9.65458e-05	9.2983e-05	8.95518e-05	8.62472e-05	8.30645e-05	8.56799e-05	8.25182e-05	7.94731e-05	7.65404e-05	7.37159e-05
						4.18	3789.43	#REF!	13.7146	13.5	0	0	1.24162	101.469	0.507344	22.8609		1.71733	205.623	0.0571207	-203.905		6.2841	177.793	0.154672	-171.509		30.2146	152.322	0.499136	-122.108		4.18			0.000100147	9.6451e-05	9.28918e-05	9.57543e-05	9.22208e-05	8.88176e-05	8.55401e-05	8.23835e-05	7.93434e-05	8.18149e-05	7.87958e-05	7.58881e-05	7.30877e-05	7.03906e-05
						4.2	3808.95	#REF!	13.7802	13.5	0	0	1.24162	102.71	0.513552	23.3745		1.72009	209.375	0.0543528	-207.655		6.29172	181.214	0.147045	-174.922		30.2405	155.468	0.473299	-125.228		4.2			9.57003e-05	9.21688e-05	8.87676e-05	9.14736e-05	8.80981e-05	8.48471e-05	8.17161e-05	7.87006e-05	7.57964e-05	7.81321e-05	7.52489e-05	7.2472e-05	6.97977e-05	6.7222e-05
						4.22	3828.35	#REF!	13.8458	13.5	0	0	1.24162	103.952	0.51976	23.8943		1.72274	213.165	0.0517107	-211.443		6.29897	184.672	0.139794	-178.373		30.2649	158.651	0.448857	-128.386		4.22			9.14602e-05	8.80851e-05	8.48346e-05	8.73929e-05	8.4168e-05	8.1062e-05	7.80707e-05	7.51897e-05	7.24151e-05	7.46226e-05	7.18689e-05	6.92168e-05	6.66626e-05	6.42026e-05
						4.24	3847.62	#REF!	13.9114	13.5	0	0	1.24162	105.194	0.525968	24.4202		1.72526	216.994	0.0491883	-215.269		6.30587	188.167	0.132897	-181.861		30.288	161.871	0.425727	-131.583		4.24			8.74163e-05	8.41904e-05	8.10837e-05	8.35025e-05	8.04211e-05	7.74534e-05	7.45953e-05	7.18426e-05	6.91914e-05	7.1278e-05	6.86477e-05	6.61145e-05	6.36747e-05	6.1325e-05
						4.26	3866.78	#REF!	13.9771	13.5	0	0	1.24162	106.435	0.532176	24.9524		1.72767	220.861	0.04678	-219.134		6.31243	191.699	0.126336	-185.387		30.3099	165.129	0.403837	-134.819		4.26			8.35593e-05	8.04758e-05	7.75061e-05	7.97933e-05	7.68488e-05	7.40129e-05	7.12817e-05	6.86513e-05	6.61179e-05	6.80903e-05	6.55777e-05	6.31577e-05	6.08271e-05	5.85825e-05
						4.28	3885.81	#REF!	14.0427	14	0	0	1.58459	108.02	0.540099	25.4925		1.72997	224.767	0.0444802	-223.037		6.31867	195.269	0.120094	-188.951		30.3307	168.424	0.383113	-138.093		4.28			7.98857e-05	7.69378e-05	7.40986e-05	7.62617e-05	7.34475e-05	7.07371e-05	6.81268e-05	6.56128e-05	6.31916e-05	6.50564e-05	6.26557e-05	6.03436e-05	5.81168e-05	5.59721e-05
						4.3	3904.73	#REF!	14.1083	14	0	0	1.58459	109.604	0.548022	26.0405		1.73216	228.711	0.0422837	-226.979		6.32461	198.877	0.114155	-192.552		30.3503	171.756	0.363489	-141.406		4.3			7.6386e-05	7.35672e-05	7.08524e-05	7.28984e-05	7.02083e-05	6.76175e-05	6.51223e-05	6.27191e-05	6.04047e-05	6.2168e-05	5.98739e-05	5.76644e-05	5.55365e-05	5.34871e-05
						4.32	3923.52	#REF!	14.1739	14	0	0	1.58459	111.189	0.555945	26.5965		1.73426	232.693	0.0401854	-230.959		6.33027	202.522	0.108501	-196.192		30.3689	175.127	0.344902	-144.758		4.32			7.30511e-05	7.03554e-05	6.77592e-05	6.96946e-05	6.71228e-05	6.46458e-05	6.22603e-05	5.99627e-05	5.775e-05	5.94176e-05	5.7225e-05	5.51133e-05	5.30795e-05	5.11208e-05
						4.34	3942.2	#REF!	14.2395	14	0	0	1.58459	112.774	0.563868	27.1603		1.73627	236.715	0.0381806	-234.978		6.33565	206.205	0.103119	-199.869		30.3865	178.535	0.327292	-148.148		4.34			6.98728e-05	6.72943e-05	6.48111e-05	6.66423e-05	6.4183e-05	6.18146e-05	5.95335e-05	5.73366e-05	5.52208e-05	5.67981e-05	5.47021e-05	5.26835e-05	5.07394e-05	4.8867e-05
						4.36	3960.77	#REF!	14.3052	14	0	0	1.58459	114.358	0.571791	27.7321		1.73818	240.775	0.0362649	-239.036		6.34077	209.925	0.0979942	-203.584		30.4032	181.981	0.310603	-151.578		4.36			6.68429e-05	6.43763e-05	6.20007e-05	6.37335e-05	6.13816e-05	5.91165e-05	5.6935e-05	5.4834e-05	5.28105e-05	5.43026e-05	5.22988e-05	5.03688e-05	4.85101e-05	4.672e-05
						4.38	3979.22	#REF!	14.3708	14	0	0	1.58459	115.943	0.579714	28.3118		1.74001	244.873	0.034434	-243.133		6.34565	213.684	0.0931135	-207.338		30.419	185.465	0.294785	-155.046		4.38			6.39541e-05	6.1594e-05	5.93211e-05	6.0961e-05	5.87114e-05	5.65448e-05	5.44582e-05	5.24486e-05	5.05132e-05	5.19249e-05	5.00088e-05	4.81634e-05	4.6386e-05	4.46743e-05
						4.4	3997.56	#REF!	14.4364	14	0	0	1.58459	117.527	0.587637	28.8995		1.74176	249.011	0.0326838	-247.269		6.3503	217.48	0.0884644	-211.13		30.434	188.987	0.279787	-158.553		4.4			6.11991e-05	5.89407e-05	5.67657e-05	5.83179e-05	5.61658e-05	5.40932e-05	5.20971e-05	5.01746e-05	4.8323e-05	4.96589e-05	4.78264e-05	4.60615e-05	4.43617e-05	4.27247e-05
						4.42	4015.79	#REF!	14.502	14.5	0	0	1.14431	118.672	0.593359	29.4928		1.74344	253.188	0.0310106	-251.444		6.35473	221.315	0.0840353	-214.96		30.4482	192.548	0.265565	-162.099		4.42			5.85669e-05	5.64057e-05	5.43242e-05	5.57934e-05	5.37345e-05	5.17516e-05	4.98419e-05	4.80026e-05	4.62313e-05	4.74954e-05	4.57427e-05	4.40547e-05	4.2429e-05	4.08633e-05
						4.44	4033.91	#REF!	14.5676	14.5	0	0	1.14431	119.816	0.59908	30.0919		1.74504	257.404	0.0294111	-255.659		6.35895	225.187	0.0798154	-218.828		30.4617	196.146	0.252076	-165.685		4.44			5.60521e-05	5.39836e-05	5.19915e-05	5.33823e-05	5.14124e-05	4.95152e-05	4.7688e-05	4.59282e-05	4.42334e-05	4.54297e-05	4.37532e-05	4.21386e-05	4.05836e-05	3.9086e-05
						4.46	4051.92	#REF!	14.6333	14.5	0	0	1.14431	120.96	0.604802	30.6967		1.74657	261.659	0.0278816	-259.912		6.36297	229.098	0.0757943	-222.735		30.4745	199.783	0.239282	-169.309		4.46			5.36492e-05	5.16695e-05	4.97628e-05	5.10793e-05	4.91944e-05	4.73791e-05	4.56307e-05	4.39468e-05	4.23251e-05	4.34573e-05	4.18536e-05	4.03091e-05	3.88217e-05	3.73891e-05
						4.48	4069.82	#REF!	14.6989	14.5	0	0	1.14431	122.105	0.610523	31.3072		1.74803	265.953	0.0264192	-264.205		6.3668	233.047	0.0719622	-226.681		30.4866	203.459	0.227143	-172.972		4.48			5.13533e-05	4.94583e-05	4.76332e-05	4.88796e-05	4.70759e-05	4.53387e-05	4.36656e-05	4.20543e-05	4.05024e-05	4.1574e-05	4.00398e-05	3.85623e-05	3.71392e-05	3.57687e-05
						4.5	4087.62	#REF!	14.7645	14.5	0	0	1.14431	123.249	0.616245	31.9235		1.74943	270.286	0.0250206	-268.537		6.37046	237.035	0.0683097	-230.665		30.4981	207.173	0.215625	-176.675		4.5			4.91596e-05	4.73455e-05	4.55984e-05	4.67784e-05	4.50522e-05	4.33897e-05	4.17886e-05	4.02465e-05	3.87613e-05	3.97756e-05	3.83078e-05	3.68942e-05	3.55327e-05	3.42215e-05
						4.52	4105.31	#REF!	14.8301	14.5	0	0	1.14431	124.393	0.621966	32.5455		1.75076	274.659	0.0236831	-272.909		6.37394	241.061	0.0648281	-234.687		30.5091	210.926	0.204693	-180.417		4.52			4.70634e-05	4.53266e-05	4.3654e-05	4.47713e-05	4.31192e-05	4.1528e-05	3.99955e-05	3.85196e-05	3.70982e-05	3.80583e-05	3.66538e-05	3.53012e-05	3.39986e-05	3.2744e-05
						4.54	4122.9	#REF!	14.8957	14.5	0	0	1.14431	125.538	0.627688	33.1731		1.75204	279.072	0.0224038	-277.32		6.37726	245.126	0.0615089	-238.749		30.5195	214.718	0.194317	-184.198		4.54			4.50602e-05	4.33974e-05	4.1796e-05	4.28539e-05	4.12725e-05	3.97495e-05	3.82827e-05	3.687e-05	3.55094e-05	3.64183e-05	3.50744e-05	3.37801e-05	3.25335e-05	3.1333e-05
						4.56	4140.39	#REF!	14.9614	14.5	0	0	1.14431	126.682	0.633409	33.8066		1.75327	283.524	0.02118	-281.771		6.38042	249.229	0.0583442	-242.849		30.5293	218.548	0.184467	-188.019		4.56			4.3146e-05	4.15538e-05	4.00204e-05	4.10222e-05	3.95084e-05	3.80505e-05	3.66464e-05	3.5294e-05	3.39916e-05	3.4852e-05	3.35659e-05	3.23273e-05	3.11343e-05	2.99854e-05
						4.58	4157.78	#REF!	15.027	15	0	0	1.17023	127.852	0.639261	34.4458		1.75444	288.015	0.0200093	-286.261		6.38344	253.371	0.0553263	-246.988		30.5387	222.418	0.175114	-191.879		4.58			4.13167e-05	3.97921e-05	3.83237e-05	3.92724e-05	3.78232e-05	3.64274e-05	3.50832e-05	3.37885e-05	3.25417e-05	3.33563e-05	3.21254e-05	3.09399e-05	2.97982e-05	2.86986e-05
						4.6	4175.07	#REF!	15.0926	15	0	0	1.17023	129.022	0.645112	35.0909		1.75556	292.547	0.0188892	-290.791		6.38632	257.552	0.0524481	-251.166		30.5475	218.385	0.166231	-187.838		4.6			3.95686e-05	3.81084e-05	3.67022e-05	3.76007e-05	3.62132e-05	3.48768e-05	3.35898e-05	3.23503e-05	3.11565e-05	3.19278e-05	3.07496e-05	2.96149e-05	2.8522e-05	2.74695e-05
						4.62	4192.25	#REF!	15.1582	15	0	0	1.17023	130.193	0.650963	35.7419		1.75663	297.118	0.0178175	-295.361		6.38906	261.772	0.0497028	-255.383		30.556	222.194	0.157794	-191.638		4.62			3.78979e-05	3.64994e-05	3.51525e-05	3.60035e-05	3.46749e-05	3.33954e-05	3.2163e-05	3.09761e-05	2.9833e-05	3.05634e-05	2.94356e-05	2.83493e-05	2.73032e-05	2.62956e-05
						4.64	4209.35	#REF!	15.2238	15	0	0	1.17023	131.363	0.656814	36.3987		1.75766	301.729	0.0167919	-299.971		6.39168	266.031	0.0470839	-259.64		30.564	226.041	0.149779	-195.478		4.64			3.63011e-05	3.49615e-05	3.36714e-05	3.44775e-05	3.32052e-05	3.19798e-05	3.07997e-05	2.96632e-05	2.85685e-05	2.92601e-05	2.81804e-05	2.71405e-05	2.61389e-05	2.51744e-05
						4.66	4226.34	#REF!	15.2895	15	0	0	1.17023	132.533	0.662665	37.0614		1.75864	306.38	0.0158103	-304.621		6.39418	270.329	0.0445852	-263.935		30.5716	229.927	0.142163	-199.355		4.66			3.47749e-05	3.34916e-05	3.22557e-05	3.30193e-05	3.18008e-05	3.06273e-05	2.94971e-05	2.84086e-05	2.73602e-05	2.80152e-05	2.69814e-05	2.59857e-05	2.50268e-05	2.41033e-05
						4.68	4243.24	#REF!	15.3551	15	0	0	1.17023	133.703	0.668516	37.7299		1.75958	311.071	0.0148708	-309.312		6.39657	274.666	0.042201	-268.27		30.5788	233.85	0.134926	-203.271		4.68			3.33159e-05	3.20865e-05	3.09025e-05	3.16258e-05	3.04587e-05	2.93347e-05	2.82522e-05	2.72097e-05	2.62056e-05	2.68259e-05	2.5836e-05	2.48826e-05	2.39644e-05	2.308e-05
						4.7	4260.05	#REF!	15.4207	15	0	0	1.17023	134.873	0.674367	38.4042		1.76048	315.802	0.0139715	-314.042		6.39884	279.043	0.0399256	-272.644		30.5857	237.811	0.128046	-207.225		4.7			3.19212e-05	3.07433e-05	2.96088e-05	3.02941e-05	2.91761e-05	2.80995e-05	2.70626e-05	2.60639e-05	2.51021e-05	2.56896e-05	2.47417e-05	2.38286e-05	2.29493e-05	2.21024e-05
						4.72	4276.76	#REF!	15.4863	15	0	0	1.17023	136.044	0.680218	39.0845		1.76134	320.574	0.0131106	-318.812		6.40101	283.459	0.0377538	-277.058		30.5923	241.811	0.121507	-211.219		4.72			3.05879e-05	2.94591e-05	2.8372e-05	2.90213e-05	2.79503e-05	2.69189e-05	2.59255e-05	2.49688e-05	2.40474e-05	2.4604e-05	2.36961e-05	2.28216e-05	2.19795e-05	2.11684e-05
						4.74	4293.38	#REF!	15.5519	15.5	0	0	1.97437	138.018	0.69009	39.7746		1.76216	325.385	0.0122862	-323.623		6.40309	287.914	0.0356805	-281.511		30.5985	245.849	0.115288	-215.25		4.74			2.9316e-05	2.82342e-05	2.71923e-05	2.78075e-05	2.67813e-05	2.57931e-05	2.48413e-05	2.39246e-05	2.30417e-05	2.3569e-05	2.26992e-05	2.18616e-05	2.10548e-05	2.02779e-05
						4.76	4309.91	#REF!	15.6176	15.5	0	0	1.97437	139.992	0.699962	40.4745		1.76295	330.237	0.0114966	-328.474		6.40507	292.409	0.0337007	-286.004		30.6044	249.925	0.109373	-219.321		4.76			2.81024e-05	2.70654e-05	2.60666e-05	2.66497e-05	2.56663e-05	2.47192e-05	2.3807e-05	2.29284e-05	2.20823e-05	2.25819e-05	2.17486e-05	2.09461e-05	2.01731e-05	1.94287e-05
						4.78	4326.35	#REF!	15.6832	15.5	0	0	1.97437	141.967	0.709834	41.1844		1.76371	335.13	0.0107403	-333.366		6.40696	296.943	0.0318097	-290.536		30.61	254.04	0.103746	-223.43		4.78			2.69442e-05	2.59499e-05	2.49923e-05	2.5545e-05	2.46024e-05	2.36945e-05	2.28201e-05	2.1978e-05	2.1167e-05	2.16404e-05	2.08419e-05	2.00728e-05	1.9332e-05	1.86187e-05
						4.8	4342.7	#REF!	15.7488	15.5	0	0	1.97437	143.941	0.719706	41.9041		1.76443	340.063	0.0100157	-338.298		6.40876	301.517	0.0300033	-295.108		30.6154	258.194	0.0983909	-227.578		4.8			2.58385e-05	2.4885e-05	2.39667e-05	2.44907e-05	2.35869e-05	2.27165e-05	2.18782e-05	2.10709e-05	2.02933e-05	2.07421e-05	1.99767e-05	1.92395e-05	1.85295e-05	1.78458e-05
						4.82	4358.96	#REF!	15.8144	15.5	0	0	1.97437	145.916	0.729578	42.6336		1.76513	345.036	0.00932127	-343.271		6.41049	306.131	0.0282771	-299.72		30.6205	262.386	0.0932933	-231.765		4.82			2.47826e-05	2.38681e-05	2.29873e-05	2.34842e-05	2.26175e-05	2.17829e-05	2.09791e-05	2.02049e-05	1.94593e-05	1.98848e-05	1.9151e-05	1.84443e-05	1.77636e-05	1.71081e-05
						4.84	4375.13	#REF!	15.88	15.5	0	0	1.97437	147.89	0.739449	43.3731		1.76579	350.05	0.0086557	-348.285		6.41214	310.784	0.0266274	-304.372		30.6253	266.617	0.0884399	-235.992		4.84			2.37741e-05	2.28968e-05	2.20519e-05	2.2523e-05	2.16919e-05	2.08914e-05	2.01205e-05	1.9378e-05	1.86629e-05	1.90663e-05	1.83627e-05	1.76851e-05	1.70325e-05	1.64039e-05
						4.86	4391.22	#REF!	15.9457	15.5	0	0	1.97437	149.864	0.749321	44.1224		1.76643	355.105	0.00801767	-353.339		6.41372	315.478	0.0250504	-309.064		30.63	270.887	0.0838177	-240.257		4.86			2.28106e-05	2.19689e-05	2.11582e-05	2.1605e-05	2.08078e-05	2.00399e-05	1.93004e-05	1.85882e-05	1.79023e-05	1.82847e-05	1.761e-05	1.69602e-05	1.63343e-05	1.57315e-05
						4.88	4407.23	#REF!	16.0113	16	0	0	0.733097	150.597	0.752987	44.8754		1.76704	360.201	0.007406	-358.434		6.41522	320.211	0.0235429	-313.796		30.6344	275.196	0.0794154	-244.561		4.88			2.18868e-05	2.10792e-05	2.03013e-05	2.07251e-05	1.99604e-05	1.92238e-05	1.85144e-05	1.78312e-05	1.71732e-05	1.75359e-05	1.68888e-05	1.62655e-05	1.56653e-05	1.50872e-05
						4.9	4423.14	#REF!	16.0769	16	0	0	0.733097	151.33	0.756652	45.632		1.76763	365.338	0.00681958	-363.57		6.41667	324.985	0.0221015	-318.568		30.6385	279.543	0.075222	-248.905		4.9			2.10012e-05	2.02262e-05	1.94799e-05	1.98818e-05	1.91482e-05	1.84416e-05	1.7761e-05	1.71056e-05	1.64744e-05	1.68183e-05	1.61977e-05	1.56e-05	1.50243e-05	1.44699e-05
						4.92	4438.98	#REF!	16.1425	16	0	0	0.733097	152.064	0.760318	46.3924		1.76819	370.515	0.00625735	-368.747		6.41804	329.799	0.0207235	-323.381		30.6425	283.93	0.0712273	-253.288		4.92			2.01522e-05	1.94086e-05	1.86923e-05	1.90736e-05	1.83698e-05	1.76919e-05	1.7039e-05	1.64102e-05	1.58047e-05	1.61308e-05	1.55356e-05	1.49623e-05	1.44101e-05	1.38784e-05
						4.94	4454.73	#REF!	16.2081	16	0	0	0.733097	152.797	0.763983	47.1563		1.76873	375.734	0.00571827	-373.965		6.41936	334.653	0.0194058	-328.233		30.6463	288.357	0.0674214	-257.71		4.94			1.93383e-05	1.86247e-05	1.79374e-05	1.8299e-05	1.76238e-05	1.69734e-05	1.63471e-05	1.57438e-05	1.51628e-05	1.54721e-05	1.49012e-05	1.43513e-05	1.38217e-05	1.33116e-05
						4.96	4470.41	#REF!	16.2738	16	0	0	0.733097	153.53	0.767649	47.924		1.76925	380.994	0.00520138	-379.224		6.42062	339.547	0.0181457	-333.126		30.65	292.822	0.0637951	-262.172		4.96			1.85582e-05	1.78733e-05	1.72138e-05	1.75567e-05	1.69089e-05	1.62849e-05	1.56839e-05	1.51052e-05	1.45478e-05	1.4841e-05	1.42934e-05	1.37659e-05	1.32579e-05	1.27687e-05
						4.98	4486	#REF!	16.3394	16	0	0	0.733097	154.263	0.771314	48.6953		1.76974	386.294	0.00470572	-384.525		6.42183	344.482	0.0169407	-338.06		30.6534	297.327	0.0603394	-266.673		4.98			1.78103e-05	1.71531e-05	1.65201e-05	1.68454e-05	1.62237e-05	1.56251e-05	1.50485e-05	1.44931e-05	1.39583e-05	1.42364e-05	1.37111e-05	1.32051e-05	1.27178e-05	1.22485e-05
						5	4501.51	#REF!	16.405	16	0	0	0.733097	154.996	0.77498	49.4703		1.77022	391.637	0.00423041	-389.866		6.42298	349.457	0.0157882	-343.034		30.6567	301.871	0.0570459	-271.214		5			1.70934e-05	1.64627e-05	1.58552e-05	1.61637e-05	1.55672e-05	1.49927e-05	1.44395e-05	1.39066e-05	1.33935e-05	1.36572e-05	1.31532e-05	1.26678e-05	1.22004e-05	1.17501e-05
						5.02	4516.94	#REF!	16.4706	16	0	0	0.733097	155.729	0.778645	50.2489		1.77067	397.02	0.00377457	-395.25		6.42408	354.472	0.0146859	-348.048		30.6599	306.455	0.0539068	-275.795		5.02			1.64063e-05	1.58009e-05	1.52178e-05	1.55104e-05	1.49381e-05	1.43868e-05	1.38559e-05	1.33446e-05	1.28522e-05	1.31022e-05	1.26187e-05	1.21531e-05	1.17046e-05	1.12727e-05
						5.04	4532.3	#REF!	16.5362	16.5	0	0	2.35468	158.084	0.790419	51.0394		1.77111	402.445	0.00333731	-400.674		6.42514	359.529	0.0136313	-353.104		30.6629	311.079	0.0509139	-280.416		5.04			1.57502e-05	1.51689e-05	1.46092e-05	1.48868e-05	1.43374e-05	1.38083e-05	1.32988e-05	1.2808e-05	1.23354e-05	1.25726e-05	1.21086e-05	1.16618e-05	1.12315e-05	1.0817e-05
						5.06	4547.57	#REF!	16.6019	16.5	0	0	2.35468	160.438	0.802192	51.8415		1.77153	407.912	0.00291779	-406.14		6.42614	364.626	0.0126221	-358.2		30.6657	315.742	0.0480597	-285.076		5.06			1.51234e-05	1.45653e-05	1.40278e-05	1.42912e-05	1.37638e-05	1.32559e-05	1.27668e-05	1.22956e-05	1.18419e-05	1.20669e-05	1.16216e-05	1.11928e-05	1.07797e-05	1.03819e-05
						5.08	4562.77	#REF!	16.6675	16.5	0	0	2.35468	162.793	0.813965	52.6555		1.77193	413.42	0.00251521	-411.648		6.42711	369.764	0.0116561	-363.337		30.6684	320.445	0.045337	-289.776		5.08			1.45246e-05	1.39886e-05	1.34724e-05	1.37223e-05	1.32159e-05	1.27282e-05	1.22585e-05	1.18062e-05	1.13705e-05	1.1584e-05	1.11565e-05	1.07448e-05	1.03483e-05	9.96645e-06
						5.1	4577.9	#REF!	16.7331	16.5	0	0	2.35468	165.148	0.825739	53.4812		1.77232	418.969	0.00212878	-417.197		6.42804	374.942	0.0107312	-368.514		30.671	325.188	0.0427392	-294.517		5.1			1.39522e-05	1.34374e-05	1.29415e-05	1.31787e-05	1.26924e-05	1.2224e-05	1.17729e-05	1.13385e-05	1.09201e-05	1.11226e-05	1.07122e-05	1.03169e-05	9.93619e-06	9.56952e-06
						5.12	4592.95	#REF!	16.7987	16.5	0	0	2.35468	167.502	0.837512	54.3188		1.77269	424.561	0.00175781	-422.788		6.42892	380.162	0.00984563	-373.733		30.6735	329.971	0.0402597	-299.297		5.12			1.34051e-05	1.29104e-05	1.2434e-05	1.26591e-05	1.2192e-05	1.17421e-05	1.13088e-05	1.08915e-05	1.04895e-05	1.06818e-05	1.02876e-05	9.90798e-06	9.54236e-06	9.19023e-06
						5.14	4607.93	#REF!	16.8643	16.5	0	0	2.35468	169.857	0.849286	55.168		1.77305	430.194	0.00140159	-428.421		6.42977	385.423	0.00899738	-378.993		30.6759	334.793	0.0378928	-304.118		5.14			1.28818e-05	1.24064e-05	1.19486e-05	1.21624e-05	1.17136e-05	1.12813e-05	1.0865e-05	1.04641e-05	1.00779e-05	1.02604e-05	9.88178e-06	9.51712e-06	9.16592e-06	8.82768e-06
						5.16	4622.83	#REF!	16.93	16.5	0	0	2.35468	172.212	0.861059	56.0291		1.77339	435.869	0.00105947	-434.096		6.43058	390.724	0.00818476	-384.294		30.6781	339.656	0.0356327	-308.978		5.16			1.23813e-05	1.19244e-05	1.14843e-05	1.16873e-05	1.1256e-05	1.08406e-05	1.04406e-05	1.00553e-05	9.68427e-06	9.85751e-06	9.49375e-06	9.14341e-06	8.806e-06	8.48105e-06
						5.18	4637.66	#REF!	16.9956	16.5	0	0	2.35468	174.567	0.872833	56.9019		1.77368	441.586	0.000765238	-439.812		6.43136	396.067	0.00740609	-389.636		30.6803	344.56	0.0334741	-313.879		5.18			0	0	0	1.12329e-05	1.08183e-05	1.04191e-05	1.00346e-05	9.66434e-06	9.30771e-06	9.4722e-06	9.12265e-06	8.78601e-06	8.46179e-06	8.14953e-06
						5.2	4652.42	#REF!	17.0612	17	0	0	2.32989	176.896	0.884482	57.7864		1.77391	447.345	0.000541675	-445.571		6.43211	401.452	0.00665981	-395.02		30.6824	349.503	0.031412	-318.821		5.2			0	0	0	0	0	0	0	0	0	9.10358e-06	8.76764e-06	8.44409e-06	8.13249e-06	7.83239e-06
						5.22	4667.11	#REF!	17.1268	17	0	0	2.32989	179.226	0.896131	58.6826		1.77407	453.146	0.000374792	-451.372		6.43282	406.877	0.00594443	-400.444		30.6843	354.487	0.0294415	-323.803		5.22			0	0	0	0	0	0	0	0	0	0	0	0	0	0
						5.24	4681.72	#REF!	17.1924	17	0	0	2.32989	181.556	0.907781	59.5903		1.77419	458.989	0.000253279	-457.215		6.43351	412.344	0.00525854	-405.911		30.6862	359.511	0.0275583	-328.825		5.24			0	0	0	0	0	0	0	0	0	0	0	0	0	0
						5.26	4696.27	#REF!	17.2581	17	0	0	2.32989	183.886	0.91943	60.5098		1.77429	464.875	0.000158285	-463.1		6.43417	417.852	0.00460079	-411.418		30.688	364.576	0.0257581	-333.888		5.26			0	0	0	0	0	0	0	0	0	0	0	0	0	0
						5.28	4710.75	#REF!	17.3237	17	0	0	2.32989	186.216	0.93108	61.4408		1.77436	470.802	9.03343e-05	-469.028		6.4348	423.402	0.00396992	-416.968		30.6897	369.682	0.0240367	-338.992		5.28			0	0	0	0	0	0	0	0	0	0	0	0	0	0
						5.3	4725.16	#REF!	17.3893	17	0	0	2.32989	188.546	0.942729	62.3836		1.7744	476.772	4.46627e-05	-474.998		6.4354	428.994	0.00336471	-422.559		30.6914	374.828	0.0223905	-344.137		5.3			0	0	0	0	0	0	0	0	0	0	0	0	0	0
						5.32	4739.5	#REF!	17.4549	17	0	0	2.32989	190.876	0.954379	63.338		1.77443	482.785	1.72824e-05	-481.011		6.43598	434.627	0.00278401	-428.191		30.693	380.015	0.0208159	-349.322		5.32			0	0	0	0	0	0	0	0	0	0	0	0	0	0
						5.34	4753.78	#REF!	17.5205	17.5	0	0	1.78437	192.66	0.963301	64.3013		1.77444	488.84	2.2853e-06	-487.066		6.43654	440.302	0.00222676	-433.866		30.6945	385.243	0.0193094	-354.548		5.34			0	0	0	0	0	0	0	0	0	0	0	0	0	0
						5.36	4767.99	#REF!	17.5862	17.5	0	0	1.78437	194.444	0.972222	65.2735		1.77445	494.938	0	-493.163		6.43707	446.019	0.00169194	-439.582		30.6959	390.511	0.0178679	-359.815		5.36			0	0	0	0	0	0	0	0	0	0	0	0	0	0
						5.38	4782.13	#REF!	17.6518	17.5	0	0	1.78437	196.229	0.981144	66.2546		1.77445	501.078	0	-499.304		6.43752	451.778	0.00124591	-445.341		30.6973	395.821	0.0164884	-365.124		5.38			0	0	0	0	0	0	0	0	0	0	0	0	0	0
						5.4	4796.21	#REF!	17.7174	17.5	0	0	1.78437	198.013	0.990066	67.2447		1.77445	507.261	0	-505.487		6.43789	457.579	0.000876583	-451.141		30.6986	401.172	0.015168	-370.473		5.4			0	0	0	0	0	0	0	0	0	0	0	0	0	0
						5.42	4810.23	#REF!	17.783	17.5	0	0	1.78437	199.798	0.998988	68.2437		1.77445	513.487	0	-511.712		6.43818	463.422	0.000583847	-456.984		30.6999	406.564	0.013904	-375.864		5.42			0	0	0	0	0	0	0	0	0	0	0	0	0	0
						5.44	4824.18	#REF!	17.8486	17.5	0	0	1.78437	201.582	1.00791	69.2516		1.77445	519.756	0	-517.981		6.43843	469.307	0.000337113	-462.868		30.7011	411.997	0.0126938	-381.296		5.44			0	0	0	0	0	0	0	0	0	0	0	0	0	0
						5.46	4838.07	#REF!	17.9143	17.5	0	0	1.78437	203.366	1.01683	70.2684		1.77445	526.067	0	-524.293		6.43862	475.234	0.000148314	-468.796		30.7022	417.471	0.0115349	-386.769		5.46			0	0	0	0	0	0	0	0	0	0	0	0	0	0
						5.48	4851.9	#REF!	17.9799	17.5	0	0	1.78437	205.151	1.02575	71.2942		1.77445	532.422	0	-530.647		6.43877	481.204	0	-474.765		30.7033	422.987	0.010425	-392.284		5.48			0	0	0	0	0	0	0	0	0	0	0	0	0	0
						5.5	4865.66	#REF!	18.0455	18	0	0	0	205.151	1.02575	72.3199												30.7045	428.544	0.00929908	-397.84		5.5			0	0	0	0	0	0	0	0	0	0	0	0	0	0
						5.52	4879.37	#REF!	18.1111	18	0	0	0	205.151	1.02575	73.3457												30.7055	434.143	0.00822096	-403.438		5.52
						5.54	4893.01	#REF!	18.1767	18	0	0	0	205.151	1.02575	74.3714												30.7066	439.784	0.00718855	-409.077		5.54
						5.56	4906.59	#REF!	18.2424	18	0	0	0	205.151	1.02575	75.3972												30.7076	445.466	0.00619988	-414.758		5.56
						5.58	4920.12	#REF!	18.308	18	0	0	0	205.151	1.02575	76.4229												30.7085	451.19	0.00525305	-420.481		5.58
						5.6	4933.58	#REF!	18.3736	18	0	0	0	205.151	1.02575	77.4487												30.7094	456.956	0.00434625	-426.246		5.6
						5.62	4946.99	#REF!	18.4392	18	0	0	0	205.151	1.02575	78.4744												30.7103	462.763	0.00347775	-432.053		5.62
						5.64	4960.34	#REF!	18.5048	18.5	0	0	0	205.151	1.02575	79.5002												30.7111	468.613	0.0026997	-437.902		5.64
						5.66	4973.63	#REF!	18.5705	18.5	0	0	0	205.151	1.02575	80.5259												30.7117	474.505	0.00205197	-443.793		5.66
						5.68	4986.86	#REF!	18.6361	18.5	0	0	0	205.151	1.02575	81.5517												30.7123	480.439	0.00151657	-449.727		5.68
						5.7	5000.04	#REF!	18.7017	18.5	0	0	0	205.151	1.02575	82.5775												30.7127	486.415	0.00107786	-455.702		5.7
						5.72	5013.16	#REF!	18.7673	18.5	0	0	0	205.151	1.02575	83.6032												30.713	492.433	0.00072223	-461.72		5.72
						5.74	5026.23	#REF!	18.8329	18.5	0	0	0	205.151	1.02575	84.629												30.7133	498.494	0.000424618	-467.781		5.74
						5.76	5039.25	#REF!	18.8986	18.5	0	0	0	205.151	1.02575	85.6547												30.7136	504.597	0.000190435	-473.884		5.76
						5.78	5052.21	#REF!	18.9642	18.5	0	0	0	205.151	1.02575	86.6805												30.7138	510.743	0	-480.029		5.78
[truncated: 136 more columns]

## Sheet: Bridgeport_4
																																			Annual	0.202064	0.203076	0.204094	0.226946	0.228084	0.229227	0.230376	0.231531	0.232691	0.259101	0.2604	0.261705	0.263017	0.264335
	INPUTS			ERROR CHECK		Surge height (m)	Wall Length (m)	sum of middleH * dL	Surge height (ft)	Rounding (ft)	Area (sq m)	Buildings	Building Values (million $)	Cum Value	Marginal Damage	Damage	2030	Expected Benefit (million $, PV)	Total Cost (million $, PV)	Residual Dam (million $, PV)	Net Benefit (million $, PV)	2080	Expected Benefit (million $, PV)	Total Cost (million $, PV)	Residual Dam (million $, PV)	Net Benefit (million $, PV)	2130	Expected Benefit (million $, PV)	Total Cost (million $, PV)	Residual Dam (million $, PV)	Net Benefit (million $, PV)		Surge height (m)		YEAR-2030	0	1	2	3	4	5	6	7	8	9	10	11	12	13
	SPATIAL DATA					1.84	795.632	#REF!	6.03704	6	0	0	0.076295	0	0	0		0	2.49213	6.71251	-2.49213		0	1.2496	29.0355	-1.2496		0	0.328722	184.803	-0.328722		1.84		AGE	0	1	2	3	4	5	6	7	8	9	10	11	12	13
	Target City	Bridgeport				1.86	828.161	#REF!	6.10266	6	0	0	0.076295	0.076295	0.000381475	0.000381475		0.00582332	2.73614	6.70668	-2.73032		0.0175882	1.40187	29.0179	-1.38429		0	0.395968	184.803	-0.395968		1.86			0.00012014	0.000115707	0.000111437	0.000129812	0.000125021	0.000120408	0.000115964	0.000111685	0.000107564	0.000125527	0.000120895	0.000116434	0.000112137	0.000107999
	Policy Year (base year: 2020)	#REF!				1.88	861.117	#REF!	6.16828	6	0	0	0.076295	0.15259	0.00076295	0.00114443		0.0202031	2.99673	6.6923	-2.97652		0.0759647	1.56681	28.9595	-1.49084		0	0.471756	184.803	-0.471756		1.88			0.000298635	0.000287615	0.000277001	0.000321975	0.000310093	0.00029865	0.00028763	0.000277015	0.000266793	0.000310783	0.000299315	0.00028827	0.000277632	0.000267387
	SLR rate (before policy)	3.14	mm/year			1.9	894.505	#REF!	6.2339	6	0	0	0.076295	0.228885	0.00114443	0.00228885		0.0439057	3.27461	6.6686	-3.2307		0.192084	1.74504	28.8434	-1.55295		0	0.556649	184.803	-0.556649		1.9			0.000496164	0.000477854	0.000460221	0.000533559	0.00051387	0.000494907	0.000476644	0.000459055	0.000442115	0.000513896	0.000494932	0.000476668	0.000459078	0.000442137
	SLR rate (after policy)	#REF!	mm/year			1.92	928.335	#REF!	6.29952	6	0	0	0.076295	0.30518	0.0015259	0.00381475		0.0765144	3.57049	6.63599	-3.49398		0.380021	1.9372	28.6555	-1.55718		0	0.651223	184.803	-0.651223		1.92			0.000689065	0.000663637	0.000639147	0.000738729	0.000711469	0.000685214	0.000659929	0.000635576	0.000612122	0.000709667	0.000683478	0.000658257	0.000633966	0.000610571
	MHHW	1.06	meter			1.94	962.613	#REF!	6.36514	6	0	0	0.076295	0.381475	0.00190738	0.00572213		0.116964	3.88514	6.59554	-3.76817		0.656082	2.14396	28.3794	-1.48788		0	0.756071	184.803	-0.756071		1.94			0.000864384	0.000832487	0.000801766	0.000923343	0.00088927	0.000856454	0.000824849	0.000794411	0.000765095	0.0008843	0.000851668	0.00082024	0.000789971	0.00076082
						1.96	997.346	#REF!	6.43076	6	0	0	0.076295	0.45777	0.00228885	0.00801098		0.1639	4.21929	6.54861	-4.05539		1.01854	2.36599	28.017	-1.34745		0	0.871799	184.803	-0.871799		1.96			0.00101631	0.000978804	0.000942685	0.00108105	0.00104116	0.00100274	0.000965735	0.000930097	0.000895775	0.00103161	0.000993538	0.000956875	0.000921564	0.000887557
						1.98	1032.54	#REF!	6.49638	6	0	0	0.076295	0.534065	0.00267033	0.0106813		0.215904	4.57372	6.4966	-4.35781		1.45387	2.60399	27.5816	-1.15012		0	0.99903	184.803	-0.99903		1.98			0.00114362	0.00110142	0.00106078	0.00121053	0.00116586	0.00112284	0.0010814	0.0010415	0.00100306	0.00115029	0.00110784	0.00106696	0.00102759	0.00098967
	GEV ESTIMATION					2	1068.21	#REF!	6.562	6.5	0	0	0.208638	0.742704	0.00371352	0.0143948		0.274328	4.94922	6.43818	-4.67489		2.00114	2.85867	27.0344	-0.857525		0	1.1384	184.803	-1.1384		2			0.00130806	0.00125979	0.0012133	0.00137682	0.00132601	0.00127708	0.00122995	0.00118456	0.00114085	0.00130191	0.00125387	0.0012076	0.00116303	0.00112012
	μ (location)	1.845				2.02	1104.35	#REF!	6.62762	6.5	0	0	0.208638	0.951342	0.00475671	0.0191515		0.339363	5.3466	6.37314	-5.00723		0	3.13074	29.0355	-3.13074		0	1.29057	184.803	-1.29057		2.02			0.00148649	0.00143164	0.00137881	0.00155466	0.00149729	0.00144204	0.00138883	0.00133758	0.00128822	0.00146183	0.00140789	0.00135593	0.0013059	0.00125771
	σ (scale)	0.1544				2.04	1140.97	#REF!	6.69324	6.5	0	0	0.208638	1.15998	0.0057999	0.0249514		0.410561	5.76668	6.30195	-5.35612		0.716391	3.42095	28.3191	-2.70456		0.32709	1.45619	184.475	-1.1291		2.04			0.00166611	0.00160462	0.00154541	0.00173008	0.00166624	0.00160475	0.00154553	0.0014885	0.00143357	0.00161641	0.00155676	0.00149931	0.00144399	0.0013907
	k (shape)	0.0752				2.06	1178.08	#REF!	6.75886	6.5	0	0	0.208638	1.36862	0.0068431	0.0317945		0.487178	6.2103	6.22533	-5.72312		1.49354	3.73006	27.542	-2.23652		1.41365	1.63596	183.389	-0.222312		2.06			0.00184097	0.00177303	0.0017076	0.00189658	0.00182659	0.00175919	0.00169427	0.00163175	0.00157153	0.00175933	0.0016944	0.00163188	0.00157166	0.00151366
						2.08	1215.68	#REF!	6.82448	6.5	0	0	0.208638	1.57726	0.00788629	0.0396808		0.568392	6.67831	6.14411	-6.10992		2.29094	4.05883	26.7446	-1.76789		3.32452	1.83058	181.478	1.49395		2.08			0.00200955	0.0019354	0.00186398	0.00205251	0.00197677	0.00190382	0.00183357	0.00176591	0.00170074	0.00188896	0.00181925	0.00175212	0.00168746	0.00162519
	Coefficients of the cost function					2.1	1253.77	#REF!	6.8901	6.5	0	0	0.208638	1.7859	0.00892948	0.0486103		0.653442	7.17158	6.05906	-6.51814		3.09487	4.40805	25.9406	-1.31318		6.08541	2.04075	178.717	4.04466		2.1			0.00217305	0.00209286	0.00201563	0.00219917	0.00211801	0.00203986	0.00196458	0.00189208	0.00182226	0.00200658	0.00193253	0.00186122	0.00179254	0.00172639
	coef1	1.25634				2.12	1292.37	#REF!	6.95572	6.5	0	0	0.208638	1.99453	0.00997267	0.058583		0.741702	7.69098	5.9708	-6.94928		3.89324	4.77852	25.1423	-0.885284		9.68575	2.26721	175.117	7.41854		2.12			0.00233418	0.00224805	0.00216509	0.00233951	0.00225318	0.00217003	0.00208995	0.00201283	0.00193855	0.00211507	0.00203702	0.00196185	0.00188945	0.00181973
	coef2	0.000864628				2.14	1331.46	#REF!	7.02134	7	0	0	0.11888	2.11341	0.0105671	0.06915		0.832131	8.23741	5.88038	-7.40528		4.67095	5.17105	24.3646	-0.5001		13.8463	2.5107	170.956	11.3356		2.14			0.00248027	0.00238874	0.00230059	0.00246131	0.00237049	0.00228301	0.00219876	0.00211763	0.00203948	0.00220379	0.00212246	0.00204414	0.00196871	0.00189606
	coef3	-1.85164e-07				2.16	1371.06	#REF!	7.08696	7	0	0	0.11888	2.23229	0.0111615	0.0803115		0.924089	8.81177	5.78842	-7.88768		5.41771	5.58645	23.6178	-0.16874		18.7276	2.77197	166.075	15.9556		2.16			0.00261934	0.00252268	0.00242959	0.00257333	0.00247837	0.00238691	0.00229883	0.002214	0.0021323	0.00228126	0.00219708	0.00211601	0.00203792	0.00196272
	coef4	2.57172e-11				2.18	1411.15	#REF!	7.15258	7	0	0	0.11888	2.35117	0.0117559	0.0920674		1.01726	9.41495	5.69524	-8.39769		6.12702	6.02557	22.9085	0.101454		24.0085	3.0518	160.794	20.9567		2.18			0.00276182	0.0026599	0.00256175	0.00268245	0.00258346	0.00248813	0.00239631	0.00230788	0.00222272	0.00235422	0.00226734	0.00218368	0.00210309	0.00202549
	q	1.63405e+07				2.2	1451.75	#REF!	7.2182	7	0	0	0.11888	2.47005	0.0123503	0.104418		1.11148	10.0479	5.60103	-8.9364		6.79529	6.48924	22.2402	0.306053		29.8397	3.35097	154.963	26.4887		2.2			0.00286836	0.00276251	0.00266057	0.00279817	0.00269492	0.00259547	0.00249969	0.00240745	0.00231861	0.00242785	0.00233826	0.00225198	0.00216887	0.00208884
	Growth Rate	0.005	%/year			2.22	1492.85	#REF!	7.28382	7	0	0	0.11888	2.58893	0.0129447	0.117362		1.20652	10.7115	5.50599	-9.50494		7.42115	6.9783	21.6143	0.442855		35.8943	3.67026	148.908	32.224		2.22			0.00294141	0.00283286	0.00272833	0.00288005	0.00277377	0.00267142	0.00257283	0.00247789	0.00238645	0.00250988	0.00241726	0.00232806	0.00224215	0.00215941
	discount rate	0.0426	%/year			2.24	1534.44	#REF!	7.34944	7	0	0	0.11888	2.70781	0.0135391	0.130901		1.30212	11.4066	5.41039	-10.1045		8.00492	7.49361	21.0306	0.511312		42.3207	4.01047	142.482	38.3102		2.24			0.00298395	0.00287383	0.00276778	0.00293077	0.00282262	0.00271846	0.00261815	0.00252153	0.00242848	0.00256353	0.00246893	0.00237783	0.00229008	0.00220557
	useful_life	30	years			2.26	1576.53	#REF!	7.41506	7	0	0	0.11888	2.82669	0.0141335	0.145035		1.39792	12.1343	5.31459	-10.7363		8.5481	8.03602	20.4874	0.512082		48.8089	4.37242	135.994	44.4365		2.26			0.00299928	0.0028886	0.002782	0.00295346	0.00284447	0.0027395	0.00263841	0.00254105	0.00244728	0.0025914	0.00249577	0.00240367	0.00231497	0.00222954
	CapEx	0.005				2.28	1619.09	#REF!	7.48068	7	0	0	0.11888	2.94557	0.0147279	0.159763		1.49358	12.8953	5.21893	-11.4017		9.05306	8.60638	19.9824	0.446673		55.5072	4.7569	129.295	50.7503		2.28			0.00299079	0.00288042	0.00277413	0.00295142	0.00284251	0.00273761	0.00263659	0.0025393	0.00244559	0.00259631	0.0025005	0.00240823	0.00231936	0.00223377
	Difference	0.02	meter			2.3	1662.12	#REF!	7.5463	7.5	0	0	0.68558	3.63115	0.0181558	0.177919		1.59025	13.6906	5.12226	-12.1003		9.5303	9.20555	19.5052	0.324756		62.2411	5.16474	122.561	57.0763		2.3			0.00300977	0.0028987	0.00279173	0.00297539	0.00286559	0.00275984	0.002658	0.00255991	0.00246545	0.00262301	0.00252622	0.00243299	0.00234321	0.00225674
	Minimum height where buildings locate	6	ft			2.32	1705.62	#REF!	7.61192	7.5	0	0	0.68558	4.31673	0.0215837	0.199502		1.68863	14.521	5.02387	-12.8324		9.98738	9.83435	19.0481	0.153025		68.6547	5.59676	116.148	63.0579		2.32			0.00304536	0.00293298	0.00282475	0.00301489	0.00290363	0.00279648	0.00269329	0.0025939	0.00249818	0.00266252	0.00256427	0.00246964	0.00237851	0.00229074
	A factor to account for other damages than buildings	2				2.34	1749.56	#REF!	7.67754	7.5	0	0	0.68558	5.00231	0.0250116	0.224514		1.78907	15.3875	4.92344	-13.5985		10.4299	10.4936	18.6056	-0.0637591		74.5527	6.05375	110.25	68.499		2.34			0.00308898	0.00297499	0.00286521	0.00306158	0.0029486	0.00283979	0.002735	0.00263407	0.00253687	0.00270763	0.00260771	0.00251148	0.00241881	0.00232955
	Ratio of houses w/ basements	1	(1=All have basements; 0=No basements)			2.36	1793.94	#REF!	7.74316	7.5	0	0	0.68558	5.68789	0.0284395	0.252953		1.89161	16.2909	4.82089	-14.3993		10.8621	11.1842	18.1734	-0.322047		80.0211	6.53654	104.781	73.4846		2.36			0.00313403	0.00301838	0.00290699	0.00310902	0.0029943	0.0028838	0.00277738	0.00267489	0.00257618	0.00275274	0.00265116	0.00255333	0.00245911	0.00236836
	Average height of the first floor	0.9	meter			2.38	1838.73	#REF!	7.80878	7.5	0	0	0.68558	6.37347	0.0318674	0.284821		1.99607	17.2319	4.71644	-15.2359		11.2879	11.9069	17.7476	-0.618953		85.0942	7.04593	99.7083	78.0483		2.38			0.0031756	0.00305842	0.00294555	0.00315243	0.0030361	0.00292406	0.00281616	0.00271224	0.00261215	0.00279369	0.0026906	0.00259131	0.00249569	0.00240359
	Coastal length 12ft	4391				2.4	1883.91	#REF!	7.8744	7.5	0	0	0.68558	7.05905	0.0352953	0.320116		2.10212	18.2114	4.61039	-16.1093		11.7098	12.6624	17.3257	-0.952592		89.799	7.5827	95.0036	82.2163		2.4			0.00321022	0.00309176	0.00297767	0.0031884	0.00307075	0.00295743	0.00284829	0.00274319	0.00264196	0.00282751	0.00272317	0.00262268	0.0025259	0.00243269
	OUTPUTS	2030	2080	2130		2.42	1929.47	#REF!	7.94002	7.5	0	0	0.68558	7.74463	0.0387232	0.358839		2.20936	19.2301	4.50315	-17.0208		12.1297	13.4515	16.9058	-1.32186		94.1584	8.14762	90.6441	86.0108		2.42			0.00323558	0.00311618	0.00300119	0.00321469	0.00309606	0.00298181	0.00287178	0.0027658	0.00266374	0.00285226	0.00274701	0.00264564	0.00254801	0.00245398
	Optimal Level of Flood Defense	No_Wall	2.26	2.94		2.44	1975.37	#REF!	8.00564	8	0	0	1.58035	9.32498	0.0466249	0.405464		2.31857	20.2887	4.39394	-17.9702		12.5533	14.2751	16.4822	-1.72175		98.239	8.74147	86.5636	89.4975		2.44			0.00328655	0.00316527	0.00304846	0.003266	0.00314548	0.0030294	0.00291761	0.00280995	0.00270626	0.00289878	0.00279181	0.00268879	0.00258956	0.002494
	Maximum height of Walls					2.46	2021.6	#REF!	8.07126	8	0	0	1.58035	10.9053	0.0545266	0.459991		2.43014	21.3879	4.28237	-18.9578		12.9845	15.1336	16.051	-2.14907		102.084	9.36498	82.719	92.7186		2.46			0.00335146	0.00322778	0.00310867	0.0033308	0.00320788	0.00308951	0.0029755	0.0028657	0.00275995	0.0029569	0.00284778	0.00274269	0.00264148	0.00254401
	Average height of Walls	#VALUE!	0.944	1.364		2.48	2068.11	#REF!	8.13688	8	0	0	1.58035	12.4857	0.0624284	0.522419		2.54419	22.5283	4.16832	-19.9841		13.4256	16.0279	15.6099	-2.6023		105.721	10.0189	79.0818	95.7018		2.48			0.00342144	0.00329518	0.00317358	0.00340029	0.00327481	0.00315396	0.00303758	0.00292548	0.00281753	0.00301885	0.00290745	0.00280016	0.00269683	0.00259731
	Average Elevation of wall	1.1	1.316	1.576		2.5	2114.88	#REF!	8.2025	8	0	0	1.58035	14.066	0.0703301	0.592749		2.6606	23.7104	4.05191	-21.0498		13.8774	16.9584	15.1581	-3.08104		109.171	10.7038	75.632	98.4667		2.5			0.00348988	0.0033611	0.00323707	0.00346795	0.00333997	0.00321672	0.00309802	0.00298369	0.00287359	0.00307887	0.00296525	0.00285583	0.00275044	0.00264894
	Wall Length	No_Wall	1576.53	3136.1		2.52	2161.88	#REF!	8.26812	8	0	0	1.58035	15.6464	0.0782318	0.670981		2.77911	24.9348	3.93339	-22.1556		14.3401	17.9259	14.6954	-3.58583		112.449	11.4205	72.3537	101.028		2.52			0.00355206	0.00342098	0.00329474	0.00352908	0.00339885	0.00327343	0.00315263	0.0030363	0.00292425	0.00313281	0.00301721	0.00290587	0.00279863	0.00269536
	Cost of Wall	No_Wall	8.03602	34.5881		2.54	2209.08	#REF!	8.33374	8	0	0	1.58035	17.2267	0.0861336	0.757114		2.89937	26.2018	3.81314	-23.3025		14.8129	18.9308	14.2226	-4.11796		115.569	12.1695	69.2335	103.4		2.54			0.0036047	0.00347168	0.00334356	0.00358049	0.00344837	0.00332112	0.00319856	0.00308053	0.00296685	0.00317787	0.0030606	0.00294766	0.00283889	0.00273413
	Expected Benefit	No_Wall	8.5481	158.029		2.56	2256.42	#REF!	8.39936	8	0	0	1.58035	18.8071	0.0940353	0.85115		3.02094	27.512	3.69157	-24.4911		15.2943	19.9737	13.7412	-4.67939		118.544	12.9515	66.2582	105.593		2.56			0.00364572	0.00351118	0.00338161	0.00362013	0.00348654	0.00335788	0.00323397	0.00311463	0.0029997	0.00321226	0.00309372	0.00297956	0.0028696	0.00276371
	Net Benefit	#VALUE!	0.512082	123.441		2.58	2303.89	#REF!	8.46498	8	0	0	1.58035	20.3874	0.101937	0.953087		3.14336	28.8656	3.56915	-25.7223		15.7824	21.0548	13.2531	-5.27245		121.388	13.7669	63.4143	107.621		2.58			0.00367394	0.00353837	0.0034078	0.00364687	0.0035123	0.00338269	0.00325786	0.00313764	0.00302185	0.003235	0.00311562	0.00300065	0.00288992	0.00278328
	Residual Damage	6.71251	20.4874	26.7735		2.6	2351.44	#REF!	8.5306	8.5	0	0	0.944124	21.3315	0.106658	1.05974		3.26579	30.263	3.44672	-26.9972		16.2736	22.1748	12.7619	-5.90121		124.107	14.6164	60.6959	109.49		2.6			0.00367787	0.00354215	0.00341144	0.00364933	0.00351466	0.00338496	0.00326005	0.00313975	0.00302389	0.00323603	0.00311662	0.00300161	0.00289084	0.00278416
	Expected Damage	6.71251	29.0355	184.803		2.62	2399.02	#REF!	8.59622	8.5	0	0	0.944124	22.2757	0.111378	1.17112		3.3875	31.7042	3.32501	-28.3167		16.7642	23.3338	12.2713	-6.56959		126.71	15.5004	58.093	111.209		2.62			0.00366083	0.00352574	0.00339564	0.00363086	0.00349687	0.00336783	0.00324355	0.00312386	0.00300858	0.00321838	0.00309962	0.00298523	0.00287507	0.00276898
						2.64	2446.61	#REF!	8.66184	8.5	0	0	0.944124	23.2198	0.116099	1.28722		3.50788	33.1896	3.20463	-29.6817		17.2511	24.5322	11.7844	-7.28107		129.209	16.4193	55.5939	112.789		2.64			0.00362588	0.00349208	0.00336322	0.00359453	0.00346189	0.00333414	0.0032111	0.00309261	0.00297848	0.00318481	0.00306728	0.00295409	0.00284508	0.00274009
	Surge height (ft)	Area submerged (sq m)	delta Area (sq m)	Building numbers	Building Values (million $)	2.66	2494.16	#REF!	8.72746	8.5	0	0	0.944124	24.1639	0.120819	1.40804		3.62641	34.7191	3.08609	-31.0927		17.7315	25.7702	11.304	-8.03874		131.614	17.3736	53.1887	114.24		2.66			0.00357577	0.00344382	0.00331674	0.00354313	0.00341238	0.00328646	0.00316518	0.00304838	0.00293589	0.00313782	0.00302203	0.00291051	0.0028031	0.00269966
0.9144	3	1963.9	0	0	0	2.68	2541.63	#REF!	8.79308	8.5	0	0	0.944124	25.108	0.12554	1.53358		3.74267	36.2929	2.96984	-32.5503		18.2029	27.0481	10.8326	-8.84515		133.934	18.3636	50.8687	115.57		2.68			0.00351299	0.00338335	0.0032585	0.00347915	0.00335076	0.00322711	0.00310803	0.00299333	0.00288287	0.00307965	0.00296601	0.00285656	0.00275114	0.00264962
1.0668	3.5	7201.1	5237.2		0	2.7	2588.98	#REF!	8.8587	8.5	0	0	0.944124	26.0521	0.130261	1.66384		3.85629	37.911	2.85622	-34.0547		18.6635	28.3659	10.372	-9.70241		136.175	19.3896	48.6274	116.786		2.7			0.00343974	0.00331281	0.00319056	0.00340482	0.00327917	0.00315816	0.00304162	0.00292938	0.00282128	0.00301232	0.00290116	0.0027941	0.002691	0.00259169
1.2192	4	9174.9	1973.8		0	2.72	2636.18	#REF!	8.92432	8.5	0	0	0.944124	26.9963	0.134981	1.79882		3.967	39.5732	2.74551	-35.6062		19.1117	29.7239	9.92382	-10.6122		138.343	20.452	46.4597	117.891		2.72			0.00335801	0.00323409	0.00311475	0.00332211	0.00319952	0.00308145	0.00296774	0.00285822	0.00275275	0.0029376	0.0028292	0.0027248	0.00262425	0.00252741
1.3716	4.5	9829.5	654.6			2.74	2683.19	#REF!	8.98994	8.5	0	0	0.944124	27.9404	0.139702	1.93853		4.07458	41.2796	2.63792	-37.205		19.5462	31.122	9.48927	-11.5758		140.441	21.5509	44.3618	118.89		2.74			0.00326953	0.00314887	0.00303267	0.00323278	0.00311349	0.00299859	0.00288794	0.00278137	0.00267873	0.00285707	0.00275163	0.00265009	0.0025523	0.00245812
1.524	5	11138.8	1309.3			2.76	2729.97	#REF!	9.05556	9	0	0	1.42485	29.3652	0.146826	2.08535		4.17899	43.0299	2.53352	-38.8509		19.9667	32.5603	9.06877	-12.5936		142.474	22.6866	42.329	119.787		2.76			0.00317949	0.00306216	0.00294916	0.00314199	0.00302604	0.00291437	0.00280683	0.00270325	0.0026035	0.00277528	0.00267287	0.00257424	0.00247924	0.00238775
1.6764	5.5	14389.7	3250.9			2.78	2776.5	#REF!	9.12118	9	0	0	1.42485	30.7901	0.15395	2.2393		4.28018	44.8241	2.43233	-40.544		20.3729	34.0389	8.66263	-13.666		144.449	23.8594	40.3538	120.589		2.78			0.00308819	0.00297423	0.00286448	0.00305002	0.00293747	0.00282907	0.00272467	0.00262413	0.00252729	0.00269253	0.00259317	0.00249748	0.00240532	0.00231656
1.8288	6	17964.3	3574.6	4.55323	0.61036	2.8	2822.73	#REF!	9.1868	9	0	0	1.42485	32.2149	0.161075	2.40038		4.37814	46.6621	2.33437	-42.2839		20.7645	35.5577	8.27104	-14.7933		146.363	25.0692	38.4395	121.294		2.8			0.00299596	0.0028854	0.00277892	0.00295721	0.00284809	0.00274299	0.00264176	0.00254428	0.00245039	0.00260911	0.00251283	0.0024201	0.00233079	0.00224478
1.9812	6.5	26517.6	8553.3	10.895	1.46047	2.82	2868.65	#REF!	9.25242	9	0	0	1.42485	33.6398	0.168199	2.56858		4.47286	48.5435	2.23965	-44.0706		21.1414	37.1167	7.8941	-15.9753		148.217	26.3164	36.5855	121.901		2.82			0.00290312	0.00279599	0.00269282	0.00286391	0.00275823	0.00265645	0.00255842	0.00246401	0.00237308	0.00252533	0.00243214	0.00234239	0.00225595	0.00217271
2.1336	7	32087.4	5569.8	7.09466	0.951039	2.84	2914.22	#REF!	9.31804	9	0	0	1.42485	35.0646	0.175323	2.7439		4.56434	50.4681	2.14817	-45.9038		21.5037	38.7158	7.5318	-17.2121		150.01	27.601	34.7925	122.409		2.84			0.00281004	0.00270635	0.00260648	0.00277047	0.00266823	0.00256977	0.00247494	0.00238361	0.00229565	0.00244151	0.00235141	0.00226464	0.00218107	0.00210059
2.286	7.5	60193.3	28105.9	35.8005	4.79906	2.86	2959.42	#REF!	9.38366	9	0	0	1.42485	36.4895	0.182447	2.92635		4.65259	52.4358	2.05992	-47.7833		21.8514	40.355	7.18408	-18.5036		151.741	28.9231	33.0614	122.818		2.86			0.00271705	0.00261678	0.00252022	0.00267721	0.00257841	0.00248326	0.00239163	0.00230337	0.00221837	0.00235794	0.00227093	0.00218713	0.00210642	0.00202869
2.4384	8	134236	74042.9	94.3138	12.6428	2.88	3004.23	#REF!	9.44928	9	0	0	1.42485	37.9144	0.189572	3.11592		4.73765	54.4464	1.97486	-49.7087		22.1847	42.0342	6.85078	-19.8495		153.408	30.2828	31.3941	123.126		2.88			0.00262446	0.00252761	0.00243434	0.00258445	0.00248908	0.00239723	0.00230877	0.00222357	0.00214152	0.00227492	0.00219097	0.00211012	0.00203225	0.00195726
2.5908	8.5	178471	44234.4	56.3446	7.55299	2.9	3048.62	#REF!	9.5149	9.5	0	0	2.37768	40.292	0.20146	3.31738		4.81966	56.4995	1.89285	-51.6799		22.5043	43.7532	6.53122	-21.2489		155.012	31.6802	29.7905	123.332		2.9			0.00253621	0.00244262	0.00235249	0.00249609	0.00240398	0.00231527	0.00222983	0.00214754	0.0020683	0.00219584	0.00211481	0.00203677	0.00196161	0.00188922
2.7432	9	236884	58412.9	74.4048	9.97396	2.92	3092.58	#REF!	9.58052	9.5	0	0	2.37768	42.6697	0.213349	3.53073		4.89875	58.595	1.81375	-53.6962		22.8107	45.512	6.22482	-22.7014		156.552	33.1153	28.2504	123.437		2.92			0.00245159	0.00236112	0.00227399	0.00241139	0.0023224	0.0022367	0.00215416	0.00207467	0.00199811	0.00212008	0.00204185	0.0019665	0.00189393	0.00182404
2.8956	9.5	348283	111400	141.898	19.0214	2.94	3136.1	#REF!	9.64614	9.5	0	0	2.37768	45.0474	0.225237	3.75596		4.97504	60.7325	1.73746	-55.7575		23.1045	47.3105	5.93105	-24.2061		158.029	34.5881	26.7735	123.441		2.94			0.00237002	0.00228256	0.00219833	0.00232979	0.00224382	0.00216102	0.00208127	0.00200447	0.0019305	0.00204714	0.00197159	0.00189884	0.00182877	0.00176128
3.048	10	430891	82608.2	105.224	14.1053	2.96	3179.15	#REF!	9.71176	9.5	0	0	2.37768	47.4251	0.237125	3.99309		5.04863	62.912	1.66388	-57.8634		23.3861	49.1486	5.64944	-25.7625		159.443	36.0987	25.3591	123.345		2.96			0.00229108	0.00220654	0.00212511	0.00225088	0.00216781	0.00208782	0.00201077	0.00193657	0.00186511	0.00197664	0.0019037	0.00183345	0.00176579	0.00170063
3.2004	10.5	528522	97630.1	124.359	16.6703	2.98	3221.74	#REF!	9.77738	9.5	0	0	2.37768	49.8027	0.249014	4.2421		5.11959	65.1331	1.59291	-60.0135		23.656	51.0261	5.37955	-27.3702		160.796	37.6472	24.0063	123.149		2.98			0.00221445	0.00213273	0.00205403	0.00217432	0.00209409	0.00201681	0.00194239	0.00187071	0.00180168	0.0019083	0.00183788	0.00177006	0.00170474	0.00164183
3.3528	11	619841	91319.7	116.321	15.5928	3	3263.84	#REF!	9.843	9.5	0	0	2.37768	52.1804	0.260902	4.503		5.18802	67.3956	1.52449	-62.2076		23.9145	52.943	5.12096	-29.0285		162.089	39.2335	22.714	122.855		3			0.00213989	0.00206092	0.00198487	0.0020999	0.00202241	0.00194778	0.0018759	0.00180668	0.00174001	0.00184191	0.00177394	0.00170848	0.00164543	0.00158471
3.5052	11.5	682933	63091.8	80.3646	10.7729	3.02	3305.45	#REF!	9.90862	9.5	0	0	2.37768	54.5581	0.27279	4.77579		5.25397	69.6994	1.45854	-64.4455		24.1622	54.8992	4.8733	-30.737		163.322	40.8576	21.4809	122.464		3.02			0.00206723	0.00199094	0.00191747	0.00202743	0.00195262	0.00188056	0.00181116	0.00174433	0.00167996	0.00177732	0.00171173	0.00164857	0.00158773	0.00152914
3.6576	12	750146	67213	85.6141	11.4766	3.04	3346.57	#REF!	9.97424	9.5	0	0	2.37768	56.9358	0.284679	5.06047		5.31752	72.0443	1.39499	-66.7267		24.3993	56.8945	4.63618	-32.4952		164.497	42.5197	20.3054	121.977		3.04			0.00199634	0.00192268	0.00185173	0.0019568	0.00188459	0.00181504	0.00174806	0.00168356	0.00162143	0.00171441	0.00165115	0.00159022	0.00153153	0.00147502
3.81	12.5	795696	45550.5	58.021	7.77771	3.06	3387.19	#REF!	10.0399	10	0	0	1.76316	58.6989	0.293495	5.35397		5.37869	74.4299	1.33381	-69.0513		24.6261	58.9289	4.40939	-34.3028		165.616	44.2197	19.1866	121.396		3.06			0.00192605	0.00185498	0.00178652	0.00188683	0.0018172	0.00175014	0.00168556	0.00162336	0.00156345	0.00165216	0.0015912	0.00153248	0.00147593	0.00142146
3.9624	13	872729	77032.5	98.1219	13.1532	3.08	3427.31	#REF!	10.1055	10	0	0	1.76316	60.4621	0.30231	5.65628		5.43753	76.8563	1.27497	-71.4188		24.8428	61.0023	4.19265	-36.1595		166.679	45.9576	18.1233	120.722		3.08			0.00185659	0.00178807	0.00172209	0.00181775	0.00175067	0.00168607	0.00162385	0.00156393	0.00150622	0.00159078	0.00153208	0.00147554	0.00142109	0.00136865
4.1148	13.5	938410	65680.7	83.6623	11.2149	3.1	3466.93	#REF!	10.1711	10	0	0	1.76316	62.2252	0.311126	5.96741		5.49409	79.3233	1.21842	-73.8292		25.0498	63.1147	3.9857	-38.0649		167.689	47.7334	17.1139	119.955		3.1			0.00178815	0.00172217	0.00165861	0.00174977	0.0016852	0.00162301	0.00156312	0.00150544	0.00144989	0.00153043	0.00147395	0.00141956	0.00136717	0.00131672
4.2672	14	1.00452e+06	66105.8	84.2038	11.2875	3.12	3506.04	#REF!	10.2367	10	0	0	1.76316	63.9884	0.319942	6.28735		5.54839	81.8306	1.16411	-76.2822		25.2473	65.2659	3.78824	-40.0186		168.646	49.5473	16.1567	119.099		3.12			0.00172092	0.00165742	0.00159625	0.00168305	0.00162095	0.00156113	0.00150352	0.00144804	0.0013946	0.00147125	0.00141696	0.00136467	0.00131431	0.00126581
4.4196	14.5	1.06713e+06	62613.2	79.755	10.6912	3.14	3544.66	#REF!	10.3023	10	0	0	1.76316	65.7516	0.328758	6.6161		5.60051	84.3782	1.112	-78.7777		25.4355	67.4559	3.59996	-42.0203		169.552	51.3991	15.25	118.153		3.14			0.00165504	0.00159397	0.00153515	0.00161774	0.00155804	0.00150054	0.00144517	0.00139184	0.00134048	0.00141337	0.00136121	0.00131098	0.0012626	0.00121601
4.572	15	1118003	50874.3	64.8023	8.68675	3.16	3582.77	#REF!	10.368	10	0	0	1.76316	67.5147	0.337574	6.95368		5.6505	86.966	1.06201	-81.3155		25.615	69.6846	3.42054	-44.0697		170.411	53.289	14.3918	117.122		3.16			0.00159063	0.00153194	0.00147541	0.00155393	0.00149659	0.00144136	0.00138818	0.00133695	0.00128761	0.00135688	0.00130681	0.00125859	0.00121214	0.00116741
4.7244	15.5	1.18409e+06	66083.1	84.1748	11.2836	3.18	3620.39	#REF!	10.4336	10	0	0	1.76316	69.2779	0.346389	7.30007		5.6984	89.5938	1.0141	-83.8954		25.7858	71.9521	3.24967	-46.1662		171.222	55.2169	13.5802	116.005		3.18			0.0015278	0.00147142	0.00141712	0.00149174	0.0014367	0.00138368	0.00133262	0.00128344	0.00123608	0.00130187	0.00125383	0.00120756	0.001163	0.00112008
4.8768	16	1.2386e+06	54512.5	69.4365	9.30797	3.2	3657.52	#REF!	10.4992	10	0	0	1.76316	71.0411	0.355205	7.65527		5.7443	92.2617	0.968207	-86.5174		25.9485	74.2582	3.08701	-48.3097		171.989	57.183	12.8131	114.806		3.2			0.00146661	0.00141249	0.00136037	0.00143124	0.00137842	0.00132755	0.00127856	0.00123138	0.00118594	0.00124839	0.00120232	0.00115796	0.00111523	0.00107407
5.0292	16.5	1.31355e+06	74948	95.4667	12.7973	3.22	3694.16	#REF!	10.5648	10.5	0	0	2.38147	73.4225	0.367113	8.02239		5.78826	94.9694	0.924245	-89.1811		26.1033	76.603	2.9322	-50.4997		172.714	59.1872	12.0882	113.527		3.22			0.00140767	0.00135573	0.0013057	0.00137299	0.00132233	0.00127353	0.00122654	0.00118128	0.00113768	0.00119695	0.00115278	0.00111024	0.00106927	0.00102982
5.1816	17	1.38322e+06	69675.8	88.7511	11.8971	3.24	3730.32	#REF!	10.6304	10.5	0	0	2.38147	75.804	0.37902	8.40141		5.83036	97.717	0.882142	-91.8866		26.2506	78.9864	2.78486	-52.7358		173.399	61.2296	11.4035	112.17		3.24			0.0013509	0.00130105	0.00125303	0.00131693	0.00126833	0.00122153	0.00117645	0.00113304	0.00109123	0.00114747	0.00110512	0.00106434	0.00102507	0.00098724
5.334	17.5	1.49072e+06	107497	136.927	18.3551	3.26	3766.01	#REF!	10.6961	10.5	0	0	2.38147	78.1854	0.390927	8.79233		5.87068	100.504	0.841825	-94.6336		26.3909	81.4085	2.64465	-55.0176		174.046	63.3102	10.7567	110.736		3.26			0.0012962	0.00124836	0.0012023	0.00126295	0.00121634	0.00117146	0.00112823	0.0010866	0.0010465	0.00109986	0.00105927	0.00102018	0.000982536	0.000946279
5.4864	18	1.56918e+06	78461.9	99.9426	13.3973	3.28	3801.22	#REF!	10.7617	10.5	0	0	2.38147	80.5669	0.402835	9.19517		5.90928	103.331	0.803224	-97.4221		26.5243	83.8692	2.51123	-57.3449		174.657	65.4291	10.1458	109.228		3.28			0.0012435	0.00119761	0.00115342	0.00121098	0.00116629	0.00112326	0.00108181	0.00104189	0.00100344	0.00105406	0.00101516	0.000977699	0.00094162	0.000906873
						3.3	3835.97	#REF!	10.8273	10.5	0	0	2.38147	82.9484	0.414742	9.60991		5.94624	106.198	0.766271	-100.252		26.6512	86.3684	2.38429	-59.7172		175.233	67.5863	9.56904	107.647		3.3			0.00119274	0.00114873	0.00110634	0.00116096	0.00111812	0.00107686	0.00103712	0.000998848	0.000961988	0.00101	0.000972728	0.000936832	0.000902261	0.000868966
					265.48	3.32	3870.27	#REF!	10.8929	10.5	0	0	2.38147	85.3298	0.426649	10.0366		5.98161	109.105	0.730901	-103.123		26.772	88.9064	2.26353	-62.1344		175.778	69.7819	9.02448	105.996		3.32			0.00114385	0.00110164	0.00106099	0.00111281	0.00107175	0.0010322	0.00099411	0.000957425	0.000922094	0.000967622	0.000931915	0.000897526	0.000864405	0.000832507
						3.34	3904.12	#REF!	10.9585	10.5	0	0	2.38147	87.7113	0.438557	10.4751		6.01546	112.051	0.697052	-106.035		26.8868	91.4829	2.14866	-64.5961		176.292	72.0159	8.5104	104.276		3.34			0.00109678	0.0010563	0.00101732	0.00106649	0.00102713	0.000989227	0.000952723	0.000917566	0.000883706	0.000926872	0.000892669	0.000859728	0.000828002	0.000797447
						3.36	3937.53	#REF!	11.0242	11	0	0	1.9491	89.6604	0.448302	10.9234		6.04784	115.037	0.664669	-108.989		26.9961	94.0982	2.03942	-67.1021		176.777	74.2885	8.02524	102.489		3.36			0.00105125	0.00101246	0.000975095	0.00102171	0.000984011	0.000947699	0.000912727	0.000879045	0.000846607	0.00088752	0.000854768	0.000823226	0.000792847	0.00076359
12 foot wall						3.38	3970.5	#REF!	11.0898	11	0	0	1.9491	91.6095	0.458048	11.3815		6.07881	118.062	0.633699	-111.983		27.0999	96.7521	1.93557	-69.6522		177.235	76.5996	7.56748	100.635		3.38			0.00100727	0.000970099	0.0009343	0.000978492	0.000942383	0.000907608	0.000874115	0.000841859	0.000810793	0.000849556	0.000818206	0.000788012	0.000758933	0.000730927
4.76	Cost	432				3.4	4003.05	#REF!	11.1554	11	0	0	1.9491	93.5586	0.467793	11.8493		6.10842	121.127	0.604089	-115.019		27.1987	99.4448	1.83685	-72.2462		177.667	78.9493	7.13567	98.7175		3.4			0.000964823	0.000929219	0.000894929	0.000936807	0.000902237	0.000868942	0.000836877	0.000805995	0.000776252	0.000812968	0.000782968	0.000754075	0.000726248	0.000699448
4.976	Cost	440.646				3.42	4035.18	#REF!	11.221	11	0	0	1.9491	95.5077	0.477538	12.3268		6.13672	124.232	0.575787	-118.096		27.2925	102.176	1.74304	-74.8838		178.074	81.3378	6.72842	96.7363		3.42			0.000923896	0.000889803	0.000856967	0.00089664	0.000863553	0.000831686	0.000800995	0.000771437	0.000742969	0.000777736	0.000749036	0.000721395	0.000694774	0.000669136
5.236	Cost	455.643				3.44	4066.89	#REF!	11.2866	11	0	0	1.9491	97.4568	0.487284	12.8141		6.16376	127.377	0.548742	-121.213		27.3816	104.946	1.65392	-77.5649		178.458	83.7651	6.34439	94.6931		3.44			0.000884467	0.000851829	0.000820395	0.00085797	0.000826309	0.000795817	0.000766449	0.000738166	0.000710926	0.000743839	0.000716389	0.000689953	0.000664493	0.000639972
						3.46	4098.21	#REF!	11.3523	11	0	0	1.9491	99.4059	0.497029	13.3111		6.1896	130.561	0.522904	-124.372		27.4662	107.756	1.56925	-80.2894		178.82	86.2312	5.9823	92.5891		3.46			0.000846512	0.000815274	0.000785189	0.000820768	0.00079048	0.00076131	0.000733216	0.000706159	0.0006801	0.000711249	0.000685003	0.000659725	0.00063538	0.000611933
						3.48	4129.13	#REF!	11.4179	11	0	0	1.9491	101.355	0.506775	13.8179		6.21428	133.785	0.498224	-127.571		27.5467	110.604	1.48884	-83.0569		179.162	88.7362	5.64093	90.4254		3.48			0.000810001	0.00078011	0.000751323	0.000785004	0.000756036	0.000728137	0.000701267	0.000675389	0.000650466	0.00067994	0.000654849	0.000630684	0.00060741	0.000584996
						3.5	4159.67	#REF!	11.4835	11	0	0	1.9491	103.304	0.51652	14.3344		6.23785	137.049	0.474655	-130.811		27.623	113.491	1.41247	-85.8675		179.483	91.2802	5.31913	88.2032		3.5			0.000774903	0.000746307	0.000718767	0.000750646	0.000722946	0.000696267	0.000670574	0.000645828	0.000621996	0.00064988	0.000625898	0.000602801	0.000580557	0.000559133
						3.52	4189.82	#REF!	11.5491	11.5	0	0	1.53898	104.843	0.524215	14.8586		6.26035	140.353	0.452153	-134.093		27.6955	116.417	1.33996	-88.721		179.787	93.8634	5.01583	85.9233		3.52			0.000741082	0.000713735	0.000687396	0.000717559	0.00069108	0.000665577	0.000641016	0.000617362	0.00059458	0.000620951	0.000598036	0.000575968	0.000554713	0.000534243
						3.54	4219.6	#REF!	11.6147	11.5	0	0	1.53898	106.382	0.53191	15.3905		6.28183	143.697	0.430677	-137.415		27.7644	119.382	1.27114	-91.6172		180.073	96.4857	4.73001	83.5868		3.54			0.000708526	0.00068238	0.000657199	0.00068573	0.000660425	0.000636054	0.000612582	0.000589977	0.000568206	0.000593138	0.00057125	0.00055017	0.000529868	0.000510315
						3.56	4249.02	#REF!	11.6804	11.5	0	0	1.53898	107.921	0.539605	15.9301		6.30232	147.081	0.410184	-140.778		27.8297	122.386	1.20582	-94.5561		180.342	99.1473	4.4607	81.1946		3.56			0.000677219	0.000652228	0.00062816	0.000655139	0.000630963	0.000607679	0.000585255	0.000563658	0.000542858	0.000566424	0.000545522	0.000525391	0.000506003	0.000487331
						3.58	4278.09	#REF!	11.746	11.5	0	0	1.53898	109.46	0.5473	16.4774		6.32187	150.504	0.390634	-144.182		27.8917	125.429	1.14383	-97.5375		180.596	101.848	4.20698	78.7474		3.58			0.000647138	0.000623257	0.000600258	0.000625764	0.000602672	0.000580433	0.000559013	0.000538385	0.000518517	0.000540788	0.000520832	0.000501612	0.000483101	0.000465274
						3.6	4306.8	#REF!	11.8116	11.5	0	0	1.53898	110.999	0.554995	17.0324		6.34052	153.968	0.371988	-147.628		27.9505	128.512	1.08503	-100.561		180.835	104.588	3.96796	76.2461		3.6			0.000618258	0.000595443	0.00057347	0.000597579	0.000575527	0.000554289	0.000533835	0.000514135	0.000495163	0.000516203	0.000497155	0.000478809	0.00046114	0.000444123
						3.62	4335.17	#REF!	11.8772	11.5	0	0	1.53898	112.538	0.56269	17.5951		6.3583	157.472	0.354206	-151.114		28.0063	131.634	1.02924	-103.627		181.06	107.368	3.7428	73.6914		3.62			0.000590551	0.000568759	0.00054777	0.000570554	0.000549499	0.000529222	0.000509693	0.000490884	0.000472769	0.000492645	0.000474465	0.000456957	0.000440094	0.000423854
						3.64	4363.21	#REF!	11.9428	11.5	0	0	1.53898	114.077	0.570385	18.1655		6.37526	161.016	0.337252	-154.641		28.0592	134.795	0.976325	-106.736		181.272	110.188	3.5307	71.084		3.64			0.000563988	0.000543175	0.000523131	0.000544658	0.00052456	0.000505202	0.000486559	0.000468604	0.000451312	0.000470084	0.000452737	0.00043603	0.000419939	0.000404443
						3.66	4390.92	#REF!	12.0085	12	0	0	1.43457	115.512	0.577558	18.7431		6.39142	164.6	0.321088	-158.209		28.1094	137.996	0.926137	-109.887		181.472	113.047	3.33092	68.4247		3.66			0.00053852	0.000518648	0.000499509	0.000519845	0.000500662	0.000482187	0.000464393	0.000447256	0.000430752	0.000448477	0.000431928	0.000415989	0.000400638	0.000385854
						3.68	4418.3	#REF!	12.0741	12	0	0	1.43457	116.946	0.584731	19.3278		6.40682	168.225	0.305682	-161.818		28.157	141.236	0.87854	-113.079		181.66	115.946	3.14275	65.7139		3.68			0.000514119	0.000495147	0.000476875	0.000496084	0.000477778	0.000460147	0.000443166	0.000426813	0.000411063	0.000427798	0.000412012	0.000396808	0.000382165	0.000368062
						3.7	4445.38	#REF!	12.1397	12	0	0	1.43457	118.381	0.591903	19.9197		6.42151	171.89	0.290999	-165.469		28.2021	144.516	0.833404	-116.314		181.837	118.885	2.9655	62.9524		3.7			0.000490753	0.000472643	0.000455202	0.000473343	0.000455876	0.000439053	0.000422851	0.000407247	0.000392219	0.000408018	0.000392961	0.00037846	0.000364494	0.000351044
						3.72	4472.14	#REF!	12.2053	12	0	0	1.43457	119.815	0.599076	20.5188		6.4355	175.596	0.277006	-169.16		28.2449	147.836	0.790604	-119.591		182.004	121.863	2.79855	60.1406		3.72			0.00046839	0.000451105	0.000434459	0.000451589	0.000434924	0.000418875	0.000403418	0.000388531	0.000374193	0.000389106	0.000374747	0.000360918	0.0003476	0.000334772
						3.74	4498.61	#REF!	12.2709	12	0	0	1.43457	121.25	0.606249	21.125		6.44883	179.342	0.263673	-172.893		28.2855	151.196	0.750021	-122.91		182.161	124.882	2.64129	57.279		3.74			0.000446997	0.000430502	0.000414615	0.000430789	0.000414892	0.000399582	0.000384837	0.000370635	0.000356958	0.000371033	0.000357341	0.000344154	0.000331454	0.000319223
						3.76	4524.77	#REF!	12.3366	12	0	0	1.43457	122.684	0.613422	21.7384		6.46154	183.129	0.250969	-176.667		28.324	154.595	0.711541	-126.271		182.309	127.941	2.49316	54.3682		3.76			0.00042654	0.0004108	0.000395641	0.00041091	0.000395747	0.000381143	0.000367078	0.000353532	0.000340486	0.000353769	0.000340714	0.000328141	0.000316032	0.00030437
						3.78	4550.65	#REF!	12.4022	12	0	0	1.43457	124.119	0.620595	22.359		6.47364	186.956	0.238866	-180.482		28.3604	158.034	0.675055	-129.674		182.449	131.04	2.3536	51.4085		3.78			0.000406987	0.000391968	0.000377504	0.000391919	0.000377456	0.000363527	0.000350112	0.000337193	0.00032475	0.000337283	0.000324837	0.00031285	0.000301305	0.000290186
						3.8	4576.25	#REF!	12.4678	12	0	0	1.43457	125.554	0.627768	22.9868		6.48517	190.824	0.227335	-184.339		28.395	161.514	0.64046	-133.119		182.58	134.18	2.22213	48.4004		3.8			0.000388303	0.000373974	0.000360174	0.000373781	0.000359988	0.000346704	0.00033391	0.000321588	0.00030972	0.000321547	0.000309681	0.000298254	0.000287247	0.000276647
						3.82	4601.57	#REF!	12.5334	12.5	0	0	0.972214	126.526	0.632629	23.6194		6.49616	194.733	0.216351	-188.237		28.4278	165.033	0.607661	-136.605		182.704	137.36	2.09827	45.3443		3.82			0.000370421	0.000356752	0.000343587	0.00035643	0.000343277	0.000330609	0.000318409	0.000306659	0.000295343	0.000306501	0.00029519	0.000284297	0.000273806	0.000263702
						3.84	4626.62	#REF!	12.599	12.5	0	0	0.972214	127.498	0.63749	24.2569		6.50662	198.683	0.20589	-192.177		28.4589	168.593	0.576566	-140.134		182.821	140.58	1.98159	42.2405		3.84			0.000353315	0.000340277	0.00032772	0.000339839	0.000327299	0.000315221	0.000303588	0.000292385	0.000281596	0.000292121	0.000281341	0.000270959	0.00026096	0.000251331
						3.86	4651.4	#REF!	12.6647	12.5	0	0	0.972214	128.47	0.642351	24.8993		6.51658	202.674	0.195927	-196.157		28.4884	172.192	0.547089	-143.704		182.931	143.842	1.87165	39.0893		3.86			0.00033696	0.000324525	0.000312549	0.000323985	0.000312029	0.000300515	0.000289425	0.000278745	0.000268459	0.000278386	0.000268113	0.000258219	0.000248691	0.000239513
						3.88	4675.93	#REF!	12.7303	12.5	0	0	0.972214	129.442	0.647212	25.5465		6.52607	206.706	0.18644	-200.18		28.5164	175.833	0.519147	-147.316		183.034	147.143	1.76808	35.8911		3.88			0.000321329	0.000309471	0.000298051	0.00030884	0.000297443	0.000286467	0.000275896	0.000265715	0.00025591	0.000265272	0.000255483	0.000246056	0.000236976	0.000228231
						3.9	4700.19	#REF!	12.7959	12.5	0	0	0.972214	130.415	0.652073	26.1986		6.5351	210.779	0.177406	-204.244		28.5428	179.513	0.492659	-150.971		183.132	150.486	1.6705	32.646		3.9			0.000306398	0.000295091	0.000284202	0.00029438	0.000283516	0.000273054	0.000262978	0.000253274	0.000243927	0.000252757	0.00024343	0.000234447	0.000225795	0.000217463
						3.92	4724.21	#REF!	12.8615	12.5	0	0	0.972214	131.387	0.656934	26.8555		6.5437	214.894	0.168805	-208.35		28.568	183.235	0.467551	-154.667		183.224	153.87	1.57856	29.3544		3.92			0.000292139	0.000281359	0.000270976	0.000280577	0.000270224	0.000260252	0.000250648	0.000241399	0.000232491	0.000240817	0.00023193	0.000223371	0.000215129	0.00020719
						3.94	4747.98	#REF!	12.9271	12.5	0	0	0.972214	132.359	0.661795	27.5173		6.55189	219.049	0.160615	-212.497		28.5918	186.996	0.443751	-158.405		183.311	157.294	1.49192	26.0165		3.94			0.000278529	0.00026825	0.000258351	0.000267408	0.00025754	0.000248036	0.000238883	0.000230068	0.000221578	0.000229429	0.000220963	0.000212809	0.000204956	0.000197392
						3.96	4771.52	#REF!	12.9928	12.5	0	0	0.972214	133.331	0.666656	28.1839		6.55969	223.247	0.152818	-216.687		28.6143	190.799	0.42119	-162.184		183.392	160.76	1.41027	22.6325		3.96			0.00026554	0.000255741	0.000246304	0.000254846	0.000245441	0.000236384	0.000227661	0.00021926	0.000211169	0.000218571	0.000210506	0.000202738	0.000195256	0.000188051
						3.98	4794.82	#REF!	13.0584	13	0	0	1.87903	135.21	0.676051	28.86		6.56711	227.485	0.145393	-220.918		28.6357	194.642	0.3998	-166.006		183.469	164.267	1.33331	19.2026		3.98			0.000253188	0.000243845	0.000234847	0.000242905	0.000233941	0.000225308	0.000216994	0.000208986	0.000201274	0.000208255	0.00020057	0.000193168	0.00018604	0.000179175
						4	4817.89	#REF!	13.124	13	0	0	1.87903	137.089	0.685447	29.5454		6.57418	231.765	0.138322	-225.191		28.656	198.526	0.379516	-169.87		183.542	167.815	1.26075	15.7271		4			0.00024144	0.000232531	0.00022395	0.000231552	0.000223007	0.000214778	0.000206852	0.000199219	0.000191868	0.000198451	0.000191128	0.000184075	0.000177282	0.00017074
						4.02	4840.73	#REF!	13.1896	13	0	0	1.87903	138.968	0.694842	30.2403		6.58092	236.087	0.131588	-229.506		28.6752	202.451	0.360277	-173.776		183.61	171.404	1.19232	12.206		4.02			0.000230266	0.000221769	0.000213585	0.000220758	0.000212612	0.000204766	0.00019721	0.000189932	0.000182923	0.000189133	0.000182154	0.000175432	0.000168958	0.000162723
						4.04	4863.35	#REF!	13.2552	13	0	0	1.87903	140.847	0.704237	30.9445		6.58733	240.451	0.125172	-233.864		28.6935	206.417	0.342027	-177.724		183.675	175.035	1.12777	8.63963		4.04			0.000219636	0.000211531	0.000203725	0.000210494	0.000202726	0.000195245	0.00018804	0.000181101	0.000174418	0.000180276	0.000173623	0.000167216	0.000161046	0.000155103
						4.06	4885.76	#REF!	13.3209	13	0	0	1.87903	142.726	0.713632	31.6582		6.59345	244.856	0.11906	-238.263		28.7108	210.424	0.324711	-181.714		183.736	178.708	1.06687	5.02801		4.06			0.000209522	0.00020179	0.000194344	0.000200732	0.000193324	0.00018619	0.00017932	0.000172702	0.000166329	0.000171856	0.000165514	0.000159406	0.000153524	0.000147859
						4.08	4907.95	#REF!	13.3865	13	0	0	1.87903	144.605	0.723027	32.3812		6.59927	249.304	0.113236	-242.704		28.7272	214.473	0.308279	-185.746		183.793	182.422	1.0094	1.3713		4.08			0.000199898	0.000192521	0.000185417	0.000191447	0.000184382	0.000177578	0.000171025	0.000164714	0.000158635	0.00016385	0.000157804	0.00015198	0.000146372	0.000140971
						4.1	4929.93	#REF!	13.4521	13	0	0	1.87903	146.484	0.732422	33.1136		6.60482	253.793	0.107686	-247.188		28.7428	218.562	0.292683	-189.82		183.847	186.178	0.955143	-2.33038		4.1			0.000190739	0.000183701	0.000176922	0.000182614	0.000175875	0.000169385	0.000163134	0.000157114	0.000151316	0.000156237	0.000150472	0.000144919	0.000139571	0.000134421
						4.12	4951.71	#REF!	13.5177	13.5	0	0	1.40187	147.886	0.739432	33.853		6.61011	258.324	0.102396	-251.714		28.7576	222.693	0.277879	-193.936		183.899	189.976	0.90392	-6.07694		4.12			0.00018201	0.000175293	0.000168825	0.000174198	0.00016777	0.000161579	0.000155616	0.000149874	0.000144343	0.000148987	0.000143489	0.000138194	0.000133094	0.000128183
						4.14	4973.29	#REF!	13.5833	13.5	0	0	1.40187	149.288	0.746441	34.5995		6.61515	262.898	0.0973545	-256.283		28.7717	226.866	0.263825	-198.094		183.947	193.815	0.855553	-9.86831		4.14			0.000173689	0.00016728	0.000161107	0.00016618	0.000160047	0.000154141	0.000148453	0.000142975	0.000137699	0.000142082	0.000136839	0.000131789	0.000126926	0.000122242
						4.16	4994.67	#REF!	13.649	13.5	0	0	1.40187	150.69	0.75345	35.3529		6.61996	267.514	0.0925488	-260.894		28.785	231.08	0.250482	-202.295		183.993	197.697	0.809873	-13.7044		4.16			0.000165759	0.000159642	0.000153751	0.000158541	0.00015269	0.000147056	0.000141629	0.000136403	0.000131369	0.000135506	0.000130505	0.000125689	0.000121051	0.000116584
						4.18	5015.86	#REF!	13.7146	13.5	0	0	1.40187	152.092	0.76046	36.1134		6.62454	272.172	0.0879678	-265.547		28.7977	235.336	0.237811	-206.538		184.036	201.621	0.766724	-17.5851		4.18			0.000158201	0.000152363	0.000146741	0.000151263	0.000145681	0.000140305	0.000135128	0.000130141	0.000125339	0.000129243	0.000124474	0.00011988	0.000115456	0.000111196
						4.2	5036.86	#REF!	13.7802	13.5	0	0	1.40187	153.494	0.767469	36.8809		6.62891	276.872	0.0836006	-270.243		28.8097	239.633	0.225778	-210.823		184.077	205.587	0.725959	-21.5105		4.2			0.000150998	0.000145426	0.00014006	0.000144329	0.000139003	0.000133874	0.000128934	0.000124176	0.000119593	0.000123279	0.00011873	0.000114348	0.000110129	0.000106065
						4.22	5057.67	#REF!	13.8458	13.5	0	0	1.40187	154.896	0.774478	37.6553		6.63307	281.615	0.0794368	-274.982		28.8212	243.972	0.21435	-215.151		184.115	209.595	0.687439	-25.4804		4.22			0.000144134	0.000138815	0.000133692	0.000137724	0.000132642	0.000127747	0.000123033	0.000118493	0.00011412	0.000117599	0.000113259	0.00010908	0.000105055	0.000101178
						4.24	5078.31	#REF!	13.9114	13.5	0	0	1.40187	156.298	0.781488	38.4368		6.63704	286.401	0.0754667	-279.764		28.832	248.353	0.203494	-219.521		184.151	213.646	0.651034	-29.4948		4.24			0.000137591	0.000132514	0.000127624	0.000131431	0.000126581	0.00012191	0.000117411	0.000113078	0.000108906	0.00011219	0.00010805	0.000104063	0.000100222	9.6524e-05
						4.26	5098.76	#REF!	13.9771	13.5	0	0	1.40187	157.699	0.788497	39.2253		6.64083	291.229	0.0716808	-284.588		28.8423	252.776	0.193181	-223.934		184.186	217.74	0.616622	-33.5538		4.26			0.000131356	0.000126508	0.00012184	0.000125436	0.000120807	0.000116349	0.000112055	0.00010792	0.000103938	0.000107038	0.000103088	9.92843e-05	9.56206e-05	9.2092e-05
						4.28	5119.03	#REF!	14.0427	14	0	0	1.6125	159.312	0.79656	40.0219		6.64444	296.1	0.0680703	-289.455		28.8521	257.241	0.183382	-228.389		184.218	221.876	0.584087	-37.6572		4.28			0.000125416	0.000120788	0.000116331	0.000119727	0.000115309	0.000111054	0.000106955	0.000103009	9.92074e-05	0.000102135	9.83661e-05	9.47362e-05	9.12402e-05	8.78733e-05
						4.3	5139.14	#REF!	14.1083	14	0	0	1.6125	160.924	0.804622	40.8265		6.64788	301.014	0.0646266	-294.366		28.8614	261.748	0.17407	-232.887		184.249	226.054	0.55332	-41.805		4.3			0.000119758	0.000115339	0.000111083	0.000114291	0.000110073	0.000106011	0.000102099	9.83314e-05	9.47028e-05	9.74674e-05	9.38707e-05	9.04066e-05	8.70705e-05	8.38574e-05
						4.32	5159.07	#REF!	14.1739	14	0	0	1.6125	162.537	0.812685	41.6392		6.65117	305.97	0.0613415	-299.319		28.8703	266.298	0.165219	-237.427		184.278	230.276	0.52422	-45.9973		4.32			0.000114368	0.000110148	0.000106083	0.000109113	0.000105087	0.000101209	9.74741e-05	9.38771e-05	9.04129e-05	9.30237e-05	8.95909e-05	8.62849e-05	8.31008e-05	8.00342e-05
						4.34	5178.84	#REF!	14.2395	14	0	0	1.6125	164.149	0.820747	42.4599		6.6543	310.97	0.0582074	-304.316		28.8787	270.889	0.156805	-242.011		184.306	234.54	0.49669	-50.234		4.34			0.000109233	0.000105202	0.00010132	0.000104182	0.000100338	9.66351e-05	9.30691e-05	8.96347e-05	8.6327e-05	8.87928e-05	8.55162e-05	8.23605e-05	7.93212e-05	7.63941e-05
						4.36	5198.44	#REF!	14.3052	14	0	0	1.6125	165.762	0.82881	43.2887		6.65729	316.013	0.055217	-309.355		28.8867	275.523	0.148805	-246.637		184.332	238.847	0.47064	-54.5152		4.36			0.000104339	0.000100489	9.67806e-05	9.94854e-05	9.58142e-05	9.22785e-05	8.88732e-05	8.55936e-05	8.24351e-05	8.47642e-05	8.16363e-05	7.86238e-05	7.57224e-05	7.29281e-05
						4.38	5217.89	#REF!	14.3708	14	0	0	1.6125	167.374	0.836872	44.1256		6.66014	321.099	0.0523634	-314.438		28.8943	280.2	0.141198	-251.306		184.357	243.197	0.445986	-58.8408		4.38			9.9676e-05	9.59978e-05	9.24553e-05	9.50112e-05	9.15051e-05	8.81284e-05	8.48762e-05	8.17442e-05	7.87276e-05	8.09279e-05	7.79415e-05	7.50653e-05	7.22953e-05	6.96274e-05
						4.4	5237.17	#REF!	14.4364	14	0	0	1.6125	168.987	0.844935	44.9705		6.66287	326.228	0.0496399	-319.565		28.9015	284.919	0.133964	-256.018		184.38	247.591	0.422648	-63.2108		4.4			9.5232e-05	9.17178e-05	8.83332e-05	9.07486e-05	8.73998e-05	8.41746e-05	8.10684e-05	7.80768e-05	7.51956e-05	7.72743e-05	7.44228e-05	7.16764e-05	6.90314e-05	6.6484e-05
						4.42	5256.3	#REF!	14.502	14.5	0	0	1.33639	170.323	0.851617	45.8222		6.66547	331.4	0.0470404	-324.735		28.9084	289.681	0.127082	-260.772		184.402	252.027	0.400551	-67.6254		4.42			9.09937e-05	8.76359e-05	8.4402e-05	8.66846e-05	8.34858e-05	8.0405e-05	7.74379e-05	7.45803e-05	7.18282e-05	7.37922e-05	7.10691e-05	6.84465e-05	6.59207e-05	6.34881e-05
						4.44	5275.28	#REF!	14.5676	14.5	0	0	1.33639	171.66	0.858299	46.6805		6.66795	336.616	0.0445591	-329.948		28.915	294.485	0.120536	-265.57		184.423	256.507	0.379627	-72.0844		4.44			8.69515e-05	8.37428e-05	8.06525e-05	8.281e-05	7.97541e-05	7.6811e-05	7.39766e-05	7.12467e-05	6.86176e-05	7.04733e-05	6.78727e-05	6.53681e-05	6.29559e-05	6.06327e-05
						4.46	5294.11	#REF!	14.6333	14.5	0	0	1.33639	172.996	0.864981	47.5454		6.67032	341.875	0.0421902	-335.205		28.9212	299.333	0.114308	-270.411		184.443	261.031	0.35981	-76.5879		4.46			8.30961e-05	8.00297e-05	7.70764e-05	7.91156e-05	7.61961e-05	7.33843e-05	7.06763e-05	6.80682e-05	6.55564e-05	6.731e-05	6.48261e-05	6.24339e-05	6.013e-05	5.79111e-05
						4.48	5312.79	#REF!	14.6989	14.5	0	0	1.33639	174.333	0.871663	48.4171		6.67258	347.178	0.0399285	-340.505		28.9271	304.223	0.108382	-275.296		184.461	265.597	0.341037	-81.136		4.48			7.94187e-05	7.6488e-05	7.36654e-05	7.55931e-05	7.28035e-05	7.01169e-05	6.75295e-05	6.50375e-05	6.26375e-05	6.42947e-05	6.19221e-05	5.96371e-05	5.74364e-05	5.53169e-05
						4.5	5331.32	#REF!	14.7645	14.5	0	0	1.33639	175.669	0.878344	49.2955		6.67474	352.524	0.0377689	-345.85		28.9328	309.156	0.102742	-280.223		184.479	270.208	0.323251	-85.7286		4.5			7.5911e-05	7.31098e-05	7.04119e-05	7.22341e-05	6.95685e-05	6.70013e-05	6.45288e-05	6.21476e-05	5.98542e-05	6.14205e-05	5.91539e-05	5.6971e-05	5.48687e-05	5.28439e-05
						4.52	5349.72	#REF!	14.8301	14.5	0	0	1.33639	177.005	0.885026	50.1805		6.6768	357.914	0.0357066	-351.238		28.9381	314.132	0.0973735	-285.194		184.496	274.862	0.306396	-90.3659		4.52			7.2565e-05	6.98872e-05	6.73083e-05	6.9031e-05	6.64837e-05	6.40303e-05	6.16674e-05	5.93918e-05	5.72001e-05	5.86805e-05	5.6515e-05	5.44295e-05	5.2421e-05	5.04865e-05
						4.54	5367.97	#REF!	14.8957	14.5	0	0	1.33639	178.342	0.891708	51.0722		6.67877	363.348	0.033737	-356.67		28.9432	319.151	0.0922633	-290.208		184.512	279.56	0.290422	-95.0478		4.54			6.93731e-05	6.68131e-05	6.43476e-05	6.59764e-05	6.35417e-05	6.11969e-05	5.89387e-05	5.67637e-05	5.4669e-05	5.60683e-05	5.39992e-05	5.20066e-05	5.00874e-05	4.82391e-05
						4.56	5386.09	#REF!	14.9614	14.5	0	0	1.33639	179.678	0.89839	51.9706		6.68065	368.826	0.0318557	-362.145		28.9481	324.214	0.0873982	-295.265		184.527	284.302	0.275279	-99.7743		4.56			6.6328e-05	6.38804e-05	6.15231e-05	6.30632e-05	6.0736e-05	5.84948e-05	5.63362e-05	5.42573e-05	5.22551e-05	5.35778e-05	5.16007e-05	4.96965e-05	4.78626e-05	4.60964e-05
						4.58	5404.07	#REF!	15.027	15	0	0	1.08584	180.764	0.90382	52.8744		6.68245	374.348	0.0300587	-367.665		28.9527	329.319	0.0827658	-300.367		184.542	289.087	0.260921	-104.546		4.58			6.34213e-05	6.10809e-05	5.88269e-05	6.02832e-05	5.80586e-05	5.59162e-05	5.38528e-05	5.18655e-05	4.99516e-05	5.1202e-05	4.93125e-05	4.74928e-05	4.57402e-05	4.40523e-05
						4.6	5421.92	#REF!	15.0926	15	0	0	1.08584	181.85	0.909249	53.7836		6.68416	379.914	0.0283419	-373.229		28.9571	334.468	0.0783544	-305.511		184.555	283.604	0.247307	-99.0488		4.6			6.06466e-05	5.84086e-05	5.62532e-05	5.76303e-05	5.55037e-05	5.34555e-05	5.14829e-05	4.95831e-05	4.77534e-05	4.89355e-05	4.71297e-05	4.53905e-05	4.37155e-05	4.21024e-05
						4.62	5439.63	#REF!	15.1582	15	0	0	1.08584	182.936	0.914678	54.6983		6.6858	385.524	0.0267017	-378.838		28.9613	339.661	0.074153	-310.7		184.568	288.307	0.234395	-103.739		4.62			5.79978e-05	5.58576e-05	5.37964e-05	5.50987e-05	5.30655e-05	5.11073e-05	4.92213e-05	4.74049e-05	4.56556e-05	4.67733e-05	4.50473e-05	4.3385e-05	4.1784e-05	4.02421e-05
						4.64	5457.22	#REF!	15.2238	15	0	0	1.08584	184.021	0.920107	55.6184		6.68737	391.178	0.0251346	-384.49		28.9654	344.897	0.0701512	-315.932		184.58	293.052	0.222148	-108.472		4.64			5.54693e-05	5.34224e-05	5.1451e-05	5.26827e-05	5.07386e-05	4.88663e-05	4.7063e-05	4.53263e-05	4.36537e-05	4.47105e-05	4.30606e-05	4.14716e-05	3.99412e-05	3.84673e-05
						4.66	5474.68	#REF!	15.2895	15	0	0	1.08584	185.107	0.925536	56.544		6.68887	396.876	0.023637	-390.187		28.9692	350.177	0.0663391	-321.208		184.592	297.84	0.210528	-113.248		4.66			5.30555e-05	5.10977e-05	4.92121e-05	5.0377e-05	4.8518e-05	4.67276e-05	4.50032e-05	4.33425e-05	4.17431e-05	4.27424e-05	4.11651e-05	3.96461e-05	3.8183e-05	3.6774e-05
						4.68	5492.01	#REF!	15.3551	15	0	0	1.08584	186.193	0.930966	57.4749		6.6903	402.619	0.0222059	-395.928		28.9728	355.5	0.0627071	-326.527		184.603	302.671	0.199503	-118.068		4.68			5.0751e-05	4.88782e-05	4.70745e-05	4.81764e-05	4.63986e-05	4.46864e-05	4.30374e-05	4.14492e-05	3.99197e-05	4.08646e-05	3.93566e-05	3.79043e-05	3.65056e-05	3.51584e-05
						4.7	5509.23	#REF!	15.4207	15	0	0	1.08584	187.279	0.936395	58.4113		6.69167	408.406	0.0208381	-401.714		28.9763	360.867	0.0592463	-331.891		184.613	307.545	0.189041	-122.932		4.7			4.85509e-05	4.67593e-05	4.50338e-05	4.6076e-05	4.43757e-05	4.27382e-05	4.11611e-05	3.96422e-05	3.81793e-05	3.90729e-05	3.76311e-05	3.62424e-05	3.4905e-05	3.36169e-05
						4.72	5526.32	#REF!	15.4863	15	0	0	1.08584	188.365	0.941824	59.3532		6.69298	414.237	0.0195307	-407.544		28.9796	366.278	0.0559484	-337.299		184.623	312.462	0.17911	-127.838		4.72			4.64503e-05	4.47362e-05	4.30854e-05	4.40713e-05	4.2445e-05	4.08787e-05	3.93702e-05	3.79173e-05	3.65181e-05	3.73633e-05	3.59845e-05	3.46566e-05	3.33777e-05	3.2146e-05
						4.74	5543.29	#REF!	15.5519	15.5	0	0	1.61195	189.977	0.949884	60.303		6.69423	420.113	0.0182808	-413.419		28.9827	371.733	0.0528049	-342.75		184.633	317.422	0.169682	-132.789		4.74			4.44466e-05	4.28064e-05	4.12268e-05	4.21595e-05	4.06038e-05	3.91054e-05	3.76623e-05	3.62725e-05	3.4934e-05	3.57334e-05	3.44148e-05	3.31448e-05	3.19217e-05	3.07437e-05
						4.76	5560.15	#REF!	15.6176	15.5	0	0	1.61195	191.589	0.957944	61.261		6.69542	426.034	0.0170858	-419.339		28.9857	377.232	0.0498083	-348.246		184.642	322.425	0.160729	-137.783		4.76			4.2535e-05	4.09654e-05	3.94537e-05	4.03362e-05	3.88477e-05	3.74141e-05	3.60335e-05	3.47038e-05	3.34232e-05	3.41793e-05	3.29181e-05	3.17033e-05	3.05334e-05	2.94067e-05
						4.78	5576.89	#REF!	15.6832	15.5	0	0	1.61195	193.201	0.966003	62.227		6.69656	432	0.015943	-425.303		28.9886	382.775	0.0469512	-353.786		184.65	327.471	0.152227	-142.821		4.78			4.0711e-05	3.92087e-05	3.77618e-05	3.85969e-05	3.71726e-05	3.58009e-05	3.44798e-05	3.32074e-05	3.1982e-05	3.26974e-05	3.14908e-05	3.03287e-05	2.92095e-05	2.81316e-05
						4.8	5593.51	#REF!	15.7488	15.5	0	0	1.61195	194.813	0.974063	63.201		6.69766	438.01	0.0148501	-431.312		28.9913	388.362	0.0442266	-359.371		184.658	332.56	0.14415	-147.902		4.8			3.89704e-05	3.75324e-05	3.61473e-05	3.69376e-05	3.55746e-05	3.42618e-05	3.29975e-05	3.17798e-05	3.06071e-05	3.12839e-05	3.01295e-05	2.90177e-05	2.79468e-05	2.69156e-05
						4.82	5610.02	#REF!	15.8144	15.5	0	0	1.61195	196.425	0.982123	64.1832		6.6987	444.065	0.0138047	-437.366		28.9939	393.993	0.041628	-365		184.666	337.693	0.136476	-153.027		4.82			3.73092e-05	3.59324e-05	3.46065e-05	3.53544e-05	3.40498e-05	3.27933e-05	3.15831e-05	3.04177e-05	2.92952e-05	2.99357e-05	2.8831e-05	2.77671e-05	2.67424e-05	2.57556e-05
						4.84	5626.43	#REF!	15.88	15.5	0	0	1.61195	198.037	0.990183	65.1734		6.6997	450.165	0.0128046	-443.466		28.9964	399.669	0.0391491	-370.673		184.673	342.87	0.129183	-158.196		4.84			3.57235e-05	3.44053e-05	3.31356e-05	3.38436e-05	3.25947e-05	3.13919e-05	3.02335e-05	2.91178e-05	2.80433e-05	2.86494e-05	2.75922e-05	2.6574e-05	2.55934e-05	2.46489e-05
						4.86	5642.72	#REF!	15.9457	15.5	0	0	1.61195	199.648	0.998242	66.1716		6.70066	456.31	0.0118477	-449.61		28.9987	405.389	0.0367841	-376.39		184.68	348.09	0.122251	-163.409		4.86			3.42097e-05	3.29473e-05	3.17315e-05	3.24017e-05	3.1206e-05	3.00544e-05	2.89454e-05	2.78772e-05	2.68485e-05	2.74221e-05	2.64102e-05	2.54356e-05	2.4497e-05	2.3593e-05
						4.88	5658.91	#REF!	16.0113	16	0	0	1.1635	200.812	1.00406	67.1757		6.70157	462.501	0.0109321	-455.799		29.001	411.154	0.0345273	-382.153		184.687	353.353	0.115661	-168.666		4.88			3.27632e-05	3.15542e-05	3.03898e-05	3.10243e-05	2.98794e-05	2.87768e-05	2.77149e-05	2.66921e-05	2.57072e-05	2.62501e-05	2.52814e-05	2.43485e-05	2.345e-05	2.25846e-05
						4.9	5674.99	#REF!	16.0769	16	0	0	1.1635	201.975	1.00988	68.1855		6.70245	468.736	0.0100558	-462.034		29.0031	416.963	0.0323736	-387.96		184.693	358.66	0.109395	-173.967		4.9			3.1381e-05	3.0223e-05	2.91077e-05	2.97084e-05	2.86121e-05	2.75562e-05	2.65394e-05	2.556e-05	2.46168e-05	2.51307e-05	2.42033e-05	2.33102e-05	2.245e-05	2.16216e-05
						4.92	5690.97	#REF!	16.1425	16	0	0	1.1635	203.139	1.01569	69.2012		6.70329	475.017	0.00921715	-468.313		29.0052	422.816	0.0303181	-393.811		184.699	364.011	0.103436	-179.312		4.92			3.00601e-05	2.89508e-05	2.78825e-05	2.84512e-05	2.74013e-05	2.63901e-05	2.54163e-05	2.44784e-05	2.35751e-05	2.40615e-05	2.31736e-05	2.23185e-05	2.14949e-05	2.07017e-05
						4.94	5706.84	#REF!	16.2081	16	0	0	1.1635	204.302	1.02151	70.2227		6.70409	481.343	0.00841439	-474.639		29.0071	428.715	0.0283558	-399.707		184.705	369.406	0.0977684	-184.701		4.94			2.87976e-05	2.77349e-05	2.67115e-05	2.72499e-05	2.62444e-05	2.52759e-05	2.43432e-05	2.34449e-05	2.25797e-05	2.30403e-05	2.219e-05	2.13712e-05	2.05825e-05	1.9823e-05
						4.96	5722.62	#REF!	16.2738	16	0	0	1.1635	205.466	1.02733	71.2501		6.70486	487.714	0.00764591	-481.009		29.009	434.658	0.0264825	-405.649		184.71	374.845	0.092377	-190.135		4.96			2.7591e-05	2.65728e-05	2.55922e-05	2.61021e-05	2.51389e-05	2.42112e-05	2.33178e-05	2.24573e-05	2.16286e-05	2.20646e-05	2.12504e-05	2.04662e-05	1.9711e-05	1.89836e-05
						4.98	5738.29	#REF!	16.3394	16	0	0	1.1635	206.629	1.03315	72.2832		6.7056	494.131	0.00691016	-487.425		29.0108	440.646	0.0246937	-411.635		184.715	380.327	0.0872474	-195.612		4.98			2.64376e-05	2.5462e-05	2.45224e-05	2.50052e-05	2.40825e-05	2.31938e-05	2.23379e-05	2.15136e-05	2.07197e-05	2.11325e-05	2.03527e-05	1.96016e-05	1.88783e-05	1.81817e-05
						5	5753.87	#REF!	16.405	16	0	0	1.1635	207.793	1.03896	73.3222		6.7063	500.593	0.00620567	-493.887		29.0125	446.679	0.0229856	-417.666		184.72	385.854	0.082366	-201.134		5			2.5335e-05	2.44001e-05	2.34997e-05	2.39569e-05	2.30729e-05	2.22214e-05	2.14014e-05	2.06117e-05	1.98511e-05	2.02419e-05	1.9495e-05	1.87756e-05	1.80827e-05	1.74154e-05
						5.02	5769.35	#REF!	16.4706	16	0	0	1.1635	208.956	1.04478	74.367		6.70698	507.101	0.00553105	-500.394		29.0141	452.756	0.0213542	-423.742		184.725	391.425	0.0777202	-206.7		5.02			2.42809e-05	2.33848e-05	2.25219e-05	2.2955e-05	2.21079e-05	2.12921e-05	2.05063e-05	1.97496e-05	1.90208e-05	1.93909e-05	1.86754e-05	1.79862e-05	1.73225e-05	1.66833e-05
						5.04	5784.73	#REF!	16.5362	16.5	0	0	1.59966	210.556	1.05278	75.4197		6.70762	513.655	0.00488492	-506.947		29.0157	458.879	0.0197958	-429.864		184.729	397.041	0.0732977	-212.311		5.04			2.32737e-05	2.24148e-05	2.15877e-05	2.19979e-05	2.11861e-05	2.04043e-05	1.96513e-05	1.89262e-05	1.82278e-05	1.85783e-05	1.78927e-05	1.72324e-05	1.65965e-05	1.59841e-05
						5.06	5800.02	#REF!	16.6019	16.5	0	0	1.59966	212.156	1.06078	76.4805		6.70824	520.254	0.00426602	-513.546		29.0172	465.047	0.0183069	-436.03		184.733	402.7	0.0690869	-217.967		5.06			2.23112e-05	2.14879e-05	2.06949e-05	2.10835e-05	2.03055e-05	1.95561e-05	1.88345e-05	1.81395e-05	1.74701e-05	1.7802e-05	1.71451e-05	1.65124e-05	1.59031e-05	1.53162e-05
						5.08	5815.21	#REF!	16.6675	16.5	0	0	1.59966	213.755	1.06878	77.5493		6.70883	526.9	0.0036731	-520.191		29.0186	471.26	0.0168842	-442.242		184.737	408.404	0.0650771	-223.667		5.08			2.13913e-05	2.06019e-05	1.98417e-05	2.02098e-05	1.9464e-05	1.87457e-05	1.8054e-05	1.73878e-05	1.67461e-05	1.70605e-05	1.6431e-05	1.58246e-05	1.52407e-05	1.46783e-05
						5.1	5830.32	#REF!	16.7331	16.5	0	0	1.59966	215.355	1.07678	78.6261		6.7094	533.591	0.003105	-526.881		29.02	477.519	0.0155246	-448.499		184.741	414.152	0.0612578	-229.411		5.1			2.0512e-05	1.97551e-05	1.90261e-05	1.93748e-05	1.86599e-05	1.79713e-05	1.73081e-05	1.66694e-05	1.60543e-05	1.63521e-05	1.57487e-05	1.51675e-05	1.46078e-05	1.40687e-05
						5.12	5845.33	#REF!	16.7987	16.5	0	0	1.59966	216.955	1.08477	79.7108		6.70995	540.328	0.0025606	-533.618		29.0213	483.823	0.014225	-454.802		184.745	419.945	0.0576193	-235.2		5.12			1.96714e-05	1.89455e-05	1.82464e-05	1.85768e-05	1.78913e-05	1.72311e-05	1.65952e-05	1.59828e-05	1.5393e-05	1.56752e-05	1.50967e-05	1.45396e-05	1.40031e-05	1.34863e-05
						5.14	5860.26	#REF!	16.8643	16.5	0	0	1.59966	218.554	1.09277	80.8036		6.71047	547.111	0.00203885	-540.401		29.0225	490.172	0.0129826	-461.15		184.748	425.783	0.0541525	-241.035		5.14			1.88677e-05	1.81715e-05	1.75009e-05	1.7814e-05	1.71566e-05	1.65235e-05	1.59138e-05	1.53265e-05	1.47609e-05	1.50282e-05	1.44737e-05	1.39396e-05	1.34252e-05	1.29297e-05
						5.16	5875.1	#REF!	16.93	16.5	0	0	1.59966	220.154	1.10077	81.9044		6.71097	553.94	0.00153873	-547.23		29.0237	496.567	0.0117946	-467.543		184.752	431.665	0.0508487	-246.914		5.16			1.80992e-05	1.74313e-05	1.6788e-05	1.70847e-05	1.64543e-05	1.58471e-05	1.52623e-05	1.46991e-05	1.41566e-05	1.44099e-05	1.38781e-05	1.3366e-05	1.28728e-05	1.23978e-05
						5.18	5889.85	#REF!	16.9956	16.5	0	0	1.59966	221.754	1.10877	83.0132		6.7114	560.816	0.00110949	-554.105		29.0248	503.007	0.0106587	-473.982		184.755	437.592	0.0476995	-252.837		5.18			0	0	0	1.63874e-05	1.57827e-05	1.52003e-05	1.46393e-05	1.40991e-05	1.35788e-05	1.38188e-05	1.33089e-05	1.28177e-05	1.23447e-05	1.18892e-05
						5.2	5904.51	#REF!	17.0612	17	0	0	1.69958	223.453	1.11727	84.1304		6.71172	567.738	0.000784006	-561.026		29.0259	509.493	0.00957217	-480.467		184.758	443.564	0.0446973	-258.806		5.2			0	0	0	0	0	0	0	0	0	1.32538e-05	1.27647e-05	1.22936e-05	1.184e-05	1.14031e-05
						5.22	5919.09	#REF!	17.1268	17	0	0	1.69958	225.153	1.12576	85.2562		6.71197	574.706	0.000541553	-567.994		29.027	516.025	0.00853284	-486.998		184.761	449.581	0.0418346	-264.82		5.22			0	0	0	0	0	0	0	0	0	0	0	0	0	0
						5.24	5933.59	#REF!	17.1924	17	0	0	1.69958	226.852	1.13426	86.3905		6.71214	581.72	0.00036539	-575.008		29.028	522.602	0.00753847	-493.575		184.763	455.643	0.0391044	-270.879		5.24			0	0	0	0	0	0	0	0	0	0	0	0	0	0
						5.26	5948	#REF!	17.2581	17	0	0	1.69958	228.552	1.14276	87.5332		6.71228	588.781	0.000227973	-582.069		29.0289	529.226	0.00658698	-500.197		184.766	461.75	0.0365001	-276.984		5.26			0	0	0	0	0	0	0	0	0	0	0	0	0	0
						5.28	5962.34	#REF!	17.3237	17	0	0	1.69958	230.252	1.15126	88.6845		6.71238	595.889	0.000129891	-589.176		29.0298	535.895	0.00567637	-506.865		184.769	467.902	0.0340156	-283.133		5.28			0	0	0	0	0	0	0	0	0	0	0	0	0	0
						5.3	5976.59	#REF!	17.3893	17	0	0	1.69958	231.951	1.15976	89.8442		6.71244	603.043	6.41153e-05	-596.33		29.0307	542.61	0.00480475	-513.58		184.771	474.099	0.0316447	-289.328		5.3			0	0	0	0	0	0	0	0	0	0	0	0	0	0
						5.32	5990.76	#REF!	17.4549	17	0	0	1.69958	233.651	1.16825	91.0125		6.71248	610.243	2.47716e-05	-603.531		29.0315	549.372	0.00397033	-520.34		184.773	480.341	0.0293821	-295.568		5.32			0	0	0	0	0	0	0	0	0	0	0	0	0	0
						5.34	6004.86	#REF!	17.5205	17.5	0	0	2.29439	235.945	1.17973	92.1922		6.7125	617.491	3.26947e-06	-610.778		29.0323	556.179	0.00317137	-527.147		184.775	486.629	0.0272221	-301.854		5.34			0	0	0	0	0	0	0	0	0	0	0	0	0	0
						5.36	6018.88	#REF!	17.5862	17.5	0	0	2.29439	238.24	1.1912	93.3834		6.71251	624.785	0	-618.073		29.0331	563.033	0.00240623	-534		184.777	492.962	0.0251599	-308.185		5.36			0	0	0	0	0	0	0	0	0	0	0	0	0	0
						5.38	6032.82	#REF!	17.6518	17.5	0	0	2.29439	240.534	1.20267	94.5861		6.71251	632.126	0	-625.414		29.0337	569.933	0.00176947	-540.899		184.779	499.341	0.0231905	-314.562		5.38			0	0	0	0	0	0	0	0	0	0	0	0	0	0
						5.4	6046.69	#REF!	17.7174	17.5	0	0	2.29439	242.828	1.21414	95.8002		6.71251	639.514	0	-632.802		29.0343	576.879	0.0012433	-547.845		184.781	505.765	0.0213094	-320.984		5.4			0	0	0	0	0	0	0	0	0	0	0	0	0	0
						5.42	6060.48	#REF!	17.783	17.5	0	0	2.29439	245.123	1.22561	97.0258		6.71251	646.949	0	-640.237		29.0347	583.872	0.000827103	-554.837		184.783	512.235	0.0195123	-327.452		5.42			0	0	0	0	0	0	0	0	0	0	0	0	0	0
						5.44	6074.2	#REF!	17.8486	17.5	0	0	2.29439	247.417	1.23709	98.2629		6.71251	654.432	0	-647.719		29.035	590.911	0.000477006	-561.876		184.785	518.751	0.0177951	-333.966		5.44			0	0	0	0	0	0	0	0	0	0	0	0	0	0
						5.46	6087.84	#REF!	17.9143	17.5	0	0	2.29439	249.712	1.24856	99.5115		6.71251	661.961	0	-655.249		29.0353	597.997	0.000209637	-568.962		184.786	525.313	0.0161539	-340.526		5.46			0	0	0	0	0	0	0	0	0	0	0	0	0	0
						5.48	6101.42	#REF!	17.9799	17.5	0	0	2.29439	252.006	1.26003	100.772		6.71251	669.538	0	-662.825		29.0355	605.129	0	-576.094		184.788	531.92	0.014585	-347.132		5.48			0	0	0	0	0	0	0	0	0	0	0	0	0	0
						5.5	6114.92	#REF!	18.0455	18	0	0	0	252.006	1.26003	102.032												184.79	538.573	0.0129966	-353.784		5.5			0	0	0	0	0	0	0	0	0	0	0	0	0	0
						5.52	6128.35	#REF!	18.1111	18	0	0	0	252.006	1.26003	103.292												184.791	545.273	0.0114783	-360.482		5.52
						5.54	6141.72	#REF!	18.1767	18	0	0	0	252.006	1.26003	104.552												184.792	552.018	0.0100269	-367.225		5.54
						5.56	6155.01	#REF!	18.2424	18	0	0	0	252.006	1.26003	105.812												184.794	558.809	0.00863943	-374.016		5.56
						5.58	6168.24	#REF!	18.308	18	0	0	0	252.006	1.26003	107.072												184.795	565.647	0.00731288	-380.852		5.58
						5.6	6181.4	#REF!	18.3736	18	0	0	0	252.006	1.26003	108.332												184.796	572.531	0.00604449	-387.735		5.6
						5.62	6194.5	#REF!	18.4392	18	0	0	0	252.006	1.26003	109.592												184.798	579.461	0.0048316	-394.664		5.62
						5.64	6207.53	#REF!	18.5048	18.5	0	0	0	252.006	1.26003	110.852												184.799	586.438	0.00374673	-401.639		5.64
						5.66	6220.5	#REF!	18.5705	18.5	0	0	0	252.006	1.26003	112.112												184.8	593.461	0.00284493	-408.662		5.66
						5.68	6233.4	#REF!	18.6361	18.5	0	0	0	252.006	1.26003	113.372												184.8	600.531	0.00210063	-415.731		5.68
						5.7	6246.24	#REF!	18.7017	18.5	0	0	0	252.006	1.26003	114.632												184.801	607.648	0.00149162	-422.847		5.7
						5.72	6259.01	#REF!	18.7673	18.5	0	0	0	252.006	1.26003	115.892												184.802	614.811	0.000998643	-430.009		5.72
						5.74	6271.73	#REF!	18.8329	18.5	0	0	0	252.006	1.26003	117.152												184.802	622.02	0.000586659	-437.219		5.74
						5.76	6284.38	#REF!	18.8986	18.5	0	0	0	252.006	1.26003	118.412												184.802	629.277	0.000262916	-444.475		5.76
						5.78	6296.98	#REF!	18.9642	18.5	0	0	0	252.006	1.26003	119.672												184.803	636.581	0	-451.778		5.78
[truncated: 136 more columns]

## Sheet: Bridgeport_5
																																			0.267148	0.268488	0.269833	0.300466	0.301972	0.303485	0.305006	0.306535	0.308072	0.343842	0.345565	0.347297	0.349038	0.350788	0.352546
	INPUTS			ERROR CHECK		Surge height (m)	Wall Length (m)	sum of middleH * dL	Surge height (ft)	Rounding (ft)	Area (sq m)	Buildings	Building Values (million $)	Cum Value	Marginal Damage	Damage	2030	Expected Benefit (million $, PV)	Total Cost (million $, PV)	Residual Dam (million $, PV)	Net Benefit (million $, PV)	2080	Expected Benefit (million $, PV)	Total Cost (million $, PV)	Residual Dam (million $, PV)	Net Benefit (million $, PV)	2130	Expected Benefit (million $, PV)	Total Cost (million $, PV)	Residual Dam (million $, PV)	Net Benefit (million $, PV)		Surge height (m)		0	1	2	3	4	5	6	7	8	9	10	11	12	13	14
	SPATIAL DATA					1.84	512.434	#REF!	6.03704	6	0	0	0.25	0	0	0		0	1.60508	9.58629	-1.60508		0	0.804816	40.2512	-0.804816		0	0.211716	197.57	-0.211716		1.84		0	1	2	3	4	5	6	7	8	9	10	11	12	13	14
	Target City	Bridgeport				1.86	529.626	#REF!	6.10266	6	0	0	0.25	0.25	0.00125	0.00125		0.0215265	1.74981	9.56476	-1.72829		0.0554807	0.896526	40.1957	-0.841045		0	0.253229	197.57	-0.253229		1.86		0.000379143	0.000365152	0.000351677	0.000409664	0.000394546	0.000379987	0.000365965	0.00035246	0.000339453	0.000396142	0.000381524	0.000367445	0.000353886	0.000340827	0.000328249
	Policy Year (base year: 2020)	#REF!				1.88	546.93	#REF!	6.16828	6	0	0	0.25	0.5	0.0025	0.00375		0.0746502	1.90334	9.51164	-1.82869		0.239647	0.995145	40.0115	-0.755498		0	0.299631	197.57	-0.299631		1.88		0.000942443	0.000907665	0.000874171	0.0010161	0.000978604	0.000942491	0.000907711	0.000874215	0.000841955	0.000980781	0.000944588	0.000909731	0.00087616	0.000843828	0.000812689
	SLR rate (before policy)	3.14	mm/year			1.9	564.348	#REF!	6.2339	6	0	0	0.25	0.75	0.00375	0.0075		0.162151	2.06596	9.42414	-1.90381		0.606002	1.10095	39.6452	-0.49495		0	0.351192	197.57	-0.351192		1.9		0.00156581	0.00150803	0.00145238	0.00168382	0.00162169	0.00156184	0.00150421	0.0014487	0.00139524	0.00162177	0.00156192	0.00150429	0.00144878	0.00139531	0.00134382
	SLR rate (after policy)	#REF!	mm/year			1.92	581.876	#REF!	6.29952	6	0	0	0.25	1	0.005	0.0125		0.282423	2.23797	9.30387	-1.95555		1.19896	1.21423	39.0522	-0.0152641		0	0.408184	197.57	-0.408184		1.92		0.00217457	0.00209433	0.00201704	0.00233131	0.00224528	0.00216242	0.00208263	0.00200577	0.00193176	0.00223959	0.00215695	0.00207735	0.00200069	0.00192686	0.00185576
	MHHW	1.06	meter			1.94	599.516	#REF!	6.36514	6	0	0	0.25	1.25	0.00625	0.01875		0.431455	2.41966	9.15483	-1.98821		2.07086	1.33526	38.1803	0.735605		0	0.470881	197.57	-0.470881		1.94		0.00272785	0.00262719	0.00253024	0.00291392	0.00280639	0.00270283	0.00260309	0.00250703	0.00241451	0.00279071	0.00268772	0.00258854	0.00249302	0.00240102	0.00231242
						1.96	617.265	#REF!	6.43076	6	0	0	0.25	1.5	0.0075	0.02625		0.604163	2.61135	8.98213	-2.00718		3.21553	1.46433	37.0357	1.7512		0	0.539563	197.57	-0.539563		1.96		0.0032073	0.00308895	0.00297496	0.00341162	0.00328572	0.00316448	0.0030477	0.00293523	0.00282692	0.00325558	0.00313544	0.00301974	0.00290831	0.00280098	0.00269762
						1.98	635.122	#REF!	6.49638	6	0	0	0.25	1.75	0.00875	0.035		0.795233	2.81332	8.79106	-2.01808		4.58861	1.60173	35.6626	2.98688		0	0.614509	197.57	-0.614509		1.98		0.00360909	0.0034759	0.00334764	0.00382023	0.00367926	0.00354349	0.00341273	0.00328679	0.0031655	0.00363013	0.00349617	0.00336716	0.0032429	0.00312323	0.00300798
	GEV ESTIMATION					2	653.087	#REF!	6.562	6.5	0	0	0	1.75	0.00875	0.04375		0.993973	3.02588	8.59232	-2.03191		6.19004	1.74775	34.0611	4.44229		0	0.696003	197.57	-0.696003		2		0.00382886	0.00368757	0.00355149	0.00403013	0.00388141	0.00373818	0.00360023	0.00346738	0.00333942	0.00381086	0.00367023	0.0035348	0.00340435	0.00327873	0.00315774
	μ (location)	1.845				2.02	671.157	#REF!	6.62762	6.5	0	0	0	1.75	0.00875	0.0525		1.19309	3.24935	8.3932	-2.05625		0	1.90268	40.2512	-1.90268		0	0.784329	197.57	-0.784329		2.02		0.00392454	0.00377972	0.00364024	0.00410452	0.00395306	0.00380718	0.00366669	0.00353138	0.00340107	0.00385943	0.00371701	0.00357985	0.00344774	0.00332051	0.00319798
	σ (scale)	0.1544				2.04	689.331	#REF!	6.69324	6.5	0	0	0	1.75	0.00875	0.06125		1.38782	3.48401	8.19847	-2.0962		1.75	2.06681	38.5012	-0.316813		0.773301	0.879776	196.796	-0.106475		2.04		0.00393898	0.00379363	0.00365363	0.00409023	0.00393929	0.00379392	0.00365392	0.00351908	0.00338922	0.00382149	0.00368047	0.00354465	0.00341385	0.00328787	0.00316654
	k (shape)	0.0752				2.06	707.608	#REF!	6.75886	6.5	0	0	0	1.75	0.00875	0.07		1.57522	3.73019	8.01107	-2.15498		3.5	2.24045	36.7512	1.25955		3.07723	0.982634	194.493	2.0946		2.06		0.00390357	0.00375952	0.00362079	0.0040215	0.00387309	0.00373017	0.00359252	0.00345995	0.00333227	0.00373046	0.0035928	0.00346022	0.00333253	0.00320955	0.00309111
						2.08	725.985	#REF!	6.82448	6.5	0	0	0	1.75	0.00875	0.07875		1.7537	3.98819	7.83259	-2.23449		5.25	2.42388	35.0012	2.82612		6.72958	1.09319	190.84	5.63639		2.08		0.00384096	0.00369922	0.00356271	0.00392307	0.0037783	0.00363887	0.00350459	0.00337527	0.00325071	0.00361047	0.00347723	0.00334892	0.00322533	0.00310631	0.00299169
	Coefficients of the cost function					2.1	744.46	#REF!	6.8901	6.5	0	0	0	1.75	0.00875	0.0875		1.9226	4.25831	7.66369	-2.33571		6.92506	2.6174	33.3261	4.30766		11.5159	1.21175	186.054	10.3041		2.1		0.00376722	0.0036282	0.00349431	0.00381249	0.0036718	0.00353631	0.00340581	0.00328013	0.00315909	0.00347862	0.00335025	0.00322662	0.00310755	0.00299288	0.00288243
	coef1	1.16813				2.12	763.031	#REF!	6.95572	6.5	0	0	0	1.75	0.00875	0.09625		2.08193	4.54087	7.50436	-2.45894		8.44203	2.82131	31.8092	5.62072		17.2128	1.33859	180.357	15.8742		2.12		0.00369347	0.00355717	0.00342591	0.0037019	0.0035653	0.00343373	0.00330702	0.00318498	0.00306745	0.00334676	0.00322326	0.00310431	0.00298976	0.00287943	0.00277317
	coef2	0.00148324				2.14	781.696	#REF!	7.02134	7	0	0	0	1.75	0.00875	0.105		2.23212	4.83616	7.35417	-2.60404		9.80628	3.03591	30.4449	6.77038		23.2972	1.47402	174.273	21.8231		2.14		0.00362716	0.00349331	0.0033644	0.00359944	0.00346661	0.00333869	0.00321548	0.00309682	0.00298255	0.00322282	0.0031039	0.00298936	0.00287904	0.0027728	0.00267048
	coef3	-3.90834e-07				2.16	800.453	#REF!	7.08696	7	0	0	0	1.75	0.00875	0.11375		2.37388	5.1445	7.21241	-2.77062		11.0266	3.26149	29.2246	7.76513		29.9558	1.61834	167.614	28.3375		2.16		0.00357302	0.00344117	0.00331419	0.00351027	0.00338073	0.00325597	0.00313582	0.00302011	0.00290866	0.00311186	0.00299702	0.00288643	0.00277991	0.00267733	0.00257853
	coef4	1.07288e-10				2.18	819.297	#REF!	7.15258	7	0	0	0	1.75	0.00875	0.1225		2.50812	5.4662	7.07817	-2.95807		12.1139	3.49836	28.1373	8.6155		36.723	1.77184	160.847	34.9512		2.18		0.00353912	0.00340852	0.00328274	0.00343742	0.00331057	0.0031884	0.00307074	0.00295743	0.00284829	0.00301681	0.00290548	0.00279827	0.002695	0.00259555	0.00249977
	q	9.40139e+06				2.2	838.228	#REF!	7.2182	7	0	0	0	1.75	0.00875	0.13125		2.63567	5.80154	6.95062	-3.16587		13.0798	3.74682	27.1714	9.33296		43.7821	1.93482	153.788	41.8473		2.2		0.0034724	0.00334426	0.00322085	0.00338743	0.00326243	0.00314204	0.00302609	0.00291442	0.00280688	0.00293913	0.00283067	0.00272621	0.00262561	0.00252872	0.0024354
	Growth Rate	0.005	%/year			2.22	857.241	#REF!	7.28382	7	0	0	0	1.75	0.00875	0.14		2.75716	6.15085	6.82913	-3.39369		13.9364	4.00715	26.3147	9.92928		50.738	2.10757	146.832	48.6305		2.22		0.00337929	0.00325458	0.00313448	0.0033088	0.0031867	0.0030691	0.00295585	0.00284677	0.00274172	0.00288352	0.00277711	0.00267463	0.00257593	0.00248087	0.00238932
	discount rate	0.0426	%/year			2.24	876.333	#REF!	7.34944	7	0	0	0	1.75	0.00875	0.14875		2.87302	6.51441	6.71327	-3.64139		14.6957	4.27966	25.5555	10.416		57.7713	2.29041	139.798	55.4809		2.24		0.00326569	0.00314518	0.00302911	0.00320749	0.00308913	0.00297513	0.00286535	0.00275961	0.00265777	0.00280558	0.00270205	0.00260234	0.0025063	0.00241382	0.00232474
	useful_life	30	years			2.26	895.502	#REF!	7.41506	7	0	0	0	1.75	0.00875	0.1575		2.98353	6.89253	6.60276	-3.909		15.3688	4.56464	24.8824	10.8041		64.557	2.48363	133.013	62.0734		2.26		0.00313686	0.00302111	0.00290962	0.00308894	0.00297495	0.00286517	0.00275944	0.00265761	0.00255954	0.00271027	0.00261025	0.00251393	0.00242116	0.00233182	0.00224577
	CapEx	0.005				2.28	914.744	#REF!	7.48068	7	0	0	0	1.75	0.00875	0.16625		3.08893	7.2855	6.49736	-4.19657		15.9663	4.86239	24.2849	11.1039		71.2702	2.68753	126.3	68.5826		2.28		0.00299739	0.00288678	0.00278025	0.00295793	0.00284878	0.00274365	0.00264241	0.0025449	0.00245098	0.00260204	0.00250602	0.00241354	0.00232448	0.0022387	0.00215609
	Difference	0.02	meter			2.3	934.054	#REF!	7.5463	7.5	0	0	0	1.75	0.00875	0.175		3.18935	7.69362	6.39694	-4.50426		16.498	5.17319	23.7532	11.3248		77.6492	2.9024	119.921	74.7468		2.3		0.00285115	0.00274594	0.00264461	0.00281858	0.00271457	0.0026144	0.00251792	0.00242501	0.00233552	0.00248478	0.00239308	0.00230478	0.00221972	0.00213781	0.00205892
	Minimum height where buildings locate	8	ft			2.32	953.43	#REF!	7.61192	7.5	0	0	0	1.75	0.00875	0.18375		3.28491	8.11716	6.30138	-4.83225		16.9727	5.49733	23.2784	11.4754		83.3384	3.12855	114.231	80.2098		2.32		0.0027014	0.00260171	0.0025057	0.00267437	0.00257568	0.00248063	0.00238909	0.00230093	0.00221602	0.0023618	0.00227465	0.00219071	0.00210987	0.00203201	0.00195702
	A factor to account for other damages than buildings	2				2.34	972.867	#REF!	7.67754	7.5	0	0	0	1.75	0.00875	0.1925		3.37566	8.55643	6.21063	-5.18077		17.3984	5.83511	22.8528	11.5633		88.1841	3.36626	109.386	84.8179		2.34		0.00255078	0.00245665	0.002366	0.00252816	0.00243486	0.00234501	0.00225848	0.00217513	0.00209487	0.00223588	0.00215337	0.0020739	0.00199737	0.00192367	0.00185268
	Ratio of houses w/ basements	1	(1=All have basements; 0=No basements)			2.36	992.361	#REF!	7.74316	7.5	0	0	0	1.75	0.00875	0.20125		3.46166	9.0117	6.12463	-5.55004		17.7822	6.18681	22.469	11.5954		92.3531	3.61585	105.217	88.7373		2.36		0.00240143	0.00231281	0.00222746	0.00238227	0.00229436	0.00220969	0.00212815	0.00204962	0.00197398	0.00210927	0.00203143	0.00195647	0.00188427	0.00181474	0.00174777
	Average height of the first floor	0.9	meter			2.38	1011.91	#REF!	7.80878	7.5	0	0	0	1.75	0.00875	0.21		3.54296	9.48325	6.04333	-5.94029		18.1304	6.5527	22.1208	11.5776		95.9375	3.87759	101.632	92.0599		2.38		0.00225499	0.00217178	0.00209163	0.00223854	0.00215593	0.00207637	0.00199975	0.00192596	0.00185488	0.0019838	0.00191059	0.00184009	0.00177218	0.00170679	0.0016438
	Coastal length 12ft	2183				2.4	1031.5	#REF!	7.8744	7.5	0	0	0	1.75	0.00875	0.21875		3.61955	9.97135	5.96674	-6.3518		18.4481	6.93307	21.8031	11.515		99.0185	4.15178	98.5513	94.8667		2.4		0.00211274	0.00203478	0.00195969	0.00209838	0.00202095	0.00194637	0.00187455	0.00180537	0.00173875	0.00186087	0.0017922	0.00172606	0.00166237	0.00160102	0.00154194
	OUTPUTS	2030	2080	2130		2.42	1051.15	#REF!	7.94002	7.5	0	0	0	1.75	0.00875	0.2275		3.69149	10.4763	5.8948	-6.78478		18.7397	7.3282	21.5115	11.4115		101.667	4.4387	95.9025	97.2286		2.42		0.00197562	0.00190272	0.00183251	0.00196287	0.00189044	0.00182068	0.00175349	0.00168878	0.00162646	0.00174157	0.0016773	0.00161541	0.0015558	0.00149838	0.00144309
	Optimal Level of Flood Defense	No_Wall	2.36	3.3		2.44	1070.83	#REF!	8.00564	8	0	0	1.625	3.375	0.016875	0.244375		3.76118	10.9983	5.82511	-7.23709		19.0177	7.73834	21.2335	11.2794		104.024	4.73865	93.5454	99.2857		2.44		0.00190772	0.00183732	0.00176952	0.00189579	0.00182584	0.00175846	0.00169357	0.00163107	0.00157088	0.00168264	0.00162054	0.00156074	0.00150315	0.00144768	0.00139426
	Maximum height of Walls					2.46	1090.54	#REF!	8.07126	8	0	0	1.625	5	0.025	0.269375		3.83041	11.5376	5.75588	-7.70721		19.2912	8.16377	20.96	11.1274		106.182	5.0519	91.3874	101.13		2.46		0.00189022	0.00182047	0.00175329	0.00187857	0.00180925	0.00174248	0.00167818	0.00161625	0.00155661	0.00166769	0.00160615	0.00154688	0.0014898	0.00143482	0.00138187
	Average height of Walls	#VALUE!	1.044	1.724		2.48	1110.29	#REF!	8.13688	8	0	0	1.625	6.625	0.033125	0.3025		3.90042	12.0946	5.68587	-8.19414		19.5663	8.60474	20.6849	10.9616		108.201	5.37874	89.3686	102.822		2.48		0.00190803	0.00183762	0.00176981	0.00189624	0.00182626	0.00175887	0.00169396	0.00163145	0.00157125	0.00168352	0.00162139	0.00156156	0.00150394	0.00144844	0.00139499
	Average Elevation of wall	1.1	1.316	1.576		2.5	1130.06	#REF!	8.2025	8	0	0	1.625	8.25	0.04125	0.34375		3.97201	12.6693	5.61427	-8.69732		19.8475	9.06153	20.4037	10.7859		110.119	5.71945	87.4506	104.4		2.5		0.00194919	0.00187726	0.00180798	0.00193693	0.00186546	0.00179662	0.00173032	0.00166647	0.00160497	0.00171962	0.00165616	0.00159505	0.00153619	0.0014795	0.0014249
	Wall Length	No_Wall	992.361	1890.28		2.52	1149.85	#REF!	8.26812	8	0	0	1.625	9.875	0.049375	0.393125		4.04568	13.2622	5.54061	-9.21652		20.1373	9.53437	20.1138	10.603		111.961	6.07428	85.6091	105.886		2.52		0.00200434	0.00193037	0.00185914	0.00199137	0.00191789	0.00184712	0.00177895	0.00171331	0.00165008	0.00176777	0.00170254	0.00163971	0.0015792	0.00152093	0.0014648
	Cost of Wall	No_Wall	6.18681	33.3049		2.54	1169.66	#REF!	8.33374	8	0	0	1.625	11.5	0.0575	0.450625		4.12163	13.8734	5.46466	-9.75174		20.4375	10.0235	19.8137	10.414		113.742	6.44352	83.8282	107.298		2.54		0.0020663	0.00199005	0.00191661	0.00205242	0.00197669	0.00190374	0.00183349	0.00176583	0.00170067	0.00182163	0.00175441	0.00168967	0.00162732	0.00156727	0.00150943
	Expected Benefit	No_Wall	17.7822	177.173		2.56	1189.48	#REF!	8.39936	8	0	0	1.625	13.125	0.065625	0.51625		4.19988	14.5031	5.38641	-10.3032		20.7485	10.5292	19.5027	10.2193		115.472	6.82743	82.0975	108.645		2.56		0.00212965	0.00205106	0.00197537	0.0021147	0.00203667	0.00196151	0.00188913	0.00181941	0.00175227	0.00187644	0.0018072	0.00174051	0.00167628	0.00161442	0.00155485
	Net Benefit	#VALUE!	11.5954	143.868		2.58	1209.31	#REF!	8.46498	8	0	0	1.625	14.75	0.07375	0.59		4.28031	15.1516	5.30598	-10.8713		21.0701	11.0517	19.1811	10.0185		117.161	7.22626	80.4088	109.935		2.58		0.0021904	0.00210957	0.00203172	0.00217426	0.00209402	0.00201675	0.00194233	0.00187065	0.00180162	0.0019287	0.00185753	0.00178898	0.00172296	0.00165938	0.00159815
	Residual Damage	9.58629	22.469	20.3967		2.6	1229.14	#REF!	8.5306	8.5	0	0	2.125	16.875	0.084375	0.674375		4.363	15.819	5.22329	-11.456		21.403	11.5912	18.8482	9.81183		118.821	7.64028	78.7491	111.18		2.6		0.00225407	0.00217089	0.00209078	0.00223658	0.00215404	0.00207455	0.001998	0.00192427	0.00185326	0.00198328	0.00191009	0.00183961	0.00177172	0.00170634	0.00164337
	Expected Damage	9.58629	40.2512	197.57		2.62	1248.96	#REF!	8.59622	8.5	0	0	2.125	19	0.095	0.769375		4.44785	16.5057	5.13844	-12.0578		21.7469	12.1479	18.5043	9.59903		120.462	8.06973	77.1081	112.392		2.62		0.00231625	0.00223078	0.00214846	0.00229729	0.00221251	0.00213087	0.00205223	0.0019765	0.00190357	0.00203631	0.00196116	0.00188879	0.00181909	0.00175197	0.00168731
						2.64	1268.78	#REF!	8.66184	8.5	0	0	2.125	21.125	0.105625	0.875		4.53469	17.2117	5.0516	-12.677		22.1006	12.7221	18.1506	9.37848		122.092	8.51486	75.4776	113.577		2.64		0.00237377	0.00228617	0.00220181	0.00235325	0.00226641	0.00218277	0.00210223	0.00202465	0.00194994	0.00208501	0.00200807	0.00193397	0.0018626	0.00179387	0.00172767
	Surge height (ft)	Area submerged (sq m)	delta Area (sq m)	Building numbers	Building Values (million $)	2.66	1288.58	#REF!	8.72746	8.5	0	0	2.125	23.25	0.11625	0.99125		4.62323	17.9373	4.96306	-13.3141		22.4623	13.3139	17.7889	9.14835		123.718	8.97591	73.852	114.742		2.66		0.00242442	0.00233496	0.00224879	0.00240229	0.00231364	0.00222826	0.00214604	0.00206684	0.00199057	0.00212748	0.00204897	0.00197336	0.00190054	0.00183041	0.00176286
0.9144	3	654.64	0	0	0	2.68	1308.36	#REF!	8.79308	8.5	0	0	2.125	25.375	0.126875	1.11813		4.71314	18.6827	4.87315	-13.9695		22.8303	13.9237	17.4209	8.90663		125.342	9.45312	72.2276	115.889		2.68		0.00246678	0.00237575	0.00228808	0.00244302	0.00235287	0.00226604	0.00218242	0.00210189	0.00202432	0.0021625	0.0020827	0.00200584	0.00193182	0.00186054	0.00179188
1.0668	3.5	2614.9	1960.26		0	2.7	1328.12	#REF!	8.8587	8.5	0	0	2.125	27.5	0.1375	1.25562		4.80409	19.448	4.7822	-14.6439		23.2027	14.5515	17.0485	8.65122		126.967	9.94672	70.603	117.02		2.7		0.00250003	0.00240777	0.00231892	0.00247464	0.00238332	0.00229537	0.00221067	0.00212909	0.00205052	0.00218937	0.00210858	0.00203077	0.00195583	0.00188366	0.00181415
1.2192	4	2614.9	0		0	2.72	1347.86	#REF!	8.92432	8.5	0	0	2.125	29.625	0.148125	1.40375		4.89571	20.2334	4.69058	-15.3377		23.5776	15.1976	16.6735	8.38008		128.592	10.4569	68.9778	118.135		2.72		0.00252379	0.00243066	0.00234096	0.00249681	0.00240468	0.00231594	0.00223048	0.00214817	0.0020689	0.00220783	0.00212635	0.00204789	0.00197232	0.00189953	0.00182944
1.3716	4.5	2614.9	0		0	2.74	1367.56	#REF!	8.98994	8.5	0	0	2.125	31.75	0.15875	1.5625		4.98764	21.0392	4.59865	-16.0515		23.9533	15.8621	16.2979	8.09118		130.217	10.984	67.3528	119.233		2.74		0.00253807	0.00244441	0.00235421	0.00250955	0.00241694	0.00232775	0.00224185	0.00215912	0.00207945	0.00221789	0.00213604	0.00205722	0.0019813	0.00190819	0.00183777
1.524	5	3924.2	1309.3	0	0	2.76	1387.22	#REF!	9.05556	9	0	0	7.57143	39.3214	0.196607	1.75911		5.08098	21.8654	4.50531	-16.7844		24.3338	16.5453	15.9173	7.78854		131.865	11.5281	65.7046	120.337		2.76		0.0025831	0.00248778	0.00239597	0.00255263	0.00245843	0.00236771	0.00228034	0.00219619	0.00211515	0.00225471	0.00217151	0.00209138	0.0020142	0.00193987	0.00186829
1.6764	5.5	5884.4	1960.2	0	0	2.78	1406.84	#REF!	9.12118	9	0	0	7.57143	46.8929	0.234464	1.99357		5.17644	22.7121	4.40985	-17.5357		24.7218	17.2473	15.5293	7.47451		133.559	12.0894	64.0111	121.469		2.78		0.00264785	0.00255014	0.00245604	0.00261512	0.00251862	0.00242568	0.00233617	0.00224996	0.00216693	0.00230861	0.00222342	0.00214137	0.00206235	0.00198624	0.00191295
1.8288	6	9112.2	3227.8	0	2	2.8	1426.41	#REF!	9.1868	9	0	0	7.57143	54.4643	0.272321	2.26589		5.2744	23.5797	4.31189	-18.3053		25.1185	17.9683	15.1326	7.15021		135.299	12.6682	62.2707	122.631		2.8		0.00272374	0.00262323	0.00252643	0.00268852	0.00258931	0.00249376	0.00240173	0.0023131	0.00222775	0.00237205	0.00228451	0.00220021	0.00211902	0.00204082	0.00196551
1.9812	6.5	15962.5	6850.3	0	0	2.82	1445.93	#REF!	9.25242	9	0	0	7.57143	62.0357	0.310179	2.57607		5.375	24.4681	4.21129	-19.0931		25.5243	18.7085	14.7269	6.81576		137.09	13.2647	60.4799	123.825		2.82		0.00280415	0.00270067	0.00260101	0.00276628	0.0026642	0.00256588	0.0024712	0.00238001	0.00229218	0.00243924	0.00234923	0.00226254	0.00217905	0.00209864	0.00202119
2.1336	7	20062.1	4099.6	0	0	2.84	1465.4	#REF!	9.31804	9	0	0	7.57143	69.6071	0.348036	2.92411		5.47821	25.3775	4.10808	-19.8993		25.9386	19.468	14.3126	6.47062		138.93	13.879	58.6396	125.051		2.84		0.00288409	0.00277766	0.00267516	0.00284347	0.00273854	0.00263748	0.00254015	0.00244642	0.00235614	0.00250585	0.00241338	0.00232432	0.00223855	0.00215594	0.00207638
2.286	7.5	30776.6	10714.5	0	0	2.86	1484.8	#REF!	9.38366	9	0	0	7.57143	77.1786	0.385893	3.31		5.58386	26.3082	4.00243	-20.7243		26.3607	20.2469	13.8905	6.11372		140.816	14.5113	56.7539	126.305		2.86		0.00295985	0.00285063	0.00274543	0.00291645	0.00280883	0.00270518	0.00260535	0.00250921	0.00241661	0.00256866	0.00247387	0.00238258	0.00229466	0.00220998	0.00212843
2.4384	8	49286.7	18510.1	38.1216	13	2.88	1504.15	#REF!	9.44928	9	0	0	7.57143	84.75	0.42375	3.73375		5.69169	27.26	3.8946	-21.5683		26.7892	21.0455	13.462	5.74366		142.74	15.1619	54.8298	127.578		2.88		0.00302879	0.00291702	0.00280938	0.00298263	0.00287256	0.00276656	0.00266447	0.00256614	0.00247145	0.0026254	0.00252852	0.00243521	0.00234535	0.0022588	0.00217544
2.5908	8.5	72217.6	22930.9	47.2263	17	2.9	1523.42	#REF!	9.5149	9.5	0	0	6.125	90.875	0.454375	4.18813		5.80121	28.2333	3.78508	-22.4321		27.222	21.8639	13.0292	5.35809		144.69	15.8309	52.8799	128.859		2.9		0.00308376	0.00296997	0.00286037	0.00303498	0.00292298	0.00281512	0.00271123	0.00261118	0.00251483	0.00266991	0.00257138	0.00247649	0.00238511	0.00229709	0.00221232
2.7432	9	145907	73689	151.763	53	2.92	1542.63	#REF!	9.58052	9.5	0	0	6.125	97	0.485	4.67313		5.9119	29.2281	3.67439	-23.3162		27.6569	22.7021	12.5943	4.95478		146.653	16.5184	50.9168	130.135		2.92		0.00312508	0.00300976	0.0028987	0.00307384	0.0029604	0.00285116	0.00274595	0.00264462	0.00254703	0.0027025	0.00260278	0.00250673	0.00241422	0.00232514	0.00223933
2.8956	9.5	213404	67497.5	139.011	49	2.94	1561.76	#REF!	9.64614	9.5	0	0	6.125	103.125	0.515625	5.18875		6.02331	30.2445	3.56298	-24.2212		28.092	23.5604	12.1592	4.53164		148.618	17.2247	48.9518	131.393		2.94		0.00315329	0.00303693	0.00292486	0.00309976	0.00298538	0.00287521	0.00276911	0.00266692	0.00256851	0.0027237	0.00262319	0.00252639	0.00243316	0.00234337	0.0022569
3.048	10	274457	61053.1	125.739	44	2.96	1580.81	#REF!	9.71176	9.5	0	0	6.125	109.25	0.54625	5.735		6.13499	31.2826	3.4513	-25.1476		28.5256	24.4388	11.7256	4.08674		150.574	17.9499	46.9953	132.625		2.96		0.0031691	0.00305215	0.00293952	0.00311348	0.00299859	0.00288794	0.00278137	0.00267873	0.00257988	0.00273415	0.00263326	0.00253608	0.0024425	0.00235236	0.00226556
3.2004	10.5	335430	60973	125.574	44	2.98	1599.79	#REF!	9.77738	9.5	0	0	6.125	115.375	0.576875	6.31188		6.24653	32.3425	3.33976	-26.096		28.9559	25.3375	11.2953	3.61833		152.513	18.6941	45.0568	133.819		2.98		0.00317332	0.00305622	0.00294344	0.00311582	0.00300084	0.0028901	0.00278345	0.00268074	0.00258181	0.00273461	0.00263369	0.0025365	0.0024429	0.00235276	0.00226593
3.3528	11	385045	49614.7	102.182	36	3	1618.67	#REF!	9.843	9.5	0	0	6.125	121.5	0.6075	6.91938		6.35756	33.4243	3.22873	-27.0668		29.3815	26.2567	10.8697	3.12485		154.426	19.4575	43.1442	134.968		3		0.00316684	0.00304998	0.00293743	0.00310766	0.00299298	0.00288254	0.00277617	0.00267372	0.00257505	0.00272586	0.00262527	0.00252839	0.00243509	0.00234523	0.00225869
3.5052	11.5	434065	49019.7	100.956	35	3.02	1637.48	#REF!	9.90862	9.5	0	0	6.125	127.625	0.638125	7.5575		6.46774	34.5281	3.11855	-28.0604		29.8012	27.1963	10.45	2.60489		156.305	20.2403	41.2648	136.065		3.02		0.00315059	0.00303432	0.00292235	0.00308993	0.00297591	0.00286609	0.00276033	0.00265847	0.00256036	0.00270875	0.00260879	0.00251252	0.0024198	0.00233051	0.00224451
3.6576	12	468548	34483.5	71.0189	25	3.04	1656.19	#REF!	9.97424	9.5	0	0	6.125	133.75	0.66875	8.22625		6.57676	35.654	3.00953	-29.0773		30.2138	28.1566	10.0374	2.05723		158.145	21.0426	39.4245	137.103		3.04		0.00312548	0.00301014	0.00289906	0.00306356	0.00295051	0.00284163	0.00273677	0.00263578	0.00253851	0.00268408	0.00258504	0.00248964	0.00239777	0.00230929	0.00222407
3.81	12.5	490109	21561.3	42	16	3.06	1674.81	#REF!	10.0399	10	0	0	5.5	139.25	0.69625	8.9225		6.68432	36.8021	2.90197	-30.1178		30.6182	29.1376	9.63294	1.48068		159.941	21.8645	37.6289	138.076		3.06		0.00309136	0.00297728	0.00286741	0.0030284	0.00291664	0.00280901	0.00270536	0.00260552	0.00250938	0.00265176	0.00255391	0.00245966	0.0023689	0.00228148	0.00219729
3.9624	13	504209	14099.9	28	12	3.08	1693.33	#REF!	10.1055	10	0	0	5.5	144.75	0.72375	9.64625		6.79016	37.9724	2.79613	-31.1822		31.0136	30.1394	9.23757	0.874217		161.687	22.7062	35.8824	138.981		3.08		0.00304939	0.00293686	0.00282849	0.00298561	0.00287543	0.00276932	0.00266713	0.00256871	0.00247392	0.00261281	0.00251639	0.00242353	0.0023341	0.00224797	0.00216501
4.1148	13.5	530019	25809.3	53.1544	19	3.1	1711.76	#REF!	10.1711	10	0	0	5.5	150.25	0.75125	10.3975		6.89405	39.165	2.69224	-32.2709		31.3992	31.1621	8.85202	0.237014		163.381	23.5678	34.1885	139.813		3.1		0.00300067	0.00288994	0.0027833	0.00293627	0.00282791	0.00272356	0.00262305	0.00252626	0.00243303	0.00256819	0.00247341	0.00238214	0.00229424	0.00220957	0.00212804
4.2672	14	544953	14934.3	30.7573	7	3.12	1730.08	#REF!	10.2367	10	0	0	5.5	155.75	0.77875	11.1763		6.99581	40.3799	2.59048	-33.3841		31.7743	32.2059	8.47686	-0.431608		165.02	24.4495	32.5499	140.57		3.12		0.00294619	0.00283747	0.00273276	0.00288136	0.00277503	0.00267262	0.002574	0.00247901	0.00238753	0.00251875	0.00242581	0.00233629	0.00225008	0.00216704	0.00208708
4.4196	14.5	554699	9746.4	20.0728	7	3.14	1748.31	#REF!	10.3023	10	0	0	5.5	161.25	0.80625	11.9825		7.09527	41.6173	2.49102	-34.5221		32.1387	33.2708	8.11253	-1.13219		166.601	25.3513	30.9683	141.25		3.14		0.00288685	0.00278032	0.00267772	0.00282178	0.00271765	0.00261736	0.00252078	0.00242776	0.00233817	0.00246531	0.00237433	0.00228672	0.00220233	0.00212106	0.00204279
4.572	15	572954	18254.3	37.5948	13	3.16	1766.43	#REF!	10.368	10	0	0	5.5	166.75	0.83375	12.8163		7.19232	42.8773	2.39397	-35.685		32.4918	34.3569	7.75937	-1.86513		168.125	26.2733	29.4449	141.851		3.16		0.0028235	0.0027193	0.00261896	0.00275835	0.00265656	0.00255853	0.00246412	0.00237319	0.00228561	0.00240857	0.00231969	0.00223409	0.00215165	0.00207225	0.00199578
4.7244	15.5	581002	8048.6	16.5761	6	3.18	1784.45	#REF!	10.4336	10	0	0	5.5	172.25	0.86125	13.6775		7.28685	44.1598	2.29944	-36.8729		32.8336	35.4643	7.4176	-2.63076		169.589	27.2158	27.9803	142.374		3.18		0.00275687	0.00265514	0.00255716	0.00269181	0.00259248	0.00249681	0.00240467	0.00231594	0.00223047	0.00234919	0.0022625	0.00217901	0.0020986	0.00202116	0.00194658
4.8768	16	593036	12033.5	24.783	9	3.2	1802.36	#REF!	10.4992	10	0	0	5.5	177.75	0.88875	14.5663		7.37878	45.4649	2.20751	-38.0861		33.1638	36.5931	7.08734	-3.42927		170.995	28.1788	26.5746	142.816		3.2		0.00268765	0.00258847	0.00249295	0.00262282	0.00252603	0.00243282	0.00234304	0.00225658	0.00217331	0.00228775	0.00220333	0.00212202	0.00204372	0.0019683	0.00189566
5.0292	16.5	605799	12763.5	26.2865	9	3.22	1820.16	#REF!	10.5648	10.5	0	0	6.28571	184.036	0.920179	15.4864		7.4681	46.7927	2.11819	-39.3246		33.4826	37.7433	6.76855	-4.26071		172.343	29.1623	25.227	143.18		3.22		0.0026171	0.00252052	0.00242751	0.00255263	0.00245843	0.00236771	0.00228034	0.00219619	0.00211514	0.00222534	0.00214322	0.00206413	0.00198796	0.0019146	0.00184395
5.1816	17	621327	15527.6	31.9792	11	3.24	1837.86	#REF!	10.6304	10.5	0	0	6.28571	190.321	0.951607	16.438		7.55478	48.1433	2.03151	-40.5885		33.79	38.9151	6.46117	-5.12509		173.633	30.1666	23.9366	143.467		3.24		0.0025456	0.00245166	0.00236119	0.00248159	0.00239002	0.00230182	0.00221688	0.00213507	0.00205628	0.00216227	0.00208247	0.00200563	0.00193161	0.00186033	0.00179168
5.334	17.5	640571	19243.9	39.6329	14	3.26	1855.44	#REF!	10.6961	10.5	0	0	6.28571	196.607	0.983036	17.4211		7.6388	49.5166	1.94749	-41.8778		34.0861	40.1085	6.16506	-6.02235		174.867	31.1918	22.7023	143.676		3.26		0.0024735	0.00238222	0.00229432	0.00241005	0.00232112	0.00223547	0.00215297	0.00207352	0.00199701	0.00209884	0.00202138	0.00194679	0.00187495	0.00180576	0.00173913
5.4864	18	655536	14965	30.8205	11	3.28	1872.92	#REF!	10.7617	10.5	0	0	6.28571	202.893	1.01446	18.4355		7.72019	50.9128	1.8661	-43.1927		34.3711	41.3235	5.88008	-6.95241		176.047	32.2378	21.5229	143.809		3.28		0.00240111	0.00231251	0.00222717	0.00233832	0.00225203	0.00216893	0.00208889	0.00201181	0.00193757	0.00203531	0.0019602	0.00188787	0.0018182	0.00175111	0.00168649
						3.3	1890.28	#REF!	10.8273	10.5	0	0	6.28571	209.179	1.04589	19.4814		7.79894	52.332	1.78735	-44.533		34.6452	42.5603	5.60602	-7.91516		177.173	33.3049	20.3967	143.868		3.3		0.00232872	0.00224279	0.00216002	0.00226667	0.00218303	0.00210247	0.00202489	0.00195016	0.0018782	0.00197194	0.00189917	0.00182908	0.00176159	0.00169658	0.00163397
					227.624	3.32	1907.53	#REF!	10.8929	10.5	0	0	6.28571	215.464	1.07732	20.5587		7.87508	53.774	1.71121	-45.8989		34.9085	43.8189	5.34268	-8.91044		178.247	34.3931	19.3224	143.854		3.32		0.00225659	0.00217331	0.00209311	0.00219536	0.00211434	0.00203632	0.00196118	0.00188881	0.0018191	0.00190892	0.00183848	0.00177064	0.0017053	0.00164237	0.00158176
						3.34	1924.66	#REF!	10.9585	10.5	0	0	6.28571	221.75	1.10875	21.6675		7.94865	55.2391	1.63764	-47.2904		35.1614	45.0995	5.08982	-9.9381		179.271	35.5026	18.2983	143.769		3.34		0.00218493	0.00210431	0.00202665	0.00212459	0.00204619	0.00197068	0.00189796	0.00182792	0.00176047	0.00184646	0.00177832	0.0017127	0.0016495	0.00158863	0.00153001
						3.36	1941.68	#REF!	11.0242	11	0	0	4.5	226.25	1.13125	22.7987		8.01964	56.7272	1.56665	-48.7075		35.4039	46.4019	4.84729	-10.998		180.247	36.6333	17.3231	143.613		3.36		0.00211314	0.00203516	0.00196006	0.00205377	0.00197798	0.00190499	0.00183469	0.00176699	0.00170179	0.00178403	0.00171819	0.00165479	0.00159372	0.00153491	0.00147827
12 foot wall						3.38	1958.59	#REF!	11.0898	11	0	0	4.5	230.75	1.15375	23.9525		8.08809	58.2384	1.4982	-50.1503		35.6363	47.7264	4.61488	-12.0901		181.174	37.7855	16.3953	143.389		3.38		0.00204159	0.00196625	0.00189369	0.00198326	0.00191008	0.00183959	0.00177171	0.00170633	0.00164336	0.00172193	0.00165839	0.00159719	0.00153825	0.00148149	0.00142682
4.76	Cost	223.864				3.4	1975.38	#REF!	11.1554	11	0	0	4.5	235.25	1.17625	25.1287		8.15401	59.7727	1.43228	-51.6187		35.8588	49.073	4.39235	-13.2142		182.056	38.9591	15.5133	143.097		3.4		0.0019706	0.00189788	0.00182784	0.00191338	0.00184277	0.00177477	0.00170927	0.0016462	0.00158545	0.00166044	0.00159917	0.00154016	0.00148332	0.00142858	0.00137587
4.976	Cost	229.724				3.42	1992.06	#REF!	11.221	11	0	0	4.5	239.75	1.19875	26.3275		8.21745	61.3302	1.36884	-53.1127		36.0717	50.4417	4.17947	-14.37		182.894	40.1543	14.6756	142.74		3.42		0.00190044	0.00183031	0.00176276	0.00184437	0.00177631	0.00171076	0.00164763	0.00158683	0.00152827	0.00159979	0.00154075	0.0014839	0.00142914	0.0013764	0.00132561
5.236	Cost	239.241				3.44	2008.62	#REF!	11.2866	11	0	0	4.5	244.25	1.22125	27.5487		8.27846	62.9109	1.30783	-54.6325		36.2752	51.8326	3.97595	-15.5574		183.689	41.3712	13.8805	142.318		3.44		0.00183133	0.00176375	0.00169867	0.00177647	0.00171091	0.00164778	0.00158697	0.00152841	0.00147201	0.00154015	0.00148332	0.00142858	0.00137586	0.00132509	0.00127619
						3.46	2025.07	#REF!	11.3523	11	0	0	4.5	248.75	1.24375	28.7925		8.33709	64.5149	1.2492	-56.1778		36.4697	53.2458	3.78151	-16.7762		184.444	42.6099	13.1261	141.834		3.46		0.00176347	0.0016984	0.00163572	0.00170984	0.00164675	0.00158598	0.00152745	0.00147109	0.0014168	0.00148169	0.00142701	0.00137435	0.00132364	0.00127479	0.00122775
						3.48	2041.4	#REF!	11.4179	11	0	0	4.5	253.25	1.26625	30.0587		8.3934	66.1422	1.19289	-57.7488		36.6553	54.6814	3.59584	-18.026		185.159	43.8703	12.411	141.288		3.48		0.00169701	0.00163439	0.00157408	0.00164464	0.00158395	0.0015255	0.00146921	0.00141499	0.00136278	0.00142453	0.00137196	0.00132133	0.00127257	0.00122561	0.00118038
						3.5	2057.62	#REF!	11.4835	11	0	0	4.5	257.75	1.28875	31.3475		8.44744	67.7928	1.13885	-59.3454		36.8325	56.1393	3.41864	-19.3067		185.837	45.1527	11.7332	140.684		3.5		0.00163208	0.00157185	0.00151385	0.00158099	0.00152265	0.00146646	0.00141234	0.00136023	0.00131003	0.00136876	0.00131825	0.0012696	0.00122275	0.00117763	0.00113417
						3.52	2073.72	#REF!	11.5491	11.5	0	0	5	262.75	1.31375	32.6612		8.49929	69.4669	1.087	-60.9676		37.0016	57.6196	3.2496	-20.618		186.479	46.4571	11.0911	140.022		3.52		0.00156888	0.00151099	0.00145523	0.00151909	0.00146303	0.00140904	0.00135704	0.00130697	0.00125874	0.00131456	0.00126605	0.00121933	0.00117434	0.001131	0.00108927
						3.54	2089.71	#REF!	11.6147	11.5	0	0	5	267.75	1.33875	34		8.54901	71.1643	1.03728	-62.6153		37.1628	59.1224	3.08839	-21.9596		187.087	47.7835	10.483	139.303		3.54		0.00150748	0.00145185	0.00139828	0.00145898	0.00140514	0.00135329	0.00130335	0.00125525	0.00120893	0.00126198	0.00121541	0.00117056	0.00112736	0.00108576	0.00104569
						3.56	2105.59	#REF!	11.6804	11.5	0	0	5	272.75	1.36375	35.3637		8.59667	72.8853	0.989617	-64.2886		37.3165	60.6478	2.9347	-23.3314		187.663	49.1321	9.90719	138.53		3.56		0.0014479	0.00139447	0.00134301	0.00140069	0.001349	0.00129922	0.00125128	0.00120511	0.00116063	0.00121102	0.00116633	0.00112329	0.00108184	0.00104192	0.00100347
						3.58	2121.35	#REF!	11.746	11.5	0	0	5	277.75	1.38875	36.7525		8.64235	74.6297	0.94394	-65.9874		37.463	62.1958	2.78822	-24.7329		188.208	50.5029	9.36215	137.705		3.58		0.00139016	0.00133886	0.00128945	0.00134425	0.00129464	0.00124687	0.00120085	0.00115654	0.00111386	0.0011617	0.00111883	0.00107755	0.00103778	0.000999486	0.000962603
						3.6	2137	#REF!	11.8116	11.5	0	0	5	282.75	1.41375	38.1662		8.68611	76.3977	0.900183	-67.7116		37.6025	63.7665	2.64865	-26.164		188.723	51.896	8.84632	136.827		3.6		0.00133427	0.00128503	0.00123761	0.00128964	0.00124205	0.00119622	0.00115207	0.00110956	0.00106861	0.00111402	0.00107291	0.00103332	0.00099519	0.000958465	0.000923096
						3.62	2152.54	#REF!	11.8772	11.5	0	0	5	287.75	1.43875	39.605		8.72801	78.1893	0.858276	-69.4613		37.7355	65.3599	2.5157	-27.6244		189.212	53.3114	8.35821	135.9		3.62		0.00128022	0.00123298	0.00118748	0.00123687	0.00119123	0.00114727	0.00110493	0.00106416	0.00102489	0.00106798	0.00102857	0.000990611	0.000954056	0.000918849	0.000884942
						3.64	2167.96	#REF!	11.9428	11.5	0	0	5	292.75	1.46375	41.0687		8.76814	80.0045	0.818153	-71.2364		37.8621	66.976	2.38907	-29.1139		189.673	54.7493	7.8964	134.924		3.64		0.00122802	0.0011827	0.00113906	0.00118593	0.00114217	0.00110002	0.00105943	0.00102033	0.000982678	0.00102355	0.00098578	0.000949403	0.000914368	0.000880626	0.00084813
						3.66	2183.27	#REF!	12.0085	12	0	0	3.125	295.875	1.47937	42.5481		8.80654	81.8434	0.779754	-73.0369		37.9827	68.615	2.26851	-30.6323		190.11	56.2097	7.45962	133.9		3.66		0.00117737	0.00113392	0.00109208	0.00113654	0.0010946	0.00105421	0.0010153	0.000977837	0.000941753	0.000980507	0.000944325	0.000909478	0.000875916	0.000843593	0.000812463
						3.68	2198.47	#REF!	12.0741	12	0	0	3.125	299	1.495	44.0431		8.84327	83.706	0.743021	-74.8628		38.0974	70.2769	2.15379	-32.1795		190.523	57.6927	7.04664	132.83		3.68		0.00112831	0.00108668	0.00104658	0.00108873	0.00104856	0.00100986	0.000972598	0.000936707	0.000902141	0.00093887	0.000904224	0.000870856	0.00083872	0.00080777	0.000777961
						3.7	2213.57	#REF!	12.1397	12	0	0	3.125	302.125	1.51062	45.5537		8.8784	85.5924	0.707895	-76.714		38.2065	71.9616	2.04464	-33.7551		190.913	59.1984	6.65626	131.715		3.7		0.00108087	0.00104099	0.00100257	0.00104253	0.00100406	0.000967005	0.000931321	0.000896953	0.000863854	0.000898651	0.000865489	0.00083355	0.000802791	0.000773166	0.000744635
						3.72	2228.55	#REF!	12.2053	12	0	0	3.125	305.25	1.52625	47.08		8.91197	87.5025	0.674317	-78.5906		38.3104	73.6694	1.94083	-35.359		191.282	60.7267	6.28733	130.556		3.72		0.00103505	0.000996859	0.000960073	0.000997927	0.000961102	0.000925635	0.000891478	0.00085858	0.000826897	0.000859851	0.000828121	0.000797562	0.00076813	0.000739785	0.000712485
						3.74	2243.42	#REF!	12.2709	12	0	0	3.125	308.375	1.54187	48.6219		8.94406	89.4365	0.642229	-80.4925		38.4091	75.4002	1.84211	-36.9911		191.631	62.2779	5.93874	129.353		3.74		0.000990853	0.000954289	0.000919074	0.000954926	0.000919688	0.00088575	0.000853064	0.000821584	0.000791266	0.000822465	0.000792114	0.000762884	0.000734732	0.000707619	0.000681506
						3.76	2258.19	#REF!	12.3366	12	0	0	3.125	311.5	1.5575	50.1794		8.97472	91.3944	0.611573	-82.4196		38.5029	77.154	1.74827	-38.6511		191.96	63.8519	5.60941	128.108		3.76		0.000948259	0.000913267	0.000879565	0.000913512	0.000879802	0.000847336	0.000816067	0.000785953	0.00075695	0.000786478	0.000757456	0.000729504	0.000702584	0.000676657	0.000651687
						3.78	2272.85	#REF!	12.4022	12	0	0	3.125	314.625	1.57312	51.7525		9.004	93.3761	0.582292	-84.3721		38.5921	78.931	1.65908	-40.3389		192.271	65.4488	5.29832	126.823		3.78		0.000907254	0.000873775	0.000841531	0.000873664	0.000841425	0.000810374	0.00078047	0.000751669	0.000723931	0.000751871	0.000724126	0.000697404	0.000671669	0.000646883	0.000623012
						3.8	2287.4	#REF!	12.4678	12	0	0	3.125	317.75	1.58875	53.3412		9.03196	95.3818	0.554332	-86.3499		38.6769	80.7312	1.57432	-42.0543		192.565	67.0687	5.00449	125.497		3.8		0.000867813	0.000835789	0.000804947	0.000835357	0.000804531	0.000774842	0.000746249	0.000718711	0.000692189	0.000718621	0.000692102	0.000666562	0.000641965	0.000618275	0.00059546
						3.82	2301.85	#REF!	12.5334	12.5	0	0	2	319.75	1.59875	54.94		9.05865	97.4115	0.52764	-88.3529		38.7574	82.5546	1.49379	-43.7972		192.843	68.7117	4.72702	124.131		3.82		0.000829823	0.000799201	0.000769709	0.000798479	0.000769013	0.000740635	0.000713304	0.000686982	0.000661631	0.000686627	0.000661289	0.000636886	0.000613384	0.000590749	0.000568949
						3.84	2316.19	#REF!	12.599	12.5	0	0	2	321.75	1.60875	56.5487		9.08412	99.4653	0.502165	-90.3812		38.8339	84.4013	1.4173	-45.5674		193.105	70.3777	4.46503	122.727		3.84		0.000793268	0.000763995	0.000735802	0.000763012	0.000734855	0.000707738	0.000681621	0.000656468	0.000632243	0.000655875	0.000631672	0.000608362	0.000585912	0.000564291	0.000543467
						3.86	2330.43	#REF!	12.6647	12.5	0	0	2	323.75	1.61875	58.1675		9.10843	101.543	0.477859	-92.4347		38.9065	86.2713	1.34466	-47.3648		193.352	72.067	4.2177	121.285		3.86		0.000758127	0.000730151	0.000703207	0.000728935	0.000702036	0.000676129	0.000651179	0.000627149	0.000604006	0.000626343	0.000603229	0.000580969	0.00055953	0.000538882	0.000518997
						3.88	2344.57	#REF!	12.7303	12.5	0	0	2	325.75	1.62875	59.7962		9.13162	103.645	0.454672	-94.5134		38.9755	88.1647	1.27568	-49.1892		193.586	73.7795	3.98422	119.806		3.88		0.000724375	0.000697644	0.000671899	0.000696221	0.000670529	0.000645785	0.000621955	0.000599003	0.000576899	0.000598006	0.000575938	0.000554685	0.000534216	0.000514503	0.000495517
						3.9	2358.6	#REF!	12.7959	12.5	0	0	2	327.75	1.63875	61.435		9.15373	105.771	0.432557	-96.6173		39.041	90.0816	1.2102	-51.0406		193.806	75.5154	3.76383	118.291		3.9		0.000691981	0.000666446	0.000641853	0.000664839	0.000640306	0.000616677	0.00059392	0.000572004	0.000550896	0.000570837	0.000549772	0.000529484	0.000509945	0.000491127	0.000473004
						3.92	2372.54	#REF!	12.8615	12.5	0	0	2	329.75	1.64875	63.0837		9.17482	107.921	0.411468	-98.7465		39.1032	92.0219	1.14803	-52.9187		194.014	77.2746	3.55582	116.739		3.92		0.000660914	0.000636525	0.000613036	0.000634757	0.000611333	0.000588774	0.000567047	0.000546122	0.000525969	0.000544806	0.000524701	0.000505339	0.000486691	0.000468731	0.000451434
						3.94	2386.37	#REF!	12.9271	12.5	0	0	2	331.75	1.65875	64.7425		9.19493	110.096	0.391361	-100.901		39.1622	93.9857	1.08902	-54.8236		194.21	79.0572	3.3595	115.153		3.94		0.000631138	0.000607847	0.000585417	0.000605938	0.000583578	0.000562043	0.000541303	0.000521327	0.000502089	0.000519879	0.000500695	0.000482218	0.000464424	0.000447285	0.00043078
						3.96	2400.11	#REF!	12.9928	12.5	0	0	2	333.75	1.66875	66.4112		9.2141	112.295	0.372192	-103.081		39.2182	95.9732	1.03302	-56.755		194.396	80.8633	3.17422	113.532		3.96		0.000602615	0.000580378	0.00055896	0.000578346	0.000557004	0.00053645	0.000516654	0.000497588	0.000479226	0.000496025	0.000477721	0.000460092	0.000443114	0.000426762	0.000411014
						3.98	2413.75	#REF!	13.0584	13	0	0	1.71429	335.464	1.67732	68.0886		9.23237	114.518	0.353919	-105.285		39.2713	97.9842	0.97987	-58.7129		194.57	82.693	2.99935	111.877		3.98		0.000575296	0.000554067	0.000533621	0.00055193	0.000531563	0.000511947	0.000493055	0.000474861	0.000457338	0.000473199	0.000455737	0.000438919	0.000422722	0.000407123	0.000392099
						4	2427.29	#REF!	13.124	13	0	0	1.71429	337.179	1.68589	69.7745		9.24979	116.765	0.336504	-107.515		39.3218	100.019	0.929432	-60.6972		194.735	84.5463	2.83431	110.189		4		0.000549144	0.00052888	0.000509363	0.000526654	0.00050722	0.000488502	0.000470475	0.000453114	0.000436393	0.000451367	0.000434711	0.000418669	0.000403219	0.00038834	0.000374009
						4.02	2440.73	#REF!	13.1896	13	0	0	1.71429	338.893	1.69446	71.4689		9.26638	119.037	0.319906	-109.771		39.3696	102.077	0.881571	-62.7078		194.891	86.4233	2.67856	108.468		4.02		0.000524121	0.00050478	0.000486153	0.00050248	0.000483937	0.000466079	0.00044888	0.000432315	0.000416362	0.000430496	0.00041461	0.00039931	0.000384575	0.000370383	0.000356716
						4.04	2454.08	#REF!	13.2552	13	0	0	1.71429	340.607	1.70304	73.172		9.2822	121.333	0.30409	-112.051		39.415	104.16	0.836157	-64.7446		195.038	88.324	2.53156	106.714		4.04		0.000500189	0.000481731	0.000463954	0.00047937	0.00046168	0.000444643	0.000428235	0.000412432	0.000397213	0.000410553	0.000395403	0.000380812	0.000366759	0.000353225	0.00034019
						4.06	2467.34	#REF!	13.3209	13	0	0	1.71429	342.321	1.71161	74.8836		9.29727	123.654	0.289019	-114.357		39.4581	106.266	0.793065	-66.8076		195.177	90.2486	2.39282	104.928		4.06		0.00047731	0.000459696	0.000442733	0.000457286	0.000440411	0.000424159	0.000408507	0.000393432	0.000378914	0.000391504	0.000377056	0.000363142	0.000349742	0.000336835	0.000324406
						4.08	2480.5	#REF!	13.3865	13	0	0	1.71429	344.036	1.72018	76.6038		9.31163	125.999	0.27466	-116.688		39.499	108.396	0.752177	-68.8967		195.308	92.197	2.26187	103.111		4.08		0.000455445	0.000438638	0.000422452	0.00043619	0.000420094	0.000404591	0.000389661	0.000375282	0.000361433	0.000373314	0.000359538	0.00034627	0.000333492	0.000321186	0.000309334
						4.1	2493.58	#REF!	13.4521	13	0	0	1.71429	345.75	1.72875	78.3325		9.32531	128.369	0.260978	-119.044		39.5378	110.55	0.713381	-71.0117		195.431	94.1693	2.13826	101.262		4.1		0.000434556	0.000418521	0.000403076	0.000416044	0.000400691	0.000385905	0.000371664	0.000357949	0.00034474	0.000355951	0.000342816	0.000330166	0.000317982	0.000306248	0.000294947
						4.12	2506.56	#REF!	13.5177	13.5	0	0	2.375	348.125	1.74063	80.0731		9.33835	130.764	0.247943	-121.425		39.5746	112.727	0.676567	-73.1528		195.548	96.1656	2.02157	99.3826		4.12		0.000414624	0.000399323	0.000384588	0.000396828	0.000382185	0.000368081	0.000354498	0.000341417	0.000328818	0.000339397	0.000326872	0.00031481	0.000303193	0.000292005	0.000281229
						4.14	2519.45	#REF!	13.5833	13.5	0	0	2.375	350.5	1.7525	81.8256		9.35077	133.183	0.235522	-123.832		39.6096	114.929	0.641632	-75.3197		195.658	98.1859	1.91141	97.4724		4.14		0.000395607	0.000381008	0.000366948	0.000378502	0.000364535	0.000351083	0.000338127	0.00032565	0.000313632	0.000323615	0.000311673	0.000300171	0.000289095	0.000278426	0.000268152
						4.16	2532.25	#REF!	13.649	13.5	0	0	2.375	352.875	1.76438	83.59		9.3626	135.627	0.223688	-126.264		39.6427	117.155	0.608479	-77.5124		195.762	100.23	1.80739	95.532		4.16		0.000377466	0.000363536	0.000350121	0.000361027	0.000347705	0.000334874	0.000322516	0.000310615	0.000299153	0.000308572	0.000297185	0.000286218	0.000275656	0.000265484	0.000255687
						4.18	2544.96	#REF!	13.7146	13.5	0	0	2.375	355.25	1.77625	85.3663		9.37388	138.095	0.212411	-128.721		39.6742	119.405	0.577013	-79.731		195.861	102.299	1.70915	93.5616		4.18		0.000360163	0.000346872	0.000334072	0.000344366	0.000331659	0.00031942	0.000307633	0.00029628	0.000285347	0.000294235	0.000283378	0.00027292	0.000262849	0.00025315	0.000243808
						4.2	2557.59	#REF!	13.7802	13.5	0	0	2.375	357.625	1.78812	87.1544		9.38462	140.589	0.201666	-131.204		39.704	121.679	0.547147	-81.9753		195.953	104.392	1.61638	91.5616		4.2		0.000343662	0.00033098	0.000318766	0.000328483	0.000316362	0.000304687	0.000293444	0.000282615	0.000272186	0.000280574	0.00027022	0.000260248	0.000250645	0.000241395	0.000232487
						4.22	2570.13	#REF!	13.8458	13.5	0	0	2.375	360	1.8	88.9544		9.39486	143.107	0.191426	-133.712		39.7324	123.978	0.518797	-84.2454		196.041	106.509	1.52874	89.5321		4.22		0.000327926	0.000315825	0.000304171	0.000313343	0.00030178	0.000290644	0.000279919	0.000269589	0.000259641	0.000267556	0.000257683	0.000248174	0.000239016	0.000230195	0.000221701
						4.24	2582.58	#REF!	13.9114	13.5	0	0	2.375	362.375	1.81188	90.7662		9.40462	145.65	0.181668	-136.245		39.7593	126.3	0.491884	-86.5412		196.124	108.65	1.44594	87.4735		4.24		0.000312923	0.000301376	0.000290254	0.000298913	0.000287883	0.000277259	0.000267028	0.000257174	0.000247684	0.000255153	0.000245737	0.000236669	0.000227936	0.000219524	0.000211424
						4.26	2594.95	#REF!	13.9771	13.5	0	0	2.375	364.75	1.82375	92.59		9.41392	148.218	0.172368	-138.804		39.7849	128.647	0.466332	-88.8626		196.202	110.816	1.36771	85.386		4.26		0.000298619	0.000287599	0.000276986	0.00028516	0.000274637	0.000264503	0.000254742	0.000245341	0.000236288	0.000243337	0.000234357	0.000225709	0.00021738	0.000209358	0.000201632
						4.28	2607.24	#REF!	14.0427	14	0	0	1	365.75	1.82875	94.4188		9.42278	150.81	0.163505	-141.388		39.8091	131.019	0.442072	-91.2097		196.276	113.006	1.29379	83.2697		4.28		0.000284961	0.000274445	0.000264318	0.000272034	0.000261995	0.000252327	0.000243016	0.000234048	0.000225411	0.000232063	0.0002235	0.000215252	0.000207309	0.000199659	0.000192291
						4.3	2619.45	#REF!	14.1083	14	0	0	1	366.75	1.83375	96.2525		9.43123	153.428	0.155059	-143.997		39.8321	133.415	0.419038	-93.5824		196.346	115.221	1.22393	81.1248		4.3		0.000271923	0.000261889	0.000252225	0.000259508	0.000249932	0.000240709	0.000231826	0.000223271	0.000215032	0.000221309	0.000213143	0.000205277	0.000197702	0.000190407	0.00018338
						4.32	2631.57	#REF!	14.1739	14	0	0	1	367.75	1.83875	98.0913		9.43928	156.071	0.147009	-146.632		39.854	135.835	0.397167	-95.9807		196.412	117.46	1.15791	78.9515		4.32		0.00025948	0.000249905	0.000240683	0.000247558	0.000238422	0.000229624	0.00022115	0.00021299	0.00020513	0.000211053	0.000203265	0.000195764	0.00018854	0.000181583	0.000174882
						4.34	2643.61	#REF!	14.2395	14	0	0	1	368.75	1.84375	99.935		9.44695	158.739	0.139337	-149.292		39.8748	138.279	0.376399	-98.4046		196.474	119.724	1.0955	76.75		4.34		0.000247606	0.000238469	0.000229669	0.000236158	0.000227443	0.00021905	0.000210967	0.000203182	0.000195684	0.000201274	0.000193846	0.000186693	0.000179804	0.000173168	0.000166778
						4.36	2655.58	#REF!	14.3052	14	0	0	1	369.75	1.84875	101.784		9.45426	161.432	0.132025	-151.978		39.8945	140.749	0.356678	-100.854		196.533	122.013	1.03651	74.5204		4.36		0.000236277	0.000227558	0.00021916	0.000225286	0.000216972	0.000208965	0.000201254	0.000193828	0.000186675	0.000191949	0.000184866	0.000178044	0.000171474	0.000165146	0.000159052
						4.38	2667.46	#REF!	14.3708	14	0	0	1	370.75	1.85375	103.638		9.46123	164.15	0.125057	-154.689		39.9132	143.242	0.337949	-103.329		196.589	124.326	0.980742	72.2629		4.38		0.000225469	0.000217149	0.000209136	0.000214917	0.000206986	0.000199348	0.000191992	0.000184907	0.000178084	0.000183061	0.000176305	0.000169799	0.000163533	0.000157499	0.000151687
						4.4	2679.27	#REF!	14.4364	14	0	0	1	371.75	1.85875	105.496		9.46788	166.894	0.118415	-157.426		39.931	145.761	0.320162	-105.83		196.642	126.664	0.928013	69.9775		4.4		0.00021516	0.000207221	0.000199574	0.000205031	0.000197465	0.000190178	0.00018316	0.000176401	0.000169892	0.000174588	0.000168145	0.000161941	0.000155965	0.000150209	0.000144666
						4.42	2691	#REF!	14.502	14.5	0	0	0.875	372.625	1.86313	107.359		9.47421	169.662	0.112084	-160.188		39.9479	148.304	0.303268	-108.356		196.692	129.027	0.878153	67.6645		4.42		0.000205327	0.00019775	0.000190453	0.000195604	0.000188386	0.000181434	0.000174738	0.00016829	0.00016208	0.000166512	0.000160367	0.000154449	0.00014875	0.000143261	0.000137974
						4.44	2702.65	#REF!	14.5676	14.5	0	0	0.875	373.5	1.8675	109.227		9.48024	172.456	0.10605	-162.976		39.964	150.872	0.287221	-110.908		196.739	131.415	0.831	65.3239		4.44		0.000195948	0.000188718	0.000181754	0.000186615	0.000179729	0.000173097	0.000166709	0.000160557	0.000154632	0.000158814	0.000152954	0.000147309	0.000141873	0.000136638	0.000131596
						4.46	2714.23	#REF!	14.6333	14.5	0	0	0.875	374.375	1.87187	111.099		9.48599	175.276	0.100298	-165.79		39.9792	153.465	0.271978	-113.485		196.783	133.828	0.786402	62.9557		4.46		0.000187004	0.000180103	0.000173457	0.000178046	0.000171476	0.000165148	0.000159054	0.000153185	0.000147532	0.000151478	0.000145888	0.000140505	0.00013532	0.000130326	0.000125517
						4.48	2725.74	#REF!	14.6989	14.5	0	0	0.875	375.25	1.87625	112.975		9.49148	178.12	0.0948144	-168.629		39.9937	156.082	0.257496	-116.088		196.826	136.265	0.744214	60.5602		4.48		0.000178475	0.000171889	0.000165546	0.000169878	0.000163609	0.000157571	0.000151757	0.000146156	0.000140763	0.000144487	0.000139155	0.00013402	0.000129075	0.000124312	0.000119724
						4.5	2737.17	#REF!	14.7645	14.5	0	0	0.875	376.125	1.88062	114.856		9.4967	180.99	0.0895872	-171.494		40.0074	158.724	0.243737	-118.717		196.865	138.728	0.704303	58.1373		4.5		0.000170342	0.000164056	0.000158002	0.000162091	0.000156109	0.000150349	0.0001448	0.000139457	0.000134311	0.000137825	0.000132739	0.000127841	0.000123123	0.00011858	0.000114204
						4.52	2748.53	#REF!	14.8301	14.5	0	0	0.875	377	1.885	116.741		9.50169	183.886	0.0846037	-174.384		40.0205	161.392	0.230664	-121.371		196.903	141.216	0.666539	55.6871		4.52		0.000162587	0.000156587	0.000150809	0.000154669	0.000148961	0.000143464	0.00013817	0.000133071	0.000128161	0.000131477	0.000126626	0.000121953	0.000117453	0.000113118	0.000108944
						4.54	2759.82	#REF!	14.8957	14.5	0	0	0.875	377.875	1.88938	118.63		9.50644	186.807	0.0798522	-177.301		40.0329	164.084	0.218241	-124.051		196.939	143.729	0.630803	53.2098		4.54		0.000155193	0.000149466	0.00014395	0.000147594	0.000142148	0.000136902	0.00013185	0.000126985	0.000122299	0.000125429	0.0001208	0.000116343	0.000112049	0.000107915	0.000103932
						4.56	2771.03	#REF!	14.9614	14.5	0	0	0.875	378.75	1.89375	120.524		9.51097	189.754	0.0753217	-180.243		40.0447	166.801	0.206435	-126.757		196.973	146.267	0.59698	50.7054		4.56		0.000148143	0.000142677	0.000137412	0.000140852	0.000135654	0.000130648	0.000125827	0.000121184	0.000116712	0.000119666	0.00011525	0.000110997	0.000106901	0.000102956	9.91569e-05
						4.58	2782.18	#REF!	15.027	15	0	0	1.625	380.375	1.90187	122.426		9.51529	192.726	0.0710015	-183.21		40.056	169.544	0.195213	-129.488		197.005	148.831	0.564964	48.1739		4.58		0.000141427	0.000136208	0.000131182	0.000134429	0.000129469	0.000124691	0.00012009	0.000115658	0.00011139	0.000114179	0.000109965	0.000105907	0.000101999	9.8235e-05	9.461e-05
						4.6	2793.26	#REF!	15.0926	15	0	0	1.625	382	1.91	124.336		9.51941	195.723	0.0668813	-186.204		40.0666	172.311	0.184545	-132.244		197.035	146.107	0.534653	50.9283		4.6		0.000135027	0.000130045	0.000125246	0.000128312	0.000123577	0.000119017	0.000114625	0.000110395	0.000106321	0.000108953	0.000104933	0.00010106	9.73311e-05	9.37394e-05	9.02803e-05
						4.62	2804.27	#REF!	15.1582	15	0	0	1.625	383.625	1.91813	126.254		9.52334	198.747	0.0629515	-189.224		40.0768	175.104	0.174403	-135.027		197.064	148.629	0.50595	48.4345		4.62		0.00012893	0.000124172	0.00011959	0.000122485	0.000117965	0.000113612	0.000109419	0.000105382	0.000101493	0.000103977	0.00010014	9.64451e-05	9.28861e-05	8.94584e-05	8.61572e-05
						4.64	2815.21	#REF!	15.2238	15	0	0	1.625	385.25	1.92625	128.18		9.52709	201.796	0.0592029	-192.269		40.0864	177.921	0.16476	-137.835		197.091	151.176	0.478765	45.9146		4.64		0.000123119	0.000118576	0.0001142	0.000116934	0.000112619	0.000108463	0.00010446	0.000100606	9.68931e-05	9.92388e-05	9.55767e-05	9.20497e-05	8.86529e-05	8.53815e-05	8.22307e-05
						4.66	2826.08	#REF!	15.2895	15	0	0	1.625	386.875	1.93437	130.114		9.53066	204.871	0.0556268	-195.34		40.0956	180.765	0.155589	-140.669		197.117	153.748	0.453015	43.3688		4.66		0.000117582	0.000113243	0.000109064	0.000111646	0.000107526	0.000103558	9.97363e-05	9.60558e-05	9.25112e-05	9.47258e-05	9.12303e-05	8.78637e-05	8.46214e-05	8.14987e-05	7.84912e-05
						4.68	2836.89	#REF!	15.3551	15	0	0	1.625	388.5	1.9425	132.057		9.53408	207.972	0.0522148	-198.438		40.1043	183.633	0.146866	-143.529		197.141	156.344	0.428618	40.7969		4.68		0.000112305	0.00010816	0.000104169	0.000106607	0.000102673	9.88845e-05	9.52355e-05	9.17211e-05	8.83364e-05	9.04275e-05	8.70906e-05	8.38768e-05	8.07815e-05	7.78005e-05	7.49296e-05
						4.7	2847.63	#REF!	15.4207	15	0	0	1.625	390.125	1.95063	134.007		9.53733	211.098	0.0489591	-201.561		40.1126	186.527	0.138568	-146.414		197.164	158.965	0.4055	38.1991		4.7		0.000107275	0.000103317	9.95041e-05	0.000101807	9.80501e-05	9.44319e-05	9.09472e-05	8.75911e-05	8.43588e-05	8.63333e-05	8.31475e-05	8.00792e-05	7.71241e-05	7.42781e-05	7.15371e-05
						4.72	2858.31	#REF!	15.4863	15	0	0	1.625	391.75	1.95875	135.966		9.54044	214.251	0.0458521	-204.71		40.1205	189.446	0.130674	-149.325		197.186	161.611	0.383589	35.5753		4.72		0.000102482	9.87e-05	9.50578e-05	9.7233e-05	9.36449e-05	9.01892e-05	8.68611e-05	8.36557e-05	8.05687e-05	8.24333e-05	7.93914e-05	7.64617e-05	7.36401e-05	7.09227e-05	6.83055e-05
						4.74	2868.93	#REF!	15.5519	15.5	0	0	0.857143	392.607	1.96304	137.929		9.5434	217.429	0.0428868	-207.886		40.128	192.39	0.123162	-152.262		197.207	164.281	0.362821	32.9256		4.74		9.79098e-05	9.42968e-05	9.0817e-05	9.28717e-05	8.94446e-05	8.61439e-05	8.2965e-05	7.99035e-05	7.69549e-05	7.87159e-05	7.58111e-05	7.30135e-05	7.03192e-05	6.77243e-05	6.52251e-05
						4.76	2879.48	#REF!	15.6176	15.5	0	0	0.857143	393.464	1.96732	139.897		9.54623	220.634	0.0400565	-211.087		40.1352	195.36	0.116014	-155.225		197.227	166.977	0.343131	30.25		4.76		9.35492e-05	9.0097e-05	8.67723e-05	8.87133e-05	8.54396e-05	8.22867e-05	7.92502e-05	7.63257e-05	7.35091e-05	7.51722e-05	7.23982e-05	6.97266e-05	6.71536e-05	6.46755e-05	6.22888e-05
						4.78	2889.97	#REF!	15.6832	15.5	0	0	0.857143	394.321	1.97161	141.868		9.54894	223.864	0.0373548	-214.315		40.142	198.356	0.109211	-158.214		197.245	169.697	0.324462	27.5485		4.78		8.939e-05	8.60913e-05	8.29144e-05	8.4748e-05	8.16206e-05	7.86087e-05	7.57079e-05	7.29141e-05	7.02234e-05	7.17942e-05	6.91449e-05	6.65933e-05	6.41359e-05	6.17692e-05	5.94898e-05
						4.8	2900.39	#REF!	15.7488	15.5	0	0	0.857143	395.179	1.97589	143.844		9.55151	227.12	0.0347756	-217.569		40.1484	201.377	0.102736	-161.228		197.263	172.442	0.306757	24.821		4.8		8.54228e-05	8.22705e-05	7.92346e-05	8.09669e-05	7.7979e-05	7.51015e-05	7.23301e-05	6.9661e-05	6.70903e-05	6.8574e-05	6.60435e-05	6.36064e-05	6.12592e-05	5.89986e-05	5.68214e-05
						4.82	2910.76	#REF!	15.8144	15.5	0	0	0.857143	396.036	1.98018	145.824		9.55398	230.403	0.0323131	-220.849		40.1546	204.423	0.0965718	-164.269		197.28	175.212	0.289965	22.0677		4.82		8.16386e-05	7.8626e-05	7.57245e-05	7.73612e-05	7.45064e-05	7.1757e-05	6.9109e-05	6.65587e-05	6.41026e-05	6.55041e-05	6.30868e-05	6.07588e-05	5.85167e-05	5.63573e-05	5.42776e-05
						4.84	2921.07	#REF!	15.88	15.5	0	0	0.857143	396.893	1.98446	147.809		9.55633	233.712	0.0299619	-224.155		40.1605	207.496	0.0907032	-167.335		197.296	178.007	0.274036	19.2885		4.84		7.80288e-05	7.51494e-05	7.23762e-05	7.39226e-05	7.11947e-05	6.85675e-05	6.60372e-05	6.36003e-05	6.12534e-05	6.25772e-05	6.0268e-05	5.8044e-05	5.59021e-05	5.38392e-05	5.18524e-05
						4.86	2931.31	#REF!	15.9457	15.5	0	0	0.857143	397.75	1.98875	149.798		9.55857	237.047	0.0277167	-227.488		40.1661	210.594	0.0851152	-170.428		197.311	180.827	0.258922	16.4834		4.86		7.45852e-05	7.18329e-05	6.91821e-05	7.06433e-05	6.80364e-05	6.55257e-05	6.31077e-05	6.07789e-05	5.85361e-05	5.97867e-05	5.75805e-05	5.54557e-05	5.34092e-05	5.14383e-05	4.95402e-05
						4.88	2941.5	#REF!	16.0113	16	0	0	1.125	398.875	1.99437	151.792		9.56072	240.408	0.0255724	-230.847		40.1714	213.718	0.0797937	-173.546		197.325	183.673	0.244581	13.6524		4.88		7.13007e-05	6.86696e-05	6.61356e-05	6.75163e-05	6.50248e-05	6.26253e-05	6.03143e-05	5.80886e-05	5.5945e-05	5.71266e-05	5.50185e-05	5.29882e-05	5.10328e-05	4.91496e-05	4.73359e-05
						4.9	2951.63	#REF!	16.0769	16	0	0	1.125	400	2	153.792		9.56277	243.795	0.0235243	-234.232		40.1765	216.867	0.0747254	-176.691		197.339	186.543	0.23097	10.7955		4.9		6.81677e-05	6.56522e-05	6.32295e-05	6.45343e-05	6.21528e-05	5.98593e-05	5.76504e-05	5.5523e-05	5.3474e-05	5.45904e-05	5.25759e-05	5.06358e-05	4.87672e-05	4.69676e-05	4.52344e-05
						4.92	2961.7	#REF!	16.1425	16	0	0	1.125	401.125	2.00562	155.798		9.56472	247.209	0.0215679	-237.644		40.1813	220.043	0.0698975	-179.861		197.352	189.439	0.218049	7.91261		4.92		6.51789e-05	6.27737e-05	6.04573e-05	6.16904e-05	5.94139e-05	5.72214e-05	5.51098e-05	5.30761e-05	5.11175e-05	5.21724e-05	5.02471e-05	4.83929e-05	4.66071e-05	4.48872e-05	4.32308e-05
						4.94	2971.71	#REF!	16.2081	16	0	0	1.125	402.25	2.01125	157.809		9.56659	250.649	0.0196988	-241.082		40.1859	223.244	0.065298	-183.058		197.364	192.36	0.205783	5.00384		4.94		6.23276e-05	6.00276e-05	5.78125e-05	5.89779e-05	5.68015e-05	5.47054e-05	5.26867e-05	5.07425e-05	4.887e-05	4.98667e-05	4.80266e-05	4.62543e-05	4.45474e-05	4.29035e-05	4.13203e-05
						4.96	2981.67	#REF!	16.2738	16	0	0	1.125	403.375	2.01687	159.826		9.56838	254.115	0.0179131	-244.547		40.1903	226.471	0.0609155	-186.281		197.376	195.306	0.194135	2.06912		4.96		5.96072e-05	5.74076e-05	5.52891e-05	5.63907e-05	5.43098e-05	5.23056e-05	5.03755e-05	4.85165e-05	4.67262e-05	4.76681e-05	4.59091e-05	4.42149e-05	4.25833e-05	4.10119e-05	3.94985e-05
						4.98	2991.58	#REF!	16.3394	16	0	0	1.125	404.5	2.0225	161.848		9.57008	257.608	0.0162066	-248.038		40.1944	229.724	0.0567392	-189.53		197.387	198.278	0.183073	-0.891558		4.98		5.70115e-05	5.49077e-05	5.28815e-05	5.39227e-05	5.19329e-05	5.00164e-05	4.81707e-05	4.63931e-05	4.46811e-05	4.55714e-05	4.38897e-05	4.22701e-05	4.07102e-05	3.92079e-05	3.77611e-05
						5	3001.42	#REF!	16.405	16	0	0	1.125	405.625	2.02812	163.876		9.57171	261.127	0.0145759	-251.556		40.1984	233.003	0.0527588	-192.805		197.397	201.275	0.172566	-3.87821		5		5.45345e-05	5.25221e-05	5.05839e-05	5.15682e-05	4.96653e-05	4.78325e-05	4.60674e-05	4.43674e-05	4.27302e-05	4.35716e-05	4.19637e-05	4.04152e-05	3.89238e-05	3.74874e-05	3.6104e-05
						5.02	3011.22	#REF!	16.4706	16	0	0	1.125	406.75	2.03375	165.91		9.57327	264.673	0.0130172	-255.1		40.2022	236.309	0.0489647	-196.107		197.407	204.298	0.162584	-6.89085		5.02		5.21707e-05	5.02455e-05	4.83914e-05	4.93219e-05	4.75018e-05	4.57489e-05	4.40607e-05	4.24348e-05	4.08689e-05	4.16641e-05	4.01266e-05	3.86459e-05	3.72198e-05	3.58463e-05	3.45235e-05
						5.04	3020.95	#REF!	16.5362	16.5	0	0	1.125	407.875	2.03937	167.949		9.57476	268.246	0.0115273	-258.671		40.2058	239.64	0.0453477	-199.434		197.417	207.346	0.153099	-9.92951		5.04		4.99147e-05	4.80728e-05	4.62988e-05	4.71785e-05	4.54376e-05	4.37608e-05	4.2146e-05	4.05907e-05	3.90928e-05	3.98445e-05	3.83742e-05	3.69581e-05	3.55943e-05	3.42808e-05	3.30158e-05
						5.06	3030.64	#REF!	16.6019	16.5	0	0	1.125	409	2.045	169.994		9.57619	271.845	0.010103	-262.268		40.2093	242.998	0.0418989	-202.788		197.426	210.42	0.144085	-12.9942		5.06		4.77614e-05	4.59989e-05	4.43015e-05	4.51332e-05	4.34677e-05	4.18637e-05	4.03188e-05	3.8831e-05	3.73981e-05	3.81087e-05	3.67024e-05	3.5348e-05	3.40436e-05	3.27873e-05	3.15774e-05
						5.08	3040.27	#REF!	16.6675	16.5	0	0	1.125	410.125	2.05062	172.045		9.57755	275.47	0.00874122	-265.893		40.2126	246.381	0.0386102	-206.169		197.434	213.519	0.135517	-16.0849		5.08		4.57059e-05	4.40193e-05	4.23949e-05	4.31813e-05	4.15879e-05	4.00532e-05	3.85752e-05	3.71517e-05	3.57807e-05	3.64525e-05	3.51073e-05	3.38118e-05	3.25641e-05	3.13624e-05	3.02051e-05
						5.1	3049.85	#REF!	16.7331	16.5	0	0	1.125	411.25	2.05625	174.101		9.57885	279.123	0.00743904	-269.544		40.2157	249.791	0.0354736	-209.576		197.442	216.644	0.127373	-19.2018		5.1		4.37436e-05	4.21294e-05	4.05747e-05	4.13184e-05	3.97937e-05	3.83252e-05	3.6911e-05	3.55489e-05	3.4237e-05	3.48722e-05	3.35853e-05	3.2346e-05	3.11523e-05	3.00028e-05	2.88956e-05
						5.12	3059.38	#REF!	16.7987	16.5	0	0	1.125	412.375	2.06187	176.163		9.5801	282.802	0.00619372	-273.222		40.2187	253.228	0.0324817	-213.009		197.45	219.795	0.119628	-22.3447		5.12		4.18701e-05	4.03251e-05	3.8837e-05	3.95402e-05	3.80811e-05	3.66759e-05	3.53225e-05	3.4019e-05	3.27636e-05	3.33641e-05	3.21329e-05	3.09472e-05	2.98052e-05	2.87053e-05	2.7646e-05
						5.14	3068.86	#REF!	16.8643	16.5	0	0	1.125	413.5	2.0675	178.231		9.58129	286.508	0.00500265	-276.926		40.2216	256.69	0.0296275	-216.469		197.457	222.971	0.112264	-25.5138		5.14		4.00813e-05	3.86022e-05	3.71777e-05	3.78428e-05	3.64463e-05	3.51014e-05	3.38061e-05	3.25586e-05	3.13571e-05	3.19249e-05	3.07468e-05	2.96122e-05	2.85195e-05	2.7467e-05	2.64535e-05
						5.16	3078.29	#REF!	16.93	16.5	0	0	1.125	414.625	2.07312	180.304		9.58243	290.24	0.00386334	-280.658		40.2243	260.179	0.0269042	-219.955		197.464	226.173	0.105259	-28.709		5.16		3.83731e-05	3.6957e-05	3.55933e-05	3.62223e-05	3.48856e-05	3.35983e-05	3.23584e-05	3.11643e-05	3.00143e-05	3.05512e-05	2.94238e-05	2.8338e-05	2.72923e-05	2.62852e-05	2.53152e-05
						5.18	3087.67	#REF!	16.9956	16.5	0	0	1.125	415.75	2.07875	182.383		9.58341	294	0.0028796	-284.416		40.2269	263.694	0.0243054	-223.468		197.471	229.402	0.0985954	-31.9304		5.18		0	0	0	3.4675e-05	3.33954e-05	3.21631e-05	3.09762e-05	2.98331e-05	2.87322e-05	2.924e-05	2.8161e-05	2.71218e-05	2.61209e-05	2.5157e-05	2.42287e-05
						5.2	3097	#REF!	17.0612	17	0	0	1.57143	417.321	2.08661	184.469		9.58417	297.786	0.00212014	-288.202		40.2294	267.236	0.0218252	-227.007		197.477	232.655	0.0922554	-35.178		5.2		0	0	0	0	0	0	0	0	0	2.79885e-05	2.69557e-05	2.5961e-05	2.5003e-05	2.40803e-05	2.31917e-05
						5.22	3106.28	#REF!	17.1268	17	0	0	1.57143	418.893	2.09446	186.564		9.58475	301.6	0.00154025	-292.015		40.2317	270.805	0.0194576	-230.573		197.484	235.935	0.0862222	-38.4518		5.22		0	0	0	0	0	0	0	0	0	0	0	0	0	0	0
						5.24	3115.51	#REF!	17.1924	17	0	0	1.57143	420.464	2.10232	188.666		9.58519	305.44	0.00110386	-295.855		40.234	274.399	0.0171974	-234.165		197.489	239.241	0.0804799	-41.752		5.24		0	0	0	0	0	0	0	0	0	0	0	0	0	0	0
						5.26	3124.69	#REF!	17.2581	17	0	0	1.57143	422.036	2.11018	190.776		9.58554	309.307	0.000752444	-299.722		40.2361	278.021	0.0150393	-237.785		197.495	242.573	0.0750134	-45.0784		5.26		0	0	0	0	0	0	0	0	0	0	0	0	0	0	0
						5.28	3133.83	#REF!	17.3237	17	0	0	1.57143	423.607	2.11804	192.894		9.5858	313.202	0.000486782	-303.616		40.2382	281.669	0.0129783	-241.431		197.5	245.931	0.0698088	-48.4312		5.28		0	0	0	0	0	0	0	0	0	0	0	0	0	0	0
						5.3	3142.92	#REF!	17.3893	17	0	0	1.57143	425.179	2.12589	195.02		9.586	317.123	0.00029171	-307.537		40.2402	285.344	0.0110098	-245.103		197.505	249.315	0.0648524	-51.8103		5.3		0	0	0	0	0	0	0	0	0	0	0	0	0	0	0
						5.32	3151.96	#REF!	17.4549	17	0	0	1.57143	426.75	2.13375	197.154		9.58614	321.072	0.000154579	-311.486		40.2421	289.045	0.00912945	-248.803		197.51	252.725	0.0601318	-55.2158		5.32		0	0	0	0	0	0	0	0	0	0	0	0	0	0	0
						5.34	3160.96	#REF!	17.5205	17.5	0	0	1.75	428.5	2.1425	199.296		9.58623	325.048	5.71593e-05	-315.461		40.2439	292.773	0.00733293	-252.529		197.514	256.162	0.0556349	-58.6478		5.34		0	0	0	0	0	0	0	0	0	0	0	0	0	0	0
						5.36	3169.91	#REF!	17.5862	17.5	0	0	1.75	430.25	2.15125	201.448		9.58629	329.051	0	-319.464		40.2456	296.528	0.00561629	-256.283		197.518	259.625	0.0513504	-62.1062		5.36		0	0	0	0	0	0	0	0	0	0	0	0	0	0	0
						5.38	3178.82	#REF!	17.6518	17.5	0	0	1.75	432	2.16	203.608		9.58629	333.081	0	-323.495		40.247	300.31	0.00417502	-260.063		197.522	263.114	0.0472675	-65.5911		5.38		0	0	0	0	0	0	0	0	0	0	0	0	0	0	0
						5.4	3187.69	#REF!	17.7174	17.5	0	0	1.75	433.75	2.16875	205.776		9.58629	337.139	0	-327.552		40.2482	304.119	0.0029709	-263.87		197.526	266.629	0.043376	-69.1026		5.4		0	0	0	0	0	0	0	0	0	0	0	0	0	0	0
						5.42	3196.51	#REF!	17.783	17.5	0	0	1.75	435.5	2.1775	207.954		9.58629	341.223	0	-331.637		40.2492	307.954	0.00200258	-267.705		197.53	270.171	0.0396664	-72.6406		5.42		0	0	0	0	0	0	0	0	0	0	0	0	0	0	0
						5.44	3205.28	#REF!	17.8486	17.5	0	0	1.75	437.25	2.18625	210.14		9.58629	345.336	0	-335.75		40.25	311.817	0.00117609	-271.567		197.534	273.739	0.0361296	-76.2052		5.44		0	0	0	0	0	0	0	0	0	0	0	0	0	0	0
						5.46	3214.01	#REF!	17.9143	17.5	0	0	1.75	439	2.195	212.335		9.58629	349.476	0	-339.889		40.2507	315.706	0.000525968	-275.456		197.537	277.333	0.0327569	-79.7965		5.46		0	0	0	0	0	0	0	0	0	0	0	0	0	0	0
						5.48	3222.7	#REF!	17.9799	17.5	0	0	1.75	440.75	2.20375	214.539		9.58629	353.643	0	-344.056		40.2512	319.623	0	-279.372		197.54	280.955	0.0295402	-83.4144		5.48		0	0	0	0	0	0	0	0	0	0	0	0	0	0	0
						5.5	3231.35	#REF!	18.0455	18	0	0	0	440.75	2.20375	216.742												197.543	284.602	0.0262904	-87.0589		5.5		0	0	0	0	0	0	0	0	0	0	0	0	0	0	0
						5.52	3239.96	#REF!	18.1111	18	0	0	0	440.75	2.20375	218.946												197.547	288.277	0.0231908	-90.7301		5.52
						5.54	3248.53	#REF!	18.1767	18	0	0	0	440.75	2.20375	221.15												197.55	291.978	0.0202342	-94.4281		5.54
						5.56	3257.05	#REF!	18.2424	18	0	0	0	440.75	2.20375	223.354												197.552	295.705	0.0174134	-98.153		5.56
						5.58	3265.53	#REF!	18.308	18	0	0	0	440.75	2.20375	225.557												197.555	299.46	0.014722	-101.905		5.58
						5.6	3273.98	#REF!	18.3736	18	0	0	0	440.75	2.20375	227.761												197.558	303.241	0.0121537	-105.683		5.6
						5.62	3282.38	#REF!	18.4392	18	0	0	0	440.75	2.20375	229.965												197.56	307.049	0.00970254	-109.489		5.62
						5.64	3290.75	#REF!	18.5048	18.5	0	0	0	440.75	2.20375	232.169												197.562	310.884	0.00751422	-113.322		5.64
						5.66	3299.07	#REF!	18.5705	18.5	0	0	0	440.75	2.20375	234.372												197.564	314.746	0.00569855	-117.182		5.66
						5.68	3307.36	#REF!	18.6361	18.5	0	0	0	440.75	2.20375	236.576												197.566	318.634	0.00420271	-121.069		5.68
						5.7	3315.61	#REF!	18.7017	18.5	0	0	0	440.75	2.20375	238.78												197.567	322.55	0.00298095	-124.983		5.7
						5.72	3323.82	#REF!	18.7673	18.5	0	0	0	440.75	2.20375	240.984												197.568	326.493	0.00199369	-128.925		5.72
						5.74	3332	#REF!	18.8329	18.5	0	0	0	440.75	2.20375	243.187												197.569	330.463	0.00117004	-132.894		5.74
						5.76	3340.14	#REF!	18.8986	18.5	0	0	0	440.75	2.20375	245.391												197.569	334.46	0.000523887	-136.89		5.76
						5.78	3348.24	#REF!	18.9642	18.5	0	0	0	440.75	2.20375	247.595												197.57	338.484	0	-140.914		5.78
[truncated: 136 more columns]

## Sheet: Middletown_1
																																				11.2289	11.2852	11.3417	11.3986	11.4557	13.1637	13.2296	13.296	13.3626	13.4296	15.3954	15.4726	15.5501	15.6281
	INPUTS			ERROR CHECK		Surge Height	Wall Length (m)	sum of middleH * dL	Surge height (ft)	Rounding (ft)	delta Area (sq m)	Building numbers	Building Values (million $)	Cum Value	Marginal Damage	Damage	2030	Expected Benefit (million $, PV)	Total Cost (million $, PV)	Residual Dam (million $, PV)	Net Benefit (million $, PV)	2080	Expected Benefit (million $, PV)	Total Cost (million $, PV)	Residual Dam (million $, PV)	Net Benefit (million $, PV)	2130	Expected Benefit (million $, PV)	Total Cost (million $, PV)	Residual Dam (million $, PV)	Net Benefit (million $, PV)		Surge Height			0	1	2	3	4	5	6	7	8	9	10	11	12	13
	SPATIAL DATA					1.2	706.947	#REF!	3.9372	3.5	10004.3	0	0	0	0	0		0	0.713315	193.782	-0.713315		0	0.168284	387.124	-0.168284		0	0.0126812	511.068	-0.0126812		1.2		2030	0	1	2	3	4	5	6	7	8	9	10	11	12	13
	Target City	Middletown				1.22	775.285	#REF!	4.00282	4	2315.25	3.11514	0.544205	0.544205	0.00272103	0.00272103		0	0.858544	193.782	-0.858544		0	0.222512	387.124	-0.222512		0	0.00574728	511.068	-0.00574728		1.22			0	0	0	0	0	0	0	0	0	0	0	0	0	0
	Policy Year (base year: 2020)	#REF!				1.24	869.994	#REF!	4.06844	4	2315.25	3.11514	0.544205	1.08841	0.00544205	0.00816308		0	1.053	193.782	-1.053		0	0.296273	387.124	-0.296273		0	0.00127395	511.068	-0.00127395		1.24			0	0	0	0	0	0	0	0	0	0	0	0	0	0
	SLR rate (before policy)	4.17	mm/year			1.26	1029.74	#REF!	4.13406	4	2315.25	3.11514	0.544205	1.63262	0.00816308	0.0163262		0	1.35708	193.782	-1.35708		0	0.410518	387.124	-0.410518		0	9.42419e-05	511.068	-9.42419e-05		1.26			0	0	0	0	0	0	0	0	0	0	0	0	0	0
	SLR rate (after policy)	#REF!	mm/year			1.28	1257.11	#REF!	4.19968	4	2315.25	3.11514	0.544205	2.17682	0.0108841	0.0272103		0	1.79767	193.782	-1.79767		0	0.579972	387.124	-0.579972		0	0.00414183	511.068	-0.00414183		1.28			0	0	0	0	0	0	0	0	0	0	0	0	0	0
	MHHW	0.74	meter			1.3	1392.21	#REF!	4.2653	4	2315.25	3.11514	0.544205	2.72103	0.0136051	0.0408154		0	2.15331	193.782	-2.15331		0	0.735949	387.124	-0.735949		0	0.0154172	511.068	-0.0154172		1.3			0	0	0	0	0	0	0	0	0	0	0	0	0	0
						1.32	1477.63	#REF!	4.33092	4	2315.25	3.11514	0.544205	3.26523	0.0163262	0.0571416		1.08205	2.46462	192.7	-1.38257		0	0.887262	387.124	-0.887262		0	0.0346196	511.068	-0.0346196		1.32			0	0	0	0	0	0	0	0	0	0	0	0	0	0
						1.34	1541.39	#REF!	4.39654	4	2315.25	3.11514	0.544205	3.80944	0.0190472	0.0761887		3.48198	2.76494	190.3	0.717038		0	1.04334	387.124	-1.04334		0	0.0622112	511.068	-0.0622112		1.34			0.232981	0.224384	0.216104	0.208129	0.200449	0	0	0	0	0	0	0	0	0
	GEV ESTIMATION					1.36	1593.1	#REF!	4.46216	4	2315.25	3.11514	0.544205	4.35364	0.0217682	0.097957		4.35364	3.06545	189.428	1.28819		0	1.20737	387.124	-1.20737		0	0.0985609	511.068	-0.0985609		1.36			0.25934	0.24977	0.240553	0.231676	0.223127	0.257402	0.247904	0.238756	0.229945	0.22146	0	0	0	0
	μ (location)	1.572				1.38	1637.04	#REF!	4.52778	4.5	6750.9	9.08326	1.58682	5.94046	0.0297023	0.127659		5.94046	3.371	187.841	2.56946		0	1.38076	387.124	-1.38076		0	0.143979	511.068	-0.143979		1.38			0.278409	0.268135	0.258241	0.248711	0.239533	0.276291	0.266095	0.256276	0.246819	0.237711	0.274227	0.264107	0.254361	0.244975
	σ (scale)	0.1831				1.4	1675.54	#REF!	4.5934	4.5	6750.9	9.08326	1.58682	7.52727	0.0376364	0.165296		7.52727	3.68413	186.254	3.84315		0	1.56428	387.124	-1.56428		0	0.198736	511.068	-0.198736		1.4			0.302999	0.291818	0.28105	0.270678	0.26069	0.300645	0.28955	0.278865	0.268575	0.258664	0.298357	0.287347	0.276744	0.266531
	k (shape)	-0.1136				1.42	1709.98	#REF!	4.65902	4.5	6750.9	9.08326	1.58682	9.11409	0.0455705	0.210866		9.11409	4.00633	184.667	5.10776		0	1.75841	387.124	-1.75841		0	0.263072	511.068	-0.263072		1.42			0.327701	0.315608	0.303962	0.292745	0.281942	0.32509	0.313094	0.30154	0.290412	0.279696	0.322563	0.31066	0.299196	0.288155
						1.44	1741.26	#REF!	4.72464	4.5	6750.9	9.08326	1.58682	10.7009	0.0535045	0.264371		10.7009	4.33859	183.081	6.36232		0	1.96348	387.124	-1.96348		0	0.337206	511.068	-0.337206		1.44			0.349262	0.336374	0.323961	0.312006	0.300493	0.346398	0.333615	0.321304	0.309448	0.298028	0.343638	0.330957	0.318744	0.306982
	Coefficients of the cost function					1.46	1770.01	#REF!	4.79026	4.5	6750.9	9.08326	1.58682	12.2877	0.0614386	0.325809		12.2877	4.68155	181.494	7.60618		0	2.17975	387.124	-2.17975		0	0.421339	511.068	-0.421339		1.46			0.36594	0.352436	0.33943	0.326905	0.314841	0.362837	0.349447	0.336552	0.324133	0.312171	0.359861	0.346581	0.333792	0.321474
	coef1	0.48				1.48	1796.67	#REF!	4.85588	4.5	6750.9	9.08326	1.58682	13.8745	0.0693727	0.395182		13.8745	5.0357	179.907	8.83884		0	2.40744	387.124	-2.40744		0	0.515656	511.068	-0.515656		1.48			0.377014	0.363101	0.349702	0.336797	0.324369	0.373691	0.359901	0.34662	0.333829	0.32151	0.370522	0.356849	0.343681	0.330998
	coef2	0.00195521				1.5	1821.58	#REF!	4.9215	4.5	6750.9	9.08326	1.58682	15.4614	0.0773068	0.472489		15.4614	5.40143	178.32	10.0599		0	2.6467	387.124	-2.6467		0	0.620331	511.068	-0.620331		1.5			0.382439	0.368326	0.354734	0.341644	0.329037	0.378916	0.364934	0.351467	0.338497	0.326006	0.375577	0.361717	0.348369	0.335514
	coef3	-1.67966e-06		Buildings exist under MHHW		1.52	1844.99	#REF!	4.98712	4.5	6750.9	9.08326	1.58682	17.0482	0.0852409	0.55773		17.0482	5.77901	176.733	11.2692		0	2.8977	387.124	-2.8977		0	0.735526	511.068	-0.735526		1.52			0.382592	0.368474	0.354877	0.341781	0.329169	0.378887	0.364905	0.351439	0.338471	0.32598	0.375397	0.361544	0.348202	0.335353
	coef4	5.016e-10				1.54	1867.11	#REF!	5.05274	5	4815.91	6.47976	1.13199	18.1802	0.0909008	0.64863		18.1802	6.1687	175.601	12.0115		0	3.16056	387.124	-3.16056		0	0.861396	511.068	-0.861396		1.54			0.378091	0.364138	0.350701	0.337759	0.325295	0.374215	0.360406	0.347106	0.334297	0.321961	0.37059	0.356915	0.343744	0.331059
	q	160215				1.56	1888.1	#REF!	5.11836	5	4815.91	6.47976	1.13199	19.3122	0.0965608	0.745191		19.3122	6.57069	174.469	12.7415		14.7625	3.43542	372.362	11.3271		0	0.998088	511.068	-0.998088		1.56			0.368376	0.354783	0.34169	0.329081	0.316938	0.364353	0.350907	0.337958	0.325487	0.313476	0.360618	0.347311	0.334494	0.322151
	Growth Rate	0.005	%/year			1.58	1908.09	#REF!	5.18398	5	4815.91	6.47976	1.13199	20.4441	0.102221	0.847412		20.4441	6.98515	173.337	13.459		20.4441	3.72239	366.68	16.7218		0	1.14574	511.068	-1.14574		1.58			0.354842	0.341748	0.329136	0.316991	0.305293	0.350683	0.337742	0.325279	0.313275	0.301715	0.346853	0.334053	0.321726	0.309854
	discount rate	0.0426	%/year			1.6	1927.2	#REF!	5.2496	5	4815.91	6.47976	1.13199	21.5761	0.107881	0.955293		21.5761	7.41225	172.205	14.1639		21.5761	4.02157	365.548	17.5546		0	1.30449	511.068	-1.30449		1.6			0.33865	0.326153	0.314117	0.302526	0.291362	0.33436	0.322022	0.310138	0.298694	0.287671	0.330441	0.318247	0.306503	0.295193
	useful_life	30	years			1.62	1945.5	#REF!	5.31522	5	4815.91	6.47976	1.13199	22.7081	0.113541	1.06883		22.7081	7.85211	171.073	14.856		22.7081	4.33308	364.416	18.3751		0	1.47445	511.068	-1.47445		1.62			0.320755	0.308919	0.297519	0.28654	0.275966	0.316333	0.30466	0.293417	0.28259	0.272162	0.312327	0.300801	0.289701	0.27901
	CapEx	0.005				1.64	1963.09	#REF!	5.38084	5	4815.91	6.47976	1.13199	23.8401	0.119201	1.18803		23.8401	8.30486	169.941	15.5353		23.8401	4.65701	363.284	19.1831		0	1.65576	511.068	-1.65576		1.64			0.301933	0.290791	0.280061	0.269726	0.259772	0.297372	0.286398	0.27583	0.265651	0.255848	0.293272	0.28245	0.272027	0.261989
	Difference	0.02	meter			1.66	1980.02	#REF!	5.44646	5	4815.91	6.47976	1.13199	24.9721	0.124861	1.31289		24.9721	8.77062	168.809	16.2015		24.9721	4.99345	362.152	19.9787		0	1.84853	511.068	-1.84853		1.66			0.2828	0.272364	0.262313	0.252633	0.243311	0.278088	0.267826	0.257943	0.248424	0.239257	0.273887	0.26378	0.254046	0.244671
	Minimum height where buildings locate	4	ft			1.68	1996.35	#REF!	5.51208	5.5	15244.6	20.5115	3.58329	28.5554	0.142777	1.45567		28.5554	9.24948	165.226	19.3059		28.5554	5.3425	358.569	23.2129		0	2.05288	511.068	-2.05288		1.68			0.263837	0.254101	0.244724	0.235693	0.226996	0.25896	0.249404	0.240201	0.231337	0.2228	0.254645	0.245249	0.236198	0.227482
	A factor to account for other damages than buildings	2				1.7	2012.13	#REF!	5.5777	5.5	15244.6	20.5115	3.58329	32.1387	0.160694	1.61637		32.1387	9.74156	161.643	22.3971		32.1387	5.70424	354.986	26.4345		0	2.26892	511.068	-2.26892		1.7			0.247496	0.238363	0.229567	0.221096	0.212937	0.242394	0.233449	0.224835	0.216538	0.208547	0.237914	0.229134	0.220679	0.212535
	Ratio of houses w/ basements	0.3	(1=All have basements; 0=No basements)			1.72	2027.41	#REF!	5.64332	5.5	15244.6	20.5115	3.58329	35.722	0.17861	1.79497		35.722	10.2469	158.06	25.4751		35.722	6.07876	351.402	29.6432		0	2.49674	511.068	-2.49674		1.72			0.2331	0.224498	0.216214	0.208235	0.200551	0.227718	0.219315	0.211222	0.203427	0.19592	0.223024	0.214794	0.206867	0.199234
	Average height of the first floor	0.9	meter			1.74	2042.22	#REF!	5.70894	5.5	15244.6	20.5115	3.58329	39.3053	0.196526	1.9915		39.3053	10.7657	154.476	28.5396		39.3053	6.46615	347.819	32.8391		0	2.73647	511.068	-2.73647		1.74			0.220209	0.212082	0.204256	0.196719	0.189459	0.214494	0.206578	0.198955	0.191613	0.184542	0.209541	0.201808	0.194361	0.187189
	Coastal length 12ft	2767.85				1.76	2056.6	#REF!	5.77456	5.5	15244.6	20.5115	3.58329	42.8886	0.214443	2.20594		42.8886	11.2979	150.893	31.5906		42.8886	6.86647	344.236	36.0221		0	2.98819	511.068	-2.98819		1.76			0.208544	0.200848	0.193437	0.186298	0.179424	0.202446	0.194975	0.18778	0.180851	0.174177	0.197192	0.189915	0.182907	0.176157
	OUTPUTS	2030	2080	2130		1.78	2070.58	#REF!	5.84018	5.5	15244.6	20.5115	3.58329	46.4719	0.232359	2.4383		46.4719	11.8437	147.31	34.6281		46.4719	7.27981	340.653	39.192		0	3.252	511.068	-3.252		1.78			0.19794	0.190636	0.183601	0.176826	0.170301	0.19141	0.184346	0.177544	0.170992	0.164682	0.185813	0.178956	0.172352	0.165992
	Optimal Level of Flood Defense	2.5	2.86	3.24		1.8	2084.18	#REF!	5.9058	5.5	15244.6	20.5115	3.58329	50.0552	0.250276	2.68858		50.0552	12.4031	143.726	37.652		50.0552	7.70625	337.069	42.3489		0	3.528	511.068	-3.528		1.8			0.188304	0.181356	0.174663	0.168218	0.16201	0.181293	0.174603	0.16816	0.161954	0.155978	0.175311	0.168842	0.162611	0.156611
	Maximum height of Walls					1.82	2097.43	#REF!	5.97142	5.5	15244.6	20.5115	3.58329	53.6384	0.268192	2.95677		53.6384	12.9763	140.143	40.6622		53.6384	8.14587	333.486	45.4926		0	3.81629	511.068	-3.81629		1.82			0.179589	0.172962	0.166579	0.160432	0.154512	0.172048	0.165699	0.159584	0.153695	0.148023	0.165641	0.159529	0.153642	0.147972
	Average height of Walls	1.72	1.864	1.984		1.84	2110.34	#REF!	6.03704	6	28717.5	38.639	6.75011	60.3886	0.301943	3.25871		60.3886	13.5632	133.393	46.8254		60.3886	8.59873	326.736	51.7898		43.0036	4.11695	468.064	38.8866		1.84			0.171773	0.165434	0.15933	0.15345	0.147787	0.163654	0.157615	0.151799	0.146197	0.140802	0.156782	0.150996	0.145424	0.140058
	Average Elevation of wall	0.78	0.996	1.256		1.86	2122.95	#REF!	6.10266	6	28717.5	38.639	6.75011	67.1387	0.335693	3.59441		67.1296	14.1639	126.652	52.9657		67.1387	9.06491	319.986	58.0738		67.1387	4.43006	443.929	62.7086		1.86			0.165657	0.159543	0.153656	0.147986	0.142525	0.156869	0.15108	0.145505	0.140135	0.134964	0.149454	0.143939	0.138627	0.133512
	Wall Length	2426.13	2549.69	2660.85		1.88	2135.26	#REF!	6.16828	6	28717.5	38.639	6.75011	73.8888	0.369444	3.96385		73.5471	14.7786	120.234	58.7685		73.8888	9.54448	313.236	64.3443		73.8888	4.75573	437.179	69.1331		1.88			0.160951	0.155012	0.149291	0.143782	0.138476	0.151406	0.145819	0.140438	0.135255	0.130264	0.143374	0.138083	0.132988	0.12808
	Cost of Wall	41.0551	50.6728	59.91		1.9	2147.3	#REF!	6.2339	6	28717.5	38.639	6.75011	80.6389	0.403194	4.36705		79.6831	15.4072	114.098	64.2759		80.6389	10.0375	306.486	70.6014		80.6389	5.09402	430.429	75.5449		1.9			0.157465	0.151654	0.146058	0.140668	0.135477	0.147074	0.141647	0.13642	0.131386	0.126537	0.138352	0.133246	0.128329	0.123594
	Expected Benefit	186.447	379.762	503.953		1.92	2159.08	#REF!	6.29952	6	28717.5	38.639	6.75011	87.389	0.436945	4.80399		85.5756	16.0499	108.206	69.5257		87.389	10.5441	299.735	76.8449		87.389	5.44503	423.679	81.944		1.92			0.155072	0.14935	0.143839	0.138531	0.133419	0.14375	0.138445	0.133336	0.128416	0.123677	0.134264	0.129309	0.124538	0.119942
	Net Benefit	145.392	329.089	444.043		1.94	2170.6	#REF!	6.36514	6	28717.5	38.639	6.75011	94.1391	0.470696	5.27469		91.2601	16.7068	102.521	74.5533		94.1391	11.0642	292.985	83.0749		94.1391	5.80883	416.928	88.3303		1.94			0.153693	0.148021	0.142559	0.137299	0.132232	0.141352	0.136136	0.131112	0.126274	0.121614	0.131031	0.126196	0.121539	0.117054
	Residual Damage	7.33439	7.36263	7.11477		1.96	2181.89	#REF!	6.43076	6	28717.5	38.639	6.75011	100.889	0.504446	5.77913		96.7703	17.3777	97.0113	79.3925		100.889	11.598	286.235	89.2912		100.889	6.1855	410.178	94.7037		1.96			0.153276	0.14762	0.142172	0.136926	0.131873	0.13983	0.13467	0.129701	0.124915	0.120305	0.128602	0.123857	0.119286	0.114884
	Expected Damage	193.782	387.124	511.068		1.98	2192.96	#REF!	6.49638	6	28717.5	38.639	6.75011	107.639	0.538197	6.31733		102.139	18.063	91.6424	84.0762		107.639	12.1455	279.485	95.4938		107.639	6.57512	403.428	101.064		1.98			0.153788	0.148113	0.142647	0.137383	0.132314	0.139153	0.134018	0.129072	0.124309	0.119722	0.126946	0.122262	0.11775	0.113405
						2	2203.81	#REF!	6.562	6.5	20284.7	27.2929	4.76798	112.407	0.562037	6.87937		107.382	18.7625	86.3998	88.6193		112.407	12.7069	274.717	99.7004		112.407	6.97777	398.66	105.43		2			0.155265	0.149536	0.144017	0.138703	0.133584	0.139298	0.134158	0.129207	0.124439	0.119847	0.126042	0.121391	0.116911	0.112597
	Surge height (ft)	Area submerged (sq m)	delta Area (sq m)	Building numbers	Building Values (million $)	2.02	2214.46	#REF!	6.62762	6.5	20284.7	27.2929	4.76798	117.175	0.585876	7.46524		112.506	19.4764	81.2752	93.03		117.175	13.282	269.949	103.893		117.175	7.39352	393.892	109.782		2.02			0.155346	0.149614	0.144093	0.138775	0.133654	0.140101	0.134931	0.129952	0.125156	0.120538	0.125694	0.121055	0.116588	0.112286
0.9144	3	5737	0	0	0	2.04	2224.92	#REF!	6.69324	6.5	20284.7	27.2929	4.76798	121.943	0.609716	8.07496		117.516	20.2047	76.2652	97.3118		121.943	13.8711	265.181	108.072		121.943	7.82245	389.124	114.121		2.04			0.154122	0.148434	0.142957	0.137682	0.132601	0.139685	0.13453	0.129566	0.124784	0.12018	0.125977	0.121328	0.116851	0.112539
1.0668	3.5	15741.3	10004.3	0	0	2.06	2235.19	#REF!	6.75886	6.5	20284.7	27.2929	4.76798	126.711	0.633556	8.70851		122.41	20.9474	71.3717	101.462		126.711	14.4742	260.413	112.237		126.711	8.26462	384.356	118.447		2.06			0.151705	0.146106	0.140715	0.135522	0.130521	0.138138	0.13304	0.128131	0.123403	0.118849	0.125198	0.120578	0.116128	0.111843
1.2192	4	34263.3	18522	24.9212	4.35364	2.08	2245.28	#REF!	6.82448	6.5	20284.7	27.2929	4.76798	131.479	0.657396	9.36591		127.181	21.7047	66.6003	105.477		131.479	15.0913	255.645	116.388		131.479	8.7201	379.588	122.759		2.08			0.148221	0.142752	0.137484	0.13241	0.127524	0.135567	0.130565	0.125747	0.121106	0.116637	0.123444	0.118889	0.114501	0.110276
1.3716	4.5	88270.5	54007.2	72.6661	12.6945	2.1	2255.21	#REF!	6.8901	6.5	20284.7	27.2929	4.76798	136.247	0.681236	10.0471		131.823	22.4766	61.959	109.346		136.247	15.7225	250.877	120.525		136.247	9.18898	374.82	127.058		2.1			0.143808	0.138501	0.13339	0.128468	0.123727	0.13209	0.127215	0.122521	0.118	0.113645	0.120813	0.116355	0.112061	0.107926
1.524	5	121982	33711.4	45.3583	7.92395	2.12	2264.97	#REF!	6.95572	6.5	20284.7	27.2929	4.76798	141.015	0.705076	10.7522		136.324	23.2631	57.4579	113.061		141.015	16.3678	246.109	124.647		141.015	9.6713	370.052	131.344		2.12			0.138605	0.13349	0.128564	0.12382	0.119251	0.127829	0.123112	0.118569	0.114193	0.109979	0.117412	0.11308	0.108907	0.104888
1.6764	5.5	243939	121957	164.092	28.6663	2.14	2274.57	#REF!	7.02134	7	15424.5	20.7535	3.62557	144.641	0.723204	11.4754		140.671	24.0643	53.1108	116.607		144.641	17.0273	242.484	127.613		144.641	10.1672	366.427	134.474		2.14			0.132753	0.127854	0.123136	0.118592	0.114216	0.12291	0.118375	0.114006	0.109799	0.105747	0.113354	0.109171	0.105142	0.101262
1.8288	6	473679	229740	309.112	54.0009	2.16	2284.02	#REF!	7.08696	7	15424.5	20.7535	3.62557	148.266	0.741332	12.2168		144.85	24.8802	48.9315	119.97		148.266	17.7012	238.858	130.565		148.266	10.6766	362.801	137.59		2.16			0.126324	0.121662	0.117173	0.112849	0.108684	0.1174	0.113067	0.108895	0.104877	0.101006	0.108695	0.104684	0.100821	0.0971007
1.9812	6.5	615672	141993	191.05	33.3758	2.18	2293.33	#REF!	7.15258	7	15424.5	20.7535	3.62557	151.892	0.759459	12.9762		148.848	25.7109	44.9335	123.137		151.892	18.3893	235.233	133.503		151.892	11.1997	359.176	140.692		2.18			0.119469	0.11506	0.110814	0.106725	0.102787	0.111436	0.107324	0.103363	0.0995489	0.0958754	0.103563	0.0997418	0.0960611	0.0925163
2.1336	7	739068	123396	166.028	29.0046	2.2	2302.49	#REF!	7.2182	7	15424.5	20.7535	3.62557	155.517	0.777587	13.7538		152.652	26.5565	41.1297	126.095		155.517	19.0918	231.607	136.426		155.517	11.7365	355.55	143.781		2.2			0.112327	0.108182	0.104189	0.100345	0.0966417	0.105148	0.101268	0.0975307	0.0939316	0.0904654	0.0980776	0.0944584	0.0909727	0.0876156
2.286	7.5	1.22891e+06	489842	659.078	115.139	2.22	2311.53	#REF!	7.28382	7	15424.5	20.7535	3.62557	159.143	0.795715	14.5495		156.25	27.417	37.5315	128.833		159.143	19.8088	227.981	139.334		159.143	12.2871	351.925	146.856		2.22			0.105021	0.101146	0.0974132	0.0938184	0.0903564	0.0986529	0.0950125	0.0915063	0.0881296	0.0848774	0.092348	0.0889402	0.0856581	0.0824972
2.4384	8	1.49786e+06	268949	361.868	63.2171	2.24	2320.43	#REF!	7.34944	7	15424.5	20.7535	3.62557	162.769	0.813843	15.3634		159.635	28.2924	34.1464	131.343		162.769	20.5402	224.356	142.228		162.769	12.8515	348.299	149.917		2.24			0.097663	0.0940591	0.0905881	0.0872453	0.0840257	0.0920566	0.0886596	0.0853879	0.0822369	0.0792022	0.0864746	0.0832835	0.0802102	0.0772503
2.5908	8.5	1.67704e+06	179176	241.08	42.1158	2.26	2329.21	#REF!	7.41506	7	15424.5	20.7535	3.62557	166.394	0.831971	16.1953		162.803	29.1828	30.9784	133.62		166.394	21.2862	220.73	145.108		166.394	13.4299	344.673	152.964		2.26			0.0903485	0.0870145	0.0838035	0.080711	0.0777326	0.0854517	0.0822983	0.0792614	0.0763365	0.0735195	0.0805463	0.077574	0.0747113	0.0719543
2.7432	9	1.86083e+06	183790	247.287	43.2003	2.28	2337.86	#REF!	7.48068	7	15424.5	20.7535	3.62557	170.02	0.850099	17.0454		165.753	30.0883	28.0286	135.665		170.02	22.0468	217.105	147.973		170.02	14.0222	341.048	155.998		2.28			0.0831597	0.080091	0.0771354	0.074289	0.0715476	0.0789182	0.076006	0.0732012	0.0705	0.0678984	0.0746409	0.0718865	0.0692337	0.0666789
2.8956	9.5	2025333	164508	221.343	38.6679	2.3	2346.4	#REF!	7.5463	7.5	69977.5	94.154	16.4484	186.468	0.932341	17.9778		168.496	31.0089	25.2857	137.487		184.878	22.822	202.246	162.056		186.468	14.6285	324.599	171.84		2.3			0.0761653	0.0733547	0.0706478	0.0680407	0.0655299	0.0725243	0.069848	0.0672705	0.0647881	0.0623973	0.0688253	0.0662855	0.0638394	0.0614837
3.048	10	2182013	156680	210.811	36.828	2.32	2354.83	#REF!	7.61192	7.5	69977.5	94.154	16.4484	202.917	1.01458	18.9924		171.042	31.9446	22.7396	139.097		199.023	23.6119	188.101	175.411		202.917	15.2489	308.151	187.668		2.32			0.06967	0.067099	0.064623	0.0622382	0.0599415	0.0665638	0.0641074	0.0617417	0.0594634	0.057269	0.0633817	0.0610428	0.0587902	0.0566208
3.2004	10.5	2.33491e+06	152901	205.726	35.9397	2.34	2363.15	#REF!	7.67754	7.5	69977.5	94.154	16.4484	219.365	1.09682	20.0892		173.401	32.8955	20.3811	140.505		212.529	24.4166	174.596	188.112		219.365	15.8835	291.703	203.481		2.34			0.063617	0.0612694	0.0590085	0.056831	0.0547338	0.0609876	0.058737	0.0565695	0.054482	0.0524715	0.0582684	0.0561182	0.0540474	0.0520529
3.3528	11	2.47607e+06	141156	189.924	33.1791	2.36	2371.36	#REF!	7.74316	7.5	69977.5	94.154	16.4484	235.813	1.17907	21.2682		175.58	33.8616	18.2017	141.718		225.449	25.2361	161.675	200.213		235.813	16.5322	275.254	219.281		2.36			0.0579628	0.0558238	0.0537638	0.0517798	0.0498691	0.0557583	0.0537007	0.051719	0.0498105	0.0479724	0.0534536	0.0514811	0.0495814	0.0477517
3.5052	11.5	2.62014e+06	144066	193.839	33.863	2.38	2379.47	#REF!	7.80878	7.5	69977.5	94.154	16.4484	252.262	1.26131	22.5296		177.588	34.843	16.1934	142.745		237.818	26.0704	149.306	211.748		252.262	17.1953	258.806	235.066		2.38			0.052674	0.0507302	0.0488582	0.0470552	0.0453188	0.0508477	0.0489713	0.0471642	0.0454237	0.0437475	0.0489138	0.0471088	0.0453704	0.0436961
3.6576	12	2.72039e+06	100255	134.892	23.5652	2.4	2387.48	#REF!	7.8744	7.5	69977.5	94.154	16.4484	268.71	1.34355	23.8731		179.433	35.8398	14.3482	143.594		249.659	26.9197	137.465	222.739		268.71	17.8726	242.358	250.837		2.4			0.0477256	0.0459644	0.0442682	0.0426346	0.0410613	0.0462349	0.0445287	0.0428855	0.041303	0.0397788	0.0446318	0.0429848	0.0413986	0.0398709
3.81	12.5	2.82316e+06	102773	138.28	24.1571	2.42	2395.39	#REF!	7.94002	7.5	69977.5	94.154	16.4484	285.158	1.42579	25.2989		181.123	36.8519	12.6585	144.271		260.981	27.7838	126.144	233.197		285.158	18.5643	225.909	266.594		2.42			0.0430986	0.0415082	0.0399764	0.0385012	0.0370805	0.0419044	0.0403581	0.0388688	0.0374345	0.0360531	0.0405956	0.0390975	0.0376547	0.0362652
3.9624	13	2.90969e+06	86524.4	116.418	20.3378	2.44	2403.21	#REF!	8.00564	8	33618.6	45.2335	7.90214	293.061	1.4653	26.7642		182.663	37.8795	11.119	144.783		271.77	28.663	115.355	243.107		293.061	19.2704	218.007	273.79		2.44			0.0387786	0.0373476	0.0359694	0.0346421	0.0333637	0.037845	0.0364484	0.0351034	0.033808	0.0325605	0.0367964	0.0354385	0.0341308	0.0328713
4.1148	13.5	3.02569e+06	116000	156.077	27.2662	2.46	2410.94	#REF!	8.07126	8	33618.6	45.2335	7.90214	300.963	1.50481	28.269		184.058	38.9225	9.72329	145.136		282.012	29.5573	105.112	252.455		300.963	19.991	210.105	280.972		2.46			0.0346989	0.0334184	0.0321852	0.0309975	0.0298537	0.0339936	0.0327392	0.0315311	0.0303675	0.0292469	0.0331752	0.031951	0.0307719	0.0296364
4.2672	14	3.13853e+06	112843	151.829	26.524	2.48	2418.58	#REF!	8.13688	8	33618.6	45.2335	7.90214	308.865	1.54432	29.8133		185.317	39.981	8.46436	145.336		291.694	30.4666	95.4306	261.227		308.865	20.7262	202.203	288.139		2.48			0.0308761	0.0297368	0.0286394	0.0275826	0.0265647	0.0303686	0.0292479	0.0281686	0.0271291	0.026128	0.0297514	0.0286535	0.0275961	0.0265778
4.4196	14.5	3.26738e+06	128849	173.364	30.2862	2.5	2426.13	#REF!	8.2025	8	33618.6	45.2335	7.90214	316.767	1.58384	31.3972		186.447	41.0551	7.33439	145.392		300.801	31.3911	86.3231	269.41		316.767	21.4759	194.301	295.291		2.5			0.0273209	0.0263127	0.0253417	0.0244065	0.0235059	0.0269821	0.0259864	0.0250275	0.0241039	0.0232144	0.0265385	0.0255592	0.024616	0.0237077
4.572	15	3.38168e+06	114302	153.792	26.867	2.52	2433.6	#REF!	8.26812	8	33618.6	45.2335	7.90214	324.669	1.62335	33.0205		187.456	42.1448	6.32521	145.312		309.326	32.3307	77.7983	276.995		324.669	22.2403	186.398	302.429		2.52			0.0240381	0.0231511	0.0222968	0.021474	0.0206815	0.0238412	0.0229614	0.0221141	0.021298	0.0205121	0.0235455	0.0226766	0.0218398	0.0210339
4.7244	15.5	3.52661e+06	144924	194.994	34.0648	2.54	2440.99	#REF!	8.33374	8	33618.6	45.2335	7.90214	332.571	1.66286	34.6834		188.353	43.2502	5.42841	145.103		317.267	33.2856	69.8572	283.982		332.571	23.0193	178.496	309.552		2.54			0.0210281	0.0202521	0.0195048	0.018785	0.0180918	0.0209482	0.0201752	0.0194307	0.0187136	0.0180231	0.0207765	0.0200099	0.0192714	0.0185603
4.8768	16	3.62046e+06	93858.2	126.285	22.0616	2.56	2448.3	#REF!	8.39936	8	33618.6	45.2335	7.90214	340.473	1.70237	36.3857		189.146	44.3712	4.63547	144.775		324.63	34.2558	62.4942	290.374		340.473	23.8131	170.594	316.66		2.56			0.0182871	0.0176122	0.0169623	0.0163364	0.0157335	0.0183017	0.0176263	0.0169759	0.0163494	0.0157461	0.0182321	0.0175593	0.0169113	0.0162873
5.0292	16.5	3.69926e+06	78797.3	106.021	18.5215	2.58	2455.53	#REF!	8.46498	8	33618.6	45.2335	7.90214	348.376	1.74188	38.1276		189.844	45.5079	3.93794	144.336		331.426	35.2413	55.6982	296.185		348.376	24.6217	162.692	323.754		2.58			0.0158078	0.0152244	0.0146626	0.0141215	0.0136004	0.0158967	0.0153101	0.0147451	0.014201	0.0136769	0.0159094	0.0153223	0.0147569	0.0142123
5.1816	17	3.78731e+06	88052.8	118.474	20.697	2.6	2462.69	#REF!	8.5306	8.5	22397	30.135	5.26448	353.64	1.7682	39.8958		190.454	46.6605	3.3277	143.793		337.669	36.2422	49.4554	301.427		353.64	25.4451	157.428	328.195		2.6			0.0135803	0.0130791	0.0125965	0.0121317	0.011684	0.0137256	0.0132191	0.0127313	0.0122615	0.011809	0.0138028	0.0132935	0.0128029	0.0123305
5.334	17.5	3.85214e+06	64829.1	87.2269	15.2382	2.62	2469.78	#REF!	8.59622	8.5	22397	30.135	5.26448	358.905	1.79452	41.6903		190.985	47.8288	2.79679	143.156		343.377	37.2585	43.7474	306.118		358.905	26.2835	152.163	332.621		2.62			0.0115886	0.011161	0.0107491	0.0103525	0.00997045	0.0117747	0.0113402	0.0109217	0.0105187	0.0101305	0.0119007	0.0114615	0.0110386	0.0106312
5.4864	18	3.90588e+06	53735	72.2999	12.6305	2.64	2476.79	#REF!	8.66184	8.5	22397	30.135	5.26448	364.169	1.82084	43.5112		191.444	49.013	2.33747	142.431		348.572	38.2903	38.5521	310.282		364.169	27.1367	146.899	337.032		2.64			0.00982126	0.00945884	0.00910979	0.00877362	0.00844986	0.0100344	0.00966416	0.00930753	0.00896406	0.00863327	0.0101955	0.00981929	0.00945694	0.00910796
						2.66	2483.73	#REF!	8.72746	8.5	22397	30.135	5.26448	369.433	1.84717	45.3584		191.839	50.2131	1.94236	141.626		353.28	39.3376	33.8445	313.942		369.433	28.005	141.634	341.428		2.66			0.00826461	0.00795963	0.0076659	0.00738302	0.00711057	0.00849347	0.00818005	0.00787819	0.00758747	0.00730748	0.00867784	0.00835761	0.0080492	0.00775217
					914.387	2.68	2490.61	#REF!	8.79308	8.5	22397	30.135	5.26448	374.698	1.87349	47.2318		192.177	51.4291	1.60446	140.748		357.527	40.4004	29.5975	317.126		374.698	28.8883	136.37	345.81		2.68			0.00690386	0.0066491	0.00640373	0.00616742	0.00593983	0.0071389	0.00687546	0.00662174	0.00637739	0.00614205	0.00733659	0.00706586	0.00680511	0.00655399
						2.7	2497.42	#REF!	8.8587	8.5	22397	30.135	5.26448	379.962	1.89981	49.1317		192.464	52.6611	1.3172	139.803		361.342	41.4789	25.7828	319.863		379.962	29.7867	131.105	350.176		2.7			0.00572341	0.00551221	0.0053088	0.00511289	0.00492422	0.00595693	0.00573711	0.0055254	0.0053215	0.00512513	0.00615973	0.00593242	0.00571351	0.00550267
						2.72	2504.16	#REF!	8.92432	8.5	22397	30.135	5.26448	385.227	1.92613	51.0578		192.707	53.9091	1.07448	138.798		364.753	42.5729	22.3712	322.18		385.227	30.7002	125.841	354.527		2.72			0.0047073	0.0045336	0.0043663	0.00420517	0.00404999	0.00493326	0.00475122	0.00457589	0.00440703	0.0042444	0.00513454	0.00494507	0.00476258	0.00458684
12 foot wall						2.74	2510.85	#REF!	8.98994	8.5	22397	30.135	5.26448	390.491	1.95246	53.0102		192.911	55.1732	0.870691	137.738		367.791	43.6827	19.3333	324.108		390.491	31.6289	120.576	358.862		2.74			0.0038396	0.00369791	0.00356145	0.00343003	0.00330345	0.00405346	0.00390388	0.00375982	0.00362107	0.00348745	0.00424803	0.00409127	0.00394029	0.00379489
4.44	Cost	233.201				2.76	2517.47	#REF!	9.05556	9	26255.7	35.3268	6.17147	396.663	1.98331	54.9936		193.081	56.4534	0.700676	136.628		370.485	44.8081	16.6396	325.677		396.663	32.5728	114.405	364.09		2.76			0.00310469	0.00299012	0.00287978	0.00277351	0.00267116	0.00330321	0.00318132	0.00306392	0.00295086	0.00284196	0.00348719	0.00335851	0.00323457	0.00311521
4.656	Cost	265.866				2.78	2524.03	#REF!	9.12118	9	26255.7	35.3268	6.17147	402.834	2.01417	57.0077		193.222	57.7497	0.559779	135.472		372.863	45.9494	14.2613	326.914		402.834	33.532	108.233	369.302		2.78			0.00248774	0.00239594	0.00230752	0.00222237	0.00214036	0.00266884	0.00257036	0.00247551	0.00238416	0.00229618	0.00283949	0.00273471	0.0026338	0.0025366
4.916	Cost	307.549				2.8	2530.53	#REF!	9.1868	9	26255.7	35.3268	6.17147	409.006	2.04503	59.0528		193.338	59.0622	0.443819	134.276		374.954	47.1064	12.1705	327.848		409.006	34.5065	102.062	374.499		2.8			0.00197432	0.00190146	0.0018313	0.00176372	0.00169863	0.00213688	0.00205802	0.00198208	0.00190894	0.00183849	0.00229244	0.00220784	0.00212637	0.0020479
						2.82	2536.97	#REF!	9.25242	9	26255.7	35.3268	6.17147	415.177	2.07589	61.1287		193.433	60.3909	0.349065	133.042		376.784	48.2793	10.3405	328.505		415.177	35.4964	95.8903	379.681		2.82			0.00155096	0.00149372	0.0014386	0.00138551	0.00133439	0.00169464	0.0016321	0.00157187	0.00151387	0.001458	0.00183417	0.00176648	0.0017013	0.00163852
						2.84	2543.36	#REF!	9.31804	9	26255.7	35.3268	6.17147	421.349	2.10674	63.2354		193.509	61.7359	0.272218	131.773		378.379	49.4681	8.74588	328.91		421.349	36.5017	89.7189	384.847		2.84			0.00120521	0.00116074	0.0011179	0.00107665	0.00103692	0.00133032	0.00128123	0.00123395	0.00118842	0.00114456	0.00145356	0.00139992	0.00134826	0.00129851
						2.86	2549.69	#REF!	9.38366	9	26255.7	35.3268	6.17147	427.52	2.1376	65.373		193.571	63.0971	0.21038	130.474		379.762	50.6728	7.36263	329.089		427.52	37.5225	83.5474	389.998		2.86			0.000925734	0.000891573	0.000858672	0.000826985	0.000796468	0.00103307	0.000994951	0.000958236	0.000922875	0.000888819	0.00114031	0.00109823	0.00105771	0.00101868
						2.88	2555.96	#REF!	9.44928	9	26255.7	35.3268	6.17147	433.692	2.16846	67.5415		193.621	64.4747	0.161026	129.146		380.956	51.8935	6.16829	329.063		433.692	38.5587	77.3759	395.133		2.88			0.000702271	0.000676356	0.000651397	0.000627359	0.000604209	0.000793007	0.000763744	0.00073556	0.000708416	0.000682275	0.000884957	0.0008523	0.000820849	0.000790558
						2.9	2562.19	#REF!	9.5149	9.5	20563.5	27.6679	4.83349	438.525	2.19263	69.7341		193.66	65.8687	0.121976	127.791		381.982	53.1302	5.14202	328.852		438.525	39.6105	72.5425	398.915		2.9			0.000525663	0.000506265	0.000487583	0.00046959	0.000452261	0.000601214	0.000579028	0.000557661	0.000537082	0.000517263	0.000678894	0.000653841	0.000629713	0.000606476
						2.92	2568.36	#REF!	9.58052	9.5	20563.5	27.6679	4.83349	443.359	2.21679	71.9509		193.69	67.279	0.09136	126.411		382.86	54.3829	4.26452	328.477		443.359	40.6779	67.709	402.681		2.92			0.000387781	0.000373471	0.000359689	0.000346416	0.000333633	0.000449712	0.000433117	0.000417134	0.000401741	0.000386916	0.000514348	0.000495367	0.000477087	0.000459482
						2.94	2574.48	#REF!	9.64614	9.5	20563.5	27.6679	4.83349	448.192	2.24096	74.1918		193.714	68.7058	0.0675845	125.008		383.606	55.6517	3.51803	327.955		448.192	41.7609	62.8755	406.431		2.94			0.000281588	0.000271197	0.000261189	0.000251551	0.000242268	0.000331535	0.000319301	0.000307518	0.00029617	0.000285241	0.000384484	0.000370296	0.000356631	0.000343471
						2.96	2580.56	#REF!	9.71176	9.5	20563.5	27.6679	4.83349	453.026	2.26513	76.457		193.732	70.1491	0.0493065	123.583		384.238	56.9367	2.88629	327.301		453.026	42.8596	58.042	410.166		2.96			0.000200995	0.000193578	0.000186434	0.000179554	0.000172929	0.000240595	0.000231716	0.000223166	0.00021493	0.000206999	0.000283271	0.000272818	0.000262751	0.000253055
						2.98	2586.58	#REF!	9.77738	9.5	20563.5	27.6679	4.83349	457.859	2.2893	78.7463		193.746	71.6089	0.0354033	122.137		384.77	58.2378	2.35452	326.532		457.859	43.974	53.2085	413.885		2.98			0.0001408	0.000135604	0.0001306	0.00012578	0.000121139	0.000171632	0.000165298	0.000159199	0.000153324	0.000147666	0.000205447	0.000197866	0.000190564	0.000183532
						3	2592.55	#REF!	9.843	9.5	20563.5	27.6679	4.83349	462.693	2.31346	81.0597		193.757	73.0853	0.0249459	120.671		385.215	59.5551	1.90939	325.66		462.693	45.1042	48.375	417.588		3			9.66177e-05	9.30523e-05	8.96185e-05	8.63114e-05	8.31263e-05	0.000120162	0.000115728	0.000111457	0.000107344	0.000103383	0.000146475	0.00014107	0.000135864	0.00013085
						3.02	2598.48	#REF!	9.90862	9.5	20563.5	27.6679	4.83349	467.526	2.33763	83.3973		193.764	74.5782	0.0171732	119.186		385.585	60.8887	1.53892	324.697		467.526	46.2501	43.5415	421.276		3.02			6.48046e-05	6.24131e-05	6.011e-05	5.78918e-05	5.57555e-05	8.24109e-05	7.93697e-05	7.64408e-05	7.362e-05	7.09033e-05	0.000102493	9.8711e-05	9.50684e-05	9.15602e-05
						3.04	2604.37	#REF!	9.97424	9.5	20563.5	27.6679	4.83349	472.36	2.3618	85.7591		193.77	76.0878	0.0114683	117.682		385.892	62.2386	1.23241	323.653		472.36	47.4119	38.708	424.948		3.04			4.23778e-05	4.0814e-05	3.93079e-05	3.78573e-05	3.64603e-05	5.52466e-05	5.32079e-05	5.12444e-05	4.93534e-05	4.75321e-05	7.02561e-05	6.76635e-05	6.51666e-05	6.27619e-05
						3.06	2610.2	#REF!	10.0399	10	19585	26.3514	4.6035	476.963	2.38482	88.144		193.774	77.614	0.00733684	116.16		386.144	63.6048	0.980376	322.539		476.963	48.5896	34.1045	428.373		3.06			2.69364e-05	2.59424e-05	2.49851e-05	2.40631e-05	2.31751e-05	3.61093e-05	3.47768e-05	3.34935e-05	3.22575e-05	3.10672e-05	4.70746e-05	4.53374e-05	4.36644e-05	4.20531e-05
						3.08	2616	#REF!	10.1055	10	19585	26.3514	4.6035	481.567	2.40783	90.5518		193.777	79.1569	0.00438722	114.62		386.35	64.9873	0.774472	321.363		481.567	49.7832	29.501	431.783		3.08			1.65815e-05	1.59696e-05	1.53803e-05	1.48128e-05	1.42661e-05	2.29406e-05	2.2094e-05	2.12787e-05	2.04935e-05	1.97372e-05	3.07528e-05	2.96179e-05	2.8525e-05	2.74723e-05
						3.1	2621.75	#REF!	10.1711	10	19585	26.3514	4.6035	486.17	2.43085	92.9826		193.779	80.7166	0.00233922	113.063		386.517	66.3863	0.607375	320.131		485.991	50.9928	25.0762	434.999		3.1			9.84204e-06	9.47885e-06	9.12906e-06	8.79218e-06	8.46774e-06	1.4115e-05	1.35942e-05	1.30925e-05	1.26094e-05	1.21441e-05	1.95281e-05	1.88075e-05	1.81135e-05	1.74451e-05
						3.12	2627.45	#REF!	10.2367	10	19585	26.3514	4.6035	490.774	2.45387	95.4365		193.781	82.293	0.000940722	111.488		386.652	67.8016	0.472713	318.85		489.84	52.2183	21.2276	437.622		3.12			0	0	0	0	0	8.37419e-06	8.06516e-06	7.76754e-06	7.48091e-06	7.20485e-06	1.20099e-05	1.15667e-05	1.11399e-05	1.07288e-05
						3.14	2633.12	#REF!	10.3023	10	19585	26.3514	4.6035	495.377	2.47689	97.9134		193.782	83.8862	0	109.895		386.759	69.2335	0.364977	317.526		493.174	53.4599	17.8938	439.714		3.14			0	0	0	0	0	0	0	0	0	0	7.1221e-06	6.85928e-06	6.60616e-06	6.36238e-06
						3.16	2638.74	#REF!	10.368	10	19585	26.3514	4.6035	499.981	2.4999	100.413							386.845	70.6818	0.279438	316.163		496.049	54.7176	15.0182	441.332		3.16			0	0	0	0	0	0	0	0	0	0	0	0	0	0
						3.18	2644.33	#REF!	10.4336	10	19585	26.3514	4.6035	504.584	2.52292	102.936							386.912	72.1467	0.21206	314.766		498.519	55.9914	12.5484	442.528		3.18
						3.2	2649.87	#REF!	10.4992	10	19585	26.3514	4.6035	509.188	2.54594	105.482							386.965	73.6282	0.159429	313.337		500.631	57.2814	10.4363	443.35		3.2
						3.22	2655.38	#REF!	10.5648	10.5	21843	29.3895	5.13425	514.322	2.57161	108.054							387.006	75.1263	0.118675	311.879		502.429	58.5876	8.63834	443.842		3.22
						3.24	2660.85	#REF!	10.6304	10.5	21843	29.3895	5.13425	519.456	2.59728	110.651							387.037	76.6411	0.0874077	310.396		503.953	59.91	7.11477	444.043		3.24
						3.26	2666.28	#REF!	10.6961	10.5	21843	29.3895	5.13425	524.59	2.62295	113.274							387.061	78.1725	0.0636491	308.888		505.238	61.2487	5.82987	443.989		3.26
						3.28	2671.67	#REF!	10.7617	10.5	21843	29.3895	5.13425	529.725	2.64862	115.923							387.079	79.7207	0.0457799	307.358		506.316	62.6037	4.75158	443.712		3.28
						3.3	2677.03	#REF!	10.8273	10.5	21843	29.3895	5.13425	534.859	2.67429	118.597							387.092	81.2856	0.0324847	305.806		507.216	63.975	3.85126	443.241		3.3
						3.32	2682.35	#REF!	10.8929	10.5	21843	29.3895	5.13425	539.993	2.69997	121.297							387.102	82.8673	0.0227052	304.234		507.964	65.3628	3.1035	442.601		3.32
						3.34	2687.63	#REF!	10.9585	10.5	21843	29.3895	5.13425	545.127	2.72564	124.023							387.109	84.4658	0.015635	302.643		508.582	66.7669	2.48584	441.815		3.34
						3.36	2692.88	#REF!	11.0242	11	17644.5	23.7405	4.14738	549.275	2.74637	126.769							387.114	86.0812	0.0105674	301.033		509.089	68.1875	1.97855	440.901		3.36
						3.38	2698.1	#REF!	11.0898	11	17644.5	23.7405	4.14738	553.422	2.76711	129.536							387.117	87.7135	0.00701374	299.404		509.503	69.6247	1.56439	439.879		3.38
						3.4	2703.28	#REF!	11.1554	11	17644.5	23.7405	4.14738	557.569	2.78785	132.324							387.12	89.3628	0.00455324	297.757		509.839	71.0783	1.22834	438.761		3.4
						3.42	2708.43	#REF!	11.221	11	17644.5	23.7405	4.14738	561.717	2.80858	135.132							387.122	91.029	0.00287364	296.093		510.11	72.5486	0.957439	437.562		3.42
						3.44	2713.55	#REF!	11.2866	11	17644.5	23.7405	4.14738	565.864	2.82932	137.962							387.123	92.7122	0.00175435	294.41		510.327	74.0354	0.740512	436.292		3.44
						3.46	2718.64	#REF!	11.3523	11	17644.5	23.7405	4.14738	570.012	2.85006	140.812							387.123	94.4124	0.00102091	292.711		510.5	75.5389	0.568028	434.961		3.46
						3.48	2723.69	#REF!	11.4179	11	17644.5	23.7405	4.14738	574.159	2.8708	143.683							387.124	96.1297	0.000556741	290.994		510.636	77.0591	0.431888	433.577		3.48
						3.5	2728.72	#REF!	11.4835	11	17644.5	23.7405	4.14738	578.306	2.89153	146.574							387.124	97.8641	0.000262594	289.26		510.742	78.596	0.32526	432.146		3.5
						3.52	2733.71	#REF!	11.5491	11.5	24011	32.3065	4.83758	583.144	2.91572	149.49							387.124	99.6156	9.47248e-05	287.509		510.825	80.1496	0.242419	430.676		3.52
						3.54	2738.67	#REF!	11.6147	11.5	24011	32.3065	4.83758	587.982	2.93991	152.43							387.124	101.384	0	285.74		510.889	81.7201	0.178602	429.169		3.54
						3.56	2743.61	#REF!	11.6804	11.5	24011	32.3065	4.83758	592.819	2.9641	155.394												510.938	83.3073	0.129878	427.63		3.56
						3.58	2748.51	#REF!	11.746	11.5	24011	32.3065	4.83758	597.657	2.98828	158.382												510.975	84.9114	0.0930267	426.063		3.58
						3.6	2753.39	#REF!	11.8116	11.5	24011	32.3065	4.83758	602.494	3.01247	161.395												511.002	86.5324	0.0654311	424.47		3.6
						3.62	2758.24	#REF!	11.8772	11.5	24011	32.3065	4.83758	607.332	3.03666	164.431												511.023	88.1703	0.0450154	422.852		3.62
						3.64	2763.06		11.9428	11.5	24011	32.3065	4.83758	612.169	3.06085	167.492												511.037	89.8252	0.0300949	421.212		3.64
						3.66	2767.85		12.0085	12	0	0	2.94565	615.115	3.07558	170.568												511.048	91.4971	0.0193211	419.551		3.66
						3.68	2772.61		12.0741	12	0	0	2.94565	618.061	3.0903	173.658												511.056	93.186	0.0116542	417.87		3.68
						3.7	2777.35		12.1397	12	0	0	2.94565	621.006	3.10503	176.763												511.061	94.892	0.00626476	416.169		3.7
						3.72	2782.06		12.2053	12	0	0	2.94565	623.952	3.11976	179.883												511.065	96.615	0.00253552	414.45		3.72
						3.74	2786.75		12.2709	12	0	0	2.94565	626.898	3.13449	183.017												511.068	98.3552	0	412.712		3.74
						3.76	2791.41		12.3366	12	0	0	2.94565	629.843	3.14922	186.167																	3.76
						3.78	2796.05		12.4022	12	0	0	2.94565	632.789	3.16394	189.33
						3.8	2800.66		12.4678	12	0	0	2.94565	635.735	3.17867	192.509
						3.82	2805.24		12.5334	12.5	0	0	3.01963	638.754	3.19377	195.703
						3.84	2809.8		12.599	12.5	0	0	3.01963	641.774	3.20887	198.912
						3.86	2814.34		12.6647	12.5	0	0	3.01963	644.794	3.22397	202.136
						3.88	2818.85		12.7303	12.5	0	0	3.01963	647.813	3.23907	205.375
						3.9	2823.34		12.7959	12.5	0	0	3.01963	650.833	3.25416	208.629
						3.92	2827.81		12.8615	12.5	0	0	3.01963	653.852	3.26926	211.898
						3.94	2832.25		12.9271	12.5	0	0	3.01963	656.872	3.28436	215.183
						3.96	2836.68		12.9928	12.5	0	0	3.01963	659.892	3.29946	218.482
						3.98	2841.07		13.0584	13	0	0	20.3378	680.229	3.40115	221.883
						4.44	2936.7												233.201
						4.66	2979.14																	265.866
						4.92	3026.95																						307.549
[truncated: 136 more columns]

## Sheet: Middletown_2
																																				3.5663	3.58418	3.60214	3.6202	3.63835	4.21786	4.239	4.26025	4.28161	4.30307	4.99847	5.02353	5.04871	5.07402
	INPUTS			ERROR CHECK		Surge Height	Wall Length (m)	sum of middleH * dL	Surge height (ft)	Rounding (ft)	delta Area (sq m)	Building numbers	Building Values (million $)	Cum Value	Marginal Damage	Damage	2030	Expected Benefit (million $, PV)	Total Cost (million $, PV)	Residual Dam (million $, PV)	Net Benefit (million $, PV)	2080	Expected Benefit (million $, PV)	Total Cost (million $, PV)	Residual Dam (million $, PV)	Net Benefit (million $, PV)	2130	Expected Benefit (million $, PV)	Total Cost (million $, PV)	Residual Dam (million $, PV)	Net Benefit (million $, PV)		Surge Height		2030	0	1	2	3	4	5	6	7	8	9	10	11	12	13
	SPATIAL DATA					1	947.152	#REF!	3.281	3	0	0	0	0	0	0		0	0.262217	98.288	-0.262217		0	8.66833e-05	164.578	-8.66833e-05		0	0.355055	223.063	-0.355055		1.98			0	1	2	3	4	5	6	7	8	9	10	11	12	13
	Target City	Middletown				1.02	976.585	#REF!	3.34662	3	0	0	0	0	0	0		0	0.321757	98.288	-0.321757		0	0.00321757	164.578	-0.00321757		0	0.311121	223.063	-0.311121		2			0	0	0	0	0	0	0	0	0	0	0	0	0	0
	Policy Year (base year: 2020)	#REF!				1.04	1005.7	#REF!	3.41224	3	0	0	0	0	0	0		0	0.388876	98.288	-0.388876		0	0.011137	164.578	-0.011137		0	0.268394	223.063	-0.268394		2.02			0	0	0	0	0	0	0	0	0	0	0	0	0	0
	SLR rate (before policy)	4.17	mm/year			1.06	1034.51	#REF!	3.47786	3	0	0	0	0	0	0		0	0.463923	98.288	-0.463923		0	0.0242376	164.578	-0.0242376		0	0.227322	223.063	-0.227322		2.04			0	0	0	0	0	0	0	0	0	0	0	0	0	0
	SLR rate (after policy)	#REF!	mm/year			1.08	1063.02	#REF!	3.54348	3.5	3054.13	0	0	0	0	0		0	0.54724	98.288	-0.54724		0	0.0429036	164.578	-0.0429036		0	0.188348	223.063	-0.188348		2.06			0	0	0	0	0	0	0	0	0	0	0	0	0	0
	MHHW	0.74	meter			1.1	1091.23	#REF!	3.6091	3.5	3054.13	0	0	0	0	0		0	0.639164	98.288	-0.639164		0	0.0675117	164.578	-0.0675117		0	0.151901	223.063	-0.151901		2.08			0	0	0	0	0	0	0	0	0	0	0	0	0	0
						1.12	1119.16	#REF!	3.67472	3.5	3054.13	0	0	0	0	0		0	0.740023	98.288	-0.740023		0	0.0984308	164.578	-0.0984308		0	0.118404	223.063	-0.118404		2.1			0	0	0	0	0	0	0	0	0	0	0	0	0	0
						1.14	1146.81	#REF!	3.74034	3.5	3054.13	0	0	0	0	0		0	0.850143	98.288	-0.850143		0	0.136023	164.578	-0.136023		0	0.0882679	223.063	-0.0882679		2.12			0	0	0	0	0	0	0	0	0	0	0	0	0	0
	GEV ESTIMATION					1.16	1174.19	#REF!	3.80596	3.5	3054.13	0	0	0	0	0		0	0.969841	98.288	-0.969841		0	0.180643	164.578	-0.180643		0	0.0618979	223.063	-0.0618979		2.14			0	0	0	0	0	0	0	0	0	0	0	0	0	0
	μ (location)	1.572				1.18	1201.3	#REF!	3.87158	3.5	3054.13	0	0	0	0	0		0	1.09943	98.288	-1.09943		0	0.232639	164.578	-0.232639		0	0.0396894	223.063	-0.0396894		2.16			0	0	0	0	0	0	0	0	0	0	0	0	0	0
	σ (scale)	0.1831				1.2	1228.15	#REF!	3.9372	3.5	3054.13	0	0	0	0	0		0	1.23922	98.288	-1.23922		0	0.292354	164.578	-0.292354		0	0.0220305	223.063	-0.0220305		2.18			0	0	0	0	0	0	0	0	0	0	0	0	0	0
	k (shape)	-0.1136				1.22	1254.76	#REF!	4.00282	4	5297.8	4.94545	1.15622	1.15622	0.0057811	0.0057811		0	1.38951	98.288	-1.38951		0	0.360123	164.578	-0.360123		0	0.00930166	223.063	-0.00930166		2.2			0	0	0	0	0	0	0	0	0	0	0	0	0	0
						1.24	1281.11	#REF!	4.06844	4	5297.8	4.94545	1.15622	2.31244	0.0115622	0.0173433		0.243317	1.5506	98.0447	-1.30728		0	0.436277	164.578	-0.436277		0	0.00187596	223.063	-0.00187596		2.22			0.00957536	0.00922202	0.00888171	0.00855395	0.0082383	0.00949684	0.00914639	0.00880887	0.0084838	0.00817073	0.00942117	0.00907351	0.00873868	0.00841621
	Coefficients of the cost function					1.26	1307.22	#REF!	4.13406	4	5297.8	4.94545	1.15622	3.46866	0.0173433	0.0346866		0.949955	1.72277	97.338	-0.77282		0	0.521139	164.578	-0.521139		0	0.000119637	223.063	-0.000119637		2.24			0.0240064	0.0231206	0.0222674	0.0214457	0.0206543	0.0238029	0.0229245	0.0220785	0.0212638	0.0204791	0.0236077	0.0227365	0.0218975	0.0210894
	coef1	0.465652				1.28	1333.1	#REF!	4.19968	4	5297.8	4.94545	1.15622	4.62488	0.0231244	0.057811		2.29737	1.90633	95.9906	0.391036		0	0.615029	164.578	-0.615029		0	0.00439219	223.063	-0.00439219		2.26			0.0401379	0.0386568	0.0372303	0.0358564	0.0345332	0.0397842	0.0383161	0.0369021	0.0355404	0.0342289	0.0394468	0.0379911	0.0365892	0.035239
	coef2	0.00045981				1.3	1358.75	#REF!	4.2653	4	5297.8	4.94545	1.15622	5.7811	0.0289055	0.0867164		4.41282	2.10156	93.8751	2.31126		0	0.71826	164.578	-0.71826		0	0.0150467	223.063	-0.0150467		2.28			0.0559468	0.0538823	0.0518939	0.0499789	0.0481346	0.0554315	0.053386	0.0514159	0.0495186	0.0476912	0.0549429	0.0529154	0.0509628	0.0490821
	coef3	1.02477e-07		Buildings exist under MHHW		1.32	1384.17	#REF!	4.33092	4	5297.8	4.94545	1.15622	6.93731	0.0346866	0.121403		6.93731	2.30873	91.3507	4.62859		0	0.831141	164.578	-0.831141		0	0.0324298	223.063	-0.0324298		2.3			0.0702176	0.0676265	0.0651309	0.0627275	0.0604127	0.0695375	0.0669715	0.0645001	0.0621199	0.0598276	0.068897	0.0663546	0.063906	0.0615477
	coef4	8.12818e-12				1.34	1409.37	#REF!	4.39654	4	5297.8	4.94545	1.15622	8.09353	0.0404677	0.161871		8.09353	2.52811	90.1944	5.56542		0	0.953976	164.578	-0.953976		0	0.0568825	223.063	-0.0568825		2.32			0.0823003	0.0792633	0.0763383	0.0735213	0.0708082	0.0814567	0.0784508	0.0755558	0.0727677	0.0700824	0.0806678	0.077691	0.074824	0.0720629
	q	3.58584e+06				1.36	1434.35	#REF!	4.46216	4	5297.8	4.94545	1.15622	9.24975	0.0462488	0.208119		9.24975	2.75999	89.0382	6.48976		0	1.08706	164.578	-1.08706		0	0.0887398	223.063	-0.0887398		2.34			0.0919311	0.0885387	0.0852714	0.0821248	0.0790942	0.090927	0.0875716	0.0843401	0.0812278	0.0782303	0.089995	0.086674	0.0834756	0.0803952
	Growth Rate	0.005	%/year			1.38	1459.12	#REF!	4.52778	4.5	5138.75	4.79697	1.12151	10.3713	0.0518563	0.259976		10.3713	3.00463	87.9167	7.36663		4.12292	1.2307	160.455	2.89222		0	0.128331	223.063	-0.128331		2.36			0.0991014	0.0954444	0.0919223	0.0885302	0.0852633	0.0979399	0.0943257	0.0908449	0.0874926	0.0842639	0.0968702	0.0932955	0.0898527	0.086537
	discount rate	0.0426	%/year			1.4	1483.69	#REF!	4.5934	4.5	5138.75	4.79697	1.12151	11.4928	0.0574638	0.31744		11.4928	3.26229	86.7952	8.23048		11.4928	1.38516	153.085	10.1076		0	0.17598	223.063	-0.17598		2.38			0.103894	0.10006	0.0963673	0.0928112	0.0893863	0.102578	0.0987923	0.0951467	0.0916356	0.0882541	0.101375	0.0976344	0.0940315	0.0905616
	useful_life	30	years			1.42	1508.05	#REF!	4.65902	4.5	5138.75	4.79697	1.12151	12.6143	0.0630714	0.380511		12.6143	3.53323	85.6737	9.08105		12.6143	1.55076	151.964	11.0635		0	0.232006	223.063	-0.232006		2.4			0.106586	0.102652	0.0988643	0.095216	0.0917023	0.105116	0.101237	0.0975014	0.0939034	0.0904382	0.103785	0.0999549	0.0962664	0.092714
	CapEx	0.005				1.44	1532.21	#REF!	4.72464	4.5	5138.75	4.79697	1.12151	13.7358	0.0686789	0.44919		13.7358	3.81771	84.5522	9.91807		13.7358	1.72775	150.842	12.008		0	0.296723	223.063	-0.296723		2.42			0.10749	0.103523	0.0997032	0.096024	0.0924805	0.105866	0.101959	0.098197	0.0945733	0.0910834	0.104407	0.100554	0.0968433	0.0932696
	Difference	0.02	meter			1.46	1556.18	#REF!	4.79026	4.5	5138.75	4.79697	1.12151	14.8573	0.0742864	0.523476		14.8573	4.11599	83.4307	10.7413		14.8573	1.91643	149.721	12.9409		0	0.370439	223.063	-0.370439		2.44			0.106925	0.10298	0.0991794	0.0955195	0.0919946	0.105144	0.101264	0.0975269	0.093928	0.0904619	0.103555	0.099734	0.0960536	0.092509
	Minimum height where buildings locate	4	ft			1.48	1579.96	#REF!	4.85588	4.5	5138.75	4.79697	1.12151	15.9788	0.079894	0.60337		15.9788	4.42831	82.3092	11.5505		15.9788	2.11706	148.599	13.8617		0	0.453458	223.063	-0.453458		2.46			0.105197	0.101315	0.0975763	0.0939755	0.0905076	0.103252	0.0994422	0.0957726	0.0922384	0.0888346	0.101532	0.0977853	0.0941769	0.0907016
	A factor to account for other damages than buildings	2				1.5	1603.55	#REF!	4.9215	4.5	5138.75	4.79697	1.12151	17.1003	0.0855015	0.688872		17.1003	4.75492	81.1877	12.3454		17.1003	2.32991	147.478	14.7704		0	0.546082	223.063	-0.546082		2.48			0.102586	0.0988006	0.0951546	0.0916433	0.0882615	0.100471	0.0967639	0.0931931	0.0897541	0.086442	0.0986142	0.0949752	0.0914704	0.088095
	Ratio of houses w/ basements	0.5	(1=All have basements; 0=No basements)			1.52	1626.95	#REF!	4.98712	4.5	5138.75	4.79697	1.12151	18.2218	0.0911091	0.779981		18.2218	5.09606	80.0662	13.1257		18.2218	2.55525	146.356	15.6666		0	0.648603	223.063	-0.648603		2.5			0.099344	0.095678	0.0921473	0.0887469	0.085472	0.0970501	0.0934688	0.0900196	0.0866977	0.0834984	0.0950495	0.091542	0.0881639	0.0849105
	Average height of the first floor	0.9	meter			1.54	1650.18	#REF!	5.05274	5	11625.8	10.8526	2.53728	20.7591	0.103795	0.883776		20.7591	5.45198	77.5289	15.3071		20.7591	2.79335	143.819	17.9657		0	0.761314	223.063	-0.761314		2.52			0.0956885	0.0921574	0.0887566	0.0854813	0.0823269	0.0932051	0.0897657	0.0864531	0.0832629	0.0801903	0.091053	0.087693	0.0844569	0.0813403
	Coastal length 12ft	3348.84				1.56	1673.23	#REF!	5.11836	5	11625.8	10.8526	2.53728	23.2964	0.116482	1.00026		23.2964	5.82291	74.9916	17.4735		23.2964	3.04445	141.281	20.2519		0	0.884501	223.063	-0.884501		2.54			0.0925464	0.0891313	0.0858421	0.0826744	0.0796236	0.0898402	0.0865249	0.083332	0.0802569	0.0772953	0.0875086	0.0842794	0.0811693	0.078174
[truncated: 115 more rows]
[truncated: 136 more columns]

## Sheet: Middletown_3
																																				0.0593833	0.059681	0.0599801	0.0602808	0.0605829	0.0713585	0.0717162	0.0720757	0.072437	0.0728001	0.0855146	0.0859432	0.086374	0.0868069
[truncated: 145 more rows]
[truncated: 136 more columns]

[truncated: 52 more sheets: Middletown_4, Middletown_5, Middletown_6, Middletown_7, Norfolk_1, Norfolk_2, Norfolk_3, Norfolk_4, Norfolk_5, Norfolk_6, Norfolk_7, Norfolk_8 , Norfolk_9, Norfolk_10, Wilmington_1, Wilmington_2, Wilmington_3, Wilmington_4, Wilmington_5, Wilmington_6 …]
